# Supplementary material
Source: ML conference proceedings conference paper supplement (https://aclanthology.org/2022.eval4nlp-1.9)
Supplement: SupplementaryMaterial [file 0001.xlsx]

## Sheet: Sheet1
person	source	translation	evaluation: is this a good translation?
person 1	こんにちは。お元気ですか？	Hello, how are you?	y
person 2	はい、元気です。広告代理店での仕事が忙しいですが。	I'm fine,thanks,though it's busy at the advertising agency where I work.	y
person 1	お疲れさまです。私は介護福祉士をしています。	You must be tired. I'm a certified care worker.	n
person 2	介護福祉士として働いていらっしゃるんですね。大変なお仕事ですよね。	Oh, you're a certified care worker? That's a tough job,isn't it?	y
person 1	いえ。広告代理店も大変ですよね。ちなみに私は北海道の一軒家に住んでいます。	Well, working at an advertising agency sounds pretty tough, too. By the way, I live in a house in Hokkaido.	y
person 2	北海道ですか。ご飯の美味しいところで羨ましいです。私は青森県出身で山の多いところが好きなので、山の近くに住んでいます	Hokkaido? It must be nice to live in a place that has such delicious food. I'm from Aomori prefecture and I love mountainous scenery, so I live close to a mountain.	y
person 1	北海道は、美味しいもの多いですよ。青森なら、お近くでしたね。でも、私はいつか東京に住んでみたいんです。	Yes, Hokkaido does have its fair share of delicacies. You're pretty close if you're in Aomori. I'd love to live in Tokyo someday, though.	y
person 2	東京ですか。東京には華やかな場所が多いですよね	Tokyo? I guess there are a lot of vibrant places in Tokyo, right?	y
person 1	田舎生まれの私にとって、とても魅力的な場所です。	As someone who was born in the countryside, Tokyo holds a special allure for me.	y
person 2	私にとっても東京は魅力的な場所ですね。お休みの日は何をされていますか？私は写真が趣味です。	Yeah, I also find Tokyo is a place with a lot of appeal. What do you do on your days off? I like to take photographs.	y
person 1	私は彼氏いない歴も長くて、休みの日はひとりでのんびりしています。写真、いいですね。	I've been single for a pretty long time, so I usually lounge about by myself on my days off. Photography sounds great, though.	n
person 2	1人でのんびりと過ごす時間も大切で、贅沢なものですよ。私もよく家でのんびり過ごしています。	It's important to have time to yourself to relax; lazing around at home is a luxury I also indulge in regularly.	n
