# Supplementary material
Source: ML conference proceedings conference paper supplement (https://aclanthology.org/2022.eval4nlp-1.9)
Supplement: SupplementaryMaterial [file 0001.xlsx]

## Sheet: Sheet1
person	source	translation	evaluation: is this a good translation?
person 1	こんにちは。お元気ですか？	Hi. How are you?	y
person 2	はい、元気です。広告代理店での仕事が忙しいですが。	I'm fine. I'm busy at the ad shop.	y
person 1	お疲れさまです。私は介護福祉士をしています。	Thank you for your help. I'm an carer.	y
person 2	介護福祉士として働いていらっしゃるんですね。大変なお仕事ですよね。	You work as a carer, don't you?	n
person 1	いえ。広告代理店も大変ですよね。ちなみに私は北海道の一軒家に住んでいます。	No, unfortunately, I live in the middle of a drought home.	n
person 2	北海道ですか。ご飯の美味しいところで羨ましいです。私は青森県出身で山の多いところが好きなので、山の近くに住んでいます	North or South, I envy a lot of food from the woods near the blue forest.	n
person 1	北海道は、美味しいもの多いですよ。青森なら、お近くでしたね。でも、私はいつか東京に住んでみたいんです。	The North coast is so delicious, but if I wanted to live somewhere close to Tokyo someday, I'd like to live in Tokyo.	n
person 2	東京ですか。東京には華やかな場所が多いですよね	There's a lot of places in Tokyo.	n
person 1	田舎生まれの私にとって、とても魅力的な場所です。	It's a very attractive place for me in the country.	y
person 2	私にとっても東京は魅力的な場所ですね。お休みの日は何をされていますか？私は写真が趣味です。	Tokyo is a very attractive place for me, too. What have I got for you?	y
person 1	私は彼氏いない歴も長くて、休みの日はひとりでのんびりしています。写真、いいですね。	I haven't had a boyfriend for a long day, a long day, a good photograph, a nice picture.	n
person 2	1人でのんびりと過ごす時間も大切で、贅沢なものですよ。私もよく家でのんびり過ごしています。	I've spent a lot of time with my family, and I've spent my whole life in my life with my family.	n
