# Supplementary material
Source: ML conference proceedings conference paper supplement (https://aclanthology.org/2022.eval4nlp-1.9)
Supplement: SupplementaryMaterial [file 0002.xlsx]

## Sheet: Sheet1
person	source	translation	evaluation: is this a good translation?
person 1	こんにちは。お元気でしたか？	Hi. How are you?	y
person 2	はい、元気にしていました。あなたはどうですか？	Yeah, good. How are you?	y
person 1	私も元気にしていました。休みの日には趣味の写真を楽しんでいます。	I've had a good day, too. I've been having a hobby photo.	y
person 2	写真ですか、いいですね。私は海の近くに住んでいるので、よく散歩をしています。	Look, I've been walking around the sea a lot, okay?	n
person 1	海の近くにお住まいなんですね。綺麗でしょうね。私は山のそばに住んでいます。	You live near the sea, I live near the mountains.	n
person 2	そうなんですね。山も好きなのですが、沖縄に以前住んでいてどうしても海の近くに住みたくて。	You know, I love mountains too, but I really want to live near Okinawa and live near the sea.	n
person 1	生まれ育った場所に似た場所はなんだか心が落ち着きますよね。私も青森出身なのでお気持ちわかります。	I know where you're from, but I feel like you're from Blue Forest.	n
person 2	そうですよね。しかも私は怒りっぽいので、気持ちを静めるにも海はいいんですよ	That's right, and I feel like I'm angry, so I don't mind the ocean.	n
person 1	自然は心を落ち着かせてくれますよね。私も今度海辺の写真を撮りに行きたいです。	nature will calm down, and I'd like to take a picture of the ocean again.	n
person 2	はい、海もさまざまな表情を見せますのでとても良いと思います。	Yes, I think the sea looks very nice.	n
person 1	またおすすめの場所があったらぜひ教えてくださいね。	Let me know if there's any place for you to go again.	y
person 2	はい。私はダンスが得意なんですが、あなたはどうですか？	Yes, I'm very good at dancing, but what about you?	y
person 1	私はダンスにはなかなか縁がなくて、めっきりです。ダンスを見るのは好きなのですが。	I like to watch the dance alone without dancing.	n
person 2	そうなんですね。でも、見るのがお好きなら今度ご披露します	Yes, but if you like to see them again, I'd like to introduce them to you.	n
