# Supplementary material
Source: ML conference proceedings conference paper supplement (https://aclanthology.org/2022.eval4nlp-1.9)
Supplement: SupplementaryMaterial [file 0002.xlsx]

## Sheet: Sheet1
person	source	translation	evaluation: is this a good translation?
person 1	こんにちは。お元気でしたか？	Hello, how have you been?	y
person 2	はい、元気にしていました。あなたはどうですか？	Good, thanks, how about you?	y
person 1	私も元気にしていました。休みの日には趣味の写真を楽しんでいます。	I've been keeping well, too. I've been enjoying photography as a hobby on my days off.	y
person 2	写真ですか、いいですね。私は海の近くに住んでいるので、よく散歩をしています。	Photos? Sounds great. I live near the sea, so I often go for walks down there.	y
person 1	海の近くにお住まいなんですね。綺麗でしょうね。私は山のそばに住んでいます。	You live by the sea? It must be pretty. I live by a mountain.	n
person 2	そうなんですね。山も好きなのですが、沖縄に以前住んでいてどうしても海の近くに住みたくて。	Oh right. I like mountains as well, but I really wanted to live near the sea because I used to live in Okinawa.	y
person 1	生まれ育った場所に似た場所はなんだか心が落ち着きますよね。私も青森出身なのでお気持ちわかります。	I suppose somewhere similar to where you grew up has a kind of calming effect. I'm from Aomori, so I can understand how you feel.	n
person 2	そうですよね。しかも私は怒りっぽいので、気持ちを静めるにも海はいいんですよ	Yeah, I guess. Besides, I'm quite short-tempered, so the sea is quite good for calming me down.	y
person 1	自然は心を落ち着かせてくれますよね。私も今度海辺の写真を撮りに行きたいです。	Nature does soothe the soul, doesn't it? I'd like to go and take photos of the coast next time.	y
person 2	はい、海もさまざまな表情を見せますのでとても良いと思います。	Yeah, I think that's a good idea, because the sea has many different faces.	n
person 1	またおすすめの場所があったらぜひ教えてくださいね。	Please let me know if there are any photo spots you'd recommend.	y
person 2	はい。私はダンスが得意なんですが、あなたはどうですか？	Okay. I'm pretty good at dancing, but how about you?	y
person 1	私はダンスにはなかなか縁がなくて、めっきりです。ダンスを見るのは好きなのですが。	Remarkably, I don't have much luck when it comes to dancing, although I do like to watch dance.	n
person 2	そうなんですね。でも、見るのがお好きなら今度ご披露します	Fair enough, but if you like to watch dancing, I could perform for you sometime.	y
