# Supplementary material
Source: ML conference proceedings conference paper supplement (https://aclanthology.org/2022.eval4nlp-1.9)
Supplement: SupplementaryMaterial [file 0003.xlsx]

## Sheet: Sheet1
person	source	translation	evaluation: is this a good translation?
person 1	こんにちは。わたし、よく怒りっぽいって言われるんですけど、今日は冷静に話すように頑張りますね。	Hello, I'm often told that I'm short-tempered, but I'll do my best to speak calmly today.	y
person 2	こんにちは、よろしくお願い致します。	Hi, thank you.	n
person 1	わたしはダンスが得意です。あなたは？	Dancing's one of my strong suits, is there anything that you're particularly good at?	n
person 2	得意なものはありませんが顔の彫りが深いです。	I'm not particularly good at anything, but I do have chiselled features.	y
person 1	確かに、顔の彫りは深いですね。以前、沖縄に住んでいたことがあるのですが、同じような彫りの深い方が多かったです。	That's certainly true; I used to live in Okinawa, and there were many people who were similarly chiselled.	y
person 2	わたしは沖縄とは関係なく外国で生まれました。今日のような寒い冬の日です。	I've got no connection to Okinawa though, I was born overseas. On a cold winter day like today.	y
person 1	そうだったんですか。わたしは今は海のそばに住んでいるんですが、寒い冬は海のそばはきついです。	Is that so? I live by the sea now, but it can get pretty fierce in winter.	n
person 2	わたしには海沿いに住んでる兄がいるのですが冬の海は寒いとおっしゃていましたね。	My brother lives by the sea, and he said that the winter sea is cold.	y
person 1	やっぱりそうなんですね。ところで、話かわりますが、尊敬している人っていますか？わたしは母親です。	Ah, so it must get cold wherever you are. Incidentally, changing the subject, is there someone that you look up to? For me, it would be my mum.	n
person 2	わたしも母親を尊敬しています。ここまで育ててくれた恩は忘れません。	Yes, I also respect my mum. I will never forget my debt of gratitude to her for raising me to be the person I am today.	n
