# Supplementary material
Source: ML conference proceedings conference paper supplement (https://aclanthology.org/2022.eval4nlp-1.9)
Supplement: SupplementaryMaterial [file 0003.xlsx]

## Sheet: Sheet1
person	source	translation	evaluation: is this a good translation?
person 1	こんにちは。わたし、よく怒りっぽいって言われるんですけど、今日は冷静に話すように頑張りますね。	Hello, I'm getting pretty mad at you, but I'll be happy to talk to you today.	n
person 2	こんにちは、よろしくお願い致します。	Hello. Nice to meet you.	y
person 1	わたしはダンスが得意です。あなたは？	I'm good at dancing. You?	y
person 2	得意なものはありませんが顔の彫りが深いです。	There's nothing good about it, but it's deep in the face of your face.	n
person 1	確かに、顔の彫りは深いですね。以前、沖縄に住んでいたことがあるのですが、同じような彫りの深い方が多かったです。	Yes, it is deep, deep, deep, deep, deep, deep, deep, deep, deep, deep, deep.	n
person 2	わたしは沖縄とは関係なく外国で生まれました。今日のような寒い冬の日です。	I was born in Okinawa today but it wasn't like I was born in Okinawa today.	n
person 1	そうだったんですか。わたしは今は海のそばに住んでいるんですが、寒い冬は海のそばはきついです。	Well, I'm living near the sea now, but winter is hard to live near the sea.	y
person 2	わたしには海沿いに住んでる兄がいるのですが冬の海は寒いとおっしゃていましたね。	I told you my brother lives on the beach and winter is cold.	n
person 1	やっぱりそうなんですね。ところで、話かわりますが、尊敬している人っていますか？わたしは母親です。	Well, by the way, do you think I respect you, by the way, my mother?	n
person 2	わたしも母親を尊敬しています。ここまで育ててくれた恩は忘れません。	I respect your mother too.	n
