# Supplementary material
Source: ML conference proceedings conference paper supplement (https://aclanthology.org/2022.eval4nlp-1.9)
Supplement: SupplementaryMaterial [file 0004.xlsx]

## Sheet: Sheet1
person	source	translation	evaluation: is this a good translation?
person 1	こんばんは、調子はいかがですか？	Good evening, how's it going?	y
person 2	こんばんは。調子はまぁまぁかな？70年代生まれは、そろそろ体に老いを感じ始める頃だよ。	Good evening. I'm okay, I guess. I was born in the 70's, so my age is beginning to catch up on me.	n
person 1	やはり体はしんどいですか？	Do you begin to feel worn out?	n
person 2	そうだね～。まだまだ若い方なんだろうけど、肌の曲がり角みたいなもんで、人間って30~40代くらいで一気に体力落ちるよね。	Yeah. I mean, I'm still younger than other people, but I feel my body's at the start of a slippery slope into decline. I think that as people get into their 30's or 40's they suddenly lose their vitality.	n
person 1	そうなのですね。色々気をつけないとですね。わたしはこの寒い冬の時期に外国で生まれたのですがご出身はどちらですか？	That's true. You need to look after yourself. So, I was born overseas during the cold winter, but where are you from?	n
person 2	わたしは秋田出身だよ。寒い地方だね。	I'm from Akita, which is also a cold region.	y
person 1	そうなのですね。雪が凄そうです。外国生まれですが両親は日本人です、なのに彫りの深い顔立ちでよくハーフかと間違われます。	Oh okay. Yeah, the snow seems terrible there. Even though I was born abroad, both my parents are Japanese, and yet I'm always mistaken for someone who is mixed-race, due to my chiselled features.	n
person 2	そうだね。ハーフ顔だったから、わたしも最初、そう思ったよ。今は学校のそばに住んでいて教師をやっているんだけど、あなたは何をしているの？	True, I actually also thought you were mixed-race to begin with. I now work as a teacher and I live near the school, but what do you do?	n
person 1	今は普通のサラリーマンです。	I'm just an ordinary office worker.	y
person 2	サラリーマンも、毎日大変だよね。わたし、今では体力落ちてきてるけど、昔はチアリーダーをやってたんだ。だから、そういう人を応援したくなってしまうよ。	I guess the daily grind is similarly tough for an office worker. Although I'm no longer as strong as I once was, I used to be a cheerleader. That's why I feel the urge to support people.	n
person 1	わたしには兄がいますがよくチアリーダーに応援して欲しいと言ってましたね。	I have an older brother, and he often said he wanted the cheerleaders to cheer him on.	n
person 2	チアリーダーって、学校では人気があるものね。	Well, in school, the cheerleaders are popular.	y
