# Supplementary material
Source: ML conference proceedings conference paper supplement (https://aclanthology.org/2022.eval4nlp-1.9)
Supplement: SupplementaryMaterial [file 0004.xlsx]

## Sheet: Sheet1
person	source	translation	evaluation: is this a good translation?
person 1	こんばんは、調子はいかがですか？	Good evening. How are you?	y
person 2	こんばんは。調子はまぁまぁかな？70年代生まれは、そろそろ体に老いを感じ始める頃だよ。	Good evening. How are you doing?	n
person 1	やはり体はしんどいですか？	Are you sure you're a little young?	n
person 2	そうだね～。まだまだ若い方なんだろうけど、肌の曲がり角みたいなもんで、人間って30~40代くらいで一気に体力落ちるよね。	Yeah, but I'm sure you're too young to be young for that kind of thing, and you'll be ready to fall in love with the human skin for 300 years.	n
person 1	そうなのですね。色々気をつけないとですね。わたしはこの寒い冬の時期に外国で生まれたのですがご出身はどちらですか？	Well, you should be careful. I was born in this cold time of winter.	n
person 2	わたしは秋田出身だよ。寒い地方だね。	I'm from Akasada.	n
person 1	そうなのですね。雪が凄そうです。外国生まれですが両親は日本人です、なのに彫りの深い顔立ちでよくハーフかと間違われます。	Well, the snow seems to be in Japan, but their parents are Japanese, and they're in a deep, deep, deep, deep, deep, deep, deep, long face.	n
person 2	そうだね。ハーフ顔だったから、わたしも最初、そう思ったよ。今は学校のそばに住んでいて教師をやっているんだけど、あなたは何をしているの？	And you think I'm the first teacher in school now, too, do you?	n
person 1	今は普通のサラリーマンです。	Right now, I'm an ordinary Khaman.	n
person 2	サラリーマンも、毎日大変だよね。わたし、今では体力落ちてきてるけど、昔はチアリーダーをやってたんだ。だから、そういう人を応援したくなってしまうよ。	And I'm getting stronger every day, and I'm getting stronger and I'm trying to be a cheerleader.	n
person 1	わたしには兄がいますがよくチアリーダーに応援して欲しいと言ってましたね。	I have a brother, but you said you wanted me to help the cheerleaders with the cheerleaders.	n
person 2	チアリーダーって、学校では人気があるものね。	The cheerleaders are popular in school.	y
