# Supplementary material
Source: ML conference proceedings conference paper supplement (https://aclanthology.org/2022.eval4nlp-1.9)
Supplement: SupplementaryMaterial [file 0005.xlsx]

## Sheet: Sheet1
person	source	translation	evaluation: is this a good translation?
person 1	こんにちは。お元気ですか？	Hello. How are you?	y
person 2	こんにちわ。寒いですね。私はまずまず元気です。最近どちらかお出かけになりましたか？	Hello, I'm cold. How's it going?	n
person 1	寒いですね。わたしは教師で、学校のそばに住んでいますが最近は出かけてないんです。	I'm cold, but I live next to a teacher, and I haven't been out in a while.	n
person 2	ああ、お仕事も忙しそうですものねえ。私は実家で暮らしていますが、地元の新潟県から出た事がないんですよ。仕事が忙しいのもあるんですが。	Oh, well, I don't have a job to do, and I'm busy living in a new home, so Omodaka has a new job.	n
person 1	新潟はとても寒そうですね！わたしは以前、チアリーダーをやっていたことがあるんですよ。今は学校ばかりです。	Omodaka is so cold I've been doing this before, and I've been at school for a long time.	n
person 2	華やかで良いですね。あれは体力使うんでしょう？ 体が痛くなったりしませんでしたか？	Isn't that a good thing to use a strong body?	n
person 1	当時は若かったので大丈夫でした。７０年代生まれなのでもう、体がいうこときかないです。	I was a young man when I was seven years old, so I'm not talking about my body anymore.	n
person 2	寒い時は特に体が硬くなったりしますからね。私は今整体師をしているんですが、そう言う方は結構多いですね。	When it's cold, I'm getting stronger, especially now, but it's a lot better to say.	n
person 1	整体師さんなんですね。機会があったら、診てもらいたいです。	If you have a chance to see a doctor,	n
person 2	もし通って頂けそうならサービスしますよ。	If you'd like to come through, you can come with us.	n
