# Supplementary material
Source: ML conference proceedings conference paper supplement (https://aclanthology.org/2022.eval4nlp-1.9)
Supplement: SupplementaryMaterial [file 0005.xlsx]

## Sheet: Sheet1
person	source	translation	evaluation: is this a good translation?
person 1	こんにちは。お元気ですか？	Hello, how are you?	y
person 2	こんにちわ。寒いですね。私はまずまず元気です。最近どちらかお出かけになりましたか？	Hello, it's cold isn't it. I'm fine, though. Have you been anywhere nice recently?	n
person 1	寒いですね。わたしは教師で、学校のそばに住んでいますが最近は出かけてないんです。	It is cold isn't it. I'm a teacher and I live close to the school, but I haven't been out anywhere lately.	n
person 2	ああ、お仕事も忙しそうですものねえ。私は実家で暮らしていますが、地元の新潟県から出た事がないんですよ。仕事が忙しいのもあるんですが。	Ah, it sounds like you must be busy with work. I live with my parents and, in fact, I've never set foot outside of Niigata prefecture, where I'm from, partly because my job is pretty busy.	y
person 1	新潟はとても寒そうですね！わたしは以前、チアリーダーをやっていたことがあるんですよ。今は学校ばかりです。	Niigata seems like a very cold place! I was a cheerleader in the past, but now all my time is taken up by the school.	y
person 2	華やかで良いですね。あれは体力使うんでしょう？ 体が痛くなったりしませんでしたか？	Cheerleading is great, it's so flashy. Does it require a lot of strength? Does it make your body ache?	n
person 1	当時は若かったので大丈夫でした。７０年代生まれなのでもう、体がいうこときかないです。	It was fine at the time, because I was young. I was born in the 70's, so my body doesn't respond in the way I want it to anymore.	y
person 2	寒い時は特に体が硬くなったりしますからね。私は今整体師をしているんですが、そう言う方は結構多いですね。	Yeah, the body gets stiff, especially when it's cold. I work as a physical therapist now, and quite a lot of people have a similar complaint.	y
person 1	整体師さんなんですね。機会があったら、診てもらいたいです。	Oh, you're a physical therapist? I'd love it if you could take a look at me, if I get the chance.	n
person 2	もし通って頂けそうならサービスしますよ。	If you're ever in this neck of the woods, I'll do it for free.	n
