# Supplementary material
Source: ML conference proceedings conference paper supplement (https://aclanthology.org/2022.eval4nlp-1.9)
Supplement: SupplementaryMaterial [file 0006.xlsx]

## Sheet: Sheet1
person	source	translation	evaluation: is this a good translation?
person 1	こんにちわ。暫くでしたが、どうされてましたか？	Hello, how have you been?	y
person 2	お久しぶりです。わたしは最近、占いに興味を持ち始めました。	It's been a long time. I've been interested in the dementors lately.	n
person 1	ああ、占いですか。面白そうですけど、当たる物なんでしょうか。	Well, that sounds interesting, don't you think?	n
person 2	そうですね。私はＡ型の１２月、しかも大晦日生まれなんですが、両方の占いを総合してみるとよく当たっています。	Well, I'm going to be the first to see the New Year's Eve tour of New Year's Eve, and I'm going to be able to predict both of them.	n
person 1	大晦日の生まれですか。じゃあ正月に被って誕生日をないがしろにされたんじゃないでしょうか、って言うのは私の弟が元日産れなんで、誕生日を祝ってもらえなかったってこぼしてましたよ。	Well, if I hadn't been born for the New Year's Eve, I'd be happy to say it was my birthday.	n
person 2	まさに、弟さんと同じような感じですよ～	It's just like your brother, Japan, but congratulations on the flag, so I'm happy to hear it now.	n
person 1	でも日本中が旗を立てておめでとうおめでとう言っているからそれで満足してるって今は言ってますけどね。今お仕事は？	What's your job now?	n
person 2	弟さん、とてもポジティブですね！私は普通のＯＬしてます。あなたはどうですか？	What about me, brother?	n
person 1	私は会社を辞めて整体の仕事に就いています。元々柔道をやっていたんでこの仕事は向いているそうなんですよ。	I'm leaving the company, and I've been doing my job since I've been doing my job.	n
person 2	整体師さんなんですね。私は肩がこるので、時々整体に行っています。	You know, sometimes I go up to my shoulder.	n
