# Supplementary material
Source: ML conference proceedings conference paper supplement (https://aclanthology.org/2022.eval4nlp-1.9)
Supplement: SupplementaryMaterial [file 0006.xlsx]

## Sheet: Sheet1
person	source	translation	evaluation: is this a good translation?
person 1	こんにちわ。暫くでしたが、どうされてましたか？	Hi, it's been a while, what have you been up to?	y
person 2	お久しぶりです。わたしは最近、占いに興味を持ち始めました。	Yeah, long time, no see. Recently, I've been getting into fortune-telling.	y
person 1	ああ、占いですか。面白そうですけど、当たる物なんでしょうか。	Oh, fortune-telling? That sounds interesting, but are they ever accurate?	y
person 2	そうですね。私はＡ型の１２月、しかも大晦日生まれなんですが、両方の占いを総合してみるとよく当たっています。	Yes, actually. My blood type is A and I was born in December, on New Year's Eve no less, and if you put both fortunes together, then it's often pretty accurate.	n
person 1	大晦日の生まれですか。じゃあ正月に被って誕生日をないがしろにされたんじゃないでしょうか、って言うのは私の弟が元日産れなんで、誕生日を祝ってもらえなかったってこぼしてましたよ。	You were born on New Year's Eve? In that case, wasn't your birthday slightly neglected because it overlaps with the New Year's holiday? I ask that because my little brother was born on New Year's Day, and he always complained that nobody celebrated his birthday.	y
person 2	まさに、弟さんと同じような感じですよ～	I'm just the same as your little brother then.	n
person 1	でも日本中が旗を立てておめでとうおめでとう言っているからそれで満足してるって今は言ってますけどね。今お仕事は？	But now he's come to terms with it, and is happy that people all over Japan are celebrating at the same time, as though they're toasting him. What's your job now?	n
person 2	弟さん、とてもポジティブですね！私は普通のＯＬしてます。あなたはどうですか？	Your brother sounds incredibly positive! I'm just a regular office worker. What about you?	y
person 1	私は会社を辞めて整体の仕事に就いています。元々柔道をやっていたんでこの仕事は向いているそうなんですよ。	I quit the job I was at, and now I work as a physical therapist. I did judo in the past, so it seems like I'm suited for this job.	y
person 2	整体師さんなんですね。私は肩がこるので、時々整体に行っています。	Oh, you're a physical therapist? I get stiff shoulders, so I see a physical therapist sometimes.	y
