# Supplementary material
Source: ML conference proceedings conference paper supplement (https://aclanthology.org/2022.eval4nlp-1.9)
Supplement: SupplementaryMaterial [file 0007.xlsx]

## Sheet: Sheet1
person	source	translation	evaluation: is this a good translation?
person 1	こんにちは。私は最近、猫を飼い始めました。	Hello, I've started the cat lately.	n
person 2	わあ、羨ましいなあ。私は猫の毛アレルギーだってお母さんが言っていたから飼えないです。飼いたいなあ。猫ちゃん大好き。	Well, I don't envy you, because my mother says I'm allergic to cats.	n
person 1	猫、かわいいですよ。ふわふわで、もうたまらないです。	I love cats, cat. I love them.	n
person 2	いいなあ。私のクラスの子達も、飼っている子が大勢なんで、何だか話題に入っていけないなあ。ねえねえ、好きな食べ物って何ですか＞	Look, I've got a lot of kids in my class who don't like to talk about things I like to talk about, so I don't like to talk about.	n
person 1	アレルギーなら、ちょっと我慢するしかないよね。好きな食べ物は、１２月生まれだからケーキ。	I'm just a little sick for breakfast, so I'm just gonna have to get some food.	n
person 2	え、１２月生まれはケーキ好きなんだあ。私も１２月だからケーキが好きなのかな。この間ね、お母さんがキャロットケーキってのを作って食べさせようとしたんだけど、私ニンジンが嫌いだから。	Well, since December of December, I like to make cake for my mother when she says she loves cake, too.	n
person 1	クリスマス大好きだからね。でも、大晦日生まれ。人参は私も苦手だよ。	Because I love Christmas Eve, but I don't like New Year's Eve either.	n
person 2	ホッとしたあ。大人だって嫌いなものありますよね。私身長が低くて並ぶ時も一番前なんですけど、好き嫌いがあってもお姉さんみたいに大きくなれますよね？	When you're young, you don't like it when you get older, don't you, before I get older?	n
person 1	好き嫌いは、段々なくなるから大丈夫！ちなみに占いにハマってるんだけど、同じ１２月なら似た運勢かもね。血液型は私Ａだけど、どう？	But what if I'm not as big as my sister in February and I'm not as big as I am?	n
person 2	私はＡＢ型ですっ。私わたし占い師になりたいんです。学習雑誌の付録にオシャレな占いブックが付いてて、それで。	I want to be an actor at the BB, and I want to be a publicist, and I want to be a publicist, and I want to be a publicist, and I want to be a publicist, and I want to be a publicist, and I want to be a publicist and I want to be a publicist.	n
person 1	同じ趣味で嬉しいよ。今度、ＡＢ型の占いも一緒にみてあげるね。	And I want to be happy to be a star again, too.	n
person 2	はあい！ また占いのお話聞かせて下さい。あと猫ちゃんもさわりたいです。	Let me ask you again, cat cat.	n
