# Supplementary material
Source: ML conference proceedings conference paper supplement (https://aclanthology.org/2022.eval4nlp-1.9)
Supplement: SupplementaryMaterial [file 0007.xlsx]

## Sheet: Sheet1
person	source	translation	evaluation: is this a good translation?
person 1	こんにちは。私は最近、猫を飼い始めました。	Hi. I got a cat recently.	y
person 2	わあ、羨ましいなあ。私は猫の毛アレルギーだってお母さんが言っていたから飼えないです。飼いたいなあ。猫ちゃん大好き。	Whoa, I'm so jealous. My mum says I'm allergic to cat hair, so I can't have a cat. I want one so much though, I love cats.	n
person 1	猫、かわいいですよ。ふわふわで、もうたまらないです。	Yeah, cats are so cute and fluffy, they're adorable.	n
person 2	いいなあ。私のクラスの子達も、飼っている子が大勢なんで、何だか話題に入っていけないなあ。ねえねえ、好きな食べ物って何ですか＞	So jealous. Lots of kids in my class have cats as well, but I can't really join in the conversation. Hey, what's your favourite food?	y
person 1	アレルギーなら、ちょっと我慢するしかないよね。好きな食べ物は、１２月生まれだからケーキ。	I guess you just have to put up with it if you're allergic. My favorite food is cake, because I was born in December.	y
person 2	え、１２月生まれはケーキ好きなんだあ。私も１２月だからケーキが好きなのかな。この間ね、お母さんがキャロットケーキってのを作って食べさせようとしたんだけど、私ニンジンが嫌いだから。	Huh, people who were born in December love cake? My birthday's in December as well, so I wonder if that means I like cake. The other day, my mum made a carrot cake and tried to make me try some, but I hate carrots.	n
person 1	クリスマス大好きだからね。でも、大晦日生まれ。人参は私も苦手だよ。	It's because I love Christmas, though I was born on New Year's Eve. Carrots are not my cup of tea, either.	y
person 2	ホッとしたあ。大人だって嫌いなものありますよね。私身長が低くて並ぶ時も一番前なんですけど、好き嫌いがあってもお姉さんみたいに大きくなれますよね？	Oh, I'm glad to hear that. So that means there are things that grown-ups don't like, either. I'm short so I'm always at the front when we line up in height order, but do you mean I can grow up big like you even if there's some foods I don't like?	y
person 1	好き嫌いは、段々なくなるから大丈夫！ちなみに占いにハマってるんだけど、同じ１２月なら似た運勢かもね。血液型は私Ａだけど、どう？	Yeah, and pickiness about food gradually disappears anyway, so you'll be fine! By the way, I'm really into fortune-telling, and since our birthdays are both in December I guess our horoscopes will be the same, but my blood type is A, how about you?	n
person 2	私はＡＢ型ですっ。私わたし占い師になりたいんです。学習雑誌の付録にオシャレな占いブックが付いてて、それで。	I'm AB. I'd like to be a fortune teller when I grow up, because there's a cool horoscope book included with an educational magazine that I read.	y
person 1	同じ趣味で嬉しいよ。今度、ＡＢ型の占いも一緒にみてあげるね。	I'm happy to meet someone who shares my passion. Next time we meet, let's look at the horoscope for people whose blood type is AB together.	y
person 2	はあい！ また占いのお話聞かせて下さい。あと猫ちゃんもさわりたいです。	Yeah! Please tell me more about fortune-telling. And I also want to stroke your cat.	y
