# Supplementary material
Source: ML conference proceedings conference paper supplement (https://aclanthology.org/2022.eval4nlp-1.9)
Supplement: SupplementaryMaterial [file 0008.xlsx]

## Sheet: Sheet1
person	source	translation	evaluation: is this a good translation?
person 1	こんにちわ。お久しぶりですが、お元気でしたか？	Hello, how are you?	n
person 2	元気にしていますよ。今、妊娠していてお休みしています。	I'm fine. I'm pregnant now.	n
person 1	わあっおめでとうございます。私が生まれた時お姉ちゃんはブスッとしてたそうですけど、他に子供はいるんですか？	Congratulations. When I was born, did you have any other kids?	n
person 2	結婚したばかりで、初めての子供ですよ。だから、とても楽しみです。	That's why I'm the first child I ever got married.	n
person 1	良かったですね。赤ちゃん可愛いだろうなあ。私は男なのにおとめ座なんで、クラスで皆から馬鹿にされたりしてるんです。	Well, that's good, 'cause I'm a pretty little girl, and I'm all fucked up in class yesterday, and I'm just a jerk.	n
person 2	お友達、ひどいですね。でもあまり深く悩まないでくださいね。	Don't get too carried away, my friend.	n
person 1	姉ちゃんは「生まれてくる日は選べないんだから泣くな」って言ってます。姉ちゃんは占いが好きみたいで、私もそれで占いが好きになりました。	She said, "Don't cry, 'cause she likes to hear it, so don't cry,' cause I like to hear it too."	n
person 2	占いですか、いいですね。ちなみにもう学校で英語勉強していますか？私は、外国語を趣味でやっています。	Are you studying English in school now?	n
person 1	はい、外国の人が、いけねえ、先生が来て教わってます。でも趣味で外国語って凄いですね。勉強家なんだ。	Yes, but a foreigner can't learn how to speak English.	n
person 2	先生が来てくれて、いいですね。私はお尻が大きいので、時々外国人に間違われますよ。	And sometimes I'm a big foreigner, and I'm a big alien.	n
