# Supplementary material
Source: ML conference proceedings conference paper supplement (https://aclanthology.org/2022.eval4nlp-1.9)
Supplement: SupplementaryMaterial [file 0008.xlsx]

## Sheet: Sheet1
person	source	translation	evaluation: is this a good translation?
person 1	こんにちわ。お久しぶりですが、お元気でしたか？	Hi, it's good to see you, how have you been?	y
person 2	元気にしていますよ。今、妊娠していてお休みしています。	Yeah, I'm doing well. I'm pregnant, so I'm on maternity leave right now.	y
person 1	わあっおめでとうございます。私が生まれた時お姉ちゃんはブスッとしてたそうですけど、他に子供はいるんですか？	Wow, congratulations. I've heard that my sister got really sulky when I was born, but do you have any other children?	y
person 2	結婚したばかりで、初めての子供ですよ。だから、とても楽しみです。	I've only just got married and this will be our first child, so I'm really excited.	y
person 1	良かったですね。赤ちゃん可愛いだろうなあ。私は男なのにおとめ座なんで、クラスで皆から馬鹿にされたりしてるんです。	Oh, cool. I'm sure the baby will be cute. I'm a guy, but I'm a Virgo, so everyone in my class makes fun of me.	n
person 2	お友達、ひどいですね。でもあまり深く悩まないでくださいね。	Your friends sound awful. But I wouldn't worry about it too much.	n
person 1	姉ちゃんは「生まれてくる日は選べないんだから泣くな」って言ってます。姉ちゃんは占いが好きみたいで、私もそれで占いが好きになりました。	My sister tells me not to cry over it, because you can't choose the day you're born. My sister seems to like horoscopes, that's why I also like horoscopes.	y
person 2	占いですか、いいですね。ちなみにもう学校で英語勉強していますか？私は、外国語を趣味でやっています。	Horoscopes? That's interesting. By the way, have you begun studying English as school? I like learning languages as a hobby.	y
person 1	はい、外国の人が、いけねえ、先生が来て教わってます。でも趣味で外国語って凄いですね。勉強家なんだ。	Yeah, we're taught by this foreigner- wait no, I shouldn't say that, er, a teacher who comes to the school. But that's cool that you're learning languages as a hobby. That's very dedicated.	n
person 2	先生が来てくれて、いいですね。私はお尻が大きいので、時々外国人に間違われますよ。	That's good that a teacher comes to the school. People sometimes mistake me for a foreigner, because of my large body frame.	y
