# Supplementary material
Source: ML conference proceedings conference paper supplement (https://aclanthology.org/2022.eval4nlp-1.9)
Supplement: SupplementaryMaterial [file 0009.xlsx]

## Sheet: Sheet1
person	source	translation	evaluation: is this a good translation?
person 1	こんにちは。お元気ですか？	Hello, how are you?	y
person 2	あまり元気とは言いかねますね。妻と離婚したばかりなので。	I can't say that I'm doing great, I just got divorced from my wife.	n
person 1	そうなんですね。それはお辛いですね。	Oh gosh. That must be tough.	y
person 2	定年退職したら、妻に離婚届を突き付けられてね、がっくりですよ。	I retired, then my wife served me with divorce papers, so I'm really heartbroken.	n
person 1	晩年離婚、増えてますよね。お気の毒です。私も結婚していて今、産休中なんですが夫とあまりうまくいっていません。	Divorce in later years is on the rise, isn't it. I'm sorry for the pain you're going through. I'm married, and I'm currently on maternity leave, but I haven't been getting on well with my husband recently.	n
person 2	おやおや、でもお子さんができるとまた変わるかもしれませんよ。うちは子どもがいませんでしたからね。	Oh dear, but things might change once your child is born. We didn't have any children, you see.	n
person 1	そうだとよいのですが。私は外国語が趣味なので、語学を学んで気分転換しています。	I hope so. My hobby is language learning, and so I'm doing that at the moment to take my mind off things.	y
person 2	いいですね。わたしは釣りが好きなので、これからは釣り三昧で行こうと思ってます。	That's nice. I enjoy fishing, so I'm thinking I'll get absorbed in fishing from now on.	n
person 1	そうですね。好きなことをして過ごすことで、気持ちも段々晴れてくると思います。	Yes, if you do the things you enjoy, I think you'll gradually start to feel better.	y
person 2	ああ、なんだか気分が軽くなりました。ありがとうございました。	Ah, I already feel like a load has been taken off my mind. Thank you.	y
person 1	良かったです。お互いに元気でいられたら良いですね。	I'm glad to hear that. I hope we can both be happy.	y
person 2	まったくですね。安産をお祈りしますよ。	Indeed. I pray you have a safe delivery.	y
