# Supplementary material
Source: ML conference proceedings conference paper supplement (https://aclanthology.org/2022.eval4nlp-1.9)
Supplement: SupplementaryMaterial [file 0009.xlsx]

## Sheet: Sheet1
person	source	translation	evaluation: is this a good translation?
person 1	こんにちは。お元気ですか？	Hello. How are you?	y
person 2	あまり元気とは言いかねますね。妻と離婚したばかりなので。	I'm afraid I just got a divorce with my wife.	y
person 1	そうなんですね。それはお辛いですね。	Well, that's hard to say.	n
person 2	定年退職したら、妻に離婚届を突き付けられてね、がっくりですよ。	When I retired, my wife got a divorce report from my wife.	n
person 1	晩年離婚、増えてますよね。お気の毒です。私も結婚していて今、産休中なんですが夫とあまりうまくいっていません。	It's been a long time since my husband was married, and I'm not very good at getting married right now.	n
person 2	おやおや、でもお子さんができるとまた変わるかもしれませんよ。うちは子どもがいませんでしたからね。	Well, if you could have a child again, we wouldn't have had children again.	n
person 1	そうだとよいのですが。私は外国語が趣味なので、語学を学んで気分転換しています。	Well, I hope so, because I'm an foreigner, so I'm starting to learn how to speak English.	n
person 2	いいですね。わたしは釣りが好きなので、これからは釣り三昧で行こうと思ってます。	Okay, I'm gonna go fishing now, because I like fishing.	y
person 1	そうですね。好きなことをして過ごすことで、気持ちも段々晴れてくると思います。	Yeah, I think you'll do whatever you want to do, but you'll feel better.	n
person 2	ああ、なんだか気分が軽くなりました。ありがとうございました。	Oh, I feel better. Thank you very much.	y
person 1	良かったです。お互いに元気でいられたら良いですね。	Good. If you're all right with us, we'll all be fine.	y
person 2	まったくですね。安産をお祈りしますよ。	Well, thank you very much.	n
