# Supplementary material
Source: ML conference proceedings conference paper supplement (https://aclanthology.org/2022.eval4nlp-1.9)
Supplement: SupplementaryMaterial [file 0010.xlsx]

## Sheet: Sheet1
person	source	translation	evaluation: is this a good translation?
person 1	こんにちは。お話して大丈夫ですか？	Hello, can I talk to you?	y
person 2	はい、大丈夫です。今、飼っている熱帯魚の世話をしていたところです。	Yes, I'm fine. I was just looking after a hot fish.	n
person 1	ほほお熱帯魚ですか。きれいなことでしょうね。	Is it a hot fish or a beautiful fish?	n
person 2	はい、私はエステティシャンをしていて、普段忙しいのでとても癒されます。	Yes, I've been working very hard, usually because I'm busy.	n
person 1	華やかそうなお仕事で羨ましいですね。わたしは先日定年を迎えて自由の身になりました。	You look like you're lucky to have a good job last year, and I'm finally free.	n
person 2	そうなんですね。ゆっくりされてくださいね。私はネイリストも目指しているところです。	Yeah, well, I'm still trying to be a good list of names.	n
person 1	それでは総合美容家を目指せそうですね。わたしは体で自慢できるのは虫歯がないことぐらいなんで、美しさに磨きをかける方は尊敬します。	Well, I respect the beauty of my body as much as I can without the sugar teeth.	n
person 2	ありがとうございます。虫歯がないなんて、とても羨ましいです！	Thank you, I'm so lucky you don't have no teeth!	n
person 1	その代わり髪は薄いので、美容とは縁がありません。	That hair doesn't have hair and hair, so there's no hair.	n
person 2	定年されたので、これからおしゃれしても良いと思いますよ。ちなみに私は岩手出身ですが、あなたはどちらですか？	I think it's nice to see you, anyway, so where are you from, Iwamoto?	n
person 1	岩手の方なんですか。わたしは宮城の出身なので近いですね。	I'm from the castle near Shibuya.	n
person 2	それは近いですね！奇遇です。	It's a surprise!	n
