# Supplementary material
Source: ML conference proceedings conference paper supplement (https://aclanthology.org/2022.eval4nlp-1.9)
Supplement: SupplementaryMaterial [file 0010.xlsx]

## Sheet: Sheet1
person	source	translation	evaluation: is this a good translation?
person 1	こんにちは。お話して大丈夫ですか？	Hi, is it okay to talk?	y
person 2	はい、大丈夫です。今、飼っている熱帯魚の世話をしていたところです。	Yes, I was just taking care of my tropical fish.	y
person 1	ほほお熱帯魚ですか。きれいなことでしょうね。	Oh-ho, tropical fish? They must be pretty.	y
person 2	はい、私はエステティシャンをしていて、普段忙しいのでとても癒されます。	Yes, I work as a beautician and so I'm usually really busy, but I find them really therapeutic.	y
person 1	華やかそうなお仕事で羨ましいですね。わたしは先日定年を迎えて自由の身になりました。	I envy you for having such a glamourous job. I reached retirement age the other day, so now I'm a free man.	y
person 2	そうなんですね。ゆっくりされてくださいね。私はネイリストも目指しているところです。	Oh, okay, please enjoy your free time. I'm also working towards becoming a nail technician.	y
person 1	それでは総合美容家を目指せそうですね。わたしは体で自慢できるのは虫歯がないことぐらいなんで、美しさに磨きをかける方は尊敬します。	It seems you're aspiring to become an all-inclusive beautician. The only thing I can boast about my body is that I have no fillings, so I respect people who seek beauty.	y
person 2	ありがとうございます。虫歯がないなんて、とても羨ましいです！	Thank you very much. But I'm very jealous that you don't have any fillings!	y
person 1	その代わり髪は薄いので、美容とは縁がありません。	Yeah, but on the other hand, my hair is thinning, so I find that beauty is something for other people.	y
person 2	定年されたので、これからおしゃれしても良いと思いますよ。ちなみに私は岩手出身ですが、あなたはどちらですか？	But, now that you're retired, I think it would be nice to spruce yourself up. Incidentally, I'm from Iwate, how about you.	n
person 1	岩手の方なんですか。わたしは宮城の出身なので近いですね。	Iwate, I see. I'm from Miyagi, so we're close.	y
person 2	それは近いですね！奇遇です。	Oh, that is close! What a coincidence.	n
