# Supplementary material
Source: ML conference proceedings conference paper supplement (https://aclanthology.org/2022.eval4nlp-1.9)
Supplement: SupplementaryMaterial [file 0011.xlsx]

## Sheet: Sheet1
person	source	translation	evaluation: is this a good translation?
person 1	hi i am sally , i live with my sweet dogs in taos , new mexico .	こんにちは私はサリー・ドリー新しい犬とメキシコの新しいメキシコの新しい犬と住んでるの	n
person 2	hi ! i have just been sitting here playing the piano and singing along	ピアノと歌を歌ってたのよ	n
person 1	i have wonderful memories of my mother playing and singing to me .	母の夢を見て歌を歌ってくれた	n
person 2	www . i also like to dance but i cannot do that while i am playing . . lol	ダンスが好きなんだけど私が演奏してる間に踊れないの	n
person 1	maybe you will have to record your playing and dance to it .	レコードを弾いて踊って踊るのよ	n
person 2	great idea ! love staying up late so i could do that even tonight	いい考えだ今夜も遅くなるから	n
person 1	do you have a day job ?	仕事はあるか ？	n
person 2	i am a nurse who teaches nutrition classes	私は看護師です	n
person 1	interesting , i am a struggling artist and part time tutor	面白い話だが私は芸術家なんだ	n
person 2	since being a vegetarian i feel its important to instruct people how to eat	ベジタリアンになってから人を食べさせるのが重要なんだ	n
person 1	great commitment to your beliefs . i admit i still eat meat only less .	信じられない肉しか食べないのは分かってる	n
person 2	that is ok everything in moderation !	近代的には大丈夫だ ！	n
person 1	do you have any pets ?	ペットはいる ？	y
person 2	i have a cat named radar	私には猫の名前があります	n
