# Supplementary material
Source: ML conference proceedings conference paper supplement (https://aclanthology.org/2022.eval4nlp-1.9)
Supplement: SupplementaryMaterial [file 0011.xlsx]

## Sheet: Sheet1
person	source	translation	evaluation: is this a good translation?
person 1	はじめまして。こんにちは。	Hi, nice to meet you.	y
person 2	こんにちは。わたしはいま高校で陸上部に入ってるんですけど。	Hello, I'm a member of my high school's athletics club.	y
person 1	高校生なんですね！私はエステティシャンをしています。	Oh, so you're a high school student! I am a beautician.	y
person 2	かっこいいですね。実は早起きが苦手で朝練が辛いんですよね。	That's cool. The thing is, I'm not a morning person, so it's hard to get up and train in the morning.	y
person 1	わかりますよ。私も部活をしていた頃は、早起きが辛かったです。	I feel your pain, I found it difficult to wake up early when I was doing high school club activities.	n
person 2	ですよね。どうやって朝起きしていらっしゃったんですか？	I know, right. How did you get up in the mornings?	n
person 1	目覚ましを何個もかけていましたね。母親も起こしてくれましたし。	I set loads of alarms. My mum would also wake me up.	y
person 2	わたしはおばあちゃんっ子なので、おばあちゃんが起こしてくれるんですが、ソフト過ぎて起きられないんですよね。	I'm really close to my grandma, and she comes to wake me up, but her approach is too soft to actually wake me.	y
person 1	なんだか想像できます。ちなみに、好きな作家は宮沢賢治ですが、読書はしますか？	I can imagine. Incidentally, my favourite author is Kenji Miyazawa, but do you enjoy reading?	n
person 2	あまり読みませんが、その本は知ってます。ファンタジーですよね。	I don't read much, but I know his books; they're kind of fantasy, aren't they?	y
person 1	そうなんですよ。ぜひ読んでみてください。	That’s right. You should check them out.	y
person 2	分かりました。探してみますね。	Okay. I'll have a look for them.	n
