# Supplementary material
Source: ML conference proceedings conference paper supplement (https://aclanthology.org/2022.eval4nlp-1.9)
Supplement: SupplementaryMaterial [file 0011.xlsx]

## Sheet: Sheet1
person	source	translation	evaluation: is this a good translation?
person 1	hi i am sally , i live with my sweet dogs in taos , new mexico .	こんにちは、サリーです。ニューメキシコ州タオスで愛犬達と一緒に暮らしています。	y
person 2	hi ! i have just been sitting here playing the piano and singing along	こんにちは！私はここに座ってピアノを弾きながら歌ってたところです。	y
person 1	i have wonderful memories of my mother playing and singing to me .	私には母がピアノを弾きながら歌ってくれた素敵な思い出がありますよ。	y
person 2	www . i also like to dance but i cannot do that while i am playing . . lol	あー。私はダンスも好きなんですが、ピアノを弾きながらはできないですよね・・・（笑）。	y
person 1	maybe you will have to record your playing and dance to it .	ピアノを弾くのを録音して、それに合わせてダンスしたらどうでしょう。	y
person 2	great idea ! love staying up late so i could do that even tonight	素晴らしい考えですね！夜ふかしするのが大好きなので、今夜にでもやってみようかな。	y
person 1	do you have a day job ?	昼間は働いているんですか？	y
person 2	i am a nurse who teaches nutrition classes	私は看護師で栄養学のクラスで教えてます。	y
person 1	interesting , i am a struggling artist and part time tutor	興味深いですね、私は売れない芸術家兼パートの家庭教師です。	y
person 2	since being a vegetarian i feel its important to instruct people how to eat	自分がベジタリアンなこともあって、皆さんに食事の仕方を教えるのは大事なことだと思うんです。	y
person 1	great commitment to your beliefs . i admit i still eat meat only less .	自分の信念に真剣に取り組んでいるんですね。白状すると私はまだお肉を食べますよ、減らしただけで。	y
person 2	that is ok everything in moderation !	それで良いんですよ、何事もほどほどで！	y
person 1	do you have any pets ?	なにかペットは飼っていますか？	y
person 2	i have a cat named radar	レーダーという名前の猫がいます。	y
