# Supplementary material
Source: ML conference proceedings conference paper supplement (https://aclanthology.org/2022.eval4nlp-1.9)
Supplement: SupplementaryMaterial [file 0011.xlsx]

## Sheet: Sheet1
person	source	translation	evaluation: is this a good translation?
person 1	はじめまして。こんにちは。	Hello.	n
person 2	こんにちは。わたしはいま高校で陸上部に入ってるんですけど。	Hi, I'm in high school now.	n
person 1	高校生なんですね！私はエステティシャンをしています。	I'm in high school!	n
person 2	かっこいいですね。実は早起きが苦手で朝練が辛いんですよね。	That's really cool, actually, but I'm not good at getting up early.	n
person 1	わかりますよ。私も部活をしていた頃は、早起きが辛かったです。	I know. When I was in the fraternity, it was a tough time.	n
person 2	ですよね。どうやって朝起きしていらっしゃったんですか？	How did you get up here this morning?	n
person 1	目覚ましを何個もかけていましたね。母親も起こしてくれましたし。	You've been awake a lot. Your mother woke me up, too.	n
person 2	わたしはおばあちゃんっ子なので、おばあちゃんが起こしてくれるんですが、ソフト過ぎて起きられないんですよね。	I can't wake up because my grandma's a little boy, so the software's too bright.	n
person 1	なんだか想像できます。ちなみに、好きな作家は宮沢賢治ですが、読書はしますか？	By the way, do you read your favorite writer?	n
person 2	あまり読みませんが、その本は知ってます。ファンタジーですよね。	I don't read much, but that book is fantastic, right?	n
person 1	そうなんですよ。ぜひ読んでみてください。	Yes, you can read it.	y
person 2	分かりました。探してみますね。	All right. I'm looking for it.	y
