# Supplementary material
Source: ML conference proceedings conference paper supplement (https://aclanthology.org/2022.eval4nlp-1.9)
Supplement: SupplementaryMaterial [file 0012.xlsx]

## Sheet: Sheet1
person	source	translation	evaluation: is this a good translation?
person 1	こんにちは、今頃起きてしまいました。	Hello. I'm up right now.	y
person 2	こんにちは。ゆっくり寝られるのは良いことですね。私はコンビニの店員をしているので、寝る時間はまちまちなんです。	Hello. It's good to sleep slowly, so I'm in the convenience store, so I'm in the middle of a convenience store.	n
person 1	わたし高校の陸上部に入っていて朝練もあるんですけど、早起きがとにかく苦手で。	I've been in high school all morning, but it's not good to be able to sleep.	n
person 2	早起きは、辛いですよね。陸上部、すごいですね！	It's a tough day to get up and get up on land!	n
person 1	それほどでもないです。おばあちゃんには走るより勉強って怒られちゃうんですけどね。	Not so much, Grandma, but I'm going to study more than running away.	n
person 2	でも若いうちが、体の鍛え時ですものね。夢はありますか？私はの夢は、ファッションデザイナーになることです。	But when I was younger, did I dream about fashion designer?	n
person 1	デザイナーですか、かっこいいですね！どんな服を作るんですか？	What kind of designer do you make?	n
person 2	今はまだ、勉強中なんですよ。ファッション雑誌を読んだり、漫画も好きなので漫画からもヒントを得たりしています。	Well, I'm still studying fashion magazines, and I'm still studying comic books, and I got a clue from my favorite comic book.	n
person 1	ああ、漫画のファッションってすごいですもんね、なんか現実離れしてるのもあったりして。	Yeah, it's amazing that there's something out there about comic books.	n
person 2	そうなんですよ。奇抜なものもあったりするので、意外と参考になります。	Yes, there's something really strange going on here.	n
person 1	そうなんだ、陸上の漫画を見てると結構練習のヒントがあったりするからちょっと似てますね。	Well, there's some kind of comic books on the land or something that can practice a little bit.	n
person 2	そうなんですね！漫画もいい文化ですよね。	Yeah, well, that's a great culture.	y
