# Supplementary material
Source: ML conference proceedings conference paper supplement (https://aclanthology.org/2022.eval4nlp-1.9)
Supplement: SupplementaryMaterial [file 0012.xlsx]

## Sheet: Sheet1
person	source	translation	evaluation: is this a good translation?
person 1	こんにちは、今頃起きてしまいました。	Hi, I've only just woken up.	n
person 2	こんにちは。ゆっくり寝られるのは良いことですね。私はコンビニの店員をしているので、寝る時間はまちまちなんです。	Hello, it's good to be able to have a lie-in. I work shifts at a convenience store, so I have different sleeping times.	n
person 1	わたし高校の陸上部に入っていて朝練もあるんですけど、早起きがとにかく苦手で。	I'm in the high school athletics club so we have training in the morning, but I'm not very good at getting up early.	y
person 2	早起きは、辛いですよね。陸上部、すごいですね！	Yeah, getting up early is difficult, isn't it? But the athletics club, that's impressive!	n
person 1	それほどでもないです。おばあちゃんには走るより勉強って怒られちゃうんですけどね。	Not really. My grandma gets angry and says I should be studying rather than running.	y
person 2	でも若いうちが、体の鍛え時ですものね。夢はありますか？私はの夢は、ファッションデザイナーになることです。	But the time to hone your body is when you're young. Do you have any dreams for the future? My dream is to become a fashion designer.	n
person 1	デザイナーですか、かっこいいですね！どんな服を作るんですか？	A designer? That's cool! What kind of clothes do you make?	y
person 2	今はまだ、勉強中なんですよ。ファッション雑誌を読んだり、漫画も好きなので漫画からもヒントを得たりしています。	I haven't made anything yet, I'm still studying. I read fashion magazines, and I also like manga, so I get fashion tips from manga.	y
person 1	ああ、漫画のファッションってすごいですもんね、なんか現実離れしてるのもあったりして。	Oh yeah, the fashion in manga is amazing, some of the looks are out of this world.	n
person 2	そうなんですよ。奇抜なものもあったりするので、意外と参考になります。	Yeah, exactly. Some of the clothing is so unconventional, it's surprisingly useful as a reference.	y
person 1	そうなんだ、陸上の漫画を見てると結構練習のヒントがあったりするからちょっと似てますね。	Oh really, well I guess it's like when I read athletics mangas, as I come across quite a few training tips.	y
person 2	そうなんですね！漫画もいい文化ですよね。	Exactly! Mangas are a great part of culture.	y
