# Supplementary material
Source: ML conference proceedings conference paper supplement (https://aclanthology.org/2022.eval4nlp-1.9)
Supplement: SupplementaryMaterial [file 0013.xlsx]

## Sheet: Sheet1
person	source	translation	evaluation: is this a good translation?
person 1	こんにちは。お元気ですか？	Hello, how are you?	y
person 2	こんにちは！元気ですよ。あなたは最近いかかですか？	Hi! I'm great, thanks. How have you been recently?	y
person 1	良かったです。私は、コンビニの店員になりました。	I'm glad to hear that. I started working at a convenience store.	n
person 2	コンビニで働かれてるんですね。わたしはやっと念願のキャビンアテンダントになりましたよ。毎日お忙しそうですね。	Oh, you work at a convenience store? I finally achieved my dream of becoming a cabin attendant. I guess you're busy every day.	y
person 1	おめでとうございます！わたしは、山形生まれだからか暑さが苦手なので、コンビニはとても良い仕事場なんです。	Congratulations! Perhaps it's because I'm from Yamagata, I don't like the hot weather, therefore, a convenience store makes for a great place to work.	n
person 2	コンビニだと涼しそうですものね！わたしは晴れている日が好きなくらい、クーラーの効いた部屋より、野外で過ごすことが本当は好きなんです。	It does seem like it would be cool at the convenience store. I like sunny days so much that I'd actually prefer to spend them outdoors rather than in an air-conditioned room.	n
person 1	はい、とても涼しくて快適です。あなたは暑さに強いんですね！	Yes, it's very cool and pleasant in there. You can take the heat, then!	y
person 2	そうですね、趣味は映画鑑賞ですが、それ以外はアウトドアで過ごすことが多いです。	Yes, well, I enjoy watching films, but other than that, I spend most of my time outdoors.	y
person 1	映画、私も好きです。あと、漫画を読むことも好きなんですよ。	I like films, too. I also enjoy reading manga.	y
person 2	漫画も面白いですよね、勉強になりますし。ところでご結婚されているんですか？わたしは好きな人がいて、誕生日の11月22日、いい夫婦の日に入籍予定です。	Mangas are great, you can even learn stuff from them. By the way, are you married? I have a boyfriend, and we plan to get married on my birthday, November 22nd, because it's an auspicious day for married couples.	n
person 1	ご結婚、おめでとうございます！いい日に入籍できて、羨ましいです。わたしはまだ、彼氏もいないです。	Congratulations on your wedding! I'm envious that you're able to marry on such an auspicious day. I don't even have a boyfriend.	y
person 2	ありがとうございます、いい方が見るかるといいですね。	Thank you very much, I hope you find someone nice.	y
