# Supplementary material
Source: ML conference proceedings conference paper supplement (https://aclanthology.org/2022.eval4nlp-1.9)
Supplement: SupplementaryMaterial [file 0013.xlsx]

## Sheet: Sheet1
person	source	translation	evaluation: is this a good translation?
person 1	こんにちは。お元気ですか？	Hello, how are you?	y
person 2	こんにちは！元気ですよ。あなたは最近いかかですか？	Hello, how are you today?	n
person 1	良かったです。私は、コンビニの店員になりました。	Good. I'm going to the convenience store.	n
person 2	コンビニで働かれてるんですね。わたしはやっと念願のキャビンアテンダントになりましたよ。毎日お忙しそうですね。	You're working at the convenience store, and I'm still busy every day.	n
person 1	おめでとうございます！わたしは、山形生まれだからか暑さが苦手なので、コンビニはとても良い仕事場なんです。	Congratulations, because I'm born in a mountain or a lot of heat, and I'm very busy with the convenience store.	n
person 2	コンビニだと涼しそうですものね！わたしは晴れている日が好きなくらい、クーラーの効いた部屋より、野外で過ごすことが本当は好きなんです。	I really liked to spend the rest of my life in a convenience store, so I really liked to spend more time outside of Cooby's room.	n
person 1	はい、とても涼しくて快適です。あなたは暑さに強いんですね！	Yes, you're so cool with the heat!	n
person 2	そうですね、趣味は映画鑑賞ですが、それ以外はアウトドアで過ごすことが多いです。	Well, my hobby is a film star, but that's a lot of doors to spend on.	n
person 1	映画、私も好きです。あと、漫画を読むことも好きなんですよ。	I like to read comic books after the movie.	n
person 2	漫画も面白いですよね、勉強になりますし。ところでご結婚されているんですか？わたしは好きな人がいて、誕生日の11月22日、いい夫婦の日に入籍予定です。	That's funny, by the way, do you have any fans of comic books, by the way, do I like getting married?	n
person 1	ご結婚、おめでとうございます！いい日に入籍できて、羨ましいです。わたしはまだ、彼氏もいないです。	Congratulations on your wedding day, but I still have no boyfriend.	n
person 2	ありがとうございます、いい方が見るかるといいですね。	Thank you very much, very much, very much, very much.	n
