# Supplementary material
Source: ML conference proceedings conference paper supplement (https://aclanthology.org/2022.eval4nlp-1.9)
Supplement: SupplementaryMaterial [file 0013.xlsx]

## Sheet: Sheet1
person	source	translation	evaluation: is this a good translation?
person 1	hey how are you today ?	やあ、調子はどう？	y
person 2	great ! just go off work at the smoothie shop . you ?	元気だよ！スムージー屋での仕事が終わったところ、君は？	y
person 1	i have been eating tacos and getting ready to move to school .	タコスを食べたり、学校に引っ越す準備をしてたよ。	y
person 2	are you going to college ? i go to a local one .	大学に行くの？僕は地元の大学に通ってるんだ。	y
person 1	yes , i am going to university of michigan . what year are you ?	うん、ミシガン大に行くよ、君は何年生？	y
person 2	first yr ! do you have any hobbies ?	一年生！なにか趣味はある？	y
person 1	i love doing anything outdoors . especially in summer . you ?	アウトドアなら何でも大好き。特に夏はね。君は？	y
person 2	i love watching college basketball and rocking out to classic rock .	大学バスケを見るのとクラシックロックでノリノリになるのが大好きなんだ。	y
person 1	fun . have you decided on your major for school ?	楽しいよね。もう学校の専攻は決めた？	y
person 2	not yet . have you decided ?	まだだよ。君は決めた？	y
person 1	pre med . i would love to be a doctor	医学部予科。医者になりたいんだ。	y
person 2	that is so nice ! i wish you luck .	素晴らしいね！うまくいきますように。	y
