# Supplementary material
Source: ML conference proceedings conference paper supplement (https://aclanthology.org/2022.eval4nlp-1.9)
Supplement: SupplementaryMaterial [file 0013.xlsx]

## Sheet: Sheet1
person	source	translation	evaluation: is this a good translation?
person 1	hey how are you today ?	今日はどうだった ？	y
person 2	great ! just go off work at the smoothie shop . you ?	スムージーショップで働いてくれ	n
person 1	i have been eating tacos and getting ready to move to school .	俺はタコスを食べて学校に行く準備をしてたんだ	n
person 2	are you going to college ? i go to a local one .	大学に行くの ？	n
person 1	yes , i am going to university of michigan . what year are you ?	ええ大学に行くのあなたは何年 ？	n
person 2	first yr ! do you have any hobbies ?	まずコヨーテはあるか ？	n
person 1	i love doing anything outdoors . especially in summer . you ?	大好きなんだ夏はドアを開けてもいい ？	n
person 2	i love watching college basketball and rocking out to classic rock .	大学生のバスケを見てクラシックロックに飛び込むのが好きなんだ	n
person 1	fun . have you decided on your major for school ?	楽しんで学校で決めたの ？	n
person 2	not yet . have you decided ?	まだ決めてないわ決めた ？	y
person 1	pre med . i would love to be a doctor	医者になりたい	n
person 2	that is so nice ! i wish you luck .	よかった幸運を祈るよ	y
