# Supplementary material
Source: ML conference proceedings conference paper supplement (https://aclanthology.org/2022.eval4nlp-1.9)
Supplement: SupplementaryMaterial [file 0014.xlsx]

## Sheet: Sheet1
person	source	translation	evaluation: is this a good translation?
person 1	こんにちは！わたしはいい夫婦の日である11月22日が誕生日なんですよ。	Hi! My birthday is on November 22nd, which is an auspicious day for married couples.	y
person 2	そうなんですか？もうご結婚はされているんでしょうか。	Oh really? Are you married?	y
person 1	まだ結婚してませんが、好きな人はいます。あなたはご結婚されてるんですか？	Not yet, though I do have a boyfriend. Are you married?	y
person 2	はい、結婚していて、スーパーでパートタイムで働いています。	Yes, I'm married, and I work part-time at a supermarket.	y
person 1	そうなんですね、わたしも早く結婚したいので羨ましいです。	Oh okay. I'm jealous: I want to get married while I'm young.	y
person 2	わたしは勉強苦手なんで、早く結婚することを選びました。でも相手探しはゆっくりで良いと思いますよ。	Well, I was no good in school, so I decided to get married as soon as I could. But, I think it's okay to take your time over finding a partner.	n
person 1	そうですかね、今キャビンアテンダントをしているんですが、それ程出会いには恵まれず、ヤキモキしています。	I think that's probably true, but I'm a cabin attendant, so I don't get that many opportunities to meet people, and I'm getting impatient.	y
person 2	とても出会いがありそうなお仕事なのに、不思議ですね。でもきっと良いタイミングで出会いがあると思いますよ。	That's strange, it seems the kind of job where you would meet people. But, I'm sure you'll meet someone when the time is right.	y
person 1	たくさん出会いはあるのかもしれませんが、映画鑑賞が趣味なので、自分の価値観に合った人じゃないと難しそうです。何か趣味はありますか？	I guess I do meet a lot of people, but my hobby is watching films, and so I think it would be difficult if I was with someone who didn't share my passion. Do you have any hobbies?	y
person 2	趣味が合うのは、大事なポイントですね。映画も好きですが、わたしは貯金が趣味なんです。	Yeah, it's important that your hobbies match. I like movies too, but my real passion lies in saving money.	y
