# Supplementary material
Source: ML conference proceedings conference paper supplement (https://aclanthology.org/2022.eval4nlp-1.9)
Supplement: SupplementaryMaterial [file 0014.xlsx]

## Sheet: Sheet1
person	source	translation	evaluation: is this a good translation?
person 1	こんにちは！わたしはいい夫婦の日である11月22日が誕生日なんですよ。	Hello, I'm a nice couple of couples in November 22.	n
person 2	そうなんですか？もうご結婚はされているんでしょうか。	Are you married already?	n
person 1	まだ結婚してませんが、好きな人はいます。あなたはご結婚されてるんですか？	Are you still married, sir?	n
person 2	はい、結婚していて、スーパーでパートタイムで働いています。	Yes, I'm married at the supermarket.	n
person 1	そうなんですね、わたしも早く結婚したいので羨ましいです。	Well, I'd rather get married too.	n
person 2	わたしは勉強苦手なんで、早く結婚することを選びました。でも相手探しはゆっくりで良いと思いますよ。	I've chosen not to study, but I think it's a good idea to find someone who's not happy to get married.	n
person 1	そうですかね、今キャビンアテンダントをしているんですが、それ程出会いには恵まれず、ヤキモキしています。	Well, I'm looking forward to meeting the Caribbean right now, but it's not much of a good time for us to meet each other.	n
person 2	とても出会いがありそうなお仕事なのに、不思議ですね。でもきっと良いタイミングで出会いがあると思いますよ。	I think we have a very interesting time meeting, but I'm sure there's a good time to meet.	n
person 1	たくさん出会いはあるのかもしれませんが、映画鑑賞が趣味なので、自分の価値観に合った人じゃないと難しそうです。何か趣味はありますか？	A lot of people might have met, so I guess, uh, a lot of movies are worth their while, huh?	n
person 2	趣味が合うのは、大事なポイントですね。映画も好きですが、わたしは貯金が趣味なんです。	Do I like the point of saving my favorite movie?	n
