# Supplementary material
Source: ML conference proceedings conference paper supplement (https://aclanthology.org/2022.eval4nlp-1.9)
Supplement: SupplementaryMaterial [file 0015.xlsx]

## Sheet: Sheet1
person	source	translation	evaluation: is this a good translation?
person 1	こんにちは。わたしは最近、スーパーで働き始めましたが、あなたの近況はいかがですか？	Hello, I recently started working at a supermarket, but what's new with you?	y
person 2	こんにちは、そうなんですね。わたしは最近ドラックストアの店員になりまして、同じバイト仲間とルームシェアしています。	Hello, a supermarket you say? Well, I recently started working at a drugstore, and I'm sharing an apartment with someone who works there part-time.	y
person 1	そうなんですね！わたしはパートです。ルームシェア、憧れていますが楽しいですか？	Oh wow! I work part-time, too. I long to share an apartment with someone, but is it enjoyable?	y
person 2	楽しいし、わたしは遅刻魔なので、いつも起こしてもらえるのが助かります。	Yeah, it's not only fun, but I'm someone who's always late, so it's good to have them there to wake me up all the time.	y
person 1	なるほど、それはいいですね！ちなみにわたしの趣味は貯金ですが、何か趣味はありますか？	I see, that sounds good! By the way, my hobby is to save money, but do you have any hobbies?	y
person 2	貯金できるのはすごいですね。わたしはお金がなかなか貯まらず、ネットサーフィンばかりしています。	That's great that you're able to save money. I'm not good at saving money, I just spend all my time online.	y
person 1	貯金して、海外旅行に行くのが目標なんです。ネットはちょっとしかわからず勉強も苦手ですが、今度機会があったら教えてください。	My goal is to save enough money to go on a trip abroad. I'm not au fait with the internet, and I'm not a good learner, but could you please teach me about it when you get the chance.	n
person 2	海外旅行いいですね！私は実家が観光地の多い栃木なんですが、日本国内の旅行はされないんですか？	A trip abroad sounds great! My parental home is in Tochigi, which has a lot of tourist attractions, but do you ever travel around Japan as well?	y
person 1	ご実家、栃木なんですね！私は茨城なんです。国内旅行も好きでよく行っていますよ。	Oh, you grew up in Tochigi? My parental home is in Ibaraki. And yeah, I like travelling around Japan as well, and often visit places.	n
person 2	茨城ならすぐ隣ですね。茨城も美味しいものとか多そうです。	Oh, if you're from Ibaraki, then that's the next prefecture over. It seems like there's a lot of good food in Ibaraki.	n
