# Supplementary material
Source: ML conference proceedings conference paper supplement (https://aclanthology.org/2022.eval4nlp-1.9)
Supplement: SupplementaryMaterial [file 0015.xlsx]

## Sheet: Sheet1
person	source	translation	evaluation: is this a good translation?
person 1	こんにちは。わたしは最近、スーパーで働き始めましたが、あなたの近況はいかがですか？	Hello, I've been working in supermarket lately, and how's your day closer?	n
person 2	こんにちは、そうなんですね。わたしは最近ドラックストアの店員になりまして、同じバイト仲間とルームシェアしています。	Well, hello, I'm the same guy I've been working with recently and I've been in the same room with my colleagues.	n
person 1	そうなんですね！わたしはパートです。ルームシェア、憧れていますが楽しいですか？	Oh, yeah, I'm having fun with the room!	n
person 2	楽しいし、わたしは遅刻魔なので、いつも起こしてもらえるのが助かります。	Enjoy, I'm always late, so I'd be lucky to wake you up all the time.	n
person 1	なるほど、それはいいですね！ちなみにわたしの趣味は貯金ですが、何か趣味はありますか？	Well, that's good, anyway. What do I have to do for you?	n
person 2	貯金できるのはすごいですね。わたしはお金がなかなか貯まらず、ネットサーフィンばかりしています。	It's great to be able to save money, but I can't afford to be able to get a server.	n
person 1	貯金して、海外旅行に行くのが目標なんです。ネットはちょっとしかわからず勉強も苦手ですが、今度機会があったら教えてください。	I don't know if I can learn how to travel abroad, but if I had a chance to learn how to travel, I'd have to learn how to travel again.	n
person 2	海外旅行いいですね！私は実家が観光地の多い栃木なんですが、日本国内の旅行はされないんですか？	I'm a long way away from home, but I don't travel in Japan?	n
person 1	ご実家、栃木なんですね！私は茨城なんです。国内旅行も好きでよく行っていますよ。	I love traveling in the home of my family too!	n
person 2	茨城ならすぐ隣ですね。茨城も美味しいものとか多そうです。	Then there's a lot of nice castle next door.	n
