# Supplementary material
Source: ML conference proceedings conference paper supplement (https://aclanthology.org/2022.eval4nlp-1.9)
Supplement: SupplementaryMaterial [file 0016.xlsx]

## Sheet: Sheet1
person	source	translation	evaluation: is this a good translation?
person 1	こんにちは、最近趣味のネットサーフィンにはまってるんですが、何かハマっているものはありますか？	Hello, I've been working on some of my kind's junk surfers lately?	n
person 2	こんにちは。わたしは、音楽鑑賞が趣味なので、毎日音楽を聴いています。	Hello, I'm listening to music every day because I'm a hobby of music.	n
person 1	音楽鑑賞も楽しいですよね！わたしはドラックストアの店員なんですが、遅刻魔なもので、よく遅刻しては怒られてます。	You enjoy music, I'm late, and I'm too late for that.	n
person 2	音楽好きが極まって、楽器メーカーに勤務しています。ドラッグストア、お仕事大変そうなので寝坊するのもわかる気がします。	I know you like music, but I know you're working for the instrument maker, and I know you're in a lot of trouble, and I know you're in a lot of trouble.	n
person 1	すごい！楽器に精通していそうですね。音楽以外では何か他に趣味とかあるんですか？	What else do you have on your music?	n
person 2	他には趣味はないんですが、秋の紅葉が好きでよく見に行きます。夕暮れ時が特に懐かしく感じられてよいんですよ。	I don't have any other hobby, but when I go to the fall, I like the season, especially when I see the leaves.	n
person 1	へえ、自然鑑賞もまた風流な感じがしますね。わたしは栃木に実家があるんですが、栃木の秋の紅葉は美しいですよ。	Well, I feel natural, even though I have a family in the trees again, the leaves of the trees are in the autumn.	n
person 2	栃木の紅葉、見に行ったことがあります！実は、群馬出身なんですよ。	I've been to see the red leaves, actually, and I'm from the crowd.	n
person 1	そうなんですね！すぐ近県ですね。わたしも群馬県に行ったことあります。	Yes, I went to Shinjuku as soon as I had a chance.	n
person 2	今度機会があったら、一緒に紅葉を観に行けたらよいですね。	If I had a chance, I'd go see the red leaves with you.	n
