# Supplementary material
Source: ML conference proceedings conference paper supplement (https://aclanthology.org/2022.eval4nlp-1.9)
Supplement: SupplementaryMaterial [file 0016.xlsx]

## Sheet: Sheet1
person	source	translation	evaluation: is this a good translation?
person 1	こんにちは、最近趣味のネットサーフィンにはまってるんですが、何かハマっているものはありますか？	Hi there, I've been going on the internet a lot as a hobby recently, is there anything that you're currently into?	n
person 2	こんにちは。わたしは、音楽鑑賞が趣味なので、毎日音楽を聴いています。	Hello, my hobby is listening to music, and I listen to music every day.	y
person 1	音楽鑑賞も楽しいですよね！わたしはドラックストアの店員なんですが、遅刻魔なもので、よく遅刻しては怒られてます。	Oh, listening to music is fun, too! I work at a drugstore, but I'm always late, and I often get told off because of it.	n
person 2	音楽好きが極まって、楽器メーカーに勤務しています。ドラッグストア、お仕事大変そうなので寝坊するのもわかる気がします。	I'm a music lover to the point that I even work at a musical instrument manufacturer. Working at a drugstore seems like a hard job, so I can perfectly understand if you oversleep.	y
person 1	すごい！楽器に精通していそうですね。音楽以外では何か他に趣味とかあるんですか？	Amazing! You must be knowledgeable about musical instruments, then. Do you have any other hobbies other than music?	n
person 2	他には趣味はないんですが、秋の紅葉が好きでよく見に行きます。夕暮れ時が特に懐かしく感じられてよいんですよ。	I don't have any other hobbies, but I love the autumn foliage, so I often visit places where I can see the leaves. It's especially good at sunset, this feeling of nostalgia comes over me.	n
person 1	へえ、自然鑑賞もまた風流な感じがしますね。わたしは栃木に実家があるんですが、栃木の秋の紅葉は美しいですよ。	Wow, appreciating nature is another example of your refined tastes. My parental home is in Tochigi, and the autumn leaves there are really pretty.	y
person 2	栃木の紅葉、見に行ったことがあります！実は、群馬出身なんですよ。	Yes, I've been to see the autumn leaves in Tochigi! I'm actually from Gunma myself.	n
person 1	そうなんですね！すぐ近県ですね。わたしも群馬県に行ったことあります。	Oh really? That's the next prefecture over. I've been to Gunma prefecture before.	n
person 2	今度機会があったら、一緒に紅葉を観に行けたらよいですね。	If we get the opportunity, it would be nice to go and see the autumn foliage together.	y
