# Supplementary material
Source: ML conference proceedings conference paper supplement (https://aclanthology.org/2022.eval4nlp-1.9)
Supplement: SupplementaryMaterial [file 0017.xlsx]

## Sheet: Sheet1
person	source	translation	evaluation: is this a good translation?
person 1	こんにちは。お元気ですか？	Hello, how are you?	y
person 2	こんにちは、最近出身の埼玉から東京に引っ越しました。	Hi, I've just moved to Tokyo from my hometown of Saitama.	y
person 1	そうなんですね。わたしは実家のある群馬に暮らしています。	Oh, is that so. I live in Gunma, where I grew up.	n
person 2	地元は落ち着くし、道に迷わないので、安心ですよね。地図が読めず、方向音痴なので、いつもスマホ片手に出歩いでいます。	That must be tranquil because you feel at ease in your hometown, and know your way around. I'm not good at reading maps and have a bad sense of direction, so I always have my smartphone out in one hand when I'm out and about.	n
person 1	そうなんですね。今は、スマホもとても便利ですよね。	I know what you mean, smartphones today are extremely useful.	y
person 2	そうですね、わたしは東京で暮らしているものの、就活中なんですが、何をされている方なんですか？	Yes. So, I'm living in Tokyo, but I'm job hunting at the moment, what do you do?	n
person 1	就活、がんばってくださいね！わたしは音楽鑑賞が趣味なので、楽器メーカーで働いているんです。	I hope the job hunt goes well! My hobby is listening to music, so I work at a musical instrument manufacturer.	y
person 2	いいですね、わたしも音楽大好きです。群馬の暮らしは快適ですか？	That's cool, I love music, too. Is it nice living in Gunma?	y
person 1	音楽いいですよね。音楽の秋に生まれたので、母がよく音楽を胎教で聞かせてくれていたらしいです。群馬も、自然いっぱいでいいですよ。	Music is good, isn't it? I was born in autumn, which is a great time to listen to music, so apparently my mum often played music in antenatal training. Gunma's good, there's a lot of nature here.	y
person 2	へえ、埼玉も東京に比べると自然がいっぱいありますが、夏生れの割に雷が苦手で、都会の方が雷が発生する率が少なくて安心しています。	Huh, well Saitama has a lot of nature compared with Tokyo. The thing is, even though I was born in the summer, I don't like thunderstorms, so I like the city because they occur less frequently here.	n
person 1	住む地域によって、雷の発生具合も違うんですね！勉強になりました。	What, so the amount of thunderstorms that occur is different depending on the area you live in? I've learnt something new today.	n
person 2	田舎の方が遮るものがない分、怖く感じるからかもしれません。	Perhaps it feels scarier in the countryside because there's nothing to block the lightning.	y
