# Supplementary material
Source: ML conference proceedings conference paper supplement (https://aclanthology.org/2022.eval4nlp-1.9)
Supplement: SupplementaryMaterial [file 0017.xlsx]

## Sheet: Sheet1
person	source	translation	evaluation: is this a good translation?
person 1	こんにちは。お元気ですか？	Hello. How are you?	y
person 2	こんにちは、最近出身の埼玉から東京に引っ越しました。	Hi, I've just moved from Tokyo recently.	n
person 1	そうなんですね。わたしは実家のある群馬に暮らしています。	Yeah, I live in a banquet in my parents' house.	n
person 2	地元は落ち着くし、道に迷わないので、安心ですよね。地図が読めず、方向音痴なので、いつもスマホ片手に出歩いでいます。	The local will calm down, so I can't read the map, so I can't read the map, so I can't read the map.	n
person 1	そうなんですね。今は、スマホもとても便利ですよね。	Well, now it's very convenient.	n
person 2	そうですね、わたしは東京で暮らしているものの、就活中なんですが、何をされている方なんですか？	Yes, I live in Tokyo, but what do you do?	n
person 1	就活、がんばってくださいね！わたしは音楽鑑賞が趣味なので、楽器メーカーで働いているんです。	I work for the music maker!	n
person 2	いいですね、わたしも音楽大好きです。群馬の暮らしは快適ですか？	All right, I love music horses too.	n
person 1	音楽いいですよね。音楽の秋に生まれたので、母がよく音楽を胎教で聞かせてくれていたらしいです。群馬も、自然いっぱいでいいですよ。	It's a good music, because my mother used to listen to the music in the fall of the music.	n
person 2	へえ、埼玉も東京に比べると自然がいっぱいありますが、夏生れの割に雷が苦手で、都会の方が雷が発生する率が少なくて安心しています。	Well, at least there's a lot of flavings in Tokyo that make me feel more healthy in the summer.	n
person 1	住む地域によって、雷の発生具合も違うんですね！勉強になりました。	You've learned the difference between life and lightning!	n
person 2	田舎の方が遮るものがない分、怖く感じるからかもしれません。	There may be a lot of fear in the country, but I can feel it.	n
