# Supplementary material
Source: ML conference proceedings conference paper supplement (https://aclanthology.org/2022.eval4nlp-1.9)
Supplement: SupplementaryMaterial [file 0018.xlsx]

## Sheet: Sheet1
person	source	translation	evaluation: is this a good translation?
person 1	こんにちは、お元気していましたか？	Hello, are you keeping well?	y
person 2	はい、元気にしています。今、看護師を目指して千葉の看護学校に通っています。	Yes, I am, thanks. I'm currently attending a nursing college in Chiba with the aim of becoming a nurse.	y
person 1	すごいですね、頑張ってくださいね！わたしは地元埼玉から、引っ越して東京で暮らしています。	Oh, that's great! Do your best. I've recently moved away from my hometown of Saitama, and I'm living in Tokyo now.	y
person 2	東京ですか！時々遊びに行っています。看護師目指しているのに、実は注射苦手なのがネックです。	Tokyo? I go out in Tokyo sometimes. Even though I'm studying to be a nurse, the problem is I'm afraid of needles.	y
person 1	看護師さんでもやはり注射が苦手な方がいるのですね。わたしは田舎出身の夏生れですが、雷が苦手なたちです。	Oh, so even among nurses, there are some people who don't like needles. Well, I'm from a rural area, but I don't like thunderstorms.	y
person 2	そういうこと、ありますよね。ちなみに趣味がヨガなのですが、何か趣味ありますか？	Well I guess that's not uncommon. By the way, I do yoga as a pastime, what are your hobbies?	y
person 1	ヨガもやってみたいですね。特にこれと言って趣味はないのですが、地図がちゃんと読めなくて、方向音痴の割に、街歩きが好きなんです。	Oh yeah? I'd like to try yoga someday. There's not one particular thing that I would say is my hobby, but I do like walking around the city, even though I can't read maps properly and I have a bad sense of direction.	n
person 2	わたしも方向音痴なので、気持ちわかります。	I also have no sense of direction, so I can sympathise.	n
person 1	ですよね、なかなか道は覚えられません。お休みの日なんかは何をされているんですか？	I know, right. I just can't seem to be able to remember the way. What do you do in your free time?	n
person 2	休みの日は、友達と出かけたりしています。今度、わたしの誕生日のバレンタインデーに、ディズニーへいきます。	I go out with my friends on my days off. Next time, we'll be going to Disneyland for my birthday, which is also Valentine's Day.	y
