# Supplementary material
Source: ML conference proceedings conference paper supplement (https://aclanthology.org/2022.eval4nlp-1.9)
Supplement: SupplementaryMaterial [file 0018.xlsx]

## Sheet: Sheet1
person	source	translation	evaluation: is this a good translation?
person 1	こんにちは、お元気していましたか？	Hello, how are you?	y
person 2	はい、元気にしています。今、看護師を目指して千葉の看護学校に通っています。	I'm fine now. I'm going to take the nurse to Chiba school for a little while.	n
person 1	すごいですね、頑張ってくださいね！わたしは地元埼玉から、引っ越して東京で暮らしています。	Well, good luck with that. I live in Tokyo.	n
person 2	東京ですか！時々遊びに行っています。看護師目指しているのに、実は注射苦手なのがネックです。	I'm going to Tokyo sometimes, and I'm not good enough to be a nurse to be a doctor.	n
person 1	看護師さんでもやはり注射が苦手な方がいるのですね。わたしは田舎出身の夏生れですが、雷が苦手なたちです。	But I'm not good at being a nurse, and I'm not good enough to be a doctor, because we're in the middle of summer.	n
person 2	そういうこと、ありますよね。ちなみに趣味がヨガなのですが、何か趣味ありますか？	Do you have any hobby of any kind?	n
person 1	ヨガもやってみたいですね。特にこれと言って趣味はないのですが、地図がちゃんと読めなくて、方向音痴の割に、街歩きが好きなんです。	I'd like to try too, but I don't like to read this map, especially if I can't read it to the city.	n
person 2	わたしも方向音痴なので、気持ちわかります。	I understand.	n
person 1	ですよね、なかなか道は覚えられません。お休みの日なんかは何をされているんですか？	Well, I can't remember the hard way, but what are you doing for the rest of the day?	n
person 2	休みの日は、友達と出かけたりしています。今度、わたしの誕生日のバレンタインデーに、ディズニーへいきます。	I'm leaving with my friends, and I'm going to spend the next day with my birthday to valentino and my birthday.	n
