# Supplementary material
Source: ML conference proceedings conference paper supplement (https://aclanthology.org/2022.eval4nlp-1.9)
Supplement: SupplementaryMaterial [file 0019.xlsx]

## Sheet: Sheet1
person	source	translation	evaluation: is this a good translation?
person 1	こんにちは。私は、看護師を目指して学校に通っています。あなたは何のお仕事をされていますか？	Hello, I'm attending college with the aim of becoming a nurse. What kind of job do you have?	y
person 2	わたしは救急救命士です。けっこう力のいる仕事で、だからほらこの腕、それなりに筋肉質な感じでしょう？	I'm a paramedic. It's a job that requires a fair amount of strength, so,look at my arms, do you see they're fairly muscular?	y
person 1	救急救命士さんなんですね！同じ医療関係のお仕事ですね。	Oh, you're a paramedic! So we're in the same medical profession.	y
person 2	そうですね。お互い医療関係は最近は特に忙しいですよね。ご趣味は？	That's right. I think everyone in the medical community is pretty busy, particularly recently. Do you have any hobbies?	n
person 1	忙しいですね。私の趣味は、ヨガなんです。あなたは？	Yeah, it's pretty hectic. My hobby is yoga. What about you?	y
person 2	ヨガ、いいですね。わたしはこれといったものはないですが、筋トレはかかしていないかも。	Yoga? That's cool. I don't have anything that I would call a hobby, but I guess I never skip a weight training session in the gym.	y
person 1	筋トレ、お仕事的にもとても重要ですよね！私は、看護師目指してるのに、注射が苦手だったりします。何か苦手なことはありますか？	I guess weight training is also very important for your job! Even though I'm studying to be a nurse, I don't like needles. Do you have anything like that, that you don't really like?	n
person 2	苦手なものならあります。甘いものが苦手です。だからなのか、あまり女性にはもてなくて、今彼女募集中です。	Yeah, there are some things that I don't like. For instance, I don't like sweets. And, perhaps because of that, I'm not very popular with the ladies, although I am looking for a girlfriend.	y
person 1	そうなんですね、私も看護師の勉強忙しくて、彼氏いないです。	Oh right. I'm also too busy studying to be a nurse to have a boyfriend.	y
person 2	いい看護士さんになるべく頑張っているんですね。そういえば、ご出身はどちらですか？あまりなまりもないから都会かな？	Sounds like you're working hard to become a good nurse. By the way, where are you from? You don't really seem to have an accent, so I'm guessing the Tokyo area?	y
person 1	私は千葉県の出身で、そのまま千葉の学校に通っています。	I'm originally from Chiba, and I still attend a college there.	y
person 2	わたしは横浜出身です。でも、見た目がさわやかでないから、誰にもそう思われていないです。	I'm from Yokohama. But no one believes me, because I don't have that natural look.	n
person 1	横浜、いいですね。時々遊びに行きますよ。	Yokohama's nice, I go there occasionally.	n
person 2	ほんとですか？お勧めのところとかあるので、今度いらした時にご紹介しますよ。	Oh really? I know some good places, so I can show about next time you're in town.	y
