# Supplementary material
Source: ML conference proceedings conference paper supplement (https://aclanthology.org/2022.eval4nlp-1.9)
Supplement: SupplementaryMaterial [file 0019.xlsx]

## Sheet: Sheet1
person	source	translation	evaluation: is this a good translation?
person 1	こんにちは。私は、看護師を目指して学校に通っています。あなたは何のお仕事をされていますか？	Hi, I'm going to go to school to be a nurse. What do you do?	y
person 2	わたしは救急救命士です。けっこう力のいる仕事で、だからほらこの腕、それなりに筋肉質な感じでしょう？	I'm an ambulance, so I feel good about this, right?	n
person 1	救急救命士さんなんですね！同じ医療関係のお仕事ですね。	You work with the same medical care.	n
person 2	そうですね。お互い医療関係は最近は特に忙しいですよね。ご趣味は？	Yeah, well, we've been busy lately, haven't we?	n
person 1	忙しいですね。私の趣味は、ヨガなんです。あなたは？	My hobby is busy, aren't you?	n
person 2	ヨガ、いいですね。わたしはこれといったものはないですが、筋トレはかかしていないかも。	I'm not saying this, but this may not be a Scarecrow.	n
person 1	筋トレ、お仕事的にもとても重要ですよね！私は、看護師目指してるのに、注射が苦手だったりします。何か苦手なことはありますか？	I'm very interested in being a nurse, too.	n
person 2	苦手なものならあります。甘いものが苦手です。だからなのか、あまり女性にはもてなくて、今彼女募集中です。	So she's not very good at what she needs right now.	n
person 1	そうなんですね、私も看護師の勉強忙しくて、彼氏いないです。	Yeah, well, I'm a nurse, too, and I'm busy studying.	n
person 2	いい看護士さんになるべく頑張っているんですね。そういえば、ご出身はどちらですか？あまりなまりもないから都会かな？	So, as far as the good nurse, which city do you come from, then?	n
person 1	私は千葉県の出身で、そのまま千葉の学校に通っています。	I'm going to the school of a thousand leaves from Chiba State.	n
person 2	わたしは横浜出身です。でも、見た目がさわやかでないから、誰にもそう思われていないです。	I'm from the beach, but I don't think anyone's looking so well.	n
person 1	横浜、いいですね。時々遊びに行きますよ。	It's nice to go to the beach sometimes.	n
person 2	ほんとですか？お勧めのところとかあるので、今度いらした時にご紹介しますよ。	I'd like to introduce you to me if you'd like.	n
