# Supplementary material
Source: ML conference proceedings conference paper supplement (https://aclanthology.org/2022.eval4nlp-1.9)
Supplement: SupplementaryMaterial [file 0020.xlsx]

## Sheet: Sheet1
person	source	translation	evaluation: is this a good translation?
person 1	こんにちは。わたしは横浜出身で、今は救急救命士をしています。あなたは？	Hi, I'm from the eastern beach now, and you're a paramedic?	n
person 2	救命士さんなんですね！わたしは、助産師をしています。	You're a paramedic, I'm helping a support worker!	n
person 1	助産師さんですか。お忙しいでしょう。	Are you busy?	n
person 2	たぶん、あなたのほうが忙しいと思います。最近、お産も少ないですから。	Maybe you're a little busy lately.	n
person 1	そうですね、でも慣れました。疲れた時って甘いものを食べる人が多いって言いますけど、何を食べますか？わたしは甘いものが苦手で、何がいいか模索中。	Yes, but when I'm tired, people say I'm too tired to eat something sweet and sweet.	n
person 2	甘いもの、わたしは好きですが、気分転換には好きなカラオケに行きます。	I like changing things.	n
person 1	なるほど、カラオケ。歌うとスッキリしますもんね。	Well, I'll sing Caracas and I'll be fine.	n
person 2	そうなんですよ。とてもいい気分転換になるので、ぜひ試してみてください。	Yes, I'm sure you'll like to change your mind.	n
person 1	はい、今度行ってみようかな。今彼女募集中なので、はやりの1人カラオケというやつで。	Yes, let's go now, because she's one of her recruitants, and now she's on her way to the festival.	n
person 2	ヒトカラ、流行ってますし十分楽しめますよ。ちなみに、私はひな祭りの日に生まれたんです。	I've had enough fun with the humans, and I've been born for a long time.	n
person 1	そうなんですね。お雛祭りの時だなんて、なんかいいですね。何より忘れない。	Well, it's a good time for you to forget.	n
person 2	でも早生まれなので、小さい頃は勉強に中々ついていけなくて、困りました。	But when I was a young man, I had to learn to follow.	n
