# Supplementary material
Source: ML conference proceedings conference paper supplement (https://aclanthology.org/2022.eval4nlp-1.9)
Supplement: SupplementaryMaterial [file 0020.xlsx]

## Sheet: Sheet1
person	source	translation	evaluation: is this a good translation?
person 1	こんにちは。わたしは横浜出身で、今は救急救命士をしています。あなたは？	Hi, I'm from Yokohama, and I now work as a paramedic. How about you?	y
person 2	救命士さんなんですね！わたしは、助産師をしています。	Oh wow, a paramedic! I am a midwife.	y
person 1	助産師さんですか。お忙しいでしょう。	A midwife? That must keep you busy.	n
person 2	たぶん、あなたのほうが忙しいと思います。最近、お産も少ないですから。	I think you might be busier than I am. There haven't been that many births recently.	y
person 1	そうですね、でも慣れました。疲れた時って甘いものを食べる人が多いって言いますけど、何を食べますか？わたしは甘いものが苦手で、何がいいか模索中。	Well yeah, but I'm used to it. Lots of people eat something sweet when they're tired, but what do you eat? I don't really like sweet things, so I'm looking for a good alternative.	y
person 2	甘いもの、わたしは好きですが、気分転換には好きなカラオケに行きます。	I do like sweet things, but when I want to recharge, I go to my favourite karaoke box.	y
person 1	なるほど、カラオケ。歌うとスッキリしますもんね。	I see, karaoke. I guess singing is refreshing.	y
person 2	そうなんですよ。とてもいい気分転換になるので、ぜひ試してみてください。	That’s right. It's a great way to refresh yourself, you should give it a go.	y
person 1	はい、今度行ってみようかな。今彼女募集中なので、はやりの1人カラオケというやつで。	Yeah, maybe I'll try it out next time.I'm not dating anyone now, so I'd be doing karaoke by myself, which is all the rage these days.	y
person 2	ヒトカラ、流行ってますし十分楽しめますよ。ちなみに、私はひな祭りの日に生まれたんです。	Yeah, going to karaoke on your own is popular right now, and it's still pretty fun. Incidentally, I was born on the day of the Girl's Festival.	n
person 1	そうなんですね。お雛祭りの時だなんて、なんかいいですね。何より忘れない。	Oh right. That's nice to have it on the Girl's Festival, it's unforgettable.	y
person 2	でも早生まれなので、小さい頃は勉強に中々ついていけなくて、困りました。	But being born then meant I was the youngest in my class, and it was difficult because I couldn't keep up with the other kids.	y
