# Supplementary material
Source: ML conference proceedings conference paper supplement (https://aclanthology.org/2022.eval4nlp-1.9)
Supplement: SupplementaryMaterial [file 0021.xlsx]

## Sheet: Sheet1
person	source	translation	evaluation: is this a good translation?
person 1	こんにちは。お元気ですか？	Hi. How are you?	y
person 2	こんにちは！はい元気にしています。あなたは最近どうですか？	Hi. How are you today?	n
person 1	私も元気にしています。ただ、助産師の仕事をしているので、毎日忙しいことが多いです。	I'm fine, too. I just have a lot of work to do every day.	n
person 2	そうなんですね、お疲れ様です。わたしは銀行員ですが、比較的早く帰れていますよ。	Well, thank you very much, ma'am. I'm going home quickly.	n
person 1	定時で帰れるのは、良いですね。疲れたら気分転換にカラオケに行きますが、あなたはどうですか？	How about you go back to Karamanoglu when you're tired?	n
person 2	カラオケはストレス発散になりますよね。楽しいんですが、断るのが苦手な性質なので、朝まで飲み会につき合ってしまったりします。	Well, Karabanoglu is going to be a bit of a stress, but I don't like having a drink until morning.	n
person 1	誘いを断るのは、私も苦手ですよ。困りますよね。	I'm not going to ask you to do that.	n
person 2	そうですね、カラオケもいいですが、趣味はゲームで、特にオセロゲームが得意なんです。	Yeah, but Karaboudjan's good at playing games, especially with the taste of games.	n
person 1	ゲームはやらないのですが、やり始めたら楽しそうですよね。	I don't play games, but you enjoy it when you get started.	y
person 2	楽しいですね、最近石川県に転勤してきて、寒いので家に籠ってゲームばかりしています。あなたは休みの日とかカラオケ以外で何かしてますか？	It's been a long day since you've been working in the stone river, and you've been working at the country for the rest of your life, except for the weather?	n
person 1	私は富山県に嫁いできたんですよ。なので、カラオケ以外だと北海道の実家とラインでやりとりしたりしています。	What about my wife and I have been at the Caribbean together in Olafa?	n
person 2	へえ、近県ですね。いつかカラオケご一緒しましょう。	Well, someday we'll be together in Karachi.	n
