# Supplementary material
Source: ML conference proceedings conference paper supplement (https://aclanthology.org/2022.eval4nlp-1.9)
Supplement: SupplementaryMaterial [file 0021.xlsx]

## Sheet: Sheet1
person	source	translation	evaluation: is this a good translation?
person 1	こんにちは。お元気ですか？	Hello, how are you?	y
person 2	こんにちは！はい元気にしています。あなたは最近どうですか？	Hi! I'm fine, thanks. How've you been recently?	y
person 1	私も元気にしています。ただ、助産師の仕事をしているので、毎日忙しいことが多いです。	I'm doing good too, thanks. However, I'm often busy at work as a midwife.	n
person 2	そうなんですね、お疲れ様です。わたしは銀行員ですが、比較的早く帰れていますよ。	I see, you must be tired. I work at a bank, and I'm able to go home relatively early.	y
person 1	定時で帰れるのは、良いですね。疲れたら気分転換にカラオケに行きますが、あなたはどうですか？	It's nice to be able to go home on time. When I'm tired, I like to go to karaoke to recharge, but what about you?	y
person 2	カラオケはストレス発散になりますよね。楽しいんですが、断るのが苦手な性質なので、朝まで飲み会につき合ってしまったりします。	Ah yes, karaoke is a good way to blow off steam, isn't it? It's fun, but I'm not very good at saying no to things, so I regularly end up drinking with people until the sun comes up.	y
person 1	誘いを断るのは、私も苦手ですよ。困りますよね。	I'm not good at refusing invitations, either. It's a problem.	n
person 2	そうですね、カラオケもいいですが、趣味はゲームで、特にオセロゲームが得意なんです。	I know, right. Karaoke is good, but my hobby is playing games; I'm especially good at Othello.	y
person 1	ゲームはやらないのですが、やり始めたら楽しそうですよね。	I don't play games, but it looks like it could be fun if I got into it.	n
person 2	楽しいですね、最近石川県に転勤してきて、寒いので家に籠ってゲームばかりしています。あなたは休みの日とかカラオケ以外で何かしてますか？	Yeah, games are fun. I recently transferred here to Ishikawa prefecture, and it's cold so I just stay at home and play games all the time. Do you do anything else in your free time besides karaoke?	y
person 1	私は富山県に嫁いできたんですよ。なので、カラオケ以外だと北海道の実家とラインでやりとりしたりしています。	Well, I moved to Toyama prefecture when I got married, so, when I'm not doing karaoke, I chat with my family back in Hokkaido on LINE.	n
person 2	へえ、近県ですね。いつかカラオケご一緒しましょう。	Oh, Toyama's the next prefecture over. Let's go to karaoke together sometime.	n
