# Supplementary material
Source: ML conference proceedings conference paper supplement (https://aclanthology.org/2022.eval4nlp-1.9)
Supplement: SupplementaryMaterial [file 0022.xlsx]

## Sheet: Sheet1
person	source	translation	evaluation: is this a good translation?
person 1	こんばんは、寒くなってきましたが、石川県に転勤してきて、ますます寒さが身に染みています。	Hello, I'm getting cold, but it's getting worse and more cold in the river.	n
person 2	そうですね、最近とても寒いですよね。でも私は太っているので肉布団で多少は良いですよ。	Yeah, it's been so cold lately, but I'm a little fat lately.	n
person 1	そんなに違うものですか？わたしは銀行員なんですが、断ることが苦手で、悩んでいます。	No, it's not that bad, but I'm not very good at getting into trouble.	n
person 2	運動全般苦手だし、料理好きなので中々痩せられないです。それが私の悩みですね。いつもはどのような誘いがあるのですか？	I don't like it all the time, so how does it always bother you that I always ask you to cook?	n
person 1	そうですね、よく営業の人たちに飲み会に誘われるのがつらいところです。	Well, it's hard to ask people to have a drink at the shop.	n
person 2	飲み会ですか。それは大変そうですね。私はソーシャルワーカーなので、滅多に飲み会なくて逆に寂しいです。	It's hard to drink, 'cause I miss the social worker.	n
person 1	そうですか、羨ましいです。本当はインドア派なので、家でケームをしていたいですね。	Well, I'd be very lucky to have a door in the cashier.	n
person 2	ゲーム、わたしも好きでよくやりますよ。インドア派なのは、一緒ですね。	I like games too, but I like the door door door with you.	n
person 1	そうですか、オセロも得意なんですが、今度やりませんか？	Well, I'm very good at Oharo too, but can we do this now?	n
person 2	そうですね。ぜひご一緒したいです！カレー作りが得意なので、特製カレーをご馳走しますよ。	Yes, we'd like to join you, but we're going to have a curry curry curry.	n
