# Supplementary material
Source: ML conference proceedings conference paper supplement (https://aclanthology.org/2022.eval4nlp-1.9)
Supplement: SupplementaryMaterial [file 0022.xlsx]

## Sheet: Sheet1
person	source	translation	evaluation: is this a good translation?
person 1	こんばんは、寒くなってきましたが、石川県に転勤してきて、ますます寒さが身に染みています。	Good evening, it's been getting colder, and since I recently transferred to Ishikawa prefecture, the cold really cuts through me.	n
person 2	そうですね、最近とても寒いですよね。でも私は太っているので肉布団で多少は良いですよ。	Yeah, it's been very cold these past few days. But, I've put on some weight, so the blubber offers some protection.	y
person 1	そんなに違うものですか？わたしは銀行員なんですが、断ることが苦手で、悩んでいます。	Is there really that much difference? Anyway, I work at a bank. I'm not very good at saying no to people, which is a concern.	y
person 2	運動全般苦手だし、料理好きなので中々痩せられないです。それが私の悩みですね。いつもはどのような誘いがあるのですか？	Well, I'm not good at exercise of any kind, and I love to cook, so I find it hard to lose weight. That's what I'm concerned about. What sort of things do people usually invite you to?	n
person 1	そうですね、よく営業の人たちに飲み会に誘われるのがつらいところです。	Well, it's always pretty rough when the people from the sales department invite me to go drinking with them.	n
person 2	飲み会ですか。それは大変そうですね。私はソーシャルワーカーなので、滅多に飲み会なくて逆に寂しいです。	Ah, going out drinking? That does sound rough. Conversely, I'm a social worker so I rarely ever get to go out drinking and I'm lonely.	n
person 1	そうですか、羨ましいです。本当はインドア派なので、家でケームをしていたいですね。	Really? I envy you. I'm more of an indoorsy-type, so I'd rather stay home and play games.	y
person 2	ゲーム、わたしも好きでよくやりますよ。インドア派なのは、一緒ですね。	I also like games, I play them quite often. Preferring the indoors is another thing that we share.	y
person 1	そうですか、オセロも得意なんですが、今度やりませんか？	Oh really, well, I'm pretty good at Othello, would you like to play sometime?	y
person 2	そうですね。ぜひご一緒したいです！カレー作りが得意なので、特製カレーをご馳走しますよ。	That sounds nice, yeah, definitely! I'm good at making curry, so I'll treat you to a special curry.	n
