# Supplementary material
Source: ML conference proceedings conference paper supplement (https://aclanthology.org/2022.eval4nlp-1.9)
Supplement: SupplementaryMaterial [file 0023.xlsx]

## Sheet: Sheet1
person	source	translation	evaluation: is this a good translation?
person 1	お久しぶりです。お元気でしたか？	It's been a while. How are you?	y
person 2	お久しぶりです！最近ホームヘルパーに転職したので、ちょっと疲れ気味です。あなたは？	It's been a while, so you're a little tired lately, aren't you?	n
person 1	そうなんですね。私はソーシャルワーカーをしているので、似た職種ですね。	Yeah, well, I'm a social worker, so I'm a little unemployed.	n
person 2	そうですか、奇遇ですね。趣味は将棋なんですが、趣味まで一緒ではないですよね、	Well, that's weird, but I don't have any hobby until I get back together.	n
person 1	残念ながら、私の趣味は料理をすることなんです。	Unfortunately, my taste is to cook.	n
person 2	へえ、料理が上手なんて尊敬しますよ。時間ある時は何をしているんですか？	Well, I respect your cooking. What are you doing when you have time to cook?	n
person 1	私は将棋できないので、やってみたいです。料理以外は、最近太ってるので苦手な運動を始めました。	I can't. I'm just starting to feel fat lately, but I'm starting to get fat.	n
person 2	運動は体にいいのでやるべきですね。わたしは筋トレが日課なので、胸板が厚いんですよ。	The exercise should be nice, because I'm tired of the day's work.	n
person 1	筋トレですか！運動全般が基本的にダメなので、今度教えてもらいたいです。	I'd like to tell you the truth, if you don't mind.	n
person 2	ぜひ、わたしでよければ！山梨の方言が好きなんですが、富士山の側の湖湖畔などで、サイクリングや運動をすがすがしくやりたいですね。	Well, I like to talk about mountains but I like to work outside the lake of Manchuria.	n
person 1	なるほど。それもいいですね！屋内での仕事が多いので、外に出てリフレッシュしたいです。	Well, that's a lot of work I'd like to do, too.	n
person 2	ですね、リフレッシュして明日からもお仕事頑張りましょう。	Let's do our job tomorrow.	n
