# Supplementary material
Source: ML conference proceedings conference paper supplement (https://aclanthology.org/2022.eval4nlp-1.9)
Supplement: SupplementaryMaterial [file 0023.xlsx]

## Sheet: Sheet1
person	source	translation	evaluation: is this a good translation?
person 1	お久しぶりです。お元気でしたか？	Long time, no see, how have you been?	y
person 2	お久しぶりです！最近ホームヘルパーに転職したので、ちょっと疲れ気味です。あなたは？	I know, it's been too long! I recently had a career change and became a home care provider, so I'm a little tired. How about you?	y
person 1	そうなんですね。私はソーシャルワーカーをしているので、似た職種ですね。	Oh okay, well I'm a social worker, so it's a similar type of occupation.	y
person 2	そうですか、奇遇ですね。趣味は将棋なんですが、趣味まで一緒ではないですよね、	Oh yeah, what a coincidence. My hobby is shogi, but I guess our hobbies are not the same, right?	y
person 1	残念ながら、私の趣味は料理をすることなんです。	Unfortunately not: my hobby is cooking.	y
person 2	へえ、料理が上手なんて尊敬しますよ。時間ある時は何をしているんですか？	Wow, I have admiration for people who are good at cooking. What do you do in your free time?	y
person 1	私は将棋できないので、やってみたいです。料理以外は、最近太ってるので苦手な運動を始めました。	I don't know how to play shogi, but I'd like to give it a try. Aside from cooking, I've started exercising recently, which I despise, because I've put on weight.	n
person 2	運動は体にいいのでやるべきですね。わたしは筋トレが日課なので、胸板が厚いんですよ。	You should exercise, because it's good for you. I do a daily weight training routine, and my chest muscles are really bulging.	y
person 1	筋トレですか！運動全般が基本的にダメなので、今度教えてもらいたいです。	Weight training?! I'm basically useless at all forms of exercise, so I'd love it if you could give me some pointers sometime.	n
person 2	ぜひ、わたしでよければ！山梨の方言が好きなんですが、富士山の側の湖湖畔などで、サイクリングや運動をすがすがしくやりたいですね。	Yeah, no worries, if you'll let me. I like the dialect people speak in Yamanashi, and I'd love to cycle and exercise on the shores of the lakes of Mount Fuji, I bet it's so refreshing.	n
person 1	なるほど。それもいいですね！屋内での仕事が多いので、外に出てリフレッシュしたいです。	That sounds good too! I work indoors a lot, so I'd like to get out to refresh myself.	y
person 2	ですね、リフレッシュして明日からもお仕事頑張りましょう。	Right, well, let's get refreshed in preparation for work tomorrow.	y
