# Supplementary material
Source: ML conference proceedings conference paper supplement (https://aclanthology.org/2022.eval4nlp-1.9)
Supplement: SupplementaryMaterial [file 0024.xlsx]

## Sheet: Sheet1
person	source	translation	evaluation: is this a good translation?
person 1	こんにちは、わたしは誕生日が七夕なんですが、いつ頃誕生日なんでしたっけ？	Hi, my birthday is on the day of the Tanabata Star Festival, when's yours?	n
person 2	こんにちは。七夕、ロマンチックですね！私はクリスマスイブです。	Hello. Tanabata? That's romantic. My birthday is on Christmas Eve.	y
person 1	クリスマスもまたロマンチックで！最近は何をされているんですか？	Christmas is romantic,too! What have you been up to recently?	y
person 2	誕生日とイブのお祝いが一緒で、昔は嫌でしたが今は嬉しいですね。最近は、薬剤師の仕事を始めました。	I used to despise the fact that my birthday and Christmas were celebrated together, but now I'm glad. I recently started working as a pharmacist.	y
person 1	薬剤師をされてたんですね、わたしはホームヘルパーなので、お世話になることがあるかもしれません。	Oh, you're a pharmacist? Well I'm a home helper, so I may need to enlist your services sometime in the future.	y
person 2	そうなんですね！ヘルパーさんも、色々な人のお世話で大変ではないですか？	That's true! Isn't it difficult looking after all the people under your care?	y
person 1	そうですね、体力を使うので体を鍛えていたら、胸板が厚くなりました。	Well yeah, but because I have to use my physical strength, I trained up for it, and now my chest muscles are bulging.	y
person 2	それは素晴らしいですね。私も生まれてからずっと長野なので、雪かき得意なんです。なので、腕の力には自信があります。	Oh, that's good. I've lived in Nagano all my life, so I'm good at shovelling snow and I'm pretty confident that I've got strong arms.	y
person 1	長野なんですか、私は山梨出身で、やはり地元の方言を聴くと落ち着きますよね。	Oh, you're from Nagano? I'm from Yamanashi, and whenever I hear someone speaking the local dialect, a feeling of calm comes over me.	y
person 2	隣県にお住まいだったんですね！山梨は、よく観光で行ったりしますよ。	Oh, so you live in the next prefecture over! I often go sightseeing in Yamanashi.	n
