# Supplementary material
Source: ML conference proceedings conference paper supplement (https://aclanthology.org/2022.eval4nlp-1.9)
Supplement: SupplementaryMaterial [file 0024.xlsx]

## Sheet: Sheet1
person	source	translation	evaluation: is this a good translation?
person 1	こんにちは、わたしは誕生日が七夕なんですが、いつ頃誕生日なんでしたっけ？	Hi, I'm having dinner, but when was the 7th birthday?	n
person 2	こんにちは。七夕、ロマンチックですね！私はクリスマスイブです。	Hello, I'm Christmas Eve!	n
person 1	クリスマスもまたロマンチックで！最近は何をされているんですか？	What have you done with Christmas again?	n
person 2	誕生日とイブのお祝いが一緒で、昔は嫌でしたが今は嬉しいですね。最近は、薬剤師の仕事を始めました。	I'm glad I started working with my birthday and Eve recently, but I'm glad you started working with the pharmacy.	n
person 1	薬剤師をされてたんですね、わたしはホームヘルパーなので、お世話になることがあるかもしれません。	Well, I may have been a herb, so I might be able to take care of some herbal herbs.	n
person 2	そうなんですね！ヘルパーさんも、色々な人のお世話で大変ではないですか？	Oh, yeah, well, aren't you in trouble, Mr. Parley?	n
person 1	そうですね、体力を使うので体を鍛えていたら、胸板が厚くなりました。	Well, if I was a strong man, I'd be very proud of my body.	n
person 2	それは素晴らしいですね。私も生まれてからずっと長野なので、雪かき得意なんです。なので、腕の力には自信があります。	It's wonderful because I've been born too long, so I've been very good at snowflashing my arms.	n
person 1	長野なんですか、私は山梨出身で、やはり地元の方言を聴くと落ち着きますよね。	I'm a long way from home, and I'm still listening to local territory.	n
person 2	隣県にお住まいだったんですね！山梨は、よく観光で行ったりしますよ。	I used to live next to the city, and I'm going to a tour tour in the mountains.	n
