# Supplementary material
Source: ML conference proceedings conference paper supplement (https://aclanthology.org/2022.eval4nlp-1.9)
Supplement: SupplementaryMaterial [file 0025.xlsx]

## Sheet: Sheet1
person	source	translation	evaluation: is this a good translation?
person 1	こんにちは。お元気ですか？	Hi. How are you?	y
person 2	ええ！今は事務の仕事をしながら元気にしています！あなたは？	I'm doing my job right now. How are you?	n
person 1	私も元気にしていますよ。ただ、薬剤師の仕事がハードなので少し疲れています。	I'm fine, I'm just a little tired for the pharmacy work.	n
person 2	薬剤師って神経を使いそうですものね。わたしは疲れた時は、趣味のDIYを楽しんだりしています。あなたもちゃんとストレス発散してますか？	I enjoy the stress when I'm tired, too?	n
person 1	そうなんですよね。DIY、できるなんて尊敬します。私は中々ストレス発散できていません。	I can't imagine how much stress I have in New York.	n
person 2	あら、それはいけないわ。よかったら今度頭皮マッサージしてさしあげましょうか？昔美容師になりたかったので、練習してたんですよ。	Oh, that's not gonna happen. I was hoping you'd be a masseuse again.	n
person 1	それはぜひ、やっていただきたいですね。長野育ちなので雪かきは得意なんですが、どうも最近体力が落ちてきてるので。	I've been very good at it for a long time, but I'm very good at it.	n
person 2	長野の雪はすごそうですね！わたし岐阜に引っ越したばかりなんですが、雪かきが大変だったらどうしようかとヒヤヒヤしてます。いつか雪かきのコツを教えてください！	The long snow has just moved into a great snow, but if I had to tell you what to do with the snow, I'll tell you what to do!	n
person 1	岐阜ならお隣の県ですよね。その年によって、ひどく雪が積もりますよ。またコツをお教えしましょう。	I'll teach you the worst trick in the next year.	n
person 2	わあ、助かります！手先は器用な方なんですが、お手柔らかにお願いしますね！	Thank you very much, very much!	n
