# Supplementary material
Source: ML conference proceedings conference paper supplement (https://aclanthology.org/2022.eval4nlp-1.9)
Supplement: SupplementaryMaterial [file 0025.xlsx]

## Sheet: Sheet1
person	source	translation	evaluation: is this a good translation?
person 1	こんにちは。お元気ですか？	Hi, you doing good?	n
person 2	ええ！今は事務の仕事をしながら元気にしています！あなたは？	Yes! I'm working at an office and I'm doing great! How about you?	y
person 1	私も元気にしていますよ。ただ、薬剤師の仕事がハードなので少し疲れています。	Yeah, I'm good too, thanks, though I'm a little tired because my job as a pharmacist is tough.	y
person 2	薬剤師って神経を使いそうですものね。わたしは疲れた時は、趣味のDIYを楽しんだりしています。あなたもちゃんとストレス発散してますか？	A pharmacist seems like a job where you need to be precise. When I'm tired, I like to dabble in a little DIY. Are you also making sure to do things that relieve stress?	y
person 1	そうなんですよね。DIY、できるなんて尊敬します。私は中々ストレス発散できていません。	That's true. I'm impressed that you can do DIY. I find it hard to blow off steam.	y
person 2	あら、それはいけないわ。よかったら今度頭皮マッサージしてさしあげましょうか？昔美容師になりたかったので、練習してたんですよ。	Oh, that's no good. Would you like me to give you a head massage sometime? I used to want to be a beautician, so I learned how to do them.	n
person 1	それはぜひ、やっていただきたいですね。長野育ちなので雪かきは得意なんですが、どうも最近体力が落ちてきてるので。	I'd love that. Having grown up in Nagano, I'm good at shovelling snow, but recently I've been feeling somewhat weak.	y
person 2	長野の雪はすごそうですね！わたし岐阜に引っ越したばかりなんですが、雪かきが大変だったらどうしようかとヒヤヒヤしてます。いつか雪かきのコツを教えてください！	Nagano seems like it gets a lot of snow. I just moved to Gifu, and I'm worried because I don't know what I'll do, if it's hard to clear the snow. Please give me some tips on snow shovelling one day!	y
person 1	岐阜ならお隣の県ですよね。その年によって、ひどく雪が積もりますよ。またコツをお教えしましょう。	Gifu is the neighbouring prefecture, isn't it? Sometimes we get really deep snow, depending on the year. I can give you some pointers.	n
person 2	わあ、助かります！手先は器用な方なんですが、お手柔らかにお願いしますね！	Thanks, that would be a big help! I'm good with my hands, but please go easy on me!	n
