# Supplementary material
Source: ML conference proceedings conference paper supplement (https://aclanthology.org/2022.eval4nlp-1.9)
Supplement: SupplementaryMaterial [file 0026.xlsx]

## Sheet: Sheet1
person	source	translation	evaluation: is this a good translation?
person 1	こんにちは！わたしは今趣味のDIYにハマっているのだけど、あなたもなにかハマっていることとかあります？	Hi! I'm currently into DIY as a hobby, but what are you into?	y
person 2	DIYなんて、すごいじゃないですか！私は滋賀で開業医を営んでいますが、趣味はゴルフですね。	DIY? That's amazing! I run a private clinic in Shiga, and my hobby is golf.	y
person 1	まぁ、お仕事にスポーツに、充実した毎日を過ごされていらっしゃるご様子ですね！	What with your job and sports, it sounds like your days are fulfilling!	n
person 2	そうですね、充実はしています。あなたも充実していますか？	I guess they are fulfilling. Are you fulfilled?	y
person 1	うらやましい！わたしは事務職に就いているんですが、毎日同じことの繰り返して少し退屈してるんです。	No, I'm jealous. I have an office job, and I'm a little bored having to do the same thing day in, day out.	y
person 2	医者も同じようなものですよ。お互い、気分転換が必要ですね。	Well, it's the same for me as a doctor, you know. That's why it's important for us to take a break now and again.	y
person 1	ええ、そうですね。ゴルフなんてちょっと憧れてしまうけど、どうです？やっぱり難しいですか？	Yes, that's true. I'm kind of attracted by golf, but what's it like? I imagine it's difficult?	y
person 2	そんなことないですよ。やってみると、案外簡単なものです。ただ、良い成績を取ろうと思うと、練習はたくさんせねばですけどね。	That's not true. It's surprisingly easy once you try it. However, if you want to get a good score, then you do have to practice a lot.	y
person 1	何事にも練習は必要ですね。でも手先は器用な方なので、頑張って挑戦してみようかしら！	Well, everything needs practice. I'm pretty good with my hands though, so maybe I'll give it a go!	n
person 2	そうなんですね。きっとやってみたらいいですよ。まあ、私は運転が苦手なので、運転を練習したいと思ってます。	Yes, it's definitely worth giving it a try. I'm not a very good driver, so I want to practice driving.	y
