# Supplementary material
Source: ML conference proceedings conference paper supplement (https://aclanthology.org/2022.eval4nlp-1.9)
Supplement: SupplementaryMaterial [file 0026.xlsx]

## Sheet: Sheet1
person	source	translation	evaluation: is this a good translation?
person 1	こんにちは！わたしは今趣味のDIYにハマっているのだけど、あなたもなにかハマっていることとかあります？	Hello, I'm in New York now, but do you have any idea what you're up to?	n
person 2	DIYなんて、すごいじゃないですか！私は滋賀で開業医を営んでいますが、趣味はゴルフですね。	I'm a great teacher, and I'm a golf teacher!	n
person 1	まぁ、お仕事にスポーツに、充実した毎日を過ごされていらっしゃるご様子ですね！	Well, you've been working at sports every day!	n
person 2	そうですね、充実はしています。あなたも充実していますか？	Well, are you really the same?	n
person 1	うらやましい！わたしは事務職に就いているんですが、毎日同じことの繰り返して少し退屈してるんです。	I'm getting a little bored about the same thing every day.	n
person 2	医者も同じようなものですよ。お互い、気分転換が必要ですね。	So is the doctor. We need to change our minds.	y
person 1	ええ、そうですね。ゴルフなんてちょっと憧れてしまうけど、どうです？やっぱり難しいですか？	Yeah, well, how hard can it be to love golf?	n
person 2	そんなことないですよ。やってみると、案外簡単なものです。ただ、良い成績を取ろうと思うと、練習はたくさんせねばですけどね。	That's not true, but I think it's a simple thing to do, just to practice a lot of good grades.	n
person 1	何事にも練習は必要ですね。でも手先は器用な方なので、頑張って挑戦してみようかしら！	Let's do what we have to do, but let's try harder!	n
person 2	そうなんですね。きっとやってみたらいいですよ。まあ、私は運転が苦手なので、運転を練習したいと思ってます。	Yeah, I'd like to train if you tried, but I'm not good at training.	n
