# Supplementary material
Source: ML conference proceedings conference paper supplement (https://aclanthology.org/2022.eval4nlp-1.9)
Supplement: SupplementaryMaterial [file 0027.xlsx]

## Sheet: Sheet1
person	source	translation	evaluation: is this a good translation?
person 1	こんにちは。私はゴルフが得意ですが、あなたは得意なことがありますか？	Hello, I'm good at golf, but have you ever been good at golf?	n
person 2	わたしはテニスが好きです。もともと運動は好きな方なので、大体のスポーツはいけます。	I like tennis before, especially for sports.	n
person 1	そうなんですね！とても健康的でいいですね。	Well, that's very healthy.	n
person 2	スポーツ好きが高じて、スポーツ観戦が趣味です。あなたの趣味は？	I like sports and sports. What's your hobby?	n
person 1	そうなんですね。私は開業医で忙しいので、今のところ趣味はゴルフくらいなんです。	Well, I'm busy with the opening doctor, so I'm much more of a golf fan right now.	n
person 2	なるほど、お医者様なら忙しいですよね。わたしはマッサージ師をしているので、まだお医者さまよりは時間があるほうなのかも。	Well, if you're a doctor, I might still have more time with a doctor than I am.	n
person 1	仕事的には、通ずるところがありますね。ドライブでもして遠くまで行けたらいいのですが、運転は苦手なんですよ。	I don't think I can drive too far until I drive a car.	n
person 2	そうなんですね。わたしも運転はしません。移動は電車です。	Well, I'm not driving either.	n
person 1	その点は、同じですね。わたしも自転車か、電車ですね。でも最近は出かけられていないんですよ。	That's the same thing, but I haven't been out for a while.	n
person 2	お忙しそうですが、体には気を付けてくださいね。あ、お医者様に言う言葉ではないですね。	You're busy, but don't tell the doctor that.	n
person 1	いえいえ、医者って案外自分の体のことは、見落としがちだったりするんですよ。ありがとうございます。	No, no, no, no, no, no, no, no, no, no, no, no, no, no, no, no, no, no, no, no, no, no, no, no, no, no, no, no, no, no, no, no, no, no, no, no, no, no, no, no, no, no, no, no, no, no, no, no, no, no, no, no, no, no, no, no, no, no, no, no, no, no, no, no, no, no, no, no, no, no, no, no, no, no, no, no, no, no, no, no, no, no, no, no, no, no.	n
person 2	いえいえ、また時間ある時にお話し付き合ってください。	no, no, no, no, no, no, no, no, no.	n
