# Supplementary material
Source: ML conference proceedings conference paper supplement (https://aclanthology.org/2022.eval4nlp-1.9)
Supplement: SupplementaryMaterial [file 0027.xlsx]

## Sheet: Sheet1
person	source	translation	evaluation: is this a good translation?
person 1	こんにちは。私はゴルフが得意ですが、あなたは得意なことがありますか？	Hello, I'm pretty good at golf, but what are you good at?	y
person 2	わたしはテニスが好きです。もともと運動は好きな方なので、大体のスポーツはいけます。	I like tennis. I've always liked exercising, so I'm pretty good at most sports.	y
person 1	そうなんですね！とても健康的でいいですね。	I see! That's good because it's very healthy.	y
person 2	スポーツ好きが高じて、スポーツ観戦が趣味です。あなたの趣味は？	Since I like playing sports, my hobby is watching sports. What are your hobbies?	y
person 1	そうなんですね。私は開業医で忙しいので、今のところ趣味はゴルフくらいなんです。	Oh right. Well, I'm pretty busy as a practitioner, so currently golf is about the only hobby I have.	n
person 2	なるほど、お医者様なら忙しいですよね。わたしはマッサージ師をしているので、まだお医者さまよりは時間があるほうなのかも。	Oh I see, I guess you would be busy if you're a doctor. I'm a masseuse, so perhaps I have a little more free time than you.	n
person 1	仕事的には、通ずるところがありますね。ドライブでもして遠くまで行けたらいいのですが、運転は苦手なんですよ。	Our jobs share some things in common, then. I wish I could go on a long drive to a place far away, but I'm not very good at driving.	y
person 2	そうなんですね。わたしも運転はしません。移動は電車です。	Oh right, I don't drive either. I get around by train.	y
person 1	その点は、同じですね。わたしも自転車か、電車ですね。でも最近は出かけられていないんですよ。	I'm the same. I also get around by train, or bicycle. Although I haven't been able to get out recently.	n
person 2	お忙しそうですが、体には気を付けてくださいね。あ、お医者様に言う言葉ではないですね。	You sound busy, but please make sure to take care of your health. Oh, I guess I shouldn't be saying that to a doctor.	n
person 1	いえいえ、医者って案外自分の体のことは、見落としがちだったりするんですよ。ありがとうございます。	No no, it's true, doctors tend to overlook their own health. Thank you for your concern.	n
person 2	いえいえ、また時間ある時にお話し付き合ってください。	Not at all, let's chat again when you have the time.	n
