# Supplementary material
Source: ML conference proceedings conference paper supplement (https://aclanthology.org/2022.eval4nlp-1.9)
Supplement: SupplementaryMaterial [file 0028.xlsx]

## Sheet: Sheet1
person	source	translation	evaluation: is this a good translation?
person 1	こんにちは。初めまして。わたしはマッサージ師をしています。あなたは？	Hi. How are you? I'm a massage surgeon.	n
person 2	こんにちは。私は、獣医をしています。	Hello. I'm a veteran.	n
person 1	獣医さんなんですね。やっぱり動物はお好きなんですか？	You're a veteran. Do you like animals?	n
person 2	そうなんですよ。小動物も好きですが、実は馬が好きで。乗馬もしています。	Yeah, well, I like small animals, but I like horses and horses, too.	n
person 1	馬は優しい目をしていていいですよね。わたしは運動が好きで、その中でテニスが好きです。スポーツ観戦は趣味の1つです。ほとんど運動のことしか頭にない感じです。	The horses must be very kind to me, because I like sports and I like sports.	n
person 2	とてもスポーツが好きなんですね！私は乗馬くらいなんですが、足が長いので合っていると言われます。他に、自分に合うスポーツがあればよいのですが。	I like sports so much, so much as I like my foot so much!	n
person 1	足が長いということは、背も高いのでしょうか？であれば、バレーボールは向いていますよ。実は学生時代はバレーボール部の主将を務めてもいたんですよ。	A long time ago, when your foot is too tall for a ball ball, you'll have to teach me how to play ball ball ball.	n
person 2	はい、背も高いです。バレーボール、今度教えてもらおうかな。	Yes, sir. And now you're tall.	n
person 1	いいですよ、たまにやるのは。大人になってもつい本気を出してしまいます。	All right, I'll get used to it. I'll get used to it.	n
person 2	本気になってスポーツできるのは、いいことです。乗馬は乗っているだけですからね。	It's good to be able to sports, because I'm just riding.	n
person 1	そんなことないですよ。乗馬は下半身の筋肉バランスがしっかりしていないと難しいと聞いたことがあります。れっきとしたスポーツじゃないですか。	No, I've heard that a horse can't handle half of your muscles tomorrow.	n
person 2	確かに。ただ疲れもたまっているので、今度マッサージもしていただきたいです。	I'm really tired of sports, too.	n
