# Supplementary material
Source: ML conference proceedings conference paper supplement (https://aclanthology.org/2022.eval4nlp-1.9)
Supplement: SupplementaryMaterial [file 0028.xlsx]

## Sheet: Sheet1
person	source	translation	evaluation: is this a good translation?
person 1	こんにちは。初めまして。わたしはマッサージ師をしています。あなたは？	Hello, nice to meet you. I'm a masseuse, how about you?	y
person 2	こんにちは。私は、獣医をしています。	Hello, I'm a vet.	y
person 1	獣医さんなんですね。やっぱり動物はお好きなんですか？	Oh, a vet? You must like animals.	n
person 2	そうなんですよ。小動物も好きですが、実は馬が好きで。乗馬もしています。	That's right. I like small animals, but I like horses most of all, and I go horse riding.	y
person 1	馬は優しい目をしていていいですよね。わたしは運動が好きで、その中でテニスが好きです。スポーツ観戦は趣味の1つです。ほとんど運動のことしか頭にない感じです。	Horses are nice, they have kind eyes. I like to exercise, and I particularly like playing tennis. One of my hobbies is watching sports. It feels like exercise is all I think about.	y
person 2	とてもスポーツが好きなんですね！私は乗馬くらいなんですが、足が長いので合っていると言われます。他に、自分に合うスポーツがあればよいのですが。	You really like sports! Horse riding is about the only thing I do, but they say it suits me because I have long legs. I wish there were other sports that suited me.	y
person 1	足が長いということは、背も高いのでしょうか？であれば、バレーボールは向いていますよ。実は学生時代はバレーボール部の主将を務めてもいたんですよ。	If you have long legs, that means you're tall, right? In which case, volleyball would be suitable. I was actually the captain of the volleyball team when I was a student.	n
person 2	はい、背も高いです。バレーボール、今度教えてもらおうかな。	Yes, I am tall. Perhaps I'll get you to teach me volleyball next time.	y
person 1	いいですよ、たまにやるのは。大人になってもつい本気を出してしまいます。	Sure thing, it's good to play from time to time. Even as an adult, I get really into it.	y
person 2	本気になってスポーツできるのは、いいことです。乗馬は乗っているだけですからね。	That's good to have a sport that you can really get into. With horse riding, all you do is sit on the horse.	y
person 1	そんなことないですよ。乗馬は下半身の筋肉バランスがしっかりしていないと難しいと聞いたことがあります。れっきとしたスポーツじゃないですか。	That's not true. I've heard that riding is difficult if you don't have good balance in the muscles of your lower body. Doesn't that mean it counts as a proper sport?	n
person 2	確かに。ただ疲れもたまっているので、今度マッサージもしていただきたいです。	That's true. I'm pretty worn out though, so I'd appreciate it if you could give me a massage sometime.	y
