# Supplementary material
Source: ML conference proceedings conference paper supplement (https://aclanthology.org/2022.eval4nlp-1.9)
Supplement: SupplementaryMaterial [file 0029.xlsx]

## Sheet: Sheet1
person	source	translation	evaluation: is this a good translation?
person 1	はじめまして。私は三重県の県庁所在地に住んでいる獣医です。	Nice to meet you. I'm a veteran doctor living in the 30s.	n
person 2	こんにちは。わたしは心理カウンセラーです	Hello. I'm a psychologist.	n
person 1	そうなんですね。動物も心を病んでいる時があるから、いつかアドバイスいただいても良いですか？	Well, I suppose there are times when animals are sick, so can I ask you some advice?	n
person 2	はい、もちろんどうぞ。	Yes, of course.	y
person 1	ありがとうございます。ちなみに私は閉所恐怖症なのですが、今度相談してもよいですか？	Thank you, sir, but I'm a claustrophobic. Can I talk to you this time?	n
person 2	はい、そちらもお待ちしていますね。さて、一つ気になっていることがあるんですが。	Yes, you're waiting for one thing, too.	n
person 1	え、なんでしょうか？	What can I do for you?	y
person 2	わたしの故郷は静岡なんですが、だからというわけなのか、よく好きで飲むのは緑茶なんです。あなたは三重県に住んでいらっしゃいますが、やはり伊勢エビとかをよく食べるとか？	My home is Shizuoka, but do you think you'll be able to live in Ise Shikoku often?	n
person 1	静岡はお茶、有名ですよね。三重は、伊勢えびとか松坂牛とか有名ですが、高級で中々食べれないんですよ。	Ise of Ise and Taka are very famous, aren't they, by Ise?	n
person 2	そうなんですね。いつも出身地の名産を必ず食べたり飲んだりするイメージを持たれていて気になりまして。地元だからといって、高級なものは無理ですよね。	Well, I always thought it would be a local thing to eat from the land to drink a certain name.	n
person 1	ですね、でも地元の津ぎょうざとかは普通に食べたりしますよ。名物の種類によりますよね。	But local Tsugumokame eat more than normal species.	n
person 2	なるほどそうなんですね。津餃子気になります。今度作り方を教えてください。	I see. I'll teach you this again.	n
