# Supplementary material
Source: ML conference proceedings conference paper supplement (https://aclanthology.org/2022.eval4nlp-1.9)
Supplement: SupplementaryMaterial [file 0029.xlsx]

## Sheet: Sheet1
person	source	translation	evaluation: is this a good translation?
person 1	はじめまして。私は三重県の県庁所在地に住んでいる獣医です。	Hi, nice to meet you. I'm a vet, and I live in the prefectural capital of Mie prefecture.	n
person 2	こんにちは。わたしは心理カウンセラーです	Hi, I'm a psychological counselor.	y
person 1	そうなんですね。動物も心を病んでいる時があるから、いつかアドバイスいただいても良いですか？	Oh right. Animals can also be in emotional pain, so would you mind if I ask you for some advice sometime?	y
person 2	はい、もちろんどうぞ。	Not at all.	y
person 1	ありがとうございます。ちなみに私は閉所恐怖症なのですが、今度相談してもよいですか？	Thank you very much. Incidentally, I have claustrophobia so can I speak to you about that next time?	y
person 2	はい、そちらもお待ちしていますね。さて、一つ気になっていることがあるんですが。	Yes, I look forward to discussing that with you, too. Right, there is something I'm curious about, though.	y
person 1	え、なんでしょうか？	Oh yes, what's that?	y
person 2	わたしの故郷は静岡なんですが、だからというわけなのか、よく好きで飲むのは緑茶なんです。あなたは三重県に住んでいらっしゃいますが、やはり伊勢エビとかをよく食べるとか？	My hometown is in Shizuoka, and I think that's perhaps why I often enjoy a cup of green tea. Since you live in Mie prefecture, do you often eat lobster?	y
person 1	静岡はお茶、有名ですよね。三重は、伊勢えびとか松坂牛とか有名ですが、高級で中々食べれないんですよ。	Shizuoka's famous for green tea, isn't it? Mie is famous for lobster, as well as Matsuzaka beef, but they're expensive luxuries, so I hardly ever eat them.	n
person 2	そうなんですね。いつも出身地の名産を必ず食べたり飲んだりするイメージを持たれていて気になりまして。地元だからといって、高級なものは無理ですよね。	Oh right. I wondered because people always imagine that I eat and drank local produce. But, just because you're local, that doesn't mean you're all buying these luxury delicacies, then.	n
person 1	ですね、でも地元の津ぎょうざとかは普通に食べたりしますよ。名物の種類によりますよね。	Well yes, but I do normally eat stuff like Tsu gyoza dumplings. It depends on what kind of local specialty it is.	y
person 2	なるほどそうなんですね。津餃子気になります。今度作り方を教えてください。	Oh right, I guess that's true. I'm interested in Tsu gyoza dumplings. You'll have to tell me how to make them sometime.	y
