# Supplementary material
Source: ML conference proceedings conference paper supplement (https://aclanthology.org/2022.eval4nlp-1.9)
Supplement: SupplementaryMaterial [file 0030.xlsx]

## Sheet: Sheet1
person	source	translation	evaluation: is this a good translation?
person 1	こんにちは。最近寒いね。わたしは故郷が静岡だから、どうも寒いのが苦手。	Hi, it's been cold lately, hasn't it? I'm originally from Shizuoka, so I can't handle the cold weather.	y
person 2	こんにちは。寒すぎですね。わたしは徳島なので、まだいいほうだとは思うけど。	Hello, yeah, it's really cold, isn't it. Although, I'm from Tokushima, so I think I'm still alright.	y
person 1	徳島なんだ。暖かいイメージだけど、寒さに強いのかな？こうも寒いと、よく緑茶を飲むよ。もちろん温かいやつ。	Oh, Tokushima? I always had the impression that it's a warm place, but you're resilient to the cold? I always drink green tea when it's cold. Hot tea, of course.	n
person 2	緑茶は体があったまっていいね！わたしは趣味がアウトドアだから、テント生活とかで鍛えられてるのかも。	Ah yes, green tea is good, because it's warming! I'm quite outdoorsy, so perhaps I've trained myself against the cold by sleeping in a tent or other stuff.	y
person 1	アウトドアが趣味なんだ。いいね！わたしは水泳が得意で、季節関係なく、時々プールに泳ぎに行くよ。あなたはアウトドア以外に好きなことってある？	Oh, you like the outdoors? That's cool! I like swimming, and I go to the pool from time to time whatever the season. What do you like other than the outdoors?	y
person 2	ドライブも好きだよ！人混みは嫌いだから、自然がいっぱいあるところによく行くんだ。	I always enjoy going for a drive! I hate crowded places, so I often escape to the countryside.	y
person 1	うんうん、それってすごく体にも心にもいいと思う。実はわたし心理カウンセラーをやっているんだけど、あなたのやっていること理にかなってるよ。	Uh-huh, I think that's good for both the mind and the body. I'm actually a psychological counselor, and I think what you're doing makes sense.	n
person 2	そうなんだ、それは良かった！カウンセラーって、すごいね。	Oh really? That's good then! So you're a counselor, that's amazing.	y
person 1	そうかな。でも人の気持ちを考えるのっておもしろい。あなたは何をされているの？	You think so? But, it is interesting to try to understand other people's emotions. What do you do?	y
person 2	わたしは、キャリアコンサルタントをしているよ。その人に合った仕事を紹介してるんだ。その意味では、少し似通ったところあるね。	I'm a career consultant. I match people with the jobs that suit them. So, I guess our jobs are kind of similar in that regard.	y
person 1	そうなんだ。確かに似てるね。もし心理カウンセラーをやめたら、わたしもキャリアコンサルタントとしてやっていけるかな？	Oh right. Yeah, I guess they are similar. If I quit my job as a psychological counselor, I wonder if I could also become a career consultant.	y
person 2	そうだね、心理学の知識もあれば、より活躍できると思うよ！	Well, yeah, I think you'd do well, especially with your expertise in psychology!	y
