# Supplementary material
Source: ML conference proceedings conference paper supplement (https://aclanthology.org/2022.eval4nlp-1.9)
Supplement: SupplementaryMaterial [file 0030.xlsx]

## Sheet: Sheet1
person	source	translation	evaluation: is this a good translation?
person 1	こんにちは。最近寒いね。わたしは故郷が静岡だから、どうも寒いのが苦手。	Hello, it's been a long time since I'm home from Shizuoka.	n
person 2	こんにちは。寒すぎですね。わたしは徳島なので、まだいいほうだとは思うけど。	Hello, it's too cold. I think I should still be on the island.	n
person 1	徳島なんだ。暖かいイメージだけど、寒さに強いのかな？こうも寒いと、よく緑茶を飲むよ。もちろん温かいやつ。	It's a warm island, but it's so cold, it's cold and cold, and it's cold, and it's cold, and it's warm, and it's warm, and it's warm, and it's warm and warm.	n
person 2	緑茶は体があったまっていいね！わたしは趣味がアウトドアだから、テント生活とかで鍛えられてるのかも。	It's nice to have a cup of tea, but it's nice to have a cat in my tent.	n
person 1	アウトドアが趣味なんだ。いいね！わたしは水泳が得意で、季節関係なく、時々プールに泳ぎに行くよ。あなたはアウトドア以外に好きなことってある？	You know, sometimes I like the door door, but sometimes I'm good at swimming, and I'm good at swimming in the swimming room.	n
person 2	ドライブも好きだよ！人混みは嫌いだから、自然がいっぱいあるところによく行くんだ。	I love driving too much, so I'm going to go where I want to go.	n
person 1	うんうん、それってすごく体にも心にもいいと思う。実はわたし心理カウンセラーをやっているんだけど、あなたのやっていること理にかなってるよ。	Yeah, I think that's really good for my body, actually, actually, but I think I'm doing a psychologist for you.	n
person 2	そうなんだ、それは良かった！カウンセラーって、すごいね。	Well, that's a good idea, doctor!	n
person 1	そうかな。でも人の気持ちを考えるのっておもしろい。あなたは何をされているの？	Well, that's interesting, but what are you doing with people's feelings?	n
person 2	わたしは、キャリアコンサルタントをしているよ。その人に合った仕事を紹介してるんだ。その意味では、少し似通ったところあるね。	I'm a consultant, that means I've met that guy who works a little bit.	n
person 1	そうなんだ。確かに似てるね。もし心理カウンセラーをやめたら、わたしもキャリアコンサルタントとしてやっていけるかな？	If I'm a consultant, I'm a consultant, too.	n
person 2	そうだね、心理学の知識もあれば、より活躍できると思うよ！	Well, I think you can do better than studying psychology!	n
