# Supplementary material
Source: ML conference proceedings conference paper supplement (https://aclanthology.org/2022.eval4nlp-1.9)
Supplement: SupplementaryMaterial [file 0031.xlsx]

## Sheet: Sheet1
person	source	translation	evaluation: is this a good translation?
person 1	こんにちは！いやあ、徳島に移住してきて本当に正解だった！いいところだね、徳島は。	Hi! I tell you, I made the right choice in moving to Tokushima! It's beautiful here in Tokushima.	y
person 2	そうなの？わたしずっと大阪在住で徳島って行ったことないんだけど阿波踊りのイメージしかないな。	Really? I've lived in Osaka all my life and I've never been to Tokushima; the only thing that springs to mind when I think of it is the Awa Odori Festival.	y
person 1	いや、都会に比べて、全然人が少ないんだよ。それが何よりもいいところだね！	Well, there are hardly any people at all when compared to a big city. That's the best thing about it!	n
person 2	なるほど。それはいいかも。わたしは翻訳家なので都会の喧騒よりは落ち着いた場所で仕事をしたいしね。あなたは最近お仕事は？	I see. That might be nice. I'm a translator, so I'd prefer to work in a quiet place than the hustle and bustle of the city. How's your work been recently?	y
person 1	仕事は順調だよ。わたしがキャリアコンサルしたクライアントが、メキメキ成功しだしてるんだ！	Things are going well. A client for whom I acted as career consultant is rapidly showing signs of success!	y
person 2	それは順調だね！今度うちに来た時は大したことないけどわたしの得意料理のたこ焼きでパーティーでもしよう！	That's great! Next time you come round, let's have a takoyaki party! I can't do much, but I'm really good at making takoyaki.	n
person 1	たこパー、いいね！たこ焼き好きってことは、関西出身だったりして！	A takoyaki party sounds good! If you like takoyaki, then would you be from the Kansai region by any chance?!	n
person 2	ずーっと関西だよ、あなたは元々の出身はどこなの？	Yes, I've lived in Kansai my whole life, where are you from originally?	n
person 1	わたしは関東出身で徳島に移住したの。でも関西人って、ソースの味の違いが分かるってホント？	I'm originally from the Kanto region before moving to Tokushima. Is it really true that people from Kansai can tell the difference in flavour of different brands of Worcestershire sauce?	n
person 2	むしろわからないの？関西人には当たり前のことだよ	Conversely, are saying you can't tell the difference? It's second nature for people from Kansai.	n
person 1	そうなんだー！文化の違いを感じる！今度、わたしのドライブに付き合ってよ！関西の話、聞かせて！	No way! I can feel the difference in the culture! Come on a drive with me sometime, I want to hear more about Kansai!	n
person 2	行こう行こう！わたしの話は長いわよー	Yeah, let's go! I have a lot to tell you.	y
