# Supplementary material
Source: ML conference proceedings conference paper supplement (https://aclanthology.org/2022.eval4nlp-1.9)
Supplement: SupplementaryMaterial [file 0031.xlsx]

## Sheet: Sheet1
person	source	translation	evaluation: is this a good translation?
person 1	こんにちは！いやあ、徳島に移住してきて本当に正解だった！いいところだね、徳島は。	Well, that was a really good place for you to live on the island, isn't it?	n
person 2	そうなの？わたしずっと大阪在住で徳島って行ったことないんだけど阿波踊りのイメージしかないな。	I've been dancing all my life in the middle of nowhere, and I've been dancing with a bunch of stupid eyes.	n
person 1	いや、都会に比べて、全然人が少ないんだよ。それが何よりもいいところだね！	No, there's not a lot of people in the city, and that's a good place for it!	n
person 2	なるほど。それはいいかも。わたしは翻訳家なので都会の喧騒よりは落ち着いた場所で仕事をしたいしね。あなたは最近お仕事は？	Well, that's good because I'm doing more work in the city than I'm supposed to be able to translate.	n
person 1	仕事は順調だよ。わたしがキャリアコンサルしたクライアントが、メキメキ成功しだしてるんだ！	I've done my job, Meyer. My client's doing well!	n
person 2	それは順調だね！今度うちに来た時は大したことないけどわたしの得意料理のたこ焼きでパーティーでもしよう！	It's good to see you again, but it's not much of a big deal. Let's have some of my cooking party!	n
person 1	たこパー、いいね！たこ焼き好きってことは、関西出身だったりして！	Parley, that's what I like to burn from the west!	n
person 2	ずーっと関西だよ、あなたは元々の出身はどこなの？	Where you from?	n
person 1	わたしは関東出身で徳島に移住したの。でも関西人って、ソースの味の違いが分かるってホント？	Do you know what the difference is that I moved to Uganda Island in Uganda?	n
person 2	むしろわからないの？関西人には当たり前のことだよ	Do you really don't know the difference between people in the West?	n
person 1	そうなんだー！文化の違いを感じる！今度、わたしのドライブに付き合ってよ！関西の話、聞かせて！	I can feel the difference between the culture and the west!	n
person 2	行こう行こう！わたしの話は長いわよー	Let's go! Long story for me!	n
