# Supplementary material
Source: ML conference proceedings conference paper supplement (https://aclanthology.org/2022.eval4nlp-1.9)
Supplement: SupplementaryMaterial [file 0032.xlsx]

## Sheet: Sheet1
person	source	translation	evaluation: is this a good translation?
person 1	おはよう。ねえ、わたしまた覚えた百人一首の数が増えたの！	Morning. Hey, I've remembered even more of the 100 Hyakunin Isshu verses!	y
person 2	すごい！百人一首なんてやってるの？	Wow! Do you play the Hyakunin Isshu card game?	y
person 1	百人一首というより、わたし暗記が得意だから何か自慢できることが欲しくて。あなたは特技とかある？	Well, it's less about the Hyakunin Isshu, it's more that I'm good at memorising things, and I wanted something to show off about. Do you have any special skills?	n
person 2	特技は語学って言えるかなあ。通訳を仕事にしてて、海外旅行にもよく行くよ。	I guess I could say that language learning is my special skill. I work as an interpreter and often travel abroad.	y
person 1	かっこいいなー！わたしはずっと大阪在住で関空も近いのに海外に行ったことないんだよな。	That's so cool! I've lived in Osaka all my life and I've never been abroad, even though Kansai International Airport is not far away.	y
person 2	そうなんだ！わたしの場合、生まれも育ちも兵庫で、いま神戸にいるけど、周りは結構普通に海外行ってるよ？	I see! In my case, I was born and raised in Hyogo, and I live in Kobe now, but the people from round here usually tend to go abroad.	n
person 1	さすが神戸はおしゃれだわ。わたしは海外旅行より趣味の読書を家でできたら満足だな。	Sounds like people in Kobe are as fancy as expected. Rather than travel abroad, I'm happy if I can stay at home and indulge in my hobby of reading.	y
person 2	ああ、インドア派なんだね！わたし、家でじっとしてるのって、超苦手なんだよねー！	Ah, so you're more of an indoorsy-type! I hate just hanging around at home, you know!	n
person 1	普段休みの日とかは何することが多いの？	What do you usually do on your days off?	y
person 2	通訳の勉強のために外人さんが出入りするバーに行ったりとか、次の海外旅行の計画で友達と会ったりとか！あなたは読書だけ？	I like to do things such as go to bars frequented by foreigners to sharpen my interpreting skills, and meet up with my friends to plan our next trip abroad! Is reading your only hobby?	n
