# Supplementary material
Source: ML conference proceedings conference paper supplement (https://aclanthology.org/2022.eval4nlp-1.9)
Supplement: SupplementaryMaterial [file 0032.xlsx]

## Sheet: Sheet1
person	source	translation	evaluation: is this a good translation?
person 1	おはよう。ねえ、わたしまた覚えた百人一首の数が増えたの！	Good morning, I've lost a lot of people I remember again!	n
person 2	すごい！百人一首なんてやってるの？	Great. What are you doing?	n
person 1	百人一首というより、わたし暗記が得意だから何か自慢できることが欲しくて。あなたは特技とかある？	So I'm better than a slaver, so you want something more useful to be proud of?	n
person 2	特技は語学って言えるかなあ。通訳を仕事にしてて、海外旅行にもよく行くよ。	I'll tell you what, I'm going overseas and I'll tell you what to do.	n
person 1	かっこいいなー！わたしはずっと大阪在住で関空も近いのに海外に行ったことないんだよな。	Wow, I've been abroad for a long time.	n
person 2	そうなんだ！わたしの場合、生まれも育ちも兵庫で、いま神戸にいるけど、周りは結構普通に海外行ってるよ？	Yeah, well, I grew up in the armoury, and now I'm going overseas.	n
person 1	さすが神戸はおしゃれだわ。わたしは海外旅行より趣味の読書を家でできたら満足だな。	I'd be happier if I could read your hobby more than travel.	n
person 2	ああ、インドア派なんだね！わたし、家でじっとしてるのって、超苦手なんだよねー！	Oh, my gosh, you're an inmate of the door! I'm not so happy!	n
person 1	普段休みの日とかは何することが多いの？	What do you do for the rest of the day?	n
person 2	通訳の勉強のために外人さんが出入りするバーに行ったりとか、次の海外旅行の計画で友達と会ったりとか！あなたは読書だけ？	Mr. gringo goes into the bar to study for the next few days, and you go to the bar and read to your next friend?	n
