# Supplementary material
Source: ML conference proceedings conference paper supplement (https://aclanthology.org/2022.eval4nlp-1.9)
Supplement: SupplementaryMaterial [file 0033.xlsx]

## Sheet: Sheet1
person	source	translation	evaluation: is this a good translation?
person 1	このコロナ、いつ落ち着くんだろうね－。	This Colina, when will I calm down because I've never known anyone in my entire life, because I've never been so good at it before?	n
person 2	ほんとだよ。わたしはもともと人付き合いが苦手だからそんなに苦じゃないけどあなたにとってはステイホームって辛いんじゃない？	I really don't like people like me, but it's not that hard for you to be home, is it?	n
person 1	辛いね！なにが辛いって、海外旅行が出来ないこと！いつになったら、行けるようになるんだろう？	It's hard to travel away when you can't travel away!	n
person 2	しばらく無理だろうね。海外旅行好きだよね。わたしは古本屋が好きだから馴染みの古本屋さえ潰れなければいいかな。	I don't think I like to travel abroad for a while, so even if I don't like old explorers.	n
person 1	本好きなんだね！知識も豊富そうで羨ましいなあ。	I love books too, but I envy them!	n
person 2	知識が増えるのも嬉しいけど何より本屋の匂いが懐かしく感じられて好きなんだ。あなたも好きなものある？	I'm glad you like the smell of more knowledge, but you like it so much, don't you?	n
person 1	好きなものじゃなくて、わたしは逆にじっとしてるのが嫌いなの！海外旅行とか、とにかく動きたい派！	I don't like to stay on the other side of the island, but I don't like to move on anyway!	n
person 2	なるほどね。全然性格違うのになんでわたしたちこれだけ付き合い長いんだろうね。	Well, it's not like we've known each other for a long time.	n
person 1	ほんとだねー！あ、そうだ、旅行じゃなくて引っ越しちゃえば良いんじゃない？海外は無理でも、神戸を出て東京に行こうかなあ！	No, no, no, no, no, no, no, no, no, no, no, no, no, no, no, no, no, no, no, no, no, no, no, no, no, no, no, no, no, no, no, no, no, no, no, no, no, no, no, no, no, no, no, no, no, no, no, no, no, no, no, no, no, no, no, no, no, no, no, no, no, no, no, no, no, no, no, no, no, no, no, no, no, no, no, no, no, no, no, no, no, no, no, no, no, no, no, no, no, no, no, no, no, no, no, no, no, no, no, no.	n
person 2	東京に住みたいの？	Do you want to live in Tokyo?	y
person 1	生まれも育ちも兵庫だから、兵庫以外ならどこでも良いって感じ！オススメはある？	So, if you were born and raised, where would you like Oslo?	n
person 2	わたしが住んでる有明湾の近くはすごくおすすめ！	I live near the Gulf Bay, very close!	n
