# Supplementary material
Source: ML conference proceedings conference paper supplement (https://aclanthology.org/2022.eval4nlp-1.9)
Supplement: SupplementaryMaterial [file 0033.xlsx]

## Sheet: Sheet1
person	source	translation	evaluation: is this a good translation?
person 1	このコロナ、いつ落ち着くんだろうね－。	I wonder when this Covid pandemic will die down.	y
person 2	ほんとだよ。わたしはもともと人付き合いが苦手だからそんなに苦じゃないけどあなたにとってはステイホームって辛いんじゃない？	I know, right. I'm not great at socialising in the first place, so I don't find having to stay at home that bad, but you must be finding it tough, right?	y
person 1	辛いね！なにが辛いって、海外旅行が出来ないこと！いつになったら、行けるようになるんだろう？	Yeah, it's difficult! What's hardest is that I'm not able to travel abroad! I wonder when I'll finally be able to go?	y
person 2	しばらく無理だろうね。海外旅行好きだよね。わたしは古本屋が好きだから馴染みの古本屋さえ潰れなければいいかな。	It probably won't be possible for a while. You like travelling abroad though, don't you? I like going to second-hand bookshops, and I hope my favourite one doesn't go out of business.	y
person 1	本好きなんだね！知識も豊富そうで羨ましいなあ。	Oh, so you're a book lover! I'm jealous, because you must very knowledgeable.	n
person 2	知識が増えるのも嬉しいけど何より本屋の匂いが懐かしく感じられて好きなんだ。あなたも好きなものある？	I am of course glad to attain more knowledge, but more than anything, I like the smell of bookshops, it makes me feel nostalgic. Do you have something that you like?	n
person 1	好きなものじゃなくて、わたしは逆にじっとしてるのが嫌いなの！海外旅行とか、とにかく動きたい派！	Rather than something I like, conversely what I hate is staying still! I'm someone who wants to be constantly moving, such as travelling abroad!	n
person 2	なるほどね。全然性格違うのになんでわたしたちこれだけ付き合い長いんだろうね。	I see. I wonder why we've been friends for such a long time when we have completely different personalities.	y
person 1	ほんとだねー！あ、そうだ、旅行じゃなくて引っ越しちゃえば良いんじゃない？海外は無理でも、神戸を出て東京に行こうかなあ！	That's true! Oh, I know, what if I moved instead of travelling? Even if I can't go abroad, I could leave Kobe and go to Tokyo!	y
person 2	東京に住みたいの？	Do you want to live in Tokyo?	y
person 1	生まれも育ちも兵庫だから、兵庫以外ならどこでも良いって感じ！オススメはある？	Hyogo is where I was born and raised, so I feel like anywhere else would be good! Do you have any recommendations?	n
person 2	わたしが住んでる有明湾の近くはすごくおすすめ！	I highly recommend the area around Ariake Bay where I live!	y
