# Supplementary material
Source: ML conference proceedings conference paper supplement (https://aclanthology.org/2022.eval4nlp-1.9)
Supplement: SupplementaryMaterial [file 0034.xlsx]

## Sheet: Sheet1
person	source	translation	evaluation: is this a good translation?
person 1	最近雨が多いですね。	It's been raining a lot recently.	y
person 2	ほんとにね！建設現場で肉体労働してるので、雨が続くと仕事がおじゃんですよ。	It truly has! I do manual labour on a construction site, so if it keeps raining, I'll have no work.	y
person 1	大変ですね。わたしは農家をしてるのでたまになら嬉しいんですがこうも続くと作物に影響が出ちゃいますよ。	That's tough, eh. I'm a farmer, so I'm glad if it rains occasionally, but if this keeps up, it will impact the crops.	y
person 2	ああ、農家さんでしたか。お互い、お天道様のご機嫌と収入が連動してて辛いですなあ。	Oh, you're a farmer? It's tricky because we both do jobs where our income is linked to the unpredictability of the weather.	n
person 1	本当に。仕事にならない日はどう過ごしてらっしゃるんですか？	I'll say. What do you do on days when you're unable to work?	y
person 2	よくアニメを見てますよ。まとまった休みがとれたら、聖地巡礼ってやつをするのが楽しくてね。あなたは？	I watch a lot of anime. If I'm able to take a number of days off together, I like to go and visit the real-life locations used in the anime. How about you?	n
person 1	わたしは古本屋が好きでこんな雨の日はよく本屋へ行きます。	I like second-hand bookshops, so I'll often go to a bookshop on a rainy day like this.	y
person 2	ほほう。雨の日に本屋に行くと、なにか良いことがあるんですか？	Uh-huh. What's nice about going to a bookshop on a rainy day?	n
person 1	本屋の匂いを懐かしく感じながらゆっくりと流れる時間を過ごすんです。あなたはアニメ以外に好きなものとかあるんですか？	I like to spend a leisurely time while feeling nostalgia from the smell of the bookshop. Is there anything that you like besides anime?	n
person 2	そうですねえ。バイクに乗ってツーリングに出かけるのも結構好きです。目的地を決めず、マイペースに寄り道しながらが楽しいんですよ。	Let's see, I also quite like to go motorcycle touring. It's fun to set off without a destination in mind, and stop off at places along the way.	n
