# Supplementary material
Source: ML conference proceedings conference paper supplement (https://aclanthology.org/2022.eval4nlp-1.9)
Supplement: SupplementaryMaterial [file 0034.xlsx]

## Sheet: Sheet1
person	source	translation	evaluation: is this a good translation?
person 1	最近雨が多いですね。	There's been a lot of rain lately.	y
person 2	ほんとにね！建設現場で肉体労働してるので、雨が続くと仕事がおじゃんですよ。	I'm really working on a construction site, so the rain ends.	n
person 1	大変ですね。わたしは農家をしてるのでたまになら嬉しいんですがこうも続くと作物に影響が出ちゃいますよ。	It's hard to say I'm having a farm, but I'm glad it's going to continue to affect the crops sometimes.	n
person 2	ああ、農家さんでしたか。お互い、お天道様のご機嫌と収入が連動してて辛いですなあ。	Oh, well, how are you guys doing with the farm money?	n
person 1	本当に。仕事にならない日はどう過ごしてらっしゃるんですか？	How long has it been since you're really not working?	n
person 2	よくアニメを見てますよ。まとまった休みがとれたら、聖地巡礼ってやつをするのが楽しくてね。あなたは？	You enjoy the pilgrims when you take a good night off, and you enjoy the pilgrims?	n
person 1	わたしは古本屋が好きでこんな雨の日はよく本屋へ行きます。	I like to go to the ancient rain shop like this.	n
person 2	ほほう。雨の日に本屋に行くと、なにか良いことがあるんですか？	Do you have any good things to do when you go to the rain shop?	n
person 1	本屋の匂いを懐かしく感じながらゆっくりと流れる時間を過ごすんです。あなたはアニメ以外に好きなものとかあるんですか？	Do you have anything else you like to smell in this store that makes you feel more comfortable with the smell of a cartoon?	n
person 2	そうですねえ。バイクに乗ってツーリングに出かけるのも結構好きです。目的地を決めず、マイペースに寄り道しながらが楽しいんですよ。	Well, I don't like to go out on a bike, but I'm going out for fun while I'm gone, and I'm going out for a little bit.	n
