# Supplementary material
Source: ML conference proceedings conference paper supplement (https://aclanthology.org/2022.eval4nlp-1.9)
Supplement: SupplementaryMaterial [file 0035.xlsx]

## Sheet: Sheet1
person	source	translation	evaluation: is this a good translation?
person 1	ねえ、アニメって見る？君の名はってやつ、見た？	Hey, do you watch anime? Have you seen "Your Name"?	n
person 2	見た見た！すごく面白かったよね！あなたもアニメ好きなの？	Yes, I've seen it! It was really good, wasn't it? Do you like anime too?	n
person 1	好き！アニメも好きだし、見終わった後、ストーリーの中で使われた場所に実際に出掛けていくのも好きなんだ！	Yes! Not only do I like anime, after watching it, I also like to actually go and visit the real locations where the story is set!	y
person 2	それすごく素敵！聖地巡礼てやつね！わたしもアニメ大好きなんだけど周りの人からは夢見がちだって言われるからあまり大きな声で言えなかったの。	That sounds really wonderful! An anime pilgrimage, as they say, eh! I love anime too, but people I know say that I tend to daydream, so I've never really said it out loud.	n
person 1	たしかに夢見がちかもね！でもそれでいいじゃん！わたしなんて、普段、肉体労働してるんだし、頭の中ぐらい夢を見させてほしいわ！	I guess anime can make you daydream! But what's wrong with that?! I work a job doing manual labour, so I at least want to be able to dream!	y
person 2	そんな風に言ってもらえたの初めて。ありがとう！わたし福島から引っ越して来たからあまりこっちに友達っていなくって。よかったら今度一緒に聖地巡礼に行ってくれない？	You're the first person I've heard put it that way. Thank you! I moved here from Fukushima, so I don't have many friends here. If it's okay with you, can we visit some anime locations together some time?	y
person 1	いいよー！あ、でもわたしの足って、車じゃなくてバイクなんだけど、ツーリングでも大丈夫？	Absolutely! Ah, but I get around by motorbike not a car, would you be okay with touring?	n
person 2	こう見えてわたしもバイクに乗るのよ！あなたは鳥取砂丘に行ったことある？	I might look like this, but I ride a motorbike too! Have you ever been to the Tottori Sand Dunes?	y
person 1	行ったこと無い！あそこって、なにかアニメで使われてたっけ？	No, I've never been! Wait, have they ever been used in an anime?	y
person 2	アニメの聖地ではないんだけど、鳥取砂丘はわたしのお気に入りスポットなの。ぜひあなたと行ってみたくて。	They're not an anime location, but the Tottori Sand Dunes are one of my favourite places. I'd love to go there with you.	y
