# Supplementary material
Source: ML conference proceedings conference paper supplement (https://aclanthology.org/2022.eval4nlp-1.9)
Supplement: SupplementaryMaterial [file 0035.xlsx]

## Sheet: Sheet1
person	source	translation	evaluation: is this a good translation?
person 1	ねえ、アニメって見る？君の名はってやつ、見た？	Hey, did you see what your name is, a cartoon?	n
person 2	見た見た！すごく面白かったよね！あなたもアニメ好きなの？	You've seen so much fun. You like animals too?	n
person 1	好き！アニメも好きだし、見終わった後、ストーリーの中で使われた場所に実際に出掛けていくのも好きなんだ！	I love animals too. After I've seen them, I really like to go somewhere in the story.	n
person 2	それすごく素敵！聖地巡礼てやつね！わたしもアニメ大好きなんだけど周りの人からは夢見がちだって言われるからあまり大きな声で言えなかったの。	That's a very nice pilgrimage, because I loved animals too much, but I didn't hear much from people around!	n
person 1	たしかに夢見がちかもね！でもそれでいいじゃん！わたしなんて、普段、肉体労働してるんだし、頭の中ぐらい夢を見させてほしいわ！	Of course, I always wanted to dream about it all the time, but I always dream about it in my head!	n
person 2	そんな風に言ってもらえたの初めて。ありがとう！わたし福島から引っ越して来たからあまりこっちに友達っていなくって。よかったら今度一緒に聖地巡礼に行ってくれない？	I've never been here before, so thank you very much, because I'm not a friend of the Fuhrer's island, so if you want to come with me, you can go with me now.	n
person 1	いいよー！あ、でもわたしの足って、車じゃなくてバイクなんだけど、ツーリングでも大丈夫？	Oh, but it's not my ride, it's a bike, okay?	n
person 2	こう見えてわたしもバイクに乗るのよ！あなたは鳥取砂丘に行ったことある？	Have I ever been to the beach with you?	n
person 1	行ったこと無い！あそこって、なにかアニメで使われてたっけ？	You've never been there before, have you ever been there before?	n
person 2	アニメの聖地ではないんだけど、鳥取砂丘はわたしのお気に入りスポットなの。ぜひあなたと行ってみたくて。	It's not a sanctuary, but I'd like to see my favorite birdhouse, but I'd like to see your welcome.	n
