# Supplementary material
Source: ML conference proceedings conference paper supplement (https://aclanthology.org/2022.eval4nlp-1.9)
Supplement: SupplementaryMaterial [file 0036.xlsx]

## Sheet: Sheet1
person	source	translation	evaluation: is this a good translation?
person 1	ねえ、やっぱりわたしって身長高い方だよね？	You know, I'm taller, right?	y
person 2	んー、そう？わたしは男だから、あんまり人の身長を気にしたことがなかったけど。	- Well, I'm a man, so I never really cared about a man so tall.	n
person 1	そう言ってくれる人がいてよかった！また身長が伸びたみたいでさ。わたし目立つことが嫌いなのにこの身長のせいですごく目立ってしまってる気がする。	I'm glad someone told you that I don't like being tall again.	n
person 2	いいんじゃない？目立ってても、モデルみたいで。	Do you mind if I take a look at the models?	n
person 1	自分ではそんな風に思えないんだってば。あなたは嫌いなものとかないの？	If you don't think you don't like it yourself, you don't like it like that, do you?	n
person 2	そう言われれると、たしかにわたしも細すぎる体型がコンプレックスかもしれないなあ。	Yeah, well, I might say that too, too, but I'm pretty sure I have a transcript too.	n
person 1	あなたこそモデル体型だと思うけど。	I think you're a model.	n
person 2	いやあ、男が細いのは、カッコがつかないよ。サイクリングが好きで、ついつい食べるのを忘れて走り続けちゃうからかな。	Well, the guy's too cute to be so cool, so I'm gonna keep going and forget to eat and eat.	n
person 1	だから細いのね。わたしは福島から引っ越してきてこっちの人ってみんなスタイルがいいから驚いたわ。	That's why I'm all astonishing from the Akaibu Island.	n
person 2	みんながみんな、そうってわけでもないよ。わたしは国内旅行が好きで、自転車に乗って、島根から東北の方まで走ったりするからね！	Everyone likes to ride from the east, not to the east, because I like to ride to the coast of the island!	n
