# Supplementary material
Source: ML conference proceedings conference paper supplement (https://aclanthology.org/2022.eval4nlp-1.9)
Supplement: SupplementaryMaterial [file 0036.xlsx]

## Sheet: Sheet1
person	source	translation	evaluation: is this a good translation?
person 1	ねえ、やっぱりわたしって身長高い方だよね？	Hey, Actually, I am on the tall side, right?	y
person 2	んー、そう？わたしは男だから、あんまり人の身長を気にしたことがなかったけど。	Umm, I dunno, are you? I'm a guy, so I've never really cared about people's heights.	n
person 1	そう言ってくれる人がいてよかった！また身長が伸びたみたいでさ。わたし目立つことが嫌いなのにこの身長のせいですごく目立ってしまってる気がする。	I'm glad there's someone who thinks like that! See, I think I've grown again. I don't like standing out, but I feel conspicuous because of my height.	y
person 2	いいんじゃない？目立ってても、モデルみたいで。	That's alright, isn't it? You might stand out, but you look like a model.	y
person 1	自分ではそんな風に思えないんだってば。あなたは嫌いなものとかないの？	I don't think of it that way. Isn't there anything that you don't like?	y
person 2	そう言われれると、たしかにわたしも細すぎる体型がコンプレックスかもしれないなあ。	Well, now you mention it, guess you could say I have a bit of a complex that my physique is too slim.	n
person 1	あなたこそモデル体型だと思うけど。	I'd say it's you who has the physique of a model.	y
person 2	いやあ、男が細いのは、カッコがつかないよ。サイクリングが好きで、ついつい食べるのを忘れて走り続けちゃうからかな。	Yeah, well, it's not cool when a man is thin. I like cycling, and sometimes I'll just keep going and forget to eat.	y
person 1	だから細いのね。わたしは福島から引っ越してきてこっちの人ってみんなスタイルがいいから驚いたわ。	That's why you're thin, then. I moved here from Fukushima, and I was surprised by how in shape everyone is here.	y
person 2	みんながみんな、そうってわけでもないよ。わたしは国内旅行が好きで、自転車に乗って、島根から東北の方まで走ったりするからね！	But, it's not like everyone is in shape. In my case, I like travelling around Japan, and I'll do things like jump on my bike and ride from Shimane to Tohoku!	n
