# Supplementary material
Source: ML conference proceedings conference paper supplement (https://aclanthology.org/2022.eval4nlp-1.9)
Supplement: SupplementaryMaterial [file 0037.xlsx]

## Sheet: Sheet1
person	source	translation	evaluation: is this a good translation?
person 1	こんにちは！さっき、サイクリングして戻ってきたばかりなので、汗臭かったらスミマセン！	Hello, I just got back from a sweat ring, so if it smells like sweat...	n
person 2	いえいえ大丈夫ですよ。サイクリングは趣味ですか？	No, it's all right. Is that your favorite ring?	n
person 1	ええ、学生時代からハマってましてね。国内のあちこちを自転車でまわってるんですよ。	Yeah, it's been a while since I was a student. I've been working around the country ever since.	n
person 2	それはすごい。だからそんないすらっとしてるのね。わたしなんて見ての通りの肥満体型だからあなたを見習わなくちゃ。食事にも気をつけらっしゃるの？	That's why I have to learn to look at you as a fat man!	n
person 1	食事？いやいや、独身の男のメシなんて、適当なものが多いに決ってるじゃないですか！	No, no, no, no, no, no, no, no, no, no, no, no, no, no, no, no, no, no, no, no, no, no, no.	n
person 2	それでその体型なのね。わたし女性のわりに自炊もしないし不規則な生活をしてるからダメなのね。あと、わたしお取り寄せも好きなんだけどあなたはしたことある？		n
person 1	いやあ、したこと無いなあ。美味しかったのとか、あります？	Oh, you've never tasted good before, have you?	n
person 2	ありますよ！よかったら今度あなたにもおすそ分けしますよ！あなたは自転車以外で好きなものとかあるの？	Do you have anything else you like more than a bike?	n
person 1	おすそ分けは嬉しいな。好きなもの、、、そうだな、今住んでる島根のことは結構好きかもしれないな。	I'm glad to be able to live on the island right now, if you like it.	n
person 2	島根はいいところよね。わたしも旅行で行ったことがあるんだけど思いがけずよかった思い出があります。	The islands are good, but I'm glad I finally got there.	n
