# Supplementary material
Source: ML conference proceedings conference paper supplement (https://aclanthology.org/2022.eval4nlp-1.9)
Supplement: SupplementaryMaterial [file 0037.xlsx]

## Sheet: Sheet1
person	source	translation	evaluation: is this a good translation?
person 1	こんにちは！さっき、サイクリングして戻ってきたばかりなので、汗臭かったらスミマセン！	Hi! I've just come back from a bike ride, so I apologise if I smell sweaty!	n
person 2	いえいえ大丈夫ですよ。サイクリングは趣味ですか？	No, it's fine. Is cycling your hobby?	y
person 1	ええ、学生時代からハマってましてね。国内のあちこちを自転車でまわってるんですよ。	Yeah, I've been into cycling ever since I was a student. I cycle all around the country.	y
person 2	それはすごい。だからそんないすらっとしてるのね。わたしなんて見ての通りの肥満体型だからあなたを見習わなくちゃ。食事にも気をつけらっしゃるの？	That sounds great. So that's why you're so slim, then. As you can see, I'm pretty obese, so I'll have to follow your example. Are you also careful about your diet?	y
person 1	食事？いやいや、独身の男のメシなんて、適当なものが多いに決ってるじゃないですか！	My diet? Not at all, I'm a single guy who lives alone, so obviously a lot of my meals are just something thrown together.	n
person 2	それでその体型なのね。わたし女性のわりに自炊もしないし不規則な生活をしてるからダメなのね。あと、わたしお取り寄せも好きなんだけどあなたはしたことある？	I'm amazed you can stay in shape on that diet. Even though I'm a girl, I don't cook for myself, and I lead a disorderly life, so it's no good. Also, I like to order delivery, but have you ever ordered out?	n
person 1	いやあ、したこと無いなあ。美味しかったのとか、あります？	No, I haven't, are there actually tasty things available?	y
person 2	ありますよ！よかったら今度あなたにもおすそ分けしますよ！あなたは自転車以外で好きなものとかあるの？	Yes, there are! If you'd like, I'll share some with you some time! Do you like anything other than bikes?	y
person 1	おすそ分けは嬉しいな。好きなもの、、、そうだな、今住んでる島根のことは結構好きかもしれないな。	I'd be happy if you shared with me. Things that I like... Let's see, I guess I like where I currently live in Shimane quite a lot.	n
person 2	島根はいいところよね。わたしも旅行で行ったことがあるんだけど思いがけずよかった思い出があります。	Oh yeah, Shimane is nice, isn't it? I've been there on a trip, and I came away with some surprisingly good memories.	y
