# Supplementary material
Source: ML conference proceedings conference paper supplement (https://aclanthology.org/2022.eval4nlp-1.9)
Supplement: SupplementaryMaterial [file 0038.xlsx]

## Sheet: Sheet1
person	source	translation	evaluation: is this a good translation?
person 1	突然ですが、あなたは神を信んじますか？	Apropos of nothing, do you believe in God?	n
person 2	一応、日本人ですからね。悪いことをしたらバチが当たる、ぐらいには思ってます。あなたはどうなんです？	Well, I guess as a Japanese person, I do believe that you'll be punished if you do something bad. How about you?	y
person 1	突然ごめんなさいね。実はわたし無神論者なんです。神に助けられたと思ったこともないし。宗教の勧誘ではないので安心してください。	Sorry to ask you that all of a sudden. I'm actually an atheist. Like, I've never once thought that I've been helped by God. Don't worry, I'm not trying to proselytise or anything.	y
person 2	ああ、そうですか、正直ドキッとしましたよ。でも、そう思うようになったキッカケなど、心当たりは？	Phew, really? You gave me a bit of a shock, to be honest. But, do you have any idea as to why you came to think that way?	y
person 1	わたし昔から肥満体型なんですけど、神様仏様にどうか脂肪を落としてくださいっていくら願っても叶えてもらえてないから。もう信じるのをやめたんです。	Well, I've been obese for a long time, and even if I pray to God or the Buddha to help me shed the pounds, my prayer is never answered. So, I stopped believing.	y
person 2	たしかに、それは信じるのが嫌になりますね。わたしも食べ歩きが好きなので、スタイルが崩れるのは心配です。	That would certainly put you off believing. I also enjoy sampling the food at different restaurants, so I'm worried that I'm gonna get out of shape.	n
person 1	あなたはもっと太った方がいいくらいですよ！食べ歩きわたしも大好きです！	It would do you good to have a bit more meat on you! I also love eating out at different restaurants!	n
person 2	わたしが、不思議と食べてもスタイルをキープできているのは、猫舌でゆっくり冷ましながら食べるせいかもしれません。	I think the reason why I'm somehow able to keep in shape even though I eat a lot is because I can't handle hot food, so I eat slowly while letting it cool down.	n
person 1	それはいいことを聞きました。ゆっくり冷ましながら食べると効果があるのね。あとあなたがしていることとかぜひ教えてください。	Yeah, I've heard that's a good thing to do. So it seems that eating slowly while letting the food cool down is effective, then. Please tell me what else you do.	n
person 2	ええ、あとでね。ところで質問なんですけど、もし痩せることができたら、あなたはまた神を信じられるようになると思いますか？	Yeah, I'll tell you later. By the way, I have a question: If you were able to lose weight, do you think you would start believing in God again?	n
