# Supplementary material
Source: ML conference proceedings conference paper supplement (https://aclanthology.org/2022.eval4nlp-1.9)
Supplement: SupplementaryMaterial [file 0038.xlsx]

## Sheet: Sheet1
person	source	translation	evaluation: is this a good translation?
person 1	突然ですが、あなたは神を信んじますか？	Suddenly, do you believe in God?	n
person 2	一応、日本人ですからね。悪いことをしたらバチが当たる、ぐらいには思ってます。あなたはどうなんです？	Well, if you do anything wrong, do you think you'll get hurt by the Japanese?	n
person 1	突然ごめんなさいね。実はわたし無神論者なんです。神に助けられたと思ったこともないし。宗教の勧誘ではないので安心してください。	I'm sorry for suddenly, but I never thought God could help me.	n
person 2	ああ、そうですか、正直ドキッとしましたよ。でも、そう思うようになったキッカケなど、心当たりは？	Oh, yeah, but you think that's a little kid, don't you?	n
person 1	わたし昔から肥満体型なんですけど、神様仏様にどうか脂肪を落としてくださいっていくら願っても叶えてもらえてないから。もう信じるのをやめたんです。	I'm a fat man since I was a fat man, but I can't believe it, because I don't want to hear it anymore.	n
person 2	たしかに、それは信じるのが嫌になりますね。わたしも食べ歩きが好きなので、スタイルが崩れるのは心配です。	Of course I don't like to walk anymore, because I don't like to think about it anymore.	n
person 1	あなたはもっと太った方がいいくらいですよ！食べ歩きわたしも大好きです！	You should be taller! I love to walk too!	n
person 2	わたしが、不思議と食べてもスタイルをキープできているのは、猫舌でゆっくり冷ましながら食べるせいかもしれません。	If I could eat a strange style, it could be cold and slow and slow.	n
person 1	それはいいことを聞きました。ゆっくり冷ましながら食べると効果があるのね。あとあなたがしていることとかぜひ教えてください。	I've been told that it's going to be good for you to eat it, and then you'll have to relax.	n
person 2	ええ、あとでね。ところで質問なんですけど、もし痩せることができたら、あなたはまた神を信じられるようになると思いますか？	Well, if I can ask you a question later, can I ask you a question?	n
