# Supplementary material
Source: ML conference proceedings conference paper supplement (https://aclanthology.org/2022.eval4nlp-1.9)
Supplement: SupplementaryMaterial [file 0039.xlsx]

## Sheet: Sheet1
person	source	translation	evaluation: is this a good translation?
person 1	こんにちは。最近どうされてますか？嫌なこととかなかったですか？	Hello, how have you been lately?	n
person 2	元気にしてましたよ。嫌なことといえば狭い場所が苦手なのにたいていトイレの個室が狭いことに毎回嫌気がさします。あなたは何かあったんですか？	I've been fine, and there's always something small about the bathroom that you don't like.	n
person 1	わたしはいつもどおり、セラピストの仕事に明け暮れてますよ。でも、個室の狭さが気になるとは、ちょっと気持ち的に追い詰められてます？	I always get to work as a therapist, but it makes me feel a little more comfortable in a private room, don't you think?	n
person 2	セラピストのお仕事も大変みたいですね。追い詰められている自覚はないですけどね。もう慣れましたし。なんだかカンセリングしてるみたい。	Well, I guess I'm pretty used to getting used to working with a therapist, too, huh?	n
person 1	あら、それはごめんなさい！わたしのことを聞き上手なんて言ってくれる人もいますけど、セラピーでもないのに、こういう態度は失礼ですよね。	Well, I'm sorry to say that, but I'm sorry, but I'm not a therapy therapist.	n
person 2	失礼ではないですよ。わたしはどちらかというと大らかだという人が周りに多いくらいなのであまり気にはしてなかったですよ。ただ珍しくて。	I'm sorry, but I'm not really very interested in any of us.	n
person 1	大らかなのはとっても良いことですね。わたしはちょっと神経質なところもあって、スタイルを維持するのに必死なんですよ。	Well, that's very good for me to keep my style a little nervous, and I'm really desperate to keep my style right now.	n
person 2	確かにあなたのスタイルを維持するには努力がいりそうですね。わたしは田舎に住んでいるので見た目をあまり気にすることがないので尊敬します。	Well, I don't really want to be able to respect your style so much, so I don't want to live in the country.	n
person 1	尊敬だなんて、滅相もない。食べ歩きが趣味なんで、いつも食べすぎ気味なんですから！	I don't respect your respect, because I always eat too much food!	n
person 2	それでそのスタイルを維持してるんですね！やっぱりすごい！	So you keep that style on!	n
