# Supplementary material
Source: ML conference proceedings conference paper supplement (https://aclanthology.org/2022.eval4nlp-1.9)
Supplement: SupplementaryMaterial [file 0039.xlsx]

## Sheet: Sheet1
person	source	translation	evaluation: is this a good translation?
person 1	こんにちは。最近どうされてますか？嫌なこととかなかったですか？	Hello, what have you been up to recently? I trust nothing bad has happened?	n
person 2	元気にしてましたよ。嫌なことといえば狭い場所が苦手なのにたいていトイレの個室が狭いことに毎回嫌気がさします。あなたは何かあったんですか？	I've been doing fine, thanks. Speaking of bad things, I'm a bit claustrophobic, and toilet stalls are usually cramped, which puts me off every time. What's new with you?	y
person 1	わたしはいつもどおり、セラピストの仕事に明け暮れてますよ。でも、個室の狭さが気になるとは、ちょっと気持ち的に追い詰められてます？	I'm the same as always: busy from morning until night at my job as a therapist. However, I wonder if your dislike of enclosed spaces is something that troubles you emotionally?	y
person 2	セラピストのお仕事も大変みたいですね。追い詰められている自覚はないですけどね。もう慣れましたし。なんだかカンセリングしてるみたい。	A job as a therapist seems hard. I'm not aware of being troubled, I'm used to it. It kind of feels like I'm receiving counselling.	n
person 1	あら、それはごめんなさい！わたしのことを聞き上手なんて言ってくれる人もいますけど、セラピーでもないのに、こういう態度は失礼ですよね。	Oh, sorry about that! Some people tell me that I'm a good listener, but I guess this attitude is kind of rude when it's not a therapy session.	n
person 2	失礼ではないですよ。わたしはどちらかというと大らかだという人が周りに多いくらいなのであまり気にはしてなかったですよ。ただ珍しくて。	No, it's not rude. So many people I know say that, if anything, I'm easygoing, so that's not anything I've ever worried about. I just thought it was unusual.	y
person 1	大らかなのはとっても良いことですね。わたしはちょっと神経質なところもあって、スタイルを維持するのに必死なんですよ。	It's good to be easygoing. I can be a little neurotic, and am in a constant battle to stay in shape.	y
person 2	確かにあなたのスタイルを維持するには努力がいりそうですね。わたしは田舎に住んでいるので見た目をあまり気にすることがないので尊敬します。	It certainly seems like it requires effort to stay in shape. I live in a rural area, and I've never really cared about my appearance, so I respect you.	n
person 1	尊敬だなんて、滅相もない。食べ歩きが趣味なんで、いつも食べすぎ気味なんですから！	Respect? Don't be absurd. I love walking around and sampling the cuisine at different restaurants, so I tend to always eat too much!	n
person 2	それでそのスタイルを維持してるんですね！やっぱりすごい！	And despite that, you're still in shape! You are amazing after all!	n
