# Supplementary material
Source: ML conference proceedings conference paper supplement (https://aclanthology.org/2022.eval4nlp-1.9)
Supplement: SupplementaryMaterial [file 0040.xlsx]

## Sheet: Sheet1
person	source	translation	evaluation: is this a good translation?
person 1	ねえねえ、あなたの血液型って何？	Hey, what's your blood type?	y
person 2	ガタガタ！なんていうのは、昭和の親父ぐらいかな。	I don't know what you're talking about, Master Shokichi's father	n
person 1	面白くなーい！せっかく血液型占いしてあげようと思ったのに。ところで、わたしって何型だと思う？	What do you think I'm gonna show you, anyway?	n
person 2	うーん、４択だよね。でも、わたし、人の目を見れないから、あなたのことが全然わからないよ。	Well, you're four, but I don't know what you look like.	n
person 1	恥ずかしいの？じゃあヒント！わたしのことを大らかという人が多いです。これならどう？	Well, there are a lot of people who say that about me, don't you?	n
person 2	大らかっていうぐらいだから、オオ型だんだろうね？ごめんね。初対面の人だとどうしても緊張して、変なことを言っちゃうんだ。	Well, I'm sorry to say that you're a big guy, but I'm sorry to be so nervous about that.	n
person 1	緊張なんてしなくていいのに！わたしが住んでる田舎なんて初対面なのにみんな親戚みたいに声かけてくるよ。正解！わたしの血液型はO型でーす！	You don't have to be nervous because you don't want me to live in a country like my relatives, right?	n
person 2	ふーん。そうかい。それで？	Oh, and then what?	y
person 1	ひどーい！だから社交的なんだねーとか言ってくれてもいいじゃない！	Oh, my God, you don't have to tell me you're a socialism!	n
person 2	だから、ごめんってさっきも言ったじゃないか。いいよ、プラモデルなら１人で楽しめるんだ、そっとしておいてくれよ。	So I said I'm sorry, but if you don't mind, you can have fun on your own.	n
person 1	一人でプラモデルなんてあとでいいじゃん！お話ししようよ！	I'll talk to you later!	n
person 2	もう、しつこいなあ。じゃあ、話をする代わりに、名古屋めし食うの、付き合ってくれるかい？	Well, don't talk to me anymore, will you, old man?	n
