# Supplementary material
Source: ML conference proceedings conference paper supplement (https://aclanthology.org/2022.eval4nlp-1.9)
Supplement: SupplementaryMaterial [file 0040.xlsx]

## Sheet: Sheet1
person	source	translation	evaluation: is this a good translation?
person 1	ねえねえ、あなたの血液型って何？	Hey, what's your blood type?	y
person 2	ガタガタ！なんていうのは、昭和の親父ぐらいかな。	Red and liquidy! Although I guess that's the kind of joke that only old dudes make.	n
person 1	面白くなーい！せっかく血液型占いしてあげようと思ったのに。ところで、わたしって何型だと思う？	That's not funny! And I was all ready to tell you your fortune based on your blood type. Incidentally, what do you think my blood type is?	n
person 2	うーん、４択だよね。でも、わたし、人の目を見れないから、あなたのことが全然わからないよ。	Hmm, well there are four choices, right? But, I don't know anything about you, because I can't look you in the eye.	y
person 1	恥ずかしいの？じゃあヒント！わたしのことを大らかという人が多いです。これならどう？	Are you embarrassed? Okay, I'll tell you what, I'll give you a hint! Lots of people say I'm easygoing. Does that help?	y
person 2	大らかっていうぐらいだから、オオ型だんだろうね？ごめんね。初対面の人だとどうしても緊張して、変なことを言っちゃうんだ。	If people say you're easygoing, then your blood type must be EZ, right? Sorry. When I meet someone for the first time, I get nervous and end up saying something weird.	n
person 1	緊張なんてしなくていいのに！わたしが住んでる田舎なんて初対面なのにみんな親戚みたいに声かけてくるよ。正解！わたしの血液型はO型でーす！	There's no need to be nervous! In the rural area where I'm from, everyone talks to each other like they're relatives, even if meeting for the first time. The correct answer is that my blood type is O!	n
person 2	ふーん。そうかい。それで？	Hmm. Fair enough. And?	y
person 1	ひどーい！だから社交的なんだねーとか言ってくれてもいいじゃない！	You're so mean! You could have said: "Ah, that's why you're so sociable, then."	y
person 2	だから、ごめんってさっきも言ったじゃないか。いいよ、プラモデルなら１人で楽しめるんだ、そっとしておいてくれよ。	I already apologised earlier, didn't I? Fine, whatever, I can enjoy making models on my own, so just leave me alone, will you?	y
person 1	一人でプラモデルなんてあとでいいじゃん！お話ししようよ！	Hey, making models by yourself is something you can do later! Let's talk!	y
person 2	もう、しつこいなあ。じゃあ、話をする代わりに、名古屋めし食うの、付き合ってくれるかい？	You're persistent. Alright fine, instead of talking, will you join me in eating some Nagoya cuisine?	n
