# Supplementary material
Source: ML conference proceedings conference paper supplement (https://aclanthology.org/2022.eval4nlp-1.9)
Supplement: SupplementaryMaterial [file 0041.xlsx]

## Sheet: Sheet1
person	source	translation	evaluation: is this a good translation?
person 1	ちょっと質問なんだけどさ。	I need to ask you a few questions.	y
person 2	なになに？	What?	y
person 1	名古屋めしって言ったら、一番最初に思いつくのは味噌カツ？エビフライ？	Do you have any idea what the first prawn is?	n
person 2	わたしはひつまぶしだけどなー。あなたはどっちなの？	I'm a little rusty, but which one are you?	n
person 1	ひつまぶしね！わたしは味噌カツだったんだ。	I had a taste!	n
person 2	わたしは転勤族の家庭で育ったから名古屋にも住んだことあるけど味噌カツってそんなに頻繁に食べてなかったよ。	I grew up in an old family home, and I used to live in a very old book shop, but I didn't eat that much much.	n
person 1	そうなんだね。わたしはずっと愛知で育って、味噌カツが定番メニューでさ。でも、じつは味噌カツは名古屋発祥じゃないんだよ。	Yeah, well, I've been raised, but I'm not used to it, and I've been raised to it all the time, so I've been raised.	n
person 2	そうなの！？知らなかった！わたしインドアだから外食とかもあまりしないから食べ物のことよく知らないんだよね。	I didn't know you didn't eat too much food, so I didn't know about food.	n
person 1	そうなんだよ。名古屋めしを愛してきた、このわたしが、こんな初歩的なミスをするなんて！	Yeah, I've always loved this old man's first step!	n
person 2	それはちょっと恥ずかしいね。ところで発祥はどこなの？	Where is it, by the way?	n
