# Supplementary material
Source: ML conference proceedings conference paper supplement (https://aclanthology.org/2022.eval4nlp-1.9)
Supplement: SupplementaryMaterial [file 0041.xlsx]

## Sheet: Sheet1
person	source	translation	evaluation: is this a good translation?
person 1	ちょっと質問なんだけどさ。	I've got a bit of a question for you.	y
person 2	なになに？	Oooh, what is it?	y
person 1	名古屋めしって言ったら、一番最初に思いつくのは味噌カツ？エビフライ？	If someone mentions Nagoya cuisine, what's the first thing that comes to mind? Is it pork cutlets topped with miso? Or maybe fried shrimp?	y
person 2	わたしはひつまぶしだけどなー。あなたはどっちなの？	Chopped eel over rice is the only thing that comes to mind. Which do you think of?	y
person 1	ひつまぶしね！わたしは味噌カツだったんだ。	Oh yeah, chopped eel over rice! For me miso pork cutlets come to mind.	y
person 2	わたしは転勤族の家庭で育ったから名古屋にも住んだことあるけど味噌カツってそんなに頻繁に食べてなかったよ。	I grew up in a family that moved around a lot for work, so I've lived in Nagoya, but I didn't eat miso pork cutlets very often.	y
person 1	そうなんだね。わたしはずっと愛知で育って、味噌カツが定番メニューでさ。でも、じつは味噌カツは名古屋発祥じゃないんだよ。	Oh right. I grew up in Aichi prefecture the whole time, and pork cutlets topped with miso were something that often appeared on the table. But, pork cutlets topped with miso didn't actually originate in Nagoya.	y
person 2	そうなの！？知らなかった！わたしインドアだから外食とかもあまりしないから食べ物のことよく知らないんだよね。	What, really? I didn't know that! I'm an indoorsy-type and therefore don't eat out much, so I don't know that much about food.	y
person 1	そうなんだよ。名古屋めしを愛してきた、このわたしが、こんな初歩的なミスをするなんて！	It's true though. I can't believe that I, someone who has grown up with a love of Nagoya cuisine, could make such a basic mistake!	y
person 2	それはちょっと恥ずかしいね。ところで発祥はどこなの？	Yeah, that's a little embarrassing. So where did it come from then?	y
