# Supplementary material
Source: ML conference proceedings conference paper supplement (https://aclanthology.org/2022.eval4nlp-1.9)
Supplement: SupplementaryMaterial [file 0042.xlsx]

## Sheet: Sheet1
person	source	translation	evaluation: is this a good translation?
person 1	すみません。ファックスの調子が悪いので見てもらってもいいですか？	I'm sorry, can I take a look at that?	n
person 2	えー！中学生のわたしが見ても良いの？かえって壊しちゃうかもよ？	Can I see my middle student?	n
person 1	わたし本当に機械に弱くて。こういうのって若い人の方が得意なんじゃないの？	Are you really a young man like this?	n
person 2	若い人って言ってもさあ、限度があるじゃん！まあ、見てあげてもいいよ？わたし、お母さんからも頼られてるし！	Well, there are limits for young people, so I can see them from my mother!	n
person 1	それは頼もしい！お母さんと仲いいのね。	That's very close to my mother!	n
person 2	仲がいいっていうか、お母さんとわたし、二人っきりの家族だからね。	Let's get along, Mom, because I'm the only family I have left.	n
person 1	そうなんだ。わたしは転勤族の家庭で育ったからあまり友達がいないの。	Well, I grew up in a family job camp, so I don't have much friends.	n
person 2	あー、かわいそう！わたしも、最近愛媛から転校してきたからさ、同じだね！	Oh, poor thing, I've been in love lately!	n
person 1	本当だね。よかったらお友達にならない？わたし趣味で手芸をやってるんだけど一緒にやってみない？	If it's okay with you, why don't you join me with your hobby?	n
person 2	やってみたい！でも、帰りが遅くなるのはちょっと困るな。暗いところが苦手だから、帰り道が怖いよ。	I'd like to try, but I'm not too scared to go home so late!	n
