# Supplementary material
Source: ML conference proceedings conference paper supplement (https://aclanthology.org/2022.eval4nlp-1.9)
Supplement: SupplementaryMaterial [file 0042.xlsx]

## Sheet: Sheet1
person	source	translation	evaluation: is this a good translation?
person 1	すみません。ファックスの調子が悪いので見てもらってもいいですか？	Excuse me. Would you mind taking a look at my fax machine for me because it doesn't seem to be working properly?	y
person 2	えー！中学生のわたしが見ても良いの？かえって壊しちゃうかもよ？	What?! Is it okay for me to look at it even though I'm only a junior high school student? What if I ended up breaking it instead?	y
person 1	わたし本当に機械に弱くて。こういうのって若い人の方が得意なんじゃないの？	But I honestly don't know anything about technology. I thought this was the kind of thing that young people are good at.	y
person 2	若い人って言ってもさあ、限度があるじゃん！まあ、見てあげてもいいよ？わたし、お母さんからも頼られてるし！	You might say "young people", but there is a limit! But,I guess I can take a look. My mum also relies on my help!	y
person 1	それは頼もしい！お母さんと仲いいのね。	That sounds reliable. You must get on well with your mother.	y
person 2	仲がいいっていうか、お母さんとわたし、二人っきりの家族だからね。	It's not so much that we get on well, more that my family is just me and my mum.	y
person 1	そうなんだ。わたしは転勤族の家庭で育ったからあまり友達がいないの。	Oh right. Well, I grew up in a family that moved around a lot due to my parents' work, so I don't have many friends.	y
person 2	あー、かわいそう！わたしも、最近愛媛から転校してきたからさ、同じだね！	Oh, you poor thing! I recently transferred schools from Ehime, so I'm the same!	y
person 1	本当だね。よかったらお友達にならない？わたし趣味で手芸をやってるんだけど一緒にやってみない？	You're right. You can be friends with me, if you'd like? I like to do crafts as a hobby, but would you like to make something together?	y
person 2	やってみたい！でも、帰りが遅くなるのはちょっと困るな。暗いところが苦手だから、帰り道が怖いよ。	I'd love that! But,it would be a bit of a problem if it gets late before I go home. I'm afraid of the dark, so I'd be scared on the way home.	y
