# Supplementary material
Source: ML conference proceedings conference paper supplement (https://aclanthology.org/2022.eval4nlp-1.9)
Supplement: SupplementaryMaterial [file 0043.xlsx]

## Sheet: Sheet1
person	source	translation	evaluation: is this a good translation?
person 1	最悪ー！ちょっと聞いてよ、嫌なもの見ちゃった！	This sucks! Hey, listen, I just saw something awful!	y
person 2	どしたの？	What's up?	y
person 1	中学校のクラスの子がさ、面白い映画あるよってDVD貸してくれたんだけど、ホラーだったの！見るんじゃなかった！	A kid in my class at junior high lent me a DVD saying it was a good film, but it was a horror film! I shouldn't have watched it!	y
person 2	ホラー大嫌いなのにかわいそう。わたしが趣味の筋トレで鍛えた体で一発お見舞いしてあげようか？	Even though you hate horror films? That does suck. Do you want to me to rough them up using my firmly-toned muscles forged through my passion of weight training?	y
person 1	して！わたし、お母さんと二人暮らしだから、基本的に暗くなるまで１人で留守番なの。だから暗い場所も、すっごく苦手なのにー！	Yeah, punish them! I live with just my mum, and so I'm basically at home alone until it gets dark. That's why I don't like the dark either!	y
person 2	そんな時に限って思い出したりしちゃうのよね。わたしも苦いものが苦手だから大学時代罰ゲームで青汁飲んだ時は最悪だった。	That's precisely the kind of time that you'll remember what was in the movie. I don't like bitter foods, so it was horrible at university when I had to drink a green smoothie as a forfeit in a game.	y
person 1	うわ！それ、最悪だね！やっぱり、今回のDVDも罰ゲームみたいだと思う？これってイジメ？	Bleurgh! That's the worst! Do you think this DVD was like a penalty as well? Is this bullying?	y
person 2	いじめは言い過ぎかもしれないけどとりあえず今度その子達に合わせてよ。お灸を据えてあげなきゃ。	It might be an exaggeration to say it's bullying, but first of all, let me meet that kids sometime. I'll give them a good talking-to.	y
person 1	うん、ありがとう。でもね、わたし、その子とそんなに親しいわけじゃないんだ。実を言うと、つい１周間前に知り合った子なの。	Okay, thanks. Although, we're not that close. In fact, I only met them a week ago.	y
person 2	最近じゃない。もしかするとそのDVDもその子なりのお近づきの印だったのかも。今回はわたしの出る幕はなさそうだね。	That's recent, isn't it. Perhaps the DVD was that kid's way showing friendship. I don't think there's any reason for me to get involved this time.	y
