# Supplementary material
Source: ML conference proceedings conference paper supplement (https://aclanthology.org/2022.eval4nlp-1.9)
Supplement: SupplementaryMaterial [file 0043.xlsx]

## Sheet: Sheet1
person	source	translation	evaluation: is this a good translation?
person 1	最悪ー！ちょっと聞いてよ、嫌なもの見ちゃった！	Oh, my God! I saw something terrible!	n
person 2	どしたの？	What's going on?	y
person 1	中学校のクラスの子がさ、面白い映画あるよってDVD貸してくれたんだけど、ホラーだったの！見るんじゃなかった！	The kid from the middle school gave me a movie, but I didn't see him in the scary way!	n
person 2	ホラー大嫌いなのにかわいそう。わたしが趣味の筋トレで鍛えた体で一発お見舞いしてあげようか？	You know, I'm just a little scared of being able to help you with my taste.	n
person 1	して！わたし、お母さんと二人暮らしだから、基本的に暗くなるまで１人で留守番なの。だから暗い場所も、すっごく苦手なのにー！	So I'm gonna spend the night with my mother, and I'm gonna spend the night with my mother, and it's so dark and I'm gonna be alone in the dark!	n
person 2	そんな時に限って思い出したりしちゃうのよね。わたしも苦いものが苦手だから大学時代罰ゲームで青汁飲んだ時は最悪だった。	You remember, when I had a bad time in college, I drank blue juice, and it was the worst time in college.	n
person 1	うわ！それ、最悪だね！やっぱり、今回のDVDも罰ゲームみたいだと思う？これってイジメ？	Do you think this is the worst gig I've ever had?	n
person 2	いじめは言い過ぎかもしれないけどとりあえず今度その子達に合わせてよ。お灸を据えてあげなきゃ。	I don't know, but it might be a bad idea, but I'm going to have to put these guys on the line right now.	n
person 1	うん、ありがとう。でもね、わたし、その子とそんなに親しいわけじゃないんだ。実を言うと、つい１周間前に知り合った子なの。	Yeah, well, thank you, but it's not that close to me that I've known those kids for a while.	n
person 2	最近じゃない。もしかするとそのDVDもその子なりのお近づきの印だったのかも。今回はわたしの出る幕はなさそうだね。	Maybe this is where I'll be when I get the DVD from now on.	n
