# Supplementary material
Source: ML conference proceedings conference paper supplement (https://aclanthology.org/2022.eval4nlp-1.9)
Supplement: SupplementaryMaterial [file 0044.xlsx]

## Sheet: Sheet1
person	source	translation	evaluation: is this a good translation?
person 1	初めまして。もしかしてこの前の大会に出てらっしゃいましたか？	Nice to meet you. Did you take part in the last tournament, by any chance?	y
person 2	いや、ちょっと人違いかも。誰かに似てるんですかね？	No, I think you're mistaking me for someone else. Do I look like someone?	y
person 1	ごめんなさい。わたし以前高知の大学に通ってたんですけど、そこのOBで有名人がいてその人かなと思っちゃいました。	Oh, sorry. I used to attend a university in Kochi, and there's a graduate from there who's quite famous and I thought you were them.	y
person 2	あ、そうだったんですか。わたし、今、大学生ですけど、逆ナンかと思って、一瞬ドキッとしちゃいましたよ。	Oh, I see. Well,I'm at university right now; I was a little surprised, because I thought you were hitting on me.	y
person 1	すみません。でもわたし逆ナンなんてしないですよ。だって趣味が筋トレだから体ゴツいし可愛くないし。	Sorry. But I'm not like that, though. At any rate, my hobby is weight training, so my body is well-built and not cute at all.	y
person 2	いやいや、引き締まってて素敵じゃないですか！おっと、こんなこと言ってるのを遠距離の彼女に聞かれたら、福岡からげんこつが飛んでくるな！	No no, your body's toned and you look amazing! Oops,if my long-distance girlfriend overheard me saying something like that, she'd be on the next train here from Fukuoka to come and give me a slap!	y
person 1	相手がわたしみたいなのだと疑いもされないですよ！あ、でもわたし体が柔らかいんです。あなたは何かスポーツとかされてないんですか？	But she wouldn't be suspicious if the person you're talking to is someone like me! Oh, but my body is flexible. Do you do any kind of sports?	y
person 2	スポーツは全然ですねえ。学校以外では株取引をやってるんで、ずっと座ってるから骨と皮みたいな体型ですよ。	No, I don't do any sports at all. Other than uni, I just trade stocks, so I'm always sitting down and my body is just like a bag of skin and bones.	y
person 1	大学生で株をやってるなんてすごい！わたしなんて体動かすことしかできないからボルダリングが好きなくらいで。本当にすごいですね。	Wow, you're at university and you're trading stocks,that's amazing! I'm only good at physical activity, so bouldering is about the only thing I like. You're truly amazing.	y
person 2	へえー！ボルダリングのほうがすごくないですか？	Whoa! Isn't bouldering more impressive?	y
