# Supplementary material
Source: ML conference proceedings conference paper supplement (https://aclanthology.org/2022.eval4nlp-1.9)
Supplement: SupplementaryMaterial [file 0044.xlsx]

## Sheet: Sheet1
person	source	translation	evaluation: is this a good translation?
person 1	初めまして。もしかしてこの前の大会に出てらっしゃいましたか？	Nice to meet you. Have you seen him before?	n
person 2	いや、ちょっと人違いかも。誰かに似てるんですかね？	No, I think it looks like someone else.	n
person 1	ごめんなさい。わたし以前高知の大学に通ってたんですけど、そこのOBで有名人がいてその人かなと思っちゃいました。	I'm sorry, I've been to college before, but I thought there was this famous guy over there in OB.	n
person 2	あ、そうだったんですか。わたし、今、大学生ですけど、逆ナンかと思って、一瞬ドキッとしちゃいましたよ。	Oh, I thought you were a college student now, Nan.	n
person 1	すみません。でもわたし逆ナンなんてしないですよ。だって趣味が筋トレだから体ゴツいし可愛くないし。	I'm sorry, but I'm not a very nice person.	n
person 2	いやいや、引き締まってて素敵じゃないですか！おっと、こんなこと言ってるのを遠距離の彼女に聞かれたら、福岡からげんこつが飛んでくるな！	No, it's so nice to hear what she said!	n
person 1	相手がわたしみたいなのだと疑いもされないですよ！あ、でもわたし体が柔らかいんです。あなたは何かスポーツとかされてないんですか？	You think I'm cute, but you don't suspect me?	n
person 2	スポーツは全然ですねえ。学校以外では株取引をやってるんで、ずっと座ってるから骨と皮みたいな体型ですよ。	Sport's not much of a sports fan, so I've been sitting here all day sitting with my bones and skin.	n
person 1	大学生で株をやってるなんてすごい！わたしなんて体動かすことしかできないからボルダリングが好きなくらいで。本当にすごいですね。	I can't move the stock in college because I love the Volturi ring so much!	n
person 2	へえー！ボルダリングのほうがすごくないですか？	Is that really the worst ring you can do?	n
