# Supplementary material
Source: ML conference proceedings conference paper supplement (https://aclanthology.org/2022.eval4nlp-1.9)
Supplement: SupplementaryMaterial [file 0045.xlsx]

## Sheet: Sheet1
person	source	translation	evaluation: is this a good translation?
person 1	どうもこんにちは。ふぅ、、、遠距離恋愛って難しいですね。	Hello, it's hard to love a long way from home.	n
person 2	そうかな？わたしはちょっと離れてるくらいがちょうどいいと思うけど。	Well, I think I'm just a little away.	n
person 1	わたしもそう思ってるんですけど、彼女のほうが寂しいらしくて。福岡に住んでるのに、今すぐ会いに来て、とか言うんですよ。	I think so too, but now she lives in Nagatacho, and she's coming to see you.	n
person 2	可愛いじゃないですか。それくらいストレートな方がわかりやすくていいですよ。ほら、わたし空気を読むの苦手だから。彼女は学生？	You know, she's not as good as reading air, is she?	n
person 1	ええ、わたしと同じ大学生です。空気読むのが苦手って、誰かに言われたんですか？だとしたら、ちょっとひどいですね。	Yeah, just like me, I'm a college student, and someone told me that if I didn't like to read air, I'd be sick of reading it for a while, right?	n
person 2	わたし京都に住んでる大学院生なんですけど院の仲間から言われたんです。でも確かにそうだなと自分でも思います。	But I think I live in Kashiwada's school, but I think I'm a student of my own.	n
person 1	そうですか。でもそういうのって個性でもあるし、気にしないほうが良いですよ。あなた、お酒とかは飲むんですか？	Yeah, but you don't mind if I drink, do you?	n
person 2	たまに飲みますよ。あなたも？	Sometimes you drink too?	y
person 1	いえ、わたしは苦手なんです。でも、そう言って飲み会を断ると、空気読めないって言われるんですよ。酷いでしょ？	No, I'm not very good at it, but you say you can't read the drinks, can you?	n
person 2	お互い似た者同士ですね。ただ、本当に空気が読めないわたしから言わせれば飲めないから飲み会を断ることは当たり前ですからお気になさらず。	I'm not really good at it, so if you don't mind, we can't really drink air.	n
person 1	ありがとう。やさしいなあ。人付き合いって難しいので、わたしはネットで株取引するのが性に合ってます。	Thank you very much, because I have a lot of money to deal with on the Internet.	n
person 2	株してらっしゃるんですね！それは初耳です！今度ぜひ株について教えてください！	You've never heard of that before!	n
