# Supplementary material
Source: ML conference proceedings conference paper supplement (https://aclanthology.org/2022.eval4nlp-1.9)
Supplement: SupplementaryMaterial [file 0045.xlsx]

## Sheet: Sheet1
person	source	translation	evaluation: is this a good translation?
person 1	どうもこんにちは。ふぅ、、、遠距離恋愛って難しいですね。	Hello. Sigh... long-distance relationships are hard.	y
person 2	そうかな？わたしはちょっと離れてるくらいがちょうどいいと思うけど。	Are they? I think a little separation is just right,though.	y
person 1	わたしもそう思ってるんですけど、彼女のほうが寂しいらしくて。福岡に住んでるのに、今すぐ会いに来て、とか言うんですよ。	I think so too, but apparently my girlfriend is lonely. Even though she's living all the way over in Fukuoka, she says things like, "Come and meet me right now."	y
person 2	可愛いじゃないですか。それくらいストレートな方がわかりやすくていいですよ。ほら、わたし空気を読むの苦手だから。彼女は学生？	That's cute though, isn't it? It's better to be direct, it's easier to understand. See, I'm not very good at sensing the mood. Is your girlfriend a student?	y
person 1	ええ、わたしと同じ大学生です。空気読むのが苦手って、誰かに言われたんですか？だとしたら、ちょっとひどいですね。	Yeah, she's a university student like me. Has somebody told you that you're not good at sensing the mood? Because that's a bit harsh if so.	y
person 2	わたし京都に住んでる大学院生なんですけど院の仲間から言われたんです。でも確かにそうだなと自分でも思います。	I'm a graduate student living in Kyoto, and a friend at the graduate school said that to me. But I also think that's true.	y
person 1	そうですか。でもそういうのって個性でもあるし、気にしないほうが良いですよ。あなた、お酒とかは飲むんですか？	Really? But something like that also gives you character, so I wouldn't worry about it. Do you drink alcohol?	y
person 2	たまに飲みますよ。あなたも？	I drink occasionally. You too?	y
person 1	いえ、わたしは苦手なんです。でも、そう言って飲み会を断ると、空気読めないって言われるんですよ。酷いでしょ？	No, I can't handle it. But, if I say that when declining an invitation to go drinking, people tell me that I can't sense the mood. That's pretty harsh, isn't it?	y
person 2	お互い似た者同士ですね。ただ、本当に空気が読めないわたしから言わせれば飲めないから飲み会を断ることは当たり前ですからお気になさらず。	Sounds like we're both alike. However, even though I'm really bad at sensing the mood, if you ask me, I'd say it's perfectly reasonable to decline an offer to go out drinking if you can't handle alcohol, so don't worry about it.	y
person 1	ありがとう。やさしいなあ。人付き合いって難しいので、わたしはネットで株取引するのが性に合ってます。	Thanks, you're so kind. Socialising is hard, trading stocks online is something that suits me far better.	y
person 2	株してらっしゃるんですね！それは初耳です！今度ぜひ株について教えてください！	You trade stocks?! That's the first time I've heard about that! You'll have to teach me about stocks sometime!	y
