# Supplementary material
Source: ML conference proceedings conference paper supplement (https://aclanthology.org/2022.eval4nlp-1.9)
Supplement: SupplementaryMaterial [file 0046.xlsx]

## Sheet: Sheet1
person	source	translation	evaluation: is this a good translation?
person 1	ねえ、あなたってネットオークションってしたことある？	Hey, have you ever bought or sold anything in an online auction?	y
person 2	ネットショッピングはよくするけど、オークションはまだやったことないなあ。あなたはよくやるの？	I buy stuff online fairly often, but I've never bought or sold anything in an auction. Do you often use auctions?	y
person 1	わたしもなくて、今すごくネットオークションに興味があるの！どんな雰囲気なのかなーと思って！	I haven't used either, but I'm really intrigued about online auctions right now! I wonder what it's like!	y
person 2	ああ、気になりますよねー。わたし、フリーターだから暇な時間がたくさんあって、サイトだけはよく覗いてるんですよ。	Yeah, one can't help but be curious. I work part-time, so I've got a lot of free time, and I often just look at auction sites.	y
person 1	へー！今度お話聞かせてくださいよ！今ってどこに住んでらっしゃるんですか？	No way! You'll have to tell me about it some time! Where do you live currently?	n
person 2	わたしは長いこと長崎に留まってますね。もう何年になるんだろう。あなたは？	I've remained in Nagasaki for a long time; it's probably been several years now. What about you?	y
person 1	長崎かーいいとこだけど遠いなー！わたしは京都在住です。	Nagasaki? It's a nice place, but it's really far from here! I live in Kyoto.	y
person 2	京都！いいですね。出身もそちらなんですか？	Kyoto?! Nice. Are you from there originally?	y
person 1	生まれも育ちもずっと京都です。京都って実はグラマーな人が多いって言われてるの知ってます？	Yes, Kyoto, born and raised. Did you know that people say Kyoto is full of curvaceous women?	y
person 2	えっ！知りませんでした。いつか上京しようと思ってたんですが、東京や大阪じゃなくて、京都もありだなあ。	What?! No,I did not know that. I've thought of moving to a big city one day, but it sounds like Kyoto could be a contender, not just Tokyo or Osaka.	y
