# Supplementary material
Source: ML conference proceedings conference paper supplement (https://aclanthology.org/2022.eval4nlp-1.9)
Supplement: SupplementaryMaterial [file 0046.xlsx]

## Sheet: Sheet1
person	source	translation	evaluation: is this a good translation?
person 1	ねえ、あなたってネットオークションってしたことある？	Hey, you ever set up a Internet auction?	n
person 2	ネットショッピングはよくするけど、オークションはまだやったことないなあ。あなたはよくやるの？	The Internet shopping is good, but the Orcs haven't done much good yet?	n
person 1	わたしもなくて、今すごくネットオークションに興味があるの！どんな雰囲気なのかなーと思って！	I'm interested in what's going on in the Internet without me!	n
person 2	ああ、気になりますよねー。わたし、フリーターだから暇な時間がたくさんあって、サイトだけはよく覗いてるんですよ。	Oh, don't worry, I've got a lot of free cameras looking around.	n
person 1	へー！今度お話聞かせてくださいよ！今ってどこに住んでらっしゃるんですか？	- Where are you living now?	n
person 2	わたしは長いこと長崎に留まってますね。もう何年になるんだろう。あなたは？	I'll stay for a long time now. How old are you now?	n
person 1	長崎かーいいとこだけど遠いなー！わたしは京都在住です。	Morisaki-san, I'm a long way from home!	n
person 2	京都！いいですね。出身もそちらなんですか？	Aren't you from Kyomar?	n
person 1	生まれも育ちもずっと京都です。京都って実はグラマーな人が多いって言われてるの知ってます？	Do you know a lot of people from Kyomar who grew up in Kyomar?	n
person 2	えっ！知りませんでした。いつか上京しようと思ってたんですが、東京や大阪じゃなくて、京都もありだなあ。	I didn't know. I was thinking of going up in Tokyo someday.	n
