# Supplementary material
Source: ML conference proceedings conference paper supplement (https://aclanthology.org/2022.eval4nlp-1.9)
Supplement: SupplementaryMaterial [file 0047.xlsx]

## Sheet: Sheet1
person	source	translation	evaluation: is this a good translation?
person 1	こんにちは。ちょっとお伺いしますけど、フリーターの男って、どう思います？	Hello. I've got a bit of question, but what do you think about men who only work part-time jobs?	y
person 2	うーん。どうかな。嫌な人は嫌かもしれませんね。ごめんなさい。わたし本当は人の悪口とか苦手なんですけどはっきり言っちゃいました。	Hmm, let's see. I guess people who don't like that lifestyle would find them disagreeable. Sorry. In reality I don't like talking bad about other people, but I accidentally went and put it bluntly.	y
person 1	あ、全然オッケーですよ。わたしもね、本心ではこのままでは駄目だって分かってるんです。	Oh no, it's absolutely fine. I already know deep down that I can't go on like this.	y
person 2	わたしは会社員ですが、脱サラして農業やってる人とか知ってますよ。あなたも自営業を初めてみるのもいいかもしれませんよ？	I work in an office, but I know people who have quit their 9 to 5 jobs and are doing farming and things like that now. It might be good if you started your own independent business.	y
person 1	なるほど、自営ねえ。ただ、会社員にしても、自営にしても、やっぱ働きやすいのは東京でしょ？いつかお金をためて上京したら、ちゃんと働こうと思いつつ、ダラダラと。	Indeed, my own business. But, whether you're a company employee or run your own business, it's much easier to work if you're in Tokyo, isn't it? I'd love to save up some money and one day move to Tokyo where I'll be able to work properly, but I'm a long way off achieving that.	y
person 2	東京かあ。わたしは東北地方に住んでいるので都会のことはわかりませんが、わたしは住みたいと思う場所ではないかな。	Tokyo,eh? Well I live in the Tohoku region so I don't know about big cities, but it's not the kind of place where I would like to live.	y
person 1	そうなんですか！東京に憧れない人は、長崎のわたしの周りではいないので、驚きました。理由はありますか？	Oh really? I'm amazed because in Nagasaki where I am, there's not a single person around who isn't attracted to Tokyo. Is there a reason why you don't want to live there?	y
person 2	人が多すぎるのが一番の理由ですね。わたしは東京よりも九州の方が断然好きなので長崎に住んでるあなたが羨ましいですよ！でも実は一番好きな九州の県は熊本県なんですけどね。	The biggest reason is that there are too many people. I like Kyushu much more than Tokyo, so I envy you living in Nagasaki! Although, my favourite prefecture in Kyushu has to be Kumamoto.	y
person 1	おや、熊本ですか。熊本のどういったところが好きか聞いても？	Oh, Kumamoto? May I ask what you like about Kumamoto?	y
person 2	やっぱり一番は食べ物かな。あなたが上京したい理由は手に職をつけたいからだけですか？	Above all, it has to be the food. Is the only reason why you want to move to Tokyo because you want to get a better job?	y
person 1	いや、単に面白そうだなと思ったまでです。でも、お話を聞いていて、気遣いが苦手なわたしでも長くやってこれた長崎が、一番合ってるのかもな。	No, I just thought Tokyo would be fun. Although, from what I've heard, I'm not very good at showing consideration for others, yet I've managed to get this far in Nagasaki, so it may be the best place for me after all.	y
person 2	結局地元が一番ということですよ！	So in the end, one's hometown is best!	y
