# Supplementary material
Source: ML conference proceedings conference paper supplement (https://aclanthology.org/2022.eval4nlp-1.9)
Supplement: SupplementaryMaterial [file 0047.xlsx]

## Sheet: Sheet1
person	source	translation	evaluation: is this a good translation?
person 1	こんにちは。ちょっとお伺いしますけど、フリーターの男って、どう思います？	Hello, but what do you think, a free man?	n
person 2	うーん。どうかな。嫌な人は嫌かもしれませんね。ごめんなさい。わたし本当は人の悪口とか苦手なんですけどはっきり言っちゃいました。	Well, I'm sorry, I didn't mean to be a bad person, but I really didn't mean to be a bad person.	n
person 1	あ、全然オッケーですよ。わたしもね、本心ではこのままでは駄目だって分かってるんです。	All right, I don't really know what to say anymore.	n
person 2	わたしは会社員ですが、脱サラして農業やってる人とか知ってますよ。あなたも自営業を初めてみるのもいいかもしれませんよ？	I'm a company manager, Sarah, but do you know who you are, who you are, who you are?	n
person 1	なるほど、自営ねえ。ただ、会社員にしても、自営にしても、やっぱ働きやすいのは東京でしょ？いつかお金をためて上京したら、ちゃんと働こうと思いつつ、ダラダラと。	Well, if you're working for, you'll be working in Tokyo by the time you do your job.	n
person 2	東京かあ。わたしは東北地方に住んでいるので都会のことはわかりませんが、わたしは住みたいと思う場所ではないかな。	I don't know if I want to live in Tokyo, because I don't want to live anywhere near the city.	n
person 1	そうなんですか！東京に憧れない人は、長崎のわたしの周りではいないので、驚きました。理由はありますか？	Is there a reason no one around Tokyo likes me so much?	n
person 2	人が多すぎるのが一番の理由ですね。わたしは東京よりも九州の方が断然好きなので長崎に住んでるあなたが羨ましいですよ！でも実は一番好きな九州の県は熊本県なんですけどね。	There are too many people in Tokyo that I love more than you!	n
person 1	おや、熊本ですか。熊本のどういったところが好きか聞いても？	But do you really like the book of Shimada University, too?	n
person 2	やっぱり一番は食べ物かな。あなたが上京したい理由は手に職をつけたいからだけですか？	The best food you want to do is get your hands on your work?	n
person 1	いや、単に面白そうだなと思ったまでです。でも、お話を聞いていて、気遣いが苦手なわたしでも長くやってこれた長崎が、一番合ってるのかもな。	No, it's just that I thought it would be interesting, but I've been listening to it for a long time, and I'm not very good at it.	n
person 2	結局地元が一番ということですよ！	Maybe it's the most local thing in the world!	n
