# Supplementary material
Source: ML conference proceedings conference paper supplement (https://aclanthology.org/2022.eval4nlp-1.9)
Supplement: SupplementaryMaterial [file 0048.xlsx]

## Sheet: Sheet1
person	source	translation	evaluation: is this a good translation?
person 1	年末年始の寒波は本当に寒くて大変でしたね。	The cold waves were really cold in the year.	n
person 2	ほんとですねー。わたし、派遣で勤めてるんで、雪で遅刻とかしたら、クビ切られるんじゃないかとヒヤヒヤしました。	Actually, I work for a ride in the snow, and I thought if I was late, I'd be fired.	n
person 1	わたしは東北地方に住んでるので雪かきが本当に大変でした。用がなければずっと家にいたので太らないよう気をつけていたらむしろ痩せてしまって。ウエストが細くなったんです。	If I hadn't lived in the West, I'd be more careful if I hadn't lived in the North, so I wouldn't have had a chance.	n
person 2	それは羨ましいわ！わたしが人に自慢できることろと言ったら、そうねえ、、、指が人より少し長いことぐらいかしら。	You know, I'd be happier than a few people say that, but I'd be happier than a finger in the west.	n
person 1	手が綺麗に見えるから指輪とか似合っていいじゃない！	You look beautiful because your hand looks beautiful.	n
person 2	あら、でも、そんなすごくってほどでもないんですよ。あの、わたし、人と比べたり争ったりするのが苦手なんで、こういう話は実は苦手なんです。	Well, it's not as good as mine, but I'm not good at having a fight with him.	n
person 1	わかる気がします。わたしは人の悪口が苦手なので誰かと比べてあーだこーだ言っているのを聞くの嫌なんですよね。	I know, but I don't like to hear it from someone else.	n
person 2	ああ、分かります。なんで人って、他の人が気になるんでしょうね。わたしなんて、絵を描く対象としてしか気にならないのに。	Well, I don't know why people would care if they were looking at me as someone else would paint a painting.	n
person 1	絵を描かれるんですね？素敵ですね。わたしも会社員として働いている時以外はあまり他の人に興味ないんですよね。今度あなたの絵を見せてくれませんか？	Would you like to see the rest of the company as well as I do?	n
person 2	まあ、そんなこと言ってくれる人、初めて。嬉しいな、もちろん良いですよ。なんか、あなたとなら、良いお友達になれそうな気がします。	Well, I'm glad you're the first person to show me something, right?	n
