# Supplementary material
Source: ML conference proceedings conference paper supplement (https://aclanthology.org/2022.eval4nlp-1.9)
Supplement: SupplementaryMaterial [file 0048.xlsx]

## Sheet: Sheet1
person	source	translation	evaluation: is this a good translation?
person 1	年末年始の寒波は本当に寒くて大変でしたね。	The cold spell over the New Year's holiday was really cold and rough, wasn't it?	y
person 2	ほんとですねー。わたし、派遣で勤めてるんで、雪で遅刻とかしたら、クビ切られるんじゃないかとヒヤヒヤしました。	It really was. I work through a temping agency, and I was afraid that I'd get fired if I was late due to the snow or something.	y
person 1	わたしは東北地方に住んでるので雪かきが本当に大変でした。用がなければずっと家にいたので太らないよう気をつけていたらむしろ痩せてしまって。ウエストが細くなったんです。	I live in the Tohoku region, so it was really tough having to shovel all the snow. I stayed at home when I didn't need to leave the house for anything, so I was taking care not to put on weight but, if anything, I ended up losing weight. My waistline is slimmer.	y
person 2	それは羨ましいわ！わたしが人に自慢できることろと言ったら、そうねえ、、、指が人より少し長いことぐらいかしら。	Jealous! The only thing I have to brag about is that my fingers are slightly longer than other people's.	y
person 1	手が綺麗に見えるから指輪とか似合っていいじゃない！	It makes your hands look beautiful, which must be nice, because rings suit you!	y
person 2	あら、でも、そんなすごくってほどでもないんですよ。あの、わたし、人と比べたり争ったりするのが苦手なんで、こういう話は実は苦手なんです。	Oh, but it's not that amazing. Um, I don't really like comparing or competing with other people, so this conversation topic is not really my cup of tea.	y
person 1	わかる気がします。わたしは人の悪口が苦手なので誰かと比べてあーだこーだ言っているのを聞くの嫌なんですよね。	I think I know where you're coming from. I don't like to talk bad about other people, so I don't like hearing people saying this and that in comparison with someone else.	y
person 2	ああ、分かります。なんで人って、他の人が気になるんでしょうね。わたしなんて、絵を描く対象としてしか気にならないのに。	Ah yeah, I get you. I wonder why people care so much about other people. I'm only interested in other people as subjects for drawing.	y
person 1	絵を描かれるんですね？素敵ですね。わたしも会社員として働いている時以外はあまり他の人に興味ないんですよね。今度あなたの絵を見せてくれませんか？	Oh, you can draw? That's cool. I'm not that interested in other people except when I'm working in the office. Will you show me some of your pictures sometime?	y
person 2	まあ、そんなこと言ってくれる人、初めて。嬉しいな、もちろん良いですよ。なんか、あなたとなら、良いお友達になれそうな気がします。	Oh, you're the first person to actually ask me. Of course, I'd be happy to. Somehow, I feel like we may become good friends.	y
