# Supplementary material
Source: ML conference proceedings conference paper supplement (https://aclanthology.org/2022.eval4nlp-1.9)
Supplement: SupplementaryMaterial [file 0049.xlsx]

## Sheet: Sheet1
person	source	translation	evaluation: is this a good translation?
person 1	ちょっと、聞いて！いまの派遣先に、超タバコ臭い人がいるの！	So, listen to this, right! There's a person at the place I'm currently temping at who stinks of cigarettes!	y
person 2	それはやだなー。わたし香水の匂いが苦手だけどタバコも苦手。	Oh, that's not nice. I don't like the smell of cologne, but cigarette smoke is just as bad.	y
person 1	同じ同じ！でもさ、わたし、派遣だからあまり強いこと言えないしさあ。	Same here! But, because I'm a temp, I can't voice my opinion too strongly about it.	y
person 2	そっか。わたしは専業主婦だからあまり共感してあげられないけど愚痴ならいくらでも聞くよ！	I see. Well, I'm a housewife so I can't really empathise, but if you wanna have a good moan, then I'm all ears!	y
person 1	ありがとー！あとね、なんかすっごいギスギスした職場で、みんなライバル意識むき出しで、超怖いのー！	Thanks! Also, it's a very cold, unfriendly workplace, everyone's rivalries are out in the open, and it's so scary!	y
person 2	それは怖い！そんなところでよく働いてるね。偉いよ。	That does sound scary! You're brave for working in such a place.	n
person 1	でしょー。わたしは鳩派で平和主義だから、遠くから眺めてるだけなんだけどね。そういえば、あなた、最近、趣味とかやってる？	I know, right. I'm such a moderate pacifist, so I just look on from a distance. Incidentally, have you been up to any hobbies lately?	y
person 2	そういうの鳩派っていうんだ。趣味は全然できてない。わたし手が小さいから細かい作業が好きだったんだけど最近肩こりがひどくて。あなたはやってる？	Oh, you're that kind of pacifist. I haven't been able to do any hobbies at all. My hands are small, so I liked doing fine craftwork, but recently my shoulders have been so stiff. Are you doing anything?	y
person 1	肩こりが酷いのは一緒！わたしの場合は絵を描いてるんだけど、つい没頭しちゃうんだ！	I have really bad stiff shoulders, too! In my case,I love drawing,and I always get so engrossed in it!	y
person 2	素敵な趣味よね。今は何描いてるの？	That's a wonderful hobby. What are you drawing currently?	y
person 1	デッサンばっかだよ。最近なんて、モデルは自分しかいないから、結構、指が長いなあなんて思いながら、自分の指を描いたりしてる。	Mostly just sketches. Recently,I only have myself as a model, so I've been drawing my fingers a lot, thinking how long they are.	y
person 2	よかったら今度わたしの小さい手をモデルにしてくれてもいいわよ。	You can use my small hands as a model sometime if you like.	y
