# Supplementary material
Source: ML conference proceedings conference paper supplement (https://aclanthology.org/2022.eval4nlp-1.9)
Supplement: SupplementaryMaterial [file 0049.xlsx]

## Sheet: Sheet1
person	source	translation	evaluation: is this a good translation?
person 1	ちょっと、聞いて！いまの派遣先に、超タバコ臭い人がいるの！	Listen to me, there's a super cigarette in the first place!	n
person 2	それはやだなー。わたし香水の匂いが苦手だけどタバコも苦手。	It smells like perfume, but I don't like cigarettes.	n
person 1	同じ同じ！でもさ、わたし、派遣だからあまり強いこと言えないしさあ。	Same as I sent you, but I can't tell you much.	n
person 2	そっか。わたしは専業主婦だからあまり共感してあげられないけど愚痴ならいくらでも聞くよ！	All right, I'm a housewife, but if you don't mind, I can't complain too much.	n
person 1	ありがとー！あとね、なんかすっごいギスギスした職場で、みんなライバル意識むき出しで、超怖いのー！	- Thanks, guys. - I'm so scared of your work.	n
person 2	それは怖い！そんなところでよく働いてるね。偉いよ。	That's what I'm doing here. That's what I'm afraid of.	n
person 1	でしょー。わたしは鳩派で平和主義だから、遠くから眺めてるだけなんだけどね。そういえば、あなた、最近、趣味とかやってる？	- You know, I'm a peaceful Jew, so I've been watching you for a while, right?	n
person 2	そういうの鳩派っていうんだ。趣味は全然できてない。わたし手が小さいから細かい作業が好きだったんだけど最近肩こりがひどくて。あなたはやってる？	You know, I don't have that kind of taste of pigeon, but I've always liked the smallest work of my own hands.	n
person 1	肩こりが酷いのは一緒！わたしの場合は絵を描いてるんだけど、つい没頭しちゃうんだ！	But if you look at me, I'm going to have a very bad painting!	n
person 2	素敵な趣味よね。今は何描いてるの？	That's a nice hobby. What are you writing now?	n
person 1	デッサンばっかだよ。最近なんて、モデルは自分しかいないから、結構、指が長いなあなんて思いながら、自分の指を描いたりしてる。	I haven't had a model in a long time, so I don't think I've ever seen a single model, and I don't think I've ever had a finger in my hand.	n
person 2	よかったら今度わたしの小さい手をモデルにしてくれてもいいわよ。	You can have my little model next time.	n
