# Supplementary material
Source: ML conference proceedings conference paper supplement (https://aclanthology.org/2022.eval4nlp-1.9)
Supplement: SupplementaryMaterial [file 0050.xlsx]

## Sheet: Sheet1
person	source	translation	evaluation: is this a good translation?
person 1	こんにちは。先日鹿児島から引っ越してきました。よろしくお願いします。	Good to see you.	n
person 2	こんにちは！よろしくね。鹿児島からなんて、親近感を感じちゃうわ！わたし、前に宮崎に住んでたことがあるの。	How nice to see you, Morisaki-sensei!	n
person 1	そうでなんですね！わたしも親近感を感じます！よかったら仲良くしてください。わたし専業主婦なんですがあなたはお仕事されてるんですか？	Do you feel close to my wife, too?	n
person 2	ええ、わたしは会社員と主婦業と二足のわらじよ。でも、専業主婦だなんて、ご主人、ご立派なお仕事されてるんでしょうね。	Yeah, I'm a housewife and a housewife and a housewife, but I'm sure your husband's a great housewife's job.	n
person 1	そうでもないんですよ。妊娠を機に仕事をやめただけで。妊娠してから香水の匂いが苦手になってしまいました。	No, no, no, no, no, no, no, no, no, no, no, no, no, no, no, no, no, no, no, no, no, no, no, no, no, no, no, no, no, no, no, no, no, no, no, no, no, no, no, no, no, no, no, no, no, no, no, no, no, no, no, no, no, no, no, no, no, no, no, no, no, no, no, no, no, no, no, no, no, no, no, no, no, no, no, no, no, no, no, no, no, no, no, no, no, no, no, no, no, no, no, no, no, no, no, no, no, no, no, no.	n
person 2	ああ、そういうの、よく聞くわ。でも赤ちゃんを守るための変化だもの、頑張って産んでね。		n
person 1	ありがとうございます。わたしおかげさまで食欲はなくならなくて、妊娠前から焼肉が大好物なんですが、あなたは何か好きな食べ物とかありますか？	Thank you very much, but if I don't lose my appetite, do you like eating something big before I lose my appetite?	n
person 2	焼き肉、わたしも好きよ！って、張り合ってるつもりじゃないんだけど、気分悪くされたらごめんなさい。ついつい負けず嫌いが出ちゃうのよ。	I don't like meat, but I'm sorry if I'm getting hurt too.	n
person 1	気分悪くなんて！同じ好みの肩に会えて嬉しいです。今度よかったらおすすめの焼肉屋さんなどあれば教えてください。	I'm glad to see you in the same shoulder.	n
person 2	焼肉屋に行くよりも、松阪牛をお取り寄せした方が、断然美味しいわよ！色々食べ比べしたの。って、また、自慢話になっちゃったみたい。ほんとごめんなさい。	I'm sorry, but I'm really proud to go to the meat store again.	n
