# Supplementary material
Source: ML conference proceedings conference paper supplement (https://aclanthology.org/2022.eval4nlp-1.9)
Supplement: SupplementaryMaterial [file 0050.xlsx]

## Sheet: Sheet1
person	source	translation	evaluation: is this a good translation?
person 1	こんにちは。先日鹿児島から引っ越してきました。よろしくお願いします。	Hello, I moved here from Kagoshima the other day. Nice to meet you.	y
person 2	こんにちは！よろしくね。鹿児島からなんて、親近感を感じちゃうわ！わたし、前に宮崎に住んでたことがあるの。	Hi there! Nice to meet you, too. If you're from Kagoshima, then I already feel a bond with you! I used to live in Miyazaki.	y
person 1	そうでなんですね！わたしも親近感を感じます！よかったら仲良くしてください。わたし専業主婦なんですがあなたはお仕事されてるんですか？	Oh really?! I sense a bond, too! We could be friends, if you like. I'm a housewife, but do you work?	y
person 2	ええ、わたしは会社員と主婦業と二足のわらじよ。でも、専業主婦だなんて、ご主人、ご立派なお仕事されてるんでしょうね。	Yes, I juggle being an office worker and a housewife. But, if you're a full-time housewife, then your husband must have a good job.	y
person 1	そうでもないんですよ。妊娠を機に仕事をやめただけで。妊娠してから香水の匂いが苦手になってしまいました。	Not really, it's just I left my job on becoming pregnant. Since becoming pregnant, I can't stand the smell of cologne.	y
person 2	ああ、そういうの、よく聞くわ。でも赤ちゃんを守るための変化だもの、頑張って産んでね。	Ah, that's something that I've often heard. But, it's just a change in your body to protect the baby, so just do your best and prepare for the birth.	y
person 1	ありがとうございます。わたしおかげさまで食欲はなくならなくて、妊娠前から焼肉が大好物なんですが、あなたは何か好きな食べ物とかありますか？	Thank you. Thankfully I haven't lost my appetite, and I've loved yakiniku since before I was pregnant; what food do you like?	y
person 2	焼き肉、わたしも好きよ！って、張り合ってるつもりじゃないんだけど、気分悪くされたらごめんなさい。ついつい負けず嫌いが出ちゃうのよ。	I like yakiniku too! Sorry, I'm not trying to compete, I hope I didn't offend you. I often become unintentionally competitive.	y
person 1	気分悪くなんて！同じ好みの肩に会えて嬉しいです。今度よかったらおすすめの焼肉屋さんなどあれば教えてください。	Offend me?! As if, I'm glad to meet somebody who likes the same things. Please let me know what yakiniku restaurants you recommend sometime.	y
person 2	焼肉屋に行くよりも、松阪牛をお取り寄せした方が、断然美味しいわよ！色々食べ比べしたの。って、また、自慢話になっちゃったみたい。ほんとごめんなさい。	Even better than going to a yakiniku restaurant is ordering out for some Matsusaka beef! I've tasted and compared various different places. Oh, it seems like I'm boasting again. I'm really sorry.	y
