# Supplementary material
Source: ML conference proceedings conference paper supplement (https://aclanthology.org/2022.eval4nlp-1.9)
Supplement: SupplementaryMaterial [file 0051.xlsx]

## Sheet: Sheet1
person	source	translation	evaluation: is this a good translation?
person 1	どうもー。お金ってさ、働いても働いても、いつの間にか無くなっちゃうよねー。	- Thank you.	n
person 2	わかる。わたし早期退職して今無職だから生きるだけでお金がかかるっていうのを実感してるよ。あなたは仕事は順調？	I'm a little out of work and now you're getting paid for your work.	n
person 1	仕事は順調だよ。でもさ、夫と私と二馬力で働いてるのに、全然貯金できないの！	But my husband and I are working together, and I can't afford to save any money!	n
person 2	何に使うことが多いの？	How many do you have to use?	n
person 1	そうだなあ。わたしって、負けず嫌いだから、たとえば友達が良いバッグを持ってると欲しくなっちゃうんだよね。こういうのって、浪費家っていうんだろうね。	Well, I don't like to lose my friends, so I'm gonna need a nice bag like this, so it's a waste of money.	n
person 2	それは治した方がいいよ。わたし最近髪の毛切って短くなったんだけどどうかな？	I think it's better to fix it.	n
person 1	いいじゃん！わたしのもかなり長くなってきたし、切っちゃおうかなー。	I've been cutting my hair for a long time now.	n
person 2	わたし社交的でいろんな人と話すんだけど髪切ったら大体の人に失恋したの？って聞かれたけど切るのはいいと思う。	I'll talk to a lot of people, but I think if I cut off my hair, I'll cut off a lot of people's hair!	n
person 1	それ！ベタすぎる！いまだにいるんだね、そんなこと聞く人！	You still have people to listen to!	n
person 2	そうなの。西日本に住んでるからそんな人が周りに多いのかな	Yes, so many people still live in Japan.	n
person 1	へえ、西日本なんだね。わたし、前に宮崎に住んでたことあるよ？あっちには行ったことある？	Oh, you've lived there before, haven't you?	n
person 2	ないの。暖かそうだし行ってみたいな。	I'd like to warm up.	n
