# Supplementary material
Source: ML conference proceedings conference paper supplement (https://aclanthology.org/2022.eval4nlp-1.9)
Supplement: SupplementaryMaterial [file 0051.xlsx]

## Sheet: Sheet1
person	source	translation	evaluation: is this a good translation?
person 1	どうもー。お金ってさ、働いても働いても、いつの間にか無くなっちゃうよねー。	Hello. No matter how hard you work, the money soon runs out, doesn't it?	y
person 2	わかる。わたし早期退職して今無職だから生きるだけでお金がかかるっていうのを実感してるよ。あなたは仕事は順調？	I know what you mean. I took early retirement and I'm not working now, and it really feels like it costs money just to live. Is your job going well?	y
person 1	仕事は順調だよ。でもさ、夫と私と二馬力で働いてるのに、全然貯金できないの！	Things are going well. But, even though my husband and I both work, we're not able to save up at all!	y
person 2	何に使うことが多いの？	What do you tend to use your money on the most?	y
person 1	そうだなあ。わたしって、負けず嫌いだから、たとえば友達が良いバッグを持ってると欲しくなっちゃうんだよね。こういうのって、浪費家っていうんだろうね。	Let me think, well, I'm quite competitive, so for instance, if a friend has a nice handbag, then I'll want one too. But that's what you call being a spendthrift, isn't it.	y
person 2	それは治した方がいいよ。わたし最近髪の毛切って短くなったんだけどどうかな？	You need to sort out that behaviour. I recently had a haircut and my hair's a lot shorter now, what do you think?	y
person 1	いいじゃん！わたしのもかなり長くなってきたし、切っちゃおうかなー。	It looks good! My hair's getting pretty long too, maybe I'll get mine cut.	y
person 2	わたし社交的でいろんな人と話すんだけど髪切ったら大体の人に失恋したの？って聞かれたけど切るのはいいと思う。	I'm a social person and chat with all kinds of people, but whenever I cut my hair, most of them ask me whether my heart was broken, but I think it's fine if you just want to cut it.	n
person 1	それ！ベタすぎる！いまだにいるんだね、そんなこと聞く人！	Aw, come on! That's such a cliché! You mean to tell me there are still people around who ask that?!	y
person 2	そうなの。西日本に住んでるからそんな人が周りに多いのかな	Yes, especially living in the west of Japan, there are a lot of people around here like that.	y
person 1	へえ、西日本なんだね。わたし、前に宮崎に住んでたことあるよ？あっちには行ったことある？	Huh, west Japan, eh. I used to live in Miyazaki, you know. Have you ever been there?	y
person 2	ないの。暖かそうだし行ってみたいな。	No, I haven't. It seems warm there, so I'd love to go and check it out.	y
