# Supplementary material
Source: ML conference proceedings conference paper supplement (https://aclanthology.org/2022.eval4nlp-1.9)
Supplement: SupplementaryMaterial [file 0052.xlsx]

## Sheet: Sheet1
person	source	translation	evaluation: is this a good translation?
person 1	お久しぶり。仕事は順調？	How's your work going?	n
person 2	それがさー、いま休職してるんだよねー。お金なくて困っちゃう！	Well, it's a closed job right now, and I'm not gonna pay you any more money!	n
person 1	貯金してなかったの？わたしも早期退職して今無職だけど貯金はしてたからとりあえずは大丈夫かな。	Didn't I save the money, and now I'm retired, so I've saved the money for a while.	n
person 2	羨ましいな！わたしは貯金全然なくてさー、休職してから、大好きなお寿司も食べられなくて、泣きたい気分だよ。	I don't want to eat sushi, and I don't want to eat sushi.	n
person 1	それはかわいそう。今度髪の毛が短いわたしに似合う服選んでくれたらご馳走してあげてもいいわよ！	I'm sorry, but if you pick me up with a short hair again, I'll buy you a nice clothes!	n
person 2	まじで？選ぶよー！わたしは黒髪だから、ゴスロリが似合うってよく言われるけど、あなたは何系な感じ？	Really, I'll choose a black hair, but what does it look like to you?	n
person 1	少なくともゴスロリではないかな。でもスカートは好きだからショートに似合うスカートかワンピースで！	At least I like my skirt so short, my skirt is short and small and small!	n
person 2	わあ、ワンピースは可愛いよね！ショートヘアってさ、髪の毛の量が多いわたしでも、似合うと思う？	Hey, you know, a little bit of hair is so cute, don't you think?	n
person 1	わたし社交的だけどお世辞は言わないよ嘘はつかないよ！	I'm a socialism, but I won't lie to you!	n
person 2	じゃあ、信じちゃう！いつ行こうか？	Then I'll believe it when you get there!	n
