# Supplementary material
Source: ML conference proceedings conference paper supplement (https://aclanthology.org/2022.eval4nlp-1.9)
Supplement: SupplementaryMaterial [file 0052.xlsx]

## Sheet: Sheet1
person	source	translation	evaluation: is this a good translation?
person 1	お久しぶり。仕事は順調？	Good to see you, how's work?	y
person 2	それがさー、いま休職してるんだよねー。お金なくて困っちゃう！	The thing is, I'm taking a leave of absence from work right now. I'm in a pickle because I don't have any money!	y
person 1	貯金してなかったの？わたしも早期退職して今無職だけど貯金はしてたからとりあえずは大丈夫かな。	Didn't you save any? I took early retirement and I'm not working now, but I did save some money, so I think I'm okay for the time being.	y
person 2	羨ましいな！わたしは貯金全然なくてさー、休職してから、大好きなお寿司も食べられなくて、泣きたい気分だよ。	I really envy you! I have no savings at all, and now I'm taking a break, I feel like crying asI can't even eat the sushi that I love.	n
person 1	それはかわいそう。今度髪の毛が短いわたしに似合う服選んでくれたらご馳走してあげてもいいわよ！	I feel sorry for you. Tell you what, if you help me pick out some clothes that suit me now I have short hair, I'll treat you to a meal!	n
person 2	まじで？選ぶよー！わたしは黒髪だから、ゴスロリが似合うってよく言われるけど、あなたは何系な感じ？	Are you serious? I'll help you choose! I'm often told that Gothic Lolita fashion would suit me because I have black hair, but what style do you like?	y
person 1	少なくともゴスロリではないかな。でもスカートは好きだからショートに似合うスカートかワンピースで！	Well, not Gothic Lolita at the very least. I like skirts though, so a skirt or a dress that goes with short hair would be good!	y
person 2	わあ、ワンピースは可愛いよね！ショートヘアってさ、髪の毛の量が多いわたしでも、似合うと思う？	Oh, a dress would be cute! Speaking of short hair, do you think it would suit me too, even though my hair is quite thick?	y
person 1	わたし社交的だけどお世辞は言わないよ嘘はつかないよ！	I might be a sociable person, but I won't flatter you nor lie to you!	y
person 2	じゃあ、信じちゃう！いつ行こうか？	Okay, I'll believe you, then! When shall we go?	y
