# Supplementary material
Source: ML conference proceedings conference paper supplement (https://aclanthology.org/2022.eval4nlp-1.9)
Supplement: SupplementaryMaterial [file 0053.xlsx]

## Sheet: Sheet1
person	source	translation	evaluation: is this a good translation?
person 1	こんにちは。髪の毛ってさ、どのぐらいのサイクルで切ってる？	Hello. How often do you cut your hair?	n
person 2	わたしは姿勢が悪いしあまり見た目に気を使わないので半年ぐらいごとにかな。あなたは？	I have bad posture and I don't really care much about my appearance, so I only get it cut once every six months or so. You?	y
person 1	半年に1回で大丈夫なの？わたしは月1回は切りに行かないと駄目なんだ。髪の毛のボリュームがあるから、早めに切らないと、すぐ爆発しちゃうの！	What, and once every six months is not a problem? I have to go for a cut every month. I have such thick hair that if I don't get it cut in good time, I end up with an afro!	y
person 2	そうなんだ。大変だね。そうだ今度の休み何してる？	Oh right. Sounds difficult to manage. Oh yeah, what are you doing next time you've got a day off?	y
person 1	休み？いまね、実は休職してるから、毎日が休みなんだよね。だから、毎日普通に過ごしてる感じ。	A day off? Well actually, I'm taking a leave of absence from work right now, so every day is a day off. So, I'm just living a normal life.	n
person 2	そうなんだ！わたし餃子作りが得意だから今度の休みうちで餃子パーティーなんてどう？	Oh, I see! Okay, well, how about a gyoza dumpling party next time I've got some time off? I'm brilliant at making gyoza dumplings.	y
person 1	それ、絶対行く！餃子作りが得意ってことは、まさかの宇都宮出身だったりして？	Yeah, I'll definitely go to that! If you're good at making gyoza dumplings, then are you from Utsunomiya by any chance?	y
person 2	正解！今も関東に住んでるよ。誘ったはいいけどあなたは今どこに住んでるんだっけ？	That's right, I am! I still live in the Kanto region, even now. I'd love to invite you, but whereabouts do you live again?	y
person 1	わたしは今は北陸だよ。でも毎日暇してるから、関東まで行けるよ！	I live in Hokuriku now. But, I've got nothing to do every day, so I'm able to go down to Kanto!	y
person 2	そうだったんだ！？遠いのにありがとう！でも久しぶりにあなたに会えるの楽しみにしてる！	Oh you do?! I appreciate that you're willing to come from so far away! I'm really looking forward to seeing you after all this time!	y
