# Supplementary material
Source: ML conference proceedings conference paper supplement (https://aclanthology.org/2022.eval4nlp-1.9)
Supplement: SupplementaryMaterial [file 0053.xlsx]

## Sheet: Sheet1
person	source	translation	evaluation: is this a good translation?
person 1	こんにちは。髪の毛ってさ、どのぐらいのサイクルで切ってる？	Hi, how long has your hair been cut off?	n
person 2	わたしは姿勢が悪いしあまり見た目に気を使わないので半年ぐらいごとにかな。あなたは？	I don't look so good in six months, so you don't look so good every month?	n
person 1	半年に1回で大丈夫なの？わたしは月1回は切りに行かないと駄目なんだ。髪の毛のボリュームがあるから、早めに切らないと、すぐ爆発しちゃうの！	I have to go in a month, because I have to cut the hair off in a month!	n
person 2	そうなんだ。大変だね。そうだ今度の休み何してる？	Yeah, it's tough. What are you doing next week?	n
person 1	休み？いまね、実は休職してるから、毎日が休みなんだよね。だから、毎日普通に過ごしてる感じ。	Well, I'm actually resting now, but it feels like I've spent the whole day out of work.	n
person 2	そうなんだ！わたし餃子作りが得意だから今度の休みうちで餃子パーティーなんてどう？	Yeah, well, I'm good at making my own pools, so what do you think about this party at the end of the day?	n
person 1	それ、絶対行く！餃子作りが得意ってことは、まさかの宇都宮出身だったりして？	You sure you're good at going to Akasaka, huh?	n
person 2	正解！今も関東に住んでるよ。誘ったはいいけどあなたは今どこに住んでるんだっけ？	I've been asking you to go east, but where are you living now?	n
person 1	わたしは今は北陸だよ。でも毎日暇してるから、関東まで行けるよ！	I'm in the North land now, but I can go east every day!	n
person 2	そうだったんだ！？遠いのにありがとう！でも久しぶりにあなたに会えるの楽しみにしてる！	Well, thank you very much, but it's been a long time since I've seen you!	n
