# Supplementary material
Source: ML conference proceedings conference paper supplement (https://aclanthology.org/2022.eval4nlp-1.9)
Supplement: SupplementaryMaterial [file 0054.xlsx]

## Sheet: Sheet1
person	source	translation	evaluation: is this a good translation?
person 1	お久しぶりですね。わたしは春に大学院を卒業したんです！	It's been a while since I graduated school in spring!	n
person 2	お久しぶり！大学院まで出たなんて、尊敬しちゃいます。わたしは高校を出てすぐ就職したから。	It's been a long time since I got out of high school.	n
person 1	自分で言うのもなんですが、わたしは努力家だと思います。でも早くから働いてるあなたも十分すごいですよ。	I think you're doing great work, too, but I'm pretty good at what I do.	n
person 2	褒めてくれてありがとう。努力家ってことは、もしかして見た目も真面目系？	Thank you for your compliment. Is it really real?	n
person 1	そうかも。よくも悪くも頭良さそうって言われるかな。姿勢も悪いし。でもこれって褒めてないですよね？	I don't think that would be a bad idea, but this is not a compliment, is it?	n
person 2	えー、褒めてる、褒めてる！わたしなんて、ヤンキーみたいな茶髪だからなー！	I'm a compliment, like a Janka!	n
person 1	わたしも一度それくらい明るい色に染めてみようかな。あなたが住んでる地域は派手な人が多いんですか？	Do I have a lot of people living in such a light?	n
person 2	うん、多いかも。ヒョウ柄着てるおばちゃんとかいるもん。しかも、わたしなんて、コッテコテの関西弁だしね。	Well, maybe I'm talking about a lot of women in the West, and I'm talking about a lot of women.	n
person 1	てことは関西の方なんですね。わたしは昔から関東に住んでるんですがヒョウ柄を着てる人はみたことないな。	I used to live in Kandaka, but I've never seen a man wear hibernation before.	n
person 2	ピンポン！大正解！関東ってさ、みんなお上品なイメージだけど、あなたみたいに真面目な人が多いの？	You guys are so serious, aren't you?	n
