# Supplementary material
Source: ML conference proceedings conference paper supplement (https://aclanthology.org/2022.eval4nlp-1.9)
Supplement: SupplementaryMaterial [file 0054.xlsx]

## Sheet: Sheet1
person	source	translation	evaluation: is this a good translation?
person 1	お久しぶりですね。わたしは春に大学院を卒業したんです！	Good to see you. I finished my postgraduate in the spring!	y
person 2	お久しぶり！大学院まで出たなんて、尊敬しちゃいます。わたしは高校を出てすぐ就職したから。	Yeah, long time, no see! I admire the fact that you went all the way to grad school, because I got a job right after high school.	y
person 1	自分で言うのもなんですが、わたしは努力家だと思います。でも早くから働いてるあなたも十分すごいですよ。	Well, I think I'm a hard worker, if I do say so myself. You're pretty awesome as well though, starting work from an early age.	y
person 2	褒めてくれてありがとう。努力家ってことは、もしかして見た目も真面目系？	Thanks for the compliment. If you're so studious, does that mean you look serious, too?	y
person 1	そうかも。よくも悪くも頭良さそうって言われるかな。姿勢も悪いし。でもこれって褒めてないですよね？	Probably. People say I look smart, though I don't know whether that's good or bad. I have the accompanying bad posture. But, they're not complimenting me, are they?	n
person 2	えー、褒めてる、褒めてる！わたしなんて、ヤンキーみたいな茶髪だからなー！	No, it's a compliment! I mean look at me: hair all dyed brown like a chav!	n
person 1	わたしも一度それくらい明るい色に染めてみようかな。あなたが住んでる地域は派手な人が多いんですか？	Maybe I should try dying my hair that light one time. Are there a lot of extravagantly attired people in your area?	y
person 2	うん、多いかも。ヒョウ柄着てるおばちゃんとかいるもん。しかも、わたしなんて、コッテコテの関西弁だしね。	Yeah, I'd say there's probably a lot. You see old ladies going around in leopard print. And I speak with a strong Kansai accent.	n
person 1	てことは関西の方なんですね。わたしは昔から関東に住んでるんですがヒョウ柄を着てる人はみたことないな。	The means your from the Kansai region, right? I've lived in the Kanto region for ages, and I've never seen anyone dressed in leopard print.	n
person 2	ピンポン！大正解！関東ってさ、みんなお上品なイメージだけど、あなたみたいに真面目な人が多いの？	Ding ding ding! That's correct! I thought everyone in the Kanto region was sophisticated, but are there lots of serious people like you?	y
