# Supplementary material
Source: ML conference proceedings conference paper supplement (https://aclanthology.org/2022.eval4nlp-1.9)
Supplement: SupplementaryMaterial [file 0055.xlsx]

## Sheet: Sheet1
person	source	translation	evaluation: is this a good translation?
person 1	ねえ、ちょっと話、聞いてくれる？	Hey, can I talk to you for a moment?	y
person 2	どうしたの？	What's up?	y
person 1	彼氏がさあ、わたしの関西弁をすごく嫌がるんだよね。オバチャンみたいっていうの。	My boyfriend can't bear it when I speak in my Kansai dialect. He says I sound like an old woman.	y
person 2	わたしは近畿に地方に住んでるから全然そんなこと思わないけどそれちょっとひどいね	Well I live in a rural part of the Kinki region, so I don't think you sound anything like an old woman, so that's a bit harsh of him.	n
person 1	ひどいよねー！でもさ、高卒で、しかも気分屋のわたしと付き合ってくれる男性なんて、そうそういないしなあ。	Yeah, he's so mean! But, then again, I don't think there are many guys who would date a moody person like me who only graduated from high school.	y
person 2	関係ないと思うけどな。わたしは大卒だけど同級生は高卒の子と結婚したよ。とりあえず元気出して！	I don't think stuff like that matters, though. I'm a university graduate, but I know someone in my class who married someone who only graduated from high school. Just cheer up!	y
person 1	ありがとう！あ！そういえば、もっと酷いことを言われたの思い出しちゃった！	Thanks! Oh! While we're talking about it, I just remembered something else he said that was worse!	y
person 2	さらに！？	That wasn't it?!	y
person 1	デートで、茶色の髪の毛に合わせて、ヒョウ柄のタンクトップ着ていったら、おまえは女豹かってツッコまれた。	Once, on a date, I was wearing a leopard print tank top that went with my brown hair, and he made a remark asking if I was trying to be voluptuous.	n
person 2	うーん、、それはフォローできないかなー。でもツッコミができる彼は悪くないんじゃない？	Hmmm, well, I can't cheer you up, I'm afraid. But he can't be that bad if he's able to joke like that, right?	y
person 1	そう？そうかな？わたしたちカップルって、これからもうまくやっていけると思う？	You think so? I wonder. Do you think a couple like us will continue to get on with each other?	n
person 2	意外にお似合いなのかもね！	I think you guys are surprisingly well suited for each other!	y
