# Supplementary material
Source: ML conference proceedings conference paper supplement (https://aclanthology.org/2022.eval4nlp-1.9)
Supplement: SupplementaryMaterial [file 0055.xlsx]

## Sheet: Sheet1
person	source	translation	evaluation: is this a good translation?
person 1	ねえ、ちょっと話、聞いてくれる？	Hey, can I talk to you for a second?	y
person 2	どうしたの？	What's going on?	y
person 1	彼氏がさあ、わたしの関西弁をすごく嫌がるんだよね。オバチャンみたいっていうの。	My boyfriend doesn't like me very much.	n
person 2	わたしは近畿に地方に住んでるから全然そんなこと思わないけどそれちょっとひどいね	I live near the capital, but it's not that bad.	n
person 1	ひどいよねー！でもさ、高卒で、しかも気分屋のわたしと付き合ってくれる男性なんて、そうそういないしなあ。	It's not so bad, but it's not like I'm dating a guy who likes to be my high school teacher.	n
person 2	関係ないと思うけどな。わたしは大卒だけど同級生は高卒の子と結婚したよ。とりあえず元気出して！	I don't think it's any of your business, but I'm married to a high school student anyway!	n
person 1	ありがとう！あ！そういえば、もっと酷いことを言われたの思い出しちゃった！	Thank you, that's a lot worse!	n
person 2	さらに！？	Again?	n
person 1	デートで、茶色の髪の毛に合わせて、ヒョウ柄のタンクトップ着ていったら、おまえは女豹かってツッコまれた。	In a date with brown hair, when you went to the top of a brown tank, you said you were a bitch.	n
person 2	うーん、、それはフォローできないかなー。でもツッコミができる彼は悪くないんじゃない？	Well, it can't be that bad, can it?	n
person 1	そう？そうかな？わたしたちカップルって、これからもうまくやっていけると思う？	Do you think we can work it out now?	n
person 2	意外にお似合いなのかもね！	I think we're gonna make it work!	n
