# Supplementary material
Source: ML conference proceedings conference paper supplement (https://aclanthology.org/2022.eval4nlp-1.9)
Supplement: SupplementaryMaterial [file 0056.xlsx]

## Sheet: Sheet1
person	source	translation	evaluation: is this a good translation?
person 1	やっぱりわたしって八方美人だよね。	So, I am someone who tries to please everybody after all.	n
person 2	え？そうかな？誰かから、なにか言われた？	Huh? Are you? Someone said that to you?	n
person 1	自分でつくづく思っただけ。あなたは周りから指摘されたこととかある？	It's just something that I've come to realise. Has anybody ever said something like that to you?	y
person 2	んー、なにか言われてるかもしれないけど、全然記憶にないな。わたしって、自分大好き人間だから、人の言うことなんて気にしないの。	Um, somebody might have said something like that once, but I really don't remember. I'm a bit of a narcissist, so I don't care what other people say.	n
person 1	いい性格だよ。羨ましい。わたしなんて最近白髪が目立ってきてほんといやになる。	That's a good personality trait to have, I'm jealous. Conversely, I'm starting to get visible grey hairs, and I hate it.	n
person 2	白髪は、見つけるとテンション下がるよねー。若白髪ってこと？	Finding a white day sure does put a damper on one's day. Do you mean you're going prematurely grey?	n
person 1	そう。この前なんて、わたし目鼻立ちがはっきりしてるから結構声かけられるんだけど、白髪が目に入ったみたいで距離取られちゃったのよ。	Yeah. People start up a conversation with me quite often because I have well-defined features, but the other day people kept their distance because I think they noticed my grey hair.	y
person 2	うわ、それはショックだわー！いっそのこと、わたしみたいに、髪の毛にメッシュ入れて染めたら、気にならなくなるんじゃない？	Yikes, that must have been a shock! Wouldn't it be better to put highlights in your hair and dye it, like I do, and then you'll stop caring about it?	n
person 1	そこまでは思い切れないなー。でもわたしが住んでる近畿にはそんな人結構いるかも	I don't think I'd go that far, though I think there are a fair number of people in Kinki who would.	n
person 2	へえ、近畿なんだね。えっと、、、ごめん。近畿ってどの辺？わたしは四国なんだけど。	Oh, you're in Kinki? Um... Sorry, whereabouts is Kinki? I'm in Shikoku.	y
person 1	すぐ近くだよ！もしかして地理苦手？	It's very close! Are you not good with geography, by any chance?	y
person 2	バレたかー！超苦手。だって、わたしの白い脳みそは、大好きなうどんで出来てるんだもの！なんちゃって！	You got it! Yeah, I'm actually really bad at it. It's because my white brain is actually made of delicious udon noodles! Just kidding!	y
