# Supplementary material
Source: ML conference proceedings conference paper supplement (https://aclanthology.org/2022.eval4nlp-1.9)
Supplement: SupplementaryMaterial [file 0056.xlsx]

## Sheet: Sheet1
person	source	translation	evaluation: is this a good translation?
person 1	やっぱりわたしって八方美人だよね。	I mean, I'm a pretty girl, right?	n
person 2	え？そうかな？誰かから、なにか言われた？	Did someone say anything?	n
person 1	自分でつくづく思っただけ。あなたは周りから指摘されたこととかある？	Did you just think that you were being pointed around yourself?	n
person 2	んー、なにか言われてるかもしれないけど、全然記憶にないな。わたしって、自分大好き人間だから、人の言うことなんて気にしないの。	Well, I may be saying something, but I don't really care about people who love me anymore.	n
person 1	いい性格だよ。羨ましい。わたしなんて最近白髪が目立ってきてほんといやになる。	You're a good guy, and I've been looking at white hair lately.	n
person 2	白髪は、見つけるとテンション下がるよねー。若白髪ってこと？	And when I find my hair, I'm gonna get my hair back.	n
person 1	そう。この前なんて、わたし目鼻立ちがはっきりしてるから結構声かけられるんだけど、白髪が目に入ったみたいで距離取られちゃったのよ。	Yeah, well, last time I heard my nose, I couldn't hear my nose, so I took my hair off the face like a white hair.	n
person 2	うわ、それはショックだわー！いっそのこと、わたしみたいに、髪の毛にメッシュ入れて染めたら、気にならなくなるんじゃない？	What if it doesn't feel like I have to get a haircut?	n
person 1	そこまでは思い切れないなー。でもわたしが住んでる近畿にはそんな人結構いるかも	I can't remember that much, but there's a lot of people around here that I live in.	n
person 2	へえ、近畿なんだね。えっと、、、ごめん。近畿ってどの辺？わたしは四国なんだけど。	Oh, I'm sorry, but where am I from?	n
person 1	すぐ近くだよ！もしかして地理苦手？	It's near here, isn't it?	n
person 2	バレたかー！超苦手。だって、わたしの白い脳みそは、大好きなうどんで出来てるんだもの！なんちゃって！	You know, I don't like white brains, you know?	n
