# Supplementary material
Source: ML conference proceedings conference paper supplement (https://aclanthology.org/2022.eval4nlp-1.9)
Supplement: SupplementaryMaterial [file 0057.xlsx]

## Sheet: Sheet1
person	source	translation	evaluation: is this a good translation?
person 1	ねえねえ！最近さー、また一段と体重が増えちゃったんだよね。	You'll never guess what! Recently, I've put on even more weight.	y
person 2	そうなんだ？わたし自分のことにも他の人のことにも鈍感だからわからなかったよ。	You have? I'm oblivious to myself and other people, so I hadn't noticed.	y
person 1	うーん。実は最近、朝昼晩、うどんを食べてるから、そのせいだと思うんだ。	Hmm. The thing is, recently I've been eating udon noodles for breakfast,lunch and dinner, so I think that's probably to blame.	y
person 2	そんなに好きなの！？まあわたしも三食ラーメンでもいいくらいラーメン好きだから気持ちわからなくもないけどさ。	You must really like them! Well, I like ramen so much that I could eat it for three meals a day, so I can kind of understand.	y
person 1	あなたはラーメン派なんだね。わたしのうどん好きは、生まれつきだよ。なにせ、うどんの国、四国で生まれ育ったんだもん！	You prefer ramen? I'm an udon lover, through and through. After all, I grew up in Shikoku, the home of udon!	y
person 2	やっぱり生まれたところと好物って関連するよね。わたしも生まれも今住んでるとこも九州だから！ラーメンは豚骨にかぎる！	The foods that people like tend to be connected to the place where they're from after all, right. For instance, I was born in Kyushu and still live there today, so when it comes to ramen, it has to be tonkotsu!	y
person 1	ああ、そういうことかあ。豚骨ラーメンって、髪の毛にも良さそうだよね。ツヤツヤになりそうだと思わない？	Ah, I see what you mean. I've heard that tonkotsu ramen is supposed to be good for your hair. Doesn't it just seem like it will make your hair glossy?	y
person 2	それはどうかな。髪の毛痛んでるの？	I'm not sure about that, to be honest. Why, do you have damaged hair?	y
person 1	うん。ストレートで、ずっと伸ばしてるんだけど、枝毛が気になっちゃって。	Yeah. My hair is straight and it's always been long, but I'm worried about split ends.	y
person 2	わたしもパーマかけてるから枝毛気になるのすごくわかる！	I have a perm, so I can sympathise with your concern over split ends!	y
person 1	そうなんだ！じゃあさ、豚骨ラーメンを1日3食食べて、髪の毛に効果があるか試してみてよ！	Is that so! Well then, you should test whether eating tonkotsu ramen for three meals a day has any effect on your hair!	y
person 2	多分ないと思うけど試してみる！	Probably not, but I'll give it a try!	y
