# Supplementary material
Source: ML conference proceedings conference paper supplement (https://aclanthology.org/2022.eval4nlp-1.9)
Supplement: SupplementaryMaterial [file 0057.xlsx]

## Sheet: Sheet1
person	source	translation	evaluation: is this a good translation?
person 1	ねえねえ！最近さー、また一段と体重が増えちゃったんだよね。	Hey, you've been losing weight lately, haven't you?	n
person 2	そうなんだ？わたし自分のことにも他の人のことにも鈍感だからわからなかったよ。	Well, I didn't know what else to do with me either.	n
person 1	うーん。実は最近、朝昼晩、うどんを食べてるから、そのせいだと思うんだ。	Well, actually, I've been eating that night since the day.	n
person 2	そんなに好きなの！？まあわたしも三食ラーメンでもいいくらいラーメン好きだから気持ちわからなくもないけどさ。	Well, I don't know how much I love ramen, but I don't know how much I love ramen.	n
person 1	あなたはラーメン派なんだね。わたしのうどん好きは、生まれつきだよ。なにせ、うどんの国、四国で生まれ育ったんだもん！	You're a Khalasar, and how much I love to grow up in the country!	n
person 2	やっぱり生まれたところと好物って関連するよね。わたしも生まれも今住んでるとこも九州だから！ラーメンは豚骨にかぎる！	I still love being born in Shiite, because I'm born in Shiite!	n
person 1	ああ、そういうことかあ。豚骨ラーメンって、髪の毛にも良さそうだよね。ツヤツヤになりそうだと思わない？	Oh, that sounds good, don't you think?	n
person 2	それはどうかな。髪の毛痛んでるの？	I don't know. Do you have any hair pain?	n
person 1	うん。ストレートで、ずっと伸ばしてるんだけど、枝毛が気になっちゃって。	Yeah, I've been hanging straight, but I feel like a branch in the back.	n
person 2	わたしもパーマかけてるから枝毛気になるのすごくわかる！	I can see that branch too!	n
person 1	そうなんだ！じゃあさ、豚骨ラーメンを1日3食食べて、髪の毛に効果があるか試してみてよ！	Oh, well, eat the bone, eat the bone, and try the hair!	n
person 2	多分ないと思うけど試してみる！	Maybe I won't!	n
