# Supplementary material
Source: ML conference proceedings conference paper supplement (https://aclanthology.org/2022.eval4nlp-1.9)
Supplement: SupplementaryMaterial [file 0058.xlsx]

## Sheet: Sheet1
person	source	translation	evaluation: is this a good translation?
person 1	前から思っていたんですけど、高校中退してるわたしと話してて退屈しませんか？	You haven't talked to me since you left high school, have you?	n
person 2	全然ですよ。わたしも大学を途中で辞めちゃってますからね。似たようなものです！	Not at all, because I quit college too.	n
person 1	よかったです。しかもわたし鈍感だからいつのまにか人を不快にさせてることもあるみたいで。	And I feel like I'm getting a little shaved up, too.	n
person 2	えー、そんなことないと思うけどなあ。そういうのって、誰かに言われたりする？	Well, I don't think anyone would say that, do you?	n
person 1	遠回しに言われたことあるのかもしれないけど鈍感だからわかんなくて。だからあなたも思ったことがあったら遠慮なく言ってくださいね。	I may have been told that if you had any idea what you were thinking, why don't you just say so yourself?	n
person 2	いや、わたしからは言うことは何もないですよ。わたしなんて、仕切りたがりのせいで、すぐ人と衝突して会社を辞めてばかりいるんですから。	No, I'm just saying that I'm out of line right now because I'm out of line, and I quit.	n
person 1	そうなんですか？落ち込んだ時ってどうしてるんですか？	What are you doing down there when you're depressed?	n
person 2	いまはフリーで仕事してるので、日本中を転々と、気ままに放浪したりしてますね。あなたは？	So now you're working on a job in Cooby, and you're out of Japan, right?	n
person 1	すごいなあ。わたしはラーメンが好きなのでラーメンを大盛りで食べたらもう元気になれます。放浪してると言うことは九州には来たことありますか？	You know, when I say I like ramen, how are you doing in Shigeru?	n
person 2	九州はまだないです！やっぱり九州のラーメンは旨いですか？	Are you still in the state of Shikoku?	n
