# Supplementary material
Source: ML conference proceedings conference paper supplement (https://aclanthology.org/2022.eval4nlp-1.9)
Supplement: SupplementaryMaterial [file 0058.xlsx]

## Sheet: Sheet1
person	source	translation	evaluation: is this a good translation?
person 1	前から思っていたんですけど、高校中退してるわたしと話してて退屈しませんか？	I've been wondering this for a while, but don't you get bored talking to a high school dropout like me?	y
person 2	全然ですよ。わたしも大学を途中で辞めちゃってますからね。似たようなものです！	Not at all. Like, I also quite university partway through, so I'm in a similar situation!	n
person 1	よかったです。しかもわたし鈍感だからいつのまにか人を不快にさせてることもあるみたいで。	Well, that's comforting to hear. The thing is though, I'm quite oblivious to things, so it seems there have been times when I've made people uncomfortable without realising.	y
person 2	えー、そんなことないと思うけどなあ。そういうのって、誰かに言われたりする？	Huh, that's probably not true. Has somebody told you something to that effect?	y
person 1	遠回しに言われたことあるのかもしれないけど鈍感だからわかんなくて。だからあなたも思ったことがあったら遠慮なく言ってくださいね。	They might have implied it in a roundabout way, but I was too oblivious to realise. So, please don't hesitate to tell me if you ever had the same thought.	y
person 2	いや、わたしからは言うことは何もないですよ。わたしなんて、仕切りたがりのせいで、すぐ人と衝突して会社を辞めてばかりいるんですから。	No, I don't have anything to say. Take me for instance, I'm a bit of a control freak, so at work I soon get into conflicts with colleagues and end up quitting my job.	n
person 1	そうなんですか？落ち込んだ時ってどうしてるんですか？	Oh really? What do you do when you're feeling sad?	n
person 2	いまはフリーで仕事してるので、日本中を転々と、気ままに放浪したりしてますね。あなたは？	Well, now I work freelance, so I roam carefree all over Japan. How about you?	y
person 1	すごいなあ。わたしはラーメンが好きなのでラーメンを大盛りで食べたらもう元気になれます。放浪してると言うことは九州には来たことありますか？	That sounds great. I like ramen, so I usually feel better after eating a big bowl of it. You said you've been roaming around, so have you ever been to Kyushu?	y
person 2	九州はまだないです！やっぱり九州のラーメンは旨いですか？	No, I still haven't been to Kyushu! Is ramen from Kyushu nice like everyone says?	y
