# Supplementary material
Source: ML conference proceedings conference paper supplement (https://aclanthology.org/2022.eval4nlp-1.9)
Supplement: SupplementaryMaterial [file 0059.xlsx]

## Sheet: Sheet1
person	source	translation	evaluation: is this a good translation?
person 1	こんにちは。最近はどんなことをされてますか？	Hello. What have you done lately?	n
person 2	最近は新卒で入社した今の会社で働き詰めです。おかげでいつも寝不足ですよ。あなたは？	Lately, I worked in a new school, and you're always tired of sleeping in a new school.	n
person 1	勤め人は大変だね。わたしは、何度も転職した結果、自由気ままなフリーランスが性に合ってるってことが分かったよ。	You know, I've been working hard on my job for a long time, and I know I'm a free man.	n
person 2	フリーランスかあ。かっこいいなあ。わたしは我慢強いのだけが取り柄だから今の会社でもう少し頑張ろうと思ってるよ。	I'm just trying to be a little more specific in the company right now.	n
person 1	えらいなあ。わたしの場合は、敵を作るタイプなんだよねー。原因は多分、わたしにあるんだろうけど。。。	Look, if I were you, I'd make a lot of enemies, but I'm probably not.	n
person 2	そんなにきつい性格だったかな？	Was it that hard?	n
person 1	んー、性格っていうか、リーダーシップを取るのが、自分では得意だと思ってるんだけど、大学中退のくせに偉そうにしてって感じる人も多いみたい。	Well, I mean, you think you're good at taking a leadership leadership, but you're pretty good at it, too, and you're too good at it.	n
person 2	ひがみだね。でもそういう人ってどこにでもいるんだよね。性に合うものが見つかってよかったじゃん！	But I'm glad you found something like that!	n
person 1	ありがとう！そう言ってくれると気が晴れるよ。ところで、最近旅行とかしてる？	Thank you for saying that, by the way, are you traveling like that recently?	n
person 2	全然できてないよー。あなたはしてる？	I can't do that. Are you doing it?	n
			y
