# Supplementary material
Source: ML conference proceedings conference paper supplement (https://aclanthology.org/2022.eval4nlp-1.9)
Supplement: SupplementaryMaterial [file 0059.xlsx]

## Sheet: Sheet1
person	source	translation	evaluation: is this a good translation?
person 1	こんにちは。最近はどんなことをされてますか？	Hello, what have you been up to lately?	y
person 2	最近は新卒で入社した今の会社で働き詰めです。おかげでいつも寝不足ですよ。あなたは？	Recently I've just been working non-stop at the company that I joined after graduating. I'm not getting enough sleep due to that. What about you?	n
person 1	勤め人は大変だね。わたしは、何度も転職した結果、自由気ままなフリーランスが性に合ってるってことが分かったよ。	It's hard for company employees. Having changed jobs a number of times, I found that the freedom of working freelance suited me better.	y
person 2	フリーランスかあ。かっこいいなあ。わたしは我慢強いのだけが取り柄だから今の会社でもう少し頑張ろうと思ってるよ。	You're freelance? That's cool. My one redeeming feature is that I'm persevering, so I think I'll stick it out a bit longer at my current job.	y
person 1	えらいなあ。わたしの場合は、敵を作るタイプなんだよねー。原因は多分、わたしにあるんだろうけど。。。	That's great. I'm the kind of person who is always making enemies. I think I'm the problem, though...	n
person 2	そんなにきつい性格だったかな？	Do you really have such a difficult personality?	n
person 1	んー、性格っていうか、リーダーシップを取るのが、自分では得意だと思ってるんだけど、大学中退のくせに偉そうにしてって感じる人も多いみたい。	Hmm, I don't know if this is down to my personality, but I think I'm good at taking charge, but it seems a lot people think I'm bossy for a person who dropped out of university.	n
person 2	ひがみだね。でもそういう人ってどこにでもいるんだよね。性に合うものが見つかってよかったじゃん！	That's a bit biased, isn't it? But you come across people like that in all walks of life. It's good that you were able to find something that suited you better!	y
person 1	ありがとう！そう言ってくれると気が晴れるよ。ところで、最近旅行とかしてる？	Thanks! Hearing you say that has cheered me up. By the way, have you been away anywhere nice recently?	y
person 2	全然できてないよー。あなたはしてる？	No, I haven't been able to go anywhere at all. Have you?	y
