# Supplementary material
Source: ML conference proceedings conference paper supplement (https://aclanthology.org/2022.eval4nlp-1.9)
Supplement: SupplementaryMaterial [file 0060.xlsx]

## Sheet: Sheet1
person	source	translation	evaluation: is this a good translation?
person 1	ねえわたしのくせ毛どうにかならないかな？	Hey, do you think there's anything that I can do about my unruly hair?	y
person 2	くせ毛って、手に負えなくて大変だよね。食べ物とかも影響してるのかな？	Unruly hair is hard to manage, isn't it? Perhaps your diet affects it?	y
person 1	そうなのかな？本当に美容師泣かせでさ。わたしも毎日泣きそうになるよ。	I wonder if that's the case? I'm the bane of hairdressers everywhere. It makes me want to cry every day.	n
person 2	かわいそう！ストパーをかけたりしないの？会社や学校で、そういうのって禁止されてたりする？	Oh, you poor thing! Have you not tried a straight perm? Or is that not allowed at school or at work?	y
person 1	禁止はされてないんだけど、今の会社には新卒で入社してからこの髪の毛だからむしろトレードマークみたいになっててさ。	It's not prohibited, but ever since I started at my company as a fresh graduate, this hair of mine has almost become like a trademark.	n
person 2	ああ、そういうことかあ。わたしの会社も、フレックス勤務だし、そういう社則も緩めなほうだけど、中途のわたしはできるだけ目立たないようにしてるよ。	Oh, I see. My company also operates flexible hours and the company rules are not strict about things like that, but because I was hired mid-career, I try to make sure that I don't stand out.	y
person 1	そういうのやっぱり気にするんだね。わたしは今東日本に住んでるんだけど思ってたよりみんなフレンドリーでこの髪型もいい意味でいじってくれるんだよね。	People do worry over that sort of thing, don't they. I live over in east Japan now, and everyone is a lot more friendly than I was expecting, and people like to make fun of my hair, in a good way.	y
person 2	それは良かったじゃない！わたしって、実際は頑固だから、会社で、猫かぶって大人しくしてるの大変よー！	Well, that's good then! I'm pretty stubborn, to tell the truth, so it's hard for me to feign innocence and be quiet at work!	y
person 1	どっかで発散した方がいいね。わたしいつも寝不足だけどあなたのためだったら電話でも食事でも付き合うわよ！	You should find yourself an outlet. I'm not getting enough sleep, but if it helps you out, I don't mind chatting on the phone or going out for a meal!	n
person 2	食事！いいね、わたしの出身地の名物、牛タンを出してる良いお店を知ってるよ！興味ある？	A meal! That sounds great, I know a good place that serves beef tongue, which is a local specialty where I'm from! Interested?	y
