# Supplementary material
Source: ML conference proceedings conference paper supplement (https://aclanthology.org/2022.eval4nlp-1.9)
Supplement: SupplementaryMaterial [file 0060.xlsx]

## Sheet: Sheet1
person	source	translation	evaluation: is this a good translation?
person 1	ねえわたしのくせ毛どうにかならないかな？	Hey, is there something wrong with my hair?	n
person 2	くせ毛って、手に負えなくて大変だよね。食べ物とかも影響してるのかな？	It's too much hair, isn't it? Is it affected or food?	n
person 1	そうなのかな？本当に美容師泣かせでさ。わたしも毎日泣きそうになるよ。	Are you sure I'm gonna cry, too?	n
person 2	かわいそう！ストパーをかけたりしないの？会社や学校で、そういうのって禁止されてたりする？	Don't you feel sorry for the big boys or the school?	n
person 1	禁止はされてないんだけど、今の会社には新卒で入社してからこの髪の毛だからむしろトレードマークみたいになっててさ。	I'm not allowed to be in school, but as far as I'm concerned, my company is getting into a new school, and I'm in a better position than this shirt.	n
person 2	ああ、そういうことかあ。わたしの会社も、フレックス勤務だし、そういう社則も緩めなほうだけど、中途のわたしはできるだけ目立たないようにしてるよ。	Yeah, well, my company is working on Frex, but as far as I can tell, it's not as easy as it gets.	n
person 1	そういうのやっぱり気にするんだね。わたしは今東日本に住んでるんだけど思ってたよりみんなフレンドリーでこの髪型もいい意味でいじってくれるんだよね。	That's right, I live in Japan now, but everybody thinks that this is better than all French hair.	n
person 2	それは良かったじゃない！わたしって、実際は頑固だから、会社で、猫かぶって大人しくしてるの大変よー！	That's why I'm so stubborn, and I wear a cat in my company!	n
person 1	どっかで発散した方がいいね。わたしいつも寝不足だけどあなたのためだったら電話でも食事でも付き合うわよ！	If you don't mind, if you don't want to go out there and have dinner with me all the time, you can't call me!	n
person 2	食事！いいね、わたしの出身地の名物、牛タンを出してる良いお店を知ってるよ！興味ある？	Good, because you know what my cattle call me, right?	n
