# Supplementary material
Source: ML conference proceedings conference paper supplement (https://aclanthology.org/2022.eval4nlp-1.9)
Supplement: SupplementaryMaterial [file 0061.xlsx]

## Sheet: Sheet1
person	source	translation	evaluation: is this a good translation?
person 1	この数日、寒波がすごいですね。寒いのは平気なほうですか？	The cold spell we've been having these past few days is dreadful, isn't it? Do you not mind the cold?	y
person 2	わたしは暑い地域で生まれ育ったので寒いのは本当に苦手なんです。あなたは平気なんですか？	I grew up in a warm area, so I can't really handle the cold. Does it not bother you?	n
person 1	ええ、わたしは寒い地域の生まれなので、このぐらいへっちゃらです。ご存じかなあ、牛タンで有名なところなんですけど。	That's right, I'm from a cold place, so this level doesn't bother me at all. Perhaps you know the place, it's famous for its beef tongue.	n
person 2	羨ましいな。牛タンということは仙台ですか？	Lucky you. If it's famous for beef tongue, is it Sendai?	y
person 1	大正解です！もしかして、いらしたことはありますか？	That's correct! Perhaps you've been there before?	y
person 2	ないんですよ。なんだか寒そうだし。	No, I haven't; it seems like it's cold there.	y
person 1	おっしゃるとおり、寒いです。寒いせいで、口を開かないというか無口な人も多くて、わたしなんて無口で頑固な嫌なオヤジですよ！	That's right, it is cold. There's a lot of untalkative people here as well, because we don't like to open our mouths in the cold, and I'm the most untalkative, stubborn, grumpy old guy of all!	y
person 2	そうですか？そんな印象なかったですけどね。わたしは普段はおしゃべりな方なんですけど、熱中しやすい方で、何かに集中すると無口になっちゃいます。	Are you? That's not the impression I got. I'm usually talkative, but I get absorbed in things easily, so when I'm concentrating on something I clam up.	y
person 1	ほほう。たとえば、最近は、どんなことに熱中してますか？	Uh-huh. What kind of things do you become absorbed in, recently, for instance?	y
person 2	最近は宝塚にお熱ですよ。実はわたし演劇部に入っていたので宝塚の芝居をみると疼くんですよね。	Currently, I'm really into the Takarazuka Revue. I was actually in the drama club at school, and I swoon whenever I see a Takarazuka performance.	n
