# Supplementary material
Source: ML conference proceedings conference paper supplement (https://aclanthology.org/2022.eval4nlp-1.9)
Supplement: SupplementaryMaterial [file 0061.xlsx]

## Sheet: Sheet1
person	source	translation	evaluation: is this a good translation?
person 1	この数日、寒波がすごいですね。寒いのは平気なほうですか？	This cold waves are amazing, isn't it?	n
person 2	わたしは暑い地域で生まれ育ったので寒いのは本当に苦手なんです。あなたは平気なんですか？	I'm really not really very good with cold food because I grew up in the hot area, are you?	n
person 1	ええ、わたしは寒い地域の生まれなので、このぐらいへっちゃらです。ご存じかなあ、牛タンで有名なところなんですけど。	Yeah, well, I was born in the cold area, so I'm famous for these cattle.	n
person 2	羨ましいな。牛タンということは仙台ですか？	What do you expect to envy?	n
person 1	大正解です！もしかして、いらしたことはありますか？	Have you ever done anything you want?	n
person 2	ないんですよ。なんだか寒そうだし。	No, it's cold.	n
person 1	おっしゃるとおり、寒いです。寒いせいで、口を開かないというか無口な人も多くて、わたしなんて無口で頑固な嫌なオヤジですよ！	Yes, it's cold and cold, and I don't want to talk too much, Dad!	n
person 2	そうですか？そんな印象なかったですけどね。わたしは普段はおしゃべりな方なんですけど、熱中しやすい方で、何かに集中すると無口になっちゃいます。	Well, I didn't seem to be that kind of person, but I feel like I'm having a hard time keeping my mouth shut, so...	n
person 1	ほほう。たとえば、最近は、どんなことに熱中してますか？	So, what's going on lately?	n
person 2	最近は宝塚にお熱ですよ。実はわたし演劇部に入っていたので宝塚の芝居をみると疼くんですよね。	It's been a long time since I've been in the Gump Theatre Theatre, so I'm going to try and act.	n
