# Supplementary material
Source: ML conference proceedings conference paper supplement (https://aclanthology.org/2022.eval4nlp-1.9)
Supplement: SupplementaryMaterial [file 0062.xlsx]

## Sheet: Sheet1
person	source	translation	evaluation: is this a good translation?
person 1	お疲れ様です！あ、ごめんなさいわたし声大きですよね。	Hello! Oh, sorry, my voice is a little loud, isn't it?	n
person 2	はい！ちょっとビックリしちゃいました。わたし、弱虫なんです。こんな自分から早く脱却したいんですけど。	Yes! You made me jump a little. I'm a bit of a coward, you see. I want to overcome it as soon as possible, though.	y
person 1	わたし演劇部に入っていたのでつい声張っちゃって、うるさいってよく言われるんです。あなたも大声で話してみたら変わるかもしれませんよ？	I used to be in the drama club at school, and I end up unconsciously projecting my voice, and people tell me that I'm being loud. Maybe things would change if you spoke up as well?	n
person 2	なるほどー。わたしはよく周りから、のんびりしてるねーって言われるんですけど、そういう性格も声の大きさと関係があると思いますか？	I see, well the people around me often tell me that I'm laid-back, but do you think that one's personality is related to the loudness of one's voice?	y
person 1	それは関係ないかもしれません。演劇部にのんびりな子もいましたし。あなたは劇とか見ますか？	I think they're probably unrelated. For instance, there was a laid-back kid in drama club, too. Do you watch plays and other performances?	y
person 2	いいえ、わたしは演劇とか芸術には疎くて。あなたは今は、プロの役者さんなんですか？	No, I'm not really familiar with the theatre or the arts. Are you a professional actor now?	y
person 1	いいえ。今はただのサラリーマンです。でも演劇は今でも好きでよく見に行くんですけど、わたしすごく涙もろくてすぐ泣いてしまうんですよね。	No. I'm just a regular office worker. I still enjoy the theatre though, and I often go to see performances, but I'm so sentimental that I'm soon moved to tears.	y
person 2	涙もろいって、心が柔らかい証拠だし、素敵なことだと思います。サラリーマンやってて、転職したいと思ったことはないんですか？	I think it's good to be sentimental, it shows you are tender-hearted. As an office worker, have you ever considered changing jobs?	y
person 1	仕事に不満はないので今のところないですが、わたし暑い地域で生まれ育ったのでもう少し冬が厳しくないところで働きたいとは思いますね。あなたは転職願望があるんですか？	Not so far, as I have no complaints with this job; however, I grew up in a warm area, so I kinda want to work somewhere where the winters are a little less harsh. Do you want to have a career change?	n
person 2	ええ。新卒で就職してからずっと同じところで勤めているので、もう少し冒険をした方が良いのかなあと思っているところです。	Yes. I've been working in the same place since I graduated university, but I feel like my life should have a little more adventure in it.	y
