# Supplementary material
Source: ML conference proceedings conference paper supplement (https://aclanthology.org/2022.eval4nlp-1.9)
Supplement: SupplementaryMaterial [file 0062.xlsx]

## Sheet: Sheet1
person	source	translation	evaluation: is this a good translation?
person 1	お疲れ様です！あ、ごめんなさいわたし声大きですよね。	I'm sorry, I'm a big voice.	n
person 2	はい！ちょっとビックリしちゃいました。わたし、弱虫なんです。こんな自分から早く脱却したいんですけど。	Oh, my God, I'm so scared. I just want to get out of here quickly.	n
person 1	わたし演劇部に入っていたのでつい声張っちゃって、うるさいってよく言われるんです。あなたも大声で話してみたら変わるかもしれませんよ？	I was in the theater, so you could talk and talk and talk, too?	n
person 2	なるほどー。わたしはよく周りから、のんびりしてるねーって言われるんですけど、そういう性格も声の大きさと関係があると思いますか？	- Well, I don't think it's that big of a thing to say, but I don't think it's that simple, do you?	n
person 1	それは関係ないかもしれません。演劇部にのんびりな子もいましたし。あなたは劇とか見ますか？	Maybe it's none of your business. Have you seen a little girl at the theater?	n
person 2	いいえ、わたしは演劇とか芸術には疎くて。あなたは今は、プロの役者さんなんですか？	No, I'm not an artist now, are you, Mr. Allen?	n
person 1	いいえ。今はただのサラリーマンです。でも演劇は今でも好きでよく見に行くんですけど、わたしすごく涙もろくてすぐ泣いてしまうんですよね。	No, I'm just a patriesman right now, but I still love to watch them cry so quickly.	n
person 2	涙もろいって、心が柔らかい証拠だし、素敵なことだと思います。サラリーマンやってて、転職したいと思ったことはないんですか？	Do you think it's nice to think that you want to do something nice, that you don't want to do anything about it, do you?	n
person 1	仕事に不満はないので今のところないですが、わたし暑い地域で生まれ育ったのでもう少し冬が厳しくないところで働きたいとは思いますね。あなたは転職願望があるんですか？	I'm not complaining about work right now, so I grew up here in the hot area, so you want to work a little more than work for the winter.	n
person 2	ええ。新卒で就職してからずっと同じところで勤めているので、もう少し冒険をした方が良いのかなあと思っているところです。	Yeah, well, you know, you've been working a lot better at your new job, don't you?	n
