# Supplementary material
Source: ML conference proceedings conference paper supplement (https://aclanthology.org/2022.eval4nlp-1.9)
Supplement: SupplementaryMaterial [file 0063.xlsx]

## Sheet: Sheet1
person	source	translation	evaluation: is this a good translation?
person 1	こんにちは！もうすぐ土用の丑の日ですね。ウナギはお好きですか？	Hello! The traditional time for eating eel is nearly upon us. Do you like eel?	y
person 2	そういえばそうですね。うなぎ好きですよ。あなたも？	Now you mention it, it is coming up, isn't it. Yes, I do like eel, do you?	n
person 1	はい！大好きです。わたしは年中温暖な気候といわれる、浜松の出身なので、ウナギが名物でソウルフードでもあるんですよ。	Yes! I love it. I'm from Hamamatsu, where it's warm all year round, so eel is the local specialty, and it's a soul food for me.	y
person 2	もちろん知ってますよ！だから土用の丑の日を覚えてたんですね。わたしは高地で育ったので温暖な機構のところには憧れがあるんですよね。	Well, of course I know that! So that's why you remembered that it was time to eat eel. I grew up in the highlands, so I've always wished to be in warmer climes.	n
person 1	高地ですか。それって、寒いだけじゃなくて、空気が薄かったりもしませんか？	The highlands? Is it true that it's not only cold, but the air is thinner too?	y
person 2	そうかもしれません。わたしは昔からジョギングが趣味なのですが、そんなに苦しいと思ったことありませんからね。	Probably. I've always jogged as a hobby, but I've never found it particularly gruelling.	y
person 1	わあ、すごいですね。わたしは弱虫なので、空気が薄いと聞いただけで不安になります。そういう自分が本当は嫌なんです。	Wow, that's amazing. I'm a bit of a coward, so just hearing that the air is thinner makes me feel uneasy. I hate that I'm such a wuss.	n
person 2	何事もやって見たら変わりますよ。日課を変えるとか。何か日課とかありますか？	You'll change if you try lots of different things. You could change your daily routine, for instance. Do you have a daily routine?	y
person 1	日課ですかあ。人によく、のんびりしてる性格と言われるほど時間にルーズなので、毎日決まった時間に何かするということはないですねー。	A daily routine? Well, I'm not very strict about time, to the point that other people often say that I have a laid-back personality, so it's not like I have a set time every day that I do a specific thing.	y
person 2	じゃあそれを変えていきましょう！わたしは朝にお弁当を作るのが日課なんですが、そういう些細なことから始めてみましょう！	Then that's what you should change! My daily routine is making my lunch in the morning, so you can start from really trivial things like that!	n
person 1	えらい！自分で毎日お弁当づくりですか。わたしにもできるのかな、頑張ってみようかな、どうしよう。	Great! Do you make your own lunch every day? I wonder if I could do that too; maybe I'll give it a go.	n
person 2	何事も最初の一歩ですよ！	Well, everything starts from the first step!	y
