# Supplementary material
Source: ML conference proceedings conference paper supplement (https://aclanthology.org/2022.eval4nlp-1.9)
Supplement: SupplementaryMaterial [file 0063.xlsx]

## Sheet: Sheet1
person	source	translation	evaluation: is this a good translation?
person 1	こんにちは！もうすぐ土用の丑の日ですね。ウナギはお好きですか？	Hello. Do you like Utivich?	n
person 2	そういえばそうですね。うなぎ好きですよ。あなたも？	Yes, I do. You like to wake up?	n
person 1	はい！大好きです。わたしは年中温暖な気候といわれる、浜松の出身なので、ウナギが名物でソウルフードでもあるんですよ。	Yes, I love it, because I love it when it's called global warming, and I love it when it's called the Sequoia food.	n
person 2	もちろん知ってますよ！だから土用の丑の日を覚えてたんですね。わたしは高地で育ったので温暖な機構のところには憧れがあるんですよね。	Of course you remember the day I grew up in global warming!	n
person 1	高地ですか。それって、寒いだけじゃなくて、空気が薄かったりもしませんか？	It's not only cold and it's not cold, is it?	n
person 2	そうかもしれません。わたしは昔からジョギングが趣味なのですが、そんなに苦しいと思ったことありませんからね。	Maybe so, but I've never felt like jogging so much.	n
person 1	わあ、すごいですね。わたしは弱虫なので、空気が薄いと聞いただけで不安になります。そういう自分が本当は嫌なんです。	Well, that's really why I'm so scared of the air, so I'm really scared.	n
person 2	何事もやって見たら変わりますよ。日課を変えるとか。何か日課とかありますか？	What happens when you see something unusual changed?	n
person 1	日課ですかあ。人によく、のんびりしてる性格と言われるほど時間にルーズなので、毎日決まった時間に何かするということはないですねー。	It's the day that people say it's getting better every day, so it's not gonna take much time to figure out what time it's gonna be.	n
person 2	じゃあそれを変えていきましょう！わたしは朝にお弁当を作るのが日課なんですが、そういう些細なことから始めてみましょう！	So let's change it to the small lunch class!	n
person 1	えらい！自分で毎日お弁当づくりですか。わたしにもできるのかな、頑張ってみようかな、どうしよう。	I don't know what to do, but let's do it every day.	n
person 2	何事も最初の一歩ですよ！	It's the first step!	n
