# Supplementary material
Source: ML conference proceedings conference paper supplement (https://aclanthology.org/2022.eval4nlp-1.9)
Supplement: SupplementaryMaterial [file 0064.xlsx]

## Sheet: Sheet1
person	source	translation	evaluation: is this a good translation?
person 1	あなたは二重で大きな目をしてますよね。	You've got a big eye for two weight.	n
person 2	そうですかねー。目はそうかもしれませんが、鼻が低いので、全体としては不細工でしょう？	Well, that may be because your eyes may be low, but the whole nose would be useless, wouldn't they?	n
person 1	そんなことないですよ。わたしは切れ長の目ですが自慢に思ってますし。考えようですよ。	No, I think I'm proud of my eyes.	n
person 2	いいですね！そういう考え方は見習いたいのですが、自意識過剰なので、みんながわたしの鼻に注目してる気がしてならないんです。	Look, I want to think about that, but if everyone's watching too much, they don't care about their own nose.	n
person 1	そんなに気にすることないと思いますけどね。わたしは証券マンで営業をしていますがあまりお世辞は言わないんですよ。	I don't think that's such a good idea, but I'm very flattered about the case.	n
person 2	そうなんですか！営業してるのにお世辞を言わず、正直でいられるってすごいですね。商社勤めのわたしも見習いたいと思います。	Well, I'd like to be honest with you, but I'd like to be honest with you, too.	n
person 1	ある意味わたしのスタイルですね。商社だとお忙しいでしょう。休みのひはなにをしてらっしゃるんですか？	What do you mean, you're busy working on my style?	n
person 2	休みの日は、家でノンビリとテレビを見たりしてます。あ、唯一、給料日のあとの休日は違いますけど！	The only day after the holidays, the only day I see the TV is the day after school!	n
person 1	家で過ごされる派なんですね。わたしはジョギングをするのが趣味なんです。給料日の後の休日、気になるなあ。	You know, I'm a joker who'll be working at home for the rest of my day after the holidays.	n
person 2	その日だけは、ステーキハウスに行って、ステーキを食べることにしてるんです。月に1回、ご馳走をいただける日なんですよ。	That day, I'm gonna go to the house and get a steak.	n
