# Supplementary material
Source: ML conference proceedings conference paper supplement (https://aclanthology.org/2022.eval4nlp-1.9)
Supplement: SupplementaryMaterial [file 0064.xlsx]

## Sheet: Sheet1
person	source	translation	evaluation: is this a good translation?
person 1	あなたは二重で大きな目をしてますよね。	You have large eyes and creased eyelids.	n
person 2	そうですかねー。目はそうかもしれませんが、鼻が低いので、全体としては不細工でしょう？	Do I indeed? Maybe my eyes are like that, but I have a stubby nose, so the overall effect is pretty unattractive, right?	y
person 1	そんなことないですよ。わたしは切れ長の目ですが自慢に思ってますし。考えようですよ。	That's not true. I have almond-shaped eyes, but it's something I'm proud of. Maybe you should consider it that way.	y
person 2	いいですね！そういう考え方は見習いたいのですが、自意識過剰なので、みんながわたしの鼻に注目してる気がしてならないんです。	That sounds good! I'd like to emulate your way of thinking, but I'm too self-conscious. I can't stop thinking that everyone is fixated on my nose.	y
person 1	そんなに気にすることないと思いますけどね。わたしは証券マンで営業をしていますがあまりお世辞は言わないんですよ。	Don't worry too much about it. I work as a salesman at a securities company, but I don't usually butter people up.	y
person 2	そうなんですか！営業してるのにお世辞を言わず、正直でいられるってすごいですね。商社勤めのわたしも見習いたいと思います。	Oh really? I'm amazed that you can work as a salesman and be frank instead of flattering people. I wish I could be more like you at the trading company where I work.	y
person 1	ある意味わたしのスタイルですね。商社だとお忙しいでしょう。休みのひはなにをしてらっしゃるんですか？	You could say it's my way of doing things. You must be busy working at a trading company. What do you do on your days off?	y
person 2	休みの日は、家でノンビリとテレビを見たりしてます。あ、唯一、給料日のあとの休日は違いますけど！	When I have a day off I like to relax at home watching TV shows. Although it's a different matter entirely if it's a day off after payday!	y
person 1	家で過ごされる派なんですね。わたしはジョギングをするのが趣味なんです。給料日の後の休日、気になるなあ。	Ah, so you're someone who likes to spend time at home. I like to go jogging. I'm intrigued about what you get up to on your days off after payday.	y
person 2	その日だけは、ステーキハウスに行って、ステーキを食べることにしてるんです。月に1回、ご馳走をいただける日なんですよ。	On those days, I've made it a habit to go to a steakhouse and eat steak. It's the one day a month when I treat myself.	y
