# Supplementary material
Source: ML conference proceedings conference paper supplement (https://aclanthology.org/2022.eval4nlp-1.9)
Supplement: SupplementaryMaterial [file 0065.xlsx]

## Sheet: Sheet1
person	source	translation	evaluation: is this a good translation?
person 1	こんにちは！最近どうですか？ぼちぼちやってますか？	Hi! Hey, how's it going? You getting by?	n
person 2	ええ。変わらず鉄道マンをしてますよ。あなたは？いや、あなた風に聞くと、儲かってまっか？	Yeah, nothing's different, I'm still a railway worker. And yourself? Or, to put it like you did, how's business?	n
person 1	ハハハ！まあ、なんとか食べていける程度には。わたしは商社に勤めてるんですが、鉄道マンってカッコイイですね！	Hahaha! Yeah, I'm somehow making enough to put food on the table. I work at a trading company, but a railway worker is such a cool job!	y
person 2	商社の方が華がありますよ！そういえばわたしこの前尊敬する坂本龍馬の足跡を尋ねようと思って土佐に行ってきたんです。行ったことありますか？	I think a trading company has more glamour to it! Oh yeah, so recently, I went to Tosa because I wanted to trace the footsteps of Ryoma Sakamoto, who's a figure I look up to. Have you ever been?	y
person 1	へえ！わたしは行ったことないです。歴史に興味があるんですか？	Oh cool! I've never been. Are you interested in history then?	y
person 2	そうなんです。歴史書を読んでいたらハマりまして。あなたは最近ハマってるものとかないですか？	That's right. I got the bug after reading a history book. Is there anything that you've been really into recently?	y
person 1	ハマっていると言えば、ステーキを食べることぐらいですね。とはいって、めったに食べられないご馳走であることには変わりありませんが！	The only thing that I'm really into is eating steak. Although, saying that, it's just a rare treat!	n
person 2	ステーキは確かにご馳走ですよね。団地暮らしのわたしにはなかなか手が出せないなあ。	Steak is definitely more of a treat, isn't it? It's not something that someone like me living on a housing estate can regularly afford.	y
person 1	団地って、いっぱい人が住んでいるでしょう？人間関係とか、大変じゃないですか？	Do a lot of people live on the housing estate? Isn't it hard keeping up relations with your neighbours?	y
person 2	まあ慣れれば快適なもんですよ。あなたは今どこにお住まいなんですか？	Well, it's quite pleasant there when you get used to it. Whereabouts do you live now?	y
person 1	わたしは今は長崎です。生まれたのは、少し離れた離島なんですが、働き口が無くてね。	I'm in Nagasaki now. I was born on one of the outlying islands, but there weren't any employment opportunities there.	y
person 2	長崎かー修学旅行で行ったことを思い出すなあ。	Nagasaki? I remember going there on a school trip.	y
