# Supplementary material
Source: ML conference proceedings conference paper supplement (https://aclanthology.org/2022.eval4nlp-1.9)
Supplement: SupplementaryMaterial [file 0065.xlsx]

## Sheet: Sheet1
person	source	translation	evaluation: is this a good translation?
person 1	こんにちは！最近どうですか？ぼちぼちやってますか？	How are you doing lately?	n
person 2	ええ。変わらず鉄道マンをしてますよ。あなたは？いや、あなた風に聞くと、儲かってまっか？	Yeah, I'm running trains, and you want to hear how much money you get?	n
person 1	ハハハ！まあ、なんとか食べていける程度には。わたしは商社に勤めてるんですが、鉄道マンってカッコイイですね！	Well, I'm pretty cool at the train station!	n
person 2	商社の方が華がありますよ！そういえばわたしこの前尊敬する坂本龍馬の足跡を尋ねようと思って土佐に行ってきたんです。行ったことありますか？	I've been trying to respect the old ravens tracks before!	n
person 1	へえ！わたしは行ったことないです。歴史に興味があるんですか？	Oh, you ever been to history?	n
person 2	そうなんです。歴史書を読んでいたらハマりまして。あなたは最近ハマってるものとかないですか？	Yes, if you read history, do you ever wonder what it's like to be an actor?	n
person 1	ハマっていると言えば、ステーキを食べることぐらいですね。とはいって、めったに食べられないご馳走であることには変わりありませんが！	If you say you're in the middle of something, you won't be able to eat steak often!	n
person 2	ステーキは確かにご馳走ですよね。団地暮らしのわたしにはなかなか手が出せないなあ。	I'm sure the steak will be nice to me.	n
person 1	団地って、いっぱい人が住んでいるでしょう？人間関係とか、大変じゃないですか？	A lot of people live here, don't they?	n
person 2	まあ慣れれば快適なもんですよ。あなたは今どこにお住まいなんですか？	Well, it's a nice place for you to live now.	n
person 1	わたしは今は長崎です。生まれたのは、少し離れた離島なんですが、働き口が無くてね。	I'm Izaki now, but I'm a little far away from the island, and I'm not working.	n
person 2	長崎かー修学旅行で行ったことを思い出すなあ。	I remember going on a trip or something for a long time.	n
