# Supplementary material
Source: ML conference proceedings conference paper supplement (https://aclanthology.org/2022.eval4nlp-1.9)
Supplement: SupplementaryMaterial [file 0066.xlsx]

## Sheet: Sheet1
person	source	translation	evaluation: is this a good translation?
person 1	わたしは今川のそばに住んでるんですけど、よかったら遊びにきませんか？	I live by the river now, would you like to come and visit sometime?	y
person 2	いいですねー。川のそばだと、夏は風が通って涼しそうですね！	That sounds good. You must get cool breezes in the summer if you're beside the river.	y
person 1	そうなんですよ。団地暮らしになるんですが立地がよかったもんでここに移ってきたんです。	Yes, I mean, I live on a housing estate, but it's such a good location that that we moved here.	n
person 2	なるほど！団地のように集合住宅だと、冬も暖かいって聞きます。保険の外交で団地にはよく行きますが、みなさん、狭くても上手に工夫されて住んでますよね！	I see! I've heard that housing complexes like that are also warm in the winter. I often visit housing estates on insurance sales calls, and even though people don't have the most space, everyone living there uses the space available resourcefully!	n
person 1	そうなんですよ。わたし集中力があるので没頭すると耳に音が入ってこないので騒音で悩まされたこともないですし。あなたは実家ですか？	That’s right. I have great concentration, and when I immerse myself in what I'm doing, I don't hear anything, so I'm not bothered by noise or anything. Do you live in your parents' home?	y
person 2	いえ、実家ではないのですが、実家と同じ広島県内に住んでますよ！	No, not at my parents' house, but I do live in Hiroshima prefecture where my parents' house is!	y
person 1	そうでしたか！広島もいいところですよね。	Oh really?! Hiroshima is a nice place, too.	y
person 2	はい！なんと言っても、お好み焼きが美味しいですしねー！	Yes! The okonomiyaki here are to die for!	n
person 1	わたしの尊敬する人が坂本龍馬なもんでよく四国のあたりを旅行するんですが、お好み焼きもそうで寿司本当に美味しいものが多いですよね。	I often travel round Shikoku and that area because I admire Ryoma Sakamoto, and it's not only the okonomiyaki pancakes, there really are lots of delicious kinds of sushi there, too.	n
person 2	ええ、本当に。でも、お好み焼きって料理の1つに数えていいんですかね？わたし、お好み焼き以外は、料理全般、苦手なんです。	Yes, absolutely. But, does okonomiyaki really count as cooking though? Besides okonomiyaki, I'm no good at cooking.	n
person 1	お好み焼きが十分料理に数えていいでしょう！切って混ぜて焼くんですから！	Yes, of course okonomiyaki counts as cooking! You chop the ingredients, mix them together and cook it!	y
person 2	たしかに！これからは料理できるって、人に言うことにします！	That's true! From now on, I shall tell people that I can cook then!	y
