# Supplementary material
Source: ML conference proceedings conference paper supplement (https://aclanthology.org/2022.eval4nlp-1.9)
Supplement: SupplementaryMaterial [file 0066.xlsx]

## Sheet: Sheet1
person	source	translation	evaluation: is this a good translation?
person 1	わたしは今川のそばに住んでるんですけど、よかったら遊びにきませんか？	I live near the river right now, but would you like to come and play with me?	y
person 2	いいですねー。川のそばだと、夏は風が通って涼しそうですね！	You know, summer is so cool when the wind comes through the river!	n
person 1	そうなんですよ。団地暮らしになるんですが立地がよかったもんでここに移ってきたんです。	Yes, but it's a good place to live here!	n
person 2	なるほど！団地のように集合住宅だと、冬も暖かいって聞きます。保険の外交で団地にはよく行きますが、みなさん、狭くても上手に工夫されて住んでますよね！	Well, as you can see, the winter house is as warm as the old house, and winter is warm and warm and warm, and we're all going to the insurance company!	n
person 1	そうなんですよ。わたし集中力があるので没頭すると耳に音が入ってこないので騒音で悩まされたこともないですし。あなたは実家ですか？	So you're not listening to the sound of my husband, are you?	n
person 2	いえ、実家ではないのですが、実家と同じ広島県内に住んでますよ！	No, it's not home, but I live in the same island as my parents!	n
person 1	そうでしたか！広島もいいところですよね。	Well, it's a nice island, too!	n
person 2	はい！なんと言っても、お好み焼きが美味しいですしねー！	Yes, I like it when you say it.	n
person 1	わたしの尊敬する人が坂本龍馬なもんでよく四国のあたりを旅行するんですが、お好み焼きもそうで寿司本当に美味しいものが多いですよね。	Some people are really good at traveling around four little dragon horses, but they're really good.	n
person 2	ええ、本当に。でも、お好み焼きって料理の1つに数えていいんですかね？わたし、お好み焼き以外は、料理全般、苦手なんです。	Yeah, but I really like to count on one of those cooking, and I'm really good at cooking all the food.	n
person 1	お好み焼きが十分料理に数えていいでしょう！切って混ぜて焼くんですから！	I'm good. I'm good at cooking!	n
person 2	たしかに！これからは料理できるって、人に言うことにします！	I'll tell the people we can cook!	n
