# Supplementary material
Source: ML conference proceedings conference paper supplement (https://aclanthology.org/2022.eval4nlp-1.9)
Supplement: SupplementaryMaterial [file 0067.xlsx]

## Sheet: Sheet1
person	source	translation	evaluation: is this a good translation?
person 1	こんにちは！つかぬことを質問しますが、人としゃべる時って、あなたはどこに視線をやりますか？	Hello, I asked you where do you look when you talk to people?	n
person 2	わたしの尊敬する父は人の目をみて話せと言っていたのでわたしも目を見て話すようにしています。あなたは違うんですか？	My father tells you not to look me in the eye, does he?	n
person 1	お父様の教えは素敵ですね。わたしは、口元を見て話すんですよ。わたしの周りの人もそういう人が多いのか、唇がセクシーねってよく言われます。	My father used to tell me that I'm a very attractive person, too.	n
person 2	セクシーだから見ながら話す？へー面白い意見ですね。わたしは外資系企業に勤めているのですが、社員に外国人もいて、彼らってすごく目を見て話すんですよね。	That's why I work in a foreign company, but I don't even know who they are!	n
person 1	ああ、そう言われるとそうかも知れませんね。なんて、知ったかぶりしてみました！わたしは、基本的に日本人相手の仕事なので。	Yeah, well, I'm pretty sure they've been very interested in the Japanese business!	n
person 2	そうなんですね？どんなお仕事をしてるか聞いてもいいですか？	Do you have any idea what I do?	n
person 1	ええ。しがない保険外交員ですよ。どうですか？1つ、保険に入っときます？	Yeah, I'm a insurance contractor. What do you think?	n
person 2	うーん保険はすでに入ってるものがあるんですよね。すみません。そういえば、わたしが住んでるアパートにもよく保険外交員がきているような気がするな。	Well, I'm sorry, but there's a lot of insurance in my apartment already.	n
person 1	そうでしたか！ところで、あなた、好きな食べ物とかありますか？	By the way, you like food or something?	n
person 2	わたしはカツ丼が好きです。わたしにとってはお袋の味でもあるんですよね。あなたは？	I like Ktse, and you're my mother's taste, too, aren't you?	n
person 1	カツ丼ですか！受験の日の朝ごはんのイメージです。わたしは、故郷の味でもある、お好み焼きが好きです。	I like the way I taste about my breakfast, and I like the way I eat it in the morning.	n
person 2	ということは、大阪か広島の出身ですね？	Are you from Nagano?	n
