# Supplementary material
Source: ML conference proceedings conference paper supplement (https://aclanthology.org/2022.eval4nlp-1.9)
Supplement: SupplementaryMaterial [file 0067.xlsx]

## Sheet: Sheet1
person	source	translation	evaluation: is this a good translation?
person 1	こんにちは！つかぬことを質問しますが、人としゃべる時って、あなたはどこに視線をやりますか？	Hi! If you don't mind me asking, where do you focus your gaze when you're talking to someone?	y
person 2	わたしの尊敬する父は人の目をみて話せと言っていたのでわたしも目を見て話すようにしています。あなたは違うんですか？	My father, whom I respect, told me to look into a person's eyes when I speak to them, so that's what I try to do. Do you do something different?	n
person 1	お父様の教えは素敵ですね。わたしは、口元を見て話すんですよ。わたしの周りの人もそういう人が多いのか、唇がセクシーねってよく言われます。	What your father told you is great advice. I tend to look at the person's mouth when I'm talking to them. I think maybe a lot of the people I know are also like that, because I'm often told that my lips are sexy.	n
person 2	セクシーだから見ながら話す？へー面白い意見ですね。わたしは外資系企業に勤めているのですが、社員に外国人もいて、彼らってすごく目を見て話すんですよね。	Do they look at your lips whilst speaking because they're sexy? Huh, that's an interesting thought. I work at a foreign-owned company, and some of my colleagues are from other countries, and they always look you in the eye when they speak to you.	y
person 1	ああ、そう言われるとそうかも知れませんね。なんて、知ったかぶりしてみました！わたしは、基本的に日本人相手の仕事なので。	Oh yeah, that's probably true, now you come to mention it. I'm just pretending I know what you're talking about! I mostly just deal with Japanese people.	n
person 2	そうなんですね？どんなお仕事をしてるか聞いてもいいですか？	Oh, fair enough. Can I ask what kind of job you do?	y
person 1	ええ。しがない保険外交員ですよ。どうですか？1つ、保険に入っときます？	Yes, I'm just a humble insurance salesman, so, how about it? Do you want to sign up for some insurance?	n
person 2	うーん保険はすでに入ってるものがあるんですよね。すみません。そういえば、わたしが住んでるアパートにもよく保険外交員がきているような気がするな。	Hmmm, well, I already have insurance. Sorry. Now that you mention it, it seems like insurance salespeople are always coming round the apartment building where I live.	y
person 1	そうでしたか！ところで、あなた、好きな食べ物とかありますか？	You don't say! Incidentally, do you have a favourite food?	y
person 2	わたしはカツ丼が好きです。わたしにとってはお袋の味でもあるんですよね。あなたは？	I like pork cutlets over rice. For me, it's like the food that my mum used to make. How about you?	y
person 1	カツ丼ですか！受験の日の朝ごはんのイメージです。わたしは、故郷の味でもある、お好み焼きが好きです。	Oh, pork cutlets over rice? For me, that makes me think of what you have for breakfast on the morning of an exam. I like savoury okonomiyaki pancakes, which is the taste of my hometown.	n
person 2	ということは、大阪か広島の出身ですね？	So that must mean you're from either Osaka or Hiroshima, right?	y
