# Supplementary material
Source: ML conference proceedings conference paper supplement (https://aclanthology.org/2022.eval4nlp-1.9)
Supplement: SupplementaryMaterial [file 0068.xlsx]

## Sheet: Sheet1
person	source	translation	evaluation: is this a good translation?
person 1	こんにちは。また会いましたね。	Hi. So, we meet again.	y
person 2	あら、ほんとですね！お住まいが近くなのかしら？	Oh, you're right! Do you live nearby, by any chance?	y
person 1	ええ。このスーパーの近くのアパートに住んでるんですよ。あなたもこの辺りにお住まいなんですか？	Yeah, I live in an apartment not far from this supermarket. Do you live in this area, too?	y
person 2	ええ。わたしは少し先のコンビニの近くです。お互い、お店が近いと、普段便利ですよね！	Yes, I live near the convenience store that's a little further down the road. It's convenient for us, both living close to shops, isn't it!	n
person 1	そうなんですよね。わたし外資系企業に勤めてるんですが、残業が多くて料理する気になれないから助かってます。	You're right. It really helps me out because I work at a foreign-owned company and there's a lot of overtime, so I don't feel like cooking when I get home.	y
person 2	すごく分かります！わたしが勤めてる会社もIT系なので、激務で嫌になっちゃいます！	I sympathise entirely! I work at an IT company, and I get fed up with all the hard work!	n
person 1	お互い忙しいですよね。あなたは自炊されてますか？	Sounds like we're both busy. Do you cook for yourself?	y
person 2	それがねえ、お恥ずかしながら、大体いつも、コンビニ弁当です。あなたは？	Well, I'm ashamed to admit that I tend to always buy a convenience store bento box. How about you?	y
person 1	そこも同じですね。久しぶりに母のカツ丼が食べたいなあ。わたしにとってのお袋の味なんですよ。あなたにもありますか？そういうの。	We're the same in that regard, too. I really wanna eat my mum's pork cutlets over rice, I haven't had them for ages. That was my favourite of my mum's home cooking. Do you have something like that too?	n
person 2	うーん、わたしは母も忙しい人だったので、あまりお袋の味って思いつきません。そのかわり、甘いものには目がないですよ！	Hmmm, well my mum was also busy person, so I can't really think of anything that she cooked. Rather, I'm a sucker for sweet things!	y
person 1	そうなんですね！今度あなたのおすすめを教えてください。	I see! You'll have to tell me what you recommend sometime.	n
person 2	ええ、いいですよ！そこのコンビニで、一番美味しいコンビニスイーツをご紹介しますね！	Yeah, sure! I'll show you which are the best sweets at that convenience store!	n
