# Supplementary material
Source: ML conference proceedings conference paper supplement (https://aclanthology.org/2022.eval4nlp-1.9)
Supplement: SupplementaryMaterial [file 0068.xlsx]

## Sheet: Sheet1
person	source	translation	evaluation: is this a good translation?
person 1	こんにちは。また会いましたね。	Hello. Nice to see you again.	y
person 2	あら、ほんとですね！お住まいが近くなのかしら？	Oh, really? Are you from around here?	n
person 1	ええ。このスーパーの近くのアパートに住んでるんですよ。あなたもこの辺りにお住まいなんですか？	Yeah, you live in this superlab too?	n
person 2	ええ。わたしは少し先のコンビニの近くです。お互い、お店が近いと、普段便利ですよね！	Yeah, I'm just a little closer to the convenience store, and we're usually close to the store!	n
person 1	そうなんですよね。わたし外資系企業に勤めてるんですが、残業が多くて料理する気になれないから助かってます。	Yeah, well, I work for an extravagant company, but I'm not going to be able to cook a lot of work.	n
person 2	すごく分かります！わたしが勤めてる会社もIT系なので、激務で嫌になっちゃいます！	I'm very busy with both of us, so the company doesn't want to be a big fan of mine!	n
person 1	お互い忙しいですよね。あなたは自炊されてますか？	You're both busy, aren't you?	n
person 2	それがねえ、お恥ずかしながら、大体いつも、コンビニ弁当です。あなたは？	Hey, it's a convenience store all the time, all the time.	n
person 1	そこも同じですね。久しぶりに母のカツ丼が食べたいなあ。わたしにとってのお袋の味なんですよ。あなたにもありますか？そういうの。	That's what my mother would like to eat, too?	n
person 2	うーん、わたしは母も忙しい人だったので、あまりお袋の味って思いつきません。そのかわり、甘いものには目がないですよ！	Well, I've been busy too, so I don't think my mother's taste is so sweet!	n
person 1	そうなんですね！今度あなたのおすすめを教えてください。	Well, let me give you your word next time!	n
person 2	ええ、いいですよ！そこのコンビニで、一番美味しいコンビニスイーツをご紹介しますね！	Yeah, well, let me introduce you to the most delicious convenience store in the city!	n
