# Supplementary material
Source: ML conference proceedings conference paper supplement (https://aclanthology.org/2022.eval4nlp-1.9)
Supplement: SupplementaryMaterial [file 0069.xlsx]

## Sheet: Sheet1
person	source	translation	evaluation: is this a good translation?
person 1	いやあ、まいった、まいった！昨日も結局、仕事が徹夜だったよ。	Oh, my God, I've been working late last night.	n
person 2	お疲れ様。わたしも旅行代理店勤務がやっと板についてきたよ。	Thank you very much. I've finally got a travel shop here.	n
person 1	へえ、旅行代理店で働いてるなんて、素敵だね！旅行好きなの？	Oh, you love traveling shop, don't you?	n
person 2	旅行も好きだし、何より人を喜ばせるのが好きなんだ。あなたはどんなお仕事をしてるの？	I love traveling too, but what do you do for people?	n
person 1	わたしはIT関係の会社だよ。忙しいわりに、安月給だから、毎月月末はヒイヒイ言ってるよ。福耳なのに、金持ちとは無縁なんだ。	I'm a company of mine, so the moon is busy, so the moon is busy, and I don't listen very rich.	n
person 2	でも成長してる業界じゃないか。わたしは今マンションに住んでるけどいつかマイホームを建てたいと思ってるんだ。あなたはどう思う？	Do you think I'd like to live in a city where I grew up right now?	n
person 1	いいねー！いまも、ご家族と暮らしていらっしゃるの？	Hey, are you still living with your family?	n
person 2	そうなんだよ。子供も大きくなるし広い方がいいかなと思って。	Yeah, I think we should make a big difference with the kids.	n
person 1	なるほどね！一軒家なら、子どもが走り回っても気にしなくていいしね！	Well, if it's a house, don't worry about it!	n
person 2	そうなんだよね。あなたは今一人暮らしだっけ？	Yeah, you live alone now, right?	y
person 1	うん。コンビニの近くのアパートに住んでるんだけど、おかげで毎日コンビニスイーツを食べてて、体重がやばいよ。	Yeah, I live in a convenience store near the convenience store, but thanks to you, I can't lose weight every day.	n
person 2	あれハマると大変だよね！食べ過ぎ注意だよ！	You're too careful eating that shit!	n
