# Supplementary material
Source: ML conference proceedings conference paper supplement (https://aclanthology.org/2022.eval4nlp-1.9)
Supplement: SupplementaryMaterial [file 0069.xlsx]

## Sheet: Sheet1
person	source	translation	evaluation: is this a good translation?
person 1	いやあ、まいった、まいった！昨日も結局、仕事が徹夜だったよ。	Oh man, not again! Yesterday, I ended up working all night.	y
person 2	お疲れ様。わたしも旅行代理店勤務がやっと板についてきたよ。	You must be tired. I finally got used to working at a travel agency.	y
person 1	へえ、旅行代理店で働いてるなんて、素敵だね！旅行好きなの？	Oh, it must be nice working at a travel agency! Do you like to travelling?	n
person 2	旅行も好きだし、何より人を喜ばせるのが好きなんだ。あなたはどんなお仕事をしてるの？	Yeah, I like to travel. What I like best about this job is pleasing people. What kind of work do you do?	y
person 1	わたしはIT関係の会社だよ。忙しいわりに、安月給だから、毎月月末はヒイヒイ言ってるよ。福耳なのに、金持ちとは無縁なんだ。	I work at an IT company. But, despite being busy all the time, my monthly wages are low, so I'm always clutching at straws towards the end of the month. Even though I've got large earlobes, which are thought to be lucky, it seems that is unrelated to financial fortune.	n
person 2	でも成長してる業界じゃないか。わたしは今マンションに住んでるけどいつかマイホームを建てたいと思ってるんだ。あなたはどう思う？	But isn't IT a growing industry? I live in an apartment currently, but one day I'd like to build my own home. What do you think?	y
person 1	いいねー！いまも、ご家族と暮らしていらっしゃるの？	That would be nice! Are you still living with your family at the moment?	y
person 2	そうなんだよ。子供も大きくなるし広い方がいいかなと思って。	Yes, I do. But as my kids grow older, I think it would be better if they had more space.	n
person 1	なるほどね！一軒家なら、子どもが走り回っても気にしなくていいしね！	I see! And if you lived in a detached house, then you wouldn't need to worry about your kids running about and making a noise!	y
person 2	そうなんだよね。あなたは今一人暮らしだっけ？	Exactly. You live by yourself don't you?	n
person 1	うん。コンビニの近くのアパートに住んでるんだけど、おかげで毎日コンビニスイーツを食べてて、体重がやばいよ。	Yeah. I live in an apartment by a convenience store, which means I'm eating their sweets every day, and my weight has ballooned something crazy.	n
person 2	あれハマると大変だよね！食べ過ぎ注意だよ！	Yeah, it's a problem if you get hooked on those isn't it! Try not to eat so many!	y
