# Supplementary material
Source: ML conference proceedings conference paper supplement (https://aclanthology.org/2022.eval4nlp-1.9)
Supplement: SupplementaryMaterial [file 0070.xlsx]

## Sheet: Sheet1
person	source	translation	evaluation: is this a good translation?
person 1	ねえ、今日お客さんに歯並びがいいねって褒められちゃった。	Hey, I was honored to have your guests today.	n
person 2	すごーい！歯並びが良いと、笑顔が映えるよね！前に飼ってたハムちゃんみたいで、とってもキュートだよ。わたしの場合は、そうだなあ、えくぼがトレードマークかも。	Wow, that's amazing, because I've had a nice smile before, and I'm so cute.	n
person 1	あなたのえくぼ可愛いよね。わたしは歯並びが良くても口が大きからちょっと恥ずかしいな。	You know, maybe I'm a little ashamed of you, too, Mark.	n
person 2	いいじゃん！口が大きいのて美人の証拠って聞いたことあるよ。友達にもそう言われたことない？	Have you ever heard of a pretty little girl with big mouth and a big mouth?	n
person 1	えーないよ！でもちょっと自信持てそう。ありがとう！あなたは最近仕事どう？	Well, thank you very much, but you're a little confident, aren't you?	n
person 2	いまね、ブライダル関係の仕事に就いてるんだー！	Now you have a job to do with Bryant!	n
person 1	素敵な仕事ね！もし結婚されるカップルの方が新婚旅行先を迷ってるようだったらぜひわたしを紹介して！わたしこう見えて旅行代理店勤務だから！	Well, if you're getting married, you can introduce me to you, because if you're getting married, you're gonna have to meet me on a honeymoon.	n
person 2	そうだったんだ！わたしたちが組んだら、最高のチームになれそうね！	Yeah, well, we were best friends!	n
person 1	本当ね！わたしも人を喜ばせるのが好きだしね！	I really like to be happy with people, too!	n
person 2	へえ、わたしは人と話すのが好きで、今の仕事を選んだの。なんか、わたしたちって似てるわね？	Oh, I like to talk to people, but do you think we picked a job right now?	n
