# Supplementary material
Source: ML conference proceedings conference paper supplement (https://aclanthology.org/2022.eval4nlp-1.9)
Supplement: SupplementaryMaterial [file 0070.xlsx]

## Sheet: Sheet1
person	source	translation	evaluation: is this a good translation?
person 1	ねえ、今日お客さんに歯並びがいいねって褒められちゃった。	Hey, today, a customer told me I had a good, straight set of teeth.	y
person 2	すごーい！歯並びが良いと、笑顔が映えるよね！前に飼ってたハムちゃんみたいで、とってもキュートだよ。わたしの場合は、そうだなあ、えくぼがトレードマークかも。	Oh cool! If you have good tooth alignment, then your smile looks good, too! You look cute, just like the hamster I used to have as a pet. In my case, I guess it's my dimples that are my signature look.	n
person 1	あなたのえくぼ可愛いよね。わたしは歯並びが良くても口が大きからちょっと恥ずかしいな。	Ah yeah, your dimples are cute. But, even if I do have good teeth, I've got a big mouth, which I'm a little embarrassed about.	y
person 2	いいじゃん！口が大きいのて美人の証拠って聞いたことあるよ。友達にもそう言われたことない？	No, it's fine! I've heard that a large mouth is a sign of beauty. Haven't any of your friends ever told you that?	y
person 1	えーないよ！でもちょっと自信持てそう。ありがとう！あなたは最近仕事どう？	What, no! But I think I can be a bit proud of that. Thank you! Anyway, how's your work been lately?	y
person 2	いまね、ブライダル関係の仕事に就いてるんだー！	Right now, I'm employed at a bridal-related company!	y
person 1	素敵な仕事ね！もし結婚されるカップルの方が新婚旅行先を迷ってるようだったらぜひわたしを紹介して！わたしこう見えて旅行代理店勤務だから！	Oh, that's fancy! If a couple who are getting married are having trouble settling on a location for their honeymoon, please point them in my direction! I might not look like it, but I work for a travel agency!	n
person 2	そうだったんだ！わたしたちが組んだら、最高のチームになれそうね！	Oh right! If we got together, we'd make an amazing team!	y
person 1	本当ね！わたしも人を喜ばせるのが好きだしね！	I know right! I love to please people too!	y
person 2	へえ、わたしは人と話すのが好きで、今の仕事を選んだの。なんか、わたしたちって似てるわね？	Oh I see, well I chose this job because I like chatting to people. We're both pretty similar, aren't we?	n
