# Supplementary material
Source: ML conference proceedings conference paper supplement (https://aclanthology.org/2022.eval4nlp-1.9)
Supplement: SupplementaryMaterial [file 0071.xlsx]

## Sheet: Sheet1
person	source	translation	evaluation: is this a good translation?
person 1	あ、どうも！今日は天気予報で雨って言ってたから、洗濯物は外に干さないほうがイイですよ！	Well, thank you for the weather today, so the laundry needs to be washed out!	n
person 2	そうなんですね？なんだか虫歯が痛むのはそのせいかな？	Is it because of the pain of your throat?	n
person 1	えっ、虫歯があるんですか？大丈夫？	Uh, have you got a tooth?	n
person 2	そうなんです。でも歯医者が怖くて行かずにいたら悪化しちゃいました。	Yeah, but if the dentist hadn't been scared, he'd have gotten worse.	n
person 1	あら、それはまずいですよ。虫歯があると口臭がきつくなるでしょ？わたし、人と話すのは好きですけど、そういうのはちょっと。。。	Oh, that's not good, but I like talking to people, right?	n
person 2	え、虫歯って口臭にも関係あるんですか！？そんなこと言われるとすぐにでも治さないとって思いますね。あーでもやっぱり怖いなー。	You don't think that's gonna make you feel better?	n
person 1	頑張って！なにか、好きな音楽とかを聞いたら、勇気がわくんじゃないかしら？	If you're listening to the music, you're gonna love it!	n
person 2	好きな音楽とかは特にないんだけど、こんな時わたしの尊敬するナイチンゲールみたいなお医者さんだったら勇気が出るかも。あなたは音楽よく聴くの？	I don't like music, but when I hear this, you might as well listen to your courage as a doctor like this.	n
person 1	家で音楽を聞くと、昔飼ってたハムスターが嫌がったので、聞かなくなっちゃいました。オススメとかはあります？	So when I heard the music at home, I had a hamster who didn't want to hear it.	n
person 2	クラシックをよく聴いてたけど最近は全く。あなたは元気出したい時何するの？	What do you want to hear about classical music lately?	n
