# Supplementary material
Source: ML conference proceedings conference paper supplement (https://aclanthology.org/2022.eval4nlp-1.9)
Supplement: SupplementaryMaterial [file 0071.xlsx]

## Sheet: Sheet1
person	source	translation	evaluation: is this a good translation?
person 1	あ、どうも！今日は天気予報で雨って言ってたから、洗濯物は外に干さないほうがイイですよ！	Hey there! The weather forecast said it was going to rain today, so it's better if you don't hang you washing outside, you know!	n
person 2	そうなんですね？なんだか虫歯が痛むのはそのせいかな？	Oh, did it? I wonder if that's why my cavity hurts today.	y
person 1	えっ、虫歯があるんですか？大丈夫？	Huh, you have a cavity? Are you okay?	y
person 2	そうなんです。でも歯医者が怖くて行かずにいたら悪化しちゃいました。	Yes, I do, but I've been too afraid to go to the dentist, and now it's got worse.	y
person 1	あら、それはまずいですよ。虫歯があると口臭がきつくなるでしょ？わたし、人と話すのは好きですけど、そういうのはちょっと。。。	Oh, that's really bad. If you have a cavity, your breath smells worse as well, doesn't it? I love chatting with people, but, if they had bad breath...	y
person 2	え、虫歯って口臭にも関係あるんですか！？そんなこと言われるとすぐにでも治さないとって思いますね。あーでもやっぱり怖いなー。	What, tooth decay's related to bad breath? If you say that, then I think I need to go and get it sorted right away. Aah, but I am still afraid of going to the dentist.	y
person 1	頑張って！なにか、好きな音楽とかを聞いたら、勇気がわくんじゃないかしら？	Chin up! Couldn't you work up the courage by listening to your favourite music, or something?	y
person 2	好きな音楽とかは特にないんだけど、こんな時わたしの尊敬するナイチンゲールみたいなお医者さんだったら勇気が出るかも。あなたは音楽よく聴くの？	I don't particularly have favourite music, but if the dentist was like Florence Nightingale, whom I admire, then it might reassure me. Do you listen to music a lot?	y
person 1	家で音楽を聞くと、昔飼ってたハムスターが嫌がったので、聞かなくなっちゃいました。オススメとかはあります？	When I used to listen to music at home, but it upset my pet hamster, so I stopped listening. Do you have any song recommendations?	n
person 2	クラシックをよく聴いてたけど最近は全く。あなたは元気出したい時何するの？	I used to listen to classical music a lot, but I haven't listened to anything in ages. What do you do to put yourself in a better mood?	y
