# Supplementary material
Source: ML conference proceedings conference paper supplement (https://aclanthology.org/2022.eval4nlp-1.9)
Supplement: SupplementaryMaterial [file 0072.xlsx]

## Sheet: Sheet1
person	source	translation	evaluation: is this a good translation?
person 1	関係ないかもだけどさ、わたし医療関係で働いてるくせに虫歯できちゃった。最悪。	This might be unrelated but, even though I work in the medical field, I'm suffering from tooth decay. It sucks!	n
person 2	うわ！医者の不養生って言うんだっけ、そういうの。大丈夫なの？	Bleurgh! Don't they say, "physician, heal thyself" in this situation? Are you okay?	y
person 1	大丈夫ではないかな。わたし歯並びが悪いから磨き残しのせいでなったんだと思う。憂鬱だよ	No, I don't think I am. I think it's because my teeth are crooked and so there are places that I can't reach with the toothbrush. It's depressing.	y
person 2	それは凹むねー。はやく治したほうがいいよ！歯がきれいになったら、うちのお店に買い物においで！	Yeah, I can understand that would make you depressed. You should get it sorted as soon as possible! Once your teeth are all better, come shopping at my store!	y
person 1	なんのお店やってるの？	What kind of shop is it?	y
person 2	洋服屋さんで働いてるの！お洒落をすると、気分も一気に良くなるよ！	I work at a clothes shop! If you get dressed up, it will lift your spirits at once!	y
person 1	それいいね！頑張って治すよ！あーでもわたし歯医者が怖いんだよね。行くのやだなー	That sounds good! I'll do my best to get it sorted! Oh, but the thing is, I don't like going to the dentist. It scares me.	y
person 2	ファイトだよ、ファイト！わたしなんて、安ーい給料のせいで、社員寮から出られずにいるけど、歯を食いしばって生きてるんだから！	Come on, it'll be alright! I mean, look at me, I'm unable to get out of the company dormitory because my wages are so low, but I just grin and bear it!	y
person 1	そっかー。わたしは虫歯で歯を食いしばれないからせめて勇気を振り絞って行ってきます！	I see. Well, I can't grin and bear it because of my cavity, but I guess I'll just have to muster up all my courage and go for it!	y
person 2	おー！ファイトだー！わたしも、がんばって働いて、いつか憧れの庭付き一戸建てに引っ越すぞー！	Woo! Go for it! I'll also work hard towards my goal of one day owning my dream detached house with a garden!	y
