# Supplementary material
Source: ML conference proceedings conference paper supplement (https://aclanthology.org/2022.eval4nlp-1.9)
Supplement: SupplementaryMaterial [file 0072.xlsx]

## Sheet: Sheet1
person	source	translation	evaluation: is this a good translation?
person 1	関係ないかもだけどさ、わたし医療関係で働いてるくせに虫歯できちゃった。最悪。	Maybe it's none of my business, but I'm working on medical problems, and I've got teeth in my teeth.	n
person 2	うわ！医者の不養生って言うんだっけ、そういうの。大丈夫なの？	You're okay with that, right?	n
person 1	大丈夫ではないかな。わたし歯並びが悪いから磨き残しのせいでなったんだと思う。憂鬱だよ	I don't think it's gonna be all right, because I think I left my teeth in a bad mood.	n
person 2	それは凹むねー。はやく治したほうがいいよ！歯がきれいになったら、うちのお店に買い物においで！	Come on, let's go to the store and get some teeth fixed up quickly!	n
person 1	なんのお店やってるの？	What are you doing at the store?	n
person 2	洋服屋さんで働いてるの！お洒落をすると、気分も一気に良くなるよ！	I work in the dressing shop, and I feel good, you know?	n
person 1	それいいね！頑張って治すよ！あーでもわたし歯医者が怖いんだよね。行くのやだなー	Good luck with that, but I'm scared of being a dentist.	n
person 2	ファイトだよ、ファイト！わたしなんて、安ーい給料のせいで、社員寮から出られずにいるけど、歯を食いしばって生きてるんだから！	Fight, fight, fight, fight, fight, fight, fight, fight, fight, fight!	n
person 1	そっかー。わたしは虫歯で歯を食いしばれないからせめて勇気を振り絞って行ってきます！	I'm not going to eat my teeth at all!	n
person 2	おー！ファイトだー！わたしも、がんばって働いて、いつか憧れの庭付き一戸建てに引っ越すぞー！	- Fight, fight, fight, move, move, move, move, move!	n
