# Supplementary material
Source: ML conference proceedings conference paper supplement (https://aclanthology.org/2022.eval4nlp-1.9)
Supplement: SupplementaryMaterial [file 0073.xlsx]

## Sheet: Sheet1
person	source	translation	evaluation: is this a good translation?
person 1	ねえ、あなたってさ、理想の異性のタイプってある？	Hey, are you an idealist of ideals?	n
person 2	わたしは空港会社に勤務してるんだけど、やっぱりパイロットって憧れちゃう！あなたは？	I'm working at the airport, but you really want to be a pilot!	n
person 1	わたしはね、なんといっても、スティーブ・ジョブズ！あの人の見た目も生きざまも、どストライク！	I don't care what he looks like, Steve Joliet.	n
person 2	出た天才！あんな人世界中どこにもいないよ！見た目だけだったらいるかもしれないけど。	If he looks like such a genius, he could see anywhere in the world!	n
person 1	そんなことないよ！地球に何億の男がいると思ってるの？あと、10人や20人ぐらい居るって！	Do you think there's a million more men out there than 20 million other men in the world?	n
person 2	絶対そんなにいないってば！わたしの歳の離れた姉も似たようなこと言ってたけど結局普通の人と結婚したよ。	I told you I was never that old enough to marry my sister after all!	n
person 1	やーん、現実を直視させないでよー！わたしだって分かってるよ。いちアパレル店員が、あんな人との出会いなんて無いってこと。	- Don't look at me like that!	n
person 2	外国人とよく会うわたしでも会ったことないんだから諦めなって。他に好きなことないの？	You don't like people who don't want to see you anymore, do you?	n
person 1	チョット待って！あなたって、外国人との出会いがあるの？	Wait a minute. Do you have any other foreigners?	n
person 2	まあ、一応空港会社に勤めてるし。上司は外国人だし。あと外国人観光客にもよく会うってだけよ。	Well, my boss works in the airport, and he's just a foreigner, and he's just a foreigner, and he's a foreigner, and he's a foreigner, and he's a foreigner.	n
person 1	ずるーい！紹介して！そしたら、外人のダーリンとハーフの子どもに囲まれて、夢の庭付き一戸建てに住めるかも！	- And then he'll introduce me to the gringo and build a house around in Hertfordshire!	n
person 2	外人と一戸建ては関係ないでしょ。	It doesn't matter what happens with the gringo and Hero.	n
