# Supplementary material
Source: ML conference proceedings conference paper supplement (https://aclanthology.org/2022.eval4nlp-1.9)
Supplement: SupplementaryMaterial [file 0073.xlsx]

## Sheet: Sheet1
person	source	translation	evaluation: is this a good translation?
person 1	ねえ、あなたってさ、理想の異性のタイプってある？	Hey, what's your ideal type of person of the opposite sex?	y
person 2	わたしは空港会社に勤務してるんだけど、やっぱりパイロットって憧れちゃう！あなたは？	I work at an airport company, so as you might expect, I'm attracted to pilots! How about you?	y
person 1	わたしはね、なんといっても、スティーブ・ジョブズ！あの人の見た目も生きざまも、どストライク！	For me, it has to be Steve Jobs! His looks and his way of life are just my cup of tea!	y
person 2	出た天才！あんな人世界中どこにもいないよ！見た目だけだったらいるかもしれないけど。	You bring up the name of a genius, but there's no one else like him in the whole world! Well, maybe there is if you're just going on looks.	y
person 1	そんなことないよ！地球に何億の男がいると思ってるの？あと、10人や20人ぐらい居るって！	That's not true! Do you know how many billions of men there are on the planet? There must be around 10 or 20 more just like him!	y
person 2	絶対そんなにいないってば！わたしの歳の離れた姉も似たようなこと言ってたけど結局普通の人と結婚したよ。	Well, I say there definitely aren't that many! My much older sister used to say something similar, but ended up marrying a regular guy.	y
person 1	やーん、現実を直視させないでよー！わたしだって分かってるよ。いちアパレル店員が、あんな人との出会いなんて無いってこと。	Noo, there's no need to lay out the cold, hard facts like that! I'm already aware of the truth; there's no way a simple sales clerk at a clothing shop like me would ever meet a person like that.	y
person 2	外国人とよく会うわたしでも会ったことないんだから諦めなって。他に好きなことないの？	I've met a lot of people from other countries, but never anyone like Steve Jobs, so I think it's time to give up on that dream. Isn't there another kind of guy who's your type?	y
person 1	チョット待って！あなたって、外国人との出会いがあるの？	Hang on a minute! Are you saying that you meet people from other countries?	y
person 2	まあ、一応空港会社に勤めてるし。上司は外国人だし。あと外国人観光客にもよく会うってだけよ。	Well, I do work at an airport company. My manager is from overseas, and I often meet tourists from overseas as well.	y
person 1	ずるーい！紹介して！そしたら、外人のダーリンとハーフの子どもに囲まれて、夢の庭付き一戸建てに住めるかも！	Hey no fair! Introduce me to someone! Then one day I might be able to live in my dream detached house with a garden, surrounded by my loving foreign husband and biracial children!	y
person 2	外人と一戸建ては関係ないでしょ。	But, people from other countries and detached houses are completely unrelated.	y
