# Supplementary material
Source: ML conference proceedings conference paper supplement (https://aclanthology.org/2022.eval4nlp-1.9)
Supplement: SupplementaryMaterial [file 0074.xlsx]

## Sheet: Sheet1
person	source	translation	evaluation: is this a good translation?
person 1	ねえ、今日ランチ一緒に行かない？	Hey, do you want to go grab some lunch together today?	y
person 2	いいですけど、それって、デートのお誘いですか？	That sounds good but, what, are you inviting me on a date?	y
person 1	そういうわけじゃなかったんですけど。しかもわたしすごくお腹減ってるから生姜焼きなんでどうですかって言おうとしたぐらいですし。	No, that wasn't my intention. It's just I'm so hungry right now, so I simply wanted to suggest why don't we go get some pork fried with ginger.	y
person 2	いいですね！生姜焼きは、わたしも好きですよ。手作りだったら、なお最高です。ところで、あなたは独身ですか？	Sounds good! I like pork fried with ginger, too. It's especially good when it's homemade. By the way, are you single?	y
person 1	わたしも生姜焼き好きでよく作りますけどあなたには作りませんよ？独身ですけど、、さっきからなんか変じゃありません？	I like pork fried with ginger, and I often make it myself, but I won't share any with you. Well, I am single, but... you're acting a bit off right now, aren't you?	y
person 2	いや、これは失礼！こういうことするから、いくつになっても独身のままなんだな。	Oh gosh, I'm sorry! This is why I'll be single forever, because I do things like this.	y
person 1	そういうところだと思いますよ！わたしの尊敬する先輩とあなたが仲がいいからわたしも親しくさせてもらってるだけですから！	Yep, I think that's what it is! I simply thought I should get to know you better since you're friends with the senior colleague who I look up to!	y
person 2	う、これは厳しいな！わたしは肩幅が広いので、結構女性ウケが良いと思ってたんですけど、これからは大人しくしていようかな。	Oops, this is a tricky situation! I always thought I was popular with the ladies because of my broad shoulders, but I think I'll keep to myself a bit more from now on.	y
person 1	それをいうならわたしも姿勢いいですけど別にモテませんよ。	Well, if you put it like that, I have good posture, but that doesn't make me popular.	y
person 2	そうですか？とてもモテるように見えますよ！わたしの好きな雪景色のなかに佇んでたら、とっても絵になりそうです。	You surprise me, you seem pretty popular to me! If you were to stand in a snowy landscape, my favourite kind of scenery, it would look like a scene from a painting.	y
person 1	どうもありがとうございます、、	Er, thanks...	y
person 2	ああ、またやっちまったかな。申し訳なかった。気を取り直してランチに行きましょう！	Whoops, there I go again. I'm sorry. Let me get a grip on myself and let's go get that lunch!	y
