# Supplementary material
Source: ML conference proceedings conference paper supplement (https://aclanthology.org/2022.eval4nlp-1.9)
Supplement: SupplementaryMaterial [file 0074.xlsx]

## Sheet: Sheet1
person	source	translation	evaluation: is this a good translation?
person 1	ねえ、今日ランチ一緒に行かない？	Hey, you wanna come with me for lunch today?	y
person 2	いいですけど、それって、デートのお誘いですか？	Okay, but is that a date?	y
person 1	そういうわけじゃなかったんですけど。しかもわたしすごくお腹減ってるから生姜焼きなんでどうですかって言おうとしたぐらいですし。	I didn't mean that, but I was so hungry, Jiang.	n
person 2	いいですね！生姜焼きは、わたしも好きですよ。手作りだったら、なお最高です。ところで、あなたは独身ですか？	Well, I like to burn, too, so if it were a wedding, would you be single?	n
person 1	わたしも生姜焼き好きでよく作りますけどあなたには作りませんよ？独身ですけど、、さっきからなんか変じゃありません？	Jiang, I love to cook too, but you're not so single now, are you?	n
person 2	いや、これは失礼！こういうことするから、いくつになっても独身のままなんだな。	No, I'm sorry, but I'm not single.	n
person 1	そういうところだと思いますよ！わたしの尊敬する先輩とあなたが仲がいいからわたしも親しくさせてもらってるだけですから！	I think you and my esteemed carer, and I are just trying to get close to each other!	n
person 2	う、これは厳しいな！わたしは肩幅が広いので、結構女性ウケが良いと思ってたんですけど、これからは大人しくしていようかな。	Well, I thought this was a tough place for a woman, but now I think it's better to stay calm.	n
person 1	それをいうならわたしも姿勢いいですけど別にモテませんよ。	I don't care if it's a good idea.	n
person 2	そうですか？とてもモテるように見えますよ！わたしの好きな雪景色のなかに佇んでたら、とっても絵になりそうです。	If you look so much like me, you'll be very fond of me.	n
person 1	どうもありがとうございます、、	Thank you, sir.	y
person 2	ああ、またやっちまったかな。申し訳なかった。気を取り直してランチに行きましょう！	Oh, I'm sorry you got it again. Let's go back to lunch!	n
