# Supplementary material
Source: ML conference proceedings conference paper supplement (https://aclanthology.org/2022.eval4nlp-1.9)
Supplement: SupplementaryMaterial [file 0075.xlsx]

## Sheet: Sheet1
person	source	translation	evaluation: is this a good translation?
person 1	どうも、どうも。独身生活も長くなってくると、家でも買ったほうが嫁が来るんじゃないかと思い始めましたよ。	Thank you very much, but I think I should start buying my wife's house for the rest of my life.	n
person 2	どうですかね。わたしは大手電機メーカーに勤めてますがまだまだ独身者は多いですよ。習い事をされたら出会いが増えるのでは？	I don't know, but there are still a lot of people who still work for the big electrical maker, and if they find out what to do, they'll find out.	n
person 1	習い事ですか！あなたは、何か習ってるんですか？	What are you learning, huh?	n
person 2	習い事というか、ジムのプールに通っています。いい気分転換になりますよ。	I'll go to Jim's pool and change my mind.	n
person 1	なるほどー。わたしは雪が好きなので、ウィンタースポーツがしてみたいかな。	- Well, I like snow, so I like sports.	n
person 2	ウィンタースポーツもいいですね！でも冬しかできないからやっぱりわたしは水泳をオススメしますね。	Winterfell is a good sport, but I can only swim in the water for the winter!	n
person 1	確かにおっしゃるとおりです。同じ水泳でも寒中水泳は、寒い2月生まれのわたしもさすがに勘弁ですが！	As you can see, I'm cold and cold in the same ocean!	n
person 2	それはわたしも勘弁ですね！わたしプールの塩素の匂いを懐かしく感じるんですよね。小学校の時とか思い出しません？	Do you remember how I smelled when I was in school?	n
person 1	ああ、分かります！スクール水着も懐かしいですね！	Oh, I miss the swimming pool!	n
person 2	なんだか違う気もしますが、まあそういうことです。	I don't know, but it's not like that.	n
