# Supplementary material
Source: ML conference proceedings conference paper supplement (https://aclanthology.org/2022.eval4nlp-1.9)
Supplement: SupplementaryMaterial [file 0075.xlsx]

## Sheet: Sheet1
person	source	translation	evaluation: is this a good translation?
person 1	どうも、どうも。独身生活も長くなってくると、家でも買ったほうが嫁が来るんじゃないかと思い始めましたよ。	Hi. The longer I've been single, the more I've started to think that if I buy a house, it might attract a wife.	n
person 2	どうですかね。わたしは大手電機メーカーに勤めてますがまだまだ独身者は多いですよ。習い事をされたら出会いが増えるのでは？	Hmm, I wonder. I work for a major electrical manufacturer, and a lot of people working at the company are still single. If you took up lessons in something, wouldn't you meet more people that way?	n
person 1	習い事ですか！あなたは、何か習ってるんですか？	Lessons?! Are you learning something?	y
person 2	習い事というか、ジムのプールに通っています。いい気分転換になりますよ。	It's not a lesson per se, but I regularly use the pool at the gym. It's a good way to refresh yourself.	n
person 1	なるほどー。わたしは雪が好きなので、ウィンタースポーツがしてみたいかな。	I see, well I like the snow, so perhaps I'll take up winter sports.	y
person 2	ウィンタースポーツもいいですね！でも冬しかできないからやっぱりわたしは水泳をオススメしますね。	Yeah, winter sports sounds good, too! But you can only do that in the winter, so I'd have to recommend swimming after all.	n
person 1	確かにおっしゃるとおりです。同じ水泳でも寒中水泳は、寒い2月生まれのわたしもさすがに勘弁ですが！	I guess you're right. Even with swimming, doing it outside in the cold is something I'd like to be spared from, even though I was born in the cold month of February!	n
person 2	それはわたしも勘弁ですね！わたしプールの塩素の匂いを懐かしく感じるんですよね。小学校の時とか思い出しません？	Well yeah, I want to be spared from that too! The smell of chlorine at the swimming pool makes me feel nostalgic. Doesn't it remind you of being in primary school?	y
person 1	ああ、分かります！スクール水着も懐かしいですね！	Oh yeah, I know what you mean! I remember the regulation swimsuits as well!	n
person 2	なんだか違う気もしますが、まあそういうことです。	I think that's a little different, but yeah, that sort of thing.	y
