# Supplementary material
Source: ML conference proceedings conference paper supplement (https://aclanthology.org/2022.eval4nlp-1.9)
Supplement: SupplementaryMaterial [file 0076.xlsx]

## Sheet: Sheet1
person	source	translation	evaluation: is this a good translation?
person 1	はあ。わたしなで肩がコンプレックスでさ。あなたはある？コンプレックスとか。	Do I have a big shoulders in the system?	n
person 2	そうだなあ、コンプレックスとまでは言わないけど、子供っぽい顔があんまり好きじゃないよ。	Look, I'm not saying I don't like being a kid, but I don't like being a kid.	n
person 1	歳を取らないってことだしむしろ羨ましいけどな！	I'm lucky you don't get older!	n
person 2	そうかなあ。でも、化粧品メーカーで、こんなわたしでも大人っぽく見えるメイク用品を開発してるの！	Look, I'm a figment, but I'm developing this stupid piece of makeup!	n
person 1	それは素敵ね！同じ悩みを持ってる人もいるでしょうし！わたしは尊敬する松下幸之助に憧れて大手電機メーカーに勤めてるのよ。	I know that you have the same problem, too, and I respect you, but I respect your skills!	n
person 2	へえ、憧れてる人と同じ業界にいくって、よっぽどだよ。なにか電化製品は開発した？	Oh, it's like being in the same company as the people you love.	n
person 1	わたしは開発じゃなくて営業なの。あなたはストレス溜まることってない？	I mean, I'm not a development, are you?	n
person 2	ストレスはあんまりないよ。ただ、猫背がちょっと気になるかも。	I'm not a bit stressed, but maybe I'm just a little taller.	n
person 1	猫背は直そうと思えば直せるから大丈夫だよ。わたしのなで肩は直しようがないからさ。	If I try to fix it back, I'll be fine because I can't fix it.	n
person 2	なで肩って、しとやかっぽくて良いと思うよ。着物が似合いそう。	I think my shoulders are getting better and better and better.	n
