# Supplementary material
Source: ML conference proceedings conference paper supplement (https://aclanthology.org/2022.eval4nlp-1.9)
Supplement: SupplementaryMaterial [file 0076.xlsx]

## Sheet: Sheet1
person	source	translation	evaluation: is this a good translation?
person 1	はあ。わたしなで肩がコンプレックスでさ。あなたはある？コンプレックスとか。	Sigh, I have a bit of a complex about my sloping shoulders. Do you have any? Complexes, that is.	y
person 2	そうだなあ、コンプレックスとまでは言わないけど、子供っぽい顔があんまり好きじゃないよ。	Well, I don't really like that I'm baby-faced, but I wouldn't really call it a complex.	y
person 1	歳を取らないってことだしむしろ羨ましいけどな！	If anything, I'm jealous of that, it means you never appear to age!	y
person 2	そうかなあ。でも、化粧品メーカーで、こんなわたしでも大人っぽく見えるメイク用品を開発してるの！	I guess. But, at the cosmetics company where I work, I'm working on developing a range of makeup products that make person like me look more grown up!	y
person 1	それは素敵ね！同じ悩みを持ってる人もいるでしょうし！わたしは尊敬する松下幸之助に憧れて大手電機メーカーに勤めてるのよ。	That's great! I bet there are other people who share the same concern! I work for a major electrical manufacturer, because I was inspired by Konosuke Matsushita, whom I respect.	y
person 2	へえ、憧れてる人と同じ業界にいくって、よっぽどだよ。なにか電化製品は開発した？	Wow, you must admire him very much to want to enter the same industry. Have you developed any electrical appliances?	y
person 1	わたしは開発じゃなくて営業なの。あなたはストレス溜まることってない？	No, I'm not in development, I'm in sales. Do you ever get stressed out?	y
person 2	ストレスはあんまりないよ。ただ、猫背がちょっと気になるかも。	I don't really get stressed, although I am a little bothered by my bent back.	y
person 1	猫背は直そうと思えば直せるから大丈夫だよ。わたしのなで肩は直しようがないからさ。	You can sort out a bent back if you wanted to, so it's alright for you. There's nothing I can do about my sloping shoulders.	y
person 2	なで肩って、しとやかっぽくて良いと思うよ。着物が似合いそう。	I think sloping shoulders are good because they look graceful. I expect you look good in a kimono.	y
