# Supplementary material
Source: ML conference proceedings conference paper supplement (https://aclanthology.org/2022.eval4nlp-1.9)
Supplement: SupplementaryMaterial [file 0077.xlsx]

## Sheet: Sheet1
person	source	translation	evaluation: is this a good translation?
person 1	今日はいい天気ですねー！こういう日にお布団を干すと、幸せになれますよ！	It's a nice day for the weather, and it'll be a happy day!	n
person 2	それってすごく素敵な発想ですね！じゃあわたしも今日はお布団を干そうかな！	Well, that's a very nice idea. Shall I rest my ass?	n
person 1	ええ、ぜひぜひ。お布団を取り込んだ後、顔をうずめると、なんとも言えない懐かしい香りがするんですよ。	Yeah, I can't tell you how much it smells after I rip your face off.	n
person 2	確かに！お日様の香りって感じでわたしも好きです。私たち夫婦には子供がいないのでママ友とかいないんですよね。あなたとこういう話ができて嬉しいです。	Well, I'm glad you don't like to talk to your mom like this, because we don't even have a wife.	n
person 1	わたしも嬉しいです。あ、でも、干す時には日焼けに気をつけてね！	Well, I'm glad to hear it too, but watch out for sunburn!	n
person 2	わたしはあまり日焼けには頓着してませんがあなたはきちんとケアしてらっしゃるんですか？	I'm not wearing too much suntan, are you?	n
person 1	ええ、一応、化粧品メーカーに勤めてるんで。もしよかったら、サンプルを差し上げますよ？有名なメーカーだから安心して！	Yeah, well, if you give me a sample of the sculptor, I'd be happy to give it to the famous maker!	n
person 2	それはありがたいですね。新聞社勤めをしていると身なりに気を使わなくなってしまって。	I'm glad you're working for the newspaper.	n
person 1	あら、新聞記者さんだったの？ビックリ！	Oh, my God, was it a reporter?	n
person 2	実はそうなんです。いろんなネタを書くので地獄耳だって人からよく言われるんですよね。	Well, actually, it was a lot of people who say a lot about stories.	n
