# Supplementary material
Source: ML conference proceedings conference paper supplement (https://aclanthology.org/2022.eval4nlp-1.9)
Supplement: SupplementaryMaterial [file 0077.xlsx]

## Sheet: Sheet1
person	source	translation	evaluation: is this a good translation?
person 1	今日はいい天気ですねー！こういう日にお布団を干すと、幸せになれますよ！	It's a nice day today! If you hang your futon out on a fine day like this, it will bring you happiness!	y
person 2	それってすごく素敵な発想ですね！じゃあわたしも今日はお布団を干そうかな！	That's a really nice thought! In that case, perhaps I'll hang my futon out today too!	y
person 1	ええ、ぜひぜひ。お布団を取り込んだ後、顔をうずめると、なんとも言えない懐かしい香りがするんですよ。	Yes, please do. When you bring it back in, if you bury your face into it, it has an indescribably nostalgic smell.	y
person 2	確かに！お日様の香りって感じでわたしも好きです。私たち夫婦には子供がいないのでママ友とかいないんですよね。あなたとこういう話ができて嬉しいです。	That's true! I like that kind of sun-kissed smell, too. We don't have any children, so I don't have any friends who are mums, but I'm glad that I'm able to chat like this with you.	y
person 1	わたしも嬉しいです。あ、でも、干す時には日焼けに気をつけてね！	I'm glad, too. Oh, but also, make sure you don't get sunburnt when you hang the futon.	y
person 2	わたしはあまり日焼けには頓着してませんがあなたはきちんとケアしてらっしゃるんですか？	I'm not overly concerned about getting a bit of sun on me, but do you take proper care of yourself?	y
person 1	ええ、一応、化粧品メーカーに勤めてるんで。もしよかったら、サンプルを差し上げますよ？有名なメーカーだから安心して！	Yes, because I work at a cosmetics manufacturer for now. I can give you some samples, if you'd like. Don't worry, it's a big brand!	y
person 2	それはありがたいですね。新聞社勤めをしていると身なりに気を使わなくなってしまって。	I'd be very grateful. Working at a newspaper company, I've kind of given up on attending to my appearance.	y
person 1	あら、新聞記者さんだったの？ビックリ！	Oh, you're a newspaper journalist? That's a surprise!	y
person 2	実はそうなんです。いろんなネタを書くので地獄耳だって人からよく言われるんですよね。	I am, actually. People often say I must get wind of all the juicy gossip before anyone else because of all the articles I write.	y
