# Supplementary material
Source: ML conference proceedings conference paper supplement (https://aclanthology.org/2022.eval4nlp-1.9)
Supplement: SupplementaryMaterial [file 0078.xlsx]

## Sheet: Sheet1
person	source	translation	evaluation: is this a good translation?
person 1	初めまして。わたし新聞社に勤めるているものなんですが、いくつかお聞きしてもいいですか？	Nice to meet you. I work at a newspaper company, may I ask you a few questions?	y
person 2	はい！いいですよ。なんでしょう？	Yeah, sure! What's up?	y
person 1	ありがとうございます。では、DINKsってご存知ですか？	Thank you very much. First of all, do you know what "DINK" means?	y
person 2	ああ、あれですよね、子どもを持たない主義の夫婦！	Oh yeah, it's, you know, a married couple who have chosen not to have kids!	y
person 1	よくご存知ですね！そうです。共働きで子供を持つつもりのない夫婦のことなんですけど、これについての記事を書こうと思っていまして。実はわたしもそのDINKsなんですよね。	You know your stuff! That's right. It refers to a married couple who both work and don't intend to have children, and I'm thinking of writing an article about this topic. And actually, I am also a DINK myself.	y
person 2	そうなんですか！わたしは独身貴族なので、何かをいう権利はないと思いますが、既婚子持ちの妹からすると、ありえない！と怒られそうです。	You are? Well, I'm a well-off bachelor, so I don't think I have the right to talk on the subject, but my little sister, who is married with children, would probably get angry and say, "no way!"	y
person 1	そういう意見も取り入れたいと思ってるので遠慮なく言ってください。わたしの話になるんですが、実はわたし離婚歴もあって。仕事に生きようと思っていたら今の夫に出会ったんです。	I'd like to include those sorts of opinions too, so don't hold back. Talking from my own experience, I've actually been divorced before, and just when I had made up my mind to pour my life into my work, that's when I met my current husband.	n
person 2	おや、素敵な話じゃないですか。でも、子どもは持たないのは、理由があるんですか？	Aah, that's a nice story. But, is there a reason why you don't want to have children?	y
person 1	どうしても出産するにあたって仕事を休まないといけなくなるじゃないですか？それがいやで。子供は嫌いじゃないんですけどね。	Well, you have to take time off from work to give birth no matter what, right? I don't like the idea of that. I don't hate children though.	y
person 2	ああ、それは男のわたしでも分かりますよ。わたしも忙しくて不規則な勤務で有名なテレビ業界で、長く働いてますから。	Ah yeah, even though I'm a man, I get where you're coming from. I've worked a long time in the TV industry, which is notorious for having a very hectic and irregular work schedule.	y
