# Supplementary material
Source: ML conference proceedings conference paper supplement (https://aclanthology.org/2022.eval4nlp-1.9)
Supplement: SupplementaryMaterial [file 0078.xlsx]

## Sheet: Sheet1
person	source	translation	evaluation: is this a good translation?
person 1	初めまして。わたし新聞社に勤めるているものなんですが、いくつかお聞きしてもいいですか？	It's nice to meet you, but can I ask you something?	n
person 2	はい！いいですよ。なんでしょう？	Yes, sir.	n
person 1	ありがとうございます。では、DINKsってご存知ですか？	Thank you, DCR?	n
person 2	ああ、あれですよね、子どもを持たない主義の夫婦！	Oh, there's no children!	n
person 1	よくご存知ですね！そうです。共働きで子供を持つつもりのない夫婦のことなんですけど、これについての記事を書こうと思っていまして。実はわたしもそのDINKsなんですよね。	You know, I'm trying to write this article about our marriage and not having kids working on it!	n
person 2	そうなんですか！わたしは独身貴族なので、何かをいう権利はないと思いますが、既婚子持ちの妹からすると、ありえない！と怒られそうです。	I don't think that's true, because my sister's married, too!	n
person 1	そういう意見も取り入れたいと思ってるので遠慮なく言ってください。わたしの話になるんですが、実はわたし離婚歴もあって。仕事に生きようと思っていたら今の夫に出会ったんです。	Well, if you'd like to see my husband now, if you'd like to talk to him, then I'd be happy to my husband right now.	n
person 2	おや、素敵な話じゃないですか。でも、子どもは持たないのは、理由があるんですか？	Well, that's a nice story, but there's no children here, is there?	n
person 1	どうしても出産するにあたって仕事を休まないといけなくなるじゃないですか？それがいやで。子供は嫌いじゃないんですけどね。	You know, I have to get some rest, but I don't like kids.	n
person 2	ああ、それは男のわたしでも分かりますよ。わたしも忙しくて不規則な勤務で有名なテレビ業界で、長く働いてますから。	Yeah, well, I know it's been a long time since I've been on television, but I'm a very famous guy.	n
