# Supplementary material
Source: ML conference proceedings conference paper supplement (https://aclanthology.org/2022.eval4nlp-1.9)
Supplement: SupplementaryMaterial [file 0079.xlsx]

## Sheet: Sheet1
person	source	translation	evaluation: is this a good translation?
person 1	あのね、聞いて！ずーっと夢だったテレビ業界に潜り込むことに成功したんだ！	Hey, listen to this, right! I've always dreamed of working in the TV industry, and I finally managed to sneak my way in!	y
person 2	潜り込むって。でもよかったじゃない！おめでとう！実はわたしも夢が叶ったの！	Sneak your way in? Whatever, that's great! Congratulations! Actually, my dream came true, too!	y
person 1	え、なになに？どんな夢？	Oooh, what dream?	n
person 2	わたし昔からアニメオタクだったけどそれを仕事にできるんだ！ゲーム制作会社に就職が決まったんだ！	I've always been into anime, and now I can make that into my job! I got a job at a game developer!	y
person 1	わお、すごいじゃん！努力したんだろうね！	Wow, that's awesome! You must have put a lot of effort in!	y
person 2	好きだから努力っていう風には思わないけどでも頑張ったかな。あなたも家族の方喜んだでしょう？	It didn't feel like effort, because it's something I love, but I think I tried my best. Were your family happy for you too?	y
person 1	うん、妹から就職祝いにスーツもらっちゃった。うちの妹はアニメ好きだから、なんだか、あなたにシンパシーを感じるわ！	Yeah, my sister gave me a suit to celebrate me getting a job. She's into anime too, so I somehow feel a connection with you!	y
person 2	いい妹さんだね！わたしも一人っ子だから両親が大喜びでさ。	That was nice of your sister! I'm an only child, so my parents are overjoyed.	y
person 1	そりゃ、そうでしょう！就職の次に、ご両親が喜ぶことと言ったら、結婚して孫の顔を見せることかな？	Well, I expect they would be! Now you've got a job the next thing that would please your parents would be to get married and give them a grandchild, I guess.	y
person 2	うーんそれはもう少し先になりそうだな。あなたは？	Hmmm, I think that's some way off yet. What about you?	y
person 1	わたしなんて、永遠に現実にはならないかも。浅黒い肌じゃ、嫁にもらってもらえなくて、多分ずっと独身貴族だからねー！	I think that may never become reality for me. I've got a very dark complexion, so I doubt anyone would agree to marry me, and I'll remain a well-off bachelor forever!	y
person 2	そんなことないよ。そういうの好きな人もいると思うけどな。	I don't think that's true. You're bound to be somebody's type.	y
