# Supplementary material
Source: ML conference proceedings conference paper supplement (https://aclanthology.org/2022.eval4nlp-1.9)
Supplement: SupplementaryMaterial [file 0079.xlsx]

## Sheet: Sheet1
person	source	translation	evaluation: is this a good translation?
person 1	あのね、聞いて！ずーっと夢だったテレビ業界に潜り込むことに成功したんだ！	Listen, I've been having a dream, and I've been into the TV business all my life!	n
person 2	潜り込むって。でもよかったじゃない！おめでとう！実はわたしも夢が叶ったの！	I'm glad you're hiding, but I'm really happy to have a dream, too!	n
person 1	え、なになに？どんな夢？	What dream?	n
person 2	わたし昔からアニメオタクだったけどそれを仕事にできるんだ！ゲーム制作会社に就職が決まったんだ！	I used to be a cartoonist, but my job was to work on the game!	n
person 1	わお、すごいじゃん！努力したんだろうね！	You did great!	n
person 2	好きだから努力っていう風には思わないけどでも頑張ったかな。あなたも家族の方喜んだでしょう？	I don't think I like to try, but are you happy with your family?	n
person 1	うん、妹から就職祝いにスーツもらっちゃった。うちの妹はアニメ好きだから、なんだか、あなたにシンパシーを感じるわ！	Yeah, I like my sister, Angie, she gave me a job, and I like you!	n
person 2	いい妹さんだね！わたしも一人っ子だから両親が大喜びでさ。	I'm your sister, too. My parents are very happy.	n
person 1	そりゃ、そうでしょう！就職の次に、ご両親が喜ぶことと言ったら、結婚して孫の顔を見せることかな？	Well, if my parents say that they'll be happy to see their grandparents after work, will they?	n
person 2	うーんそれはもう少し先になりそうだな。あなたは？	Well, it's gonna be a little longer, isn't it?	n
person 1	わたしなんて、永遠に現実にはならないかも。浅黒い肌じゃ、嫁にもらってもらえなくて、多分ずっと独身貴族だからねー！	I may not be real forever, because I'm probably never married to a black woman!	n
person 2	そんなことないよ。そういうの好きな人もいると思うけどな。	I don't think that's true.	n
