# Supplementary material
Source: ML conference proceedings conference paper supplement (https://aclanthology.org/2022.eval4nlp-1.9)
Supplement: SupplementaryMaterial [file 0080.xlsx]

## Sheet: Sheet1
person	source	translation	evaluation: is this a good translation?
person 1	あなたって高校のとき何か部に所属してた？	Were you part of something in high school?	n
person 2	ううん。帰宅部だったよ。あなたは？	No, you were home from the office.	n
person 1	わたしは漫研に入ってたんだ。あなたは漫画とか読む？	I was in the gulf, and you read comic books?	n
person 2	漫画は、新聞についてる4コマ漫画が好き！新聞配達員をしてるから、毎日読み放題！	The comic books are reading four comic books every day from every newspaper in the day!	n
person 1	それはいいね。４コマ漫画の面白さを知ってるあなたは上級者だよ。わたし実は先日、ゲーム制作会社に就職が決まったんだ。ゲームはやる？	That's good. You know, I know four comic books about comic books last night, actually, and I got a job for a jock game.	n
person 2	あー、ゲームはあんまりやらないかな。早寝早起きがモットーだから、夜ご飯食べたら、すぐに寝ちゃうし。	Well, maybe it's not too early for games to go to sleep, so I'll get some sleep soon, and then I'll get some sleep.	n
person 1	規則正しい生活をしてるんだね。わたしは早寝早起きのやり方なんて忘れちゃったよ。高校の時といえば、放課後よく石焼き芋を売る屋台が通ってたんだよね。	You know, when I get down to school, I forget how I ended up selling the stones after school early.	n
person 2	あー、石焼い芋って美味しいよねー！その屋台で、よく買ってたの？	Oh, it's delicious!	n
person 1	そうなんだよ。大好きでさ。今でもあの石焼き芋の歌を聞くと懐かしく感じるんだよね。あなたにはそういうのない？	Yes, I love that rock song, but it still feels like you're still in love with that rock, don't you?	n
person 2	あるある！学生時代は海の近くの街に住んでて、通学の時に海沿いの道を自転車で通ってたから、今でも海の匂いを嗅ぐと、当時が蘇るよ！	I can smell that bike from the ocean near the ocean when I'm living near the ocean!	n
