# Supplementary material
Source: ML conference proceedings conference paper supplement (https://aclanthology.org/2022.eval4nlp-1.9)
Supplement: SupplementaryMaterial [file 0080.xlsx]

## Sheet: Sheet1
person	source	translation	evaluation: is this a good translation?
person 1	あなたって高校のとき何か部に所属してた？	Were you in any clubs when you were at high school?	y
person 2	ううん。帰宅部だったよ。あなたは？	No. I was in the "go home" club. What about you?	y
person 1	わたしは漫研に入ってたんだ。あなたは漫画とか読む？	I was in the manga club. Do you read mangas or anything?	y
person 2	漫画は、新聞についてる4コマ漫画が好き！新聞配達員をしてるから、毎日読み放題！	Manga? I like the 4-panel comics in the newspaper! I'm a newspaper carrier, so I can read as much as I want every day!	y
person 1	それはいいね。４コマ漫画の面白さを知ってるあなたは上級者だよ。わたし実は先日、ゲーム制作会社に就職が決まったんだ。ゲームはやる？	That's cool. You have excellent taste if you appreciate what's so good about 4-panel comics. I actually got a job with a game developer the other day. Do you play games?	y
person 2	あー、ゲームはあんまりやらないかな。早寝早起きがモットーだから、夜ご飯食べたら、すぐに寝ちゃうし。	Ah, I don't play games very much. My motto is "early to bed, early to rise", so in the evening I go to bed shortly after eating dinner.	y
person 1	規則正しい生活をしてるんだね。わたしは早寝早起きのやり方なんて忘れちゃったよ。高校の時といえば、放課後よく石焼き芋を売る屋台が通ってたんだよね。	Sounds like you lead a well-ordered life. I've forgotten how to keep early hours. Speaking of high school, at the end of the day, a food stand that sold stone-roasted sweet potatoes often passed by.	n
person 2	あー、石焼い芋って美味しいよねー！その屋台で、よく買ってたの？	Ah, stone-roasted sweet potatoes are amazing, aren't they? Did you buy them often from that stand?	y
person 1	そうなんだよ。大好きでさ。今でもあの石焼き芋の歌を聞くと懐かしく感じるんだよね。あなたにはそういうのない？	Yes, I did, because I love them. Even now I get all nostalgic when I hear the song of the stone-roasted sweet potato seller. Do you have anything like that?	y
person 2	あるある！学生時代は海の近くの街に住んでて、通学の時に海沿いの道を自転車で通ってたから、今でも海の匂いを嗅ぐと、当時が蘇るよ！	Yes I do! I lived in a seaside town when I was at school, and I used to cycle along the road by the sea on the way to school, so, even now, when I smell the sea air, I recall those times!	y
