# Supplementary material
Source: ML conference proceedings conference paper supplement (https://aclanthology.org/2022.eval4nlp-1.9)
Supplement: SupplementaryMaterial [file 0081.xlsx]

## Sheet: Sheet1
person	source	translation	evaluation: is this a good translation?
person 1	はじめまして。私は新聞配達をしています。	Hi, nice to meet you. I'm a newspaper carrier.	y
person 2	そうなんですね！実は私は郵便局に勤めていて…気が合いますね！	Oh really? I actually work at the post office,so it seems we have something in common!	y
person 1	似た業種ですね。きっとあなたも同じだと思うのですが、早寝早起きがモットーです。	Yeah, it's a similar line of work. I'm sure you must be the same then, but my motto is "early to bed, early to rise".	y
person 2	わたしも朝早起きしますよ、そのため年上のおばあちゃんに好かれてまして…	I get up early too, and for that reason, there's an old lady who likes me...	y
person 1	確かに、お年寄りも早起きといいますもんね。同じくらいの時間に起きるんですか？	Well, they do say that elderly people also wake up early, don't they. Do you wake up around the same time?	y
person 2	そうなんですよ、そしてそこら辺をぶらりと散歩するもんで。あなたはいかがですか？	Yes, and then we go for a stroll around the block. How about you?	y
person 1	おばあちゃん、喜んでもらえていますね。私も散歩は好きですよ。	You must be making that old lady happy. I like walking, too.	y
person 2	同じですね！でも私は高所恐怖症だからあまり高いところには行けないです。	We're the same! Although, I'm afraid of heights, so I don't go anywhere too high up.	y
person 1	そうなんですね。高所恐怖症は、辛いですね。配達の時にバイクなどで高いところ通ったりするんですか？	Oh okay. It must be difficult being scared of heights. Do you have to travel through high up places on a bike or whatever when you're out delivering?	y
person 2	しますします、でも蛇年の私は今年高いところがラッキーな場所らしいので挑戦しようと思います。	Yes, but this year, high up places are supposed to be lucky for people born in the year of the snake like me, so I think I'll challenge myself to overcome my fear.	y
person 1	なるほど。チャレンジですね！私は海辺で生まれ育ったので、最近懐かしくて。今年は海に行って、潮の香を楽しみたいです。	I see. That's a good challenge to take on! I grew up by the sea, so I've been missing it lately. This year, I'd like to go to the sea and take in the sea air.	y
person 2	それはいいことだ、お互いお仕事頑張りましょうね！	That sounds good, let's both work hard to achieve our goals then!	y
