# Supplementary material
Source: ML conference proceedings conference paper supplement (https://aclanthology.org/2022.eval4nlp-1.9)
Supplement: SupplementaryMaterial [file 0081.xlsx]

## Sheet: Sheet1
person	source	translation	evaluation: is this a good translation?
person 1	はじめまして。私は新聞配達をしています。	Nice to meet you. I'm delivering a newspaper.	n
person 2	そうなんですね！実は私は郵便局に勤めていて…気が合いますね！	Well, actually, I'm working for the mail office!	y
person 1	似た業種ですね。きっとあなたも同じだと思うのですが、早寝早起きがモットーです。	You must think you're the same type as the others, but soon you'll be asleep.	n
person 2	わたしも朝早起きしますよ、そのため年上のおばあちゃんに好かれてまして…	I wake up early in the morning, too, so my old grandmother likes me.	y
person 1	確かに、お年寄りも早起きといいますもんね。同じくらいの時間に起きるんですか？	Are you sure you want to wake up early and wake up at the same time?	y
person 2	そうなんですよ、そしてそこら辺をぶらりと散歩するもんで。あなたはいかがですか？	Yes, and how about you take a walk around all the time?	n
person 1	おばあちゃん、喜んでもらえていますね。私も散歩は好きですよ。	I like walking too, Grandma.	y
person 2	同じですね！でも私は高所恐怖症だからあまり高いところには行けないです。	It's the same, but I can't go much higher.	n
person 1	そうなんですね。高所恐怖症は、辛いですね。配達の時にバイクなどで高いところ通ったりするんですか？	Yeah, it's hard to ride a bike when a delivery trip is expensive?	n
person 2	しますします、でも蛇年の私は今年高いところがラッキーな場所らしいので挑戦しようと思います。	But I think the snake's lucky this year, so I'm going to have to challenge it.	n
person 1	なるほど。チャレンジですね！私は海辺で生まれ育ったので、最近懐かしくて。今年は海に行って、潮の香を楽しみたいです。	Well, I've grown up in the ocean lately because I've been growing up in the ocean for the last year!	y
person 2	それはいいことだ、お互いお仕事頑張りましょうね！	That's good work, both of us!	n
