# Supplementary material
Source: ML conference proceedings conference paper supplement (https://aclanthology.org/2022.eval4nlp-1.9)
Supplement: SupplementaryMaterial [file 0082.xlsx]

## Sheet: Sheet1
person	source	translation	evaluation: is this a good translation?
person 1	こんにちは、最近困っていることがあるんです、聞いてくれませんか？	Hello, I've been having a lot of trouble lately. Can I ask you something?	y
person 2	そうなんですね。どうしたんですか？	Yeah, what's up?	y
person 1	私はセロリが大嫌いなんだ、でも蛇年の私はセロリがラッキーフードなんだ。	I hate cyril, but I've been a rooster for years.	n
person 2	なんてことでしょう！でもラッキーを手に入れるためには、その苦手な物を克服しないとですね。	Oh, my God. But we have to overcome something that's not good enough.	y
person 1	そうなんですよ…あなたは苦手なものがありますか？	Yes, you do. You don't like it?	y
person 2	私は虫が苦手なんです。でも、キャンプに興味があるので、がんばって虫を克服しようかと思っています。	I'm not very interested in bugs, but I think I'm trying to overcome the bugs.	y
person 1	なるほど、高所恐怖症の私にはとても危険で無理そうなことだなぁ。	Well, that's very dangerous for me to be in high risk.	n
person 2	大丈夫ですよ。平地でも、キャンプできるところはありますので。	It's all right. There's a camp in the ground.	n
person 1	そうなんですか！今度ぜひ教えてほしいです！	I'd like you to tell me again!	y
person 2	はいぜひ、一緒にキャンプでも行きましょうか。私は普段電車通勤なんで、どうしても体を動かしたいんですよ。	Yes, I'd like to go to camp with you, but I have to move my body.	n
