# Supplementary material
Source: ML conference proceedings conference paper supplement (https://aclanthology.org/2022.eval4nlp-1.9)
Supplement: SupplementaryMaterial [file 0082.xlsx]

## Sheet: Sheet1
person	source	translation	evaluation: is this a good translation?
person 1	こんにちは、最近困っていることがあるんです、聞いてくれませんか？	Hi, I've been a bit of a pickle recently, do you mind if I tell you about it?	y
person 2	そうなんですね。どうしたんですか？	Yeah, go ahead, what's wrong?	y
person 1	私はセロリが大嫌いなんだ、でも蛇年の私はセロリがラッキーフードなんだ。	I hate celery, but I was born in the year of the snake, and celery is supposed to be a lucky food for me.	n
person 2	なんてことでしょう！でもラッキーを手に入れるためには、その苦手な物を克服しないとですね。	My word! But in order to acquire that luck, you must first overcome the thing that you dislike.	y
person 1	そうなんですよ…あなたは苦手なものがありますか？	I guess you're right...Is there anything that you dislike?	y
person 2	私は虫が苦手なんです。でも、キャンプに興味があるので、がんばって虫を克服しようかと思っています。	I dislike bugs and creepy-crawlies. But, I really wanna go camping, so I want to try my best to get over my dislike of them.	y
person 1	なるほど、高所恐怖症の私にはとても危険で無理そうなことだなぁ。	I see, for me camping is something totally dangerous that I could never possibly do as I am afraid of heights.	y
person 2	大丈夫ですよ。平地でも、キャンプできるところはありますので。	Oh, don't worry. There are places where you can camp on flat ground as well.	y
person 1	そうなんですか！今度ぜひ教えてほしいです！	Oh really? I'd love it if you could tell me where sometime!	y
person 2	はいぜひ、一緒にキャンプでも行きましょうか。私は普段電車通勤なんで、どうしても体を動かしたいんですよ。	Sure thing, why don't we go camping together? I usually commute by train, so I want to get out and move about.	y
