# Supplementary material
Source: ML conference proceedings conference paper supplement (https://aclanthology.org/2022.eval4nlp-1.9)
Supplement: SupplementaryMaterial [file 0083.xlsx]

## Sheet: Sheet1
person	source	translation	evaluation: is this a good translation?
person 1	こんにちは！わたし、経理の仕事をしているので、数字に強いんですよー。あなたは何か得意なこと、あります？	Hi! I work as an accountant, so I'm good with numbers. Is there anything like that that you are good at?	y
person 2	わたしは運転に自信がありますね。タクシーの運転手なので。	Well, I'm a taxi driver, so I'm good at driving.	y
person 1	タクシーの運転手さんだったんですね。わたし、電車通勤なので、あまりタクシーに乗る機会ないんですけど、運転うまい人って憧れます。	Oh, you're a taxi driver? I commute by train, so I don't often have the opportunity to take a taxi, but I'd love to be someone who is good at driving.	y
person 2	わたしは記憶に自信がないので記憶力のいい人に憧れますね。	I'm not confident about my memory, so I'd love to be someone who is good at remembering things.	y
person 1	記憶力の良い人かぁ。たしかに、その才能って色んな所で活躍しそうですよね。	A person who is good at remembering things? That's certainly an ability that would be useful in a range of different situations.	y
person 2	どんな時も重宝されますね。双子の兄弟がいて兄はすごく記憶力があったので羨ましいです。	Yeah, it could come in handy at any time. I'm a twin, and my elder brother, has an excellent memory, so I'm envious.	y
person 1	双子のお兄さんがいらっしゃるんですか？わたしは、それだけで羨ましいって思っちゃいますけど。ところで、アウトドアとかって興味あります？	Oh, you have a twin brother? I think I'm jealous of that fact alone. By the way, are you interested in outdoor activities?	y
person 2	アウトドアはあまり興味ないですね。アウトドアとは正反対の繁華街に住んでますしね。アウトドア好きなのですか？	No, the outdoors doesn't particularly interest me. For one thing, I live in a downtown area that is the exact opposite of the great outdoors. Do you enjoy outdoor activities?	y
person 1	わたしも、アウトドアとは無縁の生活だったんですが、キャンプに興味が湧きまして。まぁ、虫が苦手だから難しいのかもしれませんけど。	Well, my day-to-day life is also far removed from the great outdoors, but I've recently become interested in the idea of camping. Although, I don't like bugs and creepy-crawlies, so it might be difficult.	y
person 2	虫はなかなか厳しいですね。一度兄の家族とキャンプに行きましたが子供の遊ぶ声は懐かしい気持ちにしてくれますね。	Yeah, bugs are quite a bother in nature. I went camping with my brother and his family once, and the sound of the children's voices when they playing made me feel nostalgic.	y
