# Supplementary material
Source: ML conference proceedings conference paper supplement (https://aclanthology.org/2022.eval4nlp-1.9)
Supplement: SupplementaryMaterial [file 0083.xlsx]

## Sheet: Sheet1
person	source	translation	evaluation: is this a good translation?
person 1	こんにちは！わたし、経理の仕事をしているので、数字に強いんですよー。あなたは何か得意なこと、あります？	Hi, I'm working for an accounting firm, so are you good at numbers?	y
person 2	わたしは運転に自信がありますね。タクシーの運転手なので。	I'm a taxi driver.	y
person 1	タクシーの運転手さんだったんですね。わたし、電車通勤なので、あまりタクシーに乗る機会ないんですけど、運転うまい人って憧れます。	You know, I was a taxi driver, so I don't have a very good time getting a taxi, so I don't have much chance of driving a taxi.	y
person 2	わたしは記憶に自信がないので記憶力のいい人に憧れますね。	I don't think I'm a good person because I'm not sure I can remember my memories.	n
person 1	記憶力の良い人かぁ。たしかに、その才能って色んな所で活躍しそうですよね。	Well, that's exactly what a good man would do for a lot of genius.	y
person 2	どんな時も重宝されますね。双子の兄弟がいて兄はすごく記憶力があったので羨ましいです。	Every time a treasure was raised, his brother was very lucky to have a brother.	n
person 1	双子のお兄さんがいらっしゃるんですか？わたしは、それだけで羨ましいって思っちゃいますけど。ところで、アウトドアとかって興味あります？	Do you think I'm the only one who can envy a twin brother, by the way, like the door or the door?	n
person 2	アウトドアはあまり興味ないですね。アウトドアとは正反対の繁華街に住んでますしね。アウトドア好きなのですか？	You don't really care about the door door, do you?	n
person 1	わたしも、アウトドアとは無縁の生活だったんですが、キャンプに興味が湧きまして。まぁ、虫が苦手だから難しいのかもしれませんけど。	I've never lived with a wolf door, but I'm not very interested in bugs.	n
person 2	虫はなかなか厳しいですね。一度兄の家族とキャンプに行きましたが子供の遊ぶ声は懐かしい気持ちにしてくれますね。	You know, my brother and I have been having a hard time playing with the camp for a while.	y
