# Supplementary material
Source: ML conference proceedings conference paper supplement (https://aclanthology.org/2022.eval4nlp-1.9)
Supplement: SupplementaryMaterial [file 0084.xlsx]

## Sheet: Sheet1
person	source	translation	evaluation: is this a good translation?
person 1	こんばんは、わたしは今繁華街に住んでるのですがどのような場所に住んでいますか？	Hello, I'm living in a downtown city right now. What kind of place do you live?	n
person 2	わたしは、普通のアパートに、兄弟と暮らしています。	I live with my brother in a normal apartment.	y
person 1	そうなのですね。わたしにも双子の兄弟、兄がいます。	Well, I have a twin brother, too.	y
person 2	そうだったんですか。ご結婚はされてるんですか？わたし、長男なんですけど、女性が苦手なのでなかなか結婚相手を見つけられなくて。	Is that so, because I'm married to a young man who can't find a married woman?	n
person 1	結婚はしていないですね。独り身でして寂しくタクシードライバーの仕事をしています。	You're not married. You're working alone with a taxi driver.	n
person 2	タクシーの運転手さん？わたしはバスの運転手なんです。奇遇ですね！	My taxi driver is a strange coincidence!	n
person 1	運転手繋がりですね！バスはタクシーよりうんと難しそうですね。	The bus seems to be more difficult than a taxi.	y
person 2	そんなことないですよ～。運転の大変さに変わりはありません。でも、お互い、女性の少ない職場で苦労しますね。	It's not going to change, but it's not going to change a lot of work between women and women.	n
person 1	なかなか出会いがないですね。タクシーは他の方と生活リズムも違うので難しいです。	Well, it's hard to find a cab, but it's hard to live with other drivers.	y
person 2	そうですよね。わたしは巡回ですが、タクシーはそうもいきませんもんね。ところで料理はされます？	Yeah, I'm a patrol patrol, but I can't get a cab, can I, by the way?	n
person 1	料理はせずウーバーイーツばかりです。料理しますか？	Do you have anything to cook, Woolitz?	y
person 2	はい。焼きそばを作るのが得意なんです。良かったら、今度食べに来ませんか？	Yes, I'm very good at building fire. Would you like to come and eat next time?	y
