# Supplementary material
Source: ML conference proceedings conference paper supplement (https://aclanthology.org/2022.eval4nlp-1.9)
Supplement: SupplementaryMaterial [file 0084.xlsx]

## Sheet: Sheet1
person	source	translation	evaluation: is this a good translation?
person 1	こんばんは、わたしは今繁華街に住んでるのですがどのような場所に住んでいますか？	Good evening, I currently live in a downtown area, what sort of area do you live in?	y
person 2	わたしは、普通のアパートに、兄弟と暮らしています。	I just live in a fairly ordinary apartment, with my brother.	y
person 1	そうなのですね。わたしにも双子の兄弟、兄がいます。	Fair enough. I also have a twin elder brother.	y
person 2	そうだったんですか。ご結婚はされてるんですか？わたし、長男なんですけど、女性が苦手なのでなかなか結婚相手を見つけられなくて。	Oh really? And are you married? I'm the eldest in my family, and I'm not very good with women, so I haven't been able to find a marriage partner.	y
person 1	結婚はしていないですね。独り身でして寂しくタクシードライバーの仕事をしています。	Ah, so you're not married. I'm single and lonely, and I work as a taxi driver.	n
person 2	タクシーの運転手さん？わたしはバスの運転手なんです。奇遇ですね！	You're a taxi driver? What a coincidence, I'm a bus driver!	y
person 1	運転手繋がりですね！バスはタクシーよりうんと難しそうですね。	We share a connection then, because we're both drivers! A bus seems a lot harder to drive than a taxi, though.	y
person 2	そんなことないですよ～。運転の大変さに変わりはありません。でも、お互い、女性の少ない職場で苦労しますね。	That's not actually the case. The level of difficulty of driving it remains the same. However, it's hard isn't it, because we both work jobs where there are few women.	y
person 1	なかなか出会いがないですね。タクシーは他の方と生活リズムも違うので難しいです。	Yeah, it's hard for me to meet anyone. It's difficult when driving a taxi because it puts your daily routine out of sync with everybody else.	y
person 2	そうですよね。わたしは巡回ですが、タクシーはそうもいきませんもんね。ところで料理はされます？	Yes, it must be. I work shifts, but I guess you can't get away with doing that as a taxi driver. Incidentally, do you cook for yourself?	y
person 1	料理はせずウーバーイーツばかりです。料理しますか？	No, I don't cook, I'm constantly ordering food from Uber Eats. Do you cook?	y
person 2	はい。焼きそばを作るのが得意なんです。良かったら、今度食べに来ませんか？	Yes, I'm particularly good at making stir-fried noodles. Why don't you come round and try them sometime, if you'd like?	y
