# Supplementary material
Source: ML conference proceedings conference paper supplement (https://aclanthology.org/2022.eval4nlp-1.9)
Supplement: SupplementaryMaterial [file 0085.xlsx]

## Sheet: Sheet1
person	source	translation	evaluation: is this a good translation?
person 1	こんばんは！今夜はもう、夕飯は済ませましたか？	Good evening. Did you finish dinner tonight?	n
person 2	あ、こんばんわ。まだなんですよ。仕事の前には何か食べておかないといけないんですけど、つい忙しくって。食べ物を作る仕事ですから。	Well, I'm not sure yet, but I have to get something to eat before work.	n
person 1	おや、そんなに忙しいお仕事なの？何の仕事をしてるの？	Well, what are you doing so busy doing?	n
person 2	いわゆるパティシエです。このシーズンは結構忙しくって。あ、ごめんなさい、あなたはお仕事は何でしたっけ？	I'm sorry about this season, but what was your job?	n
person 1	わたしはバスの運転手してます。いまから自慢のお手製焼きそばを食おうと思ってたところなんですよ。あなたは、パティシエってことは甘党ってこと？	I was just about to burn your bus driver right now, and you're proud to eat your party right now.	n
person 2	ああ、それは大変なお仕事ですね。私ですか？ いえ、大のお酒好きです。占いを信じるたちなんで、今日は何色のお酒にしようか、とか何をツマミにしようかとか。	No, I'm trying to buy us a lot of booze today, don't you think?	y
person 1	ほほう、占いとは面白いですね！占いって、特に女性が大好きですよねー。	Well, I don't like women who don't love women, do I?	y
person 2	そうですよね。私はどちらかと言うと悲観的に物を考えるので、占いで一歩背中を押す癖が付いてしまったようです。失敗しても占いのせいにできますしね。	Yeah, well, I guess if I told you I was either either either sad or unhappy or unhappy, I'd push back in the back of my back!	n
person 1	なるほど、なるほど！それは占いの良い活用方法だと思いますよ！わたしは女性と会話するのが下手なので、占いをネタにしてみようかな。	Well, I think that's a really good way to talk to a woman, so let's see if it's a bad idea to talk to a woman.	n
person 2	それはイケると思いますよ。女性のいる席で盛り上がれるか占ってみましょうか？	Let's see if it's good for a woman's seat!	n
person 1	あ！それ名案です。一緒に暮らしている弟に合コンを主催してもらいますので、是非、一緒に参加してください！	Well, that's a good idea, because we're here with your brother, Spook!	y
person 2	ええ是非！ 私同様ネガティブな友達で良ければ連れて行きます！	Yes, I'll take him as a friend of Nevada!	y
