# Supplementary material
Source: ML conference proceedings conference paper supplement (https://aclanthology.org/2022.eval4nlp-1.9)
Supplement: SupplementaryMaterial [file 0085.xlsx]

## Sheet: Sheet1
person	source	translation	evaluation: is this a good translation?
person 1	こんばんは！今夜はもう、夕飯は済ませましたか？	Good evening! Have you already had dinner this evening?	y
person 2	あ、こんばんわ。まだなんですよ。仕事の前には何か食べておかないといけないんですけど、つい忙しくって。食べ物を作る仕事ですから。	Oh, good evening. Not yet. I know I should eat something before going to work, but I've been busy. I make food in my job, you see.	y
person 1	おや、そんなに忙しいお仕事なの？何の仕事をしてるの？	Oh, is it really such a busy job? What do you do?	y
person 2	いわゆるパティシエです。このシーズンは結構忙しくって。あ、ごめんなさい、あなたはお仕事は何でしたっけ？	I'm what you'd call a patissier. It gets pretty busy in this season. Oh, I'm sorry, what was you job again?	y
person 1	わたしはバスの運転手してます。いまから自慢のお手製焼きそばを食おうと思ってたところなんですよ。あなたは、パティシエってことは甘党ってこと？	I'm a bus driver. I was just about to eat some of my famous homemade stir-fried noodles. If you're a patissier, does that mean you have a sweet tooth?	y
person 2	ああ、それは大変なお仕事ですね。私ですか？ いえ、大のお酒好きです。占いを信じるたちなんで、今日は何色のお酒にしようか、とか何をツマミにしようかとか。	Oh, that's a hard job. Me? No, I'm a big drinker. I believe in fortunes, and I use them to guide me in my choice of what colour alcoholic beverage I should have each day, and what kind of snack to pair with it.	y
person 1	ほほう、占いとは面白いですね！占いって、特に女性が大好きですよねー。	Oh, fortunes you say, that's interesting! Fortunes tend to be very popular with women, right?	y
person 2	そうですよね。私はどちらかと言うと悲観的に物を考えるので、占いで一歩背中を押す癖が付いてしまったようです。失敗しても占いのせいにできますしね。	Yeah. I tend to be rather pessimistic, and I think I've developed a habit of using fortunes to prop me up and give me encouragement. Because, then, if you do fail at something, you can just blame it on your fortune.	y
person 1	なるほど、なるほど！それは占いの良い活用方法だと思いますよ！わたしは女性と会話するのが下手なので、占いをネタにしてみようかな。	I see! I think that's a good way to use fortunes! I'm not very good at talking to women, but perhaps I'll try using fortunes as a conversation topic.	y
person 2	それはイケると思いますよ。女性のいる席で盛り上がれるか占ってみましょうか？	I think that would go down well. Shall I read your fortune to see if that would get the conversation flowing at a gathering with women?	y
person 1	あ！それ名案です。一緒に暮らしている弟に合コンを主催してもらいますので、是非、一緒に参加してください！	Oh, that's a good idea! I'll get my brother, who lives with me, to organise a mixer party, so you should definitely come along!	y
person 2	ええ是非！ 私同様ネガティブな友達で良ければ連れて行きます！	Yeah, definitely! If another pessimistic friend like me is okay, I'll bring them along, too!	y
