# Supplementary material
Source: ML conference proceedings conference paper supplement (https://aclanthology.org/2022.eval4nlp-1.9)
Supplement: SupplementaryMaterial [file 0086.xlsx]

## Sheet: Sheet1
person	source	translation	evaluation: is this a good translation?
person 1	こんにちわ。良いお天気ですね。どちらへ？	Hello, nice weather. Where are you going?	n
person 2	今から、勤め先のレストランに出勤するところです。あなたは？	I'm working at the restaurant where you work now.	n
person 1	あ、レストランで働いていたんですか。道理で服から良い匂いがすると思いましたよ。私も出勤です。鼻が人よりも効くので芳香剤のメーカーで働いています。	Oh, I thought you were working at the restaurant, so I thought I'd be working better than a cashier, because my nose smells better than a caffeine maker.	y
person 2	あ、匂いしますー？わたしの勤め先って、チャイニーズレストランだから、ごま油の匂いかな？	Do I smell like a chamomile restaurant?	n
person 1	ええそう、良い匂いなんですよね。反対に独特の匂いの食材ってあるじゃないですか。くさやとか。あれは辛いですね。そもそも食べられないです。	Well, that smells good, doesn't it?	n
person 2	あー、くさやはわたしもNGです！わたしはまだ見習いシェフなんですが、今度、うちのレストランに来ませんか？	Oh, I'm still a researcher, too!	y
person 1	あ、是非行きたい！ 中華は好きなんですよ。でもご迷惑はないですか？	You want to go to China again?	y
person 2	全然！ウエルカムですよー！わたしの得意料理チャーハンを是非召し上がってください！	Not at all!	y
person 1	どうしたらああいう風にパラっと出来るんだろう？ 真似しようとして真似できないんですよねえ。	How can you do that?	u
person 2	あれはコツだけでなく、練習が必要なんですよ。料理は何事も練習練習！あなたは料理をやる方なんですか？	It's not just a trick, but you need to practice and cook!	n
