# Supplementary material
Source: ML conference proceedings conference paper supplement (https://aclanthology.org/2022.eval4nlp-1.9)
Supplement: SupplementaryMaterial [file 0086.xlsx]

## Sheet: Sheet1
person	source	translation	evaluation: is this a good translation?
person 1	こんにちわ。良いお天気ですね。どちらへ？	Hello, nice weather, isn't it. Where are you off to?	y
person 2	今から、勤め先のレストランに出勤するところです。あなたは？	I'm off to the restaurant I work at. What about you?	y
person 1	あ、レストランで働いていたんですか。道理で服から良い匂いがすると思いましたよ。私も出勤です。鼻が人よりも効くので芳香剤のメーカーで働いています。	Oh, you work at a restaurant? No wonder I thought there was a nice smell emanating from your clothes then. I'm also on my way to work. I work for a manufacturer of fragrances because my sense of smell is better than most people's.	y
person 2	あ、匂いしますー？わたしの勤め先って、チャイニーズレストランだから、ごま油の匂いかな？	What, my clothes smell? The place where I work is a Chinese restaurant, so perhaps it's the smell of the sesame oil?	y
person 1	ええそう、良い匂いなんですよね。反対に独特の匂いの食材ってあるじゃないですか。くさやとか。あれは辛いですね。そもそも食べられないです。	Yeah, it smells good. There are some very pungent-smelling foods as well though, aren't there? Like dried, salted fish. That stuff's awful. Why on earth would you eat that?	y
person 2	あー、くさやはわたしもNGです！わたしはまだ見習いシェフなんですが、今度、うちのレストランに来ませんか？	Oh yeah, I can't stand that stuff either. I'm still just an apprentice chef, but why don't you come down to the restaurant some time?	y
person 1	あ、是非行きたい！ 中華は好きなんですよ。でもご迷惑はないですか？	Yes, I'd love to go! I like Chinese food. But, wouldn't it cause any inconvenience?	y
person 2	全然！ウエルカムですよー！わたしの得意料理チャーハンを是非召し上がってください！	Not at all! You'd be more than welcome there! Please come and try some of my fried rice, it's my specialty!	y
person 1	どうしたらああいう風にパラっと出来るんだろう？ 真似しようとして真似できないんですよねえ。	How are you able to make the rice non-sticky like that? I try to copy it, but I can't do it.	y
person 2	あれはコツだけでなく、練習が必要なんですよ。料理は何事も練習練習！あなたは料理をやる方なんですか？	There's not only a knack to it, it requires practice. Everything in cooking is just practice, practice, practice! Do you do any cooking?	y
