# Supplementary material
Source: ML conference proceedings conference paper supplement (https://aclanthology.org/2022.eval4nlp-1.9)
Supplement: SupplementaryMaterial [file 0087.xlsx]

## Sheet: Sheet1
person	source	translation	evaluation: is this a good translation?
person 1	お久しぶりですね。最近はどうされていましたか？	Good to see you again. What have you been up to lately?	y
person 2	ああ、こんにちわ。いや、子供の世話で大忙しでしたよ。シングルファーザーって言うのかイクメンって言うのか、中々骨が折れますね。あなたはどうしていました？	Oh, hello. Nothing much, I've just been busy looking after my child. It's hard work being a single father, raising my kid on my own. What've you been doing?	y
person 1	それは大変ですね！わたしはレストランでシェフをしてますよ。まだ見習いですがね。	Yeah, that must be hard for you. I'm now working as a chef at a restaurant. I'm still just an apprentice at the moment, though.	y
person 2	あ、そうでしたか。それは知らなかった。覚える事が沢山あるんでしょうね。	Oh, I didn't know that. There must be many things for you to learn.	y
person 1	そうですね。おかげで炒飯を作るのが得意になりましたよ。あたなはなんのお仕事をされているんですか？	That's right, but I've become really good at cooking fried rice as a result. What kind of job do you do?	y
person 2	自動車の整備士です。普段だったら忙しいんですが、コロナ以来商用車の仕事が減ってしまって。だから子供にヒゲ引っ張られたりしている訳です。	I'm an auto mechanic. Usually I'd be busy, but since the Covid pandemic I've had a lot less work on commercial vehicles. That's why I've currently got my kid playing around tugging at my beard and things.	y
person 1	そうなんですね。お子さんの世話にお仕事に大変ですね。体調などは崩されていませんか？	Oh, I see. It must be hard taking care of a child whilst also working. Do you ever get ill?	y
person 2	いやあはは、運動部出身なんで、そこは気合とガッツで…どうにかなればいいなあと。	Haha, well, I used to be in the sports club, so I just get psyched up...knowing it will be okay eventually.	y
person 1	おお、運動されていたんですね！もし元気がなくなったら辛いものを食べるのをおすすめしますよ！特に麻婆豆腐はイチオシです！	Oh, you used to do sports, did you? Well, if you do get sick, I recommend eating something spicy. I especially recommend mapo tofu!	n
person 2	でしょでしょ？ 辛い物大好きなんですよ。あれ食べるとどこかから元気を集めて来てくれる感じがして。今度お店に行きますよ！	I know, right? I love spicy food. When I eat it, it feels like it accumulates energy inside of me from somewhere. I'll come to your restaurant sometime!	y
