# Supplementary material
Source: ML conference proceedings conference paper supplement (https://aclanthology.org/2022.eval4nlp-1.9)
Supplement: SupplementaryMaterial [file 0087.xlsx]

## Sheet: Sheet1
person	source	translation	evaluation: is this a good translation?
person 1	お久しぶりですね。最近はどうされていましたか？	It's been a while. How have you been lately?	y
person 2	ああ、こんにちわ。いや、子供の世話で大忙しでしたよ。シングルファーザーって言うのかイクメンって言うのか、中々骨が折れますね。あなたはどうしていました？	Oh, hi, I've been busy taking care of my kids. What about your broken bone?	n
person 1	それは大変ですね！わたしはレストランでシェフをしてますよ。まだ見習いですがね。	What about me, Chef?	y
person 2	あ、そうでしたか。それは知らなかった。覚える事が沢山あるんでしょうね。	Oh, well, there must have been a lot of things that you didn't know.	y
person 1	そうですね。おかげで炒飯を作るのが得意になりましたよ。あたなはなんのお仕事をされているんですか？	Well, thank you very much. What did you do for a living?	n
person 2	自動車の整備士です。普段だったら忙しいんですが、コロナ以来商用車の仕事が減ってしまって。だから子供にヒゲ引っ張られたりしている訳です。	I'm a car engineer, but I've been busy since I was a kid from Colorado, and I've been in a lot of trouble since I was a kid.	y
person 1	そうなんですね。お子さんの世話にお仕事に大変ですね。体調などは崩されていませんか？	Well, it's hard for you to take care of your kids, isn't it?	y
person 2	いやあはは、運動部出身なんで、そこは気合とガッツで…どうにかなればいいなあと。	Well, that's why I'm from the jogging club and that's what I'm supposed to do.	n
person 1	おお、運動されていたんですね！もし元気がなくなったら辛いものを食べるのをおすすめしますよ！特に麻婆豆腐はイチオシです！	Oh, if you're tired of eating tofu, especially if you're hungry!	y
person 2	でしょでしょ？ 辛い物大好きなんですよ。あれ食べるとどこかから元気を集めて来てくれる感じがして。今度お店に行きますよ！	You love that restaurant, don't you?	y
