# Supplementary material
Source: ML conference proceedings conference paper supplement (https://aclanthology.org/2022.eval4nlp-1.9)
Supplement: SupplementaryMaterial [file 0088.xlsx]

## Sheet: Sheet1
person	source	translation	evaluation: is this a good translation?
person 1	やあやあ、こんにちわ！ お元気そうですね！	Yo! You're looking well!	y
person 2	柔道部でしたらからね、元気だけが取り柄なんですよ！あなたは調子はどうですか？	It's because I used to be in the judo club, being full of spirit is about all I've got going for me though! How are you doing?	y
person 1	お、同じ運動部だ。柔道は面白いですよねえ。私は４番目の兄貴の勧めヨガを始めたおかげか、調子いいですよ。９人兄弟の一番下なんで、他の８人が８人とも色んな健康法を薦めて来るんで混乱してますが。	Oh, you were in a sports club too then. Judo is fun, isn't it? I'm doing well, which might be down to the fact that I've started doing yoga, after my 4th eldest brother recommended it. I'm the youngest of nine siblings, and the other eight all recommend various things for health, and it gets confusing.	y
person 2	9人兄弟とはすごいですね！うちは子どもが2人いますが、2人でも大変なので、あなたの親御さんを尊敬しますよ！	Nine siblings is a lot! I have two kids, but it's difficult even with just two of them, so I respect your parents!	y
person 1	男の子だったら大変ですよねえ。ウチは男なんで毎日取っ組み合いですよ。ああこんな時女房がいてくれたらなあ。お父っつぁんそれは言わない約束でしょう？	And it's hard if they're boys. I've got a boy, and it's a constant struggle every day. I'm like, "Oh, if only my wife was around at times like this," and he goes, "Dad, you promised not to say that anymore, remember?"	y
person 2	あはは。うちも子どもの口が達者で困ってますよ。パパは警察官の癖に食べ物の好き嫌いが多くてダメだねなんていつも言われてます。	Hahaha! My kids are talkative, which is a problem. They're always telling me off for being a very picky eater even though I'm a police officer.	y
person 1	法と秩序の番人たる警察官が好き嫌いがあってはならない、と私の尊敬するエジソンも言っています言ってませんけど。何が苦手なんですか？	I look up to Thomas Edison, and he said that police officers, who are the guardians of law and order, should not be picky eaters, just kidding. What don't you like?	y
person 2	いやー、本当に苦手なものが多くて。あげはじめたら明日になってしまうかもしれませんよ。	Let's see, there are just so many things that I don't like. If I started listing them all, we'd be here all night.	y
person 1	そうですねえ、薬だと思って口にするか、ペースト状にしてご飯に載せるか、ひったすら炒めて何だか分からなくしちゃうか。	I see, well couldn't you just think of it as medicine, or making it into a paste and put it on rice, or just fry it all up until you can't tell what it is any more?	y
person 2	あはは。まるで子どもですね！情けないなあ。わたしの妻は年上で昭和生まれなんですが、これだから平成生まれの男はと毎日ため息をつかれていますよ。	Hahaha! Like a baby! I'm pathetic, aren't I? My wife is older than me and was born in the Showa era, and she sighs at me every day, saying, "This is why men born in the Heisei era are no good."	y
