# Supplementary material
Source: ML conference proceedings conference paper supplement (https://aclanthology.org/2022.eval4nlp-1.9)
Supplement: SupplementaryMaterial [file 0088.xlsx]

## Sheet: Sheet1
person	source	translation	evaluation: is this a good translation?
person 1	やあやあ、こんにちわ！ お元気そうですね！	Hello, hello, how are you?	y
person 2	柔道部でしたらからね、元気だけが取り柄なんですよ！あなたは調子はどうですか？	How are you doing, sir?	y
person 1	お、同じ運動部だ。柔道は面白いですよねえ。私は４番目の兄貴の勧めヨガを始めたおかげか、調子いいですよ。９人兄弟の一番下なんで、他の８人が８人とも色んな健康法を薦めて来るんで混乱してますが。	Same way, I'm starting to wonder if eight brothers are starting to get the best health system in the eighth grade.	n
person 2	9人兄弟とはすごいですね！うちは子どもが2人いますが、2人でも大変なので、あなたの親御さんを尊敬しますよ！	We both have nine brothers, but we respect your parents!	n
person 1	男の子だったら大変ですよねえ。ウチは男なんで毎日取っ組み合いですよ。ああこんな時女房がいてくれたらなあ。お父っつぁんそれは言わない約束でしょう？	If we had a boy, we'd have a wife like this every day.	y
person 2	あはは。うちも子どもの口が達者で困ってますよ。パパは警察官の癖に食べ物の好き嫌いが多くてダメだねなんていつも言われてます。	My father always said that you don't like food, do you?	n
person 1	法と秩序の番人たる警察官が好き嫌いがあってはならない、と私の尊敬するエジソンも言っています言ってませんけど。何が苦手なんですか？	I don't like law and order cops, but I don't like Edison saying I don't like him either, either.	n
person 2	いやー、本当に苦手なものが多くて。あげはじめたら明日になってしまうかもしれませんよ。	No, I'm sure there'll be a lot of bad things really bad after tomorrow.	n
person 1	そうですねえ、薬だと思って口にするか、ペースト状にしてご飯に載せるか、ひったすら炒めて何だか分からなくしちゃうか。	Look, I didn't know if it was medicine or anything, but I didn't even know if I'd put up with anything to eat.	n
person 2	あはは。まるで子どもですね！情けないなあ。わたしの妻は年上で昭和生まれなんですが、これだから平成生まれの男はと毎日ため息をつかれていますよ。	It's like I'm a poor, old man who's been living with my wife's heart all day!	n
