# Supplementary material
Source: ML conference proceedings conference paper supplement (https://aclanthology.org/2022.eval4nlp-1.9)
Supplement: SupplementaryMaterial [file 0089.xlsx]

## Sheet: Sheet1
person	source	translation	evaluation: is this a good translation?
person 1	こんにちは！お元気でしたか？	Hi! How have you been?	y
person 2	ああ、久しぶりです。こないだ成人しましたよ。２０００年ミレニアム生まれなもんで。	Oh, good to see you again. I'm officially an adult now, because I'm a Millennium baby, born in the year 2000.	y
person 1	おめでとうございます！2000年と言うことは平成生まれですよね。私と一緒だ！	Congratulations! That means you were born in the Heisei era if you were born in the year 2000 then, doesn't it. That's the same as me!	y
person 2	そうですよね。令和になっちゃったものなあ。急に老け込んだ感じがしますよ。運動とかされてますか？	Oh right. We're in the Reiwa era now, though. I feel old all of a sudden. Do you exercise or anything?	y
person 1	わたしは柔道をやってます。警察官なもので必須なんですよね。あなたは運動は？	I do judo. It's essential for me as a police officer. Do you exercise?	y
person 2	あそうか、お巡りさんって武道が必須なんでしたよね。私は高校の頃卓球部でしたが、今でもその頃の仲間と会って「温泉卓球」で遊んでます。皆温泉が好きなんで。	Oh yeah, I guess martial arts would be essential if you're a policeman. I played table tennis in high school, and I still meet up with my friends from the club, and we play table tennis at hot spring bathhouses, because we all love to go to hot springs.	y
person 1	温泉で卓球！いいですねー。わたしも非番の日に子ども2人と行きたいな〜。	Playing table tennis at a hot spring sounds marvelous. I'd like to take my two children when I'm off duty.	y
person 2	あ、私てっきり独身だと思ってましたよ。お子さんもいて、二人も。ああ、知らなかった。	Oh, I totally thought you were single, but you've got not one but two children. Huh, I didn't know that.	y
person 1	そうなんですよ。結構若い頃に結婚しましてね。あなたは今お仕事は？大学生？	That's right. I got married at a pretty young age. And are you working, or a university student?	y
person 2	ええ、今２年です。多分あと６年もあれば卒業できる見込みです。	Yeah, I'm in my second year of university. I expect to be able to graduate in six years.	y
