# Supplementary material
Source: ML conference proceedings conference paper supplement (https://aclanthology.org/2022.eval4nlp-1.9)
Supplement: SupplementaryMaterial [file 0089.xlsx]

## Sheet: Sheet1
person	source	translation	evaluation: is this a good translation?
person 1	こんにちは！お元気でしたか？	Hello. How are you?	y
person 2	ああ、久しぶりです。こないだ成人しましたよ。２０００年ミレニアム生まれなもんで。	Oh, it's been a while since I've been here. It's been 200 years since I was born.	n
person 1	おめでとうございます！2000年と言うことは平成生まれですよね。私と一緒だ！	Congratulations, you've been born with me for 2,000 years!	n
person 2	そうですよね。令和になっちゃったものなあ。急に老け込んだ感じがしますよ。運動とかされてますか？	Oh, yeah, that's right. You feel like you're having an epiphany crisis?	y
person 1	わたしは柔道をやってます。警察官なもので必須なんですよね。あなたは運動は？	I'm doing a good job with a police officer, right?	n
person 2	あそうか、お巡りさんって武道が必須なんでしたよね。私は高校の頃卓球部でしたが、今でもその頃の仲間と会って「温泉卓球」で遊んでます。皆温泉が好きなんで。	Yeah, well, I used to love the way I met all my high school officers in the hot pool, but now I like to play with them in the sun.	n
person 1	温泉で卓球！いいですねー。わたしも非番の日に子ども2人と行きたいな〜。	We all want to go to the hot sun and have a warm day and a warm day.	n
person 2	あ、私てっきり独身だと思ってましたよ。お子さんもいて、二人も。ああ、知らなかった。	Oh, I thought you two were single, and I didn't know.	y
person 1	そうなんですよ。結構若い頃に結婚しましてね。あなたは今お仕事は？大学生？	Well, you were married when you were young, weren't you?	n
person 2	ええ、今２年です。多分あと６年もあれば卒業できる見込みです。	Yeah, probably 26 years from now, maybe six years from now.	n
