# Supplementary material
Source: ML conference proceedings conference paper supplement (https://aclanthology.org/2022.eval4nlp-1.9)
Supplement: SupplementaryMaterial [file 0090.xlsx]

## Sheet: Sheet1
person	source	translation	evaluation: is this a good translation?
person 1	こんにちわ、お久しぶりですがどうされてましたか？	Hey, I haven't seen you in a long time, what have you been up to?	y
person 2	実は夫が亡くなりましてね。子どもと2人で毎日目まぐるしく過ごしてますよ。	Actually my husband passed away recently, so every day is a bit hectic when it's just me and my child.	n
person 1	ええっ、それは知らなかったとは言え。御胸中お察し申します。子供さん二人では色々大変でしょうね。	Oh no, I had no idea, but nevertheless, you have my sincerest condolences. It must be difficult for the two of you.	y
person 2	そうですね。まあ、落ち込んでばかりもいられないのでね。明るさだけがわたしの取り柄ですし。あなたはどうされていましたか？	Yes. But, I can't remain mournful forever. My cheerfulness is my one redeeming feature. What have you been up to?	y
person 1	今将来の事とか考えていて、あと２年で大学も出るので、その後は消防学校に入学したいと思っているんですよ。人を援ける仕事がしたんです。	I've been thinking about my future: I'll be finishing university in two more years, and I'm thinking of enrolling at a firefighting school after that. I want to do a job saving people.	y
person 2	わー！素敵ですね！消防学校ってキツいイメージがあるんですが、体力には自信があるんですか？	Wow! That's fantastic! I imagine firefighting school is quite demanding, but do you have confidence in your physical strength?	y
person 1	まあ、そこそこには。卓球部だったんで瞬発力は自信があるんですよ。所でお仕事はどうされるんですか？	Mmm, yeah, more or less. I used to be in the table tennis club, so I'm confident in my instantaneous power. Incidentally, what job do you do?	y
person 2	学生時代のバスケットボール部の友人と会社をやってますよ。まだ30代ですからね。子供のためにもバリバリ働かないと！	I run a company with a friend from my uni basketball club. I'm still in my thirties you see, so I have to work hard for my child!	y
person 1	あ、それは凄いなあ。学生時代の友人は信頼出来ますものね。え、何の会社ですか？	Oh, that's amazing. And you can rely on friends from your student days. Um, what kind of company is it?	y
person 2	旅行関係です。どこかご旅行をされる際はお手伝いしますよ！	It's travel-related. We can help you out when you're planning to travel somewhere!	y
