# Supplementary material
Source: ML conference proceedings conference paper supplement (https://aclanthology.org/2022.eval4nlp-1.9)
Supplement: SupplementaryMaterial [file 0090.xlsx]

## Sheet: Sheet1
person	source	translation	evaluation: is this a good translation?
person 1	こんにちわ、お久しぶりですがどうされてましたか？	Hello, how have you been?	y
person 2	実は夫が亡くなりましてね。子どもと2人で毎日目まぐるしく過ごしてますよ。	My husband died, and I've spent the rest of my life with my children.	y
person 1	ええっ、それは知らなかったとは言え。御胸中お察し申します。子供さん二人では色々大変でしょうね。	Well, I understand that it's hard for both of you to say that it was unaware of that.	n
person 2	そうですね。まあ、落ち込んでばかりもいられないのでね。明るさだけがわたしの取り柄ですし。あなたはどうされていましたか？	Well, what about me being depressed just because you're alone?	y
person 1	今将来の事とか考えていて、あと２年で大学も出るので、その後は消防学校に入学したいと思っているんですよ。人を援ける仕事がしたんです。	After the future, I was thinking about getting out of work two years later, and I'm thinking about getting out of work at the fire lab.	n
person 2	わー！素敵ですね！消防学校ってキツいイメージがあるんですが、体力には自信があるんですか？	- You have a great view of a firehouse, don't you?	n
person 1	まあ、そこそこには。卓球部だったんで瞬発力は自信があるんですよ。所でお仕事はどうされるんですか？	Well, there was a light turret there, so how do you expect to do your job?	n
person 2	学生時代のバスケットボール部の友人と会社をやってますよ。まだ30代ですからね。子供のためにもバリバリ働かないと！	You're still working for a college student, and you're not working with a $30 million company!	n
person 1	あ、それは凄いなあ。学生時代の友人は信頼出来ますものね。え、何の会社ですか？	Oh, that's great. What kind of friends do you trust in in a student's age?	n
person 2	旅行関係です。どこかご旅行をされる際はお手伝いしますよ！	I'll help you when you travel somewhere!	y
