# Supplementary material
Source: ML conference proceedings conference paper supplement (https://aclanthology.org/2022.eval4nlp-1.9)
Supplement: SupplementaryMaterial [file 0091.xlsx]

## Sheet: Sheet1
person	source	translation	evaluation: is this a good translation?
person 1	こんにちは。お元気でしたか？	Hello, have you been keeping well?	y
person 2	ええ、変わりなく元気ですよ！最近ウニのおいしさに気付きまして。たまの楽しみにしています。	Yes, I'm fine, as always! I recently came to realise how nice sea urchins actually are. I look forward to eating them once in a while.	y
person 1	ウニですか！豪華ですね。海鮮がお好きなんですか？	Sea urchins?! Very fancy. Do you like seafood then?	y
person 2	ええ、大好物です！牡蠣だけは苦手なんですが…。あなたはなにかお好きな食べ物ありますか？	Yes, I love it! I just don't really like oysters... Do you have any favourite foods?	y
person 1	そうですね。実は最近夫と死別しまして。なかなか食事が喉を通らないんですよ。あ、暗い話でごめんなさいね。	Yes, but, the thing is, my husband died recently, so I don't feel like eating. Oh, I'm sorry to bring up a sad topic.	y
person 2	いえいえ、それは大変でしたね。どうかあまり気を落とさないでください。	No not at all, that must have been a difficult time for you. Please try not to be downhearted.	y
person 1	ありがとうございます。子どもが1人いるんですが、心の支えになってくれて助かってますよ。	Thank you very much. I have a child, and they're helping out by giving me emotional support.	y
person 2	そうなんですね！よかったら今度気晴らしに海にでも行きませんか。わたしはサーフィンが得意なので、よく海に行くんですよ。	Oh that's good of them! If you'd like, how about we go to the seaside sometime as a diversion? I'm good at surfing, so I often go down to the sea.	y
person 1	サーフィンですか！素敵ですね！実は昔バスケットボール部だったので運動神経には自信があるんですよ。	Surfing? Wow, that's cool! I actually used to be in the basketball club, so I'm pretty confident in my athletic ability.	y
person 2	じゃあぜひ、いつかご一緒しましょう！実は海上保安官なので、海での安全はお任せください！	Well, let's definitely go sometime! I'm actually a coastguard, so you can leave safety at sea up to me!	y
