# Supplementary material
Source: ML conference proceedings conference paper supplement (https://aclanthology.org/2022.eval4nlp-1.9)
Supplement: SupplementaryMaterial [file 0091.xlsx]

## Sheet: Sheet1
person	source	translation	evaluation: is this a good translation?
person 1	こんにちは。お元気でしたか？	Hello. How are you?	y
person 2	ええ、変わりなく元気ですよ！最近ウニのおいしさに気付きまして。たまの楽しみにしています。	Oh, I'm fine. I'm looking forward to it.	n
person 1	ウニですか！豪華ですね。海鮮がお好きなんですか？	Do you like the hot sea?	n
person 2	ええ、大好物です！牡蠣だけは苦手なんですが…。あなたはなにかお好きな食べ物ありますか？	Yes, I do not like oysters, but do you like food?	n
person 1	そうですね。実は最近夫と死別しまして。なかなか食事が喉を通らないんですよ。あ、暗い話でごめんなさいね。	Well, actually, I haven't eaten much since I died with my husband recently, so I'm sorry about that very dark story.	n
person 2	いえいえ、それは大変でしたね。どうかあまり気を落とさないでください。	No, that was hard. Don't worry about it too much.	y
person 1	ありがとうございます。子どもが1人いるんですが、心の支えになってくれて助かってますよ。	Thank you. I have one child, but thank you very much for your support.	n
person 2	そうなんですね！よかったら今度気晴らしに海にでも行きませんか。わたしはサーフィンが得意なので、よく海に行くんですよ。	Well, if you don't mind, I'd like to go to the beach next time, because I'm very good at surfing.	y
person 1	サーフィンですか！素敵ですね！実は昔バスケットボール部だったので運動神経には自信があるんですよ。	You know, I was very confident that my nerves were used to be in the middle of a mineral movement!	n
person 2	じゃあぜひ、いつかご一緒しましょう！実は海上保安官なので、海での安全はお任せください！	Let me assure you, someday we'll be safe at sea!	n
