# Supplementary material
Source: ML conference proceedings conference paper supplement (https://aclanthology.org/2022.eval4nlp-1.9)
Supplement: SupplementaryMaterial [file 0092.xlsx]

## Sheet: Sheet1
person	source	translation	evaluation: is this a good translation?
person 1	久しぶりですね！最近どうされていたんですか？	How long have you been out here?	y
person 2	ほんとうにお久しぶりです！今は警備員として、仕事を頑張っていますよ。	I've been working as a guard for a long time now.	y
person 1	警備員のお仕事をされているんですね。わたしは海上保安官なので、お互い安全を守る仕事ですね！	You're working for the Coast Guard, so I'll protect both of you!	y
person 2	本当ですね！一家の大黒柱としても、やりがいのある仕事だと思っています。	I think it's the work of the family's big Black pillars.	n
person 1	そうですね。お仕事以外に何か趣味などはありますか？	Is there anything else you'd like to do for me?	y
person 2	実はカメを飼っていまして、なかなかかわいいですよ。あなたはなにか趣味などハマっていることありますか？	Actually, you have a turtle, so cute, do you have any hobby?	n
person 1	そうですね。最近はサーフィンをよくしていますね。実は結構うまいんですよ！	Well, you've been working very well lately, very well, very well, very well!	n
person 2	サーフィンができるなんてかっこいいですね！サーフィンを始めてから長いんですか？	How long has it been since you started working on the server?	n
person 1	そうですね、元々海が好きで小さな頃からやっています。あなたは何かスポーツはやられますか？	Well, since I was little, did you do anything you like sports?	n
person 2	そうだったんですね！わたしは学生時代に剣道部に入っていたのですが、最近はスポーツに縁遠い生活でして。	Yes, I've been in the middle of a long time in college, and I've been in love with a sword in a long time.	n
