# Supplementary material
Source: ML conference proceedings conference paper supplement (https://aclanthology.org/2022.eval4nlp-1.9)
Supplement: SupplementaryMaterial [file 0092.xlsx]

## Sheet: Sheet1
person	source	translation	evaluation: is this a good translation?
person 1	久しぶりですね！最近どうされていたんですか？	Long time, no see! What have you been up to recently?	y
person 2	ほんとうにお久しぶりです！今は警備員として、仕事を頑張っていますよ。	It has been a long time, hasn't it? I'm currently doing my best in my job as a security guard.	y
person 1	警備員のお仕事をされているんですね。わたしは海上保安官なので、お互い安全を守る仕事ですね！	Oh, you're a security guard? I'm a coastguard, so it seems like we're both concerned in ensuring safety!	y
person 2	本当ですね！一家の大黒柱としても、やりがいのある仕事だと思っています。	That's true! It's also a rewarding job as the main breadwinner of the family.	y
person 1	そうですね。お仕事以外に何か趣味などはありますか？	That's true. Do you have any hobbies or anything outside of work?	y
person 2	実はカメを飼っていまして、なかなかかわいいですよ。あなたはなにか趣味などハマっていることありますか？	Well, I have a pet tortoise, who's pretty cute. Do you have any hobbies or anything that you're into right now?	y
person 1	そうですね。最近はサーフィンをよくしていますね。実は結構うまいんですよ！	Yes, I've been surfing a lot recently. I'm actually really good at it!	y
person 2	サーフィンができるなんてかっこいいですね！サーフィンを始めてから長いんですか？	It's cool that you're able to surf! Have you been surfing for a long time?	y
person 1	そうですね、元々海が好きで小さな頃からやっています。あなたは何かスポーツはやられますか？	Yeah, well, I've always loved the sea, so I've been surfing ever since I was little. Can you play any sports?	y
person 2	そうだったんですね！わたしは学生時代に剣道部に入っていたのですが、最近はスポーツに縁遠い生活でして。	I see! I did kendo when I was a student, but I haven't done any sports recently.	y
