# Supplementary material
Source: ML conference proceedings conference paper supplement (https://aclanthology.org/2022.eval4nlp-1.9)
Supplement: SupplementaryMaterial [file 0093.xlsx]

## Sheet: Sheet1
person	source	translation	evaluation: is this a good translation?
person 1	こんにちはー！元気にしてましたか？	Hi! How's it going?	y
person 2	こんにちは！元気にしています！あたたもお元気そうで、なによりです。	Hi! It's going well, thanks! You're looking good too, which is the most important thing.	y
person 1	はい、最近は毎日お金持ちになりたいなーなんて思いながら過ごしてますよ。	Yes I am. Recently I've been spending every day thinking about how nice it would be to be rich.	y
person 2	目標があることはとてもよいことですよ！わたしも今は僧侶として人々をよい方向に導けるよう修行中です。	Well, it's good to have a goal! I'm currently training as a monk so that I can lead people in a positive direction.	y
person 1	僧侶の方にそういっていただけるとなんだか嬉しいです！一家の大黒柱としてもっと頑張らなければですね。	It would be nice to receive that kind of guidance from a monk! I have to work harder as the main breadwinner of the family.	y
person 2	素晴らしい心構えですね。わたしはまだ実は両親と暮らしているので、そろそろ実家を出ねばと考えているところです。	That's a great attitude to have. I still live with my parents, so I'm thinking it's about time I moved out.	y
person 1	ありがとうございます！そうそう、何かペットって飼っていますか？最近カメを飼い始めたんですが、意外と可愛くて！	Thank you! Speaking of which, do you have any pets? I recently got a tortoise, and it's surprisingly cute!	y
person 2	カメとは珍しいですね！わたしも鳥を飼っていますが、色々喋ってくれるので楽しいですよ。	A tortoise? That's an unusual pet! I have a pet bird, and it's fun because it talks a lot.	y
person 1	鳥ですか！いいですね。おしゃべりするなんて賑やかで楽しそうです。	A bird? That's nice. It must be fun and lively to have it chattering away.	y
person 2	わたしは今20代前半ですが、小学生の頃からずっと鳥を飼ってるんです。でも変なことをしゃべると覚えられてしまうので、気を付けなければなりません！	I'm in my early twenties now, and I've had this bird since I was in primary school. You need to be careful though, because if you say something weird, the bird will pick it up!	y
