# Supplementary material
Source: ML conference proceedings conference paper supplement (https://aclanthology.org/2022.eval4nlp-1.9)
Supplement: SupplementaryMaterial [file 0093.xlsx]

## Sheet: Sheet1
person	source	translation	evaluation: is this a good translation?
person 1	こんにちはー！元気にしてましたか？	Hi, how are you?	y
person 2	こんにちは！元気にしています！あたたもお元気そうで、なによりです。	Hi, thank you very much.	n
person 1	はい、最近は毎日お金持ちになりたいなーなんて思いながら過ごしてますよ。	Yes, I've spent the rest of my life trying to be rich for the rest of my life.	y
person 2	目標があることはとてもよいことですよ！わたしも今は僧侶として人々をよい方向に導けるよう修行中です。	It's very good to have a target. I'm trained as a monk.	y
person 1	僧侶の方にそういっていただけるとなんだか嬉しいです！一家の大黒柱としてもっと頑張らなければですね。	I'm glad to be able to do better than to the monks' families!	n
person 2	素晴らしい心構えですね。わたしはまだ実は両親と暮らしているので、そろそろ実家を出ねばと考えているところです。	Well, it's a good thing I still think I'm still out there living with my parents.	n
person 1	ありがとうございます！そうそう、何かペットって飼っていますか？最近カメを飼い始めたんですが、意外と可愛くて！	Do you have any pets recently?	n
person 2	カメとは珍しいですね！わたしも鳥を飼っていますが、色々喋ってくれるので楽しいですよ。	I have a lot to talk about and a bird!	n
person 1	鳥ですか！いいですね。おしゃべりするなんて賑やかで楽しそうです。	Sounds like a good time to talk to a bird!	n
person 2	わたしは今20代前半ですが、小学生の頃からずっと鳥を飼ってるんです。でも変なことをしゃべると覚えられてしまうので、気を付けなければなりません！	I'm a 20-foot student, but I can't remember the strange bird from the moment I have a bird!	n
