# Supplementary material
Source: ML conference proceedings conference paper supplement (https://aclanthology.org/2022.eval4nlp-1.9)
Supplement: SupplementaryMaterial [file 0094.xlsx]

## Sheet: Sheet1
person	source	translation	evaluation: is this a good translation?
person 1	こんにちは。最近調子はいかがですか？	Hello, how have you been recently?	y
person 2	はい、元気なんですが、安月給が悩みです。	I'm fine, though I'm a little concerned about how little I make each month.	y
person 1	お金の悩みはつきませんよね。私も最近仏門に入ったばかりなので自由になるお金はなかなか。	Money is a constant concern, isn't it? I recently entered the Buddhist priesthood, so I don't really have any money that I can use freely.	y
person 2	お坊さんてことですか！初めてお会いしました！お仕事はお忙しいんですか？	You mean you're a monk?! You're the first monk I've ever met! Is that a busy job?	y
person 1	そうですね。まだまだ見習いですから下働きが多いですよ。あなたはお仕事は？	Yes. I'm still a trainee monk, so I have a lot of subordinate duties. What is your job?	y
person 2	ハヤシライスが好物で、専門店でアルバイトをしているんです！ハヤシライスはお好きですか？	Well, I like hashed beef and rice, so I work a part-time job at a restaurant that specialises in it! Do you like hashed beef and rice?	y
person 1	好きですよー！両親と同居しているので、なかなか食卓には出てきませんが。	Yes I do! Although, I live with my parents, and they don't often serve it.	y
person 2	それでしたら、いつかうちの店にも食べにいらしてください！今一緒に暮らしているパートナーも店で働いているので、あなたに紹介したいです！	Well then, you should come and eat it at my restaurant sometime! My partner, who lives with me, also works there, and I'd like to introduce you to them!	n
person 1	あら嬉しい！ぜひ、伺いたいです！わたし野球部だったせいか、結構食べるんですが、大盛りメニューなんかもありますか？	That would make me happy! I'd love to go! I eat a lot, perhaps because I used to play baseball, so do you large-sized portions as well?	y
person 2	もちろんありますよ！ぜひ自慢のハヤシライスを堪能して行ってください！わたしはグリーンピースが苦手なんですけど、あなたには彩り用にサービスしててんこもりにしますので！	Of course we do! Please come and enjoy our famous hashed beef and rice! I don't really like peas, but for you, I'll serve a heaped amount as a garnish, absolutely free!	y
