# Supplementary material
Source: ML conference proceedings conference paper supplement (https://aclanthology.org/2022.eval4nlp-1.9)
Supplement: SupplementaryMaterial [file 0094.xlsx]

## Sheet: Sheet1
person	source	translation	evaluation: is this a good translation?
person 1	こんにちは。最近調子はいかがですか？	Hello, how are you today?	y
person 2	はい、元気なんですが、安月給が悩みです。	Yes, I'm fine, but the cheap moon is in trouble.	n
person 1	お金の悩みはつきませんよね。私も最近仏門に入ったばかりなので自由になるお金はなかなか。	You don't have to worry about money. I've been in the French gates recently.	n
person 2	お坊さんてことですか！初めてお会いしました！お仕事はお忙しいんですか？	Are you busy with your first appointment?	n
person 1	そうですね。まだまだ見習いですから下働きが多いですよ。あなたはお仕事は？	Yes, I'm still a young apprentice, but you have a lot of work to do.	y
person 2	ハヤシライスが好物で、専門店でアルバイトをしているんです！ハヤシライスはお好きですか？	Do you like the rice shop?	y
person 1	好きですよー！両親と同居しているので、なかなか食卓には出てきませんが。	I'm living with my parents because they don't come out at the table very well.	n
person 2	それでしたら、いつかうちの店にも食べにいらしてください！今一緒に暮らしているパートナーも店で働いているので、あなたに紹介したいです！	Then I'd like to introduce you to one of my colleagues now if you're working with me!	n
person 1	あら嬉しい！ぜひ、伺いたいです！わたし野球部だったせいか、結構食べるんですが、大盛りメニューなんかもありますか？	Oh, I'm glad to see you too, baseball player!	n
person 2	もちろんありますよ！ぜひ自慢のハヤシライスを堪能して行ってください！わたしはグリーンピースが苦手なんですけど、あなたには彩り用にサービスしててんこもりにしますので！	Of course I'm proud of you, but I'm very proud of you to go to the Green Houndini, and I'm not proud of you!	n
