# Supplementary material
Source: ML conference proceedings conference paper supplement (https://aclanthology.org/2022.eval4nlp-1.9)
Supplement: SupplementaryMaterial [file 0095.xlsx]

## Sheet: Sheet1
person	source	translation	evaluation: is this a good translation?
person 1	あら、お久しぶりですね。お住まいはこの辺でしたっけ？	Oh hey there, long time no see. Wait, do you live around this area?	y
person 2	お久しぶりです。今姉と暮らしていて、この近くに越してきたんですよ。	Yeah, long time, no see. I moved close to here, and I'm living with my sister now.	y
person 1	そうだったんですね！わあ、嬉しい！わたしも今パートナーとこの辺りに住んでるんですよ。	I see! Yay, I'm so happy! I also live near here with my partner.	y
person 2	あら、じゃあこれから時々お会いできますね！家政婦をしているんですけれど、時間に融通がきくので、お暇なときはいつでも声を掛けてくださいな。	Oh, in that case we'll get to meet up from time to time! I work as a housekeeper, but the hours are flexible, so let me know whenever you are free.	y
person 1	ありがとうございます。ハヤシライスってお好き？このあたりに有名なお店があるので今度紹介しますよ！	Thank you. Do you like hashed beef and rice? There's a famous place for it nearby, so I could take you sometime!	y
person 2	ええ、大好きです！自分でつくる食事はメニューが偏りがちなので、楽しみです！	Yeah, I love it! When I cook for myself, I tend to make the same dishes all the time, so I'm looking forward to it!	y
person 1	そうですよね。そこのお店ね、美味しいし、内装も外国風で綺麗なのに、とっても安いのよ！安月給のわたしでも安心。	I can sympathise with that. The food is really nice at the restaurant, and it has a beautiful decor that is reminiscent of another country, but it's really cheap! Even I can afford to eat there with my low wages.	y
person 2	あら、安くて美味しくて素敵なお店なんて期待が膨らむわ！絵画なんかも飾ってあるかしら？	Oh, if it's a cheap, tasty and superb little restaurant then I can't wait! Does it have paintings on the walls as well?	y
person 1	飾ってあるわよー。美術品に興味があるの？	Yes it does; are you into artworks?	y
person 2	ええ、昔美術部に居たものですから。尊敬する画家はその頃から変わらず、ずっとゴッホなんです。	Yeah, I used to be in the art club. Ever since then, I've always loved the works of Vincent van Gogh.	y
