# Supplementary material
Source: ML conference proceedings conference paper supplement (https://aclanthology.org/2022.eval4nlp-1.9)
Supplement: SupplementaryMaterial [file 0095.xlsx]

## Sheet: Sheet1
person	source	translation	evaluation: is this a good translation?
person 1	あら、お久しぶりですね。お住まいはこの辺でしたっけ？	Oh, how long have you lived here?	y
person 2	お久しぶりです。今姉と暮らしていて、この近くに越してきたんですよ。	It's been a long time since I've lived with my sister.	n
person 1	そうだったんですね！わあ、嬉しい！わたしも今パートナーとこの辺りに住んでるんですよ。	Oh, my God, I'm living with my partner right now!	y
person 2	あら、じゃあこれから時々お会いできますね！家政婦をしているんですけれど、時間に融通がきくので、お暇なときはいつでも声を掛けてくださいな。	Well, I'll see you at any time, but if you don't mind, I'll meet my housekeeper at any time.	n
person 1	ありがとうございます。ハヤシライスってお好き？このあたりに有名なお店があるので今度紹介しますよ！	Thank you very much for introducing me to this very famous restaurant.	y
person 2	ええ、大好きです！自分でつくる食事はメニューが偏りがちなので、楽しみです！	I love the food menu, so I'll introduce myself!	n
person 1	そうですよね。そこのお店ね、美味しいし、内装も外国風で綺麗なのに、とっても安いのよ！安月給のわたしでも安心。	Yeah, well, that place is delicious, but it's so cheap in the country, I'm so cheap and cheap!	n
person 2	あら、安くて美味しくて素敵なお店なんて期待が膨らむわ！絵画なんかも飾ってあるかしら？	Oh, well, that's a good place for a nice, juicy store and a sculpture of art?	n
person 1	飾ってあるわよー。美術品に興味があるの？	Are you interested in art art?	n
person 2	ええ、昔美術部に居たものですから。尊敬する画家はその頃から変わらず、ずっとゴッホなんです。	Yeah, well, I used to be in art, so the painter's always been a Van Gogh.	n
