# Supplementary material
Source: ML conference proceedings conference paper supplement (https://aclanthology.org/2022.eval4nlp-1.9)
Supplement: SupplementaryMaterial [file 0096.xlsx]

## Sheet: Sheet1
person	source	translation	evaluation: is this a good translation?
person 1	こんにちは。最近はどんなことして過ごしていましたか？	Hello. What have you been doing lately?	y
person 2	実は最近会社を興しましてね。探偵業をやってるんです。	Actually, I've been doing a detective business lately.	y
person 1	探偵？それは珍しいお仕事を、しかもご自分で興されたなんて！なかなか大変なお仕事じゃありませんか？	It's a rare job, and it's hard work, isn't it?	y
person 2	ははは。探偵と言っても多い仕事は迷子になったペット探しなんですよ。わたしも犬を飼っているので他人事とは思えなくて。	I don't think there's much work to do as a detective, so I'm looking for someone else to help me find a dog.	y
person 1	犬の気持ちが分かって、すぐに発見してもらえそうで心強いですよ！私もウサギを飼っているのですが、万が一迷子になった時はぜひ一緒に探してください。	When I find out what it feels like to be lost with a rabbit, I'm sure I know what it feels like to have a bear!	n
person 2	はい、お任せください！そういえば、あなたはどんなお仕事をされていましたっけ？	No, no, no, no, no, no, no, no, no, no, no!	n
person 1	家政婦を長くやっています。昔から家事が大好きでして。	I've been working with my housekeeper for a long time.	n
person 2	家政婦ですか！家政婦というとどうしてもドラマのようなイメージをしてしまいますが、実際はいかがですか？	Do you really want to see the image of a housekeeper like that?	n
person 1	家政婦は見た…ですね！探偵気分を味わえそうなんですけど、実際はなかなかそういった機会にはめぐまれません。	The housekeeper looks like a detective, but it's not really an opportunity for that kind of opportunity.	n
person 2	そうなんですね！ドラマと現実が違うという点では家政婦も探偵も同じですね。	Yes, it's not like the real detective is a real detective.	n
