# Supplementary material
Source: ML conference proceedings conference paper supplement (https://aclanthology.org/2022.eval4nlp-1.9)
Supplement: SupplementaryMaterial [file 0096.xlsx]

## Sheet: Sheet1
person	source	translation	evaluation: is this a good translation?
person 1	こんにちは。最近はどんなことして過ごしていましたか？	Hello, how have you been spending your time recently?	y
person 2	実は最近会社を興しましてね。探偵業をやってるんです。	I actually started a company recently. It's a detective agency.	y
person 1	探偵？それは珍しいお仕事を、しかもご自分で興されたなんて！なかなか大変なお仕事じゃありませんか？	A detective? That's an unusual job, and yet you say you set it up yourself! Isn't that a really difficult job, though?	y
person 2	ははは。探偵と言っても多い仕事は迷子になったペット探しなんですよ。わたしも犬を飼っているので他人事とは思えなくて。	Hahaha! Well, even though I say "detective", most of my cases involve finding people's missing pets. I have a pet dog myself, so I'm unable to think of it as someone else's problem.	y
person 1	犬の気持ちが分かって、すぐに発見してもらえそうで心強いですよ！私もウサギを飼っているのですが、万が一迷子になった時はぜひ一緒に探してください。	As someone who understands a dog's feelings, people must feel reassured that you'll return their pet to them in no time! I have a pet rabbit, so if it were ever to go missing, I'd be grateful if you'd help me find it.	y
person 2	はい、お任せください！そういえば、あなたはどんなお仕事をされていましたっけ？	Okay, you can count on me! By the way, what job did you say you did again?	y
person 1	家政婦を長くやっています。昔から家事が大好きでして。	I've been a housekeeper for a long time. I've always loved doing housework.	y
person 2	家政婦ですか！家政婦というとどうしてもドラマのようなイメージをしてしまいますが、実際はいかがですか？	Oh, a housekeeper! When you say housekeeper, I can't help thinking of maids in TV shows, but what is it actually like?	y
person 1	家政婦は見た…ですね！探偵気分を味わえそうなんですけど、実際はなかなかそういった機会にはめぐまれません。	Oh you mean "What the Housemaid Saw",right?! Although it seems like you might be able to play detective, in reality, the opportunity never presents itself.	n
person 2	そうなんですね！ドラマと現実が違うという点では家政婦も探偵も同じですね。	Ah, of course! Just as TV shows and reality are different, so are housekeepers and detectives.	y
