# Supplementary material
Source: ML conference proceedings conference paper supplement (https://aclanthology.org/2022.eval4nlp-1.9)
Supplement: SupplementaryMaterial [file 0097.xlsx]

## Sheet: Sheet1
person	source	translation	evaluation: is this a good translation?
person 1	こんにちは！最近調子はどうですか？	Hello, how are you today?	y
person 2	とっても元気です！今は吹奏楽部で、部活を頑張っています！あなたのほうはどうですか？	How are you doing with the brass band now?	y
person 1	吹奏楽部ですか！素敵だなあ。私は愛犬と自由気ままに過ごしていますよ。	I've spent my whole life with the dogs	y
person 2	わたしには友だちがたくさんいるのですが、家で一人で居る時に遊んでくれるペットが居たらいいなと思うことがあるので、うらやましいです！	I've got lots of friends in my house when I'm alone I'm jealous of being a pet!	n
person 1	友達がたくさんいるなんて、そっちのほうが羨ましいですよ。そういえば、今の仕事を始めてから友達に久しくあってないなあ。	I'm glad you've got lots of friends, but you haven't started working in a long time.	y
person 2	お仕事がきっとお忙しいんですね！どんなお仕事をされているんですか？	What's your job?	y
person 1	探偵事務所をやってるんですよ。片付けが苦手で事務所は散らかり放題なんだけど、今度遊びにきてね。	I'm trying to clean up a detective's office, but my office is full of shit, so come play with me this time.	n
person 2	ええー！いいんですか？嬉しいです！わたしまだ10代なので、今のうちにいろいろな体験や経験をしてみたくって！	Oh, I'm glad you're still in love with me, because I've had a lot of experience with my kids.	n
person 1	10代！若くていいなあ！何か将来やりたいことはあるの？	Hey, are you young enough to do something about your future?	y
person 2	はい！メイクアップアーティストになるのが夢なんです！	Yes, I have a dream of becoming Mayan Albus!	y
