# Supplementary material
Source: ML conference proceedings conference paper supplement (https://aclanthology.org/2022.eval4nlp-1.9)
Supplement: SupplementaryMaterial [file 0097.xlsx]

## Sheet: Sheet1
person	source	translation	evaluation: is this a good translation?
person 1	こんにちは！最近調子はどうですか？	Hi! How've you been recently?	y
person 2	とっても元気です！今は吹奏楽部で、部活を頑張っています！あなたのほうはどうですか？	Really good! I'm in the brass band now, and I'm doing my best in the club! How about you?	y
person 1	吹奏楽部ですか！素敵だなあ。私は愛犬と自由気ままに過ごしていますよ。	Oh, the brass band? How wonderful. I'm just spending my time as I like, with my dog.	y
person 2	わたしには友だちがたくさんいるのですが、家で一人で居る時に遊んでくれるペットが居たらいいなと思うことがあるので、うらやましいです！	I'm so jealous because, even though I have a lot of friends, I sometimes think it would be nice to have a pet at home to play with at times when I'm by myself!	y
person 1	友達がたくさんいるなんて、そっちのほうが羨ましいですよ。そういえば、今の仕事を始めてから友達に久しくあってないなあ。	Well I'm jealous about the fact that you have so many friends. Come to think of it, I haven't met up with any of my friends for a long time, ever since I started my current job.	y
person 2	お仕事がきっとお忙しいんですね！どんなお仕事をされているんですか？	You must be really busy at work! What kind of job do you do?	y
person 1	探偵事務所をやってるんですよ。片付けが苦手で事務所は散らかり放題なんだけど、今度遊びにきてね。	I run a detective agency. You can come and visit sometime, although I'm not very good at tidying up, so the office is in complete disarray.	y
person 2	ええー！いいんですか？嬉しいです！わたしまだ10代なので、今のうちにいろいろな体験や経験をしてみたくって！	Wow! Can I? I'd love to! I'm still a teenager, so I want to experience various things while I can!	y
person 1	10代！若くていいなあ！何か将来やりたいことはあるの？	You're in your teens? It's nice to be young! Do you have something that you want to do when you grow up?	y
person 2	はい！メイクアップアーティストになるのが夢なんです！	Yes! It's my dream to become a makeup artist!	y
