# Supplementary material
Source: ML conference proceedings conference paper supplement (https://aclanthology.org/2022.eval4nlp-1.9)
Supplement: SupplementaryMaterial [file 0098.xlsx]

## Sheet: Sheet1
person	source	translation	evaluation: is this a good translation?
person 1	こんにちは！元気にしていましたか？	Hi, how are you?	y
person 2	はい！自衛官ですから！元気だけは自信があります。あなたは元気にしてましたか？	You're just a guard. How are you feeling?	n
person 1	はい！私も吹奏楽部員なので肺活量には自信があります！自衛官って体を鍛えたり、やっぱり大変ですか？	I'm very confident that I can train the brass band, too, because I can train myself, can't I?	n
person 2	吹奏楽部いいですね〜！自衛官は大変なこともありますが、ガッツで乗り切ってますよ！元応援団なもので！	It's hard to play the brass band, too, sir!	n
person 1	そうだったんですね！どうりでお声が通ると思いました。わたしもいつかメイクアップアーティストになりたいんですが、あなたのようにいきいきと働けたらいいなと思います。	I wish I could get through to you one day, Erda Mayhew!	n
person 2	メイクアップアーティストですか！あなたならきっとなれる！	Mayhew, you can do it now!	n
person 1	あなたの応援があれば叶う気がします！いつか夢が叶ったら、世界中を飛び回ってみたいんです！あなたにも今、叶えたいこととかありますか？	I want to jump around the world one day if you want to help me!	n
person 2	そうですね。今はとにかく目の前の仕事を責任持ってこなしたいですね。	Anyway, I want to do my job right now.	n
person 1	責任を持ってお仕事をするって、大切なことですよね。尊敬します！まだ10代ですが、将来はあなたのように責任感のある大人になりたいです！	I respect your career, but I respect your future as a child as much as you do!	n
person 2	10代ですか！今のうちにたくさんの経験をして素敵な大人になってくださいね！	You have a lot of experience now, young lady!	y
