# Supplementary material
Source: ML conference proceedings conference paper supplement (https://aclanthology.org/2022.eval4nlp-1.9)
Supplement: SupplementaryMaterial [file 0098.xlsx]

## Sheet: Sheet1
person	source	translation	evaluation: is this a good translation?
person 1	こんにちは！元気にしていましたか？	Hi! Have you been keeping well?	y
person 2	はい！自衛官ですから！元気だけは自信があります。あなたは元気にしてましたか？	Yes, because I'm an officer in the Self-Defence Force! My health is the one thing I have absolute confidence in. How about yourself?	y
person 1	はい！私も吹奏楽部員なので肺活量には自信があります！自衛官って体を鍛えたり、やっぱり大変ですか？	Yeah! I'm confident about my lung capacity because I'm in my school's wind ensemble! Is being a Self-Defense Force officer as hard as I imagine, you know, keeping fit, and stuff?	y
person 2	吹奏楽部いいですね〜！自衛官は大変なこともありますが、ガッツで乗り切ってますよ！元応援団なもので！	The wind ensemble? That's great! Being an officer in the Self-Defence Force can be difficult, but I just keep a stiff upper lip and get through it, because I used to be in the cheering squad!	y
person 1	そうだったんですね！どうりでお声が通ると思いました。わたしもいつかメイクアップアーティストになりたいんですが、あなたのようにいきいきと働けたらいいなと思います。	I see! No wonder I thought you had good enunciation. I want to be a makeup artist someday, and I hope I can work as hard as you do.	y
person 2	メイクアップアーティストですか！あなたならきっとなれる！	A makeup artist?! I believe you can do it!	y
person 1	あなたの応援があれば叶う気がします！いつか夢が叶ったら、世界中を飛び回ってみたいんです！あなたにも今、叶えたいこととかありますか？	I believe my dream will come true if I've got you supporting me! If my dream eventually does come true, I want to travel the world! Do currently have any dreams that you hope will come true?	y
person 2	そうですね。今はとにかく目の前の仕事を責任持ってこなしたいですね。	Yes. I just want to be able to take full responsibility for any task at hand.	y
person 1	責任を持ってお仕事をするって、大切なことですよね。尊敬します！まだ10代ですが、将来はあなたのように責任感のある大人になりたいです！	It's important to take responsibility for your work, isn't it. I admire you! I know I'm still a teenager, but in the future, I wanna be a responsible grown-up like you!	y
person 2	10代ですか！今のうちにたくさんの経験をして素敵な大人になってくださいね！	A teenager, huh? Well, please get lots of experience now, and grow up to be an amazing person!	y
