# Supplementary material
Source: ML conference proceedings conference paper supplement (https://aclanthology.org/2022.eval4nlp-1.9)
Supplement: SupplementaryMaterial [file 0099.xlsx]

## Sheet: Sheet1
person	source	translation	evaluation: is this a good translation?
person 1	こんにちは！お元気されてましたか？	Hi. How are you?	y
person 2	はい、最近仕事の関係で一人暮らしを始めたんですが、快適に過ごしています。あなたはどうですか？	Yes, recently, I started working on my own business, but how are you feeling?	n
person 1	一人暮らしですか！わたしは自衛隊に所属しているのですが、お互い、自分を律して暮らすのは大変ですよね！	I live with my own people, and I live in my service!	n
person 2	自衛隊員の方ですか、いつもご苦労様です。確かに自分を律して暮らすのは大変ですね。	Thank you very much for your own service, sir.	n
person 1	ええ。自分のことに責任をしっかり持って生活せねばなりませんからね。あなたは今は何をされてるんですか？	Yes, because you have to take responsibility for your own life, what are you doing now?	y
person 2	わたしは今スタイリストをしていまして、常に流行には敏感でいなくてはなと思っていますよ。	I always think I'm sensitive to the list right now.	n
person 1	それは日々勉強で大変ですな。そうだ、もうすぐ4月でわたしの誕生日なので、わたしに似合いそうなスタイルを提案してもらえませんか？	Well, that's a hard day to learn, so can you offer me a proper style in April?	n
person 2	いいですよ！一応センスが良いと人からよく言われるので、お役に立てるかと。誕生日はいつですか？	Well, when do you think you're gonna be a good person?	y
person 1	誕生日は、人に言うと、いつもからかわれるんですが、4月1日のエイプリルフールなんですよ。	My birthday is always gonna be a joke, April.	n
person 2	珍しい誕生日ですね、あまりいなそうで反対に覚えてもらえそうですね。	It's a rare birthday, so remember, don't be too rude.	n
