# Supplementary material
Source: ML conference proceedings conference paper supplement (https://aclanthology.org/2022.eval4nlp-1.9)
Supplement: SupplementaryMaterial [file 0099.xlsx]

## Sheet: Sheet1
person	source	translation	evaluation: is this a good translation?
person 1	こんにちは！お元気されてましたか？	Hi! Have you been well?	y
person 2	はい、最近仕事の関係で一人暮らしを始めたんですが、快適に過ごしています。あなたはどうですか？	Yes, I recently started living on my own due to my work, but I'm pretty comfortable. How about you?	n
person 1	一人暮らしですか！わたしは自衛隊に所属しているのですが、お互い、自分を律して暮らすのは大変ですよね！	You live on your own?! I'm a member of the Self-Defence Force, so it's hard for both us to live with good discipline!	y
person 2	自衛隊員の方ですか、いつもご苦労様です。確かに自分を律して暮らすのは大変ですね。	Oh, you're in the Self-Defence Force? Thank you for your service. It certainly is hard to discipline yourself in living.	y
person 1	ええ。自分のことに責任をしっかり持って生活せねばなりませんからね。あなたは今は何をされてるんですか？	Yeah. You have to lead a life in which you take full responsibility of your actions. What do you do currently?	y
person 2	わたしは今スタイリストをしていまして、常に流行には敏感でいなくてはなと思っていますよ。	I'm currently a stylist, so I feel I always need to be aware of trends.	y
person 1	それは日々勉強で大変ですな。そうだ、もうすぐ4月でわたしの誕生日なので、わたしに似合いそうなスタイルを提案してもらえませんか？	That must be a daily challenge to keep abreast of. Oh I know, my birthday is coming up soon in April, could you maybe suggest a style that would suit me?	y
person 2	いいですよ！一応センスが良いと人からよく言われるので、お役に立てるかと。誕生日はいつですか？	Certainly! People often say that I have good taste, so I'm at your disposal. When is your birthday?	y
person 1	誕生日は、人に言うと、いつもからかわれるんですが、4月1日のエイプリルフールなんですよ。	People always make fun of me when I tell them, but it's on April 1st, i.e. April Fool's Day.	y
person 2	珍しい誕生日ですね、あまりいなそうで反対に覚えてもらえそうですね。	That's an unusual birthday, that I don't think many people share, so on the hand, people are likely to remember it.	n
