# Supplementary material
Source: ML conference proceedings conference paper supplement (https://aclanthology.org/2022.eval4nlp-1.9)
Supplement: SupplementaryMaterial [file 0100.xlsx]

## Sheet: Sheet1
person	source	translation	evaluation: is this a good translation?
person 1	今英会話スクールに通っていて、今後スタイリストとして海外進出したいと思っています。あなたは何をされているんですか？	What do you think you're doing now in the middle of a conversation as a member of the Quorum?	n
person 2	海外進出ですか！わたしなんて、北海道で生まれ育って、いつか一度でいいから東京で暮らしたいなーなんて夢見てたのが、ちっぽけに思えちゃいます。	I want to live in Tokyo once a year and I want to learn how to live in a small sea!	n
person 1	地方から都会に出るのはなかなか大変なのはわたしも田舎出身なので分かります。今も地方から出てきて都内で一人暮らしをしていますよ。	It's hard for me to get out of the city, so I'm still living alone in the city now.	y
person 2	都内に住んでるんですね！羨ましい。東京にいたら、やっぱり合コンとかも沢山あるんでしょう？	Do you think there are a lot of people in Tokyo who are jealous of you?	y
person 1	そうですね、自分の趣味や価値観が合った人がたくさん見つかるかもしれませんね。わたしの場合、流行に敏感なんで、ファッションセンスのある人でないと合わないかもしれません。	Well, if there's a lot of people in the city who have seen their taste and fashion, then maybe I'm a little sensitive about my fashion.	n
person 2	そうかあ。彼氏いない歴イコール年齢、みたいなわたしには、東京はハードルが高いのかもしれませんね。	Well, I don't have a boyfriend, and I think Tokyo might be worth a lot of money to me.	n
person 1	もし自信が持てないのであれば、まずは見た目から変えていくのがいいかもしれませんよね。センスが良いと人からよく言われるので、ぜひ見立てさせてください。	If you don't trust me, you might want to change your mind first, because you're a good person.	n
person 2	わあ、ありがとう！普段、お年寄り相手の仕事なので、そういう華やかなことが出来るのがとっても嬉しいです。	Well, thank you very much, very much, very much.	n
person 1	お年寄り相手のお仕事ってなにか福祉関連のお仕事ですか？	What's your relationship with the old family business?	y
person 2	ええ、そうなんです。介護福祉士をしているので、お年寄りのことの相談なら、任せてくださいね。ご家族はいらっしゃる？	Yeah, well, if you'd like to talk to the old social worker, I'd like to talk to you about your family.	n
