# Supplementary material
Source: ML conference proceedings conference paper supplement (https://aclanthology.org/2022.eval4nlp-1.9)
Supplement: SupplementaryMaterial [file 0100.xlsx]

## Sheet: Sheet1
person	source	translation	evaluation: is this a good translation?
person 1	今英会話スクールに通っていて、今後スタイリストとして海外進出したいと思っています。あなたは何をされているんですか？	I'm currently attending an English language school, because in the future, I'd like to expand overseas as a stylist. What do you do?	y
person 2	海外進出ですか！わたしなんて、北海道で生まれ育って、いつか一度でいいから東京で暮らしたいなーなんて夢見てたのが、ちっぽけに思えちゃいます。	Expanding overseas?! That seems incredible to someone like me who was born and raised in Hokkaido: I dream of living in Tokyo, even if only for a short time, but my dream seems so small in comparison.	y
person 1	地方から都会に出るのはなかなか大変なのはわたしも田舎出身なので分かります。今も地方から出てきて都内で一人暮らしをしていますよ。	I understand how difficult it is to move to the big city from a rural area, because I am also from a rural area. But I still made it out of the countryside, and now I live by myself within the greater Tokyo area.	y
person 2	都内に住んでるんですね！羨ましい。東京にいたら、やっぱり合コンとかも沢山あるんでしょう？	You live in Tokyo?! I'm so jealous. I assume you go to a lot of mixer parties and other events in Tokyo, don't you?	y
person 1	そうですね、自分の趣味や価値観が合った人がたくさん見つかるかもしれませんね。わたしの場合、流行に敏感なんで、ファッションセンスのある人でないと合わないかもしれません。	That's true, you might be able to find a fair number of people whose hobbies and values match with yours. In my case, I'm aware of trends, so I might not get on with a person unless they had a keen fashion sense.	y
person 2	そうかあ。彼氏いない歴イコール年齢、みたいなわたしには、東京はハードルが高いのかもしれませんね。	I see. I think Tokyo might be a bit of a struggle for me, as I've never had a boyfriend in my life.	y
person 1	もし自信が持てないのであれば、まずは見た目から変えていくのがいいかもしれませんよね。センスが良いと人からよく言われるので、ぜひ見立てさせてください。	If you lack confidence, it might be a good idea to change your look first. People often say that I have good taste, so please let me select some outfits for you.	y
person 2	わあ、ありがとう！普段、お年寄り相手の仕事なので、そういう華やかなことが出来るのがとっても嬉しいです。	Wow, thanks! I usually deal with the elderly in my job, so I'd be very glad to have the chance to do something so glamorous.	y
person 1	お年寄り相手のお仕事ってなにか福祉関連のお仕事ですか？	When you say a job where you deal with the elderly, is it some kind of welfare-related job?	y
person 2	ええ、そうなんです。介護福祉士をしているので、お年寄りのことの相談なら、任せてくださいね。ご家族はいらっしゃる？	Yes, that's right. I'm a certified care worker, so don't hesitate to come to me if you want to discuss anything about an elderly relative. Do you have any elderly relatives?	y
