# Supplementary material
Source: ML conference proceedings conference paper supplement (https://aclanthology.org/2022.eval4nlp-1.9)
Supplement: SupplementaryMaterial [file 0101.xlsx]

## Sheet: Sheet1
person	source	translation	evaluation: is this a good translation?
person 1	こんばんは！毎日仕事と家の往復で、彼氏いない歴がすごく長くなっちゃいました。	Good evening! Everyday, I go back and forth between work and home, so I have not had a boyfriend for a very long time.	y
person 2	こんばんは。そうだったのかぁ。忙しい生活をしているんだね。	Good evening. I hear you. You must have been very busy.	y
person 1	介護福祉士なんで、夜勤とかもあって、余計なんです。あなたは付き合ってる人とか、ご家族はいらっしゃいますか？	Especially as a care worker, I work night shifts. Are you dating anyone or with your family?	y
person 2	わたしは母親と暮らしているよ。わたしが尊敬する人は母親だし、一緒に暮らしている生活を楽しんでいるよ。	I live with my mother. I respect my mom and enjoy living with her.	y
person 1	お母様と一緒なんですね。わたしも実家の一軒家に住んでるんですが、結婚して早く家を出ろって母がうるさくて。	You live with your mother. I also live in my parents' house but my mother nags me to get married and to move out.	y
person 2	そうだったのかぁ。うちとは逆だね。うちは一緒にいてほしいみたいだよ。海のそばに住んでいるんだけど、そこで海を眺めるのが好きなんだ。	I see, mine is the opposite. I think she wants me to stay with her. We live by the ocean so I love watching the water.	y
person 1	海かあ。北海道で生まれたので、わたしも海は好きですよ。でも都会に憧れたことって無いですか？	The ocean. I was born in Hokkaido so I love it, too. But have you never wanted to live in the city?	y
person 2	ないなぁ。以前、沖縄に住んでいたんだけど、今よりも良いところだった。都会は賑やかすぎて性に合わないみたいだよ。	No, not really. I used to live in Okinawa and that was nicer than here. The city is too busy, it's just not me.	y
person 1	へえ！沖縄に！わたし、沖縄にも行ったことがないな。都会にも住んだことがあるんですか？東京の町とか、知ってます？	Really! In Okinawa! I've never been to Okinawa. Have you lived in the city as well? Do you know any areas of Tokyo?	y
person 2	知ってるよ。君って意外としつこいタイプ？都会だの東京だのってうるさいなぁ。って、ごめん。怒りっぽい性格が出てしまった。	Yes, I do. You are annoying than I thought, aren't you? Going on and on about cities and Tokyo. Oops, I'm sorry, I have a short temper.	y
person 1	あ、ごめんなさい。東京のこととなると、つい熱くなっちゃうんです。こんなだから彼氏が出来ないんですよね。	Oh, I'm sorry. I get a bit carried away when it comes to Tokyo. It might be the reason why I don't have a boyfriend.	y
person 2	いや、こちらこそ失礼なことを言ってしまった。君は純真なところがあるから、きっとすぐに彼氏はできると思うよ。	Oh no, how rude of me. You are so genuine, you'll find a boyfriend soon.	y
