# Supplementary material
Source: ML conference proceedings conference paper supplement (https://aclanthology.org/2022.eval4nlp-1.9)
Supplement: SupplementaryMaterial [file 0101.xlsx]

## Sheet: Sheet1
person	source	translation	evaluation: is this a good translation?
person 1	こんばんは！毎日仕事と家の往復で、彼氏いない歴がすごく長くなっちゃいました。	Hi, there, there, there, there, there, there, there, there, there, there, there, there, there, there, back, back, back, back, back, back, back, back, back, back, back, back, back, back, back, back, back, back, back, back, back, back, back, back, back, back, back, back, back, back, back, back, back, back, back, back, back, back, back, back, back, back, back, back, back, back, back, back, back, bac…	n
person 2	こんばんは。そうだったのかぁ。忙しい生活をしているんだね。	Good evening, you have a busy life.	n
person 1	介護福祉士なんで、夜勤とかもあって、余計なんです。あなたは付き合ってる人とか、ご家族はいらっしゃいますか？	I'm a carer, and you're a caretaker, and you're not welcome to the family, are you?	n
person 2	わたしは母親と暮らしているよ。わたしが尊敬する人は母親だし、一緒に暮らしている生活を楽しんでいるよ。	I enjoy living with my mother, and I respect my life.	y
person 1	お母様と一緒なんですね。わたしも実家の一軒家に住んでるんですが、結婚して早く家を出ろって母がうるさくて。	You know, I live with my mother, too, but my mother told me to get out of my house early and get out of my house.	n
person 2	そうだったのかぁ。うちとは逆だね。うちは一緒にいてほしいみたいだよ。海のそばに住んでいるんだけど、そこで海を眺めるのが好きなんだ。	Well, I like to live by the sea with her, but I like to live by the sea with her.	n
person 1	海かあ。北海道で生まれたので、わたしも海は好きですよ。でも都会に憧れたことって無いですか？	But I was born there, and I liked the ocean, too?	n
person 2	ないなぁ。以前、沖縄に住んでいたんだけど、今よりも良いところだった。都会は賑やかすぎて性に合わないみたいだよ。	You know, I used to live in Okinawa, but the city wasn't much better than now.	n
person 1	へえ！沖縄に！わたし、沖縄にも行ったことがないな。都会にも住んだことがあるんですか？東京の町とか、知ってます？	Did you know I lived in Okinawa, too?	y
person 2	知ってるよ。君って意外としつこいタイプ？都会だの東京だのってうるさいなぁ。って、ごめん。怒りっぽい性格が出てしまった。	I know, I'm sorry, but I'm sorry, I'm sorry, I didn't mean to be an asshole in Tokyo.	n
person 1	あ、ごめんなさい。東京のこととなると、つい熱くなっちゃうんです。こんなだから彼氏が出来ないんですよね。	Oh, I'm sorry to be so excited about Tokyo, so I can't get a boyfriend like this.	n
person 2	いや、こちらこそ失礼なことを言ってしまった。君は純真なところがあるから、きっとすぐに彼氏はできると思うよ。	No, I'm sorry, but I think you're gonna be able to tell me the truth right now.	n
