# Supplementary material
Source: ML conference proceedings conference paper supplement (https://aclanthology.org/2022.eval4nlp-1.9)
Supplement: SupplementaryMaterial [file 0102.xlsx]

## Sheet: Sheet1
person	source	translation	evaluation: is this a good translation?
person 1	こんにちは。私の趣味は写真撮影なんだ。あなたは写真好きかな？	Hello. My hobby is photography. Do you like photography?	y
person 2	写真、好きよ！わたしね、顔立ちがはっきりしてるから、写真に写ると外人みたいってよく言われるの！	Yes, I do! I'm often told I look like a foreign person in photos because of my defined facial features.	y
person 1	なるほど。確かにそうだね。しかもタレントさんにもなれそうだ。実はわたし、広告代理店勤務なんだが、あなたはそういうのに興味って、ないかな？	Yes, I can see that. You could be on TV. I actually work for an advertising agency, would you be interested in something like that?	y
person 2	へえ、ちょっと興味あるかもー。あ、でも、うちの兄が厳しい人だから、反対されるかも。相談してみてから返事してもいい？	Yes, I might be a bit. I have a very strict brother, and he might not approve. May I get back to you after consulting him?	y
person 1	いいよ。お兄さんのような年長者の言うことには、耳をしっかり傾けた方が良い。昭和生まれだからか、ちょっと古い考えかもしれないけど。	Of course. It's wise to listen to your senior such as your older brother. I might sound old-fashioned as I was born in the Showa era.	y
person 2	ううん、あなたの言うこと、よく分かるわ！しっかり者の兄だから、子どもの頃から頼りっぱなしだもの。あなたはご兄弟はいるの？	Not at all, I totally understand. He is very trustworthy and I have always relied on him since I was a child. Do you have any brothers and sisters?	y
person 1	いるよ。大人数の兄弟の、わたしは上の方だけどね。青森で生まれて、自然のなかで、育ったんだ。	Yes, I do. I am one of the eldest brothers of many brothers and sisters. I was born in Aomori and we grew up in the countryside.	y
person 2	へえ、青森の自然の中で育ったのね！素敵だわ。わたし、じつは日本じゃなくて海外で生まれたから、故郷ってよく分からなくて。	Wow, you grew up in nature in Aomori. That's so nice. I was actually born outside of Japan, so it's hard to say where home is.	y
person 1	そうだったんだ？たしかに、海外で生まれているとよくわからないかもしれないね。	Is that right? It must be confusing when you are born overseas.	y
person 2	うん、そう。でも誕生日はお正月だから、ジャパニーズ文化は生まれながら身についてるつもりよ！	You might be right. But I was born on 'oshogatu' so I am quite familiar with Japanese culture.	y
person 1	お正月生まれなの？それはめでたいね！ジャパニーズ文化的に言うと、最大にめでたい日だ。	You were born on 'oshogatsu'? That's so lucky! You can say, in Japanese culture, it is the most auspicious day.	y
person 2	でしょー！顔は外国人風でも、心は立派な日本人なんだから！	I know! I might look foreign but my heart belongs to Japan!	y
