# Supplementary material
Source: ML conference proceedings conference paper supplement (https://aclanthology.org/2022.eval4nlp-1.9)
Supplement: SupplementaryMaterial [file 0102.xlsx]

## Sheet: Sheet1
person	source	translation	evaluation: is this a good translation?
person 1	こんにちは。私の趣味は写真撮影なんだ。あなたは写真好きかな？	Hello, my hobby is a photograph. Do you like it?	n
person 2	写真、好きよ！わたしね、顔立ちがはっきりしてるから、写真に写ると外人みたいってよく言われるの！	I like pictures, so I'm pretty sure I can get a picture of my face as a gringo!	n
person 1	なるほど。確かにそうだね。しかもタレントさんにもなれそうだ。実はわたし、広告代理店勤務なんだが、あなたはそういうのに興味って、ないかな？	You're absolutely right, and you don't want to be in the advertising shop, do you?	n
person 2	へえ、ちょっと興味あるかもー。あ、でも、うちの兄が厳しい人だから、反対されるかも。相談してみてから返事してもいい？	Well, maybe it's a little bit of a interest, but maybe you can talk to my brother, too?	n
person 1	いいよ。お兄さんのような年長者の言うことには、耳をしっかり傾けた方が良い。昭和生まれだからか、ちょっと古い考えかもしれないけど。	All right, maybe you should listen to your older brother, Master Shokichi Konuma	y
person 2	ううん、あなたの言うこと、よく分かるわ！しっかり者の兄だから、子どもの頃から頼りっぱなしだもの。あなたはご兄弟はいるの？	No, I know what you're saying because you've been my brother since you were a boy.	n
person 1	いるよ。大人数の兄弟の、わたしは上の方だけどね。青森で生まれて、自然のなかで、育ったんだ。	A lot of brothers grew up in the blue forest, but you've grown up in the blue forest.	n
person 2	へえ、青森の自然の中で育ったのね！素敵だわ。わたし、じつは日本じゃなくて海外で生まれたから、故郷ってよく分からなくて。	Well, I don't know, because I grew up in the blue woods, and I grew up in the blue forest, not in nature!	n
person 1	そうだったんだ？たしかに、海外で生まれているとよくわからないかもしれないね。	You don't know if they're born overseas.	y
person 2	うん、そう。でも誕生日はお正月だから、ジャパニーズ文化は生まれながら身についてるつもりよ！	Yeah, but they're going to be born in the proper moon because they're going to be a culture!	n
person 1	お正月生まれなの？それはめでたいね！ジャパニーズ文化的に言うと、最大にめでたい日だ。	Isn't that the longest day of the month?	y
person 2	でしょー！顔は外国人風でも、心は立派な日本人なんだから！	- You're a great foreigner, too!	n
