# Supplementary material
Source: ML conference proceedings conference paper supplement (https://aclanthology.org/2022.eval4nlp-1.9)
Supplement: SupplementaryMaterial [file 0103.xlsx]

## Sheet: Sheet1
person	source	translation	evaluation: is this a good translation?
person 1	ああ、もう！ダンスの練習に行ったら、友達がみんな遅刻してきたの！参っちゃう！	Oh, my friends are all late for the dance practice!	y
person 2	わかるわー。わたしも以前チアリーダーをやってたから。そういうときって本当に困るわよね。	I know, because I used to be a cheerleader too.	y
person 1	分かってくれて嬉しい！ただ、前に沖縄にいたときは、皆、もっともーっと時間にルーズだったけどね。	I'm glad to hear that, but everybody was the best time in Okinawa.	n
person 2	そうだったの？わたしは秋田で生まれたけど、秋田の人たちはそんなことなかったわ。住んでるところによって、性格って変わってくるのね。	I was born in Akasaka, but I didn't change my personality.	n
person 1	そうかも！わたしの母は、時間にとっても厳しくてね。わたし、そんな母のことをとっても尊敬してるわ。	Maybe my mother's too hard for me to believe that I'm very proud of her for time.	n
person 2	良いことね。わたし、教師をやってるんだけど、学校のそばに住んでるのよ。遅刻してくる子たちを何人も見たわ。親がしっかりしてると違うのにね。	That's a good thing, but my parents are too late to live with me.	n
person 1	へえ、教師をやってるなんて、尊敬しちゃう。子どもって、時々イラッとさせられない？わたしって短気だから、教師は絶対ムリ！	Well, you know, sometimes I respect my parents, don't you, Dr. Yeehan?	n
person 2	そうね。短気な人には難しいかもしれないわ。ところで、あなたって生まれは何年代ごろ？	Well, it may be difficult for someone, but how old are you from?	n
person 1	ん？平成生まれだけど？あなたは違うの？	Aren't you born to be raised?	n
person 2	そうよね。若いものね。わたしは70年代生まれよ。まぁまだまだ若いと自分では思ってるんだけどね。	You know, I'm 70 years old, but I still think I'm still seven years old.	n
person 1	へえー！70年代って言ったら、フォークとか流行ってた頃よね。色んな時代を見てきたからこそ、落ち着いて子どもに教えられるのかもね。	You know, when I was in the '70s, I've seen a lot of Faulk and a lot of times, so I can teach my kids to calm down.	n
person 2	そう言ってもらえると、自分に自信が出てくるわ。ありがとう。	I'm sure you'll be able to say thank you for coming out of there.	n
