# Supplementary material
Source: ML conference proceedings conference paper supplement (https://aclanthology.org/2022.eval4nlp-1.9)
Supplement: SupplementaryMaterial [file 0103.xlsx]

## Sheet: Sheet1
person	source	translation	evaluation: is this a good translation?
person 1	ああ、もう！ダンスの練習に行ったら、友達がみんな遅刻してきたの！参っちゃう！	I've had it! I went to dance class and all my friends were late! How could they...	y
person 2	わかるわー。わたしも以前チアリーダーをやってたから。そういうときって本当に困るわよね。	I get it. I use to be a cheerleader, so I understand how that's a real problem.	y
person 1	分かってくれて嬉しい！ただ、前に沖縄にいたときは、皆、もっともーっと時間にルーズだったけどね。	I'm so happy you understand! However, when I used to live in Okinawa, everyone was worse with time.	y
person 2	そうだったの？わたしは秋田で生まれたけど、秋田の人たちはそんなことなかったわ。住んでるところによって、性格って変わってくるのね。	Is that so? I was born in Akita and people in Akita are not that way. I guess, depending on where you live, your personality can change.	y
person 1	そうかも！わたしの母は、時間にとっても厳しくてね。わたし、そんな母のことをとっても尊敬してるわ。	You might be right! My mother is really strict with time. I have a lot of respect for my mom.	n
person 2	良いことね。わたし、教師をやってるんだけど、学校のそばに住んでるのよ。遅刻してくる子たちを何人も見たわ。親がしっかりしてると違うのにね。	That's a good thing. I am a teacher and live right by school. I've seen many students who are late. When the parents are firm, it makes a difference.	y
person 1	へえ、教師をやってるなんて、尊敬しちゃう。子どもって、時々イラッとさせられない？わたしって短気だから、教師は絶対ムリ！	Wow, I respect you for being a teacher. Don't kids annoy you sometimes? I'm so impatient, I could never be a teacher!	y
person 2	そうね。短気な人には難しいかもしれないわ。ところで、あなたって生まれは何年代ごろ？	True. It might be difficult for an impatient person. By the way, when were you born?	y
person 1	ん？平成生まれだけど？あなたは違うの？	Huh? I was born in the Heisei era. And you?	y
person 2	そうよね。若いものね。わたしは70年代生まれよ。まぁまだまだ若いと自分では思ってるんだけどね。	Ah, you are young. I was born in the 70s. I think I am still young though.	y
person 1	へえー！70年代って言ったら、フォークとか流行ってた頃よね。色んな時代を見てきたからこそ、落ち着いて子どもに教えられるのかもね。	Wow! In the 70s, folk songs were popular, right? You're able to teach children patiently because you've lived through so many different times.	y
person 2	そう言ってもらえると、自分に自信が出てくるわ。ありがとう。	Thank you for your words. You give me confidence.	y
