# Supplementary material
Source: ML conference proceedings conference paper supplement (https://aclanthology.org/2022.eval4nlp-1.9)
Supplement: SupplementaryMaterial [file 0104.xlsx]

## Sheet: Sheet1
person	source	translation	evaluation: is this a good translation?
person 1	こんにちは！寒いですねー！	Hello, I'm not cold!	n
person 2	ですねー！まあ、新潟生まれ、新潟育ちのわたしからすれば、このぐらいへっちゃらですよ！あなたは、寒いのはお嫌いですか？	Oh, Omodaka, you don't like this cold when you grow up?	n
person 1	嫌いではないです！なんてったって、冬生まれ！誕生日は正月ですから！	I don't want to be born in the winter!	n
person 2	まあ、ダブルでおめでたいんですね！そしたら、お正月のおせちのあとに、ケーキを食べるの？	Well, you want to celebrate the double, then eat the cake after the fair moon?	n
person 1	そうです！よくわかりましたね！でも、あれ、結構お腹いっぱいになるんですよね。正月は、本当にずっと食べてる感じですよ。兄は何もイベントがない6月生まれなので、羨ましいです。	Yes, but that's really good, because the moon is so hungry!	n
person 2	お兄様がいらっしゃるんですか。わたしには弟がいて、いつも上の兄弟が欲しかったから、羨ましいわ！	I always miss my brother June because he's always been married to me.	n
person 1	そうなんですか？兄貴って、いつもえらそうで面倒ですけどね。ちなみに、わたしは外国生まれですが、兄は日本で生まれたらしいです。本当に兄弟なのか、疑ってたりして。	Is it true that my brother was born in Japan, and I've always suspected that my brother was born to care for me?	n
person 2	まあ、なんてことを！顔立ちとかは似てないんですか？うちなんて、わたしも弟も、短足なところがソックリだから、疑いようもなく兄弟なのよ。	Well, I mean, do you really think I'm your brother, or do you think I look like my brother?	n
person 1	変なところだけど、似てるんですね！わたしのところは、わたしが見ての通り彫りの深い顔立ち、兄はうすーい顔してます。	It's strange, but I see my brother's face as deep as I do!	n
person 2	なるほどー。でもきっとどこかに共通項があるはず！そうだ！今度、わたしがやってる実家の整体院に、ご兄弟で来てくださいな。似てるところを見つけてあげる！	Well, there must be something in common, something I'm doing in my parents' house this time!	y
person 1	あはは！それは楽しそうですね！今度、兄貴を内緒で誘ってみますよ。肩が凝って大変だって言ってたから、ちょうどいいや。	Well, that sounds fun next time I asked my brother to stay out of it and ask him to stay out of it.	n
person 2	まあそうだったの。それじゃ、早めにいらしてくださいね！	Well, you should have asked him earlier!	n
