# Supplementary material
Source: ML conference proceedings conference paper supplement (https://aclanthology.org/2022.eval4nlp-1.9)
Supplement: SupplementaryMaterial [file 0104.xlsx]

## Sheet: Sheet1
person	source	translation	evaluation: is this a good translation?
person 1	こんにちは！寒いですねー！	Hello! It is cold!	y
person 2	ですねー！まあ、新潟生まれ、新潟育ちのわたしからすれば、このぐらいへっちゃらですよ！あなたは、寒いのはお嫌いですか？	Yes it is! Well, I was born and raised in Niigata, so this is nothing really. Do you not like the cold?	y
person 1	嫌いではないです！なんてったって、冬生まれ！誕生日は正月ですから！	I don't hate it! I was actually born in winter! My birthday is New Year's Day!	y
person 2	まあ、ダブルでおめでたいんですね！そしたら、お正月のおせちのあとに、ケーキを食べるの？	Well, that is double happiness! Then, do you eat cake after the New Year's Osechi?	y
person 1	そうです！よくわかりましたね！でも、あれ、結構お腹いっぱいになるんですよね。正月は、本当にずっと食べてる感じですよ。兄は何もイベントがない6月生まれなので、羨ましいです。	You are correct! How did you know? My stomach is completely full at the end of the day. It's nonstop eating on New Year's Day. I'm so jealous of my older brother who was born in June with no other events.	y
person 2	お兄様がいらっしゃるんですか。わたしには弟がいて、いつも上の兄弟が欲しかったから、羨ましいわ！	You have an older brother? I have a younger one. I've always wanted an older brother. You are so lucky!	y
person 1	そうなんですか？兄貴って、いつもえらそうで面倒ですけどね。ちなみに、わたしは外国生まれですが、兄は日本で生まれたらしいです。本当に兄弟なのか、疑ってたりして。	Really? An older brother can be bossy and a pain in the neck. I was born overseas and I think my brother was born in Japan. Who knows if we are real brother and sister?	y
person 2	まあ、なんてことを！顔立ちとかは似てないんですか？うちなんて、わたしも弟も、短足なところがソックリだから、疑いようもなく兄弟なのよ。	How could you say that? Do you not look alike? My brother and I both have very short legs. So there is no doubt we are related.	y
person 1	変なところだけど、似てるんですね！わたしのところは、わたしが見ての通り彫りの深い顔立ち、兄はうすーい顔してます。	That's so funny where you have similarities. With us, I have very defined features and my brother looks very plain.	y
person 2	なるほどー。でもきっとどこかに共通項があるはず！そうだ！今度、わたしがやってる実家の整体院に、ご兄弟で来てくださいな。似てるところを見つけてあげる！	I see. But you must have something in common. Please come with your brother to my parents' chiropractic clinic where I work next time. I will look for your similarities.	y
person 1	あはは！それは楽しそうですね！今度、兄貴を内緒で誘ってみますよ。肩が凝って大変だって言ってたから、ちょうどいいや。	Oh, my God! That sounds like fun! Next time, I'll ask him out without letting him know about that. He said he has stiff shoulders, so it's perfect.	y
person 2	まあそうだったの。それじゃ、早めにいらしてくださいね！	Well, that's that. I look forward to your visit soon!	y
