# Supplementary material
Source: ML conference proceedings conference paper supplement (https://aclanthology.org/2022.eval4nlp-1.9)
Supplement: SupplementaryMaterial [file 0105.xlsx]

## Sheet: Sheet1
person	source	translation	evaluation: is this a good translation?
person 1	こんにちは！昔、チアリーダーをやってたので、たまに身体を動かしたくて、ウズウズしてくることがあるんですよ。	Hello! I sometimes get very restless and want to move my body because I used to be a cheerleader.	y
person 2	へぇ～。すごく活動的な方なんですね。わたしは占いに興味があるくらいで、あんまり運動の方はできないんです。	Oh, my God. You must be an active person. All I'm interested in is fortune-telling so I am not very active, physically.	y
person 1	占い！面白いですよね。わたしが教えてる生徒たちも、雑誌の付録ページを見ては、いつも盛り上がってますよ！	Fortune-telling! That is so interesting. My students are always excited, reading the back pages of the magazine!	y
person 2	あはは、やっぱりそうなんだ！雑誌の付録ページは占いの定番ですもんね！ところで、教師の方だったんですか？	Oh, is that right? The appendix pages of the magazine are where you find the fortune-telling! By the way, you are a teacher?	y
person 1	ええ、そうなんです。昔はチアなんてやって弾けてましたけど、今はすっかり大人しくなって。学校の近くに住んでるので、浮いた話もないんです、ハハハ。	Yes, I am. In the past, I was very active doing cheering, but now I have completely slowed down. I live near the school, and there is no romance, hahaha.	y
person 2	わたしも、浮いた話なんてないですよ。猫を飼ってるんですが、家で猫とずーっと戯れてますもの。でも、大晦日だけは賑やかなんです。	I don't have any romantic stories to tell. I have a cat and all I do is play with my cat at home. The only excitement I have is New Year's Eve.	y
person 1	へえ、大晦日だけ？なんで？	Oh, just New Year's Eve? Why?	y
person 2	わたし、大晦日に生まれたので、みんなが誕生日会兼忘年会やってくれたり、年越し誕生日ケーキ食べたり、みんな騒ぎたい放題で、うちにやってくるんです。	I was born on New Year's Eve, so everyone comes over to our house to celebrate my birthday-year-end party. Everyone parties enjoying my New Year's birthday cake.	y
person 1	なるほど、そういうことでしたか！毎年、楽しい年越しでいいですね。わたしの実家は秋田で離れてるので、毎年は帰れないんですよ。	I see, that is why! It must be nice to have fun over the new year, every year. My family lives far away in Akita, so I don't get to go home every year.	y
person 2	そうなんですね。それは寂しいですよね。あ、良かったら、今年の大みそかは、わたしの家にいらっしゃいません？プレゼントなんて用意しなくて良いですから。	Is that so? It can be lonely. Why don't you come to my house this New Year's Eve, if you'd like? No need to bring a present.	y
person 1	まあ、ほんとに？ぜひお邪魔したいわ！あ、でも、70年代生まれのおばさんなんかが行ったら、場が白けちゃいませんかね？	Oh really? I would love that! I hope it doesn't ruin the mood if an old lady who's born in the 70s to show up to your party.	y
person 2	そんなことないですよ！わたしの誕生日って、色んな人が来てますから！もしかしたら、そこで良い出会いがあるかもしれませんし、ぜひいらしてくださいね！	Nonsense! There will be lots of different people at my birthday party! Maybe you might be lucky to meet someone nice. Please come over by all means!	y
