# Supplementary material
Source: ML conference proceedings conference paper supplement (https://aclanthology.org/2022.eval4nlp-1.9)
Supplement: SupplementaryMaterial [file 0105.xlsx]

## Sheet: Sheet1
person	source	translation	evaluation: is this a good translation?
person 1	こんにちは！昔、チアリーダーをやってたので、たまに身体を動かしたくて、ウズウズしてくることがあるんですよ。	Hello, I've been working with the cheerleaders for a long time, and sometimes I want to move on to my body.	n
person 2	へぇ～。すごく活動的な方なんですね。わたしは占いに興味があるくらいで、あんまり運動の方はできないんです。	Well, I can't be more interested in the defibrillator, so I can't be more interested in watching the news!	n
person 1	占い！面白いですよね。わたしが教えてる生徒たちも、雑誌の付録ページを見ては、いつも盛り上がってますよ！	That's funny, because we've always read the news!	n
person 2	あはは、やっぱりそうなんだ！雑誌の付録ページは占いの定番ですもんね！ところで、教師の方だったんですか？	Oh, yeah, that's right. So the magazine book was a teacher?	n
person 1	ええ、そうなんです。昔はチアなんてやって弾けてましたけど、今はすっかり大人しくなって。学校の近くに住んでるので、浮いた話もないんです、ハハハ。	Yeah, well, I can't live near the school right now, so I'm pretty close to the old school, so...	n
person 2	わたしも、浮いた話なんてないですよ。猫を飼ってるんですが、家で猫とずーっと戯れてますもの。でも、大晦日だけは賑やかなんです。	I've never heard of anything but cat and cat food at home but New Year's Eve.	n
person 1	へえ、大晦日だけ？なんで？	Well, why not just New Year's Eve?	y
person 2	わたし、大晦日に生まれたので、みんなが誕生日会兼忘年会やってくれたり、年越し誕生日ケーキ食べたり、みんな騒ぎたい放題で、うちにやってくるんです。	I was born in New Year's Eve, so everybody wants to eat a cake and come home every year!	y
person 1	なるほど、そういうことでしたか！毎年、楽しい年越しでいいですね。わたしの実家は秋田で離れてるので、毎年は帰れないんですよ。	Well, I'm happy to be home every year, because I've been happy every year!	n
person 2	そうなんですね。それは寂しいですよね。あ、良かったら、今年の大みそかは、わたしの家にいらっしゃいません？プレゼントなんて用意しなくて良いですから。	Yes, I miss that, if that's all right with you, would you like to come to my house this year?	y
person 1	まあ、ほんとに？ぜひお邪魔したいわ！あ、でも、70年代生まれのおばさんなんかが行ったら、場が白けちゃいませんかね？	Well, I'd really like to disturb you, but if your aunt went to the white house, would you like to come and see me?	n
person 2	そんなことないですよ！わたしの誕生日って、色んな人が来てますから！もしかしたら、そこで良い出会いがあるかもしれませんし、ぜひいらしてくださいね！	Well, maybe there's a lot of nice people there, because if you want to meet me, you can meet me there!	n
