# Supplementary material
Source: ML conference proceedings conference paper supplement (https://aclanthology.org/2022.eval4nlp-1.9)
Supplement: SupplementaryMaterial [file 0106.xlsx]

## Sheet: Sheet1
person	source	translation	evaluation: is this a good translation?
person 1	こんにちは。わたしは実家に住んでて、毎日、母の体をもみほぐしてるんだけど、年を取ってくるとコリって全然ほぐれないんだよね。	Hello. I live at my parents' house and I give my mother a body massage every day. When you get older, it's difficult to relax the body completely.	y
person 2	へえ、そうなんだあ。わたしのお母さんもそうなのかな。今度、肩もみ券でもプレゼントしようかな。	Oh, I didn't know that. I wonder if my mother is the same. I should offer her a shoulder massage session some time.	n
person 1	それは良い案！でも、わたし整体師なんで、もしプロの腕が借りたかったら、ぜひうちの整体院を紹介してね！	That's a good idea! I'm a chiropractor, so if you want a professional's hand, please let her know about our chiropractic clinic!	y
person 2	うん！整体師ってさ、なんか占い師の親戚みたい！わたしね、占い師になりたいんだけど、背が低くてもなれると思う？	Of course! I think a chiropractor has a lot in common with a fortune teller! I want to become a fortune teller, but do you think I can be one when I'm short?	y
person 1	占い師には身長って関係ないんじゃないかなぁ？大丈夫だと思うよ。わたしは足が短いけど、整体師。きっと、それと一緒だよ。	I don't think height makes any difference in fortune telling. I'm sure you'll be fine. I am a chiropractor but I have short legs. Same difference.	y
person 2	ほんとに！？うれしい！そういえばね、わたしの占いで、今月は乙女座は運気最悪って出たの。そしたら、今日の小学校の給食のおかず、何だったと思う？	Really!? I'm so happy to hear that! Come to think of it, my fortune for Virgo said, I will have the worst luck this month. So what do you think today's elementary school lunch dish was?	y
person 1	え？何だったの？すごくまずいもの？	Umm, what could it be? Something very yucky?	y
person 2	そうなの！ニンジンたっぷりのシチュー！最悪ー！わたし、おとめ座だから、ドンピシャだよ！	Yes! Stew with plenty of carrots! It is the worst! I am a Virgo, so there you go!	y
person 1	そうだったのかぁ。それは最悪だね。ところで、ニンジン嫌いなの？うちの弟も大人なのにニンジン嫌いなんだよ。	Sorry to hear about your bad luck. By the way, you don't like carrots? My brother who is already an adult still doesn't like carrots.	y
person 2	へえ、おんなじじゃん！ニンジン嫌いでも、弟さん、背が伸びた？	Same as me! Your brother, did he grow tall even without liking carrots?	y
person 1	いや、背じゃなくて座高が伸びたね。座高ってわかる？要するに、足が短いってこと。わたしと一緒だ。	Not so much his height but his sitting height grew. Do you know what sitting height is? It means his legs are short, like me.	y
person 2	えー！ニンジン食べないと、短足になっちゃうの？ニンジン、これからは頑張って食べることにする。。。	Oh no! Do you mean, you will get short legs if you don't eat carrots? I better start eating more carrots from now on. . .	y
