# Supplementary material
Source: ML conference proceedings conference paper supplement (https://aclanthology.org/2022.eval4nlp-1.9)
Supplement: SupplementaryMaterial [file 0106.xlsx]

## Sheet: Sheet1
person	source	translation	evaluation: is this a good translation?
person 1	こんにちは。わたしは実家に住んでて、毎日、母の体をもみほぐしてるんだけど、年を取ってくるとコリって全然ほぐれないんだよね。	Hello. I live in my mother's house every day but I don't think I'll be able to get old again.	n
person 2	へえ、そうなんだあ。わたしのお母さんもそうなのかな。今度、肩もみ券でもプレゼントしようかな。	Oh, yeah, I'll give you my mother, too.	n
person 1	それは良い案！でも、わたし整体師なんで、もしプロの腕が借りたかったら、ぜひうちの整体院を紹介してね！	But if you'd like to introduce me to my professionals, I'd like to introduce you to my professionals!	n
person 2	うん！整体師ってさ、なんか占い師の親戚みたい！わたしね、占い師になりたいんだけど、背が低くてもなれると思う？	Yeah, well, I'd like to be a sculptor, like a sculptor.	n
person 1	占い師には身長って関係ないんじゃないかなぁ？大丈夫だと思うよ。わたしは足が短いけど、整体師。きっと、それと一緒だよ。	Do you think I'm a little short with a patient?	n
person 2	ほんとに！？うれしい！そういえばね、わたしの占いで、今月は乙女座は運気最悪って出たの。そしたら、今日の小学校の給食のおかず、何だったと思う？	And I'm glad you think I didn't eat with the worst maid in the month!	n
person 1	え？何だったの？すごくまずいもの？	What's wrong with you?	y
person 2	そうなの！ニンジンたっぷりのシチュー！最悪ー！わたし、おとめ座だから、ドンピシャだよ！	Yes, I've had enough of this yesterday!	n
person 1	そうだったのかぁ。それは最悪だね。ところで、ニンジン嫌いなの？うちの弟も大人なのにニンジン嫌いなんだよ。	Oh, yeah, well, I hate carrots, so I don't like carrots too?	n
person 2	へえ、おんなじじゃん！ニンジン嫌いでも、弟さん、背が伸びた？	You don't like carrots, brother?	n
person 1	いや、背じゃなくて座高が伸びたね。座高ってわかる？要するに、足が短いってこと。わたしと一緒だ。	No, no, no, no, no, no, no, no, no, no, no, no, no, no, no, no, no, no, no, no, no, no, no, no, no, no, no, no, no, no, no, no, no, no, no, no, no, no, no, no, no, no, no, no, no, no, no, no, no, no, no, no, no, no, no, no, no, no, no, no, no, no, no, no, no, no, no, no, no, no, no, no, no, no, no, no, no, no, no, no, no, no, no, no, no, no, no, no, no, no, no, no, no, no, no, no, no, no, no, no.	n
person 2	えー！ニンジン食べないと、短足になっちゃうの？ニンジン、これからは頑張って食べることにする。。。		n
