# Supplementary material
Source: ML conference proceedings conference paper supplement (https://aclanthology.org/2022.eval4nlp-1.9)
Supplement: SupplementaryMaterial [file 0107.xlsx]

## Sheet: Sheet1
person	source	translation	evaluation: is this a good translation?
person 1	いやあ、正月早々、冷えますねー。うちの飼い猫なんて、コタツから一切、出てきやしません！	Well, there's no cold cats coming out of my place!	n
person 2	わかります～。本当に寒いですもんね。わたしも。大きいお尻をすっぽりとコタツに入れて、みじんも動きたくないですもの。	I really don't want to move too cold, and I don't want to move too big.	n
person 1	分かります、分かります。12月生まれのわたしですら、この寒さは身に堪えますから。あなたは、何月生まれですか？	I know, but even after December's birth, how long have you been born in this cold?	n
person 2	わたしは3月生まれよ。実は今、もうすぐ子供が生まれるから、産休中なの。この子もあなたと同じ、冬生まれね。	I was born in March, and now she's born, just like you, from now on, from now on, from now on, in winter.	n
person 1	わあ、それは楽しみですねえ。産休中ってことは、お仕事は何かされてたんですか？	Well, it's not fun, is it?	n
person 2	仕事はホテルのフロント係をしていたわ。趣味で外国語の勉強をしていたんだけど、それが生かせる仕事がしたくって。	I've been studying at the hotel shop, but I've been studying it for years.	n
person 1	なるほどー。趣味が活かせるなんて、天職といっても過言ではないですな。もしかして、あなた、今は運気的に絶好調かもしれませんよ。	Well, I don't think you're too good to be able to use your hobby right now.	n
person 2	そうなんですかね～？それだと嬉しいんだけど。	Are you sure about that?	y
person 1	ええ、詳しく知りたければ、生年月日を教えてくれれば、占ってあげますよ。わたしね、占いに興味があって、占い学校に行こうかと思ってるんです。	Yeah, well, if you want to know more about it, I'll read it to you at school	n
person 2	そうなんですか！？それはぜひ占ってほしいわ！	Do you want me to read it?	n
person 1	あ、でも、血液型占いってのは、あんまり当たらないから信じないほうがいいです！わたし、A型だけど全然几帳面じゃないですから。	But the blood fischer isn't too trusting, so I'm not quite impressed!	n
person 2	それ、わかるわ～。わたしの夫は、B型だけど、几帳面なの。全然参考にならないのよね。	You know, it's not my husband, but it's not him.	n
