# Supplementary material
Source: ML conference proceedings conference paper supplement (https://aclanthology.org/2022.eval4nlp-1.9)
Supplement: SupplementaryMaterial [file 0107.xlsx]

## Sheet: Sheet1
person	source	translation	evaluation: is this a good translation?
person 1	いやあ、正月早々、冷えますねー。うちの飼い猫なんて、コタツから一切、出てきやしません！	Don't you think it's been so cold since New Year's Day. My cat doesn't come out from the heated kotatsu table at all!	y
person 2	わかります～。本当に寒いですもんね。わたしも。大きいお尻をすっぽりとコタツに入れて、みじんも動きたくないですもの。	I can sympathize. It's been really cold. I am the same way. I have my big bottom snug inside the kotatsu and don't want to move at all.	y
person 1	分かります、分かります。12月生まれのわたしですら、この寒さは身に堪えますから。あなたは、何月生まれですか？	I know, I know. Even though I am a December baby, I can't stand this cold. What month were you born?	y
person 2	わたしは3月生まれよ。実は今、もうすぐ子供が生まれるから、産休中なの。この子もあなたと同じ、冬生まれね。	I was born in March. Actually, I'm on maternity leave because I am expecting soon. My child will be born in winter, like you.	y
person 1	わあ、それは楽しみですねえ。産休中ってことは、お仕事は何かされてたんですか？	Wow, that's very exciting! What kind of work were you doing before being on maternity leave?	y
person 2	仕事はホテルのフロント係をしていたわ。趣味で外国語の勉強をしていたんだけど、それが生かせる仕事がしたくって。	I was in charge of the front desk of a hotel. I was studying foreign languages as a hobby, so I wanted to work where I could use my skills.	y
person 1	なるほどー。趣味が活かせるなんて、天職といっても過言ではないですな。もしかして、あなた、今は運気的に絶好調かもしれませんよ。	I see. It is not an exaggeration to say that it's your calling to make use of your hobbies. You may be in a very lucky phase right now.	y
person 2	そうなんですかね～？それだと嬉しいんだけど。	Is that right? I am happy if that's true.	y
person 1	ええ、詳しく知りたければ、生年月日を教えてくれれば、占ってあげますよ。わたしね、占いに興味があって、占い学校に行こうかと思ってるんです。	If you would like to know more, let me know your date of birth, I can read your fortune. I'm interested in fortune-telling, and I'm thinking of going to a fortune-telling school.	y
person 2	そうなんですか！？それはぜひ占ってほしいわ！	Is that right!? I would love for you to read my fortune!	y
person 1	あ、でも、血液型占いってのは、あんまり当たらないから信じないほうがいいです！わたし、A型だけど全然几帳面じゃないですから。	Oh, forget about blood type divination because it's not worth your while! I am a blood type A, but I'm not at all meticulous.	y
person 2	それ、わかるわ～。わたしの夫は、B型だけど、几帳面なの。全然参考にならないのよね。	I understand that. My husband is a Type B, but he is very organized. It's not helpful at all.	y
