# Supplementary material
Source: ML conference proceedings conference paper supplement (https://aclanthology.org/2022.eval4nlp-1.9)
Supplement: SupplementaryMaterial [file 0108.xlsx]

## Sheet: Sheet1
person	source	translation	evaluation: is this a good translation?
person 1	こんにちは。わたし、小学校でチビ！チビ！って、いじめられてるんだ。	Hi, I'm a little bugger in elementary school!	n
person 2	ええっ！それは傷つくね。大丈夫？	Oh, that hurts, okay?	y
person 1	うん。大丈夫！いつか見返してやるって思って、頑張ってるから。あなたはどんな人？	Yeah, well, I'm going to take a look at it one day, so how many people are you?	n
person 2	えらいね！わたしは、仕事を定年してノンビリ暮らしてる老人の一人だよ。毎日釣りばっかりしてるねえ。釣りには興味あるかい？	I'm one of the old men who lives here every day.	n
person 1	釣りって、魚を釣るんだよね？あれって、楽しいの？	That's fun for fish, right?	n
person 2	楽しいよ。まあ、待つ時間も色々考え事ができるしね。ただ、わたしみたいに休日釣りばっかりで、嫁さんについに愛想をつかされちまったタイプもいるけどさ。	Well, we can wait a lot of time to think about it, just like I was getting married, just like you and me, you know?	n
person 1	そうだったんだ。じゃぁ、わたしと一緒で一人ぼっち？	So you were alone with me?	n
person 2	うーん、たしかにそうなんだけど、一人ぼっちって響きは好きじゃないな。一匹狼って言ったほうが良いんじゃないかな？	Well, I'm sure you don't like the sound of a single loner, do you?	n
person 1	一匹狼かぁ！それ、かっこいいね！わたしも今度から、そう言おう！ところで、わたし、ニンジンが嫌いなんだけど、あなたは嫌いなものってある？	I'll tell you one thing, I don't like carrots anymore!	n
person 2	嫌いなものは、虫歯だね！しっかり歯磨きしてきたから、この年になっても虫歯が一本もないんだよ。	I don't like my teeth anymore!	n
person 1	すごーい！虫歯って、歯医者さんに行かないといけないから大変だもんね。わたし、朝の占いで、乙女座のラッキーアイテムは歯ブラシだったから、帰ったらわたしも磨こうっと。	Wow, I had to go to the dentist's funeral, because I had to go to my grandmother's hairbrush, and I had to go to the dentist's garage in the morning!	n
person 2	うんうん、素直で可愛いね。その素直さがあればきっといつか、友達ができるよ！	Yeah, well, I'll be honest with you when my friends get back, and I'll be pretty.	n
