# Supplementary material
Source: ML conference proceedings conference paper supplement (https://aclanthology.org/2022.eval4nlp-1.9)
Supplement: SupplementaryMaterial [file 0108.xlsx]

## Sheet: Sheet1
person	source	translation	evaluation: is this a good translation?
person 1	こんにちは。わたし、小学校でチビ！チビ！って、いじめられてるんだ。	Hello. I'm in elementary school. At school everyone bullies me, calling me a midget!	y
person 2	ええっ！それは傷つくね。大丈夫？	What?! That must be hard. Are you okay?	y
person 1	うん。大丈夫！いつか見返してやるって思って、頑張ってるから。あなたはどんな人？	Yeah, I'm good. I'm trying hard to show those kids one day. Tell me about yourself.	y
person 2	えらいね！わたしは、仕事を定年してノンビリ暮らしてる老人の一人だよ。毎日釣りばっかりしてるねえ。釣りには興味あるかい？	You're a good kid! I am an old retired man and living quietly. I go fishing every day. Are you interested in fishing?	y
person 1	釣りって、魚を釣るんだよね？あれって、楽しいの？	Fishing, you mean you catch fish? Is that fun?	y
person 2	楽しいよ。まあ、待つ時間も色々考え事ができるしね。ただ、わたしみたいに休日釣りばっかりで、嫁さんについに愛想をつかされちまったタイプもいるけどさ。	It's fun. There's a lot to think about while you wait. Although my wife got fed up and left me because I went fishing on every holiday.	y
person 1	そうだったんだ。じゃぁ、わたしと一緒で一人ぼっち？	Oh no, is that so? Then are you lonely like me?	y
person 2	うーん、たしかにそうなんだけど、一人ぼっちって響きは好きじゃないな。一匹狼って言ったほうが良いんじゃないかな？	Well, I am alone, but I don't like the sound of that. Don't you think it sounds better if you say I am a lone wolf?	y
person 1	一匹狼かぁ！それ、かっこいいね！わたしも今度から、そう言おう！ところで、わたし、ニンジンが嫌いなんだけど、あなたは嫌いなものってある？	A lone wolf! That's cool! I'll call myself that, too! By the way, I don't like carrots. Do you have anything you don't like?	y
person 2	嫌いなものは、虫歯だね！しっかり歯磨きしてきたから、この年になっても虫歯が一本もないんだよ。	What I don't like is tooth decay! I've brushed my teeth really well, so even at my age, I don't have any cavities.	y
person 1	すごーい！虫歯って、歯医者さんに行かないといけないから大変だもんね。わたし、朝の占いで、乙女座のラッキーアイテムは歯ブラシだったから、帰ったらわたしも磨こうっと。	That's amazing! Going to the dentist to get your teeth fixed is so hard. I read that the lucky item for Virgo is a toothbrush this morning, so I will go brush my teeth when I get home.	y
person 2	うんうん、素直で可愛いね。その素直さがあればきっといつか、友達ができるよ！	You are honest and sweet. Therefore, you should have no problem making friends in time!	y
