# Supplementary material
Source: ML conference proceedings conference paper supplement (https://aclanthology.org/2022.eval4nlp-1.9)
Supplement: SupplementaryMaterial [file 0109.xlsx]

## Sheet: Sheet1
person	source	translation	evaluation: is this a good translation?
person 1	ねえねえ、お尻が大きい人って、安産型っていうけど、あれって本当の話？	Hey, that's what people say about their big fat ass, isn't it?	n
person 2	どうなんだろう？でも、お尻が大きいってマイナスに見られがちだから、安産くらいのプラスが欲しいよね～。	What do you think? But I want to see the size of their ass as much as they can see in their big fat ass.	n
person 1	そうだよね。わたし、今産休中なんだけど、安産で済むように祈ってるんだ。そうじゃなきゃ、ずっと大きいお尻で生きてきたメリットないもん！	Yeah, well, I'm still praying for my health, but I've been living on a big fat ass for a long time!	n
person 2	そうなんだ～！じゃぁわたしも安産で生まれてくるように願ってるよ！それで、生まれたら、お腹のマッサージしてあげる！	And I hope you're not hungry, because I'm born as a massage massage!	n
person 1	お腹のマッサージ？それって、早く元のお腹のサイズに戻れるのかな？	Are you hungry, or are you gonna go back to your massage?	n
person 2	うん！やるとやらないでは、全然違うんだから！わたしエステティシャンとして、女性のお腹をきれいに整えまくってきたんだから、そこは任せてよ～。	Don't do this because I'm not like Estelle, because I'm a beautiful woman, and I'm not like her, so I'm going to be able to keep my stomach clean, so I'm going to pay for this now!	n
person 1	エステの人なんだ！すごい、そんな人にお願いできるなんて、今から生むのが楽しみになってきたよ！産休が終わったら、前よりもきれいになったって職場で言われるかも！	You're the best person I've ever had to ask you to be a man before the baby is over!	n
person 2	うんうん、期待してて！でもね、ネイリストになりたいっていう夢も捨てきれなくって、そっちの勉強もしてるんだよね。	Yeah, but you might want to learn more about it than your dreams, Nathan.	y
person 1	すごいね、ほかにも夢があるんだね。わたしも趣味の韓国語の勉強をいかして、その先に夢を見つけてみようかな！	Well, there's another dream, and I'm gonna study Korean and find a dream!	y
person 2	良いと思う！やっぱり夢は持ち続けなきゃ！岩手県で生まれて都会にやってきて、熱帯魚を飼いながら一人暮らし。わたしなんて、ずっと夢追ってるんだから。	I think it's a good dream, because I've been living in a city where I've been born and I've been living alone since I was born in a single city with a burning fish!	n
person 1	えらいよー。そうだな、生まれてきたこの子をK-POPアイドルにするとかは？ああ、でも駄目！わたしも旦那も純和風な顔だから！	- Oh, but I've been born to the wife and child's face all the time!	n
person 2	良いじゃん！純和風な顔のK-POPアイドルだって、きっと流行るって！お互い、頑張ろうよ！	- Let's do the same thing!	n
