# Supplementary material
Source: ML conference proceedings conference paper supplement (https://aclanthology.org/2022.eval4nlp-1.9)
Supplement: SupplementaryMaterial [file 0109.xlsx]

## Sheet: Sheet1
person	source	translation	evaluation: is this a good translation?
person 1	ねえねえ、お尻が大きい人って、安産型っていうけど、あれって本当の話？	Hey. You hear people with big hips are said to have an easy delivery. Do you think that's true?	y
person 2	どうなんだろう？でも、お尻が大きいってマイナスに見られがちだから、安産くらいのプラスが欲しいよね～。	I don't know. Having a big butt tends to be seen as a negative so having a positive aspect like an easier delivery would be a good thing.	y
person 1	そうだよね。わたし、今産休中なんだけど、安産で済むように祈ってるんだ。そうじゃなきゃ、ずっと大きいお尻で生きてきたメリットないもん！	Yes, you're right. I'm on maternity leave right now, and I am praying for a safe delivery. Otherwise, what was the point in having a big butt all my life!	y
person 2	そうなんだ～！じゃぁわたしも安産で生まれてくるように願ってるよ！それで、生まれたら、お腹のマッサージしてあげる！	That's right! I will be praying for your safe delivery! And when you're done, I can give you a stomach massage!	y
person 1	お腹のマッサージ？それって、早く元のお腹のサイズに戻れるのかな？	A belly massage? Would that get me back to my original waist size?	y
person 2	うん！やるとやらないでは、全然違うんだから！わたしエステティシャンとして、女性のお腹をきれいに整えまくってきたんだから、そこは任せてよ～。	Yes! It will be completely different, with or without treatment! As an esthetician, I've been working on women's waistlines, so you can trust me.	y
person 1	エステの人なんだ！すごい、そんな人にお願いできるなんて、今から生むのが楽しみになってきたよ！産休が終わったら、前よりもきれいになったって職場で言われるかも！	You're an esthetician! Wow, there's something to look forward to after the birth if you can work on me! After my maternity leave, I might be told I look better when I get back at work!	y
person 2	うんうん、期待してて！でもね、ネイリストになりたいっていう夢も捨てきれなくって、そっちの勉強もしてるんだよね。	Yes, you can count on me! But I can't let go of my dream to become a manicurist so I am also studying for that.	y
person 1	すごいね、ほかにも夢があるんだね。わたしも趣味の韓国語の勉強をいかして、その先に夢を見つけてみようかな！	That's amazing, you have another dream. I should find a dream using my skills from hobby which is studying Korean!	y
person 2	良いと思う！やっぱり夢は持ち続けなきゃ！岩手県で生まれて都会にやってきて、熱帯魚を飼いながら一人暮らし。わたしなんて、ずっと夢追ってるんだから。	That sounds great! It's important to keep on dreaming! I was born in Iwate Prefecture and came to the city, and am living alone with my tropical fish. I have been going after my dreams.	y
person 1	えらいよー。そうだな、生まれてきたこの子をK-POPアイドルにするとかは？ああ、でも駄目！わたしも旦那も純和風な顔だから！	That's great. Maybe I will make my baby a K-POP idol? Oh no, that won't do. Both my husband and I have typical Japanese faces!	y
person 2	良いじゃん！純和風な顔のK-POPアイドルだって、きっと流行るって！お互い、頑張ろうよ！	That's good! You never know if a K-pop idol with Japanese features will become popular! Let's do our best!	y
