# Supplementary material
Source: ML conference proceedings conference paper supplement (https://aclanthology.org/2022.eval4nlp-1.9)
Supplement: SupplementaryMaterial [file 0110.xlsx]

## Sheet: Sheet1
person	source	translation	evaluation: is this a good translation?
person 1	やぁ、こんにちは。今日は釣り日和だね。	Hello, hello. It's a fishing day.	y
person 2	そうだね！あんまりにも気持ちが良い気温だから、今朝なんて、陸上部の朝練に寝坊しちゃったよ。	Yeah, well, it's a pretty good temperature, so I overslept the whole morning.	n
person 1	陸上部なのかい？元気が良いねぇ。わたしは、定年退職して、妻とは熟年離婚。はぁ、最近は釣りだけが生きる気力だよ。	How's my wife and I been getting married for years?	n
person 2	えー、熟年離婚はヤバいね！奥さんになんで愛想をつかされちゃったの？	Why did your wife get so tired of getting married?	n
person 1	髪の毛が薄いからかな？いや、まさかね。	You don't have any hair, do you?	y
person 2	まさかー！うちのばあちゃんなんて、つるつる頭のじいちゃんのこと、未だに好きみたいだよ。	- No, I still love my grandmother's head.	n
person 1	ラブラブなご夫婦で良いなぁ。本当に羨ましいよ。わたしは虫歯が一本もないくらい健康なのに、本当にどうして。残念だ。	How can I be so lucky if I'm not so lucky with one of my teeth?	n
person 2	そうだねえ。でもさ、よく考えたら、つるつる頭のじいちゃんラブなばあちゃんが、わたしのことを溺愛してるってことは、わたしってじいちゃん似？将来ハゲ？	Yeah, but if you think about it, my grandfather would drown me in love with my head, wouldn't he?	n
person 1	そうかもしれない。薄毛は遺伝するらしいよ。うちの息子も、そういえば最近薄くなってきたな。	No, his son would have been bald-headed lately, too.	n
person 2	やめてよ－！将来有望な高校生の心を折っても、なにも良いこと無いよ！	No, no, no, no, no, no, no, no, no, no, no, no!	n
person 1	はっはっはっ！冗談だよ！大丈夫、君はわたしみたいに暗い性格ではなさそうだから、きっとストレスも溜まらずに禿げんだろう。	I'm kidding, you're a dark, dark personality like me, so I'm sure you'll be all right with your stress.	n
person 2	うーん、信じて良いのかな？それよりも、苦手なピーマンを食べれるようになったほうが、案外、髪の毛に良いかもしれない！	Well, maybe you should have trusted Peman's hair better than eating out of your hair!	n
