# Supplementary material
Source: ML conference proceedings conference paper supplement (https://aclanthology.org/2022.eval4nlp-1.9)
Supplement: SupplementaryMaterial [file 0110.xlsx]

## Sheet: Sheet1
person	source	translation	evaluation: is this a good translation?
person 1	やぁ、こんにちは。今日は釣り日和だね。	Hello there. It's a perfect day to go fishing today.	y
person 2	そうだね！あんまりにも気持ちが良い気温だから、今朝なんて、陸上部の朝練に寝坊しちゃったよ。	Ah yes! As it was so pleasant this morning, I overslept for my morning track practice.	y
person 1	陸上部なのかい？元気が良いねぇ。わたしは、定年退職して、妻とは熟年離婚。はぁ、最近は釣りだけが生きる気力だよ。	Are you in the track and field club? You must be fit. I am retired, and divorced in middle age. Fishing is about the only thing I live for these days.	y
person 2	えー、熟年離婚はヤバいね！奥さんになんで愛想をつかされちゃったの？	It must be tough, divorced at your age! Why did your wife leave you?	y
person 1	髪の毛が薄いからかな？いや、まさかね。	Maybe because of my thinning hair? No, that can't be…	y
person 2	まさかー！うちのばあちゃんなんて、つるつる頭のじいちゃんのこと、未だに好きみたいだよ。	No way! My grandma still seems to love grandpa who is completely bald.	y
person 1	ラブラブなご夫婦で良いなぁ。本当に羨ましいよ。わたしは虫歯が一本もないくらい健康なのに、本当にどうして。残念だ。	That's nice that they are a lovely couple. I really envy them. I am healthy with no cavities, so why? Such bad luck.	y
person 2	そうだねえ。でもさ、よく考えたら、つるつる頭のじいちゃんラブなばあちゃんが、わたしのことを溺愛してるってことは、わたしってじいちゃん似？将来ハゲ？	Well, come to think of it, if my grandma loves my balding grandpa, and she also adores me, does that mean I look like my grandpa? Am I going to be bald?	y
person 1	そうかもしれない。薄毛は遺伝するらしいよ。うちの息子も、そういえば最近薄くなってきたな。	That can be. Thinning hair is hereditary. I think my son's hair is thinning recently.	y
person 2	やめてよ－！将来有望な高校生の心を折っても、なにも良いこと無いよ！	No, don't say that! There is nothing good about breaking the heart of a promising high school student!	y
person 1	はっはっはっ！冗談だよ！大丈夫、君はわたしみたいに暗い性格ではなさそうだから、きっとストレスも溜まらずに禿げんだろう。	Ha ha Ha, I'm only joking! You'll be fine. You don't seem to be negative like me, so I'm sure you won't stress out and go bald.	y
person 2	うーん、信じて良いのかな？それよりも、苦手なピーマンを食べれるようになったほうが、案外、髪の毛に良いかもしれない！	Hmm, are you sure? Instead, it might be better if I can start eating my least favourite peppers for my hair!	y
