# Supplementary material
Source: ML conference proceedings conference paper supplement (https://aclanthology.org/2022.eval4nlp-1.9)
Supplement: SupplementaryMaterial [file 0111.xlsx]

## Sheet: Sheet1
person	source	translation	evaluation: is this a good translation?
person 1	ねえ、知ってる？イーハトーブって岩手のことらしいよ！	Hey, did you know ... "Ihatov" is another name for Iwate!	y
person 2	そうなんだ！？岩手って、イーハトーブって言うの！？じゃぁわたしの生まれた山形は、ヤーマガータ？	Really!? Iwate is called Ihatov!? Then, is Yamagata where I was born Yaa-ma-gaa-ta?	y
person 1	あはは！そうかもー！宮沢賢治の本が好きで、いろいろ調べてたの。宮沢賢治の生まれ故郷が岩手らしいんだ。	Ha ha Ha! That may be! I like Kenji Miyazawa's books and I was doing some research. I found out Kenji Miyazawa's hometown is Iwate.	y
person 2	へ～、物知り～！わたしみたいなコンビニの店員にはもったいないくらいの雑学じゃん！	Wow, you're knowledgeable! It's a waste of trivia for a convenience store clerk like me!	y
person 1	雑学っていうなー！宮沢賢治の描く理想郷、イーハトーブが岩手だなんて、岩手生まれの私には誇りだよ！岩手に行ったことある？	It's not just trivial knowledge! I'm proud to be born in Iwate, where Kenji Miyazawa wrote a book about a utopian city called Ihatov, which is Iwate! Have you ever been to Iwate?	y
person 2	あるよ～！だって、山形と岩手って近いじゃん？わたし、暑さが苦手だから、岩手の小岩井農場に涼みに行ったことあるの。	Yes, I have! Yamagata and Iwate are quite close, right? I'm not good with the heat, and I went to the Koiwai Farm in Iwate to cool off.	y
person 1	涼みに来たんだ？なんか自分の故郷を褒めらてるみたいで嬉しい！でも、わたしは寒いのが嫌で、南国にあこがれてるんだ！	You were there to cool off? I feel proud that you are praising my hometown! I actually don't like the cold, so I long for the tropical weather!	y
person 2	そうなんだ？まぁ暑すぎるのも寒すぎるのも、考えものだもんね～。ところでさ、漫画読むのって好き？私は好き！	I see. It's a worry for it to be too hot or too cold. By the way, do you like reading comic books? I like to!	y
person 1	わたし、漫画はあんまり読まないなあ。南国を思いながら、飼ってる熱帯魚を眺めてる時間が好きなの。	I don't read manga very much. I like spending time looking at my tropical fish and dreaming about the tropical islands.	y
person 2	え？熱帯魚飼ってるの！？あれって、きれいだよね！わたし、ファッションデザイナーになりたい！っていう夢があるんだけど、熱帯魚のデザインってよく参考にするんだよね。	Oh wow, you have tropical fish!? They must be beautiful. I have a dream of becoming a fashion designer and I often refer to the patterns of tropical fish.	y
