# Supplementary material
Source: ML conference proceedings conference paper supplement (https://aclanthology.org/2022.eval4nlp-1.9)
Supplement: SupplementaryMaterial [file 0111.xlsx]

## Sheet: Sheet1
person	source	translation	evaluation: is this a good translation?
person 1	ねえ、知ってる？イーハトーブって岩手のことらしいよ！	Hey, you know, the power of the rock?	n
person 2	そうなんだ！？岩手って、イーハトーブって言うの！？じゃぁわたしの生まれた山形は、ヤーマガータ？	Is it true that I was born in the mountains of Imp?	n
person 1	あはは！そうかもー！宮沢賢治の本が好きで、いろいろ調べてたの。宮沢賢治の生まれ故郷が岩手らしいんだ。	He seems to like a lot of clever books in the house of Okinawa!	n
person 2	へ～、物知り～！わたしみたいなコンビニの店員にはもったいないくらいの雑学じゃん！	You know what I'm doing in my shop?	n
person 1	雑学っていうなー！宮沢賢治の描く理想郷、イーハトーブが岩手だなんて、岩手生まれの私には誇りだよ！岩手に行ったことある？	I'm so proud to have a hand in Iwamoto, you know?	n
person 2	あるよ～！だって、山形と岩手って近いじゃん？わたし、暑さが苦手だから、岩手の小岩井農場に涼みに行ったことあるの。	Because I'm not too hot with the mountains and the rock, so I went to Iwamoto's farm to cool down!	n
person 1	涼みに来たんだ？なんか自分の故郷を褒めらてるみたいで嬉しい！でも、わたしは寒いのが嫌で、南国にあこがれてるんだ！	I'm so glad you're here to cool your own home, but I don't like it in the South!	n
person 2	そうなんだ？まぁ暑すぎるのも寒すぎるのも、考えものだもんね～。ところでさ、漫画読むのって好き？私は好き！	Well, I like it too much to read, too, do I?	n
person 1	わたし、漫画はあんまり読まないなあ。南国を思いながら、飼ってる熱帯魚を眺めてる時間が好きなの。	I don't think I have time to read the comic books, so I don't have time to read the Northerners.	n
person 2	え？熱帯魚飼ってるの！？あれって、きれいだよね！わたし、ファッションデザイナーになりたい！っていう夢があるんだけど、熱帯魚のデザインってよく参考にするんだよね。	I want to be a fashion designer, you know?	n
