# Supplementary material
Source: ML conference proceedings conference paper supplement (https://aclanthology.org/2022.eval4nlp-1.9)
Supplement: SupplementaryMaterial [file 0112.xlsx]

## Sheet: Sheet1
person	source	translation	evaluation: is this a good translation?
person 1	おはようございまーす。あ～、ねむ。わたし、早起き苦手なんだよね～。	Good morning. So sleepy. You know, I really cannot get up early in the morning.	y
person 2	あら、そうなんだ。低血圧とかなの？	Is that right? Do you have low blood pressure?	y
person 1	なんなんだろねー？ピーマン嫌いだから、食べないと低血圧になるとか？	What is that? I hate peppers, so if you don't eat them, do you get low blood pressure or something?	y
person 2	なにそれー！わたしはCAやってるから、時差ボケ関係なく、どんな時刻でもピタッと起きれるよ。職業病かな？	What's that! I'm a CA, so I can get up at any time, regardless of jet lag. It must be a work related thing.	y
person 1	すご！そのスキル、わたしもほしい！！高校でも、朝練の時間とか、テスト勉強の時間とか、役に立ちそう！	That's amazing! I wish I had that skill, too!! It must have come in handy in high school, like for morning trainings or during exams!	y
person 2	ああ、テスト勉強をしなきゃって思ったら、わたしでも寝坊するかも！わたしが寝坊しないのは、密かに好きなパイロットが居るからかも！	Oh, if I had to study for a test, I might oversleep! Maybe the reason why I don't oversleep is because there is a pilot I fancy!	y
person 1	え？そうなのー？そんなオチなのかぁ。じゃぁわたしも、密かに好きなもの作ったら起きられるかな？	Oh so that's the catch, huh? So, if I can find something that I secretly like, do you think I can wake up?	y
person 2	きっとそうだよ！わたしなんて、いつも夢の中でその人と夫婦になって、幸せな気分で目覚めるの。これって、わたしがいい夫婦の日に生まれたからかな？	I'm sure you can! I always wake up in a good mood, because I wake up from a dream of being married to the person. It might be because I was born on a 'Good Couple's Day'?	y
person 1	そんな夢見てるのー？すごくない？わたしなんて、陸上部で延々走ってる夢くらいしか見ないのに～。	How do you dream like that? That's wild. I only dream about running endlessly in the track and fields club.	y
person 2	それ、寝ても疲れがトレなさそうだね！たまには、映画とか見て頭をリセットしたほうが良いんじゃない？映画好きのわたしから、何かオススメしようか？	Sounds like you won't be well rested even after sleep! You might want to reset your mind by watching a movie, some times. I love movies, so would you like me to recommend something for you?	y
person 1	あ、それ良いかも！わたし、おばあちゃん子だからさ、おばあちゃんに関するような映画ない？あったら、絶対リセットするために観るんだけど。	Oh, that might be a good idea! I'm very close to my grandma, are there any movies about grandmas? I'll watch that to unwind for sure.	y
person 2	おばあちゃんかあ。ごめん、ちょっと調べる時間をちょうだい！	Grandmas… huh, let me see. Sorry, give me some time to find something.	y
