# Supplementary material
Source: ML conference proceedings conference paper supplement (https://aclanthology.org/2022.eval4nlp-1.9)
Supplement: SupplementaryMaterial [file 0112.xlsx]

## Sheet: Sheet1
person	source	translation	evaluation: is this a good translation?
person 1	おはようございまーす。あ～、ねむ。わたし、早起き苦手なんだよね～。	Good morning, I'm not very good at getting up early, are you?	y
person 2	あら、そうなんだ。低血圧とかなの？	Oh, yeah. Is that a low blood pressure pressure or something?	n
person 1	なんなんだろねー？ピーマン嫌いだから、食べないと低血圧になるとか？	I don't like Peman, so I don't want to eat too much blood.	n
person 2	なにそれー！わたしはCAやってるから、時差ボケ関係なく、どんな時刻でもピタッと起きれるよ。職業病かな？	Because I'm doing my job, and I'm doing my job, and I'm getting sick, and I'm doing my job, and I don't have time to get sick.	n
person 1	すご！そのスキル、わたしもほしい！！高校でも、朝練の時間とか、テスト勉強の時間とか、役に立ちそう！	Wow, I want those skins to be useful in high school, study time, test time!	n
person 2	ああ、テスト勉強をしなきゃって思ったら、わたしでも寝坊するかも！わたしが寝坊しないのは、密かに好きなパイロットが居るからかも！	Oh, well, if you don't want to study, I might be asleep, but I'm going to sleep with my pilot!	n
person 1	え？そうなのー？そんなオチなのかぁ。じゃぁわたしも、密かに好きなもの作ったら起きられるかな？	What if I do something that you like, too?	n
person 2	きっとそうだよ！わたしなんて、いつも夢の中でその人と夫婦になって、幸せな気分で目覚めるの。これって、わたしがいい夫婦の日に生まれたからかな？	I always wake up with him in my dreams, and this is how happy I was to be with him.	n
person 1	そんな夢見てるのー？すごくない？わたしなんて、陸上部で延々走ってる夢くらいしか見ないのに～。	What kind of dream do you think I've been running around in such a hurry?	n
person 2	それ、寝ても疲れがトレなさそうだね！たまには、映画とか見て頭をリセットしたほうが良いんじゃない？映画好きのわたしから、何かオススメしようか？	Do you want to reset that movie because I'm tired of sleeping in the middle of a movie or something?	n
person 1	あ、それ良いかも！わたし、おばあちゃん子だからさ、おばあちゃんに関するような映画ない？あったら、絶対リセットするために観るんだけど。	Would you like to see my grandmother's movie like a baby?	n
person 2	おばあちゃんかあ。ごめん、ちょっと調べる時間をちょうだい！	Sorry, Grandma, I need to check the time!	n
