# Supplementary material
Source: ML conference proceedings conference paper supplement (https://aclanthology.org/2022.eval4nlp-1.9)
Supplement: SupplementaryMaterial [file 0113.xlsx]

## Sheet: Sheet1
person	source	translation	evaluation: is this a good translation?
person 1	やっほー！元気してた？	Hey! How are you?	y
person 2	お？久しぶり。元気にしてたよ！そっちは？	Hey! Long time no see. I'm well how about you?	y
person 1	わたしさ、昨日、バイト先のコンビニの店長に叱られちゃって、凹んでるとこ！	Yesterday, I was scolded by my manager at the convenience store where I work, so I'm a bit down!	y
person 2	そうだったんだ～。お互い働くの下っ端だと大変だよね！わたしも、相変わらずスーパーでパートタイマーとして働いてるけど、店長とは仲は悪いわー。	Oh, I'm so sorry. It's rough being the bottom of the food chain, you and I. I'm still a part-time worker at a supermarket, and I don't get along with the store manager.	y
person 1	そっちも大変そうだねー。まあ、わたしのほうは。勤務中についつい漫画の立ち読みに没頭しちゃったから怒られても仕方ないんだけどね。	It's hard for you too, huh? Well, I can't blame him for getting mad at me since I was totally reading manga while I was working.	y
person 2	あはは！コンビニだもんね～。新刊出たら気になっちゃうっつーの。	Yikes! It's hard to resist the temptation when a new issue comes out at the convenience store.	y
person 1	分かってくれる？しかもさ、わたしが目指してるファッションデザイナーを題材にした漫画だったのー！読まずに居られないでしょ！	Do you get it? Besides it was even more tempting since the manga was about fashion designers which is what I want to become! I just couldn't help it!	y
person 2	そりゃ我慢できないっしょー！わたしも、趣味の貯金に関する主婦向け雑誌が置いてあったら、読みたくなっちゃうもん。	I wouldn't be able to either! I would be also be tempted if there was a women's magazine on 'how to save money' which is my hobby.	y
person 1	あー、そういうお客さん、いるいる！貯金とか節約のために、なにかしてたりする？	Oh, I see some customers who are like you! What do you do to save money?	y
person 2	してない～。勉強とか、考えたりするの得意じゃないからさー。適当に、貯金箱に小銭入れてるだけ。	I really don't do anything. I'm not very good at studying or thinking. I just put some change in a piggy bank.	y
person 1	なるほどー。それ、わたしも真似しようかな。暑いの苦手だから、はやく部屋にクーラー付けたいんだ！	I see. Maybe I will try that, too. I don't like the hot weather very much, so I want to get an air conditioner in my room soon!	y
person 2	良いんじゃない？でも、わたしのペースだと、何年かかるかわかんないけどね！	That's a good idea...But at my pace, you won't know how long it will take!	y
