# Supplementary material
Source: ML conference proceedings conference paper supplement (https://aclanthology.org/2022.eval4nlp-1.9)
Supplement: SupplementaryMaterial [file 0113.xlsx]

## Sheet: Sheet1
person	source	translation	evaluation: is this a good translation?
person 1	やっほー！元気してた？	How are you?	y
person 2	お？久しぶり。元気にしてたよ！そっちは？	Hey, how are you?	y
person 1	わたしさ、昨日、バイト先のコンビニの店長に叱られちゃって、凹んでるとこ！	I got bit by a manager at the convenience store yesterday!	n
person 2	そうだったんだ～。お互い働くの下っ端だと大変だよね！わたしも、相変わらずスーパーでパートタイマーとして働いてるけど、店長とは仲は悪いわー。	Yeah, well, I've been working with the supermarket ever since we worked together.	n
person 1	そっちも大変そうだねー。まあ、わたしのほうは。勤務中についつい漫画の立ち読みに没頭しちゃったから怒られても仕方ないんだけどね。	Well, I've been in a bad mood, too, and I've been in a lot of trouble lately.	n
person 2	あはは！コンビニだもんね～。新刊出たら気になっちゃうっつーの。	It's a convenience store!	n
person 1	分かってくれる？しかもさ、わたしが目指してるファッションデザイナーを題材にした漫画だったのー！読まずに居られないでしょ！	And you know I couldn't read fashion comic books!	n
person 2	そりゃ我慢できないっしょー！わたしも、趣味の貯金に関する主婦向け雑誌が置いてあったら、読みたくなっちゃうもん。	I can't wait to read that if I had a housewife's money, I'd like to read it.	n
person 1	あー、そういうお客さん、いるいる！貯金とか節約のために、なにかしてたりする？	Oh, you're saving money for that customer, huh?	n
person 2	してない～。勉強とか、考えたりするの得意じゃないからさー。適当に、貯金箱に小銭入れてるだけ。	No, I'm not good at learning, I'm just trying to get my money in a box, so...	n
person 1	なるほどー。それ、わたしも真似しようかな。暑いの苦手だから、はやく部屋にクーラー付けたいんだ！	Well, I'm too hot for that too, so I'd like to put it in my room as soon as possible!	n
person 2	良いんじゃない？でも、わたしのペースだと、何年かかるかわかんないけどね！	All right, but I don't know how long it takes to slow down!	n
