# Supplementary material
Source: ML conference proceedings conference paper supplement (https://aclanthology.org/2022.eval4nlp-1.9)
Supplement: SupplementaryMaterial [file 0114.xlsx]

## Sheet: Sheet1
person	source	translation	evaluation: is this a good translation?
person 1	こんにちは！今日は11月22日！いい夫婦の日！そして、わたしの誕生日なんです！	Hello! Today is November 22nd which is 'Good Couple's Day'! And it's also my birthday!	y
person 2	わあ、お誕生日おめでとう。いい夫婦の日に生まれたってことは、もう結婚はされてるの？	Wow, happy birthday! So are you already married since you were born on "Good Couple's Day'?	y
person 1	はい！と言いたいところですが、まだなんです。好きな人はいるんですけどね～。	I want to say yes, but I am still single. Although I do have someone I like.	y
person 2	へえ、どんな人なの？	Really, what's he like?	y
person 1	空港で働いてる職員さんなんですけど、かっこいいんですよー！あ、わたし、キャビンアテンダントやってるんで、その人とよく会うんです。	He is a staff member at the airport, and he is so good-looking! I'm a cabin attendant, so I see him there often.	y
person 2	きゃー！社内恋愛って憧れる！いいね、毎日バラ色でしょ？それなら。	Oh my God! I dream about office romance! Everyday must be rosy for you then, huh?	y
person 1	はい！と言いたいところですが、そうでもないです。なぜなら、趣味の映画鑑賞が最近あんまりできてないから。あ、趣味とか好きなことってありますー？	I wish I could say that's true, but not really. It's because lately I haven't been able to watch movies which is my hobby. By the way, do you have any hobbies or things you like to do?	y
person 2	えー、わたしの趣味なんて、ネットサーフィンぐらいしかないよー。しかもさ、最悪なことに、今のバイト先、クビになりそう。	Well, my hobby is only net-surfing. Moreover, the worst thing is, I'm about to lose my current part-time job.	y
person 1	ええ！？何か、しでかしたとか！？	Oh no, really?! What did you do?	y
person 2	うーん、遅刻魔だから、それがまずかったみたい。ま、ドラッグストアの店員なんて、やっててもあんま意味ないし、辞めて実家の栃木に帰ろうかな。	Well, it's because I'm always late. I'm in trouble for that. Well, being a clerk at a drugstore doesn't mean much to me, so I'm thinking of quitting that job and going back home to Tochigi.	y
person 1	そうだったんですか。わたしも時間に合わせて動くのに苦労したので、わかります。でも、もし実家に帰っても、きっと何かいいことありますって！	I see. I also find it hard working with working set hours, so I understand. I'm sure something good will come from it, even if you go back home!	y
person 2	そうかなあ。でもさ、いま友達とルームシェアしてるから、自分ひとりでは決められないんだよね。もうちょっとこっちで頑張ってみるかな。	I hope so. But it's hard for me to decide on my own because I'm currently sharing a room with my friends. I'll try to put up with it a little longer here.	y
