# Supplementary material
Source: ML conference proceedings conference paper supplement (https://aclanthology.org/2022.eval4nlp-1.9)
Supplement: SupplementaryMaterial [file 0114.xlsx]

## Sheet: Sheet1
person	source	translation	evaluation: is this a good translation?
person 1	こんにちは！今日は11月22日！いい夫婦の日！そして、わたしの誕生日なんです！	Hello, November 22nd, and my birthday!	n
person 2	わあ、お誕生日おめでとう。いい夫婦の日に生まれたってことは、もう結婚はされてるの？	Congratulations on your wedding day, are you married already?	y
person 1	はい！と言いたいところですが、まだなんです。好きな人はいるんですけどね～。	There are still people who like you.	n
person 2	へえ、どんな人なの？	Oh, what's he like?	y
person 1	空港で働いてる職員さんなんですけど、かっこいいんですよー！あ、わたし、キャビンアテンダントやってるんで、その人とよく会うんです。	He works at the airport, but I'm very excited to see him.	n
person 2	きゃー！社内恋愛って憧れる！いいね、毎日バラ色でしょ？それなら。	- You'll love him every day, right?	n
person 1	はい！と言いたいところですが、そうでもないです。なぜなら、趣味の映画鑑賞が最近あんまりできてないから。あ、趣味とか好きなことってありますー？	Yes, I'm trying to say, because I don't like the movies much lately, don't I?	n
person 2	えー、わたしの趣味なんて、ネットサーフィンぐらいしかないよー。しかもさ、最悪なことに、今のバイト先、クビになりそう。	Well, I only have my taste, and the worst thing to do is get fired right now!	n
person 1	ええ！？何か、しでかしたとか！？	Yes, what have you done?	n
person 2	うーん、遅刻魔だから、それがまずかったみたい。ま、ドラッグストアの店員なんて、やっててもあんま意味ないし、辞めて実家の栃木に帰ろうかな。	Well, it seems like it was too late for that, and I'm not going home, and I don't know what it means.	n
person 1	そうだったんですか。わたしも時間に合わせて動くのに苦労したので、わかります。でも、もし実家に帰っても、きっと何かいいことありますって！	Well, I know that I've been through a lot of time, but if I go home, I'll go home, too!	n
person 2	そうかなあ。でもさ、いま友達とルームシェアしてるから、自分ひとりでは決められないんだよね。もうちょっとこっちで頑張ってみるかな。	Look, I'm just trying to figure out if I can get another friend in my room right now.	n
