# Supplementary material
Source: ML conference proceedings conference paper supplement (https://aclanthology.org/2022.eval4nlp-1.9)
Supplement: SupplementaryMaterial [file 0115.xlsx]

## Sheet: Sheet1
person	source	translation	evaluation: is this a good translation?
person 1	あら、こんにちは。今から、スーパーのパートに行くところなんですよー。	Oh, hello. I'm going to the superstore now.	n
person 2	こんにちは。そうなんですね～。わたしは職場の楽器メーカーに出勤するところです。	Hello, I'm going to work for the founder of the Guide company.	n
person 1	お勤めご苦労さま。楽器メーカーにお勤めってことは、ご自身もなにか楽器をやるの？	Do you work for the instruments yourself?	n
person 2	いえ、演奏はせず、聴く方専門ですね。音楽鑑賞が趣味なんです。	No, no, no, no, no, no, no, no, no, no, no, no, no, no, no, no, no, no.	n
person 1	素敵な趣味ねえ。わたしなんて、貯金が趣味だから、そんな優雅な時間を過ごしたことないわ！	That's why I've never spent so much time saving my money!	n
person 2	そうなんですか？でも、貯金も素敵な趣味だと思いますよー。だって、わたしなんて、音楽の方にお金つぎ込んじゃってますもん。	Do you think I'm a great fan of money, too, but what kind of music am I?	n
person 1	それはそれで、良いお金の使い方だと思うわ。それじゃ、休みの日は、音楽を聞いて過ごす感じなの？	So I think it's a good day to spend the holidays listening to the music, huh?	n
person 2	はい。特に休みの日の夕暮れ時。あの時間に音楽を聴いていると、とっても懐かしい気分になるんです。	Yeah, especially when I hear the music on that evening.	n
person 1	まあ！センチメンタルな感じね！ユーミンの歌にもそういう風景があったわね。ああ、曲の名前が思い出せない！勉強苦手で、記憶力ゼロなのよ！	Well, there was a landscape in Uganiah's song that I couldn't remember, so I couldn't remember the name of the song.	n
person 2	なんでしたっけ？でも、ユーミンの曲って、そういうセンチメンタルな気分に浸れるもの多いですもんね。今日は仕事から帰ったら、ユーミン聴きます！	You know, when I came home today, I heard a lot of mineral water work, and I heard it.	n
person 1	そうね、わたしもこの勉強嫌いの硬い頭を叩いて、曲名を思い出す努力をしてみるわ！	Yeah, I hate to hear this name too.	n
person 2	仕事終わりが楽しみになってきました！お話しできて良かったです！	I'm happy to hear the end of my job!	n
