# Supplementary material
Source: ML conference proceedings conference paper supplement (https://aclanthology.org/2022.eval4nlp-1.9)
Supplement: SupplementaryMaterial [file 0115.xlsx]

## Sheet: Sheet1
person	source	translation	evaluation: is this a good translation?
person 1	あら、こんにちは。今から、スーパーのパートに行くところなんですよー。	Oh, hello. I'm just about to go to my part-time work at the supermarket.	y
person 2	こんにちは。そうなんですね～。わたしは職場の楽器メーカーに出勤するところです。	Hi there. Is that right, I'm also leaving for work at an instrument maker.	y
person 1	お勤めご苦労さま。楽器メーカーにお勤めってことは、ご自身もなにか楽器をやるの？	You must work hard. Do you play any musical instruments since you work for an instrument manufacturer?	y
person 2	いえ、演奏はせず、聴く方専門ですね。音楽鑑賞が趣味なんです。	No, I don’t. I specialize in listening to music. It’s my hobby, listening to music.	y
person 1	素敵な趣味ねえ。わたしなんて、貯金が趣味だから、そんな優雅な時間を過ごしたことないわ！	That's a lovely hobby. That is such a beautiful way to spend time, which I never seem to have because saving money is my hobby!	y
person 2	そうなんですか？でも、貯金も素敵な趣味だと思いますよー。だって、わたしなんて、音楽の方にお金つぎ込んじゃってますもん。	Is that right? I think saving money is also a wonderful hobby. I spend too much money on music.	y
person 1	それはそれで、良いお金の使い方だと思うわ。それじゃ、休みの日は、音楽を聞いて過ごす感じなの？	I think that is a very good way to spend money. So, do you usually spend time listening to music on your day off?	y
person 2	はい。特に休みの日の夕暮れ時。あの時間に音楽を聴いていると、とっても懐かしい気分になるんです。	Yes, especially on my days off around sunset, I feel very nostalgic listening to music at that time.	y
person 1	まあ！センチメンタルな感じね！ユーミンの歌にもそういう風景があったわね。ああ、曲の名前が思い出せない！勉強苦手で、記憶力ゼロなのよ！	Oh, that sounds very sentimental! I think there was a song by Yuming, which is like that. Oh, I can't remember the name of the song! I'm not good at studying and I have zero memory!	y
person 2	なんでしたっけ？でも、ユーミンの曲って、そういうセンチメンタルな気分に浸れるもの多いですもんね。今日は仕事から帰ったら、ユーミン聴きます！	What was it… there are many lyrics in Yuming's songs that put you into that sentimental mood. I will listen to Yuming when I get home after work!	y
person 1	そうね、わたしもこの勉強嫌いの硬い頭を叩いて、曲名を思い出す努力をしてみるわ！	That sounds good. I'll work on my stubborn lazy head and try to remember the name of that song!	y
person 2	仕事終わりが楽しみになってきました！お話しできて良かったです！	I'm looking forward to the end of work now! It was good talking to you!	y
