# Supplementary material
Source: ML conference proceedings conference paper supplement (https://aclanthology.org/2022.eval4nlp-1.9)
Supplement: SupplementaryMaterial [file 0116.xlsx]

## Sheet: Sheet1
person	source	translation	evaluation: is this a good translation?
person 1	やっほー。聞いてよー。またドラッグストアの仕事、遅れちゃった～。やばい。	Hey, do you have a minute? I was late for work again at the drugstore. It's so bad.	y
person 2	えー！それはやばい！怒られなかった？	Yikes! That is bad! Did you get in trouble?	y
person 1	怒られた！めっちゃ怒られた！もう友達からも遅刻魔って呼ばれててさ、本当にやばいよね。	I did! I got plenty of warnings! Even my friends are telling me I'm always late for work. It is seriously bad.	y
person 2	あちゃー！でもさあ、遅刻ってしちゃうときはしちゃうよ！わたしも、この前、かなりやばかったもん！	Yikes! But there's not much you can do when you are just late! I was in a similar situation the other day!	y
person 1	まじで！？あなたでも、そんな時あるんだね。わたしは夜中、趣味のネットサーフィンがやめられなかったのが原因だと思ってるけど、あなたは何があったの？	Seriously!? Even you have times like that. I know I'm late because I can't stop surfing the net at nights. What happened with you?	y
person 2	わたしの場合は、迷子！方向音痴すぎて、自分でも嫌になっちゃうよ。就職がかかってるから、マジ焦った！	In my case, I got lost! I seriously lack a sense of direction, and I hate myself for that. My employment was on the line, so I was so stressed!	y
person 1	方向音痴！？まじで！？わたし、遅刻の理由で迷子使ってたけど、それ、ガチなやつじゃん。	No sense of direction, seriously!? I use getting lost as an excuse for being late, but that's a serious problem for you.	y
person 2	そう、ガチなやつ！しかも地図持ってて、普通迷うか？ってのよ。就活で初めて行く会社の面接でさあ。泣きたくなったわ。	Yes, that's right! I get lost even with a map, who does that?! It was on my way to my very first interview for a company. I wanted to cry.	y
person 1	それは泣きたくなる！いや、わたしだったら泣くわ！よく耐えたね。今、ルームシェアしてるんだけど、一緒に住んでる子もそういえば方向音痴だ。	It will make you want to cry! No, I would actually cry! You are tough. Come to think of it, one of my roommates also has no sense of direction.	y
person 2	そうなんだー！地図が読めない女って本が出たぐらいだから、結構多いのかもね！でさ、迷子の途中で雷が鳴ってきて、怖いやら焦るやら散々だったよ。	Is that right? There may be quite a lot of women who can't read maps because there is a book out with that title! On top of that, I was in a bad way when I got lost, it started thundering and I was so scared and stressed.	y
person 1	それは散々だわー。わたしも雷は得意じゃないもん。頑張ったね。	You must have been a mess. I'm also afraid of the lightning. You were strong.	y
person 2	ありがとー！しっかし、就職するなら、今住んでる東京のアパート周辺か、埼玉の実家そばにしようと思うよ。	Thank you for saying that! By the way, if I were to get a job, I'm going to find one close to my apartment in Tokyo where I live now or near my parents' home in Saitama.	y
