# Supplementary material
Source: ML conference proceedings conference paper supplement (https://aclanthology.org/2022.eval4nlp-1.9)
Supplement: SupplementaryMaterial [file 0116.xlsx]

## Sheet: Sheet1
person	source	translation	evaluation: is this a good translation?
person 1	やっほー。聞いてよー。またドラッグストアの仕事、遅れちゃった～。やばい。	Listen, I'm late for work again.	y
person 2	えー！それはやばい！怒られなかった？	Isn't it bad?	y
person 1	怒られた！めっちゃ怒られた！もう友達からも遅刻魔って呼ばれててさ、本当にやばいよね。	My friends are getting mad at me, too, and it's too late to call me late!	n
person 2	あちゃー！でもさあ、遅刻ってしちゃうときはしちゃうよ！わたしも、この前、かなりやばかったもん！	But when you're late, I was so fucked up last night!	n
person 1	まじで！？あなたでも、そんな時あるんだね。わたしは夜中、趣味のネットサーフィンがやめられなかったのが原因だと思ってるけど、あなたは何があったの？	Seriously, I didn't think there was anything like that in the middle of the night that your favorite server was gonna stop?	n
person 2	わたしの場合は、迷子！方向音痴すぎて、自分でも嫌になっちゃうよ。就職がかかってるから、マジ焦った！	If you hadn't been out of line, you'd be out on your own!	n
person 1	方向音痴！？まじで！？わたし、遅刻の理由で迷子使ってたけど、それ、ガチなやつじゃん。	Are you sure you're lost because I was late, but that's why you're late!	n
person 2	そう、ガチなやつ！しかも地図持ってて、普通迷うか？ってのよ。就活で初めて行く会社の面接でさあ。泣きたくなったわ。	Yeah, and the first thing I want to do is cry when you get a map, you know?	n
person 1	それは泣きたくなる！いや、わたしだったら泣くわ！よく耐えたね。今、ルームシェアしてるんだけど、一緒に住んでる子もそういえば方向音痴だ。	No, that would make me cry if I were you, but now I'm living with a girl in my room.	n
person 2	そうなんだー！地図が読めない女って本が出たぐらいだから、結構多いのかもね！でさ、迷子の途中で雷が鳴ってきて、怖いやら焦るやら散々だったよ。	No, I'm not scared of the sound of the sound of a bunch of dumb old ladies on the road!	n
person 1	それは散々だわー。わたしも雷は得意じゃないもん。頑張ったね。	It's a mess. I'm not good at thunder either.	y
person 2	ありがとー！しっかし、就職するなら、今住んでる東京のアパート周辺か、埼玉の実家そばにしようと思うよ。	Thanks, if you're working, I'm gonna live near Tokyo's apartment right now.	n
