# Supplementary material
Source: ML conference proceedings conference paper supplement (https://aclanthology.org/2022.eval4nlp-1.9)
Supplement: SupplementaryMaterial [file 0117.xlsx]

## Sheet: Sheet1
person	source	translation	evaluation: is this a good translation?
person 1	こんばんは。最近は随分、日が短くなったねー。秋は元々好きだし、こういう夕暮れをみると、鼻の奥がツンとするな。	Good evening. The days are getting shorter considerably lately, don't you think? I've always liked autumn, and when I look at the sunset, the back of my nose tingles.	y
person 2	鼻の奥がツン？夕暮れアレルギーってありましたっけ？	The back of your nose tingles? Is there an allergy to sunsets?	y
person 1	違う違う！もっと芸術の心を持てよ！センチメンタル、感傷的、そういう詩的な表現にしてくれる？	No, no! Have more artistic sense! Can you please be more poetic and say, are you sentimental or dreamy?	y
person 2	あ、違ったんですね！そういうことかぁ。わたし、今、看護師になりたくて千葉の看護学校に通ってるんですけど、てっきり医学系の話かと。	Oh, I mistook what you said! Now I understand. I'm studying at a nursing school in Chiba at the moment because I want to be a nurse. So my mind was thinking you were talking about a medical condition.	y
person 1	職業病だね、それ！わたしの場合は、趣味の音楽鑑賞が影響して、何でも歌の風景を思い起こさせるんだよ。	That is an occupational hazard! In my case, listening to music as my hobby makes me generate images.	y
person 2	わ～、特殊！でも、わたし、趣味でヨガやるんですけど、ヨガやってるときはヒマラヤの風景を思いながらやってるから、それと一緒ですかね？	Oh wow, that's unique! I do yoga as a hobby, and while I'm doing yoga, I often imagine the scenery of the Himalayan mountains. Would that be the same?	y
person 1	うーん、一緒かな？一緒ってことにしておこうか。ヨガやるなら、曲を聞きながらやったりしないの？	Umm, I wonder… well, let's say it is. Do you not listen to music while you do yoga?	y
person 2	そうですね～。あんまり聞かないかなー？でも、注射が苦手なので、注射を打つときは、ハイテンションな曲を頭に流しながら、テンション上げて打ってます！	No, I usually don't. However, I 'm still working on my injection skills, so when I do them, I play high-tension music in my head and psyche myself up when I have to!	y
person 1	やば！それ、失敗しない？テンションを上げるよりも、集中力を身につけたほうが良いんじゃない？楽器を始めてみたらどうだろ？うちの楽器、安くしとくよ？	Seriously?! Wouldn’t that be harder? I think it's better to develop your concentration than to raise your tension. Why don't you start learning a musical instrument? I can give you a discount.	y
person 2	え？楽器屋さんだったんですか？楽器って、お高いんでしょー？そんなに安くしてもらえるんですか～？	Really? Do you work at a musical instrument shop? Aren't musical instruments expensive? Would you give me a big discount?	y
person 1	群馬の実家の工房からも卸してるから、かなり安く手に入るよ。任せといて！	I can get our instruments from my family's factory in Gunma at wholesale, so I can get them quite cheap. Leave it up to me!	y
person 2	やった！じゃぁ今度のバレンタインデー、私の誕生日なんですけど、それでお安くしてください！約束ですよ～。	Yay! Maybe you can give me a discount for the next Valentine's Day, which is my birthday! It's a promise.	y
