# Supplementary material
Source: ML conference proceedings conference paper supplement (https://aclanthology.org/2022.eval4nlp-1.9)
Supplement: SupplementaryMaterial [file 0117.xlsx]

## Sheet: Sheet1
person	source	translation	evaluation: is this a good translation?
person 1	こんばんは。最近は随分、日が短くなったねー。秋は元々好きだし、こういう夕暮れをみると、鼻の奥がツンとするな。	Hello, I haven't had a long day since the fall, and I like it so much, and I like it so much, don't push my nose around like this.	n
person 2	鼻の奥がツン？夕暮れアレルギーってありましたっけ？	Did you have any cornals in the back?	n
person 1	違う違う！もっと芸術の心を持てよ！センチメンタル、感傷的、そういう詩的な表現にしてくれる？	No, no, no, no, no, no, no, no, no, no, no, no, no, no, no, no, no, no, no, no, no, no, no, no, no, no, no, no, no, no, no, no, no, no, no, no, no, no, no, no, no, no, no, no, no, no, no, no, no, no, no, no, no, no, no, no, no, no, no, no, no, no, no, no, no, no, no, no, no, no, no, no, no, no, no, no, no, no, no, no, no, no, no, no, no, no, no, no, no, no, no, no, no, no, no, no, no, no, no, no!	n
person 2	あ、違ったんですね！そういうことかぁ。わたし、今、看護師になりたくて千葉の看護学校に通ってるんですけど、てっきり医学系の話かと。	I'm going to be a nurse now, and I'm going to be a nurse in Chiba school!	n
person 1	職業病だね、それ！わたしの場合は、趣味の音楽鑑賞が影響して、何でも歌の風景を思い起こさせるんだよ。	If you think about it, you'll think about it, but if you don't think about it, you'll be able to do anything about it!	n
person 2	わ～、特殊！でも、わたし、趣味でヨガやるんですけど、ヨガやってるときはヒマラヤの風景を思いながらやってるから、それと一緒ですかね？	Well, I'm going to do something special, but when I do, I think I'm going to do something with my hobby, and when I do, I'm going to ask you to play a song with Yoga?	n
person 1	うーん、一緒かな？一緒ってことにしておこうか。ヨガやるなら、曲を聞きながらやったりしないの？	Well, do you want to play a song with her?	n
person 2	そうですね～。あんまり聞かないかなー？でも、注射が苦手なので、注射を打つときは、ハイテンションな曲を頭に流しながら、テンション上げて打ってます！	Well, don't listen so much, but when you hit a needle in your head, you're cutting it in your head!	n
person 1	やば！それ、失敗しない？テンションを上げるよりも、集中力を身につけたほうが良いんじゃない？楽器を始めてみたらどうだろ？うちの楽器、安くしとくよ？	What if it's not as easy as trying to concentrate on your instruments?	n
person 2	え？楽器屋さんだったんですか？楽器って、お高いんでしょー？そんなに安くしてもらえるんですか～？	Did you know that the instruments were so cheap?	n
person 1	群馬の実家の工房からも卸してるから、かなり安く手に入るよ。任せといて！	I've got a very cheap family traineyard out of the crowd.	n
person 2	やった！じゃぁ今度のバレンタインデー、私の誕生日なんですけど、それでお安くしてください！約束ですよ～。	Then promise me my birthday is cheap!	n
