# Supplementary material
Source: ML conference proceedings conference paper supplement (https://aclanthology.org/2022.eval4nlp-1.9)
Supplement: SupplementaryMaterial [file 0118.xlsx]

## Sheet: Sheet1
person	source	translation	evaluation: is this a good translation?
person 1	こんにちは。夏って、なんでこんなに暑くて、雷が多いんだろう。	Hello. Why is summer so hot and thundery?	y
person 2	そうですねー。こういう季節って、熱中症で救急車を呼ぶ人が多くて、救急救命士としては、ほんとに忙しいんですよ。	Well, there are a lot of people who call the ambulance because of heat strokes during this season, and I am really busy as an paramedic.	y
person 1	そういうお仕事されてる方なんですね。それは忙しいですよね。わたし、雷が苦手なんで、夏って嫌いなんです。せっかく誕生日があるのに。	Oh, you are in that line of work. It must get busy. I hate summer because I don't like thunder even though my birthday is in summer.	y
person 2	それは悲しいですね。それじゃ、夏には、いい思い出があまりないんですか？	That's so sad. So, don't you have any good memories in summer?	y
person 1	ないんです～。地図が読めないほどの方向音痴なのに、友達とバーベキューして、沢で迷子になったこともあります。	I don't. I cannot read a map and have no sense of direction, and got lost in the valley on my way back from a barbecue with my friends.	y
person 2	それは大変な思いをしましたね。わたしは夏は結構好きなんですけどねえ。仕事は忙しいですが、夏は恋の季節ですからね！	That was a difficult experience. I actually do like summer. I'm busy at work, but summer is the season of love!	y
person 1	恋の季節、ですか？	The season of love?	y
person 2	そうそう！彼女募集中の身としては、海に繰り出したり、生まれ育った横浜の港で、ナンパしまくるんです！	Yes! For someone looking for a girlfriend, I usually go to pick up girls at the beach or at the port of Yokohama where I was born and raised!	y
person 1	わ～、チャラい！でも、なんだか、今どきの若者？第七世代？って感じがしますね。	Oh my god, you're so shallow! You sound like today's young generation or the popular seventh generation comedians.	y
person 2	チャラいですけど、海辺で、鍛え抜かれた筋肉を見せたら、女の子の方からも逆ナンしてきたりするんですよ！	I might sound shallow, but girls come on to me for my firm muscular body!	n
person 1	そういうものなんですかねぇ。わたしの地元埼玉では、農業で鍛えられた筋肉をもった男性は結構いましたけど、あまり興味は持ちませんでした。やっぱり東京や横浜みたいな都会は違うなぁ。	Is that so? In my hometown of Saitama, there were quite a few men with well-built bodies from working on the farm, but I was not very interested. It must be different in the city like Tokyo and Yokohama.	y
person 2	農業とは違うでしょ！しかし、実際に付き合うとなると、スイーツカフェめぐりとか甘いものを食べさせられるのには辟易しますがね。	It's different from farming! But actually going out with these girls on dates wasn't so easy, going and eating sweets at cafés.	y
