# Supplementary material
Source: ML conference proceedings conference paper supplement (https://aclanthology.org/2022.eval4nlp-1.9)
Supplement: SupplementaryMaterial [file 0118.xlsx]

## Sheet: Sheet1
person	source	translation	evaluation: is this a good translation?
person 1	こんにちは。夏って、なんでこんなに暑くて、雷が多いんだろう。	Hello. Why is there so much lightning in this hot summer?	y
person 2	そうですねー。こういう季節って、熱中症で救急車を呼ぶ人が多くて、救急救命士としては、ほんとに忙しいんですよ。	Well, this time, there's a lot of people calling an ambulance, and I'm really busy calling an ambulance, as a medical ambulance.	n
person 1	そういうお仕事されてる方なんですね。それは忙しいですよね。わたし、雷が苦手なんで、夏って嫌いなんです。せっかく誕生日があるのに。	Well, I don't like it when you're working, but I don't like lightning at summer.	n
person 2	それは悲しいですね。それじゃ、夏には、いい思い出があまりないんですか？	That's a sad summer, isn't it?	n
person 1	ないんです～。地図が読めないほどの方向音痴なのに、友達とバーベキューして、沢で迷子になったこともあります。	No, no, no, no, no, no, no, no, no, no, no, no, no, no, no, no, no, no, no, no, no, no, no, no, no, no, no, no, no, no, no, no, no, no, no, no, no, no, no, no, no, no, no, no, no, no, no, no, no, no, no, no, no, no, no, no, no, no, no, no, no, no, no, no, no, no, no, no, no, no, no, no, no, no, no, no, no, no, no, no, no, no, no, no, no, no, no, no, no, no, no, no, no, no, no, no, no, no, no, no!	n
person 2	それは大変な思いをしましたね。わたしは夏は結構好きなんですけどねえ。仕事は忙しいですが、夏は恋の季節ですからね！		n
person 1	恋の季節、ですか？	The love season?	y
person 2	そうそう！彼女募集中の身としては、海に繰り出したり、生まれ育った横浜の港で、ナンパしまくるんです！	Yeah, she grew up on the beach, and she grew up on the beach, and she grew up on the beach, and she grew up in the middle of nowhere.	n
person 1	わ～、チャラい！でも、なんだか、今どきの若者？第七世代？って感じがしますね。	But what's the sixth generation now?	n
person 2	チャラいですけど、海辺で、鍛え抜かれた筋肉を見せたら、女の子の方からも逆ナンしてきたりするんですよ！	I'm in the middle of a drought, but if I can show my muscles to a girl, I can show them how to handle a muscle!	n
person 1	そういうものなんですかねぇ。わたしの地元埼玉では、農業で鍛えられた筋肉をもった男性は結構いましたけど、あまり興味は持ちませんでした。やっぱり東京や横浜みたいな都会は違うなぁ。	Well, there was a lot of men in my local market who had no interest in growing muscles!	n
person 2	農業とは違うでしょ！しかし、実際に付き合うとなると、スイーツカフェめぐりとか甘いものを食べさせられるのには辟易しますがね。	But it would be different from what I've done in Tokyo or New York City, and it would be different from having some sweet money.	n
