# Supplementary material
Source: ML conference proceedings conference paper supplement (https://aclanthology.org/2022.eval4nlp-1.9)
Supplement: SupplementaryMaterial [file 0119.xlsx]

## Sheet: Sheet1
person	source	translation	evaluation: is this a good translation?
person 1	ねえ、聞いて。今日もまた学校の先生に怒られちゃったよ。	Hey, listen, I've been mad at my school teacher today.	n
person 2	ええ？どうしたの？何があったの？	What happened?	y
person 1	今日さ－、看護学校の実習で、注射打たなきゃいけなくて、失敗しまくり。注射ってホント苦手なんだよね。	Well, I'm not really good at taking a shot at a nurse's school today.	n
person 2	そうだったの。わかるわ。わたしも、看護学校に通ってた時は注射苦手だったもの。今はもう助産師になって長いから、慣れっこだけどね。	Yeah, I know that when I went to the medical school, I was too old to be a healer anymore.	n
person 1	へえ！助産師さんなんだ！ねえ、血とか怖くない？わたしの学校、千葉にあるんだけど、そこの友達は血が怖いから別の進路に変更したんだよ。	Well, I'm scared to change my blood on the other side of the school, because my friends are not afraid to change it.	n
person 2	もう怖くないわ。だって、血を怖がってたら、助産師の仕事なんて、全然務まらないもの。	Because I'm not afraid of blood anymore, and I don't have a job to do.	n
person 1	そうだよねー。わたしも頑張らなくちゃなー。なんかコツとかあるのかな？	Is there a trick I should do too?	y
person 2	そうねぇ、慣れかしら。あとは、頑張った自分にご褒美をあげたりね。わたしの場合は趣味のカラオケ。	Well, I'm used to getting used to it, and I'm going to give myself a raise or two of my taste.	n
person 1	カラオケ！趣味をやると、嫌いなものも克服できるってこと？わたしの場合はヨガなんだけど。	What if I don't like getting a taste at the Caracas?	n
person 2	じゃぁ注射や血を見ても怖がらなかった自分に、ヨガのイベント参加というご褒美をあげるなんていうのはどう？ちょうど、わたしの誕生日、ひな祭りの日に、ヨガのイベントがあるらしいわよ。	Well, I didn't mean to scare myself, but I didn't think I'd give myself a chance to raise my own blood and blood, did I?	n
person 1	イベントかあ。それなら、わたしの誕生日はバレンタインデーなんだけど、月命日ならぬ月誕生日に、ゴディバのチョコを自分にプレゼントしようかな。	Well, I guess I'll have to have a birthday party for my birthday party at the Year's Eve.	n
person 2	あ！それも良いんじゃない！？そうすれば、きっと、みるみるうちに、看護の実習も上達するわよ！	I think that's a good idea, too!	n
