# Supplementary material
Source: ML conference proceedings conference paper supplement (https://aclanthology.org/2022.eval4nlp-1.9)
Supplement: SupplementaryMaterial [file 0119.xlsx]

## Sheet: Sheet1
person	source	translation	evaluation: is this a good translation?
person 1	ねえ、聞いて。今日もまた学校の先生に怒られちゃったよ。	Hey, listen. I got in trouble at school again today.	y
person 2	ええ？どうしたの？何があったの？	Oh no, what's wrong? What happened?	y
person 1	今日さ－、看護学校の実習で、注射打たなきゃいけなくて、失敗しまくり。注射ってホント苦手なんだよね。	Today, I had to give injections for training at my nursing school, and I totally failed. I'm really not good at injections.	y
person 2	そうだったの。わかるわ。わたしも、看護学校に通ってた時は注射苦手だったもの。今はもう助産師になって長いから、慣れっこだけどね。	I'm sorry, I understand. When I was at nursing school, I was not good at injections either. I've been a midwife for a long time, so I'm used to it now.	y
person 1	へえ！助産師さんなんだ！ねえ、血とか怖くない？わたしの学校、千葉にあるんだけど、そこの友達は血が怖いから別の進路に変更したんだよ。	Really! You're a midwife! Are you not afraid of blood? I go to a school in Chiba, and my friend there had changed to a different course because she was afraid of blood.	y
person 2	もう怖くないわ。だって、血を怖がってたら、助産師の仕事なんて、全然務まらないもの。	I'm not scared anymore. You can't do the work of a midwife, if you are afraid of blood.	y
person 1	そうだよねー。わたしも頑張らなくちゃなー。なんかコツとかあるのかな？	You're right. I'll have to try harder. Do you have any tips?	y
person 2	そうねぇ、慣れかしら。あとは、頑張った自分にご褒美をあげたりね。わたしの場合は趣味のカラオケ。	Well, I guess you have to get used to it. And I give myself a reward for doing my best. In my case, that would be my hobby, karaoke.	y
person 1	カラオケ！趣味をやると、嫌いなものも克服できるってこと？わたしの場合はヨガなんだけど。	Karaoke! Do you mean that if you do something you enjoy, you can overcome what you dislike? In my case, it would be yoga.	y
person 2	じゃぁ注射や血を見ても怖がらなかった自分に、ヨガのイベント参加というご褒美をあげるなんていうのはどう？ちょうど、わたしの誕生日、ひな祭りの日に、ヨガのイベントがあるらしいわよ。	So why don't you reward yourself by participating in a yoga event when you weren't scared of injections or seeing blood? There seems to be a yoga event on my birthday which is Girl's Day.	y
person 1	イベントかあ。それなら、わたしの誕生日はバレンタインデーなんだけど、月命日ならぬ月誕生日に、ゴディバのチョコを自分にプレゼントしようかな。	An event, huh? Then, since my birthday is on Valentine's Day, maybe I'll gift myself Godiva chocolates every 14th of the month to celebrate me.	n
person 2	あ！それも良いんじゃない！？そうすれば、きっと、みるみるうちに、看護の実習も上達するわよ！	Well, that sounds good too! If you keep doing that, you will surely improve your nursing skills in no time!	y
