# Supplementary material
Source: ML conference proceedings conference paper supplement (https://aclanthology.org/2022.eval4nlp-1.9)
Supplement: SupplementaryMaterial [file 0120.xlsx]

## Sheet: Sheet1
person	source	translation	evaluation: is this a good translation?
person 1	good evening . how are you doing ?	こんばんは？元気？	y
person 2	i am okay how are u	まあまあです、あなたは？	y
person 1	trying to think of new names to use in a romance novel .	ロマンス小説で使う新しい名前を考えようとしてたよ。	y
person 2	nice is this your first time creating a romance novel ?	素敵ですね、ロマンス小説を創作するのは今回が初めてですか？	y
person 1	no , i have written a few , but it is not my only job .	いや、何作か書いたんだけど、これだけが仕事じゃないからね。	y
person 2	that is good what else do you do besides writing books ?	良いですね、本を書く以外にはどんなお仕事をしてるんですか？	y
person 1	i work in a diner and cook . just do not ask me to sing !	レストランで働く料理人なんだよ、歌を歌えなんて言わないでね！	y
person 2	lol very nice what kinds of foods do you cook at the diner ?	（笑）すごく面白いですね。レストランではどんな食べ物を料理するんですか？	y
person 1	whatever a person wants . what do you do for work ?	お客が食べたいものなら何でも。君の仕事は何？	n
person 2	i work as a infant assistant teacher at a daycare	託児所で赤ちゃんの保育補助として働いています。	y
person 1	that sounds like a lot of responsibility ! guess you like babies !	責任が重そうだね！君は赤ちゃんが好きなんだろうね！	y
person 2	yea its not my life longcareer it will work for now	はい、一生続ける仕事ではないけど、当面はこれで良いですよ。	y
person 1	what do you want to do for your life long career ?	一生続ける仕事としては何がしたいの？	y
person 2	i want to work for myself work from home run my own homedaycare whafabout you ?	自営したいんですよ、自宅で働いて、自分の託児所を経営したいんです、あなたはどうですか？	n
