# Supplementary material
Source: ML conference proceedings conference paper supplement (https://aclanthology.org/2022.eval4nlp-1.9)
Supplement: SupplementaryMaterial [file 0120.xlsx]

## Sheet: Sheet1
person	source	translation	evaluation: is this a good translation?
person 1	good evening . how are you doing ?	こんばんは今晩はどうですか ？	n
person 2	i am okay how are u	大丈夫です	n
person 1	trying to think of new names to use in a romance novel .	新しい名前を考えてみてください恋愛小説の使用を考えてみます。	n
person 2	nice is this your first time creating a romance novel ?	初めてロマンス小説を作ったのはいつだ ？	n
person 1	no , i have written a few , but it is not my only job .	いやいくつか書いたが俺の仕事じゃない	n
person 2	that is good what else do you do besides writing books ?	本以外に何を書いてるんだ ？	n
person 1	i work in a diner and cook . just do not ask me to sing !	食堂で料理と料理をしてるだけよ ！	n
person 2	lol very nice what kinds of foods do you cook at the diner ?	食堂で何を料理してるの ？	y
person 1	whatever a person wants . what do you do for work ?	好きな人が欲しいなら仕事は何をする ？	n
person 2	i work as a infant assistant teacher at a daycare	I 'm work a babies a n d work a n d I care o n a Day (私は日食教師として仕事をしている)	n
person 1	that sounds like a lot of responsibility ! guess you like babies !	多くの責任を感じているようだ赤ん坊が好きなようだな ！	n
person 2	yea its not my life longcareer it will work for now	私の人生ではなく今の私の人生は上手くいくでしょう	n
person 1	what do you want to do for your life long career ?	長いキャリアに何をしたいの ？	n
person 2	i want to work for myself work from home run my own homedaycare whafabout you ?	家から出てきた日から仕事をしたいのか ？	n
