# Supplementary material
Source: ML conference proceedings conference paper supplement (https://aclanthology.org/2022.eval4nlp-1.9)
Supplement: SupplementaryMaterial [file 0120.xlsx]

## Sheet: Sheet1
person	source	translation	evaluation: is this a good translation?
person 1	こんにちは。わたし、横浜出身なんですが、あなたはどちらのご出身ですか？	Hello. I'm from Yokohama, where are you from?	y
person 2	わたしは、転勤で石川県に来て日が浅いんです。出身地からはかなり離れてますね。	I've just been transferred to Ishikawa Prefecture for work. My home town is quite far away from here.	y
person 1	そうなんですか。石川県って、良いところですよね。わたし、救急救命士の仕事をしてるんですが、ここらへんの人たちはみんな優しくて良いですよね。	Is that right? Ishikawa Prefecture is a nice place, isn't it? I work as a paramedic, and all the people here are nice and kind.	y
person 2	そうですね。でも、救急救命士って、お忙しいでしょう？	Yes, I agree. You must be busy being a paramedic?	y
person 1	そうですね。でも、みなさんの力になれるのなら、このくらいの忙しさ、へでもないですよ。体は鍛えてますしね。	Yes, I can be. But it's nothing, when I think I can be of help to the people here. I also train my body.	y
person 2	さすがですね。わたしなんて銀行員だから、生っちろい身体で、もやしみたいですよ。しかも趣味はゲームですからねえ。	You must be strong. I'm a banker and so pale and lanky. On top of that, my hobby is playing games.	y
person 1	ゲームされてる方なんですか？わたし、今、彼女募集中なんですけど、最近はオンライン上で彼女作る方もいらっしゃるとか？	Are you a gamer? I'm looking for a girl friend right now, and I hear there are people who meet online.	y
person 2	いやあ、わたしの場合はオンラインゲームをやるとしても、オセロなんで、女子には人気がないですね！	Well, I do play games online but it's Othello, and it's not very popular with girls!	y
person 1	そうなんですか～。残念だなぁ。参考になるゲームだったら、お話伺いたかったんですけどね。	Is that so? What a pitty. If the game was helpful, I would have wanted to hear more about it.	y
person 2	ああ、でも、わたしの友達なら知ってるかもしれないし、今度、聞いておきますよ！わたしね、人の頼みは断れない人間なんで、任せてください。	My friend might know a good game. Let me ask him! I won't let you down, so please leave it to me.	y
