# Supplementary material
Source: ML conference proceedings conference paper supplement (https://aclanthology.org/2022.eval4nlp-1.9)
Supplement: SupplementaryMaterial [file 0120.xlsx]

## Sheet: Sheet1
person	source	translation	evaluation: is this a good translation?
person 1	こんにちは。わたし、横浜出身なんですが、あなたはどちらのご出身ですか？	Hello, I'm from the beach, which beach are you from?	n
person 2	わたしは、転勤で石川県に来て日が浅いんです。出身地からはかなり離れてますね。	I've been here a long day since I came to work in the penitentiary.	n
person 1	そうなんですか。石川県って、良いところですよね。わたし、救急救命士の仕事をしてるんですが、ここらへんの人たちはみんな優しくて良いですよね。	Well, we're all very nice in this area, aren't we?	n
person 2	そうですね。でも、救急救命士って、お忙しいでしょう？	But they're all very busy with the ambulance, right?	n
person 1	そうですね。でも、みなさんの力になれるのなら、このくらいの忙しさ、へでもないですよ。体は鍛えてますしね。	Yeah, but if I can help you, I'm not that busy with this kind of work, and I'm trained to work for my body.	n
person 2	さすがですね。わたしなんて銀行員だから、生っちろい身体で、もやしみたいですよ。しかも趣味はゲームですからねえ。	You're right, I'm a banker, and I'm like a banker, and I'm not a big fan of my hobby.	n
person 1	ゲームされてる方なんですか？わたし、今、彼女募集中なんですけど、最近はオンライン上で彼女作る方もいらっしゃるとか？	Is she working on a game, or is she still on the line?	n
person 2	いやあ、わたしの場合はオンラインゲームをやるとしても、オセロなんで、女子には人気がないですね！	Well, if I had to play online, I wouldn't be popular with girls!	n
person 1	そうなんですか～。残念だなぁ。参考になるゲームだったら、お話伺いたかったんですけどね。	Well, I'm sorry to hear about that game, but I'd like to talk to you about it if I were you.	n
person 2	ああ、でも、わたしの友達なら知ってるかもしれないし、今度、聞いておきますよ！わたしね、人の頼みは断れない人間なんで、任せてください。	Well, if you're my friend, you might know who I am, but I'm asking you now!	n
