# Supplementary material
Source: ML conference proceedings conference paper supplement (https://aclanthology.org/2022.eval4nlp-1.9)
Supplement: SupplementaryMaterial [file 0121.xlsx]

## Sheet: Sheet1
person	source	translation	evaluation: is this a good translation?
person 1	はあー！今日も一日お疲れさま！いい一日だった？	Was it a good day today?	n
person 2	お疲れ様～。良い一日だったけどさ～、太ってるわたしには、疲れる一日だったわ～。	It was a good day, but I was getting tired all day, and I was getting tired of both of us!	n
person 1	お互い大変だよねー。わたしの方は、急なお産が3件も入って、ヘトヘト！でも爽快な気分！	Oh, my God, we're in a hurry, but I feel like I'm in a hurry!	n
person 2	お産が３件も！そりゃやり遂げたって感じだね！本当にお疲れ様！ところで、カレーって好き？	Do you really like curry, by the way?	n
person 1	好き好き！わたしのよく行くカラオケ店で出るカレーが、じつは隠れた名品なの！	I like to go to the Caribbean and hide the curry!	n
person 2	そうなんだ～。わたし、料理が好きで、カレーライスを作るのが得意なんだけど、良かったら今度食べにこない？	Yes, I like to eat rice, but if you don't like rice next time, why don't you come and cook rice?	n
person 1	行くー！カレー作る以外に、ほかの料理はどうなの？	- What else do you want to eat?	n
person 2	色々作っちゃうよ！でもね、作った分だけ食べちゃうから、こんなに太っちゃって。しかも運動全般苦手だし。	But I've made a lot of money, and I'm so fat and I'm so fat and I'm tired of all the exercise.	n
person 1	あー、それは、お互い言わないことにしとこ！わたしもさあ、ひな祭りに生まれたせいか、あられを食べ始めると止まらないんだわ。	Oh, that's where I'm born, and I can't stop eating.	n
person 2	あられかぁ。あれは自分で作らないけど、美味しいもんね。やめられない止まらない！	Oh, it's not making it myself, it's delicious but I can't stop it!	n
person 1	そうそう、それそれ！わたし、富山に嫁いできて友達がなかなかできなかったけど、あなたみたいな知り合いができて嬉しい！	Oh, it's so nice to have a friend in the mountains, but I couldn't stop you!	n
person 2	ほんとー？そういってもらえると嬉しいな！これからもよろしくね！	- I'm so glad to see you!	n
