# Supplementary material
Source: ML conference proceedings conference paper supplement (https://aclanthology.org/2022.eval4nlp-1.9)
Supplement: SupplementaryMaterial [file 0121.xlsx]

## Sheet: Sheet1
person	source	translation	evaluation: is this a good translation?
person 1	はあー！今日も一日お疲れさま！いい一日だった？	Phew! Another day, another dollar! Did you have a good day?	y
person 2	お疲れ様～。良い一日だったけどさ～、太ってるわたしには、疲れる一日だったわ～。	Well done for the day. I had a good day, but it was tiring for someone overweight like me.	y
person 1	お互い大変だよねー。わたしの方は、急なお産が3件も入って、ヘトヘト！でも爽快な気分！	It's hard for both of us. I had three unscheduled births, and I am exhausted! Although I feel exhilarated!	y
person 2	お産が３件も！そりゃやり遂げたって感じだね！本当にお疲れ様！ところで、カレーって好き？	Three extra deliveries! You must feel a sense of accomplishment! Well done! By the way, do you like curry?	y
person 1	好き好き！わたしのよく行くカラオケ店で出るカレーが、じつは隠れた名品なの！	I love, love curry! The curry served at the karaoke place I often go to is actually a hidden gem!	y
person 2	そうなんだ～。わたし、料理が好きで、カレーライスを作るのが得意なんだけど、良かったら今度食べにこない？	Is that right? I like cooking and I'm good at making curry and rice. If you'd like, why don't you come over for a meal sometime?	y
person 1	行くー！カレー作る以外に、ほかの料理はどうなの？	I'd love to! What other dishes are you good at besides curry?	y
person 2	色々作っちゃうよ！でもね、作った分だけ食べちゃうから、こんなに太っちゃって。しかも運動全般苦手だし。	I can make many dishes! I tend to eat everything I make, that's why I'm so overweight. On top of that, I'm not good at exercise in general.	y
person 1	あー、それは、お互い言わないことにしとこ！わたしもさあ、ひな祭りに生まれたせいか、あられを食べ始めると止まらないんだわ。	Ah, let's not go there. I was born on Girl's Day so when I start eating sweet rice puffs, I can't stop.	y
person 2	あられかぁ。あれは自分で作らないけど、美味しいもんね。やめられない止まらない！	Those Hina puff crackers. I don't make them myself, but they are delicious. I can't stop either!	y
person 1	そうそう、それそれ！わたし、富山に嫁いできて友達がなかなかできなかったけど、あなたみたいな知り合いができて嬉しい！	Yes, I know the feeling! Since I came to Toyama after marrying my husband I haven't been able to make any friends. I am so happy to get to know someone like you!	y
person 2	ほんとー？そういってもらえると嬉しいな！これからもよろしくね！	Really? I'm very happy to hear that! It's great to be your friend!	y
