# Supplementary material
Source: ML conference proceedings conference paper supplement (https://aclanthology.org/2022.eval4nlp-1.9)
Supplement: SupplementaryMaterial [file 0122.xlsx]

## Sheet: Sheet1
person	source	translation	evaluation: is this a good translation?
person 1	こんにちは。わたし、銀行に勤めてるんですけど、最近石川県の方に転勤してきたんですよ。よろしくお願いします。	Hello. I work at a bank, and I've just been transferred to Ishikawa prefecture recently. Pleased to meet you.	y
person 2	こちらこそ、よろしくお願いします。外から来ると、石川って、方言がきつく聞こえます？	Likewise, thank you. When you come to Ishikawa from outside, do you find the dialect hard to understand?	y
person 1	そうですか？今のところは、そんなに気になったことないですけど。でも、わたし、断るのが苦手なくらい引っ込み思案なので、きつく言ってもらった方が助かるかも。	Not so much so far, it hasn't concerned me so much. However, I'm shy and not good at saying no to people, so it helps me when people are more direct with me.	y
person 2	そうだったんですか。銀行勤めで断るのが苦手だと、業務に支障ないですか？	Is that so? If it's hard to refuse business at a bank, wouldn't that be difficult at work?	y
person 1	そうなんですよ～。頼まれたら引き受けちゃうので、仕事が忙しくって。まぁ、その分評判は良いのかもしれませんけど。	You might be right. I'll take on everything I'm asked to do, so I get very busy. Well, maybe that's not a bad thing as I have a good reputation.	y
person 2	なるほど！評判が良いのは羨ましいな。わたしはホームヘルパーをやってるんですが、お年寄りからちょっと怖がられるんですよ。	I see! I envy you for your reputation. I'm a domestic helper, but some elderly customers are a little scared of me.	y
person 1	そうなんですか？意外です。どうしてだろう？	Really, why is that? That sounds unusual.	y
person 2	どうやら、胸板が厚くて、いかつく見えるみたいなんです。初対面では怖がられますが、将棋が得意なので、それでプラマイゼロかな。	Apparently, my big chest and my intimidating looks scare them at first. But, I'm good at shogi, so that even things out.	y
person 1	なるほど！たしかに、その胸板はパワーありそうに見えますもんね！将棋が得意なんですか？わたしはオセロが得意なんです。	I see! You certainly do have a big powerful looking chest! And you are good at shogi? I am good at Othello.	y
person 2	オセロですか！将棋と似てますよね？	Oh, Othello! Is that similar to shogi?	y
person 1	ボードゲームっていう意味では似てますよね～。趣味がゲームなので、将棋もできますよ！今度一緒に勝負してみたいですね。	They are similar as far as they are both board games. Games are my hobby, and I can also play shogi! Let's play together some time.	y
person 2	ええ、ぜひ勝負したい！次の七夕の日は、わたしの誕生日で有給をとっているので、その時にお手合わせ願いたいな！	Yes, of course, I'd love to play! The next Tanabata day is my birthday and I took the day off, so why don't we get together then?	y
