# Supplementary material
Source: ML conference proceedings conference paper supplement (https://aclanthology.org/2022.eval4nlp-1.9)
Supplement: SupplementaryMaterial [file 0122.xlsx]

## Sheet: Sheet1
person	source	translation	evaluation: is this a good translation?
person 1	こんにちは。わたし、銀行に勤めてるんですけど、最近石川県の方に転勤してきたんですよ。よろしくお願いします。	Hello, I work for the bank, but I've been working for the bank for a long time now, please.	n
person 2	こちらこそ、よろしくお願いします。外から来ると、石川って、方言がきつく聞こえます？	It's nice to meet you, too. Can you hear me?	n
person 1	そうですか？今のところは、そんなに気になったことないですけど。でも、わたし、断るのが苦手なくらい引っ込み思案なので、きつく言ってもらった方が助かるかも。	Well, I've never felt that way in my life, but it's not as difficult as I'm supposed to be.	n
person 2	そうだったんですか。銀行勤めで断るのが苦手だと、業務に支障ないですか？	Well, maybe it's better if I didn't work for the bank, huh?	n
person 1	そうなんですよ～。頼まれたら引き受けちゃうので、仕事が忙しくって。まぁ、その分評判は良いのかもしれませんけど。	Well, if you ask me, it might be a good thing for that job.	n
person 2	なるほど！評判が良いのは羨ましいな。わたしはホームヘルパーをやってるんですが、お年寄りからちょっと怖がられるんですよ。	Well, my reputation is getting a little old for you guys to be scared of being old school.	n
person 1	そうなんですか？意外です。どうしてだろう？	Well, why not?	n
person 2	どうやら、胸板が厚くて、いかつく見えるみたいなんです。初対面では怖がられますが、将棋が得意なので、それでプラマイゼロかな。	Well, it looks as if the board is too thick and scary to see each other, so I don't know if I'm good at it.	n
person 1	なるほど！たしかに、その胸板はパワーありそうに見えますもんね！将棋が得意なんですか？わたしはオセロが得意なんです。	Yes, that board looks like a power mine.	n
person 2	オセロですか！将棋と似てますよね？	Do I look like Oharo?	n
person 1	ボードゲームっていう意味では似てますよね～。趣味がゲームなので、将棋もできますよ！今度一緒に勝負してみたいですね。	Sounds like a game, so I can play a game with you now!	n
person 2	ええ、ぜひ勝負したい！次の七夕の日は、わたしの誕生日で有給をとっているので、その時にお手合わせ願いたいな！	Yeah, I'd like to bet on the next day of my birthday!	n
