# Supplementary material
Source: ML conference proceedings conference paper supplement (https://aclanthology.org/2022.eval4nlp-1.9)
Supplement: SupplementaryMaterial [file 0123.xlsx]

## Sheet: Sheet1
person	source	translation	evaluation: is this a good translation?
person 1	こんにちは。今朝ね、スカートのチャックが閉まらなくて、我ながら愕然としちゃったわ。	Hello. This morning, my zipper on my skirt wouldn't close, and I was so shocked.	y
person 2	あらら。そんな風には見えないけど、もしかして、最近太っちゃった？もう一度言うけど、そんな風には見えないわよ？	Oh no, but you don't seem that way. Do you think you've gained weight recently? I'll say it again, you don’t seem like you have.	y
person 1	そう言ってくれるのは嬉しいけど、体重を聞いたら、絶対のけぞるわよ。たぶんねえ、カレーの食べすぎが原因よ。	Thank you for saying that, but I am sure you would be surprised if you heard how much I weigh. It must be because I eat too much curry.	y
person 2	カレー、そんなに食べちゃったの？わたしも辛い物は得意だから、カレーは食べちゃうのよね。酸っぱいものは苦手なんだけどね。	So, how much curry have you eaten? I'm also good with spicy foods, so I tend to eat lots of curry. But I don't like sour foods.	y
person 1	あら、酸っぱいものが駄目って、カレーに付けるらっきょも駄目？	Oh, if you can't do sour, then you can't even do the picked onions you put on your curry?	n
person 2	らっきょうは甘めのやつならギリギリかしら。長野で生まれ育って、小さい頃に酸っぱい漬物を食べすぎたせいかしらね。	If it's the sweet kind, I can somewhat manage. I was born and raised in Nagano, and it might be that I ate too many sour pickles when I was little.	y
person 1	あー、そういうことなのね！わたしはカレー作りが得意ってのの延長線で、らっきょも自分で漬けてるのよ。	Oh, I see! While I am good at curry-making, I also make my own pickled onions.	y
person 2	そうなの！？じゃぁ、甘めのを作ってくれたりする？それだと嬉しいわ。わたし、クリスマスイブが誕生日だから、その時までに漬けておいてくれないかしら？	Really!? Then can you make me some sweet ones? I would be so happy if you would. My birthday is on Christmas Eve, so maybe you would make some by then?	y
person 1	もちろんよ、おすそ分けするわ。ソーシャルワーカーをやってると色々ストレスが溜まるから、いろんな食べ物を作って発散してるの。	Of course, I can share some with you. I have a stressful job as a social worker, so I make a lot of food to ease my stress.	y
person 2	そうだったのね。わたし、薬剤師をしてるんだけど、やっぱり薬よりそういうことで健康を保った方が良いと思うわ。	That's a great idea. I'm a pharmacist, but I think it's better to stay healthy that way than relying on medicine.	y
person 1	そうよねー。あとは、運動すれば言うことなしなんだけど、そればっかりは苦手なのよー！	I think so, too. If I were better at exercise, there wouldn't be a problem. But I'm not good at that!	y
person 2	そういう患者さん、多いわよ。でも、体はやっぱり動かさないとね！わたし雪かきが得意なんだけど、雪かきでも運動にはなるわよ。	There are lots of patients like you. It's really important to move your body! I'm good at shoveling snow, and even that is a good form of exercise.	y
