# Supplementary material
Source: ML conference proceedings conference paper supplement (https://aclanthology.org/2022.eval4nlp-1.9)
Supplement: SupplementaryMaterial [file 0123.xlsx]

## Sheet: Sheet1
person	source	translation	evaluation: is this a good translation?
person 1	こんにちは。今朝ね、スカートのチャックが閉まらなくて、我ながら愕然としちゃったわ。	Hello, Chuck. I couldn't close my skirt this morning.	n
person 2	あらら。そんな風には見えないけど、もしかして、最近太っちゃった？もう一度言うけど、そんな風には見えないわよ？	Well, it doesn't look like that, does it?	n
person 1	そう言ってくれるのは嬉しいけど、体重を聞いたら、絶対のけぞるわよ。たぶんねえ、カレーの食べすぎが原因よ。	I'm glad you're too fat to hear that, but I'm sure you'll be too fat to eat curry.	n
person 2	カレー、そんなに食べちゃったの？わたしも辛い物は得意だから、カレーは食べちゃうのよね。酸っぱいものは苦手なんだけどね。	I'm very good at curry, and I'm not good at curry either.	n
person 1	あら、酸っぱいものが駄目って、カレーに付けるらっきょも駄目？	Oh, no, no, no, no, no.	n
person 2	らっきょうは甘めのやつならギリギリかしら。長野で生まれ育って、小さい頃に酸っぱい漬物を食べすぎたせいかしらね。	If this guy was born today, he would have been too old to eat too much acid when he was little.	n
person 1	あー、そういうことなのね！わたしはカレー作りが得意ってのの延長線で、らっきょも自分で漬けてるのよ。	Oh, that's what I'm trying to do with curry, too.	n
person 2	そうなの！？じゃぁ、甘めのを作ってくれたりする？それだと嬉しいわ。わたし、クリスマスイブが誕生日だから、その時までに漬けておいてくれないかしら？	So, I'm glad you made it for me until Christmas?	n
person 1	もちろんよ、おすそ分けするわ。ソーシャルワーカーをやってると色々ストレスが溜まるから、いろんな食べ物を作って発散してるの。	Of course, I'm going to split up with the social worker, making lots of food.	n
person 2	そうだったのね。わたし、薬剤師をしてるんだけど、やっぱり薬よりそういうことで健康を保った方が良いと思うわ。	Well, I'm dealing drugs, but I think it's better if I keep my health better than that.	n
person 1	そうよねー。あとは、運動すれば言うことなしなんだけど、そればっかりは苦手なのよー！	Don't talk about it later, but I'm not good at it!	n
person 2	そういう患者さん、多いわよ。でも、体はやっぱり動かさないとね！わたし雪かきが得意なんだけど、雪かきでも運動にはなるわよ。	You're a patient, but I'm not good at the snowball!	n
