# Supplementary material
Source: ML conference proceedings conference paper supplement (https://aclanthology.org/2022.eval4nlp-1.9)
Supplement: SupplementaryMaterial [file 0124.xlsx]

## Sheet: Sheet1
person	source	translation	evaluation: is this a good translation?
person 1	こんにちは。わたし、ホームヘルパーをしているんですが、疲れてもやりがいがある仕事はいいですね。	Hello. I'm a domestic helper, and it's nice to have a job that's rewarding even though I get very tired.	y
person 2	こんにちは。ほんと偉い仕事だと思うわ。その仕事を選んだのは、ご両親の影響とかなの？	Hello. I think you have a really great job. Did you choose the job because of your parents?	y
person 1	両親は特に関係ないですね。わたし、力だけには自信があるので、この力を活かせる仕事に就こうかなって。ほら、見てください、この厚い胸板！	My parents didn't have much to do with it. I have confidence in my physical strength, so I wanted to get a job where I can make use of this power. Look, see my strong chest!	y
person 2	わあ！すごいわー。でも自分の長所をいかせる仕事に就けるって素敵よね。わたしなんて、全然関係ない仕事だもの。	Wow, it's awesome! It's nice to be able to work where you can use your strengths. My job has nothing to do with my abilities.	y
person 1	そうなんですか？どんな仕事をなさってるんですか？	Is that right? What kind of work do you do?	y
person 2	事務職をしてるの。昔から手先が器用で、ほんとうは美容師になりたかったんだけど、諦めちゃった。	I have clerical job. I've always been good with my hands and really wanted to become a hairdresser, but I gave up.	y
person 1	そうだったんですね。それはもったいないですね。ところで、山梨のご出身だったりしませんか？	I see, that's a shame. By the way, do you happen to be from Yamanashi?	y
person 2	ううん。別のところよ。今いる岐阜も、引っ越してきてまだ日が浅いの。	No, I'm not. I'm from a different place. I've just moved to Gifu where I currently live.	y
person 1	そうなんですかぁ。実はわたし、山梨の方言が好きなんです。だから、ネイティブな方の方言を生で聞いてみたくって。でも、なかなか出会わないんですよね～。	Is that so? Actually, I really like the dialect of Yamanashi. And I wanted to listen to the dialect from native speakers. I have yet to meet anyone who's a native.	y
person 2	確かに、山梨の方言ってあまり聞かないわね。でもイメージ的にはホッコリしてそうね！	You're right, you don't hear a lot of Yamanashi dialects. I imagine they sound warm and relaxed!	y
person 1	はい！素敵ですよ～。一度だけ、趣味の将棋で勝負をしていたおじいちゃんが、山梨の方言を聞かせてくれました。	Yes! It's lovely. I use to play shogi, which is my hobby by the way, with an elderly man who spoke to me in Yamanashi dialect.	n
person 2	そうだったのね。今度わたしも、山梨出身の人に出会ったら、聞かせてもらおっと！	Is that right? Next time when I meet someone from Yamanashi, I will ask them to speak in their dialect!	y
