# Supplementary material
Source: ML conference proceedings conference paper supplement (https://aclanthology.org/2022.eval4nlp-1.9)
Supplement: SupplementaryMaterial [file 0124.xlsx]

## Sheet: Sheet1
person	source	translation	evaluation: is this a good translation?
person 1	こんにちは。わたし、ホームヘルパーをしているんですが、疲れてもやりがいがある仕事はいいですね。	Hello. I'm getting tired of playing harper, but it's a good job.	n
person 2	こんにちは。ほんと偉い仕事だと思うわ。その仕事を選んだのは、ご両親の影響とかなの？	Hello, I think that's a really good job for your parents, don't you think?	n
person 1	両親は特に関係ないですね。わたし、力だけには自信があるので、この力を活かせる仕事に就こうかなって。ほら、見てください、この厚い胸板！	It doesn't matter. I just want to see if I can handle this piece of work, so I can see if I can do this very hard!	n
person 2	わあ！すごいわー。でも自分の長所をいかせる仕事に就けるって素敵よね。わたしなんて、全然関係ない仕事だもの。	That's great, but I don't have a job to do.	n
person 1	そうなんですか？どんな仕事をなさってるんですか？	What do you do for a living?	n
person 2	事務職をしてるの。昔から手先が器用で、ほんとうは美容師になりたかったんだけど、諦めちゃった。	I've always wanted to give up on a case that I've been working on, but I had to give up.	n
person 1	そうだったんですね。それはもったいないですね。ところで、山梨のご出身だったりしませんか？	Well, that was a hell of a lot of fun, wasn't it?	n
person 2	ううん。別のところよ。今いる岐阜も、引っ越してきてまだ日が浅いの。	No, no, no, no, no, no, no, no, no, no, no, no, no, no, no, no, no, no, no, no, no, no, no, no, no, no, no, no, no, no, no, no, no, no, no, no, no, no, no, no, no, no, no, no, no, no, no, no, no, no, no, no, no, no, no, no, no, no, no, no, no, no, no, no, no, no, no, no, no, no, no, no, no, no, no, no, no, no, no, no, no, no, no, no, no, no, no, no, no, no, no, no, no, no, no, no, no, no, no, no.	n
person 1	そうなんですかぁ。実はわたし、山梨の方言が好きなんです。だから、ネイティブな方の方言を生で聞いてみたくって。でも、なかなか出会わないんですよね～。		n
person 2	確かに、山梨の方言ってあまり聞かないわね。でもイメージ的にはホッコリしてそうね！	But I don't think that's so hard to hear, do you, hockey?	n
person 1	はい！素敵ですよ～。一度だけ、趣味の将棋で勝負をしていたおじいちゃんが、山梨の方言を聞かせてくれました。	Yes, he was just playing a game with his hobby.	n
person 2	そうだったのね。今度わたしも、山梨出身の人に出会ったら、聞かせてもらおっと！	Next time you met him, tell him I met him in the mountains!	n
