# Supplementary material
Source: ML conference proceedings conference paper supplement (https://aclanthology.org/2022.eval4nlp-1.9)
Supplement: SupplementaryMaterial [file 0125.xlsx]

## Sheet: Sheet1
person	source	translation	evaluation: is this a good translation?
person 1	いやー、今年の冬は雪が多いですね！東京人は雪に慣れてないから、ちょっと降っただけでも、転ぶ人が多いとか。	Oh well, we've had a lot of snow this winter! People in Tokyo aren't used to the snow, so there are lots of people slipping with just a little snow on the ground.	y
person 2	そうなんですよ。わたしは滋賀県で開業した病院で医師をやってるんですが、東京の医師仲間は、そういう転倒患者さんをよく看ているらしいです。	That's true. I am a self employed doctor in Shiga prefecture, but I hear from my doctor friends in Tokyo that they see many patients who come to them after a fall.	y
person 1	あー、やっぱりねー！長野で生まれ育ったんですが、雪道の歩き方にコツがいるんですよ。あなたは滋賀で生まれ育ったんですか？	Yeah, I thought so! I was born and raised in Nagano, so I know that you need to know there is a way to walk snowy paths. Were you born and raised in Shiga?	y
person 2	はい、滋賀で生まれ育ちました。車の運転が下手なので、こちらには今日は新幹線で来ています。	Yes, I was born and raised in Shiga. I'm not very good at driving, so I've come here by Shinkansen today.	y
person 1	そうだったんですか、ご苦労なことです。今朝は長野でも大雪が降りましてね、わたしは朝から雪かきをしとりました。	Is that right? You must've had a long trip. It was snowing pretty heavily in Nagano this morning, so I started the day shoveling snow.	y
person 2	そうだったんですか！大雪の中の雪かきは大変ですよね。苦労はお互い様ですね。わたし、ゴルフが得意なんですが、この時期は雪でゴルフができないのが残念です。	Oh wow! Shoveling snow while it's snowing heavily must not be easy. We both had a rough day already. I am actually a pretty good golfer, and I miss playing golf during this snow season.	y
person 1	ああ、雪解けが待ち遠しいですねえ。雪かきはかなり得意な方なんですが、今朝は熱中しすぎて仕事に遅刻しそうになっちゃいましたよ。	Oh, I can't wait for the snow season to end. I'm very good at shoveling snow, but this morning I got into it so much that I was almost late for work.	y
person 2	それは大変だ。わたしは優柔不断なので、朝食で、コーヒーにするか牛乳にするか迷って、診療に遅刻しそうになったことがあります。	Oh my. I am always so indecisive, I can't choose between having coffee or milk for breakfast. I was once almost late for my surgery.	y
person 1	それはまずいでしょう！わたしは小さな薬局の薬剤師なんで、多少遅れても、誰にも怒られないです！	That would be bad! I work as a pharmacist at a small pharmacy, so even if I'm a little late, I won't get in trouble!	y
person 2	そうですよね。医者がそんなことで遅刻したら、信用問題です。もう、それからは朝はコーヒーと固定して飲むことにしました。	You're right. If the doctor is late for the office for such a reason, his reputation will be on the line. Since then, I've decided to stick with coffee in the morning.	y
person 1	なるほど、それは名案です。しかし、明日は筋肉痛になりそうだな。疲労にはレモンが良いと聞くが、酸っぱいものが苦手なんです。どうしましょ？	Indeed, that's a good idea. But I have a feeling I am going to be sore tomorrow. I hear lemons are good for fatigue, but I don't like sour things. What should I do?	y
person 2	そうですねぇ。牡蠣やしじみなどにも、疲労回復、滋養効果がありますので、そういうものなら酸っぱくなくて良いかもしれませんよ。	Let's see. There are oysters and shijimi clams that are nourishing and also good for fatigue recovery, and those are not sour.	y
