# Supplementary material
Source: ML conference proceedings conference paper supplement (https://aclanthology.org/2022.eval4nlp-1.9)
Supplement: SupplementaryMaterial [file 0125.xlsx]

## Sheet: Sheet1
person	source	translation	evaluation: is this a good translation?
person 1	いやー、今年の冬は雪が多いですね！東京人は雪に慣れてないから、ちょっと降っただけでも、転ぶ人が多いとか。	No, there's a lot of snow this winter, but Tokyo people don't get used to snow.	n
person 2	そうなんですよ。わたしは滋賀県で開業した病院で医師をやってるんですが、東京の医師仲間は、そういう転倒患者さんをよく看ているらしいです。	Yes, I'm doing a job at Kouga's hospital, but Dr. Tokyo's friends are falling for that doctor!	n
person 1	あー、やっぱりねー！長野で生まれ育ったんですが、雪道の歩き方にコツがいるんですよ。あなたは滋賀で生まれ育ったんですか？	Ah, you're the one who grew up in Nagano, aren't you?	n
person 2	はい、滋賀で生まれ育ちました。車の運転が下手なので、こちらには今日は新幹線で来ています。	Yes, I grew up here today because I'm not good at the new train tracks.	n
person 1	そうだったんですか、ご苦労なことです。今朝は長野でも大雪が降りましてね、わたしは朝から雪かきをしとりました。	Well, that was a long day ago, and I fell out of the snowstorm this morning.	n
person 2	そうだったんですか！大雪の中の雪かきは大変ですよね。苦労はお互い様ですね。わたし、ゴルフが得意なんですが、この時期は雪でゴルフができないのが残念です。	Oh, I'm very good at playing golf this afternoon.	n
person 1	ああ、雪解けが待ち遠しいですねえ。雪かきはかなり得意な方なんですが、今朝は熱中しすぎて仕事に遅刻しそうになっちゃいましたよ。	Yeah, well, I can't wait to solve the snow, but this morning I'm getting too tired to work too late.	n
person 2	それは大変だ。わたしは優柔不断なので、朝食で、コーヒーにするか牛乳にするか迷って、診療に遅刻しそうになったことがあります。	I'm late for breakfast, and I'm late for breakfast.	n
person 1	それはまずいでしょう！わたしは小さな薬局の薬剤師なんで、多少遅れても、誰にも怒られないです！	I wouldn't be mad if I was a small drug dealer, but I'm not mad at anyone!	n
person 2	そうですよね。医者がそんなことで遅刻したら、信用問題です。もう、それからは朝はコーヒーと固定して飲むことにしました。	Yeah, well, when the doctor was late, it was a matter of trust and trust that the coffee was already locked in the morning.	n
person 1	なるほど、それは名案です。しかし、明日は筋肉痛になりそうだな。疲労にはレモンが良いと聞くが、酸っぱいものが苦手なんです。どうしましょ？	Well, that's a good idea, but tomorrow, I hear a good bone is gonna get better, and I'm not good enough to ask for lemon.	n
person 2	そうですねぇ。牡蠣やしじみなどにも、疲労回復、滋養効果がありますので、そういうものなら酸っぱくなくて良いかもしれませんよ。	I don't know if it's gonna work, but it's gonna get better and better and better.	n
