# Supplementary material
Source: ML conference proceedings conference paper supplement (https://aclanthology.org/2022.eval4nlp-1.9)
Supplement: SupplementaryMaterial [file 0126.xlsx]

## Sheet: Sheet1
person	source	translation	evaluation: is this a good translation?
person 1	こんにちは。最近、岐阜に引っ越してきたんですけど、この辺のこと、よくわからなくて。あなたは、この辺りの方ですか？	Hello, I haven't seen you in a while, but you're from around here, aren't you?	n
person 2	ええ、そうですよ。お仕事か何かで、いらしたんですか？	Yes, I did. Did you need a job or something?	n
person 1	いえ、妻と結婚して、妻の実家の方に引っ越してきたというわけです。本当は美容師になって、東京で働きたかったんですけどね。	No, I was married to my wife, and I really wanted to go to Tokyo to work in Tokyo.	n
person 2	ああ、結婚すると、自分ひとりの好きには出来ませんからね。それで、いまは、どんなお仕事を？	Oh, I can't marry myself now, so what do you do for a living?	n
person 1	今は事務職に就いています。東京で美容師になりたいって思ったのは、カリスマ美容師に憧れていただけなので。	I just wanted to be a sculptor in Tokyo, so I thought it would be nice to be a sculptor.	n
person 2	いや、夢があると、人生は楽しくなりますからね。事務職だと、肩こりや腰痛になってませんか？	No, if you have a dream, life will be fun, right?	n
person 1	そういえば、最近肩こりがひどいかもしれません。パソコンにずっと向かっているからですかね。	No, it may be horrible because you've been in a bad mood, and now you're in a bad mood.	n
person 2	そうそう、そういう人、多いんですよ。わたし、すぐ近くでマッサージをやってるので、今度是非いらしてください。	Yeah, well, there's a lot of people out there doing massage right now.	n
person 1	そうなんですか！それは是非！趣味のDIYで、体を動かしている気になっていましたが、よく考えたら動いてるのはほとんど指先だけですもんね。	Well, I was just thinking of moving my body in New York.	n
person 2	ああ、運動は適度にしたほうが良いですよ。学生時代はバレーボールをやってましたが、最近、テレビで見た錦織圭選手の影響で、テニスにハマってるんです。	Yeah, well, I've seen a lot of good tennis players at the tennis game lately, and I've seen most of the time.	n
person 1	錦織選手、かっこいいですもんね！あの活躍を見ていたら、テニスをやってみたくなる気持ち、わかります。	Well, if you look at that tennis game, you'll feel good about it.	n
person 2	でしょう？ぜひ、あなたも始めてみてくださいよ！	Do you mind starting?	n
