# Supplementary material
Source: ML conference proceedings conference paper supplement (https://aclanthology.org/2022.eval4nlp-1.9)
Supplement: SupplementaryMaterial [file 0126.xlsx]

## Sheet: Sheet1
person	source	translation	evaluation: is this a good translation?
person 1	こんにちは。最近、岐阜に引っ越してきたんですけど、この辺のこと、よくわからなくて。あなたは、この辺りの方ですか？	Hello. I recently moved to Gifu, so I am not very familiar with the area. Are you from around here?	y
person 2	ええ、そうですよ。お仕事か何かで、いらしたんですか？	Yes, I am. Did you move with your work or something?	y
person 1	いえ、妻と結婚して、妻の実家の方に引っ越してきたというわけです。本当は美容師になって、東京で働きたかったんですけどね。	No, I married my wife who is from this area and moved close to her parents. I really wanted to become a hairdresser and work in Tokyo.	y
person 2	ああ、結婚すると、自分ひとりの好きには出来ませんからね。それで、いまは、どんなお仕事を？	Oh, when you get married, you can't just think of yourself. So, what kind of work do you do now?	y
person 1	今は事務職に就いています。東京で美容師になりたいって思ったのは、カリスマ美容師に憧れていただけなので。	I have a clerical job now. I wanted to be a hairdresser in Tokyo because I was into celebrity hairdressers.	y
person 2	いや、夢があると、人生は楽しくなりますからね。事務職だと、肩こりや腰痛になってませんか？	That's okay, when you have a dream, life becomes fun. If you are in an office job, won't you have stiff shoulders or lower back pain?	y
person 1	そういえば、最近肩こりがひどいかもしれません。パソコンにずっと向かっているからですかね。	Come to think of it, my shoulders seem really stiff these days. It must be because I am in front of the computer all day.	y
person 2	そうそう、そういう人、多いんですよ。わたし、すぐ近くでマッサージをやってるので、今度是非いらしてください。	I think you're right. There are many people like that. I work as a masseuse in this area, so please come by.	y
person 1	そうなんですか！それは是非！趣味のDIYで、体を動かしている気になっていましたが、よく考えたら動いてるのはほとんど指先だけですもんね。	Is that right? I really should! I had it in my mind that I am moving my body with my DIY hobby, but when you think about it, all I do is move my fingers.	y
person 2	ああ、運動は適度にしたほうが良いですよ。学生時代はバレーボールをやってましたが、最近、テレビで見た錦織圭選手の影響で、テニスにハマってるんです。	Yes, you should definitely exercise moderately. When I was a student, I used to play volleyball, but recently I'm into tennis since watching Kei Nishikori on TV.	y
person 1	錦織選手、かっこいいですもんね！あの活躍を見ていたら、テニスをやってみたくなる気持ち、わかります。	Nishikori, he is so cool! When you see him play, I can understand why you'd want to play tennis.	y
person 2	でしょう？ぜひ、あなたも始めてみてくださいよ！	Right? Why don't you start playing too?!	y
