# Supplementary material
Source: ML conference proceedings conference paper supplement (https://aclanthology.org/2022.eval4nlp-1.9)
Supplement: SupplementaryMaterial [file 0127.xlsx]

## Sheet: Sheet1
person	source	translation	evaluation: is this a good translation?
person 1	こんにちは。昨日、車庫入れで車をぶつけてしまってねえ。まいったな、こりゃ。	Hello. You know I hit my car in the garage yesterday. I'm awful with parking.	y
person 2	あらら、そうだったんですか。わたしも閉所恐怖症なもんで、車庫入れって苦手なんですよね。狭いじゃないですか。	Oh no, that's too bad. I am claustrophobic, so I am not good at parking in garages either. They are usually very narrow.	y
person 1	たしかに！ただ、我が家の車庫は広いですよ。問題はわたしの運転の腕のせいなんです。いやあ、お恥ずかしい！	That's so true! Having said so, our garage is pretty large. The problem is my parking skills. I am really ashamed!	y
person 2	そうだったんですか。良いなぁ、広い車庫。羨ましいです。わたしは三重県の県庁所在地に住んでいますが、家は小さいんですよ。	Is that so? You're lucky to have a large garage. I'm jealous. I live in the prefectural capital of Mie Prefecture, so I live in a small house.	y
person 1	県庁所在地なら栄えてるだろうし、仕方ないですよ。わたしは、滋賀の地方ですが、一応開業医なので、体面という意味もあって、そこそこ家が大きいんです。	Capitals are big and busy so it can't be helped. I live in a rural part of Shiga, and since I am a medical practitioner, I have to keep up an appearance so I live in a house that's quite large.	y
person 2	さすがですね。わたし、獣医師をしているんですが、開業医さんはやっぱり違いますね。	That's impressive! I'm a veterinarian, but it must be different for a medical practitioner.	y
person 1	おや。獣医さんでしたか！では、家でも何かペットを飼われてたりするんですか？	Oh, you're a veterinarian?! Do you have any pets at home?	y
person 2	ペットは飼っていないのですが、乗馬が好きで、しょっちゅう乗馬クラブの方で馬に会っています。	I don't have pets, but I like horse riding and I often visit the horses at the riding club.	y
person 1	馬は良いですよね、見た目も綺麗でカッコイイ！運動にもなりますよね！	Horses are beautiful! They have a beautiful appearance and look cool! It must be good exercise as well!	y
person 2	はい。足が長いので、馬に乗るときも苦労しないですし、わたしには合っているのかもしれません。	Yes. Because I have long legs, I don't have any trouble riding a horse, so it suits me.	y
person 1	いいですねえ。わたしは運動といえばゴルフ専門なんですが、優柔不断なので迷い迷い打つせいで、いつも場外ホームランばかり！	That sounds great. Speaking of exercise, my form of exercise is golf, and because I am indecisive, I'm never sure of my swings, so I hit off-field home runs all the time!	y
person 2	ゴルフって難しいって聞きますし、そういうこともありますよ。でも、きっとやってるうちに、うまくコース取りしていけるようになると思いますよ。	I hear that golf is a difficult sport, so that's understandable. But I'm sure you'll get the hang of it with more practice.	y
