# Supplementary material
Source: ML conference proceedings conference paper supplement (https://aclanthology.org/2022.eval4nlp-1.9)
Supplement: SupplementaryMaterial [file 0127.xlsx]

## Sheet: Sheet1
person	source	translation	evaluation: is this a good translation?
person 1	こんにちは。昨日、車庫入れで車をぶつけてしまってねえ。まいったな、こりゃ。	Hello, I didn't hit a car last night in the garage. Oh, my God.	n
person 2	あらら、そうだったんですか。わたしも閉所恐怖症なもんで、車庫入れって苦手なんですよね。狭いじゃないですか。	Oh, well, I'm not that small at the garage either.	n
person 1	たしかに！ただ、我が家の車庫は広いですよ。問題はわたしの運転の腕のせいなんです。いやあ、お恥ずかしい！	It's just a big garage in my family. I'm ashamed of my driving!	n
person 2	そうだったんですか。良いなぁ、広い車庫。羨ましいです。わたしは三重県の県庁所在地に住んでいますが、家は小さいんですよ。	Well, I was lucky to have a third house in the supermarket, but I'm lucky to be alive.	n
person 1	県庁所在地なら栄えてるだろうし、仕方ないですよ。わたしは、滋賀の地方ですが、一応開業医なので、体面という意味もあって、そこそこ家が大きいんです。	If I were you, I'd be proud to open up a small house, too, so I'd say, "I'm a big fan."	n
person 2	さすがですね。わたし、獣医師をしているんですが、開業医さんはやっぱり違いますね。	You're right, I'm a veteran doctor, but you're right.	n
person 1	おや。獣医さんでしたか！では、家でも何かペットを飼われてたりするんですか？	Well, you're a veteran, aren't you?	n
person 2	ペットは飼っていないのですが、乗馬が好きで、しょっちゅう乗馬クラブの方で馬に会っています。	I don't have a pet. I love riding horses at the club every night.	n
person 1	馬は良いですよね、見た目も綺麗でカッコイイ！運動にもなりますよね！	The horses look good, too, and they look good!	n
person 2	はい。足が長いので、馬に乗るときも苦労しないですし、わたしには合っているのかもしれません。	Yes, because my foot may be long gone, but I'm sure there's nothing to do with it.	n
person 1	いいですねえ。わたしは運動といえばゴルフ専門なんですが、優柔不断なので迷い迷い打つせいで、いつも場外ホームランばかり！	Look, I'm a golf expert, but I'm always getting lost, and I'm always getting lost, so...	n
person 2	ゴルフって難しいって聞きますし、そういうこともありますよ。でも、きっとやってるうちに、うまくコース取りしていけるようになると思いますよ。	I know it's hard to say, but I know it's hard to say, but it's going to be a golf course.	n
