# Supplementary material
Source: ML conference proceedings conference paper supplement (https://aclanthology.org/2022.eval4nlp-1.9)
Supplement: SupplementaryMaterial [file 0128.xlsx]

## Sheet: Sheet1
person	source	translation	evaluation: is this a good translation?
person 1	こんにちは。わたし、スポーツ観戦が趣味でして、最近好きなテニスの試合を見てきました。あなたはスポーツされますか？	Hello. I like watching sports, and I went to see my favorite tennis games recently. Do you play any sports?	y
person 2	こんにちは！わたしは泳ぐのが得意ですよ。寒いのが苦手なので、屋内プールで、ノンビリ泳ぐのが気持ちいいです。	Hello! I'm good at swimming. I'm not good with cold weather, so it's nice to swim in an indoor pool.	n
person 1	水泳ですか！水泳も良いですよね。運動全般が好きなので、色々やっていますが、むかしはバレーボールをやっていました。	You swim! Swimming is good, isn't it? I like to exercise in general, so I do a lot of sports, I used to play volleyball.	y
person 2	ほほう！それじゃ、身長も高いんですか？	Well well, then. Are you tall?	y
person 1	はい。身長が高く、チームの人たちからも信頼されているということで、バレーボール部の主将を務めていたことがあるんです。	Yes, I am. I was once the captain of the volleyball team because I was tall and my teammates trusted me.	y
person 2	すごいですね！運動の後は、やっぱスポーツドリンクを飲みます？	That's amazing! Do you usually drink sports drinks after your exercise?	y
person 1	飲みますよ。やっぱり、運動の後は水分を適切に補給しなければならないですもんね。	Yes, I do. I think it's important to rehydrate properly to replenish after you exercise.	y
person 2	うーん、そうですよねえ。でもアレって、ちょっと甘いじゃないですか。わたしは緑茶を飲んじゃうんです。	Yes, you're right. But don't you think they are a little too sweet? I tend to drink green tea.	y
person 1	そうなんですか？まぁ確かに、甘くて苦手という人は多いですよね。	Is that right? Well, you're right that many people don't like sweet drinks.	y
person 2	ええ、飲み物といえば、スッキリしててほんのり苦味があるのが一番です。こういう考えは、静岡生まれゆえなんでしょうな。	Yes, the best beverages are refreshing and slightly bitter. I guess I think this way because I was born in Shizuoka.	y
person 1	なるほど！静岡のご出身でしたか。静岡はお茶で有名ですもんね。わたし、マッサージ師をしているんですが、わたしも仕事の後はお茶です。	I see! You are from Shizuoka. I know Shizuoka is famous for its tea. I'm a masseuse, and I usually have tea after work.	y
person 2	そうでしたか！お茶は、労働の後の飲み物としても、ピッタリですよね！	Is that right?! Tea is a perfect drink after a hard day's work!	y
