# Supplementary material
Source: ML conference proceedings conference paper supplement (https://aclanthology.org/2022.eval4nlp-1.9)
Supplement: SupplementaryMaterial [file 0128.xlsx]

## Sheet: Sheet1
person	source	translation	evaluation: is this a good translation?
person 1	こんにちは。わたし、スポーツ観戦が趣味でして、最近好きなテニスの試合を見てきました。あなたはスポーツされますか？	Hello, I've seen sports playing with my favorite tennis game lately?	n
person 2	こんにちは！わたしは泳ぐのが得意ですよ。寒いのが苦手なので、屋内プールで、ノンビリ泳ぐのが気持ちいいです。	Hello, I'm not very good at swimming in the pool, so I'm not good at swimming.	n
person 1	水泳ですか！水泳も良いですよね。運動全般が好きなので、色々やっていますが、むかしはバレーボールをやっていました。	I like swimming, and I like swimming, too.	n
person 2	ほほう！それじゃ、身長も高いんですか？	Well, how tall are they?	n
person 1	はい。身長が高く、チームの人たちからも信頼されているということで、バレーボール部の主将を務めていたことがあるんです。	Yes, they were high, high, high, high, high, high, high, high, high, high and high, and high, and high.	n
person 2	すごいですね！運動の後は、やっぱスポーツドリンクを飲みます？	Great. After exercise, did you have a sports drink?	n
person 1	飲みますよ。やっぱり、運動の後は水分を適切に補給しなければならないですもんね。	Yes, I did. After exercise, I have to make some water right after the exercise.	n
person 2	うーん、そうですよねえ。でもアレって、ちょっと甘いじゃないですか。わたしは緑茶を飲んじゃうんです。	Well, that's a little sweet, but I drank a little tea.	n
person 1	そうなんですか？まぁ確かに、甘くて苦手という人は多いですよね。	Oh, yeah, well, I'm not very good at that, are you?	n
person 2	ええ、飲み物といえば、スッキリしててほんのり苦味があるのが一番です。こういう考えは、静岡生まれゆえなんでしょうな。	Yeah, well, I think it would be best if I said drink, but it would be the most difficult thing for Shizuoka.	n
person 1	なるほど！静岡のご出身でしたか。静岡はお茶で有名ですもんね。わたし、マッサージ師をしているんですが、わたしも仕事の後はお茶です。	I see that Shizuoka was from Shizuoka, and I'm famous for my massage massage too.	n
person 2	そうでしたか！お茶は、労働の後の飲み物としても、ピッタリですよね！	Yes, as a tea master, I was good at my work!	n
