# Supplementary material
Source: ML conference proceedings conference paper supplement (https://aclanthology.org/2022.eval4nlp-1.9)
Supplement: SupplementaryMaterial [file 0129.xlsx]

## Sheet: Sheet1
person	source	translation	evaluation: is this a good translation?
person 1	どうも、お久しぶりです。ついこの間、旅行先の阿蘇で乗馬を体験してきました！	Hey, it's been a while. I traveled to Aso just the other day, and experienced horseback riding!	y
person 2	お久しぶりです。阿蘇に行ってきたんですか！わたしもアウトドアレジャーが趣味なので、乗馬してみたいなぁ。	Long time no see. So you were in Aso? I'm also outdoorsy, so I would love to go horseback riding.	y
person 1	いいですよ、乗馬！わたしはこの1回だけで、大好きになっちゃいました。アウトドアはどんなことをするんですか？	Horseback riding is great! I fell in love with it after just this one time. What type of activities do you do outdoors?	y
person 2	人が多い場所が苦手なもので、どちらかというと少人数で動けるものが好きですね。たとえば、秘境で釣りとか。	I don't like places where there's a lot of people, and I like to do things that can be done in a small group, like fishing in unexplored areas.	y
person 1	ああ、それは仕事の息抜きにも良さそうですね。ところで、お仕事はいまは何かされてますか？	Oh, that sounds like a good way to take a break from work. By the way, what do you do for work?	y
person 2	仕事はキャリアコンサルタントをしています。仕事の関係で、最近徳島に移住したのですが、徳島は良いところですよ。	I am a career consultant. I recently moved to Tokushima with my work. Tokushima is a really nice place.	y
person 1	徳島ですか。行ったことがないです。こちらは三重の県庁所在地で獣医としてやってるので、移住は夢の夢だなあ。	Oh, you live in Tokushima? I've never been there. I am a veterinarian in the prefectural capital of Mie, so moving is unrealistic.	y
person 2	それじゃぁ、地元の患者さんからの信頼も厚いんでしょうね。ところで、ドライブが好きなんですが、車ってよく乗りますか？	Well then, I guess you've gained a lot of trust from your local patients. By the way, do you drive often? I like to go on driving trips.	y
person 1	乗りますよ！ただ、人より少し足が長めなので、運転席が窮屈ですね！あ、自慢じゃないですよ！	Yes, I do! However, my legs are a little longer than normal, so the driver's seat is often cramped! Oh, I'm not bragging!	y
person 2	あはは！たしかに、足長いですよね。運転に関しては、足が短い私の方が得ですね。まさかメリットになっていたとは！	Ha ha ha. You certainly have long legs. It must be better to have my short legs for driving. Who knew this would be a good thing?	y
person 1	そのポジティブさも、仕事柄でしょうかねえ。お仕事での成功をお祈りしてますよ！	It must be your work that keeps you positive. Good luck with your job!	y
person 2	ありがとうございます！あなたも、獣医のお仕事でのご成功、お祈りしています。	Thank you! I wish you luck as well, in your veterinary work.	y
