# Supplementary material
Source: ML conference proceedings conference paper supplement (https://aclanthology.org/2022.eval4nlp-1.9)
Supplement: SupplementaryMaterial [file 0129.xlsx]

## Sheet: Sheet1
person	source	translation	evaluation: is this a good translation?
person 1	どうも、お久しぶりです。ついこの間、旅行先の阿蘇で乗馬を体験してきました！	Hey, it's been a long time since I've been traveling with an idiot on the road!	n
person 2	お久しぶりです。阿蘇に行ってきたんですか！わたしもアウトドアレジャーが趣味なので、乗馬してみたいなぁ。	It's been a long time since I've been there, so I'd like to see a door for a ride, too!	n
person 1	いいですよ、乗馬！わたしはこの1回だけで、大好きになっちゃいました。アウトドアはどんなことをするんですか？	All right, I was going to love this door one time, but what does the wolf do?	n
person 2	人が多い場所が苦手なもので、どちらかというと少人数で動けるものが好きですね。たとえば、秘境で釣りとか。	Some people like to move in and move in and move out of nowhere, like a lot of people do.	n
person 1	ああ、それは仕事の息抜きにも良さそうですね。ところで、お仕事はいまは何かされてますか？	Yeah, well, that sounds good without a breath, so what's your job now?	n
person 2	仕事はキャリアコンサルタントをしています。仕事の関係で、最近徳島に移住したのですが、徳島は良いところですよ。	I've been working on a good career in the island for a long time now.	n
person 1	徳島ですか。行ったことがないです。こちらは三重の県庁所在地で獣医としてやってるので、移住は夢の夢だなあ。	So, as a doctor of the island, this is where you're supposed to live, as a hero, and you're not even supposed to be in the dream.	n
person 2	それじゃぁ、地元の患者さんからの信頼も厚いんでしょうね。ところで、ドライブが好きなんですが、車ってよく乗りますか？	So you'd like to drive a car with a local patient, too?	n
person 1	乗りますよ！ただ、人より少し足が長めなので、運転席が窮屈ですね！あ、自慢じゃないですよ！	I'm not proud of the driver!	n
person 2	あはは！たしかに、足長いですよね。運転に関しては、足が短い私の方が得ですね。まさかメリットになっていたとは！	I'm sure I've got a long ride to Meryton!	n
person 1	そのポジティブさも、仕事柄でしょうかねえ。お仕事での成功をお祈りしてますよ！	You're praying for that job, aren't you?	n
person 2	ありがとうございます！あなたも、獣医のお仕事でのご成功、お祈りしています。	Thank you, sir. You're a veteran doctor and a successful man.	n
