# Supplementary material
Source: ML conference proceedings conference paper supplement (https://aclanthology.org/2022.eval4nlp-1.9)
Supplement: SupplementaryMaterial [file 0130.xlsx]

## Sheet: Sheet1
person	source	translation	evaluation: is this a good translation?
person 1	こんにちは～、寒いですね。わたし、寒いのが苦手なんですよ。	Hello, I'm cold. I don't like cold.	n
person 2	へえ、そうなんだ。南国生まれなの？	Oh, yeah. Are you from South America?	n
person 1	南国って言えば南国かな？静岡の南の方です。こんな寒い日は、緑茶が一番！あ、緑茶ありますけど、飲みます？	It's the most cold day of the day, isn't it?	n
person 2	あ、いいですね、緑茶。でも、緑茶よりも、昆布茶が好きかな。わたしは、根っからの大阪人なんで。	Oh, well, I like ceramics more than green tea, but I like herpes from my roots.	n
person 1	そうなんですか！わたしは緑茶をよく飲んでるんですけど、大阪の方は昆布茶が好きなんですね。	Yeah, well, I like raspberry tea.	n
person 2	関西は昆布出汁の文化ですからね。ついでにいえば、たこ焼き文化もあります！一家に一台、たこ焼き器！	In the West, Uganda is a culture of inflation, so as long as it's done, there are a lot of cultures in the family!	n
person 1	あ、それ、テレビで見たことあります！本当にあるんですね～。そういえば、大阪出身の患者さんもたこ焼き作るのが得意って言ってたなぁ。	Well, I've seen it on TV, too.	n
person 2	そりゃもう、わたしも得意中の得意ですよ！今度、わたしの技を見せたいです！	I'm really good at it now!	n
person 1	ぜひぜひ！たこ焼き、わたしも好きなので、作っていただけたら嬉しいです！その時は、先ほど言った患者さんもご一緒して良いですか？心理カウンセラーをしているのですが、治療に役立つかも。	If you like it, I'd be more pleased to be a doctor than to say, because I liked it as much as I do.	n
person 2	もちろんいいですよ。物を覚えるのが得意で、1台のたこ焼き器で色んな味のを同時に作れるから、何人来てもOKです！	Of course, I'm good at what I know, because I'm good at eating a whole lot of food at the same time!	n
person 1	すごいですね！それは楽しみです！じゃぁ患者さんの方にも声をかけておきますね。	Well, that's great!	n
person 2	ぜひぜひ！楽しみにしています！	I'm happy to hear it too!	n
