# Supplementary material
Source: ML conference proceedings conference paper supplement (https://aclanthology.org/2022.eval4nlp-1.9)
Supplement: SupplementaryMaterial [file 0130.xlsx]

## Sheet: Sheet1
person	source	translation	evaluation: is this a good translation?
person 1	こんにちは～、寒いですね。わたし、寒いのが苦手なんですよ。	Hi there, isn't it chilly? I'm not very good with the cold weather.	y
person 2	へえ、そうなんだ。南国生まれなの？	Oh, is that right? Are you from the south?	y
person 1	南国って言えば南国かな？静岡の南の方です。こんな寒い日は、緑茶が一番！あ、緑茶ありますけど、飲みます？	I guess it's sort of the south. I am from the southern part of Shizuoka. Green tea is the best to drink on a cold day like this! I have some green tea. Would you like some?	y
person 2	あ、いいですね、緑茶。でも、緑茶よりも、昆布茶が好きかな。わたしは、根っからの大阪人なんで。	Oh, green tea sounds lovely. But I actually prefer kombu-cha to green tea. You see I am an Osaka-person through and through.	y
person 1	そうなんですか！わたしは緑茶をよく飲んでるんですけど、大阪の方は昆布茶が好きなんですね。	Is that right? I drink green tea often, but I guess people from Osaka like kombu-cha.	y
person 2	関西は昆布出汁の文化ですからね。ついでにいえば、たこ焼き文化もあります！一家に一台、たこ焼き器！	Kansai region is known for its kombu broth culture. Incidentally, there is also a takoyaki culture! You can find a takoyaki maker in every household!	y
person 1	あ、それ、テレビで見たことあります！本当にあるんですね～。そういえば、大阪出身の患者さんもたこ焼き作るのが得意って言ってたなぁ。	Oh, I've heard about it on TV! I guess it's true then. Come to think of it, I have a patient from Osaka who was telling me how good he was at making takoyaki.	y
person 2	そりゃもう、わたしも得意中の得意ですよ！今度、わたしの技を見せたいです！	Indeed, I am quite good at it as well! I want to show you my skills next time!	y
person 1	ぜひぜひ！たこ焼き、わたしも好きなので、作っていただけたら嬉しいです！その時は、先ほど言った患者さんもご一緒して良いですか？心理カウンセラーをしているのですが、治療に役立つかも。	By all means! I like takoyaki, so I'd be happy if you can make some for me! Would it be possible for me to bring my patient who I mentioned earlier? I'm a mental health counselor, and I feel it may be good for treatment.	y
person 2	もちろんいいですよ。物を覚えるのが得意で、1台のたこ焼き器で色んな味のを同時に作れるから、何人来てもOKです！	Yes, of course. I'm good at remembering things, so I can whip up different flavors at once using one takoyaki maker, no matter how many people I'm serving!	y
person 1	すごいですね！それは楽しみです！じゃぁ患者さんの方にも声をかけておきますね。	That's amazing! I look forward to it! I will also ask my patient if he's interested.	y
person 2	ぜひぜひ！楽しみにしています！	By all means! I look forward to it as well!	y
