# Supplementary material
Source: ML conference proceedings conference paper supplement (https://aclanthology.org/2022.eval4nlp-1.9)
Supplement: SupplementaryMaterial [file 0131.xlsx]

## Sheet: Sheet1
person	source	translation	evaluation: is this a good translation?
person 1	どうもー！徳島って人が少なくて、なんだか、とっても過ごしやすいですねー。	Hey, there! There aren't many people here in Tokushima so it's very nice to live here.	y
person 2	そうなんだ？わたしは生まれも育ちも兵庫で、今、神戸市に住んでるんだけど、神戸は昔から人が多いよ。	Oh yeah? I was born and raised in Hyogo and I live in Kobe at the moment, but Kobe is always packed.	y
person 1	神戸は、関東で言うところの横浜みたいに栄えてるからね。あ、徳島でも阿波おどりの時だけは別よ？	Kobe is like an equivalent of Yokohama in the Kanto region, you know. Oh, but it's different in Tokushima during the Awa odori event.	y
person 2	ああ、阿波踊りの時は、本当にたくさんの人が集まるらしいね！通訳の仕事をしているんだけど、外国人のお客さんに、阿波踊りについてはよく質問されるよ。	Right. I hear so many people come to visit there during Awa odori event! I work as a translator, and I often get asked about Awa Odori from foreign tourists.	y
person 1	そうそう、すごい人！今年、徳島に移住してきて初めて経験したけど、人混みが苦手なわたしには恐怖だったわ！	Yep, yep. So many people come here! I had my first Awa Odori experience after I moved here this year, and it was very scary since I'm no good with crowds!	y
person 2	人混み苦手なんだ～。そりゃもみくちゃにされたら、恐怖だろうなぁ。わたしはじっとしてることが苦手だから、阿波踊りはいつか参加してみたいんだ。	Oh, you're not good with crowds, huh? Yeah, I bet it'll be scary if you were swarmed by the crowds. As for me, I can't keep stay still so I actually want to participate in Awa odori one day.	y
person 1	そうなのね。それじゃ、こっちに来たときは、ぜひ連絡して！ドライブしながら、あちこち案内してあげるよ。	I see. Well, make sure to let me know when you come here then! I'll take you on a drive and guide you around the place.	y
person 2	本当？それは助かるなぁ。海外旅行はよくするんだけど、国内旅行ってあんまりしてこなかったから、今度は徳島に旅行に行こう！	Really? That'll help a lot. I travel overseas often, but I haven't domestically traveled around much, so I'll visit Tokushima when I get a chance!	y
person 1	うん、絶対来てね。でも、通訳なんてスゴイ仕事だけど、自営って感じなの？	Yeah, you should totally visit here. Anyway, being an interpreter is an impressive job. Are you self-employed?	y
person 2	うん。神戸だったら、自営でも、海外のお客さんは結構来るんだよ。まぁ、最近は海外旅行者が減ってしまって寂しいけどね。	Yep. In Kobe, I still get a lot of overseas clients even if I'm self-employed. Well, I gotta say that it's been quiet without overseas tourists lately.	y
person 1	そっか、それは寂しいし、仕事が少ないのも困るよね。もし仕事の幅を広げるとか考えてるなら、キャリアコンサルのわたしに相談してよ！	I see. That does sound sad and you must be troubled by not having much work, huh? If you're thinking about expanding your skills, you can talk to me about it! I'm a career consultant!	y
person 2	おお！キャリアコンサルタントだったんだね！頼もしいなぁ。その時は是非頼むよ。	Oh! You are a career consultant, huh! That's great to hear. I'll take up on that offer, then.	y
