# Supplementary material
Source: ML conference proceedings conference paper supplement (https://aclanthology.org/2022.eval4nlp-1.9)
Supplement: SupplementaryMaterial [file 0131.xlsx]

## Sheet: Sheet1
person	source	translation	evaluation: is this a good translation?
person 1	どうもー！徳島って人が少なくて、なんだか、とっても過ごしやすいですねー。	Thank you very much, but it's not that easy to spend much time with people like you.	n
person 2	そうなんだ？わたしは生まれも育ちも兵庫で、今、神戸市に住んでるんだけど、神戸は昔から人が多いよ。	You know, I grew up in the armada, and now I live in the armada, and I live in a very long time ago.	n
person 1	神戸は、関東で言うところの横浜みたいに栄えてるからね。あ、徳島でも阿波おどりの時だけは別よ？	The Kawaguchi is like a beach in Kanda-chan, and when you say it's just another surprise, you know?	n
person 2	ああ、阿波踊りの時は、本当にたくさんの人が集まるらしいね！通訳の仕事をしているんだけど、外国人のお客さんに、阿波踊りについてはよく質問されるよ。	Yes, but when the waves are really dancing, there are a lot of people who are really going to ask questions about how many foreigners are going to dance.	n
person 1	そうそう、すごい人！今年、徳島に移住してきて初めて経験したけど、人混みが苦手なわたしには恐怖だったわ！	Yeah, I've never been to the Shibuya islands before, but I've never been so scared of people!	n
person 2	人混み苦手なんだ～。そりゃもみくちゃにされたら、恐怖だろうなぁ。わたしはじっとしてることが苦手だから、阿波踊りはいつか参加してみたいんだ。	I'm not very good at dancing when I'm in the middle of something so scary, you know, I'm scared of dancing, you know?	n
person 1	そうなのね。それじゃ、こっちに来たときは、ぜひ連絡して！ドライブしながら、あちこち案内してあげるよ。	Well, I'd like to show you around when I get there.	n
person 2	本当？それは助かるなぁ。海外旅行はよくするんだけど、国内旅行ってあんまりしてこなかったから、今度は徳島に旅行に行こう！	It's gonna be great, but we haven't been traveling in a long time, so let's go to the island now!	n
person 1	うん、絶対来てね。でも、通訳なんてスゴイ仕事だけど、自営って感じなの？	Yeah, well, it's gonna be great, but it's gonna be really great, really, really, really.	n
person 2	うん。神戸だったら、自営でも、海外のお客さんは結構来るんだよ。まぁ、最近は海外旅行者が減ってしまって寂しいけどね。	Well, if it were God, you'd be glad to visit your own people, but recently, we've been abroad for a while.	n
person 1	そっか、それは寂しいし、仕事が少ないのも困るよね。もし仕事の幅を広げるとか考えてるなら、キャリアコンサルのわたしに相談してよ！	Well, if that's too much of a lonely thing to think about, then I'm going to have a little bit of a hard work to think about, and I'm going to have a little bit of a little chat with the monkey.	n
person 2	おお！キャリアコンサルタントだったんだね！頼もしいなぁ。その時は是非頼むよ。	Oh, that was very nice of you to be a consultant.	n
