# Supplementary material
Source: ML conference proceedings conference paper supplement (https://aclanthology.org/2022.eval4nlp-1.9)
Supplement: SupplementaryMaterial [file 0132.xlsx]

## Sheet: Sheet1
person	source	translation	evaluation: is this a good translation?
person 1	こんにちは～。わたし、本を読むのが趣味なんだけど、あなたは趣味ってある？	Hello, I have a hobby to read, but do you have a hobby to read?	n
person 2	こんにちは！わたしはね、古本屋によく行くほうかなあ。本屋って独特の匂いがすると思わない？	Hey, do you think I should go to the old store and smell strange?	n
person 1	するする！わかる！わたしもね、翻訳家の仕事柄、古本屋にも行かないといけない時があって、よく行くのよ～。	You know, when I go to the old house, I have to go to work, too.	n
person 2	そうなんだ！中には、本屋に行くとトイレに行きたくなるって人もいるけど、あなたもそのタイプ？	Yes, there are people in the bathroom who want to go inside and go to the bathroom, but you too?	n
person 1	いるよね、そういうタイプ！わたしは大丈夫よ！	I'm fine!	n
person 2	わたしも大丈夫！っていうか、むしろ、あの匂いが懐かしく感じるのよねー。学校の教科書とかプリントを思い出すっていうか。	Do I feel like I'm okay with that smell of school book, or do you remember the book?	n
person 1	そうね、たしかに学校のものも、そんな匂いがしてたっけ。学校では図書館に籠って、よくテスト勉強の暗記をしてたわ。わたし、暗記は得意なのよ。	Yes, it smells like school, but I used to read that in the library, and I was in the library studying dark.	n
person 2	すごーい！うらやましい！わたしは勉強が全然駄目だったから、いまは農家をやってるよ。	I'm very good at it now, so I'm very good at it!	n
person 1	農家をしてたんだ？農家って、一日中働いて大変そうだよね。ちゃんと、ごはんとか食べてる？	You're working a farmhouse all day long, aren't you?	n
person 2	食べてる、食べてる！前に有明湾のそばに住んでて、親戚がまだいるから、海苔をいっぱい送ってくれるの。	There's still lots of relatives still living near the Gulf Bay, so I'm eating lots of relatives!	n
person 1	そうなんだ？それは羨ましいな～。わたし、大阪に住んでてたこ焼き作るのが得意なんだけど、海苔は海苔でも、青のりをたっぷりかけて食べるのが好きなの！	I'm very good at living in a giant sea, but I'm very good at it!	n
person 2	青のりも美味しいよね。あなた、人付き合いが苦手なわたしでも、とっても話しやすくて好きよ。	But I like to eat a lot of blue stuff, too, and I like to talk about it so easily.	n
