# Supplementary material
Source: ML conference proceedings conference paper supplement (https://aclanthology.org/2022.eval4nlp-1.9)
Supplement: SupplementaryMaterial [file 0132.xlsx]

## Sheet: Sheet1
person	source	translation	evaluation: is this a good translation?
person 1	こんにちは～。わたし、本を読むのが趣味なんだけど、あなたは趣味ってある？	Hello! My hobby is reading, but do you have a hobby?	y
person 2	こんにちは！わたしはね、古本屋によく行くほうかなあ。本屋って独特の匂いがすると思わない？	Hello! My hobby is to go look around second-hand bookstores. Don't you think bookstores have their distinctive smell?	y
person 1	するする！わかる！わたしもね、翻訳家の仕事柄、古本屋にも行かないといけない時があって、よく行くのよ～。	They do! I know what you mean! I'm a translator so I happen to visit secondhand bookstores often because of my job!	y
person 2	そうなんだ！中には、本屋に行くとトイレに行きたくなるって人もいるけど、あなたもそのタイプ？	Oh, I see! Some people need to go to the bathroom when they get to bookstores, but are you that kind of a person?	y
person 1	いるよね、そういうタイプ！わたしは大丈夫よ！	There are people like that, aren't there? I'm fine!	y
person 2	わたしも大丈夫！っていうか、むしろ、あの匂いが懐かしく感じるのよねー。学校の教科書とかプリントを思い出すっていうか。	Me neither! Rather, that smell makes me feel nostalgic. Kind of reminds me of textbooks or handouts you got in school.	y
person 1	そうね、たしかに学校のものも、そんな匂いがしてたっけ。学校では図書館に籠って、よくテスト勉強の暗記をしてたわ。わたし、暗記は得意なのよ。	You're right. Those papers from school had a kind of smell like that. I used to shut myself up in the library and memorize materials for tests. I'm pretty good at memorizing things.	y
person 2	すごーい！うらやましい！わたしは勉強が全然駄目だったから、いまは農家をやってるよ。	Wow, that's great! I'm jealous! I was no good at studying so I'm a farmer now.	y
person 1	農家をしてたんだ？農家って、一日中働いて大変そうだよね。ちゃんと、ごはんとか食べてる？	Oh, you're farming now? Being a farmer sounds like a tough job, moving around all day. Are you eating properly?	y
person 2	食べてる、食べてる！前に有明湾のそばに住んでて、親戚がまだいるから、海苔をいっぱい送ってくれるの。	I'm eating enough. Don't worry! I used to live near Ariake Bay and my relatives still live there and send me a whole bunch of seaweed.	y
person 1	そうなんだ？それは羨ましいな～。わたし、大阪に住んでてたこ焼き作るのが得意なんだけど、海苔は海苔でも、青のりをたっぷりかけて食べるのが好きなの！	Oh, really? I'm so jealous! I live in Osaka and I am good at making takoyaki. And speaking of seaweed, I love takoyaki with lots of aonori seaweed on top!	y
person 2	青のりも美味しいよね。あなた、人付き合いが苦手なわたしでも、とっても話しやすくて好きよ。	Aonori is also delicious, isn't it? I'm not very good at making friends with people, but I like you, as you're so easy to talk to.	y
