# Supplementary material
Source: ML conference proceedings conference paper supplement (https://aclanthology.org/2022.eval4nlp-1.9)
Supplement: SupplementaryMaterial [file 0133.xlsx]

## Sheet: Sheet1
person	source	translation	evaluation: is this a good translation?
person 1	ねえねえ、あなたって今住んでるところで、生まれ育った？	Hey, did you grow up where you live now?	y
person 2	今住んでるところは違うよ。出身は和歌山なんだ。	I'm not living here right now. I'm from Shikoku.	n
person 1	そうなんだー。わたしは今神戸で、兵庫県以外で暮らしたことがないんだよねー。ほかの県にも住んだことある？	You don't live in the Masaka anymore, do you?	n
person 2	住んだことはないんだけど、アニメの聖地巡礼をよくやってるから、色んな県に行くことはあるよ。	I've lived in many pilgrims, but I'm not going to the pilgrims.	n
person 1	いいなあ！わたし、通訳って職業柄、海外旅行にはよく行くんだけど、考えてみたら、日本のことをあまり知らなくてさあ。	Look, I'm going overseas, but if you don't know a lot about it, I'm going overseas, so try not to think about it.	n
person 2	そうなんだー。でも、わたしも日本のことはよく知らないなぁ。アニメに関係してればわかるんだけどね。	Yeah, but I don't know about Japan too well, and I don't know about it either.	n
person 1	それで十分だよ。だって、海外からしたら、アニメって日本の代名詞みたいなものだと思わない？	So, what if I don't think it's enough for you to think I'm foreign or something?	n
person 2	確かにそうかも。最近は外国人のアニメ友達も増えたしなぁ。その人たちとね、休日に好きなツーリングを楽しんだりもするんだ。	Well, maybe recently, some of the foreigners are getting more popular and more fun with the rest of them.	n
person 1	へえ、活発なんだね！何となくアニメ好きって、インドアなイメージだったよ。	Oh, my God, I love that door!	n
person 2	そう思われがちだよね。でも、仕事も肉体労働だし、結構体は動かす方なんだよね。	Well, it's a lot to think about, but it's better to work, and it's better to keep the body moving.	n
person 1	そうなんだね！わたしもジッとしてられないほうだから、気が合うかもね、わたしたち！	Yeah, well, maybe I can't help it too!	n
person 2	そうだといいなぁ。人からよく、お前マイペースだなって言われてるけど、意外と気が合うのかもね。	Well, I guess that's good for you, Mimieux, 'cause I think you're going to have to be very careful.	n
