# Supplementary material
Source: ML conference proceedings conference paper supplement (https://aclanthology.org/2022.eval4nlp-1.9)
Supplement: SupplementaryMaterial [file 0133.xlsx]

## Sheet: Sheet1
person	source	translation	evaluation: is this a good translation?
person 1	ねえねえ、あなたって今住んでるところで、生まれ育った？	Hey, were you born and raised in the place you're living right now?	y
person 2	今住んでるところは違うよ。出身は和歌山なんだ。	No, the place I'm living is different from the place I was born and raised. I'm from Wakayama originally.	y
person 1	そうなんだー。わたしは今神戸で、兵庫県以外で暮らしたことがないんだよねー。ほかの県にも住んだことある？	Oh, I see. I'm living in Kobe right now and I've never lived outside of Hyogo in my life. Have you lived in other prefectures?	y
person 2	住んだことはないんだけど、アニメの聖地巡礼をよくやってるから、色んな県に行くことはあるよ。	I've never lived in any other prefectures but I tour around real-life anime locations so I do visit other prefectures.	y
person 1	いいなあ！わたし、通訳って職業柄、海外旅行にはよく行くんだけど、考えてみたら、日本のことをあまり知らなくてさあ。	Oh, that's nice! Since I work as an interpreter, I often travel overseas but now that I think about it, I don't know a lot about Japan.	y
person 2	そうなんだー。でも、わたしも日本のことはよく知らないなぁ。アニメに関係してればわかるんだけどね。	I see. But I don't know a lot about Japan either. I do know some things if they're related to anime, though.	y
person 1	それで十分だよ。だって、海外からしたら、アニメって日本の代名詞みたいなものだと思わない？	I think that's enough. Because to people overseas, anime is what represents Japan, don't you think?	y
person 2	確かにそうかも。最近は外国人のアニメ友達も増えたしなぁ。その人たちとね、休日に好きなツーリングを楽しんだりもするんだ。	Yeah, you might be right about that. I have more anime friends from overseas nowadays. I drive around on a motorcycle with them on holidays, which is something I like to do.	y
person 1	へえ、活発なんだね！何となくアニメ好きって、インドアなイメージだったよ。	Oh, you're pretty active, huh! I kind of thought that people who like anime stay indoors.	y
person 2	そう思われがちだよね。でも、仕事も肉体労働だし、結構体は動かす方なんだよね。	I think a lot of people think that way. But I do physical labor for work, so I actually move my body a lot.	y
person 1	そうなんだね！わたしもジッとしてられないほうだから、気が合うかもね、わたしたち！	I see! I can't sit around quietly either so maybe we'll get along!	y
person 2	そうだといいなぁ。人からよく、お前マイペースだなって言われてるけど、意外と気が合うのかもね。	I hope so. People often tell me I do things at my own pace, but maybe we do get along.	y
