# Supplementary material
Source: ML conference proceedings conference paper supplement (https://aclanthology.org/2022.eval4nlp-1.9)
Supplement: SupplementaryMaterial [file 0134.xlsx]

## Sheet: Sheet1
person	source	translation	evaluation: is this a good translation?
person 1	やぁ、こんにちは。わたしは農家なんだけど、今年は、米がたくさん実ったよ。	Hello, I'm a farmhouse, but I've seen a lot of rice this year.	y
person 2	こんにちはー。豊作でよかったね！そういうのって、やっぱ、毎年随分違うもの？	- Hello, that was a nice piece of work, isn't it?	n
person 1	そうだね。不作の年もあったよ。冷夏の時とかね。むかし、有明湾の近くに住んでいた時は、寒い夏だったなぁ。	Yes, there was a time when I lived near the bottom of the cold summer and cold summer.	n
person 2	そうだったのかあ。わたしは福島から今のとこに引っ越してきたんだけど、福島は冬に相当寒いよ！でもお米は美味しかった！	Well, I moved from Fukawa now, but the Fukawa islands were so cold in winter!	n
person 1	福島のお米も美味しいよね。わたしもよく食べるよ。	I'm very good at it, too.	n
person 2	でしょー！お米を沢山食べたおかげで、すくすく成長して、背が高くなりすぎちゃったよ。	You ate a lot of rice, and you grow too tall to grow tall.	n
person 1	はっはっはっ、本当だ。のっぽだね。わたしは人付き合いが苦手なんだけど、あなたは親しみやすい人だね。	Yes, it's true, but I don't like people like you.	n
person 2	ありがと。でも目立つのは苦手だから、のっぽは嫌だー。	Thank you very much, but I don't like being so careful.	n
person 1	そうなのかい？のっぽなら、待ち合わせ場所で一発で見つけてもらえるから、良さそうだけどな。古本屋が好きでよく行くが、本棚に埋もれて見えなくなることもなさそうだ。	Well, if you find out where you are, you'll find a place to go, but you'll find a old storeroom, and you'll like it when you get there!	n
person 2	確かにそうかもね！あと、わたしの好きな鳥取砂丘でも、迷子になりにくいかもしれない！	I don't think you'll like it when you get lost in the hills, too.	n
person 1	鳥取砂丘なら、遠くからでも目立つだろうね。良い目印だ。	If it's a birdhouse, it's a long way from home, but it's a good sign.	n
person 2	そうだよね。ものは考えようだね！ありがと、良いこと教えてくれて。	Yes, it's a good idea. Thank you.	n
