# Supplementary material
Source: ML conference proceedings conference paper supplement (https://aclanthology.org/2022.eval4nlp-1.9)
Supplement: SupplementaryMaterial [file 0134.xlsx]

## Sheet: Sheet1
person	source	translation	evaluation: is this a good translation?
person 1	やぁ、こんにちは。わたしは農家なんだけど、今年は、米がたくさん実ったよ。	Oh, hello there. So I'm a farmer and we got a lot of rice crop harvest this year.	y
person 2	こんにちはー。豊作でよかったね！そういうのって、やっぱ、毎年随分違うもの？	Hello! Nice to hear that you had a good harvest! Does that kind of stuff differ every year?	y
person 1	そうだね。不作の年もあったよ。冷夏の時とかね。むかし、有明湾の近くに住んでいた時は、寒い夏だったなぁ。	Yes. There were years that we had poor harvest. Years with cold summers, for example. A long while back, when I used to live near Ariake Bay, there were some cold summers.	y
person 2	そうだったのかあ。わたしは福島から今のとこに引っ越してきたんだけど、福島は冬に相当寒いよ！でもお米は美味しかった！	Oh, I see. I moved from Fukushima to my current place, but Fukushima is really cold during the winter! The rice from there tasted great, though!	y
person 1	福島のお米も美味しいよね。わたしもよく食べるよ。	The rice from Fukushima is tasty, too. I have them often.	y
person 2	でしょー！お米を沢山食べたおかげで、すくすく成長して、背が高くなりすぎちゃったよ。	Right? Thanks to eating so much rice, I grew so much and I'm too tall now.	y
person 1	はっはっはっ、本当だ。のっぽだね。わたしは人付き合いが苦手なんだけど、あなたは親しみやすい人だね。	Hahaha! True that. You're really tall. I'm not too good at making new friends, but you're an amiable person.	y
person 2	ありがと。でも目立つのは苦手だから、のっぽは嫌だー。	Thanks. But I don't want to stand out so much so it's not great to be tall.	y
person 1	そうなのかい？のっぽなら、待ち合わせ場所で一発で見つけてもらえるから、良さそうだけどな。古本屋が好きでよく行くが、本棚に埋もれて見えなくなることもなさそうだ。	Oh yeah? If you're tall, people can find you easily at a meet-up place, so I don't think it's too bad. I often visit secondhand bookstores because I like them, but I won't have my view blocked by the bookshelves if I was tall.	y
person 2	確かにそうかもね！あと、わたしの好きな鳥取砂丘でも、迷子になりにくいかもしれない！	Yeah, you're right! Oh, also it might help me not get lost in my favourite Tottori dunes!	y
person 1	鳥取砂丘なら、遠くからでも目立つだろうね。良い目印だ。	If you're in the Tottori Sand Dunes, I bet you'll stand out. You'll be a good landmark.	y
person 2	そうだよね。ものは考えようだね！ありがと、良いこと教えてくれて。	Right. I suppose it depends on how you look at it! Thanks for telling me about something positive.	y
