# Supplementary material
Source: ML conference proceedings conference paper supplement (https://aclanthology.org/2022.eval4nlp-1.9)
Supplement: SupplementaryMaterial [file 0135.xlsx]

## Sheet: Sheet1
person	source	translation	evaluation: is this a good translation?
person 1	どうもどうも。いやあ、昨日は仕事に遅刻しそうで、まじ焦ったわ！	Hey, man. I was almost late to work yesterday and boy, did I panic?	y
person 2	どうしたの？何かあったの？	Why? What happened?	y
person 1	それがさあ、映画「君の名は」に出てる歩道橋を見に行ってたら、ついつい時間経つのを忘れちゃってね。危うく建設現場に入る時刻を過ぎるところだったよ。	Well, I went to see this pedestrian bridge that appears in the movie "Your Name," and I totally forgot how much time has passed. I nearly missed the time limit to clock-in to my work.	y
person 2	あはは！それで遅刻しそうだったのか～。わたしはサイクリングが好きで、職場にも自転車通勤しているけど、道を間違えて遅刻しそうになったことはあったな。	Hahaha! So that's why you were almost late, huh? I like riding on my bike so I cycle to work, and there was one time I almost got late because I took the wrong route.	y
person 1	自転車にのるんだね。わたしはバイクでツーリングによく行くよ。	You ride a bike, huh? I drive around on my motorcycle often.	y
person 2	ツーリングということは、旅行にも行ったりする？国内旅行はよく行くんだけど、住んでいる島根県以外で、おすすめのところがあったら、教えてほしいんだ。	Motorcycle, eh? Does that mean you travel around too? I travel a lot within the country, but let me know if there's any place you recommend outside of Shimane, where I live.	y
person 1	それじゃ、わたしの出身地の和歌山をオススメするよ。あそこは空気も美味しいし、最高だと思う！	Well then, I recommend Wakayama where I came from. The air is clean and fresh so I think it'll be awesome!	y
person 2	和歌山かぁ。そこは行ったことがないから、今度、ぜひ行かせてもらうよ。男一人旅、自由気ままに行けるしね。	Wakayama, huh. I've never been there before so I'll definitely visit there next time. I'll be able to travel freely since I'm a dude traveling alone.	y
person 1	それそれ！やっぱりさあ、気ままに旅したいよね。友達と旅すると、お前マイペース過ぎって言われて、いつも最後の方は険悪なムードになるんだ。	Yeah, I know, right! It's nice to travel in a way you want to. When I travel with my friends, they tell me that I'm too self-centered, and they get in a bad mood by the end of the trip.	y
person 2	わかるわかる。マイペースだと、周りのことを気にかけるのは大変だからね。わたしも、それで一人なんだ。	I get what you mean. When you do things at your own pace, it's hard to be considerate of others. That's why I'm alone, too.	y
person 1	おお、同類よ！あなたとは、もっと色々お話してみたいな！	Ah! Kindred spirit! I want to talk to you more about things!	y
person 2	そうだね！わたしも、あなたともっと話をしてみたいと思っているよ。また今度お話ししよう。	Yeah! I want to talk more with you, too! Let's meet up again and have a talk.	y
