# Supplementary material
Source: ML conference proceedings conference paper supplement (https://aclanthology.org/2022.eval4nlp-1.9)
Supplement: SupplementaryMaterial [file 0135.xlsx]

## Sheet: Sheet1
person	source	translation	evaluation: is this a good translation?
person 1	どうもどうも。いやあ、昨日は仕事に遅刻しそうで、まじ焦ったわ！	Thank you, I'm late for work yesterday!	n
person 2	どうしたの？何かあったの？	What's going on?	y
person 1	それがさあ、映画「君の名は」に出てる歩道橋を見に行ってたら、ついつい時間経つのを忘れちゃってね。危うく建設現場に入る時刻を過ぎるところだったよ。	I don't know. When it went to the movies, your name was going to be in the middle of a construction site, and it was too late to oversee time.	n
person 2	あはは！それで遅刻しそうだったのか～。わたしはサイクリングが好きで、職場にも自転車通勤しているけど、道を間違えて遅刻しそうになったことはあったな。	Well, it was too late for me to go into work at the time when I was late, too late to work at the time!	n
person 1	自転車にのるんだね。わたしはバイクでツーリングによく行くよ。	You're gonna ride a bike, I'm gonna go to the Turks.	n
person 2	ツーリングということは、旅行にも行ったりする？国内旅行はよく行くんだけど、住んでいる島根県以外で、おすすめのところがあったら、教えてほしいんだ。	So, if you want to go on a trip, you can go on a trip to the Shibuya State, but if you want to live on a beach island, you can tell me where you live.	n
person 1	それじゃ、わたしの出身地の和歌山をオススメするよ。あそこは空気も美味しいし、最高だと思う！	I think it's the best place for me to sing in the mountains.	n
person 2	和歌山かぁ。そこは行ったことがないから、今度、ぜひ行かせてもらうよ。男一人旅、自由気ままに行けるしね。	I've never been there before, so I'll let you go now and let me go free.	n
person 1	それそれ！やっぱりさあ、気ままに旅したいよね。友達と旅すると、お前マイペース過ぎって言われて、いつも最後の方は険悪なムードになるんだ。	Now, that's the last time I want to travel with you, Miriam!	n
person 2	わかるわかる。マイペースだと、周りのことを気にかけるのは大変だからね。わたしも、それで一人なんだ。	I know it's gonna take a lot of time, so I'm alone too.	n
person 1	おお、同類よ！あなたとは、もっと色々お話してみたいな！	Oh, I'd like to talk to you more!	n
person 2	そうだね！わたしも、あなたともっと話をしてみたいと思っているよ。また今度お話ししよう。	Yes, I'd like to talk to you again.	n
