# Supplementary material
Source: ML conference proceedings conference paper supplement (https://aclanthology.org/2022.eval4nlp-1.9)
Supplement: SupplementaryMaterial [file 0136.xlsx]

## Sheet: Sheet1
person	source	translation	evaluation: is this a good translation?
person 1	こんにちは。わたし、目立ってます？身長高いと目立つので、困るんですよね。	Hello. Am I standing out? People notice you when you're tall and that's a bit troubling for me.	y
person 2	こんにちは。うーん！目立つと何か困るんですか？	Hello. Hmm! What's so troubling about standing out?	y
person 1	視線を集めているような気がしてしまって。たぶん見られているというのが嫌なんでしょうね。とにかく苦手なんです。	I feel like I'm getting a lot of attention on myself. I think I don't like being looked at. I just don't like it.	y
person 2	ああ、その気持ちは、女性として痛いほど分かります。わたしの場合は、縦じゃなくて横に大きいので、そういう意味で、人にチラチラ見られたりするんですよ。	I see. I really understand what you mean as a woman. In my case, I'm not tall but I'm wide, so I feel as if people keep on glancing at me for that.	n
person 1	お互い、大変ですね。あぁ、鳥取砂丘のような人がほとんどいない所へ行きたい。あ、鳥取砂丘、わたしのお気に入りなんです。	We both have our own problems, don't we? Sigh, I wish I can go to a place like Tottori Sand Dunes where there are barely any people. Oh, Tottori dunes are my favorite.	y
person 2	鳥取砂丘ですか。一度も行ったことがないけど、何か美味しい名品とかあるかしらね？	Tottori sand dunes, eh? I've never been there before, but do they have delicious famous food over there?	y
person 1	らっきょうがありますよ！最近福島から引っ越してきたんですが、もっと鳥取砂丘から近いところに住みたかったなぁ。	They got pickled scallions! I've recently moved out of Fukushima, but I wish I moved to a place closer to Tottori dunes.	y
person 2	へえ、らっきょうですか！今度お取り寄せしてみよっと！いまは、職場近くに住んでたりするんですか？	Oh, pickled scallions, huh! I'll try ordering them sometimes! By any chance, are you living close to your workplace right now?	y
person 1	はい。転勤で引っ越すことになったんです。転勤するなら、鳥取にって、前々から夢を見ていたのに、残念です。	Yes. I had to move because of a job transfer. I was hoping I could move to Tottori with the transfer for a long time, but I'm bummed it didn't happen.	y
person 2	あら、ご愁傷さま。わたしの場合は、同人誌を描いているので、好きな場所で仕事ができて幸せかもね。	Oh, that's unfortunate to hear. As for me, I draw and publish fanzines so perhaps I'm fortunate in a sense that I can work from anywhere.	y
person 1	それは幸せですね！わたしも自由に動けるような仕事をすれば良いのか。でも、現実を見ないとだめですね。人から夢見がちとよく言われるので、気を付けてはいるんですが。	That's wonderful! I guess I should do a job that allows me to move around freely. But I gotta be realistic. People tell me I daydream too much, so I try to be careful, though.	y
person 2	でもねえ、ついつい不規則な生活になりがちで、肥満に拍車がかかるから、いけませんね。	But I have to tell you that my lifestyle makes me live in an unorganized way and exacerbates my obesity, so it's not all great.	y
