# Supplementary material
Source: ML conference proceedings conference paper supplement (https://aclanthology.org/2022.eval4nlp-1.9)
Supplement: SupplementaryMaterial [file 0136.xlsx]

## Sheet: Sheet1
person	source	translation	evaluation: is this a good translation?
person 1	こんにちは。わたし、目立ってます？身長高いと目立つので、困るんですよね。	Hello. Am I standing on my height?	n
person 2	こんにちは。うーん！目立つと何か困るんですか？	Hello. What's wrong?	n
person 1	視線を集めているような気がしてしまって。たぶん見られているというのが嫌なんでしょうね。とにかく苦手なんです。	I'm starting to feel like I'm being watched, but maybe I don't like watching.	n
person 2	ああ、その気持ちは、女性として痛いほど分かります。わたしの場合は、縦じゃなくて横に大きいので、そういう意味で、人にチラチラ見られたりするんですよ。	Yeah, well, it's not that big of a mess, but it's not that big of a woman sitting next to me, and it's not that big.	n
person 1	お互い、大変ですね。あぁ、鳥取砂丘のような人がほとんどいない所へ行きたい。あ、鳥取砂丘、わたしのお気に入りなんです。	Oh, my dear, we both love to go somewhere in the hills like a birdhouse.	n
person 2	鳥取砂丘ですか。一度も行ったことがないけど、何か美味しい名品とかあるかしらね？	Have you ever been to a nice place before?	n
person 1	らっきょうがありますよ！最近福島から引っ越してきたんですが、もっと鳥取砂丘から近いところに住みたかったなぁ。	I've been moving from Fukawa for a while now, but I'd like to live closer to the hills.	n
person 2	へえ、らっきょうですか！今度お取り寄せしてみよっと！いまは、職場近くに住んでたりするんですか？	Well, let's take a ride to work this time, shall we?	n
person 1	はい。転勤で引っ越すことになったんです。転勤するなら、鳥取にって、前々から夢を見ていたのに、残念です。	Yes, I'm afraid I've had a bad dream about moving out of the job before I left work.	n
person 2	あら、ご愁傷さま。わたしの場合は、同人誌を描いているので、好きな場所で仕事ができて幸せかもね。	Oh, I'm sorry, but if I'm hurting you, I'd be happy to work in a place where I like to work.	n
person 1	それは幸せですね！わたしも自由に動けるような仕事をすれば良いのか。でも、現実を見ないとだめですね。人から夢見がちとよく言われるので、気を付けてはいるんですが。	I'm happy to do what I have to do, too, but I have to see the real world move.	n
person 2	でもねえ、ついつい不規則な生活になりがちで、肥満に拍車がかかるから、いけませんね。	But I have to tell you, it's a lot of agricultural rules, so I'm afraid, because I have to be careful.	n
