# Supplementary material
Source: ML conference proceedings conference paper supplement (https://aclanthology.org/2022.eval4nlp-1.9)
Supplement: SupplementaryMaterial [file 0136.xlsx]

## Sheet: Sheet1
person	source	translation	evaluation: is this a good translation?
person 1	lets get to know each other	お互いを知りたい	n
person 2	of course . my name is jim . i have 3 other brothers . what about you ?	もちろんジム 3 人の兄弟がいるんだ君は ？	n
person 1	i am tammy . i have no brothers or sisters , but i did just get engaged	私は弟でも姉妹でも姉妹でもないけど婚約したの	n
person 2	congratulations . i also draw animated pictures for cartoons . i	おめでとうアニメの写真も描いたわ	n
person 1	that is very cool . i do not draw but i do dance	クールだけど描けないの	n
person 2	i cant dance but i will learn once i get my new home	ダンスはできないけど新しい家に帰ったら教えてあげる	n
person 1	i have been taking dance since i was very little .	小さい頃からダンスをしてたの	y
person 2	you can dance well by now . my mother taught me how to p lay the piano .	ママがピアノを弾く方法を教えてくれた	n
person 1	how artistic . i am looking for a musician to play at my wedding in paris	芸術家の音楽家を探してるんだ結婚式でバンドを探してるんだ	n
person 2	wow . how much is the pay ? help me get out of my apartment .	費用はいくらだ ？	n
person 1	we are paying 2000 but we will not cover travel	2 0 0 0 ドル払うけど旅行はしないわ	n
person 2	well . that would be helpful but the travel expenses are a killer .	それは助かるかもしれないが旅行費は殺人者だ	n
person 1	we are going to hire locally i guess	私たちは普通の仕事をしようとしてる	n
person 2	yes that sounds about right . my mom teaches music	そうだね母は音楽を勉強していた	n
person 1	i do not suppose she lives in paris ?	彼女が住んでないと思う ？	n
person 2	i wish cause that is where i would be . i need me a vacation .	そうしたいんだ休暇が欲しいんだ	n
