# Supplementary material
Source: ML conference proceedings conference paper supplement (https://aclanthology.org/2022.eval4nlp-1.9)
Supplement: SupplementaryMaterial [file 0136.xlsx]

## Sheet: Sheet1
person	source	translation	evaluation: is this a good translation?
person 1	lets get to know each other	自己紹介しあいましょうか。	y
person 2	of course . my name is jim . i have 3 other brothers . what about you ?	もちろん。僕の名前はジム。他に３人の兄弟がいます。あなたは？	y
person 1	i am tammy . i have no brothers or sisters , but i did just get engaged	私はタミーです。きょうだいはいませんが、最近婚約したんですよ。	n
person 2	congratulations . i also draw animated pictures for cartoons . i	おめでとう。それと僕は漫画用のアニメ画を書いているんです。	y
person 1	that is very cool . i do not draw but i do dance	とてもかっこいいですね。 私は絵は描かないけどダンスはします。	y
person 2	i cant dance but i will learn once i get my new home	僕はダンスはできないけど、新居が見つかったら習うつもりです。	y
person 1	i have been taking dance since i was very little .	私はとても小さい頃からダンスを習ってきたんですよ。	y
person 2	you can dance well by now . my mother taught me how to p lay the piano .	今ではダンスが上手になったでしょうね。僕の母はピアノの弾き方を教えてくれました。	y
person 1	how artistic . i am looking for a musician to play at my wedding in paris	芸術的ですね。私はパリでの結婚式で演奏してくれるミュージシャンを探しているところなんです。	y
person 2	wow . how much is the pay ? help me get out of my apartment .	うわー！ギャラはいくらですか？僕をアパートから救い出してくださいよ。	y
person 1	we are paying 2000 but we will not cover travel	2000お支払いするけど、旅費の負担はしないつもりです。	y
person 2	well . that would be helpful but the travel expenses are a killer .	うーん。それは助かりそうだけど、旅費が問題ですね。	y
person 1	we are going to hire locally i guess	きっと現地で頼むことになるでしょう。	y
person 2	yes that sounds about right . my mom teaches music	うん、その方が良いでしょうね。僕の母は音楽を教えているんです。	y
person 1	i do not suppose she lives in paris ?	お母さんはパリに住んでるんじゃないでしょうね。	y
person 2	i wish cause that is where i would be . i need me a vacation .	だったら良いんですけどね、パリは行ってみたい場所ですよ。僕にはバケーションが必要です。	y
