# Supplementary material
Source: ML conference proceedings conference paper supplement (https://aclanthology.org/2022.eval4nlp-1.9)
Supplement: SupplementaryMaterial [file 0137.xlsx]

## Sheet: Sheet1
person	source	translation	evaluation: is this a good translation?
person 1	あ、どうも。お元気してました？	Thank you. How are you?	y
person 2	はい！相変わらず、食べ歩きが好きなので、いっつも食べて歩いて元気いっぱいですよ！	I always love to walk, so much!	n
person 1	それは良かったですね。わたしは子どもの頃から食が細くて太れない体質なので、たくさん食べれる人が羨ましいですよ。	Well, that's good because I've never eaten so much since I was a kid.	n
person 2	そうなんですね。わたしは歩いてるからでしょうか、食べてもスタイルが良いって言われますが、太れない体質っていうのも大変そうですね。	Well, I suppose I'm walking, but I'm not fat enough to eat, and I'm not fat enough.	n
person 1	ええ。とくにわたしは男なので、ひょろひょろだと、女性受けが悪いでしょう？	Oh, I'm sorry, I'm a bad guy, aren't I?	n
person 2	確かに。女性って、ちょっと頼れる感じの体型の人が好きですもんね。でも、細マッチョとか、そんなの贅沢すぎますよね。	I know women like to be a little more confident, but they're too rich to be such a bore.	n
person 1	細マッチョ！男のわたしからしても理想です。サイクリングが好きなんですが、上半身はまったく鍛えられませんからねー。	Because I don't like to be a dick, because I don't really like to be a big fan.	n
person 2	そうですね。サイクリングは足の筋肉ですもんね。わたし、セラピストをしているんですが、体型で悩んでいる方も多いですよ。	Yeah, Cyberdyne is a muscle muscle, but I have a therapist in my body, and I have a lot of stress in my body.	n
person 1	そうだったんですか。セラピストの方は、自分の悩みはご家族に相談することになるんですか？	Is that what your therapist would have done to your family?	n
person 2	はい。とは言っても、私の場合は、なかなか悩みってないですけどね。猫舌で熱いものが苦手なことくらいでしょうか。	Well, if I say yes, my tongue wouldn't be too hot, would it?	n
person 1	おや、可愛らしい悩みですね！こんな話をしていたら、久しぶりに家族に会いたくなりました。旅行ばかりしていないで、たまには島根から実家へ帰省しようかな。	Well, I'd like to talk to you about traveling back to the home of my family for a while.	n
person 2	帰省すれば、ご家族も喜ぶでしょうし、それは良いことだと思いますよ！	I'd be happy to go home too, if it's okay with you.	n
