# Supplementary material
Source: ML conference proceedings conference paper supplement (https://aclanthology.org/2022.eval4nlp-1.9)
Supplement: SupplementaryMaterial [file 0137.xlsx]

## Sheet: Sheet1
person	source	translation	evaluation: is this a good translation?
person 1	thank you for chatting with me ! do you have any hobbies ?	話を聞いてくれてありがとう	n
person 2	video games is one hobbie . also being an amateur cook . how about yourself ?	ビデオゲームはタクシー運転手で素人料理もやる	n
person 1	i spend a lot of time jogging when i am not working as a waitress .	ウェイトレスとして働くのに時間を費やしてきた	n
person 2	well at least your healthy . i try to with the 5 cuisines i know how to cook .	少なくとも健康には ５ 人分は稼げないわ	n
person 1	well , i work at a club in houston so i have to stay fit !	俺は地下クラブで働いてるだから残る必要があるんだ ！	n
person 2	i guess some restaurants are stick and waitress is hard too	レストランには店があるしウェイトレスも多すぎるわ	n
person 1	definitely tired of it . i will be moving to australia to marry my boyfriend .	疲れたわ彼氏と結婚するのに行くわ	n
person 2	oh awesome . i wish i had a boyfriend living alone sucks .	１ 人で生活したいわ	n
person 1	definitely ! which is why i am moving . houston is lonely .	私が動いてるのはベストストンは孤独なのよ	n
person 2	i never been to houston . i am stuck at nasa here in florida .	私はフロリダには行ったことがないわ	n
person 1	i hope all is well for you with the hurricane and everything .	ハリケーンとすべてのために十分であることを願う	n
person 2	yes . it was pretty devastating . but we will pull together and be stronger .	ええとても強力だったでも一緒に強くなっていくわ	n
