# Supplementary material
Source: ML conference proceedings conference paper supplement (https://aclanthology.org/2022.eval4nlp-1.9)
Supplement: SupplementaryMaterial [file 0137.xlsx]

## Sheet: Sheet1
person	source	translation	evaluation: is this a good translation?
person 1	thank you for chatting with me ! do you have any hobbies ?	私とチャットしてくれてありがとう！なにか趣味はありますか？	y
person 2	video games is one hobbie . also being an amateur cook . how about yourself ?	ビデオゲームは趣味のひとつです。それに私はアマチュアシェフです。あなたはどうですか？	y
person 1	i spend a lot of time jogging when i am not working as a waitress .	ウェイトレスとして働いていないときは、よくジョギングをして過ごします。	y
person 2	well at least your healthy . i try to with the 5 cuisines i know how to cook .	じゃあ少なくともあなたは健康なんですね。私も健康を心がけてますよ、調理法を知っている５カ国の料理をしながら。	n
person 1	well , i work at a club in houston so i have to stay fit !	ていうか、私はヒューストンのクラブで働いているので体型を維持しないと！	y
person 2	i guess some restaurants are stick and waitress is hard too	酷いレストランもあると思うし、ウェイトレスも大変ですね。	n
person 1	definitely tired of it . i will be moving to australia to marry my boyfriend .	まじでうんざりです。彼氏と結婚するためにオーストラリアに引っ越す予定なんです。	y
person 2	oh awesome . i wish i had a boyfriend living alone sucks .	あー良いですね。私にも彼氏がいたらなあ。一人暮らしは最悪。	y
person 1	definitely ! which is why i am moving . houston is lonely .	確かに！だから私は引っ越すんです。ヒューストンは孤独な場所だから。	y
person 2	i never been to houston . i am stuck at nasa here in florida .	ヒューストンには一度も行ったことがありません。ここフロリダのNASAから離れられないんですよ。	y
person 1	i hope all is well for you with the hurricane and everything .	ハリケーンとか色々あったけど、あなたはすべて上手くいってるといいんだけど。	n
person 2	yes . it was pretty devastating . but we will pull together and be stronger .	うん。かなり壊滅的でしたね。でもみんな団結してもっと強くなりますよ。	y
