# Supplementary material
Source: ML conference proceedings conference paper supplement (https://aclanthology.org/2022.eval4nlp-1.9)
Supplement: SupplementaryMaterial [file 0137.xlsx]

## Sheet: Sheet1
person	source	translation	evaluation: is this a good translation?
person 1	あ、どうも。お元気してました？	Oh, hello. How've you been?	y
person 2	はい！相変わらず、食べ歩きが好きなので、いっつも食べて歩いて元気いっぱいですよ！	Hi, there! Well, I'm full of energy since I'm eating around the place as usual! It's my favorite thing to do!	y
person 1	それは良かったですね。わたしは子どもの頃から食が細くて太れない体質なので、たくさん食べれる人が羨ましいですよ。	That's good to hear. I've never been able to eat a lot since I was a kid and my body can't seem to gain any weight, so I'm envious of those who can eat a lot.	y
person 2	そうなんですね。わたしは歩いてるからでしょうか、食べてもスタイルが良いって言われますが、太れない体質っていうのも大変そうですね。	I see. Maybe it's because I walk a lot, and people tell me I have a nice physique despite eating a lot. Although, not being able to gain weight sounds tough.	y
person 1	ええ。とくにわたしは男なので、ひょろひょろだと、女性受けが悪いでしょう？	Yeah. Especially because I'm a guy, I won't be popular with women if I'm too thin, you know?	y
person 2	確かに。女性って、ちょっと頼れる感じの体型の人が好きですもんね。でも、細マッチョとか、そんなの贅沢すぎますよね。	You got a point. Women do tend to like people who have physiques that look strong. Nonetheless, they usually want muscular and slender men. Don't you think that's asking too much?	y
person 1	細マッチョ！男のわたしからしても理想です。サイクリングが好きなんですが、上半身はまったく鍛えられませんからねー。	Slender and muscular, huh! That's the ideal even for me as a guy. I love to go cycling, but I can't train my upper body at all that way.	y
person 2	そうですね。サイクリングは足の筋肉ですもんね。わたし、セラピストをしているんですが、体型で悩んでいる方も多いですよ。	Yeah, cycling's for the leg muscles, isn't it? I work as a therapist and I get a lot of clients who are troubled by their body image.	y
person 1	そうだったんですか。セラピストの方は、自分の悩みはご家族に相談することになるんですか？	I see. If a therapist has a problem, do they talk to their family about it?	y
person 2	はい。とは言っても、私の場合は、なかなか悩みってないですけどね。猫舌で熱いものが苦手なことくらいでしょうか。	Yes. But I don't really have many troubles, to be honest. The only one I can think of is how I can't eat food that is too hot. That's about it.	y
person 1	おや、可愛らしい悩みですね！こんな話をしていたら、久しぶりに家族に会いたくなりました。旅行ばかりしていないで、たまには島根から実家へ帰省しようかな。	Oh, that's a small trouble to have, haha! Speaking of which, that makes me want to go see my family for the first time in a while. Maybe I should go back home from Shimane for once, rather than traveling all the time.	y
person 2	帰省すれば、ご家族も喜ぶでしょうし、それは良いことだと思いますよ！	I'm sure your family will be happy to see you come home. I think that'll be a great idea!	y
