# Supplementary material
Source: ML conference proceedings conference paper supplement (https://aclanthology.org/2022.eval4nlp-1.9)
Supplement: SupplementaryMaterial [file 0138.xlsx]

## Sheet: Sheet1
person	source	translation	evaluation: is this a good translation?
person 1	こんにちは、久しぶり！最近お取り寄せにハマってるんだけど、何かおすすめなものってあるー？	Hi! I haven't seen you in a while! I've been really into ordering things from shops lately, but do you have any recommendations?	y
person 2	うーん、お取り寄せって食べ物限定？園芸用品なら、色々、良いものが勧められるんだけど。	Hmm, are you ordering food only? I can recommend so many stuff if it's gardening equipment.	y
person 1	なんでもOKよ！不規則な生活してるから、園芸だと、ちゃんと植物のお世話できる自信ないけどね。って、それじゃダメか。	Anything's fine! As my life has been irregular, I'm not confident that I'll be able to take care of plants properly. Well, I guess that isn't an excuse, huh.	y
person 2	あー、それを言う人って多いけど、プランターでもトマトとかちゃんと育つんだよ！	Ah! Well, there are many people who use that as an excuse, but plants like tomatoes can grow properly even in a planter.	y
person 1	そうなの！？それなら、わたしでも育てられそうじゃない！肥満体型なわたしには、トマトってヘルシーだし。	Really!? That sounds like even I could grow them! I'm obese so tomatoes should be healthy for me.	y
person 2	うん、すっごくオススメ。でも、わたしみたいに田舎で暮らして、広い庭で色々やるのが一番かな！	Yeah, I highly recommend it. But I think living out in the country with a large yard like I do is the best way to do gardening!	y
person 1	うんうん、本当は広い庭があると良いんだけどな～。うちの狭さじゃ、ベランダ栽培しかできないわー。	Yeah, I wish I had a large garden myself. But considering how little space I've got, I can only grow plants on the veranda.	y
person 2	そっかあ。わたしさ、狭いところが苦手だから、アパートとかマンションは無理なんだ。	I see. I'm claustrophobic, so I can't live in an apartment or a condo.	y
person 1	そうなの？わたしは、なんでも手に届く範囲においてあった方が落ち着くよ。だから、家も狭いの。って、だから太るのか。	Oh, really? I feel more comfortable having things within reach so that's why my house is compact. I guess that's why I'm fat.	y
person 2	えー、太ってるのって、本人が気にするより、周りは誰も気にしてないものだよ。わたしみたいに大らかに行こうよー	Well, I don't think people care as much about others being fat as the fat people themselves. You should live in a more chilled-out way like me!	y
