# Supplementary material
Source: ML conference proceedings conference paper supplement (https://aclanthology.org/2022.eval4nlp-1.9)
Supplement: SupplementaryMaterial [file 0138.xlsx]

## Sheet: Sheet1
person	source	translation	evaluation: is this a good translation?
person 1	こんにちは、久しぶり！最近お取り寄せにハマってるんだけど、何かおすすめなものってあるー？	Hello, it's been a long time since I've been in charge, but what do you mean?	n
person 2	うーん、お取り寄せって食べ物限定？園芸用品なら、色々、良いものが勧められるんだけど。	Well, if you want some food, I can recommend a lot of supplies.	n
person 1	なんでもOKよ！不規則な生活してるから、園芸だと、ちゃんと植物のお世話できる自信ないけどね。って、それじゃダメか。	It's all right, I can't take care of the vegetable vegetable vegetation, but I can't take care of the vegetable plants.	n
person 2	あー、それを言う人って多いけど、プランターでもトマトとかちゃんと育つんだよ！	Well, I can tell you, there's a lot of people grow tomatoes!	n
person 1	そうなの！？それなら、わたしでも育てられそうじゃない！肥満体型なわたしには、トマトってヘルシーだし。	Well, I'm not being raised, but I'm not being raised to be a fat tomatoes!	n
person 2	うん、すっごくオススメ。でも、わたしみたいに田舎で暮らして、広い庭で色々やるのが一番かな！	Yeah, but I'm going to live in the biggest garden in Oslo!	n
person 1	うんうん、本当は広い庭があると良いんだけどな～。うちの狭さじゃ、ベランダ栽培しかできないわー。	Yeah, actually there's a big garden, but there's only one thing we can grow up in.	n
person 2	そっかあ。わたしさ、狭いところが苦手だから、アパートとかマンションは無理なんだ。	Oh, well, I don't have a very small apartment or a very small apartment.	n
person 1	そうなの？わたしは、なんでも手に届く範囲においてあった方が落ち着くよ。だから、家も狭いの。って、だから太るのか。	Well, I'd be better off being able to reach anything within the range of the house, so that's why I'm getting fat.	n
person 2	えー、太ってるのって、本人が気にするより、周りは誰も気にしてないものだよ。わたしみたいに大らかに行こうよー	I don't care about fat people like us, so let's just go around.	n
