# Supplementary material
Source: ML conference proceedings conference paper supplement (https://aclanthology.org/2022.eval4nlp-1.9)
Supplement: SupplementaryMaterial [file 0138.xlsx]

## Sheet: Sheet1
person	source	translation	evaluation: is this a good translation?
person 1	hi how are you ?	こんにちは、お元気ですか？	y
person 2	hi . i am good . you ?	こんにちは。私は元気です。あなたは？	y
person 1	pretty good as well . what do you do for a living ?	私もまずまず元気です。どんなお仕事をしていますか？	y
person 2	i am a stay at home mom . you ?	私は専業ママなんです。あなたは？	y
person 1	i wish ! i am still looking for a job	羨ましい！私は仕事を探しているんですよ。	y
person 2	oil . that is difficult ! i take car of my kids so not too easy	分かりますよ。それは大変ですよね！私は子供の世話をしているけど、そんなに楽じゃないですよ。	y
person 1	well i take care of my two mustangs if that counts ?	えーと、私は２台のマスタングの手入れをしてますが、それも世話のうちに入るかな？	y
person 2	haha little different . do u need to clothe feed entertain them ?	はは、ちょっと違いますね。車に服を着せたり、ご飯をあげたり、遊んであげたりしなくちゃいけないんですか？	y
person 1	i need to wash , clean , wax , fix , dry , them . its truly a job !	洗って、掃除して、ワックスをかけ、修理して、乾かさないといけないんです。手がかかりますよ！	y
person 2	haha . the worst part for me is grocery shopping for the family	はは。一番厄介なのは家族のために食料の買い出しに行くことです。	y
person 1	haha that sounds like a chore . you sound like a great mom , however !	はは、面倒くさそうですね。でも、あなたは良いお母さんみたいですね！	y
person 2	thanks i am working on starting a vegetarian diet but its difficult !	ありがとう。私はベジタリアンの食生活を始めようとしているんですが、大変ですよ！	n
