# Supplementary material
Source: ML conference proceedings conference paper supplement (https://aclanthology.org/2022.eval4nlp-1.9)
Supplement: SupplementaryMaterial [file 0138.xlsx]

## Sheet: Sheet1
person	source	translation	evaluation: is this a good translation?
person 1	hi how are you ?	元気か ？	y
person 2	hi . i am good . you ?	元気か ？	n
person 1	pretty good as well . what do you do for a living ?	いい家で何をしてるの ？	n
person 2	i am a stay at home mom . you ?	ママの家にいるよ君は ？	y
person 1	i wish ! i am still looking for a job	まだ仕事を探しているんだ	y
person 2	oil . that is difficult ! i take car of my kids so not too easy	石油、それは難しい子供たちの車を取るのは簡単ではない	n
person 1	well i take care of my two mustangs if that counts ?	2 つの牛の世話をしてもいいかな ？	n
person 2	haha little different . do u need to clothe feed entertain them ?	（ 哲希 ） おっと違った味がするんじゃねーのか ？	n
person 1	i need to wash , clean , wax , fix , dry , them . its truly a job !	洗濯して洗濯して洗濯して洗濯して掃除しないと本当に仕事なのよ ！	n
person 2	haha . the worst part for me is grocery shopping for the family	そりゃ残念だ家族のために料理店を買ってきてくれて	n
person 1	haha that sounds like a chore . you sound like a great mom , however !	（ 吉森 ） 楽しそうだないい母親みたいだな ！	n
person 2	thanks i am working on starting a vegetarian diet but its difficult !	ベジタリアンのダイエットを始めてくれてありがとうでも大変だわ ！	n
