# Supplementary material
Source: ML conference proceedings conference paper supplement (https://aclanthology.org/2022.eval4nlp-1.9)
Supplement: SupplementaryMaterial [file 0139.xlsx]

## Sheet: Sheet1
person	source	translation	evaluation: is this a good translation?
person 1	こんにちは！ランチで麻婆豆腐を食べたら、豆腐が熱くて舌をヤケドしちゃったわ！	Hi! I was eating mapo tofu for lunch but the tofu was so hot, I burnt my tongue!	n
person 2	そうなんだ。熱いのって、気を付けないとやばいよね。わたしも名古屋めしが好きで、土手鍋食べて、よくやけどする。	Oh, I see. You gotta be careful with hot food, don't you? I love Nagoya cuisine so I eat Dotenabe miso oyster hot pot and I often burn myself, too.	y
person 1	土手鍋、美味しそう！食べ歩きが趣味なんだけど、猫舌だから、色々制限があるのよ。でも土手鍋、食べたいー！	Dotenabe sounds delicious! My hobby is to eat around, but my tongue's sensitive to heat so I have some limitations. But I do want to try Dotenabe!	y
person 2	土手鍋、美味しいよ。愛知で育ったんだけど、小さい頃から食べてるんだ。	Dotenabe is delicious. I grew up in Aichi, so I've been eating it since I was a child.	y
person 1	うらやましい！愛知って、色々美味しいものがたくさんあるよね？	That's nice! Aichi has a lot of delicious food, doesn't it?	y
person 2	うん、あるよ。紹介したいところだけど、人の目を見て話すことが苦手なこんなわたしとでも、話してくれるの？	Yep, we sure do. I wish I could introduce you to some, but I'm not good at making eye contact with others while I talk. Would you still talk to me?	y
person 1	えー！全然気にすること無いよ。わたし、セラピストをやってるせいなのかなあ、人から聞き上手ってよく言われるし、安心して！	Oh! You have nothing to worry about! Maybe it's because I'm a therapist, people tell me that I'm a good listener, so don't worry!	y
person 2	なるほど。どおりで、話しやすいと思った。初対面の人って苦手なはずなのに、あなたは違うから。そんな人もいるんだね。	I see. No wonder I thought you were easy to speak to. I usually don't like talking to people when I meet them for the first time, but you felt different. I guess people like you exist, huh.	y
person 1	わたしだけじゃないよ！世の中には合う人が沢山いると思うから、全然だいじょうぶ！	It's not just me, you know! There are a lot of people who'd get along with you, so you have nothing to worry about!	y
person 2	ありがとう、そういう人に出会えると良いな。プラモデルが趣味なんだけど、そういう人でプラモデル好きだったら、もっと嬉しいな。	Thanks. I hope I get to meet more people like that. My hobby is making plastic models, so if I can meet people who share the same hobby, that'll be even better.	y
person 1	プラモデル？すごい興味ある！わたしでも出来るかな？	Plastic models? I'm intrigued! Do you think I can do it, too?	y
person 2	できると思うよ。今度、わたしのコレクションを紹介しても良いけど。友達になってくれるの？	Sure. I can show you my collection next time, but will you be my friend?	y
