# Supplementary material
Source: ML conference proceedings conference paper supplement (https://aclanthology.org/2022.eval4nlp-1.9)
Supplement: SupplementaryMaterial [file 0139.xlsx]

## Sheet: Sheet1
person	source	translation	evaluation: is this a good translation?
person 1	hi how are you doing today	こんにちは、お元気ですか？	y
person 2	i am great just playing with my parrot	とても元気です、オウムと遊んでたところです。	y
person 1	how old is your parrot	オウムは何歳ですか？	y
person 2	4 year old . he says my mommy does not love me haha	４歳です、「お母さんは僕のことが嫌い」って言うんです、はは。	y
person 1	that is a funny thing to say	おかしなこと言いますね。	n
person 2	i am originally from baton rouge where were you born ?	僕はバトンルージュ出身なんだけど、あなたはどこで生まれたんですか？	y
person 1	maryland . it is beautiful there .	メリーランド。 美しいところですよ。	y
person 2	i have never been there . i am a chef .	行ったことないですね。僕はシェフです。	y
person 1	where do you cook at	どこでお仕事を？	y
person 2	i cook for a caterer . what do you do ?	仕出し屋用に料理をしているんです。あなたのお仕事は？	y
person 1	i work in a hospital	病院で働いています。	y
person 2	i do not work in public because i am embarrassed by my male pattern baldness	僕は男性型脱毛症が恥ずかしいので、公の場では働かないんです。	y
person 1	can you not wear a wig	カツラは被れないんですか？	y
person 2	oh lord no . a toupee ?	とんでもない。付け毛ですか？	y
person 1	why not ? at least you could go out .	どうして？少なくとも外出できるようになるのに。	y
person 2	i just am weird like that i guess . i go out just not a lot .	きっと僕が変わり者なだけでしょうね。外出はするんですが、頻繁ではないだけです。	y
