# Supplementary material
Source: ML conference proceedings conference paper supplement (https://aclanthology.org/2022.eval4nlp-1.9)
Supplement: SupplementaryMaterial [file 0139.xlsx]

## Sheet: Sheet1
person	source	translation	evaluation: is this a good translation?
person 1	hi how are you doing today	今日はどうしてるの ？	n
person 2	i am great just playing with my parrot	I 'm great play with m y paries with m y rot with m y rot	n
person 1	how old is your parrot	何歳なの ？	y
person 2	4 year old . he says my mommy does not love me haha	ママは僕を愛してないと言ってた	n
person 1	that is a funny thing to say	それは面白いことだ	n
person 2	i am originally from baton rouge where were you born ?	私は最初の戦闘機から来たのはどこで生まれたかな ？	n
person 1	maryland . it is beautiful there .	ウエイランドだ美しい所だ	n
person 2	i have never been there . i am a chef .	私はそこには行ったことがない私はシェフだ	n
person 1	where do you cook at	どこで料理してるの ？	y
person 2	i cook for a caterer . what do you do ?	私が料理を作ったのあなたはどうするの ？	n
person 1	i work in a hospital	私は病院で働いています	y
person 2	i do not work in public because i am embarrassed by my male pattern baldness	私は公共の場で働くことはできませんなぜなら私は男性パターンで恥をかかせているからです	n
person 1	can you not wear a wig	あなたはカツラを履くことはできません	n
person 2	oh lord no . a toupee ?	ああ、いや、いや、小便か ？	n
person 1	why not ? at least you could go out .	出て行ってもいいのよ	n
person 2	i just am weird like that i guess . i go out just not a lot .	変な感じだけどあまり出られないわ	n
