# Supplementary material
Source: ML conference proceedings conference paper supplement (https://aclanthology.org/2022.eval4nlp-1.9)
Supplement: SupplementaryMaterial [file 0139.xlsx]

## Sheet: Sheet1
person	source	translation	evaluation: is this a good translation?
person 1	こんにちは！ランチで麻婆豆腐を食べたら、豆腐が熱くて舌をヤケドしちゃったわ！	Hey, when I ate a hot tofu, I ate a hot tofu and I ate my tongue!	n
person 2	そうなんだ。熱いのって、気を付けないとやばいよね。わたしも名古屋めしが好きで、土手鍋食べて、よくやけどする。	Yes, it's hot, but I like it when it's hot, and I like it when it comes to food.	n
person 1	土手鍋、美味しそう！食べ歩きが趣味なんだけど、猫舌だから、色々制限があるのよ。でも土手鍋、食べたいー！	But I want to get a lot of delicious food, and I want to take a walk of my own food!	n
person 2	土手鍋、美味しいよ。愛知で育ったんだけど、小さい頃から食べてるんだ。	It's delicious, because I know it's delicious but I love it when I grow up.	n
person 1	うらやましい！愛知って、色々美味しいものがたくさんあるよね？	I'm jealous of lots of good things, aren't I?	n
person 2	うん、あるよ。紹介したいところだけど、人の目を見て話すことが苦手なこんなわたしとでも、話してくれるの？	Yeah, I'd like to introduce you to someone, but I don't like to talk to people like this, do you?	n
person 1	えー！全然気にすること無いよ。わたし、セラピストをやってるせいなのかなあ、人から聞き上手ってよく言われるし、安心して！	I don't care if it's because I'm a good therapist or because I'm better at hearing it from people!	n
person 2	なるほど。どおりで、話しやすいと思った。初対面の人って苦手なはずなのに、あなたは違うから。そんな人もいるんだね。	Well, you know, people don't think you're so easy to talk about, do you?	n
person 1	わたしだけじゃないよ！世の中には合う人が沢山いると思うから、全然だいじょうぶ！	I don't think there's enough people in the world that can fit!	n
person 2	ありがとう、そういう人に出会えると良いな。プラモデルが趣味なんだけど、そういう人でプラモデル好きだったら、もっと嬉しいな。	Thank you very much, but if you like to meet someone like that, I'd be happy to be a model model model.	n
person 1	プラモデル？すごい興味ある！わたしでも出来るかな？	Do I look like I'm a model?	n
person 2	できると思うよ。今度、わたしのコレクションを紹介しても良いけど。友達になってくれるの？	I think you can introduce my collection now, but can I be friends?	n
