# Supplementary material
Source: ML conference proceedings conference paper supplement (https://aclanthology.org/2022.eval4nlp-1.9)
Supplement: SupplementaryMaterial [file 0140.xlsx]

## Sheet: Sheet1
person	source	translation	evaluation: is this a good translation?
person 1	こんにちは～。田舎暮らしが長いけど、今年は暖かくていい気候だね。	Hello, I've lived in a long country, but this year is a nice warm weather.	n
person 2	ほんとだね。とか言って、インドア派のわたしは、いつでも快適な家の中でばかり、過ごしてるんだけどね！	You know, I've spent all my time in a very comfortable house!	n
person 1	そうなんだ～。わたしもね、家の中で過ごすのは好きよ。でも、狭い場所が苦手だから、家は庭付きの吹き抜けのある家に住んでるんだけど。	Yeah, but I don't like to spend much time in a small house, too.	n
person 2	素敵！そういう家で、音楽でもかけながら、ソーイングできたら幸せなんだろうなあ。	I'd be happy if you could sing at such a nice music house.	n
person 1	ソーイングが好きなのー？わたしはガーデニングが趣味よ。	Do you like Sawyer?	n
person 2	ガーデニングも楽しそう！そうそう、この前さ、いつもみたいにミシンかけてたんだけど、、、	Yeah, I always liked him like this before.	n
person 1	うんうん、どうしたの？	Yeah, what's going on?	y
person 2	どうやっても、上糸がつっぱっちゃうんだよねー。でも、機械に疎いから、なにがどうなってるのか、さっぱりで。どうしよー、ミシンが使い物にならない！	I don't know how to use a machine, but I don't know what's going on, because I don't know what's going on!	n
person 1	そんなの、叩いておけばなんとかなるって！って、それは昔のテレビか。わたし、時々適当すぎるのよね。みんなは大らかって言ってくれるけど。	You know, I used to say that if you beat it, it would be too easy sometimes to tell people about the old TV or whatever.	n
person 2	アハハ！叩く！なんか、子供の頃に転校した先の先生もそんなこと言ってたなー。	I used to say that when I was a kid and I was a kid!	n
person 1	そうそう、昔はね、叩けば電化製品なんて直ると思ってたのよ。先生もO型かしら？わたしもO型の大らかタイプなんだけど。	Oh, yes, I used to think it would be easier if you tried it once.	n
person 2	いいよ、その性格。わたしは好き。わたしもO型って言いたいけど、わたしの場合、血液型が分からないから残念！	I don't know if I like that type of blood type too.	n
