# Supplementary material
Source: ML conference proceedings conference paper supplement (https://aclanthology.org/2022.eval4nlp-1.9)
Supplement: SupplementaryMaterial [file 0140.xlsx]

## Sheet: Sheet1
person	source	translation	evaluation: is this a good translation?
person 1	こんにちは～。田舎暮らしが長いけど、今年は暖かくていい気候だね。	Hello! I've been living out in the country for a long while now, and we have nice, warm weather this year.	y
person 2	ほんとだね。とか言って、インドア派のわたしは、いつでも快適な家の中でばかり、過ごしてるんだけどね！	You're right about that. Although, I'm pretty much a hermit so I've been living comfortably inside of my house all the time!	y
person 1	そうなんだ～。わたしもね、家の中で過ごすのは好きよ。でも、狭い場所が苦手だから、家は庭付きの吹き抜けのある家に住んでるんだけど。	Oh, I see. I do like spending time inside the house. But I'm claustrophobic so I live in a house with an atrium and a garden.	y
person 2	素敵！そういう家で、音楽でもかけながら、ソーイングできたら幸せなんだろうなあ。	That sounds lovely! It must be so wonderful if I could sew things while listening to music in a house like that.	y
person 1	ソーイングが好きなのー？わたしはガーデニングが趣味よ。	Do you like sewing? My hobby is gardening.	y
person 2	ガーデニングも楽しそう！そうそう、この前さ、いつもみたいにミシンかけてたんだけど、、、	Gardening sounds like fun! Oh yeah, the other day I was working on the sewing machine as usual and...	y
person 1	うんうん、どうしたの？	Mmhmm, and what happened?	y
person 2	どうやっても、上糸がつっぱっちゃうんだよねー。でも、機械に疎いから、なにがどうなってるのか、さっぱりで。どうしよー、ミシンが使い物にならない！	No matter what I do, the needle thread gets tight. But I'm no good with machines so I have no clue what's wrong with it. I don't know what to do with it! The sewing machine is useless now!	y
person 1	そんなの、叩いておけばなんとかなるって！って、それは昔のテレビか。わたし、時々適当すぎるのよね。みんなは大らかって言ってくれるけど。	You can just slap it to fix it! But I guess that only works on old TVs, huh. I'm a bit too slack sometimes. Although people tell me I'm just laid-back.	y
person 2	アハハ！叩く！なんか、子供の頃に転校した先の先生もそんなこと言ってたなー。	Hahaha! Slap it, huh! I think the teacher at the school I transferred to as a kid said something like that, too.	y
person 1	そうそう、昔はね、叩けば電化製品なんて直ると思ってたのよ。先生もO型かしら？わたしもO型の大らかタイプなんだけど。	Yep. Everyone thought that home appliances would get fixed if you slapped them. Maybe your teacher was blood type O as well? I'm a laid-back blood type O myself.	y
person 2	いいよ、その性格。わたしは好き。わたしもO型って言いたいけど、わたしの場合、血液型が分からないから残念！	I think your personality is great. I like it. I wish I could say I'm an O myself, but I don't know what blood type I am, unfortunately!	y
