# Supplementary material
Source: ML conference proceedings conference paper supplement (https://aclanthology.org/2022.eval4nlp-1.9)
Supplement: SupplementaryMaterial [file 0141.xlsx]

## Sheet: Sheet1
person	source	translation	evaluation: is this a good translation?
person 1	あ、どうも。えっと、すみません、なんか。いや、変なこと言ってるかな、わたし。	Oh, hello. Um, sorry, uh... Am I saying something weird?	y
person 2	うん？どうしたの？	Hm? What's the matter?	y
person 1	あ、すみません。初対面の人と話すと、どうも緊張しちゃって。しかも、人の目を見て話すのも苦手なんです。怒ってます？	Oh, sorry. I just get so nervous when I talk to people I just met. Plus, I'm not good at talking while making eye contact. Are you angry?	y
person 2	怒ってないですよ～。わたし、最近愛媛から転校してきたばかりの中学生なんです。わたしもどちらかと言うと、初対面の人苦手で、まだ友達いないんです。	I'm not angry! I'm a middle school student, and I've just transferred to a new school from Ehime. I'm also not really good at talking to people who I just met so I don't have friends yet.	y
person 1	あ、そうなんだ。友達って、いっぱい必要だと思う？	Oh, I see. Do you think we need a lot of friends?	y
person 2	うーん、わたしの家は母一人子一人の母子家庭なんだけど、やっぱり周りに知り合いが多い方が、暮らしやすいのかもって思ってるよ。	Umm, well, I grew up in a single-mother family and I'm the only child so I think it's easier to live in a community if you know more people in it.	y
person 1	たしかにね。わたしと違って、あなたなら、しっかりしてるし、きっとすぐに友達ができるよ、うん。	You're right. Unlike me, you're mature for your age so I'm sure you'll make new friends soon. Yep.	y
person 2	そうかなぁ？わたしね、よく怖がりって言われて、いじめられるんだよね。暗い場所も苦手だし、ホラー映画も苦手なの。	You think so? People tell me often that I'm a scaredy cat and they bully me for that. I don't like dark places and horror movies either.	y
person 1	そんなの、みんなそうだよ。わたしなんて、愛知で育ったけど、未だに愛知の田舎の方の街灯がない場所は、夜歩けないもん。	Oh, everyone's like that. I grew up in Aichi and I'm too scared to walk at night in the countryside of Aichi, where they have no streetlights.	y
person 2	街灯がないの！？それは困った。わたしも、そんなとこ歩けないよ～。	No streetlights!? Boy, that's a big problem. I wouldn't be able to walk somewhere like that, too!	n
person 1	同じだね。だから、暗くなってきたら、家でプラモデルを作って過ごすのが、わたしの基本スタイルなんだよ。	See, we're the same. That's the reason why I spend time making plastic models when it gets dark. That's my basic lifestyle.	y
person 2	なるほど！それなら、気がまぎれそうだね！わたしも、気を紛らわせられるもの、探してみよう！	I see! That should make you less scared! I'll look for something to take my mind off.	y
