# Supplementary material
Source: ML conference proceedings conference paper supplement (https://aclanthology.org/2022.eval4nlp-1.9)
Supplement: SupplementaryMaterial [file 0141.xlsx]

## Sheet: Sheet1
person	source	translation	evaluation: is this a good translation?
person 1	あ、どうも。えっと、すみません、なんか。いや、変なこと言ってるかな、わたし。	Oh, I'm sorry, I don't know what you're talking about.	n
person 2	うん？どうしたの？	What's going on?	n
person 1	あ、すみません。初対面の人と話すと、どうも緊張しちゃって。しかも、人の目を見て話すのも苦手なんです。怒ってます？	Oh, I'm sorry to interrupt, but I'm nervous to talk to someone, and I don't like to talk to people.	n
person 2	怒ってないですよ～。わたし、最近愛媛から転校してきたばかりの中学生なんです。わたしもどちらかと言うと、初対面の人苦手で、まだ友達いないんです。	I'm not angry, I'm just a schoolgirl who's been out of love lately and I don't even know who I am anymore.	n
person 1	あ、そうなんだ。友達って、いっぱい必要だと思う？	Do you think I need a lot of friends, huh?	n
person 2	うーん、わたしの家は母一人子一人の母子家庭なんだけど、やっぱり周りに知り合いが多い方が、暮らしやすいのかもって思ってるよ。	Well, my mother's home is one of the only children in the house, but I'm sure there's a lot more to live around.	y
person 1	たしかにね。わたしと違って、あなたなら、しっかりしてるし、きっとすぐに友達ができるよ、うん。	Yeah, I'm sure you do, if you think I can do it right now, you can do it right.	n
person 2	そうかなぁ？わたしね、よく怖がりって言われて、いじめられるんだよね。暗い場所も苦手だし、ホラー映画も苦手なの。	Well, I'm scared, and I'm scared, and I don't like horror movies.	n
person 1	そんなの、みんなそうだよ。わたしなんて、愛知で育ったけど、未だに愛知の田舎の方の街灯がない場所は、夜歩けないもん。	Well, I don't know where people love me, but I still love to walk in the middle of the night but I still love the lights.	n
person 2	街灯がないの！？それは困った。わたしも、そんなとこ歩けないよ～。	I can't walk like that, so I can't walk like that.	n
person 1	同じだね。だから、暗くなってきたら、家でプラモデルを作って過ごすのが、わたしの基本スタイルなんだよ。	It's the same way when it gets dark, so it's my basic style to make the Plastics at at home!	y
person 2	なるほど！それなら、気がまぎれそうだね！わたしも、気を紛らわせられるもの、探してみよう！	All right, let's find out what I'm doing!	n
