# Supplementary material
Source: ML conference proceedings conference paper supplement (https://aclanthology.org/2022.eval4nlp-1.9)
Supplement: SupplementaryMaterial [file 0142.xlsx]

## Sheet: Sheet1
person	source	translation	evaluation: is this a good translation?
person 1	おはよう！今日はあいにくの雨だね。まぁインドア派のわたしには、影響ないけどさ。	Morning! Too bad it's raining. Well, I like staying indoors so I'm not affected by it.	y
person 2	おはよ。わたし、今日ボルダリングに行くつもりだったのになあ。雨の日って湿気があるから、やりづらいんだよねー。	Morning. I was supposed to go rock climbing today. It's difficult to do on rainy days because the air gets damp.	y
person 1	そうなんだ。雨の日って、ボルダリングには向かないんだね！知らなかったよ～。	Oh, I see. Rainy days are no good for rock climbing, huh! I didn't know that!	y
person 2	んー、どうだろ？人によるかも。わたしの場合、身体が柔らかいからボルダリングができてるだけで、上手な人は違うかも！	Hmm, well it's not exactly like that. It might depend on the person doing it. As for me, I probably can do it because my body is flexible, so the situation may be different for people who are really good at it.	y
person 1	なるほどね。確かに、身体能力とか才能って人それぞれだもんね！わたしも、機械に弱いし。	I see. You're right, each person has different physical abilities and talents! For example, I'm no good with machines.	n
person 2	そうなの、そうなの！なんとか身体の能力を最大限に引き出したくて、頑張って筋トレしてるんだよ！	Yeah, I know, right! I want to maximize my physical abilities so I'm working out a lot!	y
person 1	すごい！努力家なんだね。わたし、転勤族の家庭で育ってるから、続けて何かをやるっていう癖がなくて。いつも途中で投げ出しちゃうの。	Wow! You're such a hard worker. I grew up in a family that traveled a lot, so I don't have the habit of doing something continuously. I always give up midway.	n
person 2	そういう事あるよ。続かないものは苦手なものって考えたらどう？わたしも、健康に良いっていうビタミン剤を飲んでみたけど、苦くて続かなかったもん！	Sometimes things are like that. Maybe you can think of the things you gave up as something you don't like? I once tried to take vitamins that were supposed to be good for health but they were so bitter, I couldn't keep on taking it!	y
person 1	なるほど、たしかに、好きな手芸は趣味として続いてるし。あきらめも肝心ってことだね！	Yeah, I see. I still do my favourite handcrafting as a hobby. I guess it's important to give things up at times!	y
person 2	そうそう、そういうこと！あ、でも、仕事とかは苦手でもちゃんと続けて行かなくちゃ駄目だよー？	Yes, exactly! Oh, but you should continue doing stuff like work even though you may not like it!	y
person 1	そうだよね。そこはしっかりやらないと！メリハリだよね！頑張ろ！	Yeah. That's something I have to do properly! We gotta have some balance there, don't we? I'll do my best!	y
person 2	うんうん、石の上にも三年って言うしね！お互い頑張ってこ！	Yep, yep. They say, "Perseverance prevails," you know? Let's try our best!	y
