# Supplementary material
Source: ML conference proceedings conference paper supplement (https://aclanthology.org/2022.eval4nlp-1.9)
Supplement: SupplementaryMaterial [file 0142.xlsx]

## Sheet: Sheet1
person	source	translation	evaluation: is this a good translation?
person 1	おはよう！今日はあいにくの雨だね。まぁインドア派のわたしには、影響ないけどさ。	Good morning, I'm afraid it's raining today, but it doesn't affect me.	n
person 2	おはよ。わたし、今日ボルダリングに行くつもりだったのになあ。雨の日って湿気があるから、やりづらいんだよねー。	I was gonna go to the Volturi today because I don't feel like rain today.	n
person 1	そうなんだ。雨の日って、ボルダリングには向かないんだね！知らなかったよ～。	Well, you didn't know the day the sun was supposed to rain ring, did you?	n
person 2	んー、どうだろ？人によるかも。わたしの場合、身体が柔らかいからボルダリングができてるだけで、上手な人は違うかも！	Well, maybe it's just because my body is soft and strong, but it's not the best of the Volturi people!	n
person 1	なるほどね。確かに、身体能力とか才能って人それぞれだもんね！わたしも、機械に弱いし。	Yeah, well, I mean, it's all very talented, and I'm not a machine, and I'm a machine!	n
person 2	そうなの、そうなの！なんとか身体の能力を最大限に引き出したくて、頑張って筋トレしてるんだよ！	Yes, I'm trying to get the full amount of power out of my body, and I'm trying to get the best!	n
person 1	すごい！努力家なんだね。わたし、転勤族の家庭で育ってるから、続けて何かをやるっていう癖がなくて。いつも途中で投げ出しちゃうの。	It's a great house, because I grew up in the middle of a family job, and I don't always get to do anything about it.	n
person 2	そういう事あるよ。続かないものは苦手なものって考えたらどう？わたしも、健康に良いっていうビタミン剤を飲んでみたけど、苦くて続かなかったもん！	I didn't think it would be good if I didn't think it would end badly, but I didn't think it would end well, and I didn't think it would last.	n
person 1	なるほど、たしかに、好きな手芸は趣味として続いてるし。あきらめも肝心ってことだね！	Well, that's exactly what I like to do when I give up my favorite work.	n
person 2	そうそう、そういうこと！あ、でも、仕事とかは苦手でもちゃんと続けて行かなくちゃ駄目だよー？	Yeah, but you have to go to work, don't you?	n
person 1	そうだよね。そこはしっかりやらないと！メリハリだよね！頑張ろ！	Yes, you must do it!	n
person 2	うんうん、石の上にも三年って言うしね！お互い頑張ってこ！	Yes, you must do it on the Stone for three years!	n
