# Supplementary material
Source: ML conference proceedings conference paper supplement (https://aclanthology.org/2022.eval4nlp-1.9)
Supplement: SupplementaryMaterial [file 0143.xlsx]

## Sheet: Sheet1
person	source	translation	evaluation: is this a good translation?
person 1	こんばんは。すっかり暗くなっちゃって、今から帰宅するのが怖いな。	Good evening. It's already so dark outside. I'm scared of going home now.	y
person 2	こんばんは。ほんとですね～。わたしもお酒苦手なのに、友達にお酒に付き合わされちゃって。帰りがこんな時間になってしまいました。	Good evening. Yeah, it is, isn't it? I can't drink any alcohol, but my friends pressured me to go drink with them, and it's so late now.	n
person 1	大人って大変だね。わたし、中学校の放課後学習に行ってたらこんな時間に。お母さん、まだ仕事だろうし、１人で家にいたらお化け出そうで嫌だな！	Being an adult sounds hard. I was attending an after-school class today and it got pretty late. My mom must still be working, and I'm afraid that I might see a ghost if I go home alone!	n
person 2	大人って言っても、わたしも大学生ですから、学生としては一緒ですね！家に帰っても一人って、やっぱり寂しいですよね。	You might think I'm an adult, but I'm still in college, so we are both students! Going home alone does make you feel lonely.	y
person 1	うん。うち、お父さんいないし、兄弟もいないから、家で１人でお留守番なの。	Yeah. I don't have a dad or any siblings, so I'm always staying home alone.	n
person 2	そうなんですか。わたしも福岡の彼女と遠距離恋愛中なので、本当は同棲したいのに、一人暮らしです。	I see. I'm in a long-distance relationship with my girlfriend in Fukuoka, and I want to live with her, but I'm living alone at the moment.	y
person 1	そっかあ。一人暮らしだとさ、ホラー映画とか見たら、眠れなくならない？	I see. Say, if you're living alone, doesn't watching a horror movie make you awake all night?	y
person 2	なりますよ！だから、そういうのは見ないようにして、株取引に集中してるんです。そっちに集中してれば、一人でも大丈夫なので。	It sure does! That's why I try not to watch those things and focus on stock trading. If I focus on that, I'm fine being alone.	y
person 1	そっかあ。わたしもスマホで動物の動画でも見ようかな。テレビ見てると、たまにホラー映画やってたりして、怖いんだよね。	I see. Maybe I'll watch animal videos on my smartphone, too. When I watch the TV, sometimes horror movies come on and that scares me.	n
person 2	そうそう、急にチャンネル変更したときに、怖い映像映ったら嫌ですからね！動物でほっこりしていた方が良いですよ。	I know right. It's terrible if you suddenly change the channels and see scary footage! It's better to feel warm and fuzzy from watching animals.	y
person 1	うん、そうすることにしたよ。あなた、年は離れてるけど、とってもいい人だね。愛媛から転校してきて、友達第一号だよ。	Yeah, I think I'll do that then. You may be much older than I am, but you're such a nice person. You're the first friend I made here since I transferred from Aichi.	y
person 2	本当？骨ばった体型だけど、柔和な性格で、心は優しいって思ってるから、安心して。よし、友達になってあげよう！	Really? I may have a bony body, but I think I have a gentle personality and a kind heart, so don't worry. Sure, I'll be your friend!	y
