# Supplementary material
Source: ML conference proceedings conference paper supplement (https://aclanthology.org/2022.eval4nlp-1.9)
Supplement: SupplementaryMaterial [file 0143.xlsx]

## Sheet: Sheet1
person	source	translation	evaluation: is this a good translation?
person 1	こんばんは。すっかり暗くなっちゃって、今から帰宅するのが怖いな。	Hello, it's getting so dark, I'm afraid I'm going home right now.	y
person 2	こんばんは。ほんとですね～。わたしもお酒苦手なのに、友達にお酒に付き合わされちゃって。帰りがこんな時間になってしまいました。	Good evening, I'm really not very good at drinking too much, and my friends are back at this time.	n
person 1	大人って大変だね。わたし、中学校の放課後学習に行ってたらこんな時間に。お母さん、まだ仕事だろうし、１人で家にいたらお化け出そうで嫌だな！	After school, my mother would still be at work at this time after school!	n
person 2	大人って言っても、わたしも大学生ですから、学生としては一緒ですね！家に帰っても一人って、やっぱり寂しいですよね。	You know, I'm a college student, too, and I miss being home alone.	n
person 1	うん。うち、お父さんいないし、兄弟もいないから、家で１人でお留守番なの。	Yeah, I don't have a brother, so I'm staying at home alone with my brother.	n
person 2	そうなんですか。わたしも福岡の彼女と遠距離恋愛中なので、本当は同棲したいのに、一人暮らしです。	Well, I really want to live with her, too.	n
person 1	そっかあ。一人暮らしだとさ、ホラー映画とか見たら、眠れなくならない？	Well, if I see myself living alone in a horror movie, I can't sleep alone, right?	n
person 2	なりますよ！だから、そういうのは見ないようにして、株取引に集中してるんです。そっちに集中してれば、一人でも大丈夫なので。	So, if you don't look at me like that, you can focus on your shares, but you can focus on your business.	n
person 1	そっかあ。わたしもスマホで動物の動画でも見ようかな。テレビ見てると、たまにホラー映画やってたりして、怖いんだよね。	Yeah, I'm scared of the horror movie, and sometimes I'm scared of watching TV or something.	n
person 2	そうそう、急にチャンネル変更したときに、怖い映像映ったら嫌ですからね！動物でほっこりしていた方が良いですよ。	Yeah, I don't like it when you change your mind when you change your channel.	n
person 1	うん、そうすることにしたよ。あなた、年は離れてるけど、とってもいい人だね。愛媛から転校してきて、友達第一号だよ。	Yeah, well, you're a very old friend, but you've moved away from school for a year.	n
person 2	本当？骨ばった体型だけど、柔和な性格で、心は優しいって思ってるから、安心して。よし、友達になってあげよう！	All right, but I think you're gonna be very kind to me, so I'm gonna give you a hand.	n
