# Supplementary material
Source: ML conference proceedings conference paper supplement (https://aclanthology.org/2022.eval4nlp-1.9)
Supplement: SupplementaryMaterial [file 0144.xlsx]

## Sheet: Sheet1
person	source	translation	evaluation: is this a good translation?
person 1	こんにちは！わたし、以前は高知の大学に通っていたんですが、他にやりたいことがあって、自主退学したんです。	Hi, I've been to high school before, but there's something else I'd like to do, and I've been expelled myself.	n
person 2	こんにちは。やりたいことって何ですか？	Hello. What do you want to do?	y
person 1	好きなボルダリングです！それで、大会に出られるような選手になれるように、集中して取り組もうと思って。	It's Volturi, and I'm trying to concentrate on starting a tournament.	n
person 2	すごーい！チャレンジャーですね。そういう思い切りみたいなのが、わたしにはないところで、魅力的です。	Wow, that's amazing, but it's not me, it's attractive.	n
person 1	いやいや、小さい頃から体が柔らかくてボルダリングはやってたんですけどね。でも、夢が捨てきれなかったんです。	No, no, no, no, no, no, no, no, no, no, no, no, no, no, no, no, no, no, no, no.	n
person 2	夢を追って大学をやめるなんて、勇気がいると思います。わたしなんて、思い切りが足りなくて、ネットオークションになかなか手を出せないでいるんですよ。	I don't think there's enough courage to stop college from thinking that I have enough courage to stop thinking that I have no choice but to get to the Internet.	n
person 1	そうなんですか？でも、ネットオークションって、ちょっと難しい気がしちゃいますもんね。わかるな～。	Do you know how difficult it is to get to the Internet?	n
person 2	でしょ？しかも空気を読むのが苦手なので、いくらぐらいの値をつければいいのか、全然見当もつかないんですよ。	And I'm not good at reading air, so I don't know how much longer I'm good at it.	n
person 1	そうですよね。あれって、周りの出品者とか、世の中の相場とか、色々考えなくっちゃいけないですもんね。わたしも趣味の筋トレグッズ買ってみたいけど、難しそう。	Yeah, well, if you don't think about it, you don't have to think about what I want to buy around the world or what I want to buy.	n
person 2	そうなんです。でも、わたしと同じ京都の大学院の友達は、みんなオークションでお得に色んなのをゲットしてて羨ましくて。	Yes, but my friends from Kyoko get lots of friends at the same school as me.	n
person 1	そうなんですか～。それは羨ましい！わたしも、筋トレグッズのために挑戦してみようかなぁ。	I guess I envy them too, too!	n
person 2	ええ、是非やってみて！それで、コツとかをわたしに教えてください！	Yes, let me tell you something, then!	n
