# Supplementary material
Source: ML conference proceedings conference paper supplement (https://aclanthology.org/2022.eval4nlp-1.9)
Supplement: SupplementaryMaterial [file 0144.xlsx]

## Sheet: Sheet1
person	source	translation	evaluation: is this a good translation?
person 1	こんにちは！わたし、以前は高知の大学に通っていたんですが、他にやりたいことがあって、自主退学したんです。	Hello! I used to attend a university in Kochi, but I dropped out because there was something else I wanted to do.	y
person 2	こんにちは。やりたいことって何ですか？	Hello. What did you want to do?	y
person 1	好きなボルダリングです！それで、大会に出られるような選手になれるように、集中して取り組もうと思って。	Rock climbing that I love! It's what I love to do! I wanted to become a rock-climbing athlete who can enter tournaments, so I thought I should focus on that instead.	n
person 2	すごーい！チャレンジャーですね。そういう思い切りみたいなのが、わたしにはないところで、魅力的です。	Wow! You're quite a daring person. I lack such determination so I find that part of you fascinating .	y
person 1	いやいや、小さい頃から体が柔らかくてボルダリングはやってたんですけどね。でも、夢が捨てきれなかったんです。	Aw, shucks. I started rock climbing when I was a child because my body was flexible. And I just couldn't give up on my dream.	y
person 2	夢を追って大学をやめるなんて、勇気がいると思います。わたしなんて、思い切りが足りなくて、ネットオークションになかなか手を出せないでいるんですよ。	I think you have enough courage to to drop out of university to pursue your dream. As for me, I can't even start online auction because I don't have the drive to commit.	n
person 1	そうなんですか？でも、ネットオークションって、ちょっと難しい気がしちゃいますもんね。わかるな～。	Really? Well, online auctions sound a bit difficult. I can understand.	y
person 2	でしょ？しかも空気を読むのが苦手なので、いくらぐらいの値をつければいいのか、全然見当もつかないんですよ。	Right? Plus, I have a hard time reading the room so, I have no clue what I should set my starting bid at.	n
person 1	そうですよね。あれって、周りの出品者とか、世の中の相場とか、色々考えなくっちゃいけないですもんね。わたしも趣味の筋トレグッズ買ってみたいけど、難しそう。	Yeah. You have to think about other sellers, market prices, and various factors to do it, don't you? I want to buy some weight training equipment for my body, but it looks difficult.	n
person 2	そうなんです。でも、わたしと同じ京都の大学院の友達は、みんなオークションでお得に色んなのをゲットしてて羨ましくて。	Exactly. But all my fellow graduate students in Kyoto usually get lots of stuff at a good price on an online auction, and I'm jealous of them.	y
person 1	そうなんですか～。それは羨ましい！わたしも、筋トレグッズのために挑戦してみようかなぁ。	I see. That would make me jealous too! I might have a go so I can get weight training equipment.	n
person 2	ええ、是非やってみて！それで、コツとかをわたしに教えてください！	Yeah, you should! And when you do, give me some tips on how to do it!	y
