# Supplementary material
Source: ML conference proceedings conference paper supplement (https://aclanthology.org/2022.eval4nlp-1.9)
Supplement: SupplementaryMaterial [file 0145.xlsx]

## Sheet: Sheet1
person	source	translation	evaluation: is this a good translation?
person 1	こんにちは。最近の調子はいかがですか？	Hello. How's your day going?	n
person 2	最近体調を崩しまして、ただいま休職中なんですよ。。	I haven't been feeling well lately, and I'm getting back to work.	y
person 1	それは、大変ですね。どんなお仕事をなさっていたんですか？	That's a tough job. What were you doing?	y
person 2	北陸に住んでいるので、そこの地方銀行で働いていたのですが、地方はいろいろ厳しくて。。	I've worked in the North coast, but that's a lot of pressure.	n
person 1	わかります。わたしも以前宮崎に住んでいたのですが、自然はとても素晴らしいですが苦労も同じくらい多いんですよね。	I've lived in the same country as Morisaki-san before, and I've lived in the same business.	n
person 2	そうですよね。やっぱり都会がいいなってところもありますよね？でもお寿司が好物で、食べ物は地方の方がよかったりもしますよね	Yeah, but you know, there's a good place for a city, but the sushi is better off in town, right?	n
person 1	そうなんですよ、食べ物は本当に地方のほうがおいしいです！でも、わたしは買い物が大好きなので今は都会に引っ越してしまいました。	Yes, but the food is really delicious, so now I'm moving to the city city.	n
person 2	確かに。買い物は都会ですね。わたし黒髪で毛量も多いので、特殊なシャンプー使ってたのですが、地方ではなかなか手に入らなくて。	Well, I have a lot of hair in the city, and I have lots of hair in it, and I have lots of hair in it, and I'm not an expert.	n
person 1	わかります！わたしも長い髪が自慢で、いろいろシャンプーやトリートメントを買って試しているんです。でも、夫はわたしを浪費家だって言うんですよ。	I'm proud to buy a lot of shampoo and a lot of shampoo but I'm proud of my husband.	n
person 2	浪費家だなんて。そんなことないですよね。女は髪が命とかも聞いたこともありますよね？	You've heard of a woman with no hair, no hair, no hair, no hair, no hair?	n
person 1	もちろんです！髪だけじゃなくて、お化粧でもファッションでも、ほかの人に負けたくないからいろいろ買ってしまうんです。	Of course not, because she doesn't want to lose a lot of fashion, because she doesn't want to lose a lot of people.	n
person 2	そのとおり。人に良く見られたいというのはみんなが持っている自然な欲求だと思いますよ。	That's right. We all want to see that nature has its own experience.	n
