# Supplementary material
Source: ML conference proceedings conference paper supplement (https://aclanthology.org/2022.eval4nlp-1.9)
Supplement: SupplementaryMaterial [file 0145.xlsx]

## Sheet: Sheet1
person	source	translation	evaluation: is this a good translation?
person 1	こんにちは。最近の調子はいかがですか？	Hello. How's it going?	y
person 2	最近体調を崩しまして、ただいま休職中なんですよ。。	I haven't been doing well health-wise and I'm currently on leave from work...	y
person 1	それは、大変ですね。どんなお仕事をなさっていたんですか？	Wow, that sounds hard. What were you doing for work?	y
person 2	北陸に住んでいるので、そこの地方銀行で働いていたのですが、地方はいろいろ厳しくて。。	I'm living in the Hokuriku region, and I was working at a local bank, but things were pretty tough in the countryside...	y
person 1	わかります。わたしも以前宮崎に住んでいたのですが、自然はとても素晴らしいですが苦労も同じくらい多いんですよね。	I understand that. I used to live in Miyazaki, and the nature was incredible there, but there was just as much difficulty.	y
person 2	そうですよね。やっぱり都会がいいなってところもありますよね？でもお寿司が好物で、食べ物は地方の方がよかったりもしますよね	I know, right? Sometimes you feel the city life may be better after all. don't you? But sushi's my favorite food, and some times countryside have better food.	y
person 1	そうなんですよ、食べ物は本当に地方のほうがおいしいです！でも、わたしは買い物が大好きなので今は都会に引っ越してしまいました。	Yeah, I agree. I think the food is better in the countryside! But I love shopping, so I've moved to a city now.	y
person 2	確かに。買い物は都会ですね。わたし黒髪で毛量も多いので、特殊なシャンプー使ってたのですが、地方ではなかなか手に入らなくて。	You have a point. The city's great for shopping. I got thick black hair, so I've been using a special shampoo, but I can't get hold of it in the countryside.	y
person 1	わかります！わたしも長い髪が自慢で、いろいろシャンプーやトリートメントを買って試しているんです。でも、夫はわたしを浪費家だって言うんですよ。	I know! I'm proud of my long hair, and I use a bunch of different shampoos and hair treatment products on it. But my husband tells me I'm a spendthrift.	y
person 2	浪費家だなんて。そんなことないですよね。女は髪が命とかも聞いたこともありますよね？	A spendthrift? I don't think so. You've heard of hair being incredibly crucial for women, right?	y
person 1	もちろんです！髪だけじゃなくて、お化粧でもファッションでも、ほかの人に負けたくないからいろいろ買ってしまうんです。	Of course! It's not just the hair. I want to look better than anyone else in terms of make-up and fashion, too, so I happen to buy so many things.	y
person 2	そのとおり。人に良く見られたいというのはみんなが持っている自然な欲求だと思いますよ。	Exactly. I think being perceived as attractive by others is a natural desire that all people have.	y
