# Supplementary material
Source: ML conference proceedings conference paper supplement (https://aclanthology.org/2022.eval4nlp-1.9)
Supplement: SupplementaryMaterial [file 0146.xlsx]

## Sheet: Sheet1
person	source	translation	evaluation: is this a good translation?
person 1	こんにちは。ちょっと相談に乗ってもらっていいですか？	Hello. Could I ask you for advice?	y
person 2	はい、わたしで良ければ相談に乗ります。どんなことでしょうか。	Sure, if you don't mind me giving you one. What's it about?	y
person 1	ありがとうございます。勤めていた会社の社長が変わって方針転換があって、それに合わないなって思い、早期退職に手を挙げて、今は無職なんですよ。今後どんな仕事をすればいいのかなぁって	Thank you. You see, the company I worked for had a change of CEO, and company policies were modified. I felt that the modified policies didn't work well for me so I nominated myself for early retirement and now I'm unemployed. What kind of job do you think I should do now?	y
person 2	それは難しいですね。わたしは、可能な限りの努力はするべきだと思っていますし、実際にそうしてきました。でも、どうしても合わない職場だと続けるのも苦痛ですよね。	That's a difficult situation. I think that one should always do one's best and I have done so throughout my life. But it is tough to work in a company that doesn't suit you.	y
person 1	そうですよね。ちょっと早まったなって気持ちもあって、なかなか次に進めなくて。	I agree. I felt like I rushed myself a little and I can't move on so soon.	y
person 2	何か気分転換をしてみたらどうですか？わたしは料理が好きで、特に餃子作りは気に入っているんです。	How about you do something to refresh yourself? I like to cook, especially making some gyoza dumplings.	y
person 1	料理っていいですよね。作ってるとき、それに没頭できるので頭がスッキリしたりしますよね。やってみようかな。ほかにもオススメあったりします？	Cooking is nice, isn't it? When you focus on cooking, it helps clear your head. Maybe I should try it out. Do you have any other recommendations?	y
person 2	そうですねえ、わたしは関東に住んでいますので、観光地巡りもおすすめです。日光東照宮なんてどうでしょう。	Well, I live in the Kanto region, so I also recommend sightseeing. How about Nikko Tosho-gu?	y
person 1	旅行もいいですね。わたしは西日本に住んでいるので、関東にだとディズニーとかに行ってしまうので、東照宮とかに行ってみるのもよさそうだなぁ	Traveling sounds nice too. I live in western Japan and I tend to go to places like Disney resorts when I visit Kanto, so Tosho-gu sounds a good idea, too.	y
person 2	あとは、成田山新勝寺なんかもわりと有名ですよね。西日本でおすすめの観光地はどんなところがありますか？	Also, Naritasan Shinshoji Temple is rather famous. Do you have any sightseeing recommendations in western Japan?	y
person 1	そうですね。大阪だと大阪城とか新世界とか通天閣とかですかね？ベタすぎますか？	Well, in Osaka there are Osaka Castle, Shinsekai, and Tsutenkaku, I guess? Maybe those places are too cliche?	y
person 2	いえいえ、にぎやかで楽しそうです！お仕事も大変だと思いますけど、気分転換して、少しでも気持ちを楽になさって下さい。	Oh, no. I think they all sound boisterous and fun! I'm sure you're having a hard time finding employment but hope you can do something refreshing and ease your mind, even just a little bit.	y
