# Supplementary material
Source: ML conference proceedings conference paper supplement (https://aclanthology.org/2022.eval4nlp-1.9)
Supplement: SupplementaryMaterial [file 0146.xlsx]

## Sheet: Sheet1
person	source	translation	evaluation: is this a good translation?
person 1	こんにちは。ちょっと相談に乗ってもらっていいですか？	Hello. May I come in and talk to you for a moment?	n
person 2	はい、わたしで良ければ相談に乗ります。どんなことでしょうか。	Yes, if you don't mind, I'd like to talk to you.	n
person 1	ありがとうございます。勤めていた会社の社長が変わって方針転換があって、それに合わないなって思い、早期退職に手を挙げて、今は無職なんですよ。今後どんな仕事をすればいいのかなぁって	Thank you, sir, but I'm starting to think that the company's office has a change of business, and I'm not going to be able to deal with it right now, so I'm going to be able to work as soon as possible.	n
person 2	それは難しいですね。わたしは、可能な限りの努力はするべきだと思っていますし、実際にそうしてきました。でも、どうしても合わない職場だと続けるのも苦痛ですよね。	I'm going to do whatever it takes, but I'm going to do my job as I can, and I'm going to do my job as I can.	n
person 1	そうですよね。ちょっと早まったなって気持ちもあって、なかなか次に進めなくて。	Yeah, well, I feel a little fast, but next time I feel a little fast, I'm not going too fast.	n
person 2	何か気分転換をしてみたらどうですか？わたしは料理が好きで、特に餃子作りは気に入っているんです。	Would you like me to change my mind and make some food, especially if I like to cook?	n
person 1	料理っていいですよね。作ってるとき、それに没頭できるので頭がスッキリしたりしますよね。やってみようかな。ほかにもオススメあったりします？	Well, let's make some food, shall we, in other ways, make some sense?	n
person 2	そうですねえ、わたしは関東に住んでいますので、観光地巡りもおすすめです。日光東照宮なんてどうでしょう。	Well, I live in Uganda, so how about a tour trip to Uganda?	n
person 1	旅行もいいですね。わたしは西日本に住んでいるので、関東にだとディズニーとかに行ってしまうので、東照宮とかに行ってみるのもよさそうだなぁ	I live in the West Japan, so I'll go to Ukrainian, see if I can go to Akasaka and see if I can go to Akasaka or wherever I can go.	n
person 2	あとは、成田山新勝寺なんかもわりと有名ですよね。西日本でおすすめの観光地はどんなところがありますか？	So, what's new in Japan, then?	n
person 1	そうですね。大阪だと大阪城とか新世界とか通天閣とかですかね？ベタすぎますか？	Is it a new castle or a new world?	n
person 2	いえいえ、にぎやかで楽しそうです！お仕事も大変だと思いますけど、気分転換して、少しでも気持ちを楽になさって下さい。	No, it's kind of fun, but it feels like it's a little easier to change a little bit of work.	n
