# Supplementary material
Source: ML conference proceedings conference paper supplement (https://aclanthology.org/2022.eval4nlp-1.9)
Supplement: SupplementaryMaterial [file 0147.xlsx]

## Sheet: Sheet1
person	source	translation	evaluation: is this a good translation?
person 1	お元気でしたか？私は今休職中で、北陸に住んでいるので近場の温泉ばかり行っています。	How are you?	n
person 2	そうなのですね！！私は奈良に在住ですから少し遠いです…	I'm a little far away from Nana!	n
person 1	奈良ですか。たくさん神社や仏閣が会って楽しそうですね。今お仕事は？	Nana and the Fuhrer are having a good time meeting you now, right?	n
person 2	お仕事は今アルバイトでコンビニ定員です。茶髪ですので他で働けるところがなくて	I work for a convenience store, and I don't work anywhere else.	n
person 1	そうなんですか！厳しいですね。外国では鼻ピアスしてる銀行員もいるのにね！わたしは黒髪だけど日本人は黒髪なんて誰が決めたのやら。	You know, there's a lot of people in the country who have a nose in their nose, but I've decided to change my hair, because I'm black hair!	n
person 2	確かの本当にそうですね！でも私は気分屋だからすぐに仕事変えるかも…あなたはなにをしているの？	Who's going to change your mind right now?	n
person 1	脚に怪我をしちゃって歩く仕事なんで働けなくなってお休み中です。北陸なので寿司の食べ歩きとかしてますよ！	I'm going to work on my leg, and I'm going to go to work, and I'm not going to work in the South Coast, so I'm going to go to work.	n
person 2	大丈夫ですか？？それは心配です、お寿司おいしそうですね！私も食べたいです。でも北陸だから方言がすごそうです。	I'm worried about it, but I'd like to eat it, too, because I'm in the North Coast!	n
person 1	はい！加賀百万石の城下町ですが石川弁のいなかっぺです。奈良弁はあるんですか？	Yes, you have a million words to say, don't you?	n
person 2	それは通じなさそうですね、奈良弁というか私は関西弁を話します！	That sounds good to me, Nana!	n
person 1	そうですかあ！わたしは大阪出身の親友がいたので懐かしいなあ。	Well, I miss you so much.	n
person 2	なるほど！今度親友に会うついでにぜひ奈良にも遊びに来てください！	Well, you can come see your best friend next time!	n
