# Supplementary material
Source: ML conference proceedings conference paper supplement (https://aclanthology.org/2022.eval4nlp-1.9)
Supplement: SupplementaryMaterial [file 0147.xlsx]

## Sheet: Sheet1
person	source	translation	evaluation: is this a good translation?
person 1	お元気でしたか？私は今休職中で、北陸に住んでいるので近場の温泉ばかり行っています。	How've you been? I've been taking time off work right now, so I go to the hot springs nearby so often since I'm living in the Hokuriku region.	y
person 2	そうなのですね！！私は奈良に在住ですから少し遠いです…	Oh, I see!! I'm living in Nara so that's a bit too far off for me...	y
person 1	奈良ですか。たくさん神社や仏閣が会って楽しそうですね。今お仕事は？	Nara, huh? It sounds interesting with all those shrines and temples. What are you doing for work right now?	y
person 2	お仕事は今アルバイトでコンビニ定員です。茶髪ですので他で働けるところがなくて	I'm working as a part-time worker at a convenience store right now. I have brown-dyed hair so it's hard to find other places to work.	y
person 1	そうなんですか！厳しいですね。外国では鼻ピアスしてる銀行員もいるのにね！わたしは黒髪だけど日本人は黒髪なんて誰が決めたのやら。	I see! That must be tough! Although, there are even bank tellers with nose piercings overseas! I got black hair, but who the heck decided that Japanese people should have black hair.	y
person 2	確かの本当にそうですね！でも私は気分屋だからすぐに仕事変えるかも…あなたはなにをしているの？	Exactly my point! But I'm temperamental so I might switch jobs again soon... What do you do for work?	y
person 1	脚に怪我をしちゃって歩く仕事なんで働けなくなってお休み中です。北陸なので寿司の食べ歩きとかしてますよ！	My job requires walking, but I injured my legs so I'm taking time off right now. I live in Hokuriku so I'm doing an eating tour of sushi and other cuisines!	n
person 2	大丈夫ですか？？それは心配です、お寿司おいしそうですね！私も食べたいです。でも北陸だから方言がすごそうです。	Are you all right? You must be worried. Sushi sounds delicious! I'd like to have some myself. But I guess the dialect can be very strong in Hokuriku.	y
person 1	はい！加賀百万石の城下町ですが石川弁のいなかっぺです。奈良弁はあるんですか？	Yeah! It's a castle town in the fief of Kaga, but we're all country people speaking with an Ishikawa dialect. Is there a Nara dialect?	y
person 2	それは通じなさそうですね、奈良弁というか私は関西弁を話します！	Oh, then I might not be able to communicate with people. Well, I speak with a Kansai dialect rather than a Nara dialect!	y
person 1	そうですかあ！わたしは大阪出身の親友がいたので懐かしいなあ。	I see! I have a best friend who is from Osaka, so that makes me feel nostalgic.	y
person 2	なるほど！今度親友に会うついでにぜひ奈良にも遊びに来てください！	I see! If you visit your best friend next time, come to Nara as well!	y
