# Supplementary material
Source: ML conference proceedings conference paper supplement (https://aclanthology.org/2022.eval4nlp-1.9)
Supplement: SupplementaryMaterial [file 0148.xlsx]

## Sheet: Sheet1
person	source	translation	evaluation: is this a good translation?
person 1	こんにちは！今日は寒いですね…	Hello, it's cold today.	y
person 2	こんにちは！うちは京都盆地だから底冷えがして、本当に厳しいわ。	Hello, we're in Minamoto, because the bottom is cold and really hard.	n
person 1	なるほど！寒すぎて体が固まりそうよね、わたしは姿勢が余計に悪くなりそう！！	Well, you're too cold and I'm getting worse!	n
person 2	姿勢が悪いと身体に負担がきますよねえ。わたしは最近白髪が多いのが悩みです。	I've had enough of my hair to get better and worse and worse.	n
person 1	白髪はつらいですよね。私はそのようなことを学ぶ大学院を卒業しているので診てあげましょうか？	The hair is hard to learn so much, so can I see you?	n
person 2	そうなんですか！それは是非お願いしたいです。白髪染めも髪が痛むし、トリートメントに変えても結局同じで。どんなお仕事をされてるんですか？	Do you want to change your hair after work, Catherine?	n
person 1	その人に合う合わないがありますもの、仕方ないことです。関東に住んでいるので東京で美容関係の仕事をしています。	I don't know what to do with him, but I live in Tokyo, and I live in Tokyo, and I have to work with the beauty of the beauty of the beauty of the beauty of the beauty.	n
person 2	そうなんですか！東京にはオシャレな人がいっぱいいそうですね。わたしは今婚活中で目鼻立ちははっきりしていて美人だからモテそうなのにと言われてるのに全くダメなんです。	There's a lot of people in Tokyo who are getting married in Tokyo right now because I'm married and I'm very pretty.	n
person 1	ではこの際イメチェンしてみませんか？それか趣味をアピールしてみましょう、わたしですと餃子づくりです。	Do you really think I'm going to be able to tell you that I'm not going to like that, do you?	n
person 2	お！餃子は男子の大好物ですからね。それは参考になります。でもパーティーでいつもいろんな人に優しくして1人もゲットできない八方美人なんですよねえ。	I don't like being a very nice girl, but it's always one of the best girls in the party.	n
