# Supplementary material
Source: ML conference proceedings conference paper supplement (https://aclanthology.org/2022.eval4nlp-1.9)
Supplement: SupplementaryMaterial [file 0148.xlsx]

## Sheet: Sheet1
person	source	translation	evaluation: is this a good translation?
person 1	こんにちは！今日は寒いですね…	Hello! It's cold today, isn't it?	y
person 2	こんにちは！うちは京都盆地だから底冷えがして、本当に厳しいわ。	Hello! My house is in the Kyoto Basin so it's freezing cold. It's so harsh.	y
person 1	なるほど！寒すぎて体が固まりそうよね、わたしは姿勢が余計に悪くなりそう！！	I see! It's so cold that your body feels stiff, doesn't it? I feel like my bad posture may get worse!!	y
person 2	姿勢が悪いと身体に負担がきますよねえ。わたしは最近白髪が多いのが悩みです。	Having a bad posture puts a lot of stress on the body, doesn't it? My problem lately is that I have more grey hair.	y
person 1	白髪はつらいですよね。私はそのようなことを学ぶ大学院を卒業しているので診てあげましょうか？	Having grey hair is pretty tough. I finished graduate school researching matters like that. Do you want me to give you a medical examination?	y
person 2	そうなんですか！それは是非お願いしたいです。白髪染めも髪が痛むし、トリートメントに変えても結局同じで。どんなお仕事をされてるんですか？	Really?! Oh, I definitely would like that! Dying the grey hair damages it, and I've used various hair treatments but to no avail. What kind of job do you do?	y
person 1	その人に合う合わないがありますもの、仕方ないことです。関東に住んでいるので東京で美容関係の仕事をしています。	Products may or may not work depending on each person, so that's, unfortunately, something that happens. I live in the Kanto region, and my job involves the beauty industry.	y
person 2	そうなんですか！東京にはオシャレな人がいっぱいいそうですね。わたしは今婚活中で目鼻立ちははっきりしていて美人だからモテそうなのにと言われてるのに全くダメなんです。	I see! I imagine that there are a lot of fashionable people in Tokyo. I'm on a marriage partner hunting, and people tell me I can get hit on a lot because I'm beautiful with sophisticated facial features, but I've been having zero luck.	y
person 1	ではこの際イメチェンしてみませんか？それか趣味をアピールしてみましょう、わたしですと餃子づくりです。	How about taking this opportunity to do a makeover? Or you can show off your hobbies to your potential partners. As for me, my hobby is making gyoza dumplings.	y
person 2	お！餃子は男子の大好物ですからね。それは参考になります。でもパーティーでいつもいろんな人に優しくして1人もゲットできない八方美人なんですよねえ。	Oh! Gyoza dumplings are boys' favorite food. That's a great tip. But at parties, I'm such a people pleaser who tries to be kind to everyone, so I end up getting no one.	y
