# Supplementary material
Source: ML conference proceedings conference paper supplement (https://aclanthology.org/2022.eval4nlp-1.9)
Supplement: SupplementaryMaterial [file 0149.xlsx]

## Sheet: Sheet1
person	source	translation	evaluation: is this a good translation?
person 1	お元気でしたか？わたしは相変わらず奈良に住んでて毎日、シカにシカせんべいあげてます。	How have you been? I'm still living in Nara and I feed the deer shika senbei every day.	y
person 2	元気モリモリです、鹿ですか、癒されたいです…私は四国に住んでいて大好きなうどんを食べまくる旅をしています。	I've been doing really well. Deers, huh? I wish I could relax... I'm living in Shikoku, and I've been going on an udon eating spree since I love them.	y
person 1	はー！羨ましいです。わたしも香川県うどん巡りしてみたいなあ。でも、高卒で茶髪なんで面接でもチャラいと思われてて就職がなかなかうまくいきません。	Wow! I'm envious of you! I wish I could go on an udon eating tour around Kagawa, too. But I've been having trouble getting employed because of my dyed hair and the interviewers for work think I'm shallow.	y
person 2	私も髪を染めているのでよく怒られます…せっかくのストレートの髪に合っているのに台無しですよね…	I get scolded because I have my hair dyed as well... This color suits my straight hair, but they ruin my looks...	n
person 1	そうなんですか。私生活の方は順調そうですか？	I see. Is your personal life going well?	y
person 2	ひとりでのんびり暮らしています。あなたはどうですか？	I'm living a pretty chilled life alone. How about you?	y
person 1	そうなんですかあ！自由気ままに暮らすのが一番ですよね。わたしもお天気屋なのでなかなか相手が見つからず、しかも関西弁でキツイと言われてしまいます。	I see! It's best to live the way you want to, isn't it? I'm rather temperamental so I've been having a hard time finding a partner, and people tell me that my Kansai dialect is too strong.	n
person 2	そうなんですね！関西弁はいいと思いますけどね、面白みがあって話していると楽しくなります。	I see! I think the Kansai dialect is nice. It sounds interesting, and I have fun talking to people who speak in Kansai dialect.	y
person 1	そういっていただけると嬉しいです。趣味がいっしょの人とか見つかればなあ。あなたは趣味がありますか？	I'm glad to hear you say that. If I could only find a person who shares a common hobby with me. Do you have a hobby?	n
person 2	趣味は鏡を毎日磨くことです。汚れていたら私の大好きなお顔が曇ってしまいますから。	My hobby is to polish my mirrors every day. If they're dirty, my beautiful face will look cloudy on it.	y
person 1	なるほど！それはお祖母ちゃんに言われました。綺麗になりたかったら鏡を磨きなさいって。昔の人の知恵ですよね。	I see! My grandmother used to tell me about that. She said if I wanted to be beautiful, I should polish the mirrors. The elder's wisdom.	y
person 2	昔からの言い伝えは本当に大事です、これからも守っていきましょう。	Old traditions are really important. Let's continue to preserve them.	y
