# Supplementary material
Source: ML conference proceedings conference paper supplement (https://aclanthology.org/2022.eval4nlp-1.9)
Supplement: SupplementaryMaterial [file 0149.xlsx]

## Sheet: Sheet1
person	source	translation	evaluation: is this a good translation?
person 1	お元気でしたか？わたしは相変わらず奈良に住んでて毎日、シカにシカせんべいあげてます。	How are you?	n
person 2	元気モリモリです、鹿ですか、癒されたいです…私は四国に住んでいて大好きなうどんを食べまくる旅をしています。	I live in Nibelungs every day, and I love to spend the rest of my life eating all my country.	n
person 1	はー！羨ましいです。わたしも香川県うどん巡りしてみたいなあ。でも、高卒で茶髪なんで面接でもチャラいと思われてて就職がなかなかうまくいきません。	I'm not sure how much I'd like to spend my entire career in the river, but I'm pretty sure I'd like to spend my whole life studying my hair.	n
person 2	私も髪を染めているのでよく怒られます…せっかくのストレートの髪に合っているのに台無しですよね…	I'm getting pretty pissed at my hair too, so I'm pretty pissed off on straight hair.	n
person 1	そうなんですか。私生活の方は順調そうですか？	How's your personal life going?	n
person 2	ひとりでのんびり暮らしています。あなたはどうですか？	How's your life going?	n
person 1	そうなんですかあ！自由気ままに暮らすのが一番ですよね。わたしもお天気屋なのでなかなか相手が見つからず、しかも関西弁でキツイと言われてしまいます。	Well, I'm the best person to live in the west, and I'm not the best person to be found in the west!	n
person 2	そうなんですね！関西弁はいいと思いますけどね、面白みがあって話していると楽しくなります。	I think there's a good word for it, but I think there's a good story about it.	n
person 1	そういっていただけると嬉しいです。趣味がいっしょの人とか見つかればなあ。あなたは趣味がありますか？	Well, I'm glad you found someone to eat with.	n
person 2	趣味は鏡を毎日磨くことです。汚れていたら私の大好きなお顔が曇ってしまいますから。	Every day I wash my face, if you love it, you'll see my face clouded.	n
person 1	なるほど！それはお祖母ちゃんに言われました。綺麗になりたかったら鏡を磨きなさいって。昔の人の知恵ですよね。	Well, that's what my grandmother told me if you wanted to be beautiful, you'd be old enough to clean up the mirror.	n
person 2	昔からの言い伝えは本当に大事です、これからも守っていきましょう。	Let me tell you something really important from now on.	n
