# Supplementary material
Source: ML conference proceedings conference paper supplement (https://aclanthology.org/2022.eval4nlp-1.9)
Supplement: SupplementaryMaterial [file 0150.xlsx]

## Sheet: Sheet1
person	source	translation	evaluation: is this a good translation?
person 1	こんにちは！最近の調子はいかがですか？	Hello! How have you been lately?	y
person 2	はい、おかげさまで元気ですよ！相変わらず九州に住んでいるので温泉巡りで楽しんでいます。	Hi, I've been well, thanks! I'm still living in Kyushu, and I'm enjoying my trips to different hot springs.	y
person 1	温泉ですか！それは羨ましい、わたしは近畿に住んでいるのであまり温泉に行き機会がないですね。	Hot springs, huh! That's nice. I'm living in the Kinki region, so I don't get so many opportunities to visit the hot springs.	y
person 2	そうなんですか！最近はどんなことにはまっているのですか？	I see! What are you into lately?	y
person 1	最近はオシャレにはまっていて、目鼻立ちがいいのでそれに合ったメイクを研究しています。白髪が目立つのがちょっと困っていますが…	I'm really into fashion right now. I have sophisticated facial features, so I'm learning how to put on make-up that suits my face. Although, my grey hairs are becoming conspicuous, so I'm a bit troubled by them...	n
person 2	目鼻立ちがいいとメイクも映えていいですね。でも白髪は結構皆さん悩んでおられるようですね。わたしはパーマで髪が痛むのが悩みですが。お仕事は順調？	It's nice to have sophisticated facial features since make-up looks even better on them. But pretty much everyone seems to be troubled by grey hair. As for me, I'm troubled by my hair getting damaged through perming. Is your work going well?	n
person 1	髪の痛みはたしかに悩みますよね…大学を卒業したばかりなので、まだ慣れないことが多いです。	Yeah, damaged hair is rather concerning, isn't it...? I just graduated from university, so there are lots of things I'm not used to at work.	y
person 2	そうですか。でも大卒だったら結構会社でもいいポジションにつけそうですよ！わたしは高校を中退したし、鈍感とかKYとか言われて会社でも虐められてますよ！	I see. If you're a university graduate, I'm sure you can get a pretty good position at your workplace! I dropped out of high school, and people bully me, calling me "insensitive" or "can't read the room!"	n
person 1	あら、それは大変だ！でも私も八方美人だとか言われてちょっと避けられたりもします。お互い苦労しかありませんね。	Oh, that's terrible! Well, some people say I'm a people pleaser and they tend to avoid me, too. I suppose we both only have troubles in our lives, huh?	y
person 2	いろんな人に優しくして何が悪いんだ！って思いますよね。わたしも鈍感力っていう打たれ強いとか生命力が強い雑草とかのイメージでポジティブに考えたいです！	You'd think, "What's wrong with being nice to everyone?!" I want to try to take the criticism of being insensitive in a positive light with an image of vigorous weed!	y
