# Supplementary material
Source: ML conference proceedings conference paper supplement (https://aclanthology.org/2022.eval4nlp-1.9)
Supplement: SupplementaryMaterial [file 0150.xlsx]

## Sheet: Sheet1
person	source	translation	evaluation: is this a good translation?
person 1	こんにちは！最近の調子はいかがですか？	Hello, how are you today?	n
person 2	はい、おかげさまで元気ですよ！相変わらず九州に住んでいるので温泉巡りで楽しんでいます。	Yes, I'm very happy to live in Shikoku, because I've always enjoyed it.	n
person 1	温泉ですか！それは羨ましい、わたしは近畿に住んでいるのであまり温泉に行き機会がないですね。	I envy it so much that I don't have much chance to go to the Fountain of Youth!	n
person 2	そうなんですか！最近はどんなことにはまっているのですか？	Well, what's inside of you lately?	n
person 1	最近はオシャレにはまっていて、目鼻立ちがいいのでそれに合ったメイクを研究しています。白髪が目立つのがちょっと困っていますが…	I've been working in Ottsfsfsfsfsfsfsfsfjordur lately, so I'm working with white hair, so I'm having a little bit of a bit of trouble with my hair.	n
person 2	目鼻立ちがいいとメイクも映えていいですね。でも白髪は結構皆さん悩んでおられるようですね。わたしはパーマで髪が痛むのが悩みですが。お仕事は順調？	You guys are having a lot of trouble with my hair, aren't you?	n
person 1	髪の痛みはたしかに悩みますよね…大学を卒業したばかりなので、まだ慣れないことが多いです。	Well, you're still getting a lot of pain in college, aren't you?	n
person 2	そうですか。でも大卒だったら結構会社でもいいポジションにつけそうですよ！わたしは高校を中退したし、鈍感とかKYとか言われて会社でも虐められてますよ！	Well, if I was an old school student, I'd say I was cut off to high school or high school or something!	n
person 1	あら、それは大変だ！でも私も八方美人だとか言われてちょっと避けられたりもします。お互い苦労しかありませんね。	But I'd say that's a little too much for both of us, too.	n
person 2	いろんな人に優しくして何が悪いんだ！って思いますよね。わたしも鈍感力っていう打たれ強いとか生命力が強い雑草とかのイメージでポジティブに考えたいです！	I want to think that I'm a little hard to think about, that I'm a little hard to think about, that I'm a little hard to think about.	n
