# Supplementary material
Source: ML conference proceedings conference paper supplement (https://aclanthology.org/2022.eval4nlp-1.9)
Supplement: SupplementaryMaterial [file 0151.xlsx]

## Sheet: Sheet1
person	source	translation	evaluation: is this a good translation?
person 1	久しぶりですね。お元気でしたか？わたしは四国に住んでいて毎日うどんばかり食べてますよ。	How are you?	n
person 2	うどんはおいしいですよね、わたしは日本を転々としてるから今度行こうかしら…	How are you? It's delicious. I'm going to Japan now.	n
person 1	ぜひ！案内しますよ！ところであなたは髪はストレートですか？私はもうすごく硬い直毛で扱いに困ります。	Can you show me your hair now?	n
person 2	いえ、昔はストレートだったのですが、大学を中退後パーマに変えてしまいました。	No, I used to be straight ahead, but then I changed college after college.	n
person 1	そうなんですか。わたしもパーマにしようかな。とりあえずインパクトを和らげるために髪の毛を染めたりとかはします。お仕事はどういう関係でしたか？	Well, I was thinking that maybe I could help you with the perfect hair or the hair?	n
person 2	思い切って変えると印象変わりますもんね。わたしは今フリーランスで働いています。ころころと転職しがちですけどね。	Well, I'm starting to wonder what it's like to be a free man now, but now I'm starting to think I'm working on a job.	n
person 1	フリーランスと言うと「私失敗しないので」というあの方の印象があります。	And I'm not going to fail him because I'm a free man.	n
person 2	たしかに言われてみるとそうですね、わたしは仕切りたがりだから今の仕事もすぐやめそう、あなたはどう？	Yes, I am, and now I'm done with my job, so how about you stop doing so right now?	n
person 1	独立されて自分の会社を作られるということですね！わたしも大門道子のように自分が大好きなので自分を直接アピールできる作家とかになりたいです。	I want to make my own company as much as I like myself as I can!	n
person 2	作家！あなたにぴったりだと思います、わたしがあなたの最初のファンになるかもしれません！	I think you'll be the first writer in my life!	n
