# Supplementary material
Source: ML conference proceedings conference paper supplement (https://aclanthology.org/2022.eval4nlp-1.9)
Supplement: SupplementaryMaterial [file 0151.xlsx]

## Sheet: Sheet1
person	source	translation	evaluation: is this a good translation?
person 1	久しぶりですね。お元気でしたか？わたしは四国に住んでいて毎日うどんばかり食べてますよ。	I haven't seen you in a while. How have you been? I'm living in the Shikoku region right now and eating udon every day.	y
person 2	うどんはおいしいですよね、わたしは日本を転々としてるから今度行こうかしら…	Udon is delicious, isn't it? I'm traveling all around Japan. Maybe I'll go to Shikoku next...	y
person 1	ぜひ！案内しますよ！ところであなたは髪はストレートですか？私はもうすごく硬い直毛で扱いに困ります。	Oh! I'll show you around! By the way, is your hair straight? My hair is so straight, I have a hard time handling it.	y
person 2	いえ、昔はストレートだったのですが、大学を中退後パーマに変えてしまいました。	No. It used to be straight, but after I dropped out of university, I had it permed.	y
person 1	そうなんですか。わたしもパーマにしようかな。とりあえずインパクトを和らげるために髪の毛を染めたりとかはします。お仕事はどういう関係でしたか？	I see. Maybe I should perm my hair too. For the moment, I'm doing stuff like dying my hair to ease the impact. What kind of job do you do right now?	y
person 2	思い切って変えると印象変わりますもんね。わたしは今フリーランスで働いています。ころころと転職しがちですけどね。	Your impression changes when you decide to transform yourself. I'm currently working as a freelancer. Although, I tend to change my job fairly often.	n
person 1	フリーランスと言うと「私失敗しないので」というあの方の印象があります。	Speaking of freelancers, I'm reminded of that certain someone who says, "I don't fail."	y
person 2	たしかに言われてみるとそうですね、わたしは仕切りたがりだから今の仕事もすぐやめそう、あなたはどう？	You're right, now that you mention it. I like taking charge of things, so I feel like I'll quit my current job soon. How about you?	y
person 1	独立されて自分の会社を作られるということですね！わたしも大門道子のように自分が大好きなので自分を直接アピールできる作家とかになりたいです。	So you mean you're going to become independent and create your own company, huh! I love myself just like Michiko Daimon, so I want to become a writer or have some other job where I can convey my appeal directly to others.	y
person 2	作家！あなたにぴったりだと思います、わたしがあなたの最初のファンになるかもしれません！	Writer, huh! I think that'd be perfect for you. Maybe I'll become your very first fan!	y
