# Supplementary material
Source: ML conference proceedings conference paper supplement (https://aclanthology.org/2022.eval4nlp-1.9)
Supplement: SupplementaryMaterial [file 0151.xlsx]

## Sheet: Sheet1
person	source	translation	evaluation: is this a good translation?
person 1	hey , how s it going tonight ?	こんばんは、調子はどうですか？	y
person 2	hi how are you today	こんにちは、お元気ですか？	y
person 1	i m good , just watching random clips if the voice n youtube	元気です、ユーチューブでザ・ヴォイスの動画を適当に見てました。	y
person 2	wow are you a youtube person	おっ、ユーチューバーなんですか。	y
person 1	i like youtube , but i don t have a channel . i wish	ユーチューブ好きですよ、自分のチャンネルは持っていないんですが、残念ながら。	y
person 2	what else do you do	他に趣味はあるんですか？	y
person 1	i love going to museums when i can	行けるときには博物館に行くのが大好きです。	y
person 2	that does sound like fun really	それは実に楽しそうですね。	y
person 1	my favorite one was probably the believe it or not museum	私のお気に入りは「ビリーブ・イット・オア・ノット博物館」ですかね。	y
person 2	yeah that does sound great	うん、すごく面白そうですね。	y
person 1	what do you like to do ?	ご趣味はなんですか？	y
person 2	i really love video games	ビデオゲームが大好きなんです。	y
person 1	what s your favorite game to play ?	お気に入りのゲームは何ですか？	y
person 2	i would say halo definitely	ヘイローですね、断然。	y
person 1	that s cool , i like destiny	良いですね、私はデスティニーが好きです。	y
person 2	yeah that was made by the same company	うん、それも同じ会社が作ったものですね。	y
