# Supplementary material
Source: ML conference proceedings conference paper supplement (https://aclanthology.org/2022.eval4nlp-1.9)
Supplement: SupplementaryMaterial [file 0151.xlsx]

## Sheet: Sheet1
person	source	translation	evaluation: is this a good translation?
person 1	hey , how s it going tonight ?	今晩はどうだった ？	n
person 2	hi how are you today	やあ今日は	n
person 1	i m good , just watching random clips if the voice n youtube	いいよただ声が録音されたら見てろ	n
person 2	wow are you a youtube person	あなたは素敵な人ね	n
person 1	i like youtube , but i don t have a channel . i wish	チューブチューブが好きだけどチャンネルがないんだ	n
person 2	what else do you do	他にやることは ？	n
person 1	i love going to museums when i can	私ができる限りの博物館に行きたいわ	n
person 2	that does sound like fun really	楽しそうな音だな	n
person 1	my favorite one was probably the believe it or not museum	私のお気に入りはたぶん博物館でもなく	n
person 2	yeah that does sound great	ああいい音だ	n
person 1	what do you like to do ?	どうしたい ？	n
person 2	i really love video games	ビデオゲーム大好き	y
person 1	what s your favorite game to play ?	どんなゲームが好きなんだ ？	y
person 2	i would say halo definitely	絶対に	n
person 1	that s cool , i like destiny	クールな運命が好きなんだ	n
person 2	yeah that was made by the same company	同じ会社で作られたんだ	n
