# Supplementary material
Source: ML conference proceedings conference paper supplement (https://aclanthology.org/2022.eval4nlp-1.9)
Supplement: SupplementaryMaterial [file 0152.xlsx]

## Sheet: Sheet1
person	source	translation	evaluation: is this a good translation?
person 1	こんにちは！最近色々あって大変だ…あなたはどう？	Hi, how are you doing lately?	n
person 2	わたしは新卒で入社したばかりで全然余裕がありません。どんなことがあったんですか？	What happened to me?	n
person 1	高校を中退していました…このままではいけませんよね？ 鈍感ですから今更気づきました。	I was out of high school, so I didn't notice it so easily.	n
person 2	いや、いや。今は学歴なんか通用しない時代です。マイクロソフトのビルゲイツも中退でしょ！今からすぐに自分のしたいことを始めれば問題なしです。	No, no, no, no, no, no, no, no, no, no, no, no, no, no, no, no, no, no, no, no, no, no, no, no, no, no, no, no, no, no, no, no, no, no, no, no, no, no, no, no, no, no, no, no, no, no, no, no, no, no, no, no, no, no, no, no, no, no, no, no, no, no, no, no, no, no, no, no, no, no, no, no, no, no, no, no, no, no, no, no, no, no, no, no, no, no, no, no, no, no, no, no, no, no, no, no, no, no, no, no!	n
person 1	なるほど！少し自信がつきました、実はラーメンが大好きなので専門店を開こうと考えています。		n
person 2	それはグッドアイデア！好きなことで生きるのが一番幸せです。わたしは退屈なコピーや書類づくりの残業で毎日寝不足です。	It's the happiest idea I've ever had to live in my life, and I'm tired of making copies and paperwork every day.	n
person 1	わあ、それは体に悪そうですね、どこに住んでいらっしゃるのですか？	Oh, that's evil, isn't it? Where do you live?	n
person 2	関東の地方都市ですよ。東京まで通うのも一苦労です。あなたは？	It's a city in East India, and you're in a lot of trouble?	n
person 1	オシャレですね！わたし天然パーマだからそれも目立ちそうになくて羨ましい。私は九州です！	I'm a natural, so I'm not jealous of it!	n
person 2	九州はラーメン激戦地じゃないですか！それは腕がなりますね！わたしも我慢強いのだけが取り柄なんで何とか頑張ります。身体に気をつけて頑張ってください！	Shigeru is just a tough fight, and I'm very patient with it!	n
