# Supplementary material
Source: ML conference proceedings conference paper supplement (https://aclanthology.org/2022.eval4nlp-1.9)
Supplement: SupplementaryMaterial [file 0152.xlsx]

## Sheet: Sheet1
person	source	translation	evaluation: is this a good translation?
person 1	こんにちは！最近色々あって大変だ…あなたはどう？	Hello! I'm overwhelmed with so many things happening to me lately... How about you?	y
person 2	わたしは新卒で入社したばかりで全然余裕がありません。どんなことがあったんですか？	I just got employed fresh out of university, and I'm totally overwhelmed. What kind of things happened to you?	y
person 1	高校を中退していました…このままではいけませんよね？ 鈍感ですから今更気づきました。	I dropped out of high school... I can't stay this way, can I? I'm dense so I realized this now.	y
person 2	いや、いや。今は学歴なんか通用しない時代です。マイクロソフトのビルゲイツも中退でしょ！今からすぐに自分のしたいことを始めれば問題なしです。	Oh, no. Nowadays, academic records don't matter. Microsoft's Bill Gates is a drop-out too, isn't he? You won't have any problem if you start doing the things you want to do right now.	y
person 1	なるほど！少し自信がつきました、実はラーメンが大好きなので専門店を開こうと考えています。	I see! I feel a little more confident now. Actually, I really like ramen so I'm thinking about opening up a ramen shop.	y
person 2	それはグッドアイデア！好きなことで生きるのが一番幸せです。わたしは退屈なコピーや書類づくりの残業で毎日寝不足です。	That's a good idea! I think making a living doing what you love is the best thing in the world. I've been sleep-deprived every day from overtime, doing boring things like making copies and paperwork.	y
person 1	わあ、それは体に悪そうですね、どこに住んでいらっしゃるのですか？	Wow, that sounds terrible for the body. Where do you live?	y
person 2	関東の地方都市ですよ。東京まで通うのも一苦労です。あなたは？	I live in a provincial city in Kanto. It's a hassle just to commute to Tokyo. And you?	y
person 1	オシャレですね！わたし天然パーマだからそれも目立ちそうになくて羨ましい。私は九州です！	Wow, that's fashionable! My hair is naturally curly, but if I was there I don't think I'd stand out as much. I'm envious of you. I live in Kyushu!	y
person 2	九州はラーメン激戦地じゃないですか！それは腕がなりますね！わたしも我慢強いのだけが取り柄なんで何とか頑張ります。身体に気をつけて頑張ってください！	Kyushu is a super competitive market for ramen, isn't it! You must be itching to get your hands on it! The only thing that's good about me is being perseverant so I'll endure this somehow. Please take care of yourself and do your best!	n
