# Supplementary material
Source: ML conference proceedings conference paper supplement (https://aclanthology.org/2022.eval4nlp-1.9)
Supplement: SupplementaryMaterial [file 0153.xlsx]

## Sheet: Sheet1
person	source	translation	evaluation: is this a good translation?
person 1	おげんきでしたか？今何をされてますか！	How have you been? What are you doing now?	y
person 2	お久しぶりです、今私はフレックスタイム制の会社で働いています。あなたはいかがですか？	Hi, I haven't seen you in a while, huh. I'm working at a company with a flexitime system. How have you been?	y
person 1	それはすごく進んでる会社ですね！わたしは日本中を転々としているのです。	Oh, that's a progressive company, isn't it! I'm traveling all over Japan.	y
person 2	それは楽しそうですね、わたしの育った寒い地域にはいきましたか？	That sounds fun. Have you visited the cold place where I was raised?	y
person 1	どちらのご出身でしたっけ？	Where are you from again?	y
person 2	北海道のほうでして、牛タンが美味しくて有名な地域です。あなたはどこ出身ですか？	I'm from a place in Hokkaido that's famous for delicious cow tongue. Where are you from?	y
person 1	あのサミットが開かれたところでしょうか！わたしは関西ですが大学を中退してから職を転々として今はフリーランスで働いています。あなたはお仕事は？	Oh, was it the place where the summit was held? I'm from Kansai, and since I dropped out of university, I've been hopping from one job to the next and now work as a freelancer. What do you do for work?	y
person 2	私は中途採用の会社員をしています。フリーランスは大変じゃないですか？	I'm an office worker who was hired mid-career. Isn't freelance life hard?	y
person 1	やっぱり、正社員は安定した収入もあるし、いいですかねえ。でも仕切りたがりであんまり会社では好かれないんです。	I assume being a full-time employee is good because you get a stable income? I like to take charge of things though, so I am often not liked within a company.	y
person 2	頑固者の私には向いていなさそうだ。あらでもそれはリーダーシップがあるってことでいいことですよ。	I don't think it'd suit me since I'm stubborn. Oh, but that's a good thing since it means you have leadership.	y
