# Supplementary material
Source: ML conference proceedings conference paper supplement (https://aclanthology.org/2022.eval4nlp-1.9)
Supplement: SupplementaryMaterial [file 0153.xlsx]

## Sheet: Sheet1
person	source	translation	evaluation: is this a good translation?
person 1	おげんきでしたか？今何をされてますか！	What are you doing now?	n
person 2	お久しぶりです、今私はフレックスタイム制の会社で働いています。あなたはいかがですか？	It's been a long time now. How are you working at Frex's office?	n
person 1	それはすごく進んでる会社ですね！わたしは日本中を転々としているのです。	It's very moving in with us!	n
person 2	それは楽しそうですね、わたしの育った寒い地域にはいきましたか？	That sounds fun. Have you been raised in the cold area where I grew up?	n
person 1	どちらのご出身でしたっけ？	Where were you from?	y
person 2	北海道のほうでして、牛タンが美味しくて有名な地域です。あなたはどこ出身ですか？	Where are you from?	n
person 1	あのサミットが開かれたところでしょうか！わたしは関西ですが大学を中退してから職を転々として今はフリーランスで働いています。あなたはお仕事は？	I am currently working as a free man, but as a free man, I am currently working as a free man.	n
person 2	私は中途採用の会社員をしています。フリーランスは大変じゃないですか？	Am I in the middle of an import job?	n
person 1	やっぱり、正社員は安定した収入もあるし、いいですかねえ。でも仕切りたがりであんまり会社では好かれないんです。	Well, my employees are stabilized, but they didn't like it very much.	n
person 2	頑固者の私には向いていなさそうだ。あらでもそれはリーダーシップがあるってことでいいことですよ。	I'm not a very good person to be a leadership man.	n
