# Supplementary material
Source: ML conference proceedings conference paper supplement (https://aclanthology.org/2022.eval4nlp-1.9)
Supplement: SupplementaryMaterial [file 0154.xlsx]

## Sheet: Sheet1
person	source	translation	evaluation: is this a good translation?
person 1	こんにちは…少し悩みを聞いてもらえませんか？	Hello, could I ask you for advice?	y
person 2	もちろんですよ！どうしたのですか？	Sure! What's the matter?	y
person 1	最近寝不足で…本当に寝れなくて。どうすればいいですかね？	I've been sleep-deprived lately... I really can't go to sleep. What should I do?	y
person 2	それはお気の毒に。いい方法があります。玉ねぎを食べることです！	I'm sorry to hear that. I have a good solution: eat onions!	y
person 1	我慢強い性格が影響したのかも…なるほど、今度食べてみます！そういうことに詳しいのですね！	Maybe my perseverance affected my sleep... I see, I'll give that a try! You're knowledgeable about these things, huh!	y
person 2	いえいえ、私は沖縄県の島人でおじいやおばあがよくそういうことおしえてくれるので！ところで何かリラックスできることしてますか？	Oh, no. I'm an Okinawan islander, and my grandpa and grandma teach me those things a lot! By the way, do you do anything to relax?	y
person 1	特にはしていませんね、でもくせ毛の手入れをしているときがリラックスしているかもしれません。	Not in particular. But I feel comparatively more relaxed when I'm taking care of my curly hair.	y
person 2	なるほど。雨の日なんてちょっと嫌ですね。大泉洋がいじられているのをみて大変だなあって！わたしは大声を出すのがリラックス法で演劇部にいるんですよ！	I see. That must be a bit annoying on rainy days. Whenever I watch Yo Oizumi getting teased about his hair, I'm like, "That must be hard!" Using a loud voice is the way I relax, so I'm in the drama club!	y
person 1	それはすごい！！あなたにぴったりだ、私が住んでいる東日本にもきたことありありますか？	That's great! I think that suits you perfectly. Have you been to Eastern Japan, where I live?	y
person 2	いえ、まだ西日本どまりです！名古屋を超えたことがありません！でも行きたいですね。	No, I've only gotten up to Western Japan! I've never gone further than Nagoya! But I do want to visit there.	y
