# Supplementary material
Source: ML conference proceedings conference paper supplement (https://aclanthology.org/2022.eval4nlp-1.9)
Supplement: SupplementaryMaterial [file 0154.xlsx]

## Sheet: Sheet1
person	source	translation	evaluation: is this a good translation?
person 1	hello . how are you doing this evening ?	今晩はどうですか ？	n
person 2	i am great , how are you ?	元気ですか ？	n
person 1	doing fine . just watching netflix . how about yourself ?	ネットを見てるだけだ自分自身はどうだ ？	n
person 2	just listening to some folk music	音楽を聞くだけだ	n
person 1	nice . do you have a favorite band ?	いいわバンドは好き ？	n
person 2	i like all music genres . do you have a fave ?	音楽が好きなの何か不満は ？	n
person 1	nah i do not have a favorite . it just depends what mood i am in . do you read ?	スザンナはお気に入りじゃない私が感じているものを感じているのかどうかによるわ	n
person 2	yes , i have a communication degree	はい、私は通信学を持っています	n
person 1	really ? do you work ? does your degree help you ?	本当に仕事をしていますか ？	n
person 2	i am actually in the navy . what do you do for a living ?	本当に海軍に住んでるんだ何のために生活してるんだ ？	n
person 1	i freelance . i just quit my job . i was doing alot of painting .	仕事を辞めて絵を描いてたんだ	n
person 2	oh okay why did you quit	なぜ辞めたんだ ？	y
person 1	my boss was jerk . i figured i could make enough money just screwing around on the web .	ボスはバカだったのに金が足りなかったと思ってた	n
person 2	cool . . . do you have any hobbies	クールだな君にはモップがある	n
