# Supplementary material
Source: ML conference proceedings conference paper supplement (https://aclanthology.org/2022.eval4nlp-1.9)
Supplement: SupplementaryMaterial [file 0154.xlsx]

## Sheet: Sheet1
person	source	translation	evaluation: is this a good translation?
person 1	こんにちは…少し悩みを聞いてもらえませんか？	Hello, can I ask you a few questions?	n
person 2	もちろんですよ！どうしたのですか？	Of course, what's going on?	y
person 1	最近寝不足で…本当に寝れなくて。どうすればいいですかね？	What are we supposed to do if we can't sleep anymore?	n
person 2	それはお気の毒に。いい方法があります。玉ねぎを食べることです！	I'm sorry to hear that, but we have a good choice.	n
person 1	我慢強い性格が影響したのかも…なるほど、今度食べてみます！そういうことに詳しいのですね！	Well, maybe you know how to eat that now!	n
person 2	いえいえ、私は沖縄県の島人でおじいやおばあがよくそういうことおしえてくれるので！ところで何かリラックスできることしてますか？	No, I'm just a woman from Okinawa, so can you relax and relax?	n
person 1	特にはしていませんね、でもくせ毛の手入れをしているときがリラックスしているかもしれません。	Especially when you're cleaning your hair.	n
person 2	なるほど。雨の日なんてちょっと嫌ですね。大泉洋がいじられているのをみて大変だなあって！わたしは大声を出すのがリラックス法で演劇部にいるんですよ！	Well, I don't want to look at the days of rain, but I'm going to make a noise!	n
person 1	それはすごい！！あなたにぴったりだ、私が住んでいる東日本にもきたことありありますか？	It's perfect for you. Have I ever been to Japan?	n
person 2	いえ、まだ西日本どまりです！名古屋を超えたことがありません！でも行きたいですね。	No, but I haven't been to Japan in a long time!	n
