# Supplementary material
Source: ML conference proceedings conference paper supplement (https://aclanthology.org/2022.eval4nlp-1.9)
Supplement: SupplementaryMaterial [file 0154.xlsx]

## Sheet: Sheet1
person	source	translation	evaluation: is this a good translation?
person 1	hello . how are you doing this evening ?	こんばんは。お元気ですか？	y
person 2	i am great , how are you ?	とても元気です、あなたは？	y
person 1	doing fine . just watching netflix . how about yourself ?	元気ですよ。ネットフリックスを見てました。あなたは？	y
person 2	just listening to some folk music	フォークミュージックを聴いてたところです。	y
person 1	nice . do you have a favorite band ?	良いですね。お気に入りのバンドはありますか？	y
person 2	i like all music genres . do you have a fave ?	私はどんな音楽ジャンルも好きなんです。あなたには推しがありますか？	y
person 1	nah i do not have a favorite . it just depends what mood i am in . do you read ?	いえ、お気に入りはありません。自分がどんな気分かによりますね。読書はしますか？	y
person 2	yes , i have a communication degree	はい、私はコミュニケーション学位を持っているんです。	y
person 1	really ? do you work ? does your degree help you ?	ほんとですか？あなたのお仕事は？学位は役に立っていますか？	y
person 2	i am actually in the navy . what do you do for a living ?	実は私は海軍に所属しているんです。あなたのお仕事は？	y
person 1	i freelance . i just quit my job . i was doing alot of painting .	私はフリーランスです。仕事を辞めたばかりなんです。塗装を大分やってたんですが。	n
person 2	oh okay why did you quit	あーそうなんですね。どうして辞めたんですか？	y
person 1	my boss was jerk . i figured i could make enough money just screwing around on the web .	上司が最低だったので。インターネット上で適当にやってるだけでお金を十分稼げるとわかったんですよ。	y
person 2	cool . . . do you have any hobbies	良いですね・・・。なにか趣味はありますか？	y
