# Supplementary material
Source: ML conference proceedings conference paper supplement (https://aclanthology.org/2022.eval4nlp-1.9)
Supplement: SupplementaryMaterial [file 0155.xlsx]

## Sheet: Sheet1
person	source	translation	evaluation: is this a good translation?
person 1	こんにちは、わたし寒い地域で育ちました。あなたはどんなところに住んでいますか？	Hi, I grew up in cold territory.	n
person 2	こんにちは。わたしは全く反対の気候、一年中温暖な地域で生まれ育ったんですよ。	Hi. I grew up in the global warming area.	n
person 1	温かい地域いいですね。わたしの出身地は牛タンで有名なところですがどこかわかりますか？	Do you know where my land is from?	n
person 2	牛タンですか？どこだったか、、、忘れてしまいました。どこですか？	Where was I, Tintin?	n
person 1	仙台ですよー。わたしは最近中途採用で採用された社員として働いています。フレックスタイム制でよい会社に入社できてうれしいです。	I work as an employee recently as an employee of Frederivative time.	n
person 2	仙台でしたか～ フレックスタイム制で働ける会社、良いですね。私は普通の会社勤務ですが、出身地の影響かのんびり屋だとよく言われます。	I'm glad you're working for the Frex company, because it's a good time for me.	n
person 1	のんびり屋さん、いいなあ。わたしは正反対で頑固ってよく言われるんです。	Easy, easy, easy, easy, easy, easy, easy, easy, easy, easy, easy, easy, easy, easy, easy, easy.	n
person 2	そうなんですか？でも強そうで羨ましいです。わたしは弱虫なところもあって、そこを直したいと思っています。	But I'm jealous of being weak, and I want to fix it back there.	n
person 1	そういってもらえると、なんだかうれしい。	I'm glad to hear that.	y
person 2	良かったです。ちなみに、わたしはウナギが大好物ですが、あなたは何が好きですか？	Good, but what do you like about Utivich?	n
person 1	わたしはアナゴが好きです。穴子丼とか最高です。	I like anarchy and a great caveman.	n
person 2	アナゴも鰻と似たような味わいなので、私も好きです。	I like the taste of an anarchists too.	n
