# Supplementary material
Source: ML conference proceedings conference paper supplement (https://aclanthology.org/2022.eval4nlp-1.9)
Supplement: SupplementaryMaterial [file 0155.xlsx]

## Sheet: Sheet1
person	source	translation	evaluation: is this a good translation?
person 1	こんにちは、わたし寒い地域で育ちました。あなたはどんなところに住んでいますか？	Hello. I grew up in a cold region. What kind of place do you live in?	y
person 2	こんにちは。わたしは全く反対の気候、一年中温暖な地域で生まれ育ったんですよ。	Hello. I was born and raised in a climate that's the opposite to yours: a region that's warm all year round.	y
person 1	温かい地域いいですね。わたしの出身地は牛タンで有名なところですがどこかわかりますか？	A warm region sounds nice. I'm from a place that's famous for cow tongue. Do you know where it is?	y
person 2	牛タンですか？どこだったか、、、忘れてしまいました。どこですか？	Cow tongue? Where could it be... I forget. Where is it?	y
person 1	仙台ですよー。わたしは最近中途採用で採用された社員として働いています。フレックスタイム制でよい会社に入社できてうれしいです。	It's Sendai! I recently got hired mid-career and work at an office. I'm happy to be employed at a nice company that has a flexitime system.	y
person 2	仙台でしたか～ フレックスタイム制で働ける会社、良いですね。私は普通の会社勤務ですが、出身地の影響かのんびり屋だとよく言われます。	Oh, Sendai, huh! A company where you can work flexitime sounds nice. I work at a regular office, and people tell me I'm easygoing, perhaps because of where I'm from.	y
person 1	のんびり屋さん、いいなあ。わたしは正反対で頑固ってよく言われるんです。	Easygoing sounds nice. I'm the opposite. People tell me often that I'm stubborn.	y
person 2	そうなんですか？でも強そうで羨ましいです。わたしは弱虫なところもあって、そこを直したいと思っています。	Really? But I'm envious of you because that makes you sound tough. I'm a bit weak so I want to fix that part of me.	y
person 1	そういってもらえると、なんだかうれしい。	Having you tell me that makes me kind of happy.	y
person 2	良かったです。ちなみに、わたしはウナギが大好物ですが、あなたは何が好きですか？	I'm glad to hear that. By the way, I love eel, but what do you like?	y
person 1	わたしはアナゴが好きです。穴子丼とか最高です。	I like conger eel. Conger eel rice bowls are simply the best.	y
person 2	アナゴも鰻と似たような味わいなので、私も好きです。	Conger eels taste similar to eels, so I like them too.	y
