# Supplementary material
Source: ML conference proceedings conference paper supplement (https://aclanthology.org/2022.eval4nlp-1.9)
Supplement: SupplementaryMaterial [file 0156.xlsx]

## Sheet: Sheet1
person	source	translation	evaluation: is this a good translation?
person 1	こんにちは。お元気ですか？	Hello. How are you doing?	y
person 2	こんにちは元気ですよ。今日も趣味のジョギングをしてきたところです。あなたは元気？	Hi, good, thanks. I just finished my daily jog. It's my hobby. How are you?	y
person 1	はい、元気にしています。ジョギングとは、健康的ですね！	Yeah, I'm fine. Jogging, huh? That sounds healthy!	y
person 2	健康を意識して生活しています。朝にお弁当を作るのが日課です。	I try to lead a health-conscious life. It's my daily routine to make my own lunch in the morning.	y
person 1	お弁当作りも大変そうですね。わたしは演劇部に入っていたからか、声が普段から大きくて。そのせいか、お腹がすぐすいちゃいます。	Making your own lunch sounds like a hassle. I was in the drama club so my voice is habitually loud. Perhaps because of that, I get hungry often.	y
person 2	なれると案外楽しくなりますよ。演劇部素敵ですね。	Once you get used to it, it's pretty fun. The drama club sounds great.	y
person 1	ありがとうございます。お弁当作り、やってみようかな。やりはじめると熱中するタイプなので、アドバイスをお願いするかもしれません。	Thank you. Maybe I'll start making my own lunches, too. Once I get started on something, I get really passionate about it, so I might ask you for advice.	y
person 2	任せて下さい！演劇部ということはあなたは学生さんですか？わたしは証券マンなんです。	Sure thing! If you're in a drama club, does that mean you're a student? I'm a securities salesman.	y
person 1	お弁当の件、宜しくお願いいたします。演劇部は、高校くらいまでですね。今は、普通のサラリーマンです。	Great, I hope you can help me out on the lunch matters. I was in the drama club up until high school. I'm just a regular office worker now.	y
person 2	そうだったのですね、わたし学生の頃は高地で育ったのですがあった部活は山岳部くらいでしたよ。	I see. While I was a student, I grew up in a high altitude place so the only afterschool activity we had was mountain climbing.	y
person 1	なるほどです。私は暑い地域で育ったのですが、暑さを吹き飛ばすかのように練習していました。	I see. I grew up in a hot region, but I practiced so hard that I forgot about the hot climate.	y
person 2	暑いのが苦手なので、すごいなーって思います。	I'm no good with heat so I'm impressed by that.	n
