# Supplementary material
Source: ML conference proceedings conference paper supplement (https://aclanthology.org/2022.eval4nlp-1.9)
Supplement: SupplementaryMaterial [file 0156.xlsx]

## Sheet: Sheet1
person	source	translation	evaluation: is this a good translation?
person 1	こんにちは。お元気ですか？	Hello. How are you?	y
person 2	こんにちは元気ですよ。今日も趣味のジョギングをしてきたところです。あなたは元気？	Hello, I've been working on my hobby today. How are you?	n
person 1	はい、元気にしています。ジョギングとは、健康的ですね！	Yes, I'm fine and jogging is healthy!	y
person 2	健康を意識して生活しています。朝にお弁当を作るのが日課です。	It's my day off, making lunch in the morning.	n
person 1	お弁当作りも大変そうですね。わたしは演劇部に入っていたからか、声が普段から大きくて。そのせいか、お腹がすぐすいちゃいます。	I feel like I was having lunch too, because my voice is usually getting bigger, and I'm starving right now.	n
person 2	なれると案外楽しくなりますよ。演劇部素敵ですね。	It'll be fun outside the theater.	n
person 1	ありがとうございます。お弁当作り、やってみようかな。やりはじめると熱中するタイプなので、アドバイスをお願いするかもしれません。	Thank you for making lunch, so let me give you some advice.	n
person 2	任せて下さい！演劇部ということはあなたは学生さんですか？わたしは証券マンなんです。	You're a student of the theatre, aren't you?	n
person 1	お弁当の件、宜しくお願いいたします。演劇部は、高校くらいまでですね。今は、普通のサラリーマンです。	Please take care of your lunch show, especially now that I'm a high school manager.	n
person 2	そうだったのですね、わたし学生の頃は高地で育ったのですがあった部活は山岳部くらいでしたよ。	Well, I grew up in the mountains when I was a high school student.	n
person 1	なるほどです。私は暑い地域で育ったのですが、暑さを吹き飛ばすかのように練習していました。	Well, I grew up in a hot area, and I was practicing to blow the heat off.	y
person 2	暑いのが苦手なので、すごいなーって思います。	I don't think it's so hot, so it's great.	n
