# Supplementary material
Source: ML conference proceedings conference paper supplement (https://aclanthology.org/2022.eval4nlp-1.9)
Supplement: SupplementaryMaterial [file 0157.xlsx]

## Sheet: Sheet1
person	source	translation	evaluation: is this a good translation?
person 1	こんにちは。最近は元気ですか？	Hello. How have you been doing recently?	y
person 2	こんにちは、元気ですよ。	Hello. I'm doing well.	y
person 1	わたしもです。一年中温暖な地域で育ったせいか、のんびりした性格だってよく人に言われるんです。	Me too. People often tell me that I have a laidback personality, maybe it's because I grew up in a region that's warm throughout the year.	y
person 2	わたしも離島の生まれ、育ちでのんびりしてるねってよく言われます。	I was also born and raised on a remote island and people tell me I'm easygoing.	n
person 1	そうなんですね！でも、自分ではそんなにのんびりしているだけではなくて、ちょっと弱虫なところもあるかなと思っています。	I see! But, I don't really think that I'm laidback. I think that there are parts of me that are cowardly.	n
person 2	そうなのですね。わたしは離島生まれを馬鹿にされてきたのでそれをバネに勉強して今は商社で働いています。	I see. People made fun of me because I was born on a remote island so I used that anger to fuel my studies and I work at a trading company now.	n
person 1	商社にお勤めなんて、すごいです。わたしは最初に就職してから一度も転職せずに働いているんですが、なかなかキャリアアップできません。	That's incredible that you work for a trading company. I've never changed jobs ever since I first got employed, but I haven't been able to go up the career ladder.	y
person 2	なかなかキャリアアップしていくのも難しいですよね。わたしは商談を決めた時のご馳走にステーキを食べます。	It's pretty difficult to move up the career ladder, isn't it? Whenever I have a successful business negotiation, I eat a steak as a treat.	y
person 1	わたしもです！ウナギが大好物なので、給料日にはお気に入りの店に食べに行くんです。	I'm the same! I love eel, so on payday, I go to have it at my favorite restaurant.	y
person 2	うなぎも美味しいですね。	Eel is delicious, too.	y
person 1	そうなんですよ。ほかに何か趣味はありますか？わたしは無趣味なので、参考にさせていただきたいです。	Indeed. Do you have any other hobbies? I don't have any, so I want to use yours as a reference point.	n
person 2	趣味はないですね。鼻が低いのがコンプレックスです。	I don't have any hobbies. I have an inferiority complex about how stubby my nose is.	y
person 1	えーっ、そんなに低くは見えませんよ！とっても素敵だと思います。	What! I don't think it's that stubby! I think it's quite lovely.	y
person 2	ありがとうございます。自信を持っていきます。	Thank you very much. I'll try to be more confident from now on.	y
