# Supplementary material
Source: ML conference proceedings conference paper supplement (https://aclanthology.org/2022.eval4nlp-1.9)
Supplement: SupplementaryMaterial [file 0157.xlsx]

## Sheet: Sheet1
person	source	translation	evaluation: is this a good translation?
person 1	こんにちは。最近は元気ですか？	Hello. How are you today?	n
person 2	こんにちは、元気ですよ。	Hi. I'm fine.	y
person 1	わたしもです。一年中温暖な地域で育ったせいか、のんびりした性格だってよく人に言われるんです。	Me too. I've grown up in global warming for a year or two.	n
person 2	わたしも離島の生まれ、育ちでのんびりしてるねってよく言われます。	I'm getting used to being raised up in the island too.	n
person 1	そうなんですね！でも、自分ではそんなにのんびりしているだけではなくて、ちょっと弱虫なところもあるかなと思っています。	Well, it's not just that I'm getting so excited about myself, but I think there's a little weak out there.	n
person 2	そうなのですね。わたしは離島生まれを馬鹿にされてきたのでそれをバネに勉強して今は商社で働いています。	Well, I'm working on it now because I'm an idiot from the island, and I'm studying it.	n
person 1	商社にお勤めなんて、すごいです。わたしは最初に就職してから一度も転職せずに働いているんですが、なかなかキャリアアップできません。	I can't work at work at the beginning of a great career, so I can't work on it.	n
person 2	なかなかキャリアアップしていくのも難しいですよね。わたしは商談を決めた時のご馳走にステーキを食べます。	You know, it's hard for me to decide when I decide to buy a steak when I decide to raise my career.	n
person 1	わたしもです！ウナギが大好物なので、給料日にはお気に入りの店に食べに行くんです。	I'm going to the big day and I'm going to the store and I'm going to get a lot of my favorite food.	n
person 2	うなぎも美味しいですね。	It's delicious, isn't it?	n
person 1	そうなんですよ。ほかに何か趣味はありますか？わたしは無趣味なので、参考にさせていただきたいです。	Well, do you have anything else I'd like to show you?	n
person 2	趣味はないですね。鼻が低いのがコンプレックスです。	You don't have any hobby. Your nose is a little low.	n
person 1	えーっ、そんなに低くは見えませんよ！とっても素敵だと思います。	I don't think it looks so good!	n
person 2	ありがとうございます。自信を持っていきます。	Thank you very much.	n
