# Supplementary material
Source: ML conference proceedings conference paper supplement (https://aclanthology.org/2022.eval4nlp-1.9)
Supplement: SupplementaryMaterial [file 0158.xlsx]

## Sheet: Sheet1
person	source	translation	evaluation: is this a good translation?
person 1	こんにちは、わたしはジョギングが趣味なのですが趣味などありますか？	Hello. My hobby is jogging. Do you have any hobbies?	y
person 2	はい、時代小説を読むのが好きですね。特に坂本龍馬は尊敬しています。	Yes. I like to read historical novels. I especially respect Ryoma Sakamoto.	y
person 1	坂本龍馬は素晴らしい人ですね。わたしは商社マンなのですが参考にする部分が多々あります。	Ryoma Sakamoto was a wonderful person. I'm a securities salesman, but there are a lot of things about him that I refer to in my job.	n
person 2	商社にお勤めなんですか！わたしはいわゆる鉄道マンです。	Wow, you work for a trading company! I'm what you call a railroad worker.	y
person 1	鉄道関係は大事な仕事ですね。わたしは切れ長の目が自慢あのですがチャームポイントなどありますか？	Railroad jobs are quite important. I'm quite proud of my almond-shaped eyes, but is there anything that you consider your charm?	y
person 2	いやー、残念ながらないですね。ただ、集中力が高いことだけは自慢でして、それが仕事にも活かせているかなと思います。	Well, unfortunately not. But I can brag about how highly focused I can become, and I think I'm putting it to good use at work.	y
person 1	集中力高いのは羨ましいです。私は、朝にお弁当を作るのが日課で商談など決めるためのげん担ぎなどにもなっています。	I'm envious that you have good concentration. It's my daily routine to make my own lunch in the morning, and I do it to wish myself good luck in business negotiations.	y
person 2	お弁当作りですか、いろいろキャラ弁などもあって楽しいですよね。ところで、どちらにお住まいですか？	Making your own lunch, huh? It's pretty fun to do, isn't it, because you can make character-decorated lunch boxes. By the way, where do you live right now?	n
person 1	わたしは都内に住んでいます。子供の頃は高知に住み育ちました。	I live in Tokyo, but I was raised in Kochi.	n
person 2	高知といえば、海と渓流がきれいですよね！わたしも川のそばの団地に住んでいますので、少し親近感を覚えます。	Speaking of Kochi, it has beautiful ocean and mountain streams, doesn't it! I live in a housing complex near a river, so I feel somehow familiar to you.	y
