# Supplementary material
Source: ML conference proceedings conference paper supplement (https://aclanthology.org/2022.eval4nlp-1.9)
Supplement: SupplementaryMaterial [file 0158.xlsx]

## Sheet: Sheet1
person	source	translation	evaluation: is this a good translation?
person 1	こんにちは、わたしはジョギングが趣味なのですが趣味などありますか？	Hello, I'm a jogging joker. Do you have any hobby?	n
person 2	はい、時代小説を読むのが好きですね。特に坂本龍馬は尊敬しています。	Yes, I like reading old stories. Especially the dragon's horses.	n
person 1	坂本龍馬は素晴らしい人ですね。わたしは商社マンなのですが参考にする部分が多々あります。	The dragonriders are great people. I have a lot of men in my company.	n
person 2	商社にお勤めなんですか！わたしはいわゆる鉄道マンです。	Do I work for the company?	n
person 1	鉄道関係は大事な仕事ですね。わたしは切れ長の目が自慢あのですがチャームポイントなどありますか？	The train is important. I'm proud of that smart eye.	n
person 2	いやー、残念ながらないですね。ただ、集中力が高いことだけは自慢でして、それが仕事にも活かせているかなと思います。	I'm proud of that, but I'm just proud of it.	n
person 1	集中力高いのは羨ましいです。私は、朝にお弁当を作るのが日課で商談など決めるためのげん担ぎなどにもなっています。	I'm lucky to have lunch at the office in the morning to decide what to do with lunch.	n
person 2	お弁当作りですか、いろいろキャラ弁などもあって楽しいですよね。ところで、どちらにお住まいですか？	By the way, did you enjoy having lunch with either of you?	n
person 1	わたしは都内に住んでいます。子供の頃は高知に住み育ちました。	I lived in the city when I was a kid.	n
person 2	高知といえば、海と渓流がきれいですよね！わたしも川のそばの団地に住んでいますので、少し親近感を覚えます。	As you know, the ocean and the ocean are a little closer to my parents' land!	n
