# Supplementary material
Source: ML conference proceedings conference paper supplement (https://aclanthology.org/2022.eval4nlp-1.9)
Supplement: SupplementaryMaterial [file 0159.xlsx]

## Sheet: Sheet1
person	source	translation	evaluation: is this a good translation?
person 1	こんにちは。気分はどうですか？	Hello. How are you feeling?	y
person 2	実はちょっと落ち込んでいます。	I'm actually a little depressed.	y
person 1	えっ、何があったんですか？相談に乗りますよ。	What happened to you?	n
person 2	わたしは料理が苦手なのですが今も失敗していまいました。	I'm not very good at cooking, but I haven't failed.	n
person 1	なんだ、そんなことですか。わたしなんて、鼻が低いことをずっと悩み続けていますよ！	Oh, my God, I've been so worried about my nose all the time!	n
person 2	なかなか上手くならないので辛いです。整形は考えいないのですか？	It's not gonna work so well because you don't think it works?	n
person 1	いえいえ、料理ならきっと続ければ上達します。でも鼻は高くなりませんし、整形も嫌です。	No, if you keep cooking, your nose won't be high, but I don't want to be high.	n
person 2	そうなのですね。わたしは唇がセクシーと言われるのですが自分ではコンプレックスです。	Well, I'm just saying that my lips are sexy, but I'm a Prescient.	n
person 1	セクシーは褒め言葉ですよ！わたしは自分をとにかく良く見せたくて、知人には自意識過剰じゃないかって言われるほどです。	I'm so proud to say that I don't want to see myself much more often than I do.	n
person 2	褒め言葉なのでしょうがもっと薄い唇がよかったです。誰でもよく見せたいものですので自意識過剰ってほどではないと思います！	I'd like to show you something more than a compliment, but I don't think anyone would want to see it so much as yourself.	n
person 1	ありがとうございます。わたしは離島生まれですので昔は何とも思っていませんでしたが、都会ですとどうしても職業柄気になってしまいまして。	Thank you very much. I was born in a city where I was born.	n
person 2	なるほどですね。わたしも広島在住ですが都心に出る時などはどうしても気になりますね。	Well, I'm from the island, too, but when I get out of the city, I feel like I'm going to have to worry about my life.	n
person 1	そうなんです。特に商社マンとしてさまざまな交渉を行っておりますので、外見は命です。	Yeah, well, as a company manager, I'm looking forward to making a deal, especially if I'm going to live with it.	n
person 2	わたしも保険外交員なので外見はかなり大事です。お互い頑張っていきましょう。	I'm a very interested in insurance company, and we're doing very well.	n
