# Supplementary material
Source: ML conference proceedings conference paper supplement (https://aclanthology.org/2022.eval4nlp-1.9)
Supplement: SupplementaryMaterial [file 0159.xlsx]

## Sheet: Sheet1
person	source	translation	evaluation: is this a good translation?
person 1	こんにちは。気分はどうですか？	Hello. How are you feeling?	y
person 2	実はちょっと落ち込んでいます。	Actually, I'm a bit depressed.	y
person 1	えっ、何があったんですか？相談に乗りますよ。	Huh, what happened? You can talk to me if you want to.	y
person 2	わたしは料理が苦手なのですが今も失敗していまいました。	I'm not good at cooking, and I just failed at it again.	y
person 1	なんだ、そんなことですか。わたしなんて、鼻が低いことをずっと悩み続けていますよ！	Oh, that's the problem? I've been troubled about how stubby my nose is for a long time!	y
person 2	なかなか上手くならないので辛いです。整形は考えいないのですか？	I'm sad because I'm not improving very much. Haven't you thought about getting plastic surgery?	y
person 1	いえいえ、料理ならきっと続ければ上達します。でも鼻は高くなりませんし、整形も嫌です。	Oh, come on now. If it's a matter of cooking, I'm sure you can get better at it if you continue to practice. My nose won't grow though, and I don't want to have plastic surgery.	y
person 2	そうなのですね。わたしは唇がセクシーと言われるのですが自分ではコンプレックスです。	I see. People tell me that my lips are sexy but I'm not happy with them myself.	y
person 1	セクシーは褒め言葉ですよ！わたしは自分をとにかく良く見せたくて、知人には自意識過剰じゃないかって言われるほどです。	Sexy is a great compliment! As for me, I want to show myself in a good light to others to the point that people tell me I'm being excessively self-conscious.	n
person 2	褒め言葉なのでしょうがもっと薄い唇がよかったです。誰でもよく見せたいものですので自意識過剰ってほどではないと思います！	It might be a compliment, but I wish I had thinner lips. I think everyone wants to make themselves look good to others, so I don't think you're being excessively self-conscious.	y
person 1	ありがとうございます。わたしは離島生まれですので昔は何とも思っていませんでしたが、都会ですとどうしても職業柄気になってしまいまして。	Thank you. I was born on a remote island, and I didn't think anything of it a long time ago, but living in the city and with my job, I just become concerned.	n
person 2	なるほどですね。わたしも広島在住ですが都心に出る時などはどうしても気になりますね。	I see. I'm from Hiroshima, but whenever I go into the city center, I can't help feeling self-conscious, too.	y
person 1	そうなんです。特に商社マンとしてさまざまな交渉を行っておりますので、外見は命です。	Exactly. As a securities salesman, I take on various negotiations, so looks are critical.	n
person 2	わたしも保険外交員なので外見はかなり大事です。お互い頑張っていきましょう。	I'm an insurance salesman, so looks are critical for me, too. Let's both keep up the good work.	y
