# Supplementary material
Source: ML conference proceedings conference paper supplement (https://aclanthology.org/2022.eval4nlp-1.9)
Supplement: SupplementaryMaterial [file 0160.xlsx]

## Sheet: Sheet1
person	source	translation	evaluation: is this a good translation?
person 1	こんにちは。わたしは川のそばにある団地に住んでいます。	Hello. I live in a housing complex near a river.	y
person 2	こんにちは！私はスーパー近くのアパート暮らしですよ！	Hello! I live in an apartment near a supermarket!	y
person 1	スーパー近くって、楽そうで良いですね。わたしも、そういうところに住みたかったなぁ。	Being close to the supermarket sounds convenient. I wish I lived in a place like that, too.	y
person 2	便利です！外資系に勤めていることもあり、忙しくて、ついついスーパーの総菜を買ってしまいます。	It is pretty convenient! I'm so busy all the time, partly because I work for a foreign company, and I always end up buying pre-made food at the supermarket.	y
person 1	そうですよね。スーパーの総菜って、意外とレベル高くて美味しいですもんね。わたしも鉄道マンで一人暮らしなんで、よくわかります。	I know, right. Pre-made food from the supermarket is actually quite high-quality and delicious, isn't it? I'm a railroad worker and I live alone, so I understand what you mean.	y
person 2	そうなんですよね！でも大好きな食べ物は、総菜ダメだなと思いました。私にとっておふくろの味のカツ丼を買ってきて食べたんですけど、がっかりしちゃって…。	Right? But I realized pre-made was no good when it comes to my favorite food. Pork cutlets over rice is what I consider the taste of home cooking, so I bought one from the supermarket and ate it, but I was disappointed by it...	y
person 1	あはは、確かに！おふくろの味には勝てないですもんね！好きな食べ物なら、なおさらですよね。	Hahaha, you're right! Nothing beats mother's cooking! Especially if it's your favorite food.	y
person 2	そうなんですよね。ところで、尊敬している人はいますか？私は父親を尊敬しているんです。	Exactly. By the way, do you have anyone you respect? I respect my father.	y
person 1	お父様ですか。きっと素晴らしい人なんですね。わたしは、坂本龍馬を尊敬しています。	Your father, huh? I'm sure he must be a wonderful man. I respect Ryoma Sakamoto.	y
person 2	坂本龍馬ですか！私も好きです。かっこいいですよね。	Ryoma Sakamoto, huh! I like him, too. He's cool.	y
