# Supplementary material
Source: ML conference proceedings conference paper supplement (https://aclanthology.org/2022.eval4nlp-1.9)
Supplement: SupplementaryMaterial [file 0160.xlsx]

## Sheet: Sheet1
person	source	translation	evaluation: is this a good translation?
person 1	こんにちは。わたしは川のそばにある団地に住んでいます。	Hello. I live near the river.	n
person 2	こんにちは！私はスーパー近くのアパート暮らしですよ！	Hello, I live near the supermarket!	n
person 1	スーパー近くって、楽そうで良いですね。わたしも、そういうところに住みたかったなぁ。	It's nice to live in the supermarket, too.	n
person 2	便利です！外資系に勤めていることもあり、忙しくて、ついついスーパーの総菜を買ってしまいます。	It's useful to be working at the supermarket, buying the super market.	n
person 1	そうですよね。スーパーの総菜って、意外とレベル高くて美味しいですもんね。わたしも鉄道マンで一人暮らしなんで、よくわかります。	Yeah, well, I know how to live alone with the supermarket, and I'm pretty good at living alone.	n
person 2	そうなんですよね！でも大好きな食べ物は、総菜ダメだなと思いました。私にとっておふくろの味のカツ丼を買ってきて食べたんですけど、がっかりしちゃって…。	Yeah, but I thought you said you liked food but you bought my mother's taste for me!	n
person 1	あはは、確かに！おふくろの味には勝てないですもんね！好きな食べ物なら、なおさらですよね。	I'm sure you like to win, Mom, but you don't like to win.	n
person 2	そうなんですよね。ところで、尊敬している人はいますか？私は父親を尊敬しているんです。	Well, by the way, do I respect my father?	n
person 1	お父様ですか。きっと素晴らしい人なんですね。わたしは、坂本龍馬を尊敬しています。	You must be a wonderful man, I respect the dragon's book.	n
person 2	坂本龍馬ですか！私も好きです。かっこいいですよね。	I like dragon horses, too!	n
