# Supplementary material
Source: ML conference proceedings conference paper supplement (https://aclanthology.org/2022.eval4nlp-1.9)
Supplement: SupplementaryMaterial [file 0161.xlsx]

## Sheet: Sheet1
person	source	translation	evaluation: is this a good translation?
person 1	what are you doing right now ?	今なにをしてますか？	y
person 2	getting ready to go to work at target . you ?	ターゲットに仕事に行く用意をしてました。あなたは？	y
person 1	basically the same . i work as a mortician so i prepare dead bodies	大体同じです。私は葬儀屋として働いています。つまり遺体を整えるんです。	y
person 2	ugh , that must be difficult work . do you have any pets ?	げっ、大変なお仕事なんでしょうね。なにかペットは飼っていますか？	y
person 1	no i do not , but i am a stamp collector so that keeps me busy	いえ飼ってません、でも私は切手収集家なので退屈しないんです。	y
person 2	nice . i have an amazing dog . i buy her a treat everyday after work .	良いですね。私には可愛い犬がいるんです。毎日仕事の帰りにおやつを買ってあげるんですよ。	y
person 1	you are a good pet owner then !	それは良い飼い主ですね！	y
person 2	i try . where are you from ?	努力してます。ご出身はどちらですか？	y
person 1	i am from texas . what about you ?	私はテキサス出身です。 あなたは？	y
person 2	i live in california .	私はカリフォルニアに住んでいます。	y
person 1	oh is it nice out there ?	あー、そちらは快適ですか？	y
person 2	it is . do you have a favorite color ?	はい。好きな色はありますか？	y
person 1	yes ! i absolutely love teal and yellow . you ?	もちろん！青緑と黄色が本当に大好きです。あなたは？	y
person 2	cool ! i really love the color green .	良いですね！私は緑色が一番好きです。	y
