# Supplementary material
Source: ML conference proceedings conference paper supplement (https://aclanthology.org/2022.eval4nlp-1.9)
Supplement: SupplementaryMaterial [file 0161.xlsx]

## Sheet: Sheet1
person	source	translation	evaluation: is this a good translation?
person 1	こんにちは。わたし、広島に住んでるんだけど、あなたはこの辺の人？	Hello. I live in Hiroshima. Are you from around here?	y
person 2	こんにちは。うん、まあ地元かな。	Hello. Well, yeah, I suppose you could say this is my hometown.	y
person 1	そうなんだ？わたしね、ソウルフードはお好み焼きなんだけど、広島のお好み焼きっていうと、みんなに広島焼きのこと？って聞かれるのよね。	Oh really? My comfort food is okonomiyaki, but when I say okonomiyaki from Hiroshima, people ask me, "Are you talking about Hiroshima-yaki?"	y
person 2	有名だものね。あなたはコンビニってよく行く？	It's quite famous, isn't it? Do you go to the convenience store often?	y
person 1	広島県民にとっては、あれがお好み焼きなんだけどな～。え？コンビニ？よく行くわよ。だって、料理苦手だもの。	For Hiroshima residents, that's what okonomiyaki is. Huh? Convenience stores? Sure, I often go, because I'm no good at cooking.	n
person 2	そうなんだ。わたしコンビニスイーツに目がなくて、新製品が出るとすぐ買っちゃうの。だからじゃないけど、家はコンビニのすぐそば。	Oh, I see. Well, I'm a sucker for desserts sold in convenience stores and I can't help buying new ones as soon as they go on sale. And my house is right near to a convenience store, although that's not the reason why.	y
person 1	コンビニのすぐそばなの？それは便利ね。わたし、保険外交員の仕事してるんだけど、忙しいから、うちのそばにも誰かコンビニ作ってくれないかしら？	It's right near a convenience store? That must be handy. I work as an insurance salesperson, but I'm so busy I wish someone could build a convenience store near my house, too.	y
person 2	できるといいね。あなたもお仕事忙しそう。わたしはIT系企業で働いてるの。	I hope there will be one soon. You do look busy with work. I work at a tech company.	y
person 1	IT系企業かぁ。あなたも大変そうね。ところで、わたしのチャームポイントは唇なんだけど、セクシーだと思わない？よく人に言われるのよ。	A tech company, huh? You sound busy, too. By the way, my best features are my lips. Don't you think they look sexy? People tell me that often.	y
person 2	言われてみると、うん、セクシーな唇。うらやましいな。わたしも負けてないかな？わたしは福耳。	Now that you mention it, your lips are sexy. I'm envious. But maybe I am on par with you. My best features are my plump ears.	y
