# Supplementary material
Source: ML conference proceedings conference paper supplement (https://aclanthology.org/2022.eval4nlp-1.9)
Supplement: SupplementaryMaterial [file 0161.xlsx]

## Sheet: Sheet1
person	source	translation	evaluation: is this a good translation?
person 1	こんにちは。わたし、広島に住んでるんだけど、あなたはこの辺の人？	Hello, I live in the vast island, but you live around here?	n
person 2	こんにちは。うん、まあ地元かな。	Hello, local.	n
person 1	そうなんだ？わたしね、ソウルフードはお好み焼きなんだけど、広島のお好み焼きっていうと、みんなに広島焼きのこと？って聞かれるのよね。	Well, I think Seoul likes the food, but they're all gonna burn up on the island, right?	n
person 2	有名だものね。あなたはコンビニってよく行く？	You're famous, right?	n
person 1	広島県民にとっては、あれがお好み焼きなんだけどな～。え？コンビニ？よく行くわよ。だって、料理苦手だもの。	I'm not good at cooking for the people of the island, but I'm not good at the convenience store, am I?	n
person 2	そうなんだ。わたしコンビニスイーツに目がなくて、新製品が出るとすぐ買っちゃうの。だからじゃないけど、家はコンビニのすぐそば。	Yeah, well, if I don't have a new product, I'm not gonna buy a new convenience store right away, so I'm gonna buy a convenience store right now.	n
person 1	コンビニのすぐそばなの？それは便利ね。わたし、保険外交員の仕事してるんだけど、忙しいから、うちのそばにも誰かコンビニ作ってくれないかしら？	Well, who's gonna be working with my insurance company, huh?	n
person 2	できるといいね。あなたもお仕事忙しそう。わたしはIT系企業で働いてるの。	Do you think I can work with a pharmaceutical company?	n
person 1	IT系企業かぁ。あなたも大変そうね。ところで、わたしのチャームポイントは唇なんだけど、セクシーだと思わない？よく人に言われるのよ。	By the way, the point is that you're a big fan of mine, don't you think I'm sexy?	n
person 2	言われてみると、うん、セクシーな唇。うらやましいな。わたしも負けてないかな？わたしは福耳。	Yeah, I'm jealous of my lips, too?	n
