# Supplementary material
Source: ML conference proceedings conference paper supplement (https://aclanthology.org/2022.eval4nlp-1.9)
Supplement: SupplementaryMaterial [file 0161.xlsx]

## Sheet: Sheet1
person	source	translation	evaluation: is this a good translation?
person 1	what are you doing right now ?	今何をしてるんだ ？	n
person 2	getting ready to go to work at target . you ?	目標に入る準備をしろ君は ？	n
person 1	basically the same . i work as a mortician so i prepare dead bodies	同じだ死体の準備はできてる	n
person 2	ugh , that must be difficult work . do you have any pets ?	大変だペットはいるか ？	n
person 1	no i do not , but i am a stamp collector so that keeps me busy	そうじゃないけど私はスタンプ屋なのだから忙しいの	n
person 2	nice . i have an amazing dog . i buy her a treat everyday after work .	いい子だ毎日彼女の世話をしてるんだ	n
person 1	you are a good pet owner then !	お前はいいペットだ	n
person 2	i try . where are you from ?	試してみるどこから来たんだ ？	n
person 1	i am from texas . what about you ?	メールのようなものですあなたは ？	n
person 2	i live in california .	カリフォルニアに住んでいます	y
person 1	oh is it nice out there ?	そこはいい所なの ？	y
person 2	it is . do you have a favorite color ?	好きな色はある ？	n
person 1	yes ! i absolutely love teal and yellow . you ?	もちろんだよ黄色と黄色が大好きだよ	n
person 2	cool ! i really love the color green .	クールだ色が大好きだ	n
