# Supplementary material
Source: ML conference proceedings conference paper supplement (https://aclanthology.org/2022.eval4nlp-1.9)
Supplement: SupplementaryMaterial [file 0162.xlsx]

## Sheet: Sheet1
person	source	translation	evaluation: is this a good translation?
person 1	こんにちは。突然だけど尊敬している人っている？わたしは父を尊敬しています。	Hello. This is a sudden question, but do you have anyone that you respect? I respect my father.	y
person 2	そういうのって、一番ステキな考え方だと思うよ。わたしは、父も母も好きだけど、職場の上司を尊敬してる。	I think that's the most wonderful way to think. I love my mum and dad, but I respect my boss at work.	y
person 1	良い上司に恵まれているんですね。わたし外資系の企業に勤めているんだけれど、あまり上司に恵まれていないから羨ましい。	You must have a nice boss, huh. I work for a foreign company and I don't have a very good boss, so I envy you.	y
person 2	外資系なんだね！わたしのほうは、小さな旅行代理店だから、人間関係が密なんだよ。	You work for a foreign company, huh! I work at a small travel agency, so the interpersonal relationships there are pretty close.	y
person 1	旅行代理店かぁ、近頃はどんなところに旅行するのがオススメ？	A travel agency, huh? What places do you recommend visiting lately?	y
person 2	よしきた！そういうの、任せて！人を喜ばせるのが生きがいだから、今度じっくり要望を聞かせてもらってもいいかな？ちゃんと調べて答えたいんだ。	Alright! Let me handle that question! I love to make other people happy, so can you tell me the details of your request next time? I want to do thorough research and give you an answer.	y
person 1	ぜひお願いします！わたしスーパーの近くのアパートで一人暮らしをしているから、寂しくてとっても旅行に行って気分転換をしたいなって思ってたところだったの。	Oh, yes, please! I live alone in an apartment near a supermarket and I've been feeling lonely, so I've been thinking that I really want to go on a trip to refresh myself.	y
person 2	そうだったんだね。アパートに住んでるってことは、賃貸？わたしは、マンションをこの前買ったんだよ。	I see. If you live in an apartment, does that mean you're renting the place? I bought a condo for myself a little while ago.	y
person 1	すごいなあ、わたしは賃貸。マンションを買ったてことは誰か同居人がいるの？	Wow. Yeah, I'm renting the place. If you've bought a condo, does that mean you live with someone?	y
person 2	ううん、独身で、一人暮らし。歯並びはいいけど、口が大きい男なんて、なかなかモテないんだよ。	Nope. I'm single and living alone. My teeth may be lined up nicely, but a guy with a huge mouth isn't popular with women.	y
