# Supplementary material
Source: ML conference proceedings conference paper supplement (https://aclanthology.org/2022.eval4nlp-1.9)
Supplement: SupplementaryMaterial [file 0162.xlsx]

## Sheet: Sheet1
person	source	translation	evaluation: is this a good translation?
person 1	こんにちは。突然だけど尊敬している人っている？わたしは父を尊敬しています。	Hello, who do you think I respect my father?	n
person 2	そういうのって、一番ステキな考え方だと思うよ。わたしは、父も母も好きだけど、職場の上司を尊敬してる。	I think that's the best idea, but my mother loves my job, too, and I respect my boss.	n
person 1	良い上司に恵まれているんですね。わたし外資系の企業に勤めているんだけれど、あまり上司に恵まれていないから羨ましい。	You've been a good boss, but I'm not so lucky to be a big fan of mine.	n
person 2	外資系なんだね！わたしのほうは、小さな旅行代理店だから、人間関係が密なんだよ。	I'm a very lucky man for a travel shop!	n
person 1	旅行代理店かぁ、近頃はどんなところに旅行するのがオススメ？	What kind of trip do you travel around these days, Oslo?	n
person 2	よしきた！そういうの、任せて！人を喜ばせるのが生きがいだから、今度じっくり要望を聞かせてもらってもいいかな？ちゃんと調べて答えたいんだ。	All right, I'll take care of it, so let me ask you a few questions, okay?	n
person 1	ぜひお願いします！わたしスーパーの近くのアパートで一人暮らしをしているから、寂しくてとっても旅行に行って気分転換をしたいなって思ってたところだったの。	Please, I just wanted to go out and change my mind for the rest of my life in a supermarket near the supermarket.	n
person 2	そうだったんだね。アパートに住んでるってことは、賃貸？わたしは、マンションをこの前買ったんだよ。	I bought this apartment before I lived in my apartment, right?	n
person 1	すごいなあ、わたしは賃貸。マンションを買ったてことは誰か同居人がいるの？	Hey, have I ever bought a rental house?	n
person 2	ううん、独身で、一人暮らし。歯並びはいいけど、口が大きい男なんて、なかなかモテないんだよ。	No, I'm single, but I'm not a very good guy.	n
