# Supplementary material
Source: ML conference proceedings conference paper supplement (https://aclanthology.org/2022.eval4nlp-1.9)
Supplement: SupplementaryMaterial [file 0163.xlsx]

## Sheet: Sheet1
person	source	translation	evaluation: is this a good translation?
person 1	ああ、疲れた。IT企業に勤めてるんだけど、IT系って現代の3K職場って言われてるんだよね。	Yeah, well, I'm tired of working for the IP company, but it's called 3K.	n
person 2	大変そうだよね。わたしはブライダル関係の会社に勤務してて華やかにみえるけどきついよ。	Well, it looks like I'm working at Bryant's company, but it's hard to see.	n
person 1	ああ、そっちもそうなんだ。わたしなんて、毎日深夜帰りだから、コンビニ弁当ばっかり食べてるよ。	Yeah, well, you too. I've been home all night eating my lunch since I left the convenience store.	n
person 2	こころがささくれちゃうよね。わたし人と話すのが好きだから、今日あなたと会えてうれしい。	I love to talk to you today because I love to talk to you today.	n
person 1	そんな風に言ってもらえると、こっちも嬉しいよ。そうだ、最近はコンビニスイーツがかなり美味しいって知ってる？	I'm glad to hear that, but you know, it's been a long time since I've seen you.	n
person 2	そうなの？今度仕事帰りに買ってみるね！教えてくれてありがとう！	I'll buy you a job next time!	n
person 1	いえいえ！家の近くにコンビニがあるから、しょっちゅうチェックしてるんだ。コンビニスイーツに目がなくて！	No, there's a convenience store near the house, and I've been checking every one of them all the time!	n
person 2	スイーツが好きなんだね！わたしは変かもしれないけど雨の日が好きなんだ。	I might like the rain, but I like the rain.	n
person 1	へえ、それって珍しいよね。なんか理由でもあるの？	Oh, that's interesting. Why?	y
person 2	特に理由はないんだけど雨の音を聞きながらぼーっと飼っているハムスターを眺めるのが落ち着くんだ。	I don't have a reason to listen to the rain, but, uh, the hamster will calm down.	n
