# Supplementary material
Source: ML conference proceedings conference paper supplement (https://aclanthology.org/2022.eval4nlp-1.9)
Supplement: SupplementaryMaterial [file 0163.xlsx]

## Sheet: Sheet1
person	source	translation	evaluation: is this a good translation?
person 1	ああ、疲れた。IT企業に勤めてるんだけど、IT系って現代の3K職場って言われてるんだよね。	Boy, am I tired. I work at a tech company, but people say tech workplaces are the modern 3D job environment.	n
person 2	大変そうだよね。わたしはブライダル関係の会社に勤務してて華やかにみえるけどきついよ。	It does sound pretty harsh. I work for a bridal-related company and it may look gorgeous on the outside but it's pretty tough, too.	y
person 1	ああ、そっちもそうなんだ。わたしなんて、毎日深夜帰りだから、コンビニ弁当ばっかり食べてるよ。	Oh, your workplace is also harsh, huh. I go home at midnight every day, and I've been surviving on bento boxes from the convenience store.	y
person 2	こころがささくれちゃうよね。わたし人と話すのが好きだから、今日あなたと会えてうれしい。	Your heart gets frayed, doesn't it? I love talking to people, so I'm happy that I met you today.	y
person 1	そんな風に言ってもらえると、こっちも嬉しいよ。そうだ、最近はコンビニスイーツがかなり美味しいって知ってる？	Hearing you say that makes me happy, too. Oh yeah, did you know that desserts from the convenience store are really good nowadays?	y
person 2	そうなの？今度仕事帰りに買ってみるね！教えてくれてありがとう！	Really? I'll buy some next time I'm on my way home! Thanks for letting me know!	y
person 1	いえいえ！家の近くにコンビニがあるから、しょっちゅうチェックしてるんだ。コンビニスイーツに目がなくて！	No worries! There's a convenience store near my house, so I check them out all the time. I'm a sucker for convenience store desserts!	y
person 2	スイーツが好きなんだね！わたしは変かもしれないけど雨の日が好きなんだ。	You love desserts, huh! This may sound weird, but I like rainy days.	y
person 1	へえ、それって珍しいよね。なんか理由でもあるの？	Oh, that's quite unusual. Is there a reason behind that?	y
person 2	特に理由はないんだけど雨の音を聞きながらぼーっと飼っているハムスターを眺めるのが落ち着くんだ。	Not in particular, but I like spacing out while listening to the sound of rainfall and watching my hamster. That makes me feel relaxed.	y
