# Supplementary material
Source: ML conference proceedings conference paper supplement (https://aclanthology.org/2022.eval4nlp-1.9)
Supplement: SupplementaryMaterial [file 0164.xlsx]

## Sheet: Sheet1
person	source	translation	evaluation: is this a good translation?
person 1	こんにちは。最近のお仕事などの調子はどうですか？	Hello. How's your work been lately?	y
person 2	まずまずです。医療関係の仕事をしています。	It's going okay. I work in the medical field.	y
person 1	そうなんですか。わたしは旅行代理店勤務なんですが、お互いに大変ですよね。	I see. I work at a travel agency. Sounds like we're both having tough times, huh.	y
person 2	大変です。私は虫歯があるのですが、歯医者に行くのもおっくうです。	It sure is tough, all right. I have a cavity, but it's so troublesome to go visit the dentist.	y
person 1	それはいけませんよ、早く行ったほうがいいです。といっても、わたしは歯並びが良いのであまり歯科医には縁がないんですが。	That's no good. You should go there soon. Although, I really don't go to the dentist much since I have evenly lined teeth.	y
person 2	羨ましい。私は歯並びが悪いのです。	I'm jealous. My teeth are messed up.	y
person 1	わたしは口が大きいので、ちょっと笑っただけで歯が見えてしまうんですよね。歯並びが良くて助かりました。ところで、お仕事がお休みの日は、趣味などをなさるんですか？	I have a huge mouth so even if I smile a little, my teeth show. Having evenly lined teeth has been a real boon. By the way, do you do anything, like hobbies, on your days off from work?	y
person 2	私はあまり活動的ではないので、のんびりしています。あなたは？	I'm not very active so I just chill out. How about you?	y
person 1	わたしは人を喜ばせるのが大好きなんですよ。下手ですけれど、路上で大道芸の真似事をしています。	I love to make other people happy. I'm not that good at it, but I like to do a bit of street performance.	y
person 2	そうなんですか？そのような方は初めてです。	Really? I've never met anyone like you before.	y
