# Supplementary material
Source: ML conference proceedings conference paper supplement (https://aclanthology.org/2022.eval4nlp-1.9)
Supplement: SupplementaryMaterial [file 0164.xlsx]

## Sheet: Sheet1
person	source	translation	evaluation: is this a good translation?
person 1	こんにちは。最近のお仕事などの調子はどうですか？	Hello. How's your recent work?	y
person 2	まずまずです。医療関係の仕事をしています。	First of all, I'm working on a medical business.	n
person 1	そうなんですか。わたしは旅行代理店勤務なんですが、お互いに大変ですよね。	Well, I'm a travel shop, but we're both working for each other.	n
person 2	大変です。私は虫歯があるのですが、歯医者に行くのもおっくうです。	Oh, my God, I have a tooth, and I'm going to the dentist too.	n
person 1	それはいけませんよ、早く行ったほうがいいです。といっても、わたしは歯並びが良いのであまり歯科医には縁がないんですが。	I don't think that's a good idea, but I'd rather go quick, so I'm not even close to a dentist.	n
person 2	羨ましい。私は歯並びが悪いのです。	I'm sorry. I'm not jealous of teeth.	n
person 1	わたしは口が大きいので、ちょっと笑っただけで歯が見えてしまうんですよね。歯並びが良くて助かりました。ところで、お仕事がお休みの日は、趣味などをなさるんですか？	I'm just a little laughing because I can see my teeth grow up a little bit, so, uh, how did your work work work go?	n
person 2	私はあまり活動的ではないので、のんびりしています。あなたは？	Do I have a lot of work to do?	n
person 1	わたしは人を喜ばせるのが大好きなんですよ。下手ですけれど、路上で大道芸の真似事をしています。	I love to make people happy, but I do look like a bad street rat.	n
person 2	そうなんですか？そのような方は初めてです。	Is that the first time you've seen him?	n
