# Supplementary material
Source: ML conference proceedings conference paper supplement (https://aclanthology.org/2022.eval4nlp-1.9)
Supplement: SupplementaryMaterial [file 0165.xlsx]

## Sheet: Sheet1
person	source	translation	evaluation: is this a good translation?
person 1	こんにちは！私はブライダル関係の仕事をしています。あなたは何かお仕事をされていますか？	Hi, I'm working on Bryant's relationship?	n
person 2	はい、わたしはアパレル系の仕事をしているんです。ブライダルのドレスは手がけていないんですけどね。	Yes, I'm working on the Aegon system, but the bridal dress didn't work.	n
person 1	そうですか。ではファッションには興味がおありですね。	Well, you're interested in fashion.	n
person 2	もちろんです！でも、スティーブ・ジョブズにも憧れているんですよ。彼ってただスマホやコンピューターを作っただけじゃなくて、ライフスタイル全般の提案を行ったところがファッションに通じているんです。	Of course, but he just wanted to build all his style, not just Steve Joliet and his sex computer.	n
person 1	なるほど。伝説の人物ですね。ところで、趣味などはお持ちですか？	Well, you're a legend, so what do you have to do with your hobby?	n
person 2	趣味と呼べるほどのものはないですね。住んでいるのが寮で狭いので、スマホくらいしかすることがないんです。庭付きの一軒家に住めれば、いろいろできるんでしょうけど。	Well, there's not much to call it, but there's only a few houses in the house that can live in a small house where you live.	n
person 1	寮にお住まいですか。いろいろと苦労があるのでしょうね。	You live in your dormitories, don't you?	n
person 2	そうなんですよ、お給料が安くてやってられません。でも、寮のそばに公園があるので、ぼんやりしながら草木を眺めると、ストレス発散になるんです。	Yes, but you can't afford to pay for it, because there's a lot of stress between the trees and the dormitory.	n
person 1	私は雨の日が好きなんです。自然を眺めるとほっとしますよね。	I love the rain so much, I like it when it comes out.	n
person 2	雨の日って、晴れた日とはまた違った風情がありますからね。そういえば、あなたは何かご趣味があるんですか？	What if there was something different about the rain that was so different?	n
