# Supplementary material
Source: ML conference proceedings conference paper supplement (https://aclanthology.org/2022.eval4nlp-1.9)
Supplement: SupplementaryMaterial [file 0165.xlsx]

## Sheet: Sheet1
person	source	translation	evaluation: is this a good translation?
person 1	こんにちは！私はブライダル関係の仕事をしています。あなたは何かお仕事をされていますか？	Hello! I do bridal-related work. What do you do?	y
person 2	はい、わたしはアパレル系の仕事をしているんです。ブライダルのドレスは手がけていないんですけどね。	Well, I work in the apparel industry. Although my company doesn't deal with bridal dresses.	y
person 1	そうですか。ではファッションには興味がおありですね。	I see. I suppose you have an interest in fashion, then.	y
person 2	もちろんです！でも、スティーブ・ジョブズにも憧れているんですよ。彼ってただスマホやコンピューターを作っただけじゃなくて、ライフスタイル全般の提案を行ったところがファッションに通じているんです。	Of course! But I also admire Steve Jobs. He didn't just make smartphones and computers, he also proposed a whole way of living, and that relates to fashion.	y
person 1	なるほど。伝説の人物ですね。ところで、趣味などはお持ちですか？	I see. He is a legendary man. By the way, do you have any hobbies?	y
person 2	趣味と呼べるほどのものはないですね。住んでいるのが寮で狭いので、スマホくらいしかすることがないんです。庭付きの一軒家に住めれば、いろいろできるんでしょうけど。	Not anything that I can call a hobby. The dorm I live in is small, so the only thing I can do there is look at my smartphone. I bet I could do lots of things if I lived in a house with a garden.	y
person 1	寮にお住まいですか。いろいろと苦労があるのでしょうね。	You live in a dorm, huh? You must have a bunch of difficulties.	y
person 2	そうなんですよ、お給料が安くてやってられません。でも、寮のそばに公園があるので、ぼんやりしながら草木を眺めると、ストレス発散になるんです。	Exactly. And my wage is so low, I can't do anything about it. But there's a park near the dorm and when I space out while watching the plants there, I feel relieved from stress.	y
person 1	私は雨の日が好きなんです。自然を眺めるとほっとしますよね。	I like rainy days. Watching nature relax you, doesn't it?	y
person 2	雨の日って、晴れた日とはまた違った風情がありますからね。そういえば、あなたは何かご趣味があるんですか？	Yeah, rainy days have a different type of elegance to sunny days. By the way, do you have any hobbies?	y
