# Supplementary material
Source: ML conference proceedings conference paper supplement (https://aclanthology.org/2022.eval4nlp-1.9)
Supplement: SupplementaryMaterial [file 0166.xlsx]

## Sheet: Sheet1
person	source	translation	evaluation: is this a good translation?
person 1	こんにちは。わたしは医療関係で働いてるんですけど、あなたは？	Hello. I work in the medical field. How about you?	y
person 2	私は空港会社に勤務しています。	I work at an airport company.	y
person 1	そうなんですか！空港会社に勤務だなんて、すごいですね。わたし、虫歯があるんですけど、虫歯があると飛行機に乗れないって言われました。本当かな？	Is that so! Working for an airport company, huh? That's great. I have a cavity right now, and I was told I can't go on an airplane while I have one. Is that true?	y
person 2	うーん、それは聞いたことはないです。痛み止めのお薬を持ち込めば安心できると思います。	Um, I haven't heard that before. I think you'd be alright if you took some painkillers with you.	y
person 1	そうなんですね。それなら良かった～！わたし、歯並びも悪くって。歯医者に行けって言われてるけど、怖くって行けないんですよ。	I see. I'm glad to hear that! My teeth are lined unevenly, too. People tell me to go to the dentist, but I'm too afraid to go there.	y
person 2	分かります。しかし、早めに行かれたほうがショックも少ないかもしれませんね。	I understand that feeling. But it might be less of a shock the sooner you go.	y
person 1	やっぱりそうなんですかね～。頑張って、行ってみようかな？ところで、尊敬する人とか憧れてる人とかっています？	Do you think so? Maybe I'll get myself together and visit a dentist. By the way, do you have anyone you respect or admire?	y
person 2	います。職場に素敵な先輩がいるのです。	Yes. one of my senior colleagues is a lovely person.	y
person 1	そうなんですか？わたしはナイチンゲールを尊敬してるんですけど、その素敵な先輩って、わたしの尊敬の念とは違う感じの憧れですか？	Oh, really? I respect Florence Nightingale. Do you admire that lovely senior colleague in a different way to the way I respect Florence Nightingale?	y
person 2	ハプニングがあっても臨機応変に対応できる先輩です。ナイチンゲールみたいな人物ではないかもしれないけど。	The senior colleague I admire can deal with any situation even if an accident occurs, although they might not be like Florence Nightingale.	n
