# Supplementary material
Source: ML conference proceedings conference paper supplement (https://aclanthology.org/2022.eval4nlp-1.9)
Supplement: SupplementaryMaterial [file 0166.xlsx]

## Sheet: Sheet1
person	source	translation	evaluation: is this a good translation?
person 1	こんにちは。わたしは医療関係で働いてるんですけど、あなたは？	Hi. I work for the medical company, but you?	y
person 2	私は空港会社に勤務しています。	I work at the airport.	n
person 1	そうなんですか！空港会社に勤務だなんて、すごいですね。わたし、虫歯があるんですけど、虫歯があると飛行機に乗れないって言われました。本当かな？	Well, that's great, because I'm working for the airport company, and I'm not supposed to have teeth, am I?	n
person 2	うーん、それは聞いたことはないです。痛み止めのお薬を持ち込めば安心できると思います。	Well, I've never heard that before, but if you take the pain pills, you'll be fine.	y
person 1	そうなんですね。それなら良かった～！わたし、歯並びも悪くって。歯医者に行けって言われてるけど、怖くって行けないんですよ。	Well, that's good, 'cause I'm afraid of being a dentist too, too.	n
person 2	分かります。しかし、早めに行かれたほうがショックも少ないかもしれませんね。	I know, but it might be a little too soon to get upset.	y
person 1	やっぱりそうなんですかね～。頑張って、行ってみようかな？ところで、尊敬する人とか憧れてる人とかっています？	Are you sure you want to go with someone who loves you, by the way?	n
person 2	います。職場に素敵な先輩がいるのです。	I have a very nice senior at work.	y
person 1	そうなんですか？わたしはナイチンゲールを尊敬してるんですけど、その素敵な先輩って、わたしの尊敬の念とは違う感じの憧れですか？	Well, I respect Niobe, but you don't like that, do you?	n
person 2	ハプニングがあっても臨機応変に対応できる先輩です。ナイチンゲールみたいな人物ではないかもしれないけど。	Some of them may be crazy, but some of them might be able to argue with their esteem.	n
