# Supplementary material
Source: ML conference proceedings conference paper supplement (https://aclanthology.org/2022.eval4nlp-1.9)
Supplement: SupplementaryMaterial [file 0167.xlsx]

## Sheet: Sheet1
person	source	translation	evaluation: is this a good translation?
person 1	こんにちは！私はアパレル系の会社で働いています。あなたはお仕事をされていますか？	Hello?	n
person 2	わたしは今、在宅で仕事をしています。ところで、アパレルの方にお伺いしたいんですが、肩幅が広い服ってあんまり作らないんですか？わたし、肩幅広くて困ってるんですよー。	I'm working at the Archives' company right now, so you want me to tell you how much trouble I'm making in my shoulder?	n
person 1	ブランドにもよるかと思います。同じブランドでも、スリムな方向け、ぽっちゃりさん向けと両方あったりします。	I think the same brand as the same officer, the same way as the same officer, the same way.	n
person 2	そうなんですね！じゃぁそういうブランドを探せば良いのかぁ。ありがとうございます！	Well, thank you for looking for that brand!	n
person 1	お仕事がお休みの時は、どんなことをされるのですか？	What will you do when you're at work?	n
person 2	仕事が休みの時は、風景を眺めたりして、目を休ませてますね。わたし、雪が好きなので、雪景色が一番好きです。	When you watch the landscape, I like the snow most because I love the snow most.	n
person 1	雪景色は私も大好きです。私は公園のそばに住んでいるので、公園を眺めるのが好きなんです。	I love to live next to the park too.	n
person 2	そうなんですか？公園かぁ、その眺めも楽しそうですね！わたし、いつか平屋に住んでみたいんです。そしたら、庭とかきれいにして、いつも景色を楽しめますし。	Well, I'd like to live in that park someday, and I'd like to live in a nice garden and have fun.	n
person 1	私も庭付きの家に住んでみたいです。ハードルは高いのですが。	I always enjoy living in Hertfordshire as much as I do.	n
person 2	ほんとですね～。庭付きの家なんて、たくさんお金を貯めなきゃですもんね！話変わりますが、わたし、2月生まれなんです。しかも、うるう年の。	Really, I have to save a lot of money in the middle of the month, and I have to go back to the moon!	n
