# Supplementary material
Source: ML conference proceedings conference paper supplement (https://aclanthology.org/2022.eval4nlp-1.9)
Supplement: SupplementaryMaterial [file 0167.xlsx]

## Sheet: Sheet1
person	source	translation	evaluation: is this a good translation?
person 1	こんにちは！私はアパレル系の会社で働いています。あなたはお仕事をされていますか？	Hello! I work at a clothing company. Do you work?	y
person 2	わたしは今、在宅で仕事をしています。ところで、アパレルの方にお伺いしたいんですが、肩幅が広い服ってあんまり作らないんですか？わたし、肩幅広くて困ってるんですよー。	I'm working from home right now. Say, I wanted to ask this to a person working in a clothing company, but don't you make many clothes for people with wide shoulders? I've got wide shoulders and it causes me no end of problems.	n
person 1	ブランドにもよるかと思います。同じブランドでも、スリムな方向け、ぽっちゃりさん向けと両方あったりします。	I think it depends on the brand. Even when it's the same brand, there can be clothes for both slender people and chubby people.	y
person 2	そうなんですね！じゃぁそういうブランドを探せば良いのかぁ。ありがとうございます！	I see! Then I guess I should look for a brand like that. Thank you!	y
person 1	お仕事がお休みの時は、どんなことをされるのですか？	What do you do when you have days off from work?	y
person 2	仕事が休みの時は、風景を眺めたりして、目を休ませてますね。わたし、雪が好きなので、雪景色が一番好きです。	When I'm not working, I like to look at the scenery and rest my eyes. I love the snow so I like snowscapes the best.	y
person 1	雪景色は私も大好きです。私は公園のそばに住んでいるので、公園を眺めるのが好きなんです。	I love snowscapes, too. I live near a park and I like looking at it.	y
person 2	そうなんですか？公園かぁ、その眺めも楽しそうですね！わたし、いつか平屋に住んでみたいんです。そしたら、庭とかきれいにして、いつも景色を楽しめますし。	Oh yeah? A park, huh? That kind of scenery sounds good, too! Eventually, I want to live in a bungalow. Then I can make my garden pretty and enjoy nice scenery any time.	y
person 1	私も庭付きの家に住んでみたいです。ハードルは高いのですが。	I also want to live in a house with a garden. Although it'd be difficult to achieve.	y
person 2	ほんとですね～。庭付きの家なんて、たくさんお金を貯めなきゃですもんね！話変わりますが、わたし、2月生まれなんです。しかも、うるう年の。	I know right? You have to save a lot of money to get a house with a garden! This is off-topic, but I was born in February, in a leap year, no less.	y
