# Supplementary material
Source: ML conference proceedings conference paper supplement (https://aclanthology.org/2022.eval4nlp-1.9)
Supplement: SupplementaryMaterial [file 0168.xlsx]

## Sheet: Sheet1
person	source	translation	evaluation: is this a good translation?
person 1	こんにちは！あ、こんばんは、かな？今、海外からのフライトの帰りで、時差ボケがひどくって。	Good evening, sir.	n
person 2	海外ですか！すごいですね！私はジムで泳いだ帰りです。	Are you overseas? I swim back in Jim's gym!	n
person 1	へえ、アクティブで素敵じゃない。わたしの年の離れた姉も、毎日のようにジムに行って、鍛えてるわよ。	Oh, it's not an imprint, my old sister has been trained to run away every day like Jim.	n
person 2	いいですね、私も毎日行きたいのですが、大手電機メーカーで働いていて時間があまり取れず、です。	I'd like to work very hard every day, but I don't have much time to go to work with a giant engineer.	n
person 1	ああ、それは大変そうなお仕事ね。でも、日本にずっといるなら、日本食が毎日食べれるって幸せなことだと思うわ！	Oh, that would be a great day to eat in Japan every day, but I'd be happy to eat in Japan!	n
person 2	同感です！私も日本食が大好きなので。	I agree. I love Japanese food too.	y
person 1	日本食といえば、あなたは何が一番好き？わたしは、母の作る生姜焼きが一番好きなの！これを食べると日本に帰ってきたーって実感するの。	If you say you like Japanese food, I come back to Japan and eat this the most!	n
person 2	母の味なんですね。私はお味噌汁とか煮びたしが好きですね。	My mother's taste is delicious. I like it.	n
person 1	ザ、日本食って感じで、染みるわねー。ところで、あなた、尊敬する人とか職場にいる？	I don't feel like Japanese food, so are you working for people who respect you?	n
person 2	いますいます！松下幸之助に憧れて電機メーカーに入ったぐらいですから！	I'm starving now because I'm in the middle of a soaring machine!	n
