# Supplementary material
Source: ML conference proceedings conference paper supplement (https://aclanthology.org/2022.eval4nlp-1.9)
Supplement: SupplementaryMaterial [file 0168.xlsx]

## Sheet: Sheet1
person	source	translation	evaluation: is this a good translation?
person 1	こんにちは！あ、こんばんは、かな？今、海外からのフライトの帰りで、時差ボケがひどくって。	Hello! Oh, or maybe it's a good evening? I just got off a flight from overseas and my jetlag's pretty bad.	y
person 2	海外ですか！すごいですね！私はジムで泳いだ帰りです。	From overseas, huh! Wow! I just came back from swimming at the gym!	y
person 1	へえ、アクティブで素敵じゃない。わたしの年の離れた姉も、毎日のようにジムに行って、鍛えてるわよ。	Wow, I think that's wonderful that you're active. I have a sister who's much older than I am and she goes to the gym and trains almost every day.	y
person 2	いいですね、私も毎日行きたいのですが、大手電機メーカーで働いていて時間があまり取れず、です。	That's nice. I wish I could go there every day too, but I work at a big electrical manufacturer and I don't get a lot of time off.	y
person 1	ああ、それは大変そうなお仕事ね。でも、日本にずっといるなら、日本食が毎日食べれるって幸せなことだと思うわ！	Oh, that sounds like a tough job! But as long as you're in Japan, I think you can be happy because you can eat Japanese food every day!	y
person 2	同感です！私も日本食が大好きなので。	I agree! I love Japanese food as well.	y
person 1	日本食といえば、あなたは何が一番好き？わたしは、母の作る生姜焼きが一番好きなの！これを食べると日本に帰ってきたーって実感するの。	Speaking of Japanese food, what do you like the best? I love the pork and ginger saute that my mother makes the most! When I eat it, I feel that I've come back to Japan.	y
person 2	母の味なんですね。私はお味噌汁とか煮びたしが好きですね。	So it's the taste of home for you, huh. I love miso soup and stewed vegetables.	y
person 1	ザ、日本食って感じで、染みるわねー。ところで、あなた、尊敬する人とか職場にいる？	Oh, man. Those are such orthodox Japanese foods. By the way, do you have anyone you respect in your workplace?	y
person 2	いますいます！松下幸之助に憧れて電機メーカーに入ったぐらいですから！	Yes, I do! I decided to work for an electrical manufacturer because I admired Konosuke Matsushita!	y
