# Supplementary material
Source: ML conference proceedings conference paper supplement (https://aclanthology.org/2022.eval4nlp-1.9)
Supplement: SupplementaryMaterial [file 0169.xlsx]

## Sheet: Sheet1
person	source	translation	evaluation: is this a good translation?
person 1	こんにちは。調子はいかがですか？	Hello. How are you doing?	y
person 2	はい、おかげさまで。肌が白いので、具合が悪そうに見えるみたいですけど、ご心配なく！	Fine, thanks. My skin is so pale that I look ill, but not to worry!	y
person 1	肌が白いのですか？雪国のご出身でしょうか！私は雪が好きなのですよ。	Your skin is pale? Are you from the snow country?! I love the snow, you see.	y
person 2	いえ、東京の出身なんですけど、化粧品メーカーに勤めてるので、美白に力を入れてるんです。	No, I'm from Tokyo, but I work at a cosmetic manufacturer so I'm putting an effort into keeping my skin pale.	y
person 1	わあ、それは美肌ということですね！うらやましいです！	Wow, so you mean you have beautiful skin, huh! I'm jealous!	y
person 2	でもねえ、顔立ちが幼いからか、化粧がどうにも似合わない気がするんです。あなたは、そんなことないですか？	But, my face looks rather young, and I don't feel like make-up suits me somehow. Don't you feel like that sometimes?	y
person 1	私は化粧うんぬん以前に、肩幅が広くてかわいくないんです・・・	Before I can say anything about make-up, first of all I've got such wide shoulders, I don't look cute...	y
person 2	えー！肩幅が広いと、猫背のわたしと違って、洋服がかっこよく着こなせそう。服には興味がないんですか？	What! Unlike me who has a hunched back, I think if you have wide shoulders then clothes suit you better. Aren't you interested in clothes?	y
person 1	似合うお洋服がなかなか見つからないですよ！	I can't seem to find clothes that suit me much!	y
person 2	それは女性としては辛いですよね。普段、お仕事はされてるんでしたっけ？	That's difficult as a woman, isn't it? Are you usually working?	y
