# Supplementary material
Source: ML conference proceedings conference paper supplement (https://aclanthology.org/2022.eval4nlp-1.9)
Supplement: SupplementaryMaterial [file 0169.xlsx]

## Sheet: Sheet1
person	source	translation	evaluation: is this a good translation?
person 1	こんにちは。調子はいかがですか？	Hello, how are you?	y
person 2	はい、おかげさまで。肌が白いので、具合が悪そうに見えるみたいですけど、ご心配なく！	Well, thanks to you, your skin looks like white, but don't worry!	n
person 1	肌が白いのですか？雪国のご出身でしょうか！私は雪が好きなのですよ。	Do you love snow from the white country?	n
person 2	いえ、東京の出身なんですけど、化粧品メーカーに勤めてるので、美白に力を入れてるんです。	No, I'm from Tokyo, but I work in white suits.	n
person 1	わあ、それは美肌ということですね！うらやましいです！	Oh, that's so beautiful!	n
person 2	でもねえ、顔立ちが幼いからか、化粧がどうにも似合わない気がするんです。あなたは、そんなことないですか？	But you don't feel that way, do you?	n
person 1	私は化粧うんぬん以前に、肩幅が広くてかわいくないんです・・・	I'm a little rusty in front of my makeup, but it's not that bad.	n
person 2	えー！肩幅が広いと、猫背のわたしと違って、洋服がかっこよく着こなせそう。服には興味がないんですか？	Don't you care if I'm not as tall as I am?	n
person 1	似合うお洋服がなかなか見つからないですよ！	I can't find my clothes!	n
person 2	それは女性としては辛いですよね。普段、お仕事はされてるんでしたっけ？	It's hard for a woman to do business normally, isn't it?	n
