# Supplementary material
Source: ML conference proceedings conference paper supplement (https://aclanthology.org/2022.eval4nlp-1.9)
Supplement: SupplementaryMaterial [file 0170.xlsx]

## Sheet: Sheet1
person	source	translation	evaluation: is this a good translation?
person 1	こんにちは！最近はお元気でしたか？	Hi. How are you today?	n
person 2	こんにちは、新聞社勤めなので働き詰めで少し疲れています。あなたは元気？	Hi, I work for the newspaper. How are you doing?	n
person 1	いえ、わたしも元気なんですがちょっと疲れてきましたね。大手電機メーカー勤務なんです。	No, I'm tired, too, but you're working a little hard.	n
person 2	お互いお疲れ様ですよね。	Thanks for your help.	n
person 1	ええ、疲れた時はジムのプールで泳ぎます。プールの塩素の匂いって、昔なつかしい感じがするんです。	Yeah, when I was tired, I'd swim in the swimming pool in Jim's pool.	n
person 2	小学生のころを思い出しますよね。わたし離婚歴があってⅮinkS夫婦なんです。	Remember when I was a kid, I had a divorce with a couple of months ago.	n
person 1	そうですか、でも今のご家庭は幸せなんですよね？うらやましい限りです。	Yeah, but as long as your family is happy, you're happy now, right?	n
person 2	それがそうでもなくって。わたし人から地獄耳ってよく言われるんですけど、夫がわたしの悪口をつぶやいているのをきいちゃったんです。	That's not what I'm saying, but my husband used to say I was talking to people about prison.	n
person 1	ああ、それはいけませんね。旦那様と話し合ったほうがいいんじゃないでしょうか？	Well, that shouldn't be a good time to talk to your husband, wouldn't it?	n
person 2	やっぱりそうですよね、週末にでも話し合ってみます。	Yes, but we'll talk about it this weekend.	y
