# Supplementary material
Source: ML conference proceedings conference paper supplement (https://aclanthology.org/2022.eval4nlp-1.9)
Supplement: SupplementaryMaterial [file 0170.xlsx]

## Sheet: Sheet1
person	source	translation	evaluation: is this a good translation?
person 1	こんにちは！最近はお元気でしたか？	Hello! How have you been lately?	y
person 2	こんにちは、新聞社勤めなので働き詰めで少し疲れています。あなたは元気？	Hello. I work at a newspaper company and I'm a bit tired from working too much. How are you?	y
person 1	いえ、わたしも元気なんですがちょっと疲れてきましたね。大手電機メーカー勤務なんです。	Well, I'm doing all right but I've been feeling a bit tired. I work for an electrical manufacturer.	y
person 2	お互いお疲れ様ですよね。	We're both having a tiring time, aren't we?	y
person 1	ええ、疲れた時はジムのプールで泳ぎます。プールの塩素の匂いって、昔なつかしい感じがするんです。	Yes. When I feel tired I go to the gym to take a swim in the pool. The smell of chlorine from the swimming pool makes me nostalgic about the past.	y
person 2	小学生のころを思い出しますよね。わたし離婚歴があってⅮinkS夫婦なんです。	You remember the times when you were in elementary school, don't you? I've been divorced before and I'm in a DINKs marriage now.	y
person 1	そうですか、でも今のご家庭は幸せなんですよね？うらやましい限りです。	I see. But you're happy in your current family, right? I'm so jealous of that.	y
person 2	それがそうでもなくって。わたし人から地獄耳ってよく言われるんですけど、夫がわたしの悪口をつぶやいているのをきいちゃったんです。	Well, not really, actually. People tell me I've got sharp ears, and I heard my husband talking behind my back.	y
person 1	ああ、それはいけませんね。旦那様と話し合ったほうがいいんじゃないでしょうか？	Oh, that's no good. Perhaps you should talk to him about it?	y
person 2	やっぱりそうですよね、週末にでも話し合ってみます。	Yeah, I think so too. I'll talk to him about it this weekend.	y
