# Supplementary material
Source: ML conference proceedings conference paper supplement (https://aclanthology.org/2022.eval4nlp-1.9)
Supplement: SupplementaryMaterial [file 0171.xlsx]

## Sheet: Sheet1
person	source	translation	evaluation: is this a good translation?
person 1	こんにちはー、わたしは有名な化粧品メーカー勤務です。	Hello, I work at a famous cosmetic company.	y
person 2	そうなんですね！わたしはテレビ業界に勤務しているので、いつもお世話になっています。	Oh really? I work in the television industry, so we often rely on you.	y
person 1	もしかしたらうちの化粧品のCMとか作って頂いてるのかもですね。今日お布団を天日干ししたんですけど懐かしくかんじちゃいました。	You may have made some commercials for our products before. I hung my futon out in the sun today and it felt nostalgic.	y
person 2	布団ですか、太陽の匂いみたいなものがしますからね。ご自宅はどちらですか？	Your futon? Right, because then it smells fresh like sunshine. Where do you live?	n
person 1	自宅は都心から少し離れたとこなんです。あなたはどちらに？	I live just outside the heart of the city. How about you?	y
person 2	そうなんですね、わたしは仕事柄、いつでも局に行ける都心のマンションです。気楽な独身貴族ってやつですよ。	Me? For work, I live in an apartment downtown so that I can get to the station at any time. I'm carefree and enjoying being single.	n
person 1	都心羨ましいです。わたし顔立ちが幼くて猫背のせいか人によくなめられるんです。	I'm jealous you live downtown. Perhaps because of my baby face and rounded shoulders, a lot of people tend to take me lightly.	n
person 2	わかります。でも、背筋を伸ばすだけで印象はだいぶ変わりますよ！わたしなんて、肌の色が濃いのでなかなか印象を変えられません。	I understand. But, just by straightening out your back, you can change your demeanor! In my case, I have quite dark skin and so I can't really do anything about it.	y
person 1	わたしは反対に肌の色が白いのが悩みなんです。	I'm the opposite. I'm worried my skin is too pale.	y
person 2	そうなんですか？白い肌って憧れだと思いますよ。失礼ですが、珍しいですね。	Is that so? I think fair skin is desirable. Not to be rude, but it's quite rare.	n
person 1	白いを通り越して青白いのかも、だから健康的な肌の色はあこがれなんです。結局はないものねだりなんですかね？	I may be more pale than white, so I think a more healthy looking skin color is desirable. I guess everyone wants what they don't have.	y
person 2	いやいや、芸能人だって努力してスタイルやら顔なんかを手に入れていますから！がんばってください。	Not at all, even famous people work hard to take care of their face and body! Please do your best.	y
