# Supplementary material
Source: ML conference proceedings conference paper supplement (https://aclanthology.org/2022.eval4nlp-1.9)
Supplement: SupplementaryMaterial [file 0171.xlsx]

## Sheet: Sheet1
person	source	translation	evaluation: is this a good translation?
person 1	こんにちはー、わたしは有名な化粧品メーカー勤務です。	- Hi, I work for the famous pair of makeup maker.	n
person 2	そうなんですね！わたしはテレビ業界に勤務しているので、いつもお世話になっています。	Yeah, well, I've been working on television all day.	n
person 1	もしかしたらうちの化粧品のCMとか作って頂いてるのかもですね。今日お布団を天日干ししたんですけど懐かしくかんじちゃいました。	Maybe it's my makeup or something, but it's been dry all day.	n
person 2	布団ですか、太陽の匂いみたいなものがしますからね。ご自宅はどちらですか？	Which smell of the sun, sir?	n
person 1	自宅は都心から少し離れたとこなんです。あなたはどちらに？	Home is a little out of the city. Where are you going?	n
person 2	そうなんですね、わたしは仕事柄、いつでも局に行ける都心のマンションです。気楽な独身貴族ってやつですよ。	Well, I'm always the handsomest housewife in the city where I can go to work.	n
person 1	都心羨ましいです。わたし顔立ちが幼くて猫背のせいか人によくなめられるんです。	It's a shame I've been growing up with someone tall and tall.	n
person 2	わかります。でも、背筋を伸ばすだけで印象はだいぶ変わりますよ！わたしなんて、肌の色が濃いのでなかなか印象を変えられません。	I know, but I can't change my skin so hard, so I can't change my skin!	n
person 1	わたしは反対に肌の色が白いのが悩みなんです。	I have white eyes on my face.	n
person 2	そうなんですか？白い肌って憧れだと思いますよ。失礼ですが、珍しいですね。	I'm sorry, I think it's a white skin, but it's rare, isn't it?	n
person 1	白いを通り越して青白いのかも、だから健康的な肌の色はあこがれなんです。結局はないものねだりなんですかね？	So maybe you can cross the white side and put your healthy skin in the air after all, and then you'll be fine?	n
person 2	いやいや、芸能人だって努力してスタイルやら顔なんかを手に入れていますから！がんばってください。	No, no, no, no, no, no, no, no, no, no, no, no, no, no, no, no!	n
