# Supplementary material
Source: ML conference proceedings conference paper supplement (https://aclanthology.org/2022.eval4nlp-1.9)
Supplement: SupplementaryMaterial [file 0172.xlsx]

## Sheet: Sheet1
person	source	translation	evaluation: is this a good translation?
person 1	どうもどうも。いやあ、最近、どうされてました？	Hello. How are things lately?	y
person 2	就職しました！念願のゲーム製作会社なんです！	I got my dream job at a game developing company!	y
person 1	おめでとう！念願ってことは、もともとゲーム好きだったの？	Congratulations! If it was your dream job, does that mean you liked games before?	y
person 2	はい、ゲーム好きなアニメオタクで漫研にも入っていましたよ！	Yes, I was a game and anime nerd, I was even in the manga club!	y
person 1	へー！それじゃ、天職って感じだね。天職といえば、わたしもそうだよ。周りから地獄耳って言われてて、新聞社で働いてるんだから。	Wow! Then your job must be perfect for you. Speaking of which, the same goes for me. People tell me I'm good at picking up gossip, and I work at a newspaper company.	y
person 2	すごい！新聞社ですか！インテリっぽくてかっこいいです！	Wow! A newspaper company? That sounds so cool and intelligent!	y
person 1	そうだけどさ、忙しいから、1人目の妻には逃げられちゃった。	Yeah, but it's busy, so my first wife left me.	y
person 2	ひゃー、それは悲しいですね。今はご家族はいらっしゃらないのですか？	Ah, that's sad. Do you have a family now?	n
person 1	あ、2度目の結婚をしてるんだよ。子どもはいないからDINKsだけどね。あなたは？	Yeah, I'm in my second marriage. We don't have any kids, so we're a DINK family. How about you?	y
person 2	じゃあ、寂しくはないですね。私は一人っ子でまだ実家暮らしです。	So then you're not lonely. I'm a single child still living at home with my parents.	y
