# Supplementary material
Source: ML conference proceedings conference paper supplement (https://aclanthology.org/2022.eval4nlp-1.9)
Supplement: SupplementaryMaterial [file 0172.xlsx]

## Sheet: Sheet1
person	source	translation	evaluation: is this a good translation?
person 1	どうもどうも。いやあ、最近、どうされてました？	Thank you very much. What have you been up to lately?	y
person 2	就職しました！念願のゲーム製作会社なんです！	I got a job! I got a job!	n
person 1	おめでとう！念願ってことは、もともとゲーム好きだったの？	Congratulations. Did you like playing games before?	n
person 2	はい、ゲーム好きなアニメオタクで漫研にも入っていましたよ！	Yes, I was in love with my favorite game, too!	n
person 1	へー！それじゃ、天職って感じだね。天職といえば、わたしもそうだよ。周りから地獄耳って言われてて、新聞社で働いてるんだから。	Well, I feel like I'm in the middle of a job, too, so I'm in the middle of a newspaper, and I'm in the middle of a newspaper!	n
person 2	すごい！新聞社ですか！インテリっぽくてかっこいいです！	It's so cool!	n
person 1	そうだけどさ、忙しいから、1人目の妻には逃げられちゃった。	Yeah, but my first wife ran away.	n
person 2	ひゃー、それは悲しいですね。今はご家族はいらっしゃらないのですか？	It's sad, isn't your family here now?	y
person 1	あ、2度目の結婚をしてるんだよ。子どもはいないからDINKsだけどね。あなたは？	Oh, you're married again, aren't you?	n
person 2	じゃあ、寂しくはないですね。私は一人っ子でまだ実家暮らしです。	Well, I'm not lonely, and I live alone	n
