# Supplementary material
Source: ML conference proceedings conference paper supplement (https://aclanthology.org/2022.eval4nlp-1.9)
Supplement: SupplementaryMaterial [file 0173.xlsx]

## Sheet: Sheet1
person	source	translation	evaluation: is this a good translation?
person 1	こんにちは。お元気ですか？	Hello. How are you?	y
person 2	はい、元気いっぱい、早寝早起きがモットーで生きてますよ！	Yes, I'm fine, I'm going to sleep fast!	n
person 1	わたしも元気です。憧れの芸能人のことを想うと、多少辛いことがあっても耐えられるんです。	I'm fine, too, but I'm going to have a bit of a hard time getting up in the morality of an actor.	n
person 2	わあ、どの芸能人ですか？	Oh, which actor are you?	n
person 1	広末涼子が昔好きだったので、今も会えないかと思っているんです。テレビ業界で働いていますから。	I used to love the end of the year, so I don't think I'd ever see you again in the TV.	n
person 2	清潔感のある、でも元気なタイプの人ですね。素敵です！	She's beautiful, but she's beautiful!	n
person 1	そうなんですよ！妹がいるんですが、彼女とは違って地味で真面目なので、異なるタイプに憧れるのかもしれませんね。	Yes, she's got a sister, but she might be a different type of person.	n
person 2	そんなものなんですね。会えるといいですね！	I'm sure she'll see you!	n
person 1	はい、ありがとうございます。わたしは独身貴族ですが、ご家族いらっしゃいますか？	Yes, thank you, I'm single, but can I have a family?	n
person 2	実は独り身なんです。新聞配達員をしています。海沿いに住んでいるので、のんびり生活です。	Actually, I live in the middle of a newspaper, so I'm going to live in the ocean and I'm going to enjoy myself.	n
person 1	いいですね。わたしも肌の色が濃いので、海が似合うってたまに言われるんですよ。	And I'm going to say that my skin is so thick, my skin is going to be in the ocean sometimes.	n
person 2	サーファーのようにかっこいいのでしょうね！	You look like a surfer!	n
