# Supplementary material
Source: ML conference proceedings conference paper supplement (https://aclanthology.org/2022.eval4nlp-1.9)
Supplement: SupplementaryMaterial [file 0173.xlsx]

## Sheet: Sheet1
person	source	translation	evaluation: is this a good translation?
person 1	こんにちは。お元気ですか？	Hello. How are you?	y
person 2	はい、元気いっぱい、早寝早起きがモットーで生きてますよ！	I'm great. I live with the motto: early to bed, early to rise!	y
person 1	わたしも元気です。憧れの芸能人のことを想うと、多少辛いことがあっても耐えられるんです。	I'm doing well, too. When I think about my favorite entertainer, I can get through some tough times.	y
person 2	わあ、どの芸能人ですか？	Wow, which entertainer?	y
person 1	広末涼子が昔好きだったので、今も会えないかと思っているんです。テレビ業界で働いていますから。	I liked Hirosue Ryoko long ago, so I wonder if I can meet her now sometime since I work in the television industry.	y
person 2	清潔感のある、でも元気なタイプの人ですね。素敵です！	A very tidy yet energetic person. She's wonderful!	y
person 1	そうなんですよ！妹がいるんですが、彼女とは違って地味で真面目なので、異なるタイプに憧れるのかもしれませんね。	Right? I have a younger sister, but unlike her, she's quite plain and serious, so I may look up to the varying type.	n
person 2	そんなものなんですね。会えるといいですね！	That's right. Hopefully you can meet her!	n
person 1	はい、ありがとうございます。わたしは独身貴族ですが、ご家族いらっしゃいますか？	Yes, thank you. I'm an eligible bachelor, but have you got a family?	y
person 2	実は独り身なんです。新聞配達員をしています。海沿いに住んでいるので、のんびり生活です。	Actually I'm single. I work as a newspaper delivery person. I live close to the coast, so I live a life of leisure.	y
person 1	いいですね。わたしも肌の色が濃いので、海が似合うってたまに言われるんですよ。	That's nice. I have tan skin, so sometimes people tell me I'd look good on the beach.	y
person 2	サーファーのようにかっこいいのでしょうね！	I'm sure you'd look cool, like a surfer!	y
