# Supplementary material
Source: ML conference proceedings conference paper supplement (https://aclanthology.org/2022.eval4nlp-1.9)
Supplement: SupplementaryMaterial [file 0174.xlsx]

## Sheet: Sheet1
person	source	translation	evaluation: is this a good translation?
person 1	こんにちは。調子はいかがですか？	Hello. How are you?	y
person 2	まあまあといったところです。郵便局の仕事が忙しくて。	It's okay. I'm busy with the mail office.	n
person 1	郵便局ですか！私は最近、ゲーム制作会社に就職しました！	I've worked for the record agency recently!	n
person 2	それはすごいですね！わたしも暇な時にゲームをしますので、知らず知らずのうちにプレイしているかもしれません。	That's great because I don't even know when to play a game with you.	n
person 1	忙しくて疲れた時は、ぜひゲームでリラックスしてください！漫画もいいですよ。私はアニメオタクで漫研所属者でしたよ！	I was tired of playing cartoons when I was busy with the cartoons!	n
person 2	趣味を仕事に活かせているんですね。うらやましいです。でも、最近の3DCGリアルすぎません？わたしは高所恐怖症なので怖いんですが。	You're using your hobby to work, but I'm afraid of 3 years old.	n
person 1	ああ、確かに戦闘ものはリアルですね。あつ森とかはいかがですか？ポケモンとか。	Oh, yeah, I'm afraid of the real battle forest.	n
person 2	ポケモン好きでした！へび年生まれだからかな、へびみたいなやつが好きでよく使ってましたよ。	I liked it when you were born!	n
person 1	あれ可愛いですよね！私はカビゴンが好きですよ。	That's cute! I like Caracas!	n
person 2	懐かしいですねポケモン、最近やってませんが。年上の人に好かれるので、なかなか会話で世代が合わないんです。	It's been a long time since I've had a conversation with older people, but it's not that hard to talk about.	n
