# Supplementary material
Source: ML conference proceedings conference paper supplement (https://aclanthology.org/2022.eval4nlp-1.9)
Supplement: SupplementaryMaterial [file 0174.xlsx]

## Sheet: Sheet1
person	source	translation	evaluation: is this a good translation?
person 1	こんにちは。調子はいかがですか？	Hello. How are you feeling?	y
person 2	まあまあといったところです。郵便局の仕事が忙しくて。	I'm so-so. My job at the post office is busy.	y
person 1	郵便局ですか！私は最近、ゲーム制作会社に就職しました！	The post office? I recently got a new job at a game developing company!	y
person 2	それはすごいですね！わたしも暇な時にゲームをしますので、知らず知らずのうちにプレイしているかもしれません。	That's amazing! I play games when I have free time, so we may play together sometime without realizing it.	n
person 1	忙しくて疲れた時は、ぜひゲームでリラックスしてください！漫画もいいですよ。私はアニメオタクで漫研所属者でしたよ！	When you're busy and tired, why not play some games to relax! Manga is good, too. I'm an anime nerd and belonged to the manga club!	y
person 2	趣味を仕事に活かせているんですね。うらやましいです。でも、最近の3DCGリアルすぎません？わたしは高所恐怖症なので怖いんですが。	You're able to use your hobbies at work. I'm jealous. But isn't recent 3DCG too real? I'm scared of heights, so it's scary for me.	y
person 1	ああ、確かに戦闘ものはリアルですね。あつ森とかはいかがですか？ポケモンとか。	Yeah, war games are realistic. How about Animal Crossing? Or Pokemon.	y
person 2	ポケモン好きでした！へび年生まれだからかな、へびみたいなやつが好きでよく使ってましたよ。	I used to like Pokemon! I was born in the year of the snake, so I liked the snake pokemon and often used them.	y
person 1	あれ可愛いですよね！私はカビゴンが好きですよ。	Those are cute! I liked Snorlax.	y
person 2	懐かしいですねポケモン、最近やってませんが。年上の人に好かれるので、なかなか会話で世代が合わないんです。	Pokemon is so nostalgic, though I haven't played lately. I'm liked by older people, so our conversation topics don't often match.	y
