# Supplementary material
Source: ML conference proceedings conference paper supplement (https://aclanthology.org/2022.eval4nlp-1.9)
Supplement: SupplementaryMaterial [file 0175.xlsx]

## Sheet: Sheet1
person	source	translation	evaluation: is this a good translation?
person 1	こんにちは。最近どうですか？	Hello. How are you recently?	y
person 2	電車通勤がちょっと疲れますが元気です！	My train commute is a bit tiring but I'm fine!	y
person 1	電車通勤、うらやましいです。わたしは毎朝新聞配達していますよ。	I'm jealous you commute by train. I deliver newspapers every morning.	y
person 2	すごい！早起きしないといけないので体力勝負ですね。	Wow! You have to wake up early, so you need a lot of stamina.	y
person 1	ええ、早寝早起きが欠かせません。ただそのせいか、疲れはするものの健康状態はとてもいいんですよね。	Yes, I have to be early to bed and early to rise. Maybe because of that, I do get tired, yet I'm very healthy.	n
person 2	鍛えられているんですね。私は経理の仕事をしているので座りっぱなしなので腰痛がありますよ。	You're in good shape. Working in accounting, I'm always sitting down, so I have lower back pain.	y
person 1	ああ、何時間も座っていると嫌になりますよね本当に。気分転換は何かしますか？	Yeah, you really get tired after sitting for so many hours. Do you do anything for a change of pace?	y
person 2	休みが取れたときはキャンプに行くのが好きです！虫は苦手なんですが。	I like going camping when I can get time off. I don't like insects, though.	y
person 1	虫ですか、わたしの故郷にはたくさんいましたよ。海沿いの街で育ちましたので、虫も魚も、海の匂いも懐かしいですね。	Insects? There were a lot in my hometown. I grew up in a town on the coast, so insects, fish, and the smell of the ocean are nostalgic for me.	y
person 2	自然っていいですよね。私はまだ興味を持ったところなので、今からキャンプ製品を集めて、山や海にどんどん行きたいんです！	Nature is nice. I just got into it as a hobby, so I want to gather some camping supplies and head out into the mountains and to the beach!	y
