# Supplementary material
Source: ML conference proceedings conference paper supplement (https://aclanthology.org/2022.eval4nlp-1.9)
Supplement: SupplementaryMaterial [file 0175.xlsx]

## Sheet: Sheet1
person	source	translation	evaluation: is this a good translation?
person 1	こんにちは。最近どうですか？	Hello, how's it going?	y
person 2	電車通勤がちょっと疲れますが元気です！	I'm a little tired for a train job, but I'm fine!	n
person 1	電車通勤、うらやましいです。わたしは毎朝新聞配達していますよ。	I'm jealous of trains, and I'm delivering newspapers every morning.	n
person 2	すごい！早起きしないといけないので体力勝負ですね。	Great, because we have to get up fast.	n
person 1	ええ、早寝早起きが欠かせません。ただそのせいか、疲れはするものの健康状態はとてもいいんですよね。	Yeah, well, it's just a little tired to wake up sooner or later, or worse, that's all.	n
person 2	鍛えられているんですね。私は経理の仕事をしているので座りっぱなしなので腰痛がありますよ。	I've been working on my job since I've been in the middle of my job.	n
person 1	ああ、何時間も座っていると嫌になりますよね本当に。気分転換は何かしますか？	Oh, you're gonna be really embarrassed if you sit here for hours, huh?	n
person 2	休みが取れたときはキャンプに行くのが好きです！虫は苦手なんですが。	I don't like bugs when the rest of my day takes off!	n
person 1	虫ですか、わたしの故郷にはたくさんいましたよ。海沿いの街で育ちましたので、虫も魚も、海の匂いも懐かしいですね。	There were a lot of bugs in my home, so I've grown up in the ocean, and I've seen a lot of bugs.	n
person 2	自然っていいですよね。私はまだ興味を持ったところなので、今からキャンプ製品を集めて、山や海にどんどん行きたいんです！	No, I'm still interested in the ocean and the ocean and the ocean!	n
