# Supplementary material
Source: ML conference proceedings conference paper supplement (https://aclanthology.org/2022.eval4nlp-1.9)
Supplement: SupplementaryMaterial [file 0176.xlsx]

## Sheet: Sheet1
person	source	translation	evaluation: is this a good translation?
person 1	こんにちは。随分とお久しぶりですね。	Hello. Long time no see.	y
person 2	こんにちは、お久しぶりです。	Hello, long time no see.	y
person 1	今お仕事は何をされているんでしたっけ？	What are you doing for work now, again?	y
person 2	今はタクシーの運転手をしています。繁華街に住んでるのですが近くでお客さんが拾えるのでありがたいです。	Right now I work as a taxi driver. I live in a downtown area, so it's nice that I can pick up customers close by.	y
person 1	タクシーの運転手さんなんですね。わたしもよくお世話になっていますよ。仕事が順調そうで羨ましい！	Ah, you're a taxi driver. I often use taxis. I'm jealous that your work seems to be going well!	y
person 2	順調なのですが記憶力に自信がなく固定のお客さんが捕まえられないのが悩みです。	It's going well,but I'm not so confident in my memory. I'm troubled by my inability to get regular customers.	y
person 1	あはは。そうなんですね。わたしも高所恐怖症が治らなくて困ってますよ。	Haha. I see. My fear of heights doesn't go away and it troubles me, too.	y
person 2	高いところ苦手なのですね。わたしには双子の兄弟がいますが兄も高所恐怖症です。	You're not good with heights. I have an elder twin brother, and he is bad with heights too.	n
person 1	あなたは双子なんですね！兄弟がいるっていいなあ。	You're a twin!? I wish I had a sibling.	y
person 2	子供の頃は兄弟いらないと思っていましたが大人になるとありがたい存在ですね。	When I was a child, I thought I didn't need one. However, I'm grateful to have one as an adult.	n
