# Supplementary material
Source: ML conference proceedings conference paper supplement (https://aclanthology.org/2022.eval4nlp-1.9)
Supplement: SupplementaryMaterial [file 0176.xlsx]

## Sheet: Sheet1
person	source	translation	evaluation: is this a good translation?
person 1	こんにちは。随分とお久しぶりですね。	Hello. It's been a long time.	y
person 2	こんにちは、お久しぶりです。	Hello. It's been a while.	y
person 1	今お仕事は何をされているんでしたっけ？	What did you do for a living now?	n
person 2	今はタクシーの運転手をしています。繁華街に住んでるのですが近くでお客さんが拾えるのでありがたいです。	I live in a taxi car near Johannesburg, but I'm glad you got a visitor.	n
person 1	タクシーの運転手さんなんですね。わたしもよくお世話になっていますよ。仕事が順調そうで羨ましい！	You're a taxi driver, and I'm very lucky to be working too hard.	n
person 2	順調なのですが記憶力に自信がなく固定のお客さんが捕まえられないのが悩みです。	I can't help but find a client who can't help me.	n
person 1	あはは。そうなんですね。わたしも高所恐怖症が治らなくて困ってますよ。	Well, that's right. We don't have the guts to cure.	n
person 2	高いところ苦手なのですね。わたしには双子の兄弟がいますが兄も高所恐怖症です。	You don't like me very much, but my brother has twins.	n
person 1	あなたは双子なんですね！兄弟がいるっていいなあ。	You said you had a brother!	n
person 2	子供の頃は兄弟いらないと思っていましたが大人になるとありがたい存在ですね。	I thought you'd grow up when you were a kid, but I'm glad you're not.	n
