# Supplementary material
Source: ML conference proceedings conference paper supplement (https://aclanthology.org/2022.eval4nlp-1.9)
Supplement: SupplementaryMaterial [file 0177.xlsx]

## Sheet: Sheet1
person	source	translation	evaluation: is this a good translation?
person 1	こんにちは。はあ、電車通勤は疲れます。嫌になっちゃう。	Hi, I'm tired of train service.	n
person 2	こんにちは。電車通勤って大変ですよね、わたしは運転自体がお仕事なんです。	Hello, I work at the train station, but I work at the hospital.	n
person 1	へえ、そうなんですね！運転が仕事と言うとタクシーとかですか？	Oh, yeah, that's right. Is that a taxi job?	n
person 2	惜しい！バスの運転手です。時間をいつも気にしながら行動するのがクセになってしまいました。	It's a big bus driver. It's always been time for a change of time.	n
person 1	バスの運転手さんでしたか！わたしは数字とか金額を気にするのがクセになってます。仕事が経理なもので。	I wonder if I was the driver of the bus driver, or if I had a lot of money for a job or a job.	n
person 2	それではあなたも几帳面なほうなんでしょうね。料理でも分量をきちんと測りそうですね。	Well, you must be very careful with food and food.	n
person 1	ははは！よくわかりますね！最近キャンプを始めたんですが、そこでも分量に拘ってしまって。女々しい！と妻に怒られました。	I know you've started camping, but my wife and I have recently started to get mad at her!	n
person 2	そうなんですか。あなたの奥さんは怖いほうですか？わたし、女性がちょっと苦手でなかなか結婚もできません。	Is your wife afraid to marry me a little bit?	n
person 1	わたしは虫が怖くて苦手なんですが、うちの妻は虫より恐ろしいです。	I'm afraid of bugs more than my wife.	n
person 2	えー！そんなことを聞くと余計に女性が怖くなってしまうんですが。	Well, I'm afraid of women who listen to that.	n
