# Supplementary material
Source: ML conference proceedings conference paper supplement (https://aclanthology.org/2022.eval4nlp-1.9)
Supplement: SupplementaryMaterial [file 0177.xlsx]

## Sheet: Sheet1
person	source	translation	evaluation: is this a good translation?
person 1	こんにちは。はあ、電車通勤は疲れます。嫌になっちゃう。	Hello. Phew, commuting by train is tiring. I get sick of it.	y
person 2	こんにちは。電車通勤って大変ですよね、わたしは運転自体がお仕事なんです。	Hello. commuting by train is tough, isn't it? Driving is my job.	y
person 1	へえ、そうなんですね！運転が仕事と言うとタクシーとかですか？	Oh, I see! If driving is your job, you must be a taxi driver.	y
person 2	惜しい！バスの運転手です。時間をいつも気にしながら行動するのがクセになってしまいました。	Close! I'm a bus driver. Always worrying about the time no matter what I do became a habit of mine.	y
person 1	バスの運転手さんでしたか！わたしは数字とか金額を気にするのがクセになってます。仕事が経理なもので。	Oh, you're a bus driver! My habit is always worrying about numbers and prices, since I work in finance.	y
person 2	それではあなたも几帳面なほうなんでしょうね。料理でも分量をきちんと測りそうですね。	You must be quite methodical then. I bet you measure things precisely when cooking.	y
person 1	ははは！よくわかりますね！最近キャンプを始めたんですが、そこでも分量に拘ってしまって。女々しい！と妻に怒られました。	Hahah! How did you know? I recently started going camping, but even when camping I measure things! My wife gets angry and tells me it's unmanly.	y
person 2	そうなんですか。あなたの奥さんは怖いほうですか？わたし、女性がちょっと苦手でなかなか結婚もできません。	Is that so? Is your wife on the scary side? I'm bad with women and so can't really get married.	y
person 1	わたしは虫が怖くて苦手なんですが、うちの妻は虫より恐ろしいです。	I don't like insects and find them scary, but my wife is scarier than insects.	y
person 2	えー！そんなことを聞くと余計に女性が怖くなってしまうんですが。	What! Hearing that makes me even more afraid of women.	y
