# Supplementary material
Source: ML conference proceedings conference paper supplement (https://aclanthology.org/2022.eval4nlp-1.9)
Supplement: SupplementaryMaterial [file 0178.xlsx]

## Sheet: Sheet1
person	source	translation	evaluation: is this a good translation?
person 1	こんばんは。お久しぶりですね。今わたしタクシー運転手をしているんですよ。	Good evening. I'm driving a cab now.	n
person 2	こんばんは！大変そうなお仕事ですね。わたしはパティシエをやってるので、疲れたときは甘いものを買いに来てくださいよ。	Good evening. I'm getting tired of buying the sweet stuff when I get back.	n
person 1	いいですね。甘いもの。わたしには双子の兄弟がいるのですが、彼も好きなので二人分買いに行きますね。	Look, I have a twin brother, so he can buy me two minutes.	n
person 2	ぜひぜひ！いや、双子だったら、兄弟のほうが来たら、あなたかどうか、見分けがつかなそうだな！	No, if you come to see my brother, you'll be my brother!	n
person 1	はは。それもそうかもしれません。お家はお近くでしたっけ？	Was it close to home too?	n
person 2	ええ、そうですよ。でもねえ、ちょっと方角が良くないって占いに出ていたんで、引っ越そうか検討してるところです。	Yeah, but I'm thinking of moving a little bit better, so I'm thinking about it.	n
person 1	そうなんですか？わたしは繁華街に住んでいるんですが、便利でいいですよ。どうですか？	Well, I live in Johannesburg, okay?	n
person 2	いいですね、繁華街。今度、占い師さんに相談してみようかな。でも、わたしの場合、ちょっとでも変なことを言われたら、すぐネガティブに考えちゃうからなぁ。	All right, let's talk about this later, Mr. Nevhen, but if you want to talk to me, I'll tell you what's going on.	n
person 1	そうなんですね。わたしは記憶力に自信がないから、占い師さんに言われたこともすぐに忘れちゃうかも。ダメですよね、ほんとは。	Well, I'm not sure I can remember what I was told, but I'm sure you'll remember soon enough.	n
person 2	いやいや、嫌なことはすぐに忘れて、良いことだけ覚えておけば良いんですよ！	No, no, no, no, no, no, forget it right now!	n
