# Supplementary material
Source: ML conference proceedings conference paper supplement (https://aclanthology.org/2022.eval4nlp-1.9)
Supplement: SupplementaryMaterial [file 0178.xlsx]

## Sheet: Sheet1
person	source	translation	evaluation: is this a good translation?
person 1	こんばんは。お久しぶりですね。今わたしタクシー運転手をしているんですよ。	Good evening. Long time no see. I'm currently working as a taxi driver.	y
person 2	こんばんは！大変そうなお仕事ですね。わたしはパティシエをやってるので、疲れたときは甘いものを買いに来てくださいよ。	Good evening! That sounds like tough work. I work as a baker, so when you're feeling tired, please come and buy something sweet.	n
person 1	いいですね。甘いもの。わたしには双子の兄弟がいるのですが、彼も好きなので二人分買いに行きますね。	Nice idea. Sweet things. I have an older twin brother who also likes sweets, so I'll go and buy enough for two.	y
person 2	ぜひぜひ！いや、双子だったら、兄弟のほうが来たら、あなたかどうか、見分けがつかなそうだな！	Please do! If you're twins, I wouldn't know if you or your brother had come!	y
person 1	はは。それもそうかもしれません。お家はお近くでしたっけ？	Haha. You might be right. Do you live around here?	y
person 2	ええ、そうですよ。でもねえ、ちょっと方角が良くないって占いに出ていたんで、引っ越そうか検討してるところです。	Yes, that's right. However, my fortune told me the direction's not very good, so I'm thinking of moving.	y
person 1	そうなんですか？わたしは繁華街に住んでいるんですが、便利でいいですよ。どうですか？	Is that so? I live downtown, and it's nice and convenient. What do you think?	n
person 2	いいですね、繁華街。今度、占い師さんに相談してみようかな。でも、わたしの場合、ちょっとでも変なことを言われたら、すぐネガティブに考えちゃうからなぁ。	Downtown is nice. I'll discuss it with my fortune teller next time. But if I get told something even a little strange, I always take it negatively.	y
person 1	そうなんですね。わたしは記憶力に自信がないから、占い師さんに言われたこともすぐに忘れちゃうかも。ダメですよね、ほんとは。	I see. I'm not confident in my memory, so I might just forget right away anything a fortune teller told me. It's really no good.	y
person 2	いやいや、嫌なことはすぐに忘れて、良いことだけ覚えておけば良いんですよ！	No, no! You can forget bad things quickly, and just remember the good things!	y
