# Supplementary material
Source: ML conference proceedings conference paper supplement (https://aclanthology.org/2022.eval4nlp-1.9)
Supplement: SupplementaryMaterial [file 0179.xlsx]

## Sheet: Sheet1
person	source	translation	evaluation: is this a good translation?
person 1	今晩は、一段と冷えますなぁ	It's colder tonight than usual.	y
person 2	ですねー！こういう日は、うちのお店の激辛マーボーを食べると、身体がポカポカしますよ！	Right! On days like this, if you eat our restaurant's super spicy mapo, your body will feel nice and warm!	n
person 1	そりゃ激熱だね。でも辛すぎてゴルゴも食べれないんじゃないの？	That's fire! But it's so hot not even Golgo could eat it, right?	y
person 2	それが旨いんじゃないですか！うちの料理長の作る麻婆豆腐は絶品で、わたし、惚れ抜いてるんです！	That's what makes it so good! The mapo tofu our master chef makes is exquisite. I'm totally in love with it!	n
person 1	そっかぁ。わたしは女性の次に辛いのが苦手なんですぅ	I see. The only thing I'm worse with than spicy food is women.	n
person 2	えー、女性が苦手なんですか？なんかトラウマがあるとか？	What! You're bad with women? Did you have a traumatic experience or something?	y
person 1	いや。単純に男衆三兄弟で育ったからかもしれないなぁ。兄ちゃんは女子大好きなんだけどね。どうしらいいと思う？	No. It may just be because I grew up in a family of three brothers. My older brother loves women, though. What do you think I should do?	y
person 2	そうだなあ、女子を落とすには、激辛よりも甘いものが良いかな？いや、わたしが作るチャーハンで胃袋をつかむ作戦は？	Hmm, to get a girl, maybe something sweet is better than something super spicy? The best way to a woman's heart is through her stomach, so how about using some of my fried rice!	n
person 1	チャーハンかぁ。それって甘いの？	Fried rice? Is that sweet?	y
person 2	甘くないけど、心に染み入る味ですよ！見習いシェフですが、チャーハンだけは料理長に認められてるんです！	It's not sweet, but it's got a flavor that gets to your heart! I'm still a chef in training, but the head chef acknowledges at least my fried rice!	y
