# Supplementary material
Source: ML conference proceedings conference paper supplement (https://aclanthology.org/2022.eval4nlp-1.9)
Supplement: SupplementaryMaterial [file 0179.xlsx]

## Sheet: Sheet1
person	source	translation	evaluation: is this a good translation?
person 1	今晩は、一段と冷えますなぁ	Good evening, sir. It's cold tonight.	n
person 2	ですねー！こういう日は、うちのお店の激辛マーボーを食べると、身体がポカポカしますよ！	Hey, you know, this day, when my body eats my mashed, it's a puff!	n
person 1	そりゃ激熱だね。でも辛すぎてゴルゴも食べれないんじゃないの？	Isn't it too hot for you to eat too much goblin?	n
person 2	それが旨いんじゃないですか！うちの料理長の作る麻婆豆腐は絶品で、わたし、惚れ抜いてるんです！	That's good, my sweet, because my cooking is slippery and sweet!	n
person 1	そっかぁ。わたしは女性の次に辛いのが苦手なんですぅ	Well, I'm not very good at the next woman's pain.	n
person 2	えー、女性が苦手なんですか？なんかトラウマがあるとか？	Oh, you don't like women?	n
person 1	いや。単純に男衆三兄弟で育ったからかもしれないなぁ。兄ちゃんは女子大好きなんだけどね。どうしらいいと思う？	No, you might have grown up with three simple brothers, but what do you think of the big girls?	n
person 2	そうだなあ、女子を落とすには、激辛よりも甘いものが良いかな？いや、わたしが作るチャーハンで胃袋をつかむ作戦は？	I mean, do you think I'm gonna get better than having a little stomach problems with girls, or do you think?	n
person 1	チャーハンかぁ。それって甘いの？	What's that, sweet Han?	n
person 2	甘くないけど、心に染み入る味ですよ！見習いシェフですが、チャーハンだけは料理長に認められてるんです！	It's not too much, but it's just a taste of cheering Chef, and the cook is admitted to the chief!	n
