# Supplementary material
Source: ML conference proceedings conference paper supplement (https://aclanthology.org/2022.eval4nlp-1.9)
Supplement: SupplementaryMaterial [file 0180.xlsx]

## Sheet: Sheet1
person	source	translation	evaluation: is this a good translation?
person 1	こんにちは。わたしって、結構匂いフェチだと思うんですよねー。	Hello. I think I've got a pretty strong smell fetish.	y
person 2	マジっすか？どこのにおいがお好みで？	For real? Where do you like to smell?	y
person 1	どこの、じゃなくて何の、と言ってください！お線香やマッチの匂いって懐かしくなりません？	Please say what, not where! Don't you think the smell of matches or incense are nostalgic?	y
person 2	確かに。さてはおばあちゃん子では？	That's true. Do you happen to be a grandmother's child?	y
person 1	それ！そうかもしれませんね。おばあちゃんが毎日、日めくりをめくった時に、大安だの仏滅だの言うの聞いて育ったせいで、占いを信じるようになりましたから。	Yes! You may be right. I grew up listening to my grandmother talk about lucky days and unlucky days as she would turn a page-a-day calendar. Because of that, I started to believe in fortunes.	y
person 2	実はわたくしシングルファーザーなので、実家の母親と同居してて。うちの子供もそうなるかもなぁ。それはそれでいいけど	Actually, I'm a single father, so I live at home with my mother. My children may end up the same. I'm fine with that, though.	y
person 1	良いと思います！ただねえ、フェチと言い切れない理由が１つあるんです！	I think it's good! But there's one reason why I can't totally say it's a fetish!	y
person 2	ほう。と言うと？	Oh? Which means?	y
person 1	日本で一番くさいといわれる、クサヤの匂いをまだ経験してないんですよねー。	I still haven't experienced the smell of dried horse mackerel, said to be the stinkiest thing in Japan.	y
person 2	あー。それはいったん経験しておくべきだね。あれはなかなかの強者だよ。でも食べると美味しいけどね。お酒に合うし	Ahh. You should definitely experience it. It's quite powerful. It tastes good when you eat it, though. It goes well with alcohol, too.	y
person 1	お！お酒好きですか？わたし、パティシエで甘いものも好きなんですが、お酒もいける口なんですよ！	Oh! Do you like to drink? I'm a baker and I like sweet things, but I can also handle alcohol!	n
person 2	そうなの！じゃ今度、くさや飲み会やりましょか！？	Really?! Well then, let's get together and have some dried horse mackerel and drinks!	y
