# Supplementary material
Source: ML conference proceedings conference paper supplement (https://aclanthology.org/2022.eval4nlp-1.9)
Supplement: SupplementaryMaterial [file 0180.xlsx]

## Sheet: Sheet1
person	source	translation	evaluation: is this a good translation?
person 1	こんにちは。わたしって、結構匂いフェチだと思うんですよねー。	Hello, I think it smells good.	n
person 2	マジっすか？どこのにおいがお好みで？	Where do you like it?	n
person 1	どこの、じゃなくて何の、と言ってください！お線香やマッチの匂いって懐かしくなりません？	Tell me where it is, don't you smell like leaves or flaps?	n
person 2	確かに。さてはおばあちゃん子では？	Are you sure you're not a grandmother?	n
person 1	それ！そうかもしれませんね。おばあちゃんが毎日、日めくりをめくった時に、大安だの仏滅だの言うの聞いて育ったせいで、占いを信じるようになりましたから。	I'm sure you're right, Grandma, because when you grow up every day, you're just gonna believe it, like you're gonna believe it, like you're gonna believe it, like you're gonna believe it.	n
person 2	実はわたくしシングルファーザーなので、実家の母親と同居してて。うちの子供もそうなるかもなぁ。それはそれでいいけど	Well, I guess it would be nice to believe that it would be nice for me to be married to my mother in Singapore's family.	n
person 1	良いと思います！ただねえ、フェチと言い切れない理由が１つあるんです！	But I don't think that's a good idea!	n
person 2	ほう。と言うと？	What do you mean?	y
person 1	日本で一番くさいといわれる、クサヤの匂いをまだ経験してないんですよねー。	You don't even know what it smells like in Japan, do you?	n
person 2	あー。それはいったん経験しておくべきだね。あれはなかなかの強者だよ。でも食べると美味しいけどね。お酒に合うし	Well, you should try it once, but it's a very good drink to eat.	n
person 1	お！お酒好きですか？わたし、パティシエで甘いものも好きなんですが、お酒もいける口なんですよ！	Can I get you a drink, too?	n
person 2	そうなの！じゃ今度、くさや飲み会やりましょか！？	Do you want something to drink now?	n
