# Supplementary material
Source: ML conference proceedings conference paper supplement (https://aclanthology.org/2022.eval4nlp-1.9)
Supplement: SupplementaryMaterial [file 0181.xlsx]

## Sheet: Sheet1
person	source	translation	evaluation: is this a good translation?
person 1	レストランも最近暇でね。	Restaurants are pretty slow these days.	n
person 2	たしかにねー。コロナの影響でしょ？	Yeah. Because of COVID-19, right?	y
person 1	そうそう。見習いシェフなんだけどクビにならないかなぁ	Yeah. I wonder if I'll get fired from my job as an assistant chef.	y
person 2	あー、それは心配ですね。わたしの詰めている交番にもね、最近、生活苦で喧嘩したりして駆け込んでくる人が増えてるんですよ。	Ahh, that's worrisome. Recently, the number of people who come to the police box I work at, due to fights from the stress of daily life, are increasing.	y
person 1	交番かぁ。ご苦労様です。休みの日はどうしているの？	A police box? Thank you for your service. What do you do on days off?	y
person 2	非番の日は、可愛い娘っ子２人の相手をしてますよ。あなた、お子さんは？	When I'm not on shift, I take care of my two cute daughters. Do you have any children?	y
person 1	まだ結婚してないので、子供もいないなぁ。彼女ほしいなぁ	I'm not married yet, so I don't have any kids either. I really want a girlfriend.	y
person 2	早く見つかるといいですね！でも、わたしみたいに偏食が激しいと、奥さんになる人は苦労するんです。あなた、好き嫌いは？	I hope you can find one soon! But, if you're too particular about what you eat, like me, your future wife will have a tough time. Are you picky?	y
person 1	好き嫌いはないっす。でも特に辛い物が好きです。	No, I'm not. But I really like spicy food.	n
person 2	おー、それは女子に好かれそうなポイントですね！あとは、そうだな、腕っぷしは強い方？わたしは柔道の腕で、嫁さんを落としたからなあ。	Ohh, that seems like something girls would like! Also, how about, are you strong? My wife fell for my Judo skills.	y
person 1	腕で落としたとは？締め落とした？ちょっと興味あるな。今度その技、伝授してもらえませんか？	She fell for your Judo? Did you use a choking technique? That's a bit interesting. Is there any way you could teach me that trick?	y
person 2	いやいや、これは絶対秘密です！	No way, It's an absolute secret!	y
