# Supplementary material
Source: ML conference proceedings conference paper supplement (https://aclanthology.org/2022.eval4nlp-1.9)
Supplement: SupplementaryMaterial [file 0181.xlsx]

## Sheet: Sheet1
person	source	translation	evaluation: is this a good translation?
person 1	レストランも最近暇でね。	We haven't had a restaurant in a while.	n
person 2	たしかにねー。コロナの影響でしょ？	I don't think so.	n
person 1	そうそう。見習いシェフなんだけどクビにならないかなぁ	Yeah, I'm a researcher, but I think I should fire you.	n
person 2	あー、それは心配ですね。わたしの詰めている交番にもね、最近、生活苦で喧嘩したりして駆け込んでくる人が増えてるんですよ。	Well, it's been a long day since I've been fighting with someone who's been fighting with me lately.	n
person 1	交番かぁ。ご苦労様です。休みの日はどうしているの？	How's your day going?	n
person 2	非番の日は、可愛い娘っ子２人の相手をしてますよ。あなた、お子さんは？	The third day of the blackout, you two little girls, huh?	n
person 1	まだ結婚してないので、子供もいないなぁ。彼女ほしいなぁ	I haven't married a child yet, so I want her.	n
person 2	早く見つかるといいですね！でも、わたしみたいに偏食が激しいと、奥さんになる人は苦労するんです。あなた、好き嫌いは？	But I hope you find someone who likes to eat as much as I do, like my wife, do you like it?	n
person 1	好き嫌いはないっす。でも特に辛い物が好きです。	I don't like it, but it's hard.	n
person 2	おー、それは女子に好かれそうなポイントですね！あとは、そうだな、腕っぷしは強い方？わたしは柔道の腕で、嫁さんを落としたからなあ。	Well, that's the point, isn't it? That's the point of being a pretty girl, isn't it?	n
person 1	腕で落としたとは？締め落とした？ちょっと興味あるな。今度その技、伝授してもらえませんか？	Hey, are you interested in getting that arm off your head now?	n
person 2	いやいや、これは絶対秘密です！	No, this is not a secret!	n
