# Supplementary material
Source: ML conference proceedings conference paper supplement (https://aclanthology.org/2022.eval4nlp-1.9)
Supplement: SupplementaryMaterial [file 0182.xlsx]

## Sheet: Sheet1
person	source	translation	evaluation: is this a good translation?
person 1	こんにちは。元気ですか？	Hello, how are you?	y
person 2	こんにちは、元気です！	Hello, I'm fine!	y
person 1	わたしはシングルファーザーですのでいろいろ大変ですが、その分生活が充実していますよ。	I'm Scorpion, but it's a lot of work, that's all.	n
person 2	そうなのですね。どのように充実しているのですか？	Yeah, how do you truly do that?	n
person 1	やっぱり子どもの成長を見るのは楽しいですよね。ただ、わたしは子沢山の家庭で育ったので、シングルファーザーではなくて妻もいてくれればにぎやかで楽しかったと思いますけど。	You know, I'm having a lot of fun watching my kids grow up in a family, so I'm not just a wife, and I've grown up in a lot of suits.	n
person 2	子供はやはり宝なのですね。わたしは消防士になれるよう日々励んでいるところです。	The child is probably the treasure I've always been a firefighter.	n
person 1	そうなんですか！大切なお仕事ですからがんばってください。わたしも自動車整備士ですので、消防車には興味があります。	Well, good luck with your job, too, so I'm an automobile investigator, so I'm interested in firehouse fire.	n
person 2	消防車はやはり作り方が違うのですかね？最近疲れることが多いので大好きな温泉に行きたいですね。	Isn't it true that the fire car has always been tired of making lots of ice?	n
person 1	温泉もいいですねー、やっぱり日常から離れないとやっていられませんよ。昔は運動部に所属していましたので、毎日厳しくて本当に疲れました。	I've been tired of the warm waters every day since I've been in the middle of my life.	n
person 2	運動は疲れますよね、わたしは卓球部に入ってました。	I'm really tired of the ball.	n
