# Supplementary material
Source: ML conference proceedings conference paper supplement (https://aclanthology.org/2022.eval4nlp-1.9)
Supplement: SupplementaryMaterial [file 0182.xlsx]

## Sheet: Sheet1
person	source	translation	evaluation: is this a good translation?
person 1	こんにちは。元気ですか？	Hello. How are you?	y
person 2	こんにちは、元気です！	Hello, I'm fine!	y
person 1	わたしはシングルファーザーですのでいろいろ大変ですが、その分生活が充実していますよ。	Since I'm a single father, there are a lot of tough things in life, but it's that much more fulfilling.	y
person 2	そうなのですね。どのように充実しているのですか？	I see. In what ways is it fulfilling?	y
person 1	やっぱり子どもの成長を見るのは楽しいですよね。ただ、わたしは子沢山の家庭で育ったので、シングルファーザーではなくて妻もいてくれればにぎやかで楽しかったと思いますけど。	It's fun to see your children grow, after all. However, I was raised in a house with lots of children, so I think it'd be more lively and fun if I wasn't a single father and had a wife.	y
person 2	子供はやはり宝なのですね。わたしは消防士になれるよう日々励んでいるところです。	Children are treasures, aren't they? I'm working hard every day to become a fire fighter.	y
person 1	そうなんですか！大切なお仕事ですからがんばってください。わたしも自動車整備士ですので、消防車には興味があります。	Is that so! That's an important job, so please do your best. I'm an automobile mechanic, so I'm interested in fire trucks.	y
person 2	消防車はやはり作り方が違うのですかね？最近疲れることが多いので大好きな温泉に行きたいですね。	Are fire trucks built differently? I'm often tired lately so I'd like to go to a hot spring. I love them.	y
person 1	温泉もいいですねー、やっぱり日常から離れないとやっていられませんよ。昔は運動部に所属していましたので、毎日厳しくて本当に疲れました。	Hot springs are nice. Sometimes you need to get away from daily life. I used to be in an athletics club, so every day was tough and I was really tired.	y
person 2	運動は疲れますよね、わたしは卓球部に入ってました。	Exercise makes you tired, doesn't it? I was in the table tennis club.	y
