# Supplementary material
Source: ML conference proceedings conference paper supplement (https://aclanthology.org/2022.eval4nlp-1.9)
Supplement: SupplementaryMaterial [file 0183.xlsx]

## Sheet: Sheet1
person	source	translation	evaluation: is this a good translation?
person 1	こんばんは、調子いかがですか？	Good evening, are you feeling okay?	y
person 2	はい、辛いことがあったんですけど、なんとか明るく生きていこうと思っているんです。	Yes, I had a bitter experience, but I'm thinking of keeping on living positively.	y
person 1	そうなのですね。大丈夫ですか？	I see. Are you okay?	y
person 2	はい、実は夫と死別したんです。子どもも1人いるのでこれからの生活どうなるのかと不安です。	Yes. Actually, my husband passed away. I have a child, so I'm worried about our life moving forward.	y
person 1	それは辛いですね。お子さんを支えないとなのでよりきついですね。	That's rough. It's even rougher because you have to support your child.	y
person 2	そうなんです、まだ30代なのでわたしが働いて家族を支えないといけません。明るく振る舞おうって思ってはいるんですが難しいですよね。	Exactly, I'm still in my 30s so I need to work to support my family. I want to try and act positive but it's difficult.	y
person 1	今は無理せず子供と一緒に悲しんでもいいと思います。些細なことで笑える日が必ずきますよ！	I think it's okay to not push yourself and grieve together with your child. The day where you can laugh about little things will surely come!	y
person 2	ありがとうございます。わたしの取り柄は明るさだってよく言われますので、あまり暗くならずにがんばりたいと思います。	Thank you. I'm often told that one of my strong points is my positivity, so I want to try my best not to be too gloomy.	y
person 1	無理のないように頑張ってください！とてもどうでもいいことなのですが偏食が激しく困っています。好き嫌いなどありますか？	Please do your best without pushing yourself too hard! It's not important at all, but I'm troubled by my overly particular eating habits. Are you a picky eater?	y
person 2	いえ、好き嫌いはいけないと指導されて育ちましたのでなんでも食べます。バスケットボール部に所属していたんです。	No, I was raised with the idea that being picky is bad and so I eat anything. I used to be in the basketball club.	y
