# Supplementary material
Source: ML conference proceedings conference paper supplement (https://aclanthology.org/2022.eval4nlp-1.9)
Supplement: SupplementaryMaterial [file 0183.xlsx]

## Sheet: Sheet1
person	source	translation	evaluation: is this a good translation?
person 1	こんばんは、調子いかがですか？	Good evening. How are you?	y
person 2	はい、辛いことがあったんですけど、なんとか明るく生きていこうと思っているんです。	Yes, there was a difficult time, but I'm trying to live a little light.	y
person 1	そうなのですね。大丈夫ですか？	You're sure you're okay?	y
person 2	はい、実は夫と死別したんです。子どもも1人いるのでこれからの生活どうなるのかと不安です。	Yes, actually, there are other people who died with my husband, and I'm afraid of what's gonna happen to my children.	n
person 1	それは辛いですね。お子さんを支えないとなのでよりきついですね。	It's hard for you to be more patient with children.	n
person 2	そうなんです、まだ30代なのでわたしが働いて家族を支えないといけません。明るく振る舞おうって思ってはいるんですが難しいですよね。	Yes, I'm still 300 years old, and I'm still trying to get my family together, but it's hard to move on.	n
person 1	今は無理せず子供と一緒に悲しんでもいいと思います。些細なことで笑える日が必ずきますよ！	I don't think it's a very funny day to be sad with a little boy without a child!	n
person 2	ありがとうございます。わたしの取り柄は明るさだってよく言われますので、あまり暗くならずにがんばりたいと思います。	Thank you very much, because if you want to do so well, don't worry about it so much.	n
person 1	無理のないように頑張ってください！とてもどうでもいいことなのですが偏食が激しく困っています。好き嫌いなどありますか？	Do you really like eating so much that you can't?	n
person 2	いえ、好き嫌いはいけないと指導されて育ちましたのでなんでも食べます。バスケットボール部に所属していたんです。	No, I don't like the way I grew up, but I've been raised by a group of people who don't like it.	n
