# Supplementary material
Source: ML conference proceedings conference paper supplement (https://aclanthology.org/2022.eval4nlp-1.9)
Supplement: SupplementaryMaterial [file 0184.xlsx]

## Sheet: Sheet1
person	source	translation	evaluation: is this a good translation?
person 1	こんにちは、最近は調子はどうでしょうか。	Hello, how are you these days?	y
person 2	こんにちは、元気にやっていますよ。	Hello, I'm doing fine.	y
person 1	そうなんですね。わたしは消防士になりたいと思っていますが、お仕事は何をなさっていますか？	I see. I want to become a fire fighter, but what do you do for work?	y
person 2	わたしは海上保安官です。似たお仕事ですね。	I'm a maritime safety official. The two jobs are similar.	y
person 1	海上保安官の方とお話しできるなんて嬉しいです！2000年生まれなので、年上の先輩のお話しをたくさん伺いたいです。	I'm happy that I can talk with a maritime safety official! I was born in 2000, so I'd love to hear some stories from someone my senior.	y
person 2	色々な話をしましょう。ご出身はどちらですか？わたしは宮城県で生まれました。	Let's talk about all sorts of things. Where are you from? I was born in Miyagi Prefecture.	y
person 1	群馬県です。そのせいか、温泉が好きで今でもたまに行くんですよ。	Gunma Prefecture. Maybe because of that, I like hot springs and I still go sometimes.	y
person 2	そうなのですね！わたしは海の近くにずっといるせいかサーフィンが好きです。	Oh, really? Maybe I like surfing since I've always been close to the beach.	y
person 1	海はあまり見たことがないのでとても羨ましいです！泳ぐことに縁がなくて、卓球部に所属していました。	I haven't really seen the ocean many times so I'm super jealous! Swimming wasn't my thing, I was in the table tennis club.	y
person 2	卓球だったのですね。今もされるのですか？	Oh, table tennis. Do you still play?	y
person 1	いえ、今はもうやめてしまいました。ご趣味は何かありますか？	No, I already quit. Do you have any hobbies?	y
person 2	趣味はサーフィンですね！得意です！	My hobby is surfing! I'm good at it!	y
