# Supplementary material
Source: ML conference proceedings conference paper supplement (https://aclanthology.org/2022.eval4nlp-1.9)
Supplement: SupplementaryMaterial [file 0184.xlsx]

## Sheet: Sheet1
person	source	translation	evaluation: is this a good translation?
person 1	こんにちは、最近は調子はどうでしょうか。	Hello, how are you doing lately?	y
person 2	こんにちは、元気にやっていますよ。	Hi, I'm doing great.	y
person 1	そうなんですね。わたしは消防士になりたいと思っていますが、お仕事は何をなさっていますか？	Yes, I want to be a firefighter, but what do you do?	y
person 2	わたしは海上保安官です。似たお仕事ですね。	I look like the Coast Guard.	n
person 1	海上保安官の方とお話しできるなんて嬉しいです！2000年生まれなので、年上の先輩のお話しをたくさん伺いたいです。	I'm glad you could speak with the Coast Guard, because I'd like to talk to over 200 years old!	n
person 2	色々な話をしましょう。ご出身はどちらですか？わたしは宮城県で生まれました。	Which castle have I been born in?	n
person 1	群馬県です。そのせいか、温泉が好きで今でもたまに行くんですよ。	I'm still in love with a hot sea or something.	n
person 2	そうなのですね！わたしは海の近くにずっといるせいかサーフィンが好きです。	Oh, yeah, I always like surfing near the sea.	n
person 1	海はあまり見たことがないのでとても羨ましいです！泳ぐことに縁がなくて、卓球部に所属していました。	Because I've never seen a sea so lucky that I've never been able to swim so much, and I'm very lucky that I've never been able to swim so hard, and I've been in the spotlight!	n
person 2	卓球だったのですね。今もされるのですか？	And now I'm in the mood?	n
person 1	いえ、今はもうやめてしまいました。ご趣味は何かありますか？	No, no, no, no, no, no. Do you have anything to eat?	n
person 2	趣味はサーフィンですね！得意です！		n
