# Supplementary material
Source: ML conference proceedings conference paper supplement (https://aclanthology.org/2022.eval4nlp-1.9)
Supplement: SupplementaryMaterial [file 0185.xlsx]

## Sheet: Sheet1
person	source	translation	evaluation: is this a good translation?
person 1	こんばんは、調子はいかがですか？	Good evening, how are you feeling?	y
person 2	まあまあですね。こんな暮らしから抜け出して大金持ちになりたいですよ。	So-so. I want to get away from this life and get super rich.	y
person 1	金持ちには誰もがなりたいですね。わたしは３０代で子供が１人いますがもう少しお金欲しいです。	Yeah, everyone wants to be rich. I'm in my 30s and have a child but I would like a bit more money.	y
person 2	そうなんですか。わたしも一応は一家の大黒柱ですが、警備員として働いておりますので家計はなかなか楽になりません。	Is that so? I'm also the breadwinner of my family, but I'm working as a security guard and so things aren't easy with the household budget.	y
person 1	なかなか難しいですね。わたしも夫とは死別してるので親一人、収入は少ないです。	It's quite difficult. I'm bereaved of my husband and a single parent, so my income is low.	y
person 2	お互いに大変ですよね。昔は剣道部に入っていて活躍したのに、どうしてこうなったんだろうって思います。	Things are tough for the both of us. Long ago, I was in the Kendo club and was quite talented. I wonder why things ended up this way.	y
person 1	わかります。明るさが取り柄なのでなんとか乗り越えてきましたがしんどいですね。	I understand. Being cheerful is my strong point, so I've somehow gotten over everything to this point but it's tough.	y
person 2	はい。でもペットを見ると、少しだけ気持ちが楽になります。カメを飼っているんです。	Yeah. But when I see my pet, I feel a little better. I have a turtle.	y
person 1	カメ可愛いですね。もう長いのですか？	Turtles are cute. Have you had it a while?	y
person 2	はい、といっても3年くらいですけど。あなたは何かペットを飼っていますか？	Yes, but just about three years. Do you have any pets?	y
