# Supplementary material
Source: ML conference proceedings conference paper supplement (https://aclanthology.org/2022.eval4nlp-1.9)
Supplement: SupplementaryMaterial [file 0185.xlsx]

## Sheet: Sheet1
person	source	translation	evaluation: is this a good translation?
person 1	こんばんは、調子はいかがですか？	Good evening. How are you?	y
person 2	まあまあですね。こんな暮らしから抜け出して大金持ちになりたいですよ。	It's okay. I want to get out of here and become rich.	y
person 1	金持ちには誰もがなりたいですね。わたしは３０代で子供が１人いますがもう少しお金欲しいです。	Rich people want to be rich, but I just want to have a little more money for 30 kids.	n
person 2	そうなんですか。わたしも一応は一家の大黒柱ですが、警備員として働いておりますので家計はなかなか楽になりません。	Well, my family's a big security guard, so I'm not at liberty to work as a caterpillar.	n
person 1	なかなか難しいですね。わたしも夫とは死別してるので親一人、収入は少ないです。	It's hard for me and my husband to die too, so I don't have enough money to pay for it.	n
person 2	お互いに大変ですよね。昔は剣道部に入っていて活躍したのに、どうしてこうなったんだろうって思います。	It's a tough time for both of us, so why did this happen?	n
person 1	わかります。明るさが取り柄なのでなんとか乗り越えてきましたがしんどいですね。	I don't know. It's just that we've gotten through a lot.	n
person 2	はい。でもペットを見ると、少しだけ気持ちが楽になります。カメを飼っているんです。	Yes, but when I look at the pet, I feel a little better with a turtle.	y
person 1	カメ可愛いですね。もう長いのですか？	Isn't it long now?	n
person 2	はい、といっても3年くらいですけど。あなたは何かペットを飼っていますか？	Yes, but you have a pet for three years?	n
