# Supplementary material
Source: ML conference proceedings conference paper supplement (https://aclanthology.org/2022.eval4nlp-1.9)
Supplement: SupplementaryMaterial [file 0186.xlsx]

## Sheet: Sheet1
person	source	translation	evaluation: is this a good translation?
person 1	こんにちは。わたしはサーフィンが得意なんですが、あなたは何か得意なものありますか？	Good afternoon. I'm good at surfing. Is there anything you're good at?	y
person 2	ありますよ。お経を読むことです。わたし、実は僧侶なんですよ。	There is. Reading sutras. Actually, I'm a monk.	y
person 1	わぁ、そうだったんですね。知りませんでした。わたしはこう見えて、海上保安官なんです。	Wow, really? I didn't know that. Although I may not look it, I'm actually a maritime security officer.	y
person 2	海上保安官ですか！すごいですね。じゃぁ日本の海上を守っていいらっしゃる方なんですね。尊敬します。	A maritime security officer!? That's awesome. So you're someone who protects Japan's oceans. I respect you.	y
person 1	いやいやとんでもない。ただの海好きです。あなたはご出身はどちらですか？	It's not such a big deal. I just like the ocean. Where are you from?	y
person 2	出身はこの辺りで、地元なんです。まだ20代前半で修業中の身、両親と暮らしているんですが、この辺りは暮らしやすいですよ。	I'm a local, I was born around here. I'm in my early 20s and still studying, so I live with my parents. This area is nice to live in.	y
person 1	そうなんですね。確かにいいところです。わたしは宮城県で生まれて、最近この辺に引っ越してきました。海が魅力で。	That's right. It is a nice place. I was born in Miyagi Prefecture, and I recently moved to this area because the sea is appealing.	y
person 2	海は確かに魅力的ですよね。わたし、高校時代は野球部に入っていたんですが、よく砂浜をマラソンしましたよ。	Yeah, the sea really is appealing. When I was in high school, I was in the baseball club, and we often ran marathons on the beach.	y
person 1	体力がありそうですね。好きな食べ物ってありますか？	Sounds like you've got stamina. Are there any foods you like?	y
person 2	好きな食べ物はないですね。でも、食べられるのなら、何でも食べたいです。坊主なので制限がありまして。	There aren't any foods I like in particular. However, If I could, I would eat anything. As a monk, there are restrictions.	y
