# Supplementary material
Source: ML conference proceedings conference paper supplement (https://aclanthology.org/2022.eval4nlp-1.9)
Supplement: SupplementaryMaterial [file 0186.xlsx]

## Sheet: Sheet1
person	source	translation	evaluation: is this a good translation?
person 1	こんにちは。わたしはサーフィンが得意なんですが、あなたは何か得意なものありますか？	Hello, I'm very good at surfing, but are you good at something?	y
person 2	ありますよ。お経を読むことです。わたし、実は僧侶なんですよ。	Yes, I'm a monk.	n
person 1	わぁ、そうだったんですね。知りませんでした。わたしはこう見えて、海上保安官なんです。	Well, I didn't see that. I'm a Coast Guard officer.	n
person 2	海上保安官ですか！すごいですね。じゃぁ日本の海上を守っていいらっしゃる方なんですね。尊敬します。	Coast Guard, then!	n
person 1	いやいやとんでもない。ただの海好きです。あなたはご出身はどちらですか？	No, no, I just like the ocean. Where are you from?	y
person 2	出身はこの辺りで、地元なんです。まだ20代前半で修業中の身、両親と暮らしているんですが、この辺りは暮らしやすいですよ。	I'm a local girl from around here, but I still live with my parents for 20 months, and I'm still very easy to live with.	n
person 1	そうなんですね。確かにいいところです。わたしは宮城県で生まれて、最近この辺に引っ越してきました。海が魅力で。	Yes, I've been in the court for a long time now, and I've been raised by the court.	n
person 2	海は確かに魅力的ですよね。わたし、高校時代は野球部に入っていたんですが、よく砂浜をマラソンしましたよ。	I was very attractive in the ocean in Malasun, and I've been in high school for years.	n
person 1	体力がありそうですね。好きな食べ物ってありますか？	Do you like food?	n
person 2	好きな食べ物はないですね。でも、食べられるのなら、何でも食べたいです。坊主なので制限がありまして。	I don't like food, but if you can eat anything, you can have anything to eat.	n
