# Supplementary material
Source: ML conference proceedings conference paper supplement (https://aclanthology.org/2022.eval4nlp-1.9)
Supplement: SupplementaryMaterial [file 0187.xlsx]

## Sheet: Sheet1
person	source	translation	evaluation: is this a good translation?
person 1	こんにちは。わたしは警備員の仕事をしているのですが、あなたはどんな方ですか？	Hello, I'm working for the security guard. How are you?	y
person 2	こんにちは。わたしはハヤシライス専門店で働いているんですよ。	Hello. I work at the Hiroshima Research.	n
person 1	専門店のハヤシライスって、美味しそうですね！	It's delicious!	n
person 2	もちろん！でも専門店だけあって、メニューはハヤシライスただ一品！お陰で安月給なのが悩みなんですよ、とほほ。	Of course, but the menu is just a matter of time before I get paid.	n
person 1	そうなんですか。安月給は、わたしも同じです。一家の大黒柱として頑張っていますが、お金持ちになる夢には程遠い収入でして。	Yeah, me too, but I've been working as much money as my family's big black pillars, and I've always wanted to be rich.	n
person 2	わたしもです。外国暮らしに憧れて貯金を頑張っているのですが、一体いつになることやらって感じです。	I've always wanted to spend my whole life saving money, and I've always wanted to live in country.	n
person 1	お互い、大変ですね。ところで、動物はお好きですか？わたし、カメを飼ってるんです。	Well, by the way, do you like me, turtle?	n
person 2	ええ！カメを！それは珍しいですね。動物は好きですが、カメはまだ触ったことすらありません。	Yeah, it's rare, but the tortoise doesn't even touch me yet.	n
person 1	そうなんですか？意外と人になつきますし、わたしの後を追いかけてきたりして、可愛いんですよ。	Is it? After all, they follow me.	n
person 2	ええ～！懐くなんて意外です！最近わたしに冷たい二人暮らし中のパートナーより、カメとの方が幸せに暮らせそうです！	I can't believe I've been more happy living with a tortoise than I've been living with my partner recently!	n
person 1	あはは、そうかもしれませんねぇ。今度、ペットを飼うときはカメも候補に入れてあげてくださいね。	Well, maybe next time you have a pet, give it to the candidate.	n
person 2	そうですね！その時はまたご相談させてくださいね！	Then let me talk to him again!	n
