# Supplementary material
Source: ML conference proceedings conference paper supplement (https://aclanthology.org/2022.eval4nlp-1.9)
Supplement: SupplementaryMaterial [file 0187.xlsx]

## Sheet: Sheet1
person	source	translation	evaluation: is this a good translation?
person 1	こんにちは。わたしは警備員の仕事をしているのですが、あなたはどんな方ですか？	Good afternoon. I work as a security guard. What kind of work do you do?	y
person 2	こんにちは。わたしはハヤシライス専門店で働いているんですよ。	Good afternoon. I work at a restaurant that specializes in hashed beef and rice.	y
person 1	専門店のハヤシライスって、美味しそうですね！	Hashed beef and rice from a specialty restaurant sounds good!	y
person 2	もちろん！でも専門店だけあって、メニューはハヤシライスただ一品！お陰で安月給なのが悩みなんですよ、とほほ。	Of course! But since it's a specialty shop, the only thing on the menu is hashed beef and rice! Thanks to that, low monthly salaries are a concern. Boo-hoo.	y
person 1	そうなんですか。安月給は、わたしも同じです。一家の大黒柱として頑張っていますが、お金持ちになる夢には程遠い収入でして。	Oh, I see. As for low monthly salaries, I'm in the same boat. I'm doing my best to support my family, but my salary puts me far away from my dream of being rich.	y
person 2	わたしもです。外国暮らしに憧れて貯金を頑張っているのですが、一体いつになることやらって感じです。	Me too. I long to live overseas and I'm doing my best to save money, but it's like "when will it ever happen?"	y
person 1	お互い、大変ですね。ところで、動物はお好きですか？わたし、カメを飼ってるんです。	We've both got it tough. By the way, do you like animals? I have a pet turtle.	y
person 2	ええ！カメを！それは珍しいですね。動物は好きですが、カメはまだ触ったことすらありません。	Wow! A turtle? That's rare. I like animals, but I've never even touched a turtle.	y
person 1	そうなんですか？意外と人になつきますし、わたしの後を追いかけてきたりして、可愛いんですよ。	Really? They get surprisingly attached to people, and it even does things like follow me around. They're cute.	y
person 2	ええ～！懐くなんて意外です！最近わたしに冷たい二人暮らし中のパートナーより、カメとの方が幸せに暮らせそうです！	Wow!! I'm surprised they get attached! I think I could live more happily with a turtle than my partner I'm currently living with, who's been cold to me recently!	y
person 1	あはは、そうかもしれませんねぇ。今度、ペットを飼うときはカメも候補に入れてあげてくださいね。	Haha, maybe so. Whenever you buy a pet, please put turtles as a candidate as well.	y
person 2	そうですね！その時はまたご相談させてくださいね！	You're right! At that time please let me discuss it with you again!	y
