# Supplementary material
Source: ML conference proceedings conference paper supplement (https://aclanthology.org/2022.eval4nlp-1.9)
Supplement: SupplementaryMaterial [file 0188.xlsx]

## Sheet: Sheet1
person	source	translation	evaluation: is this a good translation?
person 1	どうも、初めまして。ご機嫌いかがですか？	Hello, how are you?	n
person 2	初めまして。気分も体の調子も良いですよ。おかげさまで、家政婦の仕事もばっちりこなせています！	I'm glad to see you're feeling better, too, and my housekeeper's job is taken care of.	n
person 1	家政婦さんでらっしゃいましたか。人の役に立つ素晴らしいお仕事をされていますね。わたしは僧侶として、修行の最中なんです。	Good job with your housekeeper. I'm in the middle of a great job as a monks.	n
person 2	修業中のお坊さまでしたか。あなたのお仕事も、人の役に立つ素晴らしいお仕事ですよね。いつもみんなのために拝んでくださって、ありがとうございます。	Thank you all for your service, son.	n
person 1	まだ20代前半の未熟者ですが、これからも頑張って修行に励みたいと思います。ところであなたは動物なんてお好きですか？	I'm still 20 years old, but do you really like animals?	n
person 2	動物、好きですよ！ペットにウサギを飼ってるんです。姉と二人暮らししながら、可愛がっています。	I love animals, and I love rabbits, and I love them both, and I love them both.	n
person 1	ウサギですか！ふわふわモフモフでかわいいですよねぇ。わたしも鳥を飼っていまして。動物の存在は、心を癒してくれますよね。	rabbits or kittens, but I don't have a cute soul.	n
person 2	本当ですね！そういう生活の中のゆとりって、大切ですものね。ところで、絵を描くのはお好きですか？わたし、ゴッホを尊敬していて、学生時代は美術部にも入っていたんです。	Do you really like that painting, by the way, do you like it when I paint Van Gogh?	n
person 1	学生時代は野球部だったんですが、実は美術部にも入ってみたかったくらい、絵も好きなんです。ぜひ今度、あなたの絵を拝見してみたいですね。	In fact, I'd like to see you in the art club as well as a high school student.	n
person 2	そうだったんですか！それでは、お恥ずかしいですが、今度お持ちしますね。	Well, I'm ashamed to see your face again!	n
