# Supplementary material
Source: ML conference proceedings conference paper supplement (https://aclanthology.org/2022.eval4nlp-1.9)
Supplement: SupplementaryMaterial [file 0188.xlsx]

## Sheet: Sheet1
person	source	translation	evaluation: is this a good translation?
person 1	どうも、初めまして。ご機嫌いかがですか？	Hello, nice to meet you. How are you?	y
person 2	初めまして。気分も体の調子も良いですよ。おかげさまで、家政婦の仕事もばっちりこなせています！	Nice to meet you. I'm fine and in good health, too. Fortunately, I'm managing my job as a maid perfectly, too!	y
person 1	家政婦さんでらっしゃいましたか。人の役に立つ素晴らしいお仕事をされていますね。わたしは僧侶として、修行の最中なんです。	Oh, you're a maid? That's a wonderful and useful job. I'm a monk, and I'm currently in the middle of my training.	y
person 2	修業中のお坊さまでしたか。あなたのお仕事も、人の役に立つ素晴らしいお仕事ですよね。いつもみんなのために拝んでくださって、ありがとうございます。	You're a monk in training? Your job is also wonderful and helpful to people. Thank you for always praying for the sake of everyone.	y
person 1	まだ20代前半の未熟者ですが、これからも頑張って修行に励みたいと思います。ところであなたは動物なんてお好きですか？	I'm still in my early 20s and inexperienced, but I want to do my best with my training. By the way, do you like animals?	y
person 2	動物、好きですよ！ペットにウサギを飼ってるんです。姉と二人暮らししながら、可愛がっています。	I do! I have a pet rabbit. I take good care of it while living together with my sister.	y
person 1	ウサギですか！ふわふわモフモフでかわいいですよねぇ。わたしも鳥を飼っていまして。動物の存在は、心を癒してくれますよね。	Oh, a rabbit! They're so cute and fluffy. I also have a pet bird. Having animals around really heals your heart.	y
person 2	本当ですね！そういう生活の中のゆとりって、大切ですものね。ところで、絵を描くのはお好きですか？わたし、ゴッホを尊敬していて、学生時代は美術部にも入っていたんです。	Right! With your lifestyle, it's important to have that kind of space. By the way, do you like drawing? I admire Van Gogh, and when I was a student I was in the art club.	y
person 1	学生時代は野球部だったんですが、実は美術部にも入ってみたかったくらい、絵も好きなんです。ぜひ今度、あなたの絵を拝見してみたいですね。	I was in the baseball club when I was a student, but I like art so much that I actually wanted to join the art club, too. I'd love to see your drawings some time.	y
person 2	そうだったんですか！それでは、お恥ずかしいですが、今度お持ちしますね。	Is that so? In that case, although it's a bit embarrassing, I'll bring some next time.	y
