# Supplementary material
Source: ML conference proceedings conference paper supplement (https://aclanthology.org/2022.eval4nlp-1.9)
Supplement: SupplementaryMaterial [file 0189.xlsx]

## Sheet: Sheet1
person	source	translation	evaluation: is this a good translation?
person 1	こんにちは！わたし、今パートナーと二人暮らししてるんですけど、あなたはご家族と住んでるんですか？	Hello! Right now I'm living together with my partner, but do you live with any family?	y
person 2	ええ、私は自営業をしているので家族と住んでいますよ。あなたは何の仕事をしているのですか？	Yes, I run my own business and so I live with my family. What kind of work do you do?	y
person 1	わたしはOLです。でも、月給が安くって。あ～あ、これじゃ憧れの外国暮らしなんてできないな～。	I'm an office worker. But, my monthly salary is low. Ahh, at this rate I'll never get my dream life overseas.	y
person 2	そうなんですね、私も探偵ですから月給は安い方だと思います。そんな時は何か新しいことを始めるべきですよ！	Yeah, I'm a detective and I think my salary is on the low end too. When you're feeling that way, it's time to start something new!	y
person 1	探偵さんなんですか！？すごい！わたし、探偵さんと初めて会いました。新しいことかぁ、なんでしょうね、料理を極めてみるとか？	You're a detective? Wow! This is the first time I've met a detective. Something new? I wonder if I should try to work on cooking or something.	y
person 2	いいことです！私は犬を飼っていて一緒に散歩することが好きになりました。	That's good! I have a dog and came to like walking together.	y
person 1	犬って良いですよね～。なついてくれるし、散歩も一緒に歩くと楽しくなっちゃう！	Dogs are nice, aren't they? They become attached, and walking becomes more fun when you're together.	y
person 2	あなたは何か飼わないのですか？	You don't have a pet?	y
person 1	うちのアパート、ペットだめなんですよ。残念！ところで、好きな食べ物って、何かありますか？	My apartment doesn't allow pets. Too bad! Speaking of which, are there any foods that you like?	y
person 2	わたしは何でも好きですよ、特に好き嫌いはしない方ですので。	I like everything, as I'm not a particularly picky person.	y
person 1	そうなんですね。わたし、ハヤシライスが好きなんですが、ハヤシライスでもグリーンピース入りのやつは嫌いなんですよー。あれ、ちょっと苦手で。	I see. I like hashed beef and rice, but I don't like the kind with green peas inside. I'm not fond of that.	y
person 2	少し苦いですよね、良ければ今度おいしいハヤシライスの店を教えましょうか？	It's a little bit bitter, isn't it? If you don't mind, perhaps I could tell you about a good hashed beef and rice restaurant some time?	y
