# Supplementary material
Source: ML conference proceedings conference paper supplement (https://aclanthology.org/2022.eval4nlp-1.9)
Supplement: SupplementaryMaterial [file 0189.xlsx]

## Sheet: Sheet1
person	source	translation	evaluation: is this a good translation?
person 1	こんにちは！わたし、今パートナーと二人暮らししてるんですけど、あなたはご家族と住んでるんですか？	Hi, I'm living with my partner right now, but you live with your family?	y
person 2	ええ、私は自営業をしているので家族と住んでいますよ。あなたは何の仕事をしているのですか？	Yeah, I'm working with my own family because I'm working with my own family?	n
person 1	わたしはOLです。でも、月給が安くって。あ～あ、これじゃ憧れの外国暮らしなんてできないな～。	I'm good, but I can't live like this, because I can't live like this.	n
person 2	そうなんですね、私も探偵ですから月給は安い方だと思います。そんな時は何か新しいことを始めるべきですよ！	Well, I'm a detective too, so I think the moon should start something that's cheap!	n
person 1	探偵さんなんですか！？すごい！わたし、探偵さんと初めて会いました。新しいことかぁ、なんでしょうね、料理を極めてみるとか？	I've never seen a new detective before, have I, detective?	n
person 2	いいことです！私は犬を飼っていて一緒に散歩することが好きになりました。	I've had a good walk with a dog!	n
person 1	犬って良いですよね～。なついてくれるし、散歩も一緒に歩くと楽しくなっちゃう！	Nice dog, you can walk with me!	n
person 2	あなたは何か飼わないのですか？	You don't have anything to take?	n
person 1	うちのアパート、ペットだめなんですよ。残念！ところで、好きな食べ物って、何かありますか？	I'm sorry, my apartment, my pet. What can I do for you?	n
person 2	わたしは何でも好きですよ、特に好き嫌いはしない方ですので。	I like everything, especially because I don't like it.	n
person 1	そうなんですね。わたし、ハヤシライスが好きなんですが、ハヤシライスでもグリーンピース入りのやつは嫌いなんですよー。あれ、ちょっと苦手で。	Well, I don't like rice rice, but he doesn't like green rice.	n
person 2	少し苦いですよね、良ければ今度おいしいハヤシライスの店を教えましょうか？	I'll tell you a little bit better next time, if you don't mind.	n
