# Supplementary material
Source: ML conference proceedings conference paper supplement (https://aclanthology.org/2022.eval4nlp-1.9)
Supplement: SupplementaryMaterial [file 0190.xlsx]

## Sheet: Sheet1
person	source	translation	evaluation: is this a good translation?
person 1	こんにちは、最近寒いですね…ペットのウサギも寒がるほどです 。	Hey, It's cold recently isn't it?... Cold enough that even my pet rabbit is cold.	y
person 2	ウサギ飼ってるんだ！？良いなー！私、友達がたくさんいるんだけど、友達にもウサギ飼ってる子いるよー！	You have a pet rabbit! Ah, man! I have a lot of friends, and one of them has a pet rabbit!	y
person 1	そうなんだ！ウサギってかわいいよね、私の一緒に住んでいる姉は嫌っているけどね…	Really? Rabbits are cute. My older sister who lives with me hates them though...	y
person 2	ええ！？そんな人いるんだ～。そういえば、わたし、まだ10代の学生なんだけど、あなたは？	What!? That kind of person exists? So I'm a student in my teens, but how about you?	y
person 1	若いわねぇ、私は30代のおばさんだわ、家政婦をしているのです。	You're young. I'm an old lady in my 30s, working as a maid.	y
person 2	ええ！30代！？全然見えないよ！もっともっと若いのかと思ったー！	What! 30s!? You don't look it at all! I thought you're way, way younger!	y
person 1	そう言われてうれしいわ、私も若作りしようかしら。	I'm glad to hear that, maybe I should try to look younger.	y
person 2	良いと思う！わたしね、メイクアップアーティストになりたくって、今、メイクの勉強もしてるの。今度、メイクについてお話ししない？	I think that's good! I want to be a make-up artist and I'm studying cosmetics now. Do you want to talk about make-up some time?	y
person 1	いいわね！ちょっとアドバイスも頂きたいわ。今度美術部の仲間に会って尊敬するゴッホの絵を見に行くのよ！	Good idea! I'd like to get some advice too. Soon I'll be going to meet my friends from the art club to go and see some paintings by Van Gogh, who I admire.	y
person 2	あなた、美術部なの？わたしは吹奏楽部。いつか、プロになって、メイクアップアーティストと二足のわらじで、世界中を飛び回ってやる！	You're in an art club? I'm in the brass band club. One day, I'll become a pro, and travel the world as a musician as well as a makeup artist!	y
