# Supplementary material
Source: ML conference proceedings conference paper supplement (https://aclanthology.org/2022.eval4nlp-1.9)
Supplement: SupplementaryMaterial [file 0190.xlsx]

## Sheet: Sheet1
person	source	translation	evaluation: is this a good translation?
person 1	こんにちは、最近寒いですね…ペットのウサギも寒がるほどです 。	Hello, you've been cold lately, too.	n
person 2	ウサギ飼ってるんだ！？良いなー！私、友達がたくさんいるんだけど、友達にもウサギ飼ってる子いるよー！	I've got lots of rabbits, but I have friends with rabbits!	n
person 1	そうなんだ！ウサギってかわいいよね、私の一緒に住んでいる姉は嫌っているけどね…	Yeah, the rabbit lives with me, but my sister doesn't like it!	n
person 2	ええ！？そんな人いるんだ～。そういえば、わたし、まだ10代の学生なんだけど、あなたは？	Well, there are still students like that, but you're still a teenager, aren't you?	n
person 1	若いわねぇ、私は30代のおばさんだわ、家政婦をしているのです。	Young man, I'm still 30 years old.	n
person 2	ええ！30代！？全然見えないよ！もっともっと若いのかと思ったー！	Oh, I thought you couldn't see more young!	n
person 1	そう言われてうれしいわ、私も若作りしようかしら。	I'm glad to hear that. I'm young, too.	n
person 2	良いと思う！わたしね、メイクアップアーティストになりたくって、今、メイクの勉強もしてるの。今度、メイクについてお話ししない？	Well, I think I'm getting pretty tired of studying the makeup now, too.	n
person 1	いいわね！ちょっとアドバイスも頂きたいわ。今度美術部の仲間に会って尊敬するゴッホの絵を見に行くのよ！	I'd like to see Van Gogh's friends again!	n
person 2	あなた、美術部なの？わたしは吹奏楽部。いつか、プロになって、メイクアップアーティストと二足のわらじで、世界中を飛び回ってやる！	You're gonna fly around with me one day in art and I'm gonna fly around in the middle of the world and I'm gonna blow your legs off!	n
