# Supplementary material
Source: ML conference proceedings conference paper supplement (https://aclanthology.org/2022.eval4nlp-1.9)
Supplement: SupplementaryMaterial [file 0191.xlsx]

## Sheet: Sheet1
person	source	translation	evaluation: is this a good translation?
person 1	こんにちは。今、犬を連れて散歩しているんだけど、このあたりで、赤い服を着た女性に会わなかったかい？	Good afternoon. I'm walking my dog right now, but have you seen a woman wearing red around here?	y
person 2	いや、そんな人はいなかったな、なにかあったのかい？	No, I haven't seen anyone like that. Did something happen?	y
person 1	いや、ちょっと人を探しているんだよ。まぁ、会わなかったのなら、かまわないさ。	No, I'm looking for someone. If you haven't seen her, then I'm not worried.	y
person 2	ふーん…実はわたしは自衛隊の仕事をしてましてね。責任感も強いのでそういうの気になるのさ。なにか手伝おうか？	Hmm... Actually, I work with the JSDF. I've got a strong sense of responsibility, so those kinds of things bother me. Can I lend a hand?	n
person 1	いや、大丈夫さ。ところで、自衛隊なのかい？どおりで、身体が丈夫そうなわけだ。わたしは探偵の職業柄、人の特徴にばかり目が行ってしまう。	No, it's okay. Well, you're in the JSDF? No wonder your body looks tough. I'm a detective, so I always notice people's features.	n
person 2	ははは、それは面白いことだ。それならわたしも面白いところがあるぞ、わたしは4月のエイプリルフール生まれなんだよ。	Hahaha, that's interesting. In that case, I've got something interesting too. I was born on April Fool's Day.	y
person 1	エイプリルフール生まれか。ということは、当日に誕生日だと言っても、信じてもらえなかったりするだろう？	You were born on April Fool's? That means, even if you say it's your birthday on the day, some people don't believe you, right?	y
person 2	ああ、もちろんだ。応援団に入っていた時はよく友達からからかわれていたのが悩みだったなぁ。あなたは悩みとかないのかい？	Yeah, of course. I used to be troubled by the jokes my friends made at my expense when I was in a cheer club. Do you have anything that bothers you?	n
person 1	悩みかぁ。片付けが苦手なんだが、そのことくらいだね。依頼者のことは頭の中でしっかり整理できるんだが、机の上はいつもめちゃくちゃさ。	Hmm. I'm bad at cleaning up, so maybe that’s it. I can keep my client's details nice and tidy in my head, but my desk is always a mess.	y
person 2	それは大変だ。整理整頓は心の落ち着きにもつながるからちゃんとしたほうがいいよ。	That's tough. Keeping things in order is connected to your presence of mind, so you should manage things properly.	n
person 1	心の落ち着きか。そうだね。それはちゃんとしなくてはいけないね。なんとか、頑張ってみるよ。	Presence of mind, that's right. I need to take care of that. I'll try my best, somehow.	y
person 2	ああ、まあどうにもならなかったら力にはなるよ。	Yeah, and if you really can't manage, I'll help you out.	y
