# Supplementary material
Source: ML conference proceedings conference paper supplement (https://aclanthology.org/2022.eval4nlp-1.9)
Supplement: SupplementaryMaterial [file 0191.xlsx]

## Sheet: Sheet1
person	source	translation	evaluation: is this a good translation?
person 1	こんにちは。今、犬を連れて散歩しているんだけど、このあたりで、赤い服を着た女性に会わなかったかい？	Hello, I'm taking a walk with a dog right now, but you didn't see a red dress around here, did you?	y
person 2	いや、そんな人はいなかったな、なにかあったのかい？	No, no, no, no, no, no, no, no, no.	n
person 1	いや、ちょっと人を探しているんだよ。まぁ、会わなかったのなら、かまわないさ。	No, I'm looking for someone. Well, I don't mind if I didn't see you.	n
person 2	ふーん…実はわたしは自衛隊の仕事をしてましてね。責任感も強いのでそういうの気になるのさ。なにか手伝おうか？	Well, do you really care if I'm helping myself with my own service?	n
person 1	いや、大丈夫さ。ところで、自衛隊なのかい？どおりで、身体が丈夫そうなわけだ。わたしは探偵の職業柄、人の特徴にばかり目が行ってしまう。	Well, by the way, are you sure you're good at your job as a professional detective?	n
person 2	ははは、それは面白いことだ。それならわたしも面白いところがあるぞ、わたしは4月のエイプリルフール生まれなんだよ。	Well, I'm gonna go to Philadelphia, and I'm gonna go where I'm from.	n
person 1	エイプリルフール生まれか。ということは、当日に誕生日だと言っても、信じてもらえなかったりするだろう？	Don't you think it's a birthday day when you tell me you're born?	n
person 2	ああ、もちろんだ。応援団に入っていた時はよく友達からからかわれていたのが悩みだったなぁ。あなたは悩みとかないのかい？	Yeah, of course, when you were in the service group, you were having a lot of trouble with your friends, weren't you?	n
person 1	悩みかぁ。片付けが苦手なんだが、そのことくらいだね。依頼者のことは頭の中でしっかり整理できるんだが、机の上はいつもめちゃくちゃさ。	Well, that's just the kind of trouble my client has to clean up his desk all the time.	n
person 2	それは大変だ。整理整頓は心の落ち着きにもつながるからちゃんとしたほうがいいよ。	That's a big deal. You should be able to calm down.	n
person 1	心の落ち着きか。そうだね。それはちゃんとしなくてはいけないね。なんとか、頑張ってみるよ。	You're gonna have to relax. I'm gonna try.	n
person 2	ああ、まあどうにもならなかったら力にはなるよ。	Oh, well, if you don't do anything, you'll be able to help.	n
