# Supplementary material
Source: ML conference proceedings conference paper supplement (https://aclanthology.org/2022.eval4nlp-1.9)
Supplement: SupplementaryMaterial [file 0192.xlsx]

## Sheet: Sheet1
person	source	translation	evaluation: is this a good translation?
person 1	こんにちはー！わたしはいつかメイクアップアーティストになりたいって思ってるの。	Hello! I want to become Mayhew someday.	n
person 2	こんにちは、それは素敵ですね！ 私はスタイリストです。職業柄、流行に敏感です。 あなたは、ファッションにも興味がありますか？	Hello, it's a beautiful list of art, and you're interested in fashion, too?	n
person 1	えー、すごい！スタイリストってかっこいい。おしゃれは大好きだよ！	Wow, I love the cool fashion list!	n
person 2	私とあなたで一緒に仕事をする日が来るかもしれないですね。私は英会話スクールに通っています。あなたは、何かならいごとはしていますか？	You and I might be working together the whole day because I'm going to work together, and I'm going to have a conversation with you, and I'm going all the way to Quentin!	n
person 1	今は学生だから部活してるだけ！吹奏楽部だよ。やっぱり英会話はやっといたほうがいいのかな？	You think we should just play a little game right now, huh?	n
person 2	吹奏楽では、なんの楽器をやっていたの？ 英会話は、これから仕事の幅を広げる為にも話せる方がいいと思いますよ。 わりと楽しｄえすよ。	Do you think we should talk about what we've got to do to get the music out of here?	n
person 1	吹奏楽ではトランペットだよ。そっか、将来のために英会話に通おうかな！	Let's talk about it for the future, shall we?	n
person 2	トランペット素敵ですね。 英会話は、オンラインでも出来るので自分に合う所を探すといいですよ。	It's a nice pet talk, so you can find a place on the line, too.	n
person 1	オンラインだと部活と学校で忙しいわたしでも出来そうだね！ところであなたは海外行ったことある？わたしはいつか行きたいと思っているよ。	Do you think I could go abroad someday?	n
person 2	そうですね。自分の都合に合わせられるのも魅力ですところで、私は今新しい靴を買おうかと思っていますが、おすっすめとかありますか？ 寒いのでブーツがいいかなって思ってるんですけど。	Do you think I could buy myself a new boot, too?	n
person 1	わたしはショートブーツを買ったよ！スカートでもパンツでもどちらでも合わせやすくってお気に入りなの。	I bought a short boots, and I like it better than anyone in my pants.	n
person 2	ショートブーツだと、どちらも合わせらるんですね！ それは、いいですね。 お店に見に行ってみます。	Look at those short boots, both of them go to the store!	n
