# Supplementary material
Source: ML conference proceedings conference paper supplement (https://aclanthology.org/2022.eval4nlp-1.9)
Supplement: SupplementaryMaterial [file 0192.xlsx]

## Sheet: Sheet1
person	source	translation	evaluation: is this a good translation?
person 1	こんにちはー！わたしはいつかメイクアップアーティストになりたいって思ってるの。	Good afternoon! One day, I want to become a make-up artist!	y
person 2	こんにちは、それは素敵ですね！ 私はスタイリストです。職業柄、流行に敏感です。 あなたは、ファッションにも興味がありますか？	Hello, that's wonderful! I'm a stylist. Because of my job, I'm sensitive to trends. Are you interested in fashion as well?	y
person 1	えー、すごい！スタイリストってかっこいい。おしゃれは大好きだよ！	Wow, that's awesome! Stylists are so cool. I love dressing up!	y
person 2	私とあなたで一緒に仕事をする日が来るかもしれないですね。私は英会話スクールに通っています。あなたは、何かならいごとはしていますか？	There may be a day when we work together. I go to an English conversation school. Do you take any lessons?	y
person 1	今は学生だから部活してるだけ！吹奏楽部だよ。やっぱり英会話はやっといたほうがいいのかな？	I'm a student now, so just club activities! I'm in the brass band club. I wonder if I should study English conversation?	y
person 2	吹奏楽では、なんの楽器をやっていたの？ 英会話は、これから仕事の幅を広げる為にも話せる方がいいと思いますよ。 わりと楽しｄえすよ。	What instrument do you play in the brass band? I think it's better to be able to speak English to increase your work opportunities in the future. It's actually pretty fun.	y
person 1	吹奏楽ではトランペットだよ。そっか、将来のために英会話に通おうかな！	I play the trumpet. Oh, maybe I'll take English conversation lessons for the future!	y
person 2	トランペット素敵ですね。 英会話は、オンラインでも出来るので自分に合う所を探すといいですよ。	The trumpet is lovely. You can even take English lessons online, so you should search for a place that best suits you.	y
person 1	オンラインだと部活と学校で忙しいわたしでも出来そうだね！ところであなたは海外行ったことある？わたしはいつか行きたいと思っているよ。	If it's online, even someone busy with school and club activities like me could do it! By the way, have you ever been overseas? I want to go some time.	y
person 2	そうですね。自分の都合に合わせられるのも魅力ですところで、私は今新しい靴を買おうかと思っていますが、おすっすめとかありますか？ 寒いのでブーツがいいかなって思ってるんですけど。	That's right. I think being able to fit it into your own schedule is appealing. That being said, I'm thinking of buying some new shoes, do you have any recommendations? It's cold, so I was thinking boots would be best.	y
person 1	わたしはショートブーツを買ったよ！スカートでもパンツでもどちらでも合わせやすくってお気に入りなの。	I bought some short boots! I like them because they go well with a skirt or pants.	y
person 2	ショートブーツだと、どちらも合わせらるんですね！ それは、いいですね。 お店に見に行ってみます。	Short boots go well with either one! That's a good idea. I'll go and check out a shop.	y
