# Supplementary material
Source: ML conference proceedings conference paper supplement (https://aclanthology.org/2022.eval4nlp-1.9)
Supplement: SupplementaryMaterial [file 0193.xlsx]

## Sheet: Sheet1
person	source	translation	evaluation: is this a good translation?
person 1	こんにちは。寒いですが、元気にしていましたか？	Good afternoon. It's cold, but have you been doing well?	y
person 2	元気ですよ！北海道生まれなんでね、寒いのは得意なんです。あなたは元気でしたか？	I feel fine! I was born in Hokkaido, so I like the cold. Have you been well?	n
person 1	はい、元気ですよ。職業柄、体が資本なので健康には気を遣っています。	Yes, I'm fine. My body is my best asset for my job, so I take care of my health.	y
person 2	あれ？ご職業はなんでしたっけ？	Huh? What is your job, again?	y
person 1	自衛隊員ですよ！そういうあなたの職業は？	I'm in the JSDF! What's your job?	y
person 2	わたしは介護福祉士です。自衛隊員だと今はお仕事忙しいでしょ？	I'm a care worker. If you're in the JSDF, you must be busy now, right?	y
person 1	そうなんです、なので余計に体調管理には気を配っています。介護だとあなたも大変そうですね。	That's right. That's why I'm taking extra care of my health. Being a care worker sounds tough too.	y
person 2	そうなんですよ。おかげで婚活も満足にできなくて、彼氏いない歴更新中です。	It is. Thanks to that, I can't even find a partner sufficiently, so I've been single for a long time.	n
person 1	あ、分かりますね！自衛隊もやはり結婚までは難しいなーと感じます。仕事に理解がないと無理ですね。	Ah, I know how you feel! Being in the JSDF, I feel that marriage would be hard. It's impossible if your partner doesn't understand your job.	y
person 2	そうですね。いずれは東京で、今より広い一軒家に住んでーと最近妄想ばっかり広がって困ってます。	Right. Recently, I just can't stop day dreaming about one day living in Tokyo in a house bigger than my current one.	y
