# Supplementary material
Source: ML conference proceedings conference paper supplement (https://aclanthology.org/2022.eval4nlp-1.9)
Supplement: SupplementaryMaterial [file 0193.xlsx]

## Sheet: Sheet1
person	source	translation	evaluation: is this a good translation?
person 1	こんにちは。寒いですが、元気にしていましたか？	Hello, I'm cold, but how are you?	n
person 2	元気ですよ！北海道生まれなんでね、寒いのは得意なんです。あなたは元気でしたか？	How are you?	n
person 1	はい、元気ですよ。職業柄、体が資本なので健康には気を遣っています。	Yes, I'm fine, so I'm fine, so I'm very healthy.	n
person 2	あれ？ご職業はなんでしたっけ？	What was your job?	y
person 1	自衛隊員ですよ！そういうあなたの職業は？	I'm a caretaker. What do you do?	n
person 2	わたしは介護福祉士です。自衛隊員だと今はお仕事忙しいでしょ？	I'm a carer. You're busy now, aren't you?	n
person 1	そうなんです、なので余計に体調管理には気を配っています。介護だとあなたも大変そうですね。	Yeah, well, you seem to be very concerned about your health care.	n
person 2	そうなんですよ。おかげで婚活も満足にできなくて、彼氏いない歴更新中です。	Well, I'm not happy with my marriage, and I'm not happy with my boyfriend.	n
person 1	あ、分かりますね！自衛隊もやはり結婚までは難しいなーと感じます。仕事に理解がないと無理ですね。	Well, I don't know if I can understand myself until I'm married.	n
person 2	そうですね。いずれは東京で、今より広い一軒家に住んでーと最近妄想ばっかり広がって困ってます。	Well, eventually, you've been in a lot more trouble living in Tokyo, and now you're in a lot of trouble.	n
