# Supplementary material
Source: ML conference proceedings conference paper supplement (https://aclanthology.org/2022.eval4nlp-1.9)
Supplement: SupplementaryMaterial [file 0194.xlsx]

## Sheet: Sheet1
person	source	translation	evaluation: is this a good translation?
person 1	こんにちは。最近の調子はいかがですか？	Hello. How are you today?	n
person 2	山の近くに住んでいてとても寒いですが元気です。	I live near the mountains, very cold.	n
person 1	そうですか、寒さには気を付けてお過ごしください。ご家族はご一緒にお住まいなんですか？	Oh, well, be careful with the cold. Do you live with your family?	y
person 2	いいえ、私はひとり暮らしです。あなたは？	No, I live alone. You live alone?	y
person 1	そうなんですか！わたしもひとり暮らしです。でも、スタイリストとして働いていて、家にいることはほとんどないので、そんなに寂しくはありません。	Yeah, I live alone too, but I don't miss the house very much.	n
person 2	スタイリストとはかっこいい職業ですね。私は広告代理店で働いていて毎日充実してます。	I work with the advertising agency every day and I work for the advertisement.	n
person 1	それはすごいですね！わたしから見れば、広告業界の方ってとてもセンスが良くて憧れの存在です。わたしも公私ともにセンスはいいほうだってよく言われるんですけどね。	Well, that's great because I have a very good sense of humor from the advertising industry, and I'd be better off without a license.	n
person 2	私はセンスがいいと言われたことがないので羨ましいです。流行をいち早く取り入れる方ですか？	I've never had a good sense of humor, so I envy you so quickly so quickly to get rid of the sculpture?	n
person 1	そうなんですよ！職業柄って言うこともありますけれど、流行には絶対に乗り遅れたくないんです。テレビや雑誌はもちろん、お客様の口コミやネット情報も見逃せません。	Well, of course I don't want to miss the TV, but of course I don't want to miss the news or the TV or the TV.	n
person 2	そういう方でないとスタイリストではやっていけないんでしょうね。	I don't want to miss the Internet list.	n
person 1	そうです。広告代理店の方もいろいろな情報を取り入れなければいけないので大変ですよね。	Yeah, well, the advertising agency needs to get a lot of information.	n
person 2	大変ですけど毎日楽しいです。お互い充実してますね。	But it's gonna be fun every day and we're gonna be together.	n
