# Supplementary material
Source: ML conference proceedings conference paper supplement (https://aclanthology.org/2022.eval4nlp-1.9)
Supplement: SupplementaryMaterial [file 0194.xlsx]

## Sheet: Sheet1
person	source	translation	evaluation: is this a good translation?
person 1	こんにちは。最近の調子はいかがですか？	Hey. How are you these days?	y
person 2	山の近くに住んでいてとても寒いですが元気です。	I live close to the mountains and it's very cold but I'm well.	y
person 1	そうですか、寒さには気を付けてお過ごしください。ご家族はご一緒にお住まいなんですか？	Is that so? Be careful of the cold. Do you live with your family?	y
person 2	いいえ、私はひとり暮らしです。あなたは？	No, I live alone. How about you?	y
person 1	そうなんですか！わたしもひとり暮らしです。でも、スタイリストとして働いていて、家にいることはほとんどないので、そんなに寂しくはありません。	I see! I live alone too. However, working as a stylist I'm hardly at home, so it's not so lonely.	y
person 2	スタイリストとはかっこいい職業ですね。私は広告代理店で働いていて毎日充実してます。	A stylist is a cool profession. I work at an advertising agency and every day is fulfilling.	y
person 1	それはすごいですね！わたしから見れば、広告業界の方ってとてもセンスが良くて憧れの存在です。わたしも公私ともにセンスはいいほうだってよく言われるんですけどね。	That's amazing! From my perspective, people in the advertising agency have great taste and I look up to them. People often tell me that I have good taste, at work and in my private life, too.	y
person 2	私はセンスがいいと言われたことがないので羨ましいです。流行をいち早く取り入れる方ですか？	I've never been told I have good taste before, so I'm envious. Do you pick up trends as quickly as you can?	n
person 1	そうなんですよ！職業柄って言うこともありますけれど、流行には絶対に乗り遅れたくないんです。テレビや雑誌はもちろん、お客様の口コミやネット情報も見逃せません。	That's right! It may also be because of my job, but I definitely don't want to be late on any trends. Naturally, I check TV and magazines, but I also never miss customer reviews or information on the internet.	y
person 2	そういう方でないとスタイリストではやっていけないんでしょうね。	I guess you can't work as a stylist without being that way.	y
person 1	そうです。広告代理店の方もいろいろな情報を取り入れなければいけないので大変ですよね。	Yes. Marketing agents also need to take in a lot of information, so it's tough for you too.	y
person 2	大変ですけど毎日楽しいです。お互い充実してますね。	It's tough but every day is fun. We're both fulfilled.	y
