# Supplementary material
Source: ML conference proceedings conference paper supplement (https://aclanthology.org/2022.eval4nlp-1.9)
Supplement: SupplementaryMaterial [file 0195.xlsx]

## Sheet: Sheet1
person	source	translation	evaluation: is this a good translation?
person 1	こんにちは。今日も寒いですね。	Good afternoon. Today's cold too.	n
person 2	はい、でもわたしは冬が好きです！お正月が誕生日なので毎年この時期はウキウキします。	Yeah, but I like winter! My birthday is on New Year's Day so every year I'm excited around this time.	y
person 1	少し過ぎましたが誕生日おめでとうございます。私は北海道生まれなので私も冬が好きです。	It's a bit belated, but happy birthday. I was born in Hokkaido so I also like winter.	y
person 2	そうなんですか。北海道も素敵なところですよね。外国人観光客にも人気じゃないですか？わたしは外国生まれなんですが、その国にいた時も北海道の話をよく聞きました。	Oh, really? Hokkaido is a lovely place. Isn't it popular with foreign tourists, too? I was born outside of Japan, but when I was in my home country I often heard stories about Hokkaido.	y
person 1	外国生まれなのはびっくりです。そちらはコロナ大丈夫ですか？私は一軒家に住んでいて家族と一緒なので家庭内感染に気をつけています。	I'm surprised you were born outside Japan! How is COVID-19 in your country? I live with my family so I'm trying to avoid family infection.	n
person 2	はい、我が家はなんとか全員無事です。兄もいるんですが、今のところはなんともないですね。同居ではないんですが。	Yeah, everyone in my family is fine somehow. I have an older brother, but so far nothing has happened to him. We don't live together, though.	y
person 1	よかったです。ただの風邪もひきたくないですね。お兄さんがいるんですね。私も頼れる兄が欲しかったです。兄弟で似ているんですか？	I'm glad. I don't even want to catch the common cold. You have an older brother? I wish I had an older brother I could rely on. Are you similar?	n
person 2	そうですね、わりと似ているかもしれません。どちらも彫りが深い顔立ちですので、外国人観光客と間違えられてしまうことが多いのがちょっとした悩みです。	Yeah, we may be quite similar. We both have clear-cut facial features, and so we're often mistaken for tourists from abroad. It's a little distressing.	n
person 1	日本には来たことがあるんですね？	So you've visited Japan before?	y
person 2	いえ、今は日本に住んでおりますので。国籍も日本です。	I live in Japan now, so my official country of residence is also Japan.	y
person 1	そうだったんですか。生まれが外国なのは素敵です。	Oh. It's nice that you were born abroad.	y
person 2	そうですか、そう言っていただけると悩みも軽くなりそうです！ありがとうございました。	Really? Hearing that relieves a bit of concerns! Thank you.	n
