# Supplementary material
Source: ML conference proceedings conference paper supplement (https://aclanthology.org/2022.eval4nlp-1.9)
Supplement: SupplementaryMaterial [file 0195.xlsx]

## Sheet: Sheet1
person	source	translation	evaluation: is this a good translation?
person 1	こんにちは。今日も寒いですね。	Hello, it's cold today.	y
person 2	はい、でもわたしは冬が好きです！お正月が誕生日なので毎年この時期はウキウキします。	Yes, but I love winter, because this is my birthday every year!	n
person 1	少し過ぎましたが誕生日おめでとうございます。私は北海道生まれなので私も冬が好きです。	It was a little too late for me, but I love winter too.	n
person 2	そうなんですか。北海道も素敵なところですよね。外国人観光客にも人気じゃないですか？わたしは外国生まれなんですが、その国にいた時も北海道の話をよく聞きました。	Well, it's a beautiful place for a foreigner, too, isn't it?	n
person 1	外国生まれなのはびっくりです。そちらはコロナ大丈夫ですか？私は一軒家に住んでいて家族と一緒なので家庭内感染に気をつけています。	I was surprised to have lived in the North Coast with your family when I heard that you were in the middle of an infection.	n
person 2	はい、我が家はなんとか全員無事です。兄もいるんですが、今のところはなんともないですね。同居ではないんですが。	Yes, they're all fine now, but they're not home.	n
person 1	よかったです。ただの風邪もひきたくないですね。お兄さんがいるんですね。私も頼れる兄が欲しかったです。兄弟で似ているんですか？	Good, 'cause I don't want to catch cold, and I just want to be your brother too, do you?	n
person 2	そうですね、わりと似ているかもしれません。どちらも彫りが深い顔立ちですので、外国人観光客と間違えられてしまうことが多いのがちょっとした悩みです。	Yeah, well, maybe it's a little too deep for anybody to know that there's a lot of people in the country who don't want to be followed.	n
person 1	日本には来たことがあるんですね？	Have you ever been to Japan before?	n
person 2	いえ、今は日本に住んでおりますので。国籍も日本です。	No, I live in Japan now, and I'm also a Japanese official.	n
person 1	そうだったんですか。生まれが外国なのは素敵です。	Well, that's nice of an alien, isn't it?	n
person 2	そうですか、そう言っていただけると悩みも軽くなりそうです！ありがとうございました。	Well, thank you very much for saying that, sir.	n
