# Supplementary material
Source: ML conference proceedings conference paper supplement (https://aclanthology.org/2022.eval4nlp-1.9)
Supplement: SupplementaryMaterial [file 0196.xlsx]

## Sheet: Sheet1
person	source	translation	evaluation: is this a good translation?
person 1	こんにちは！よろしくお願い致します。	Hello! Nice to meet you.	y
person 2	お願い致します。	Nice to meet you too.	y
person 1	最近、お仕事はいかがですか？わたしは広告代理店勤務なんですが、最近は仕事が減ってしまって大変です。	Recently, how is your work going? I work at an advertising agency, but there's less work recently and it's rough.	y
person 2	やっぱり影響あるんですね。私は教師ですが冬休み中なので少し楽をしております。	I see, so your work has taken a hit. I'm a teacher but it's winter break now so I'm taking it easy somewhat.	y
person 1	そうなんですか。昔を思い出しますね。わたしは昭和生まれだからでしょうか、学校の先生はちょっと厳しくて怖い存在でした。	Really? That reminds me of long ago. Maybe since I was born during the Showa period, my teachers at school were a bit strict and scary.	y
person 2	私も７０年代の昭和生まれなので気持ちわかります。	I was also born in the 70s during Showa so I understand your feeling.	y
person 1	そうですか、変なことを言って申し訳ありません。わたしは青森生まれなんですが、都会の華やかな生活に憧れてこの業界に入ったんです。	Oh, yeah? Sorry for saying something weird. I was born in Aomori, but I looked up to the luxurious big city life and entered my current industry.	y
person 2	私は秋田生まれです。近いですね。都会生活に憧れる気持ちもわかります。	I was born in Akita. It's close. I understand admiring the city life.	y
person 1	東北の方なんですね！親しみを感じます。あんなに嫌な故郷だったのに、今では懐かしく感じますよ。そのせいか、今でも郊外の山のそばに住んでいるんです。	You're from the Tohoku region! I feel acquainted. I disliked my hometown so much, but now it feels nostalgic. Maybe that's why I still live near the mountains in the suburbs.	y
person 2	景色が良さそうでいいですね。私は学校のそばに住んでいて通勤にはいいけど近過ぎて休日も学校が目に入ると少し嫌な気分になります。	It sounds like the scenery is nice. I live near the school so commuting to work is easy, but it's so close that I see the school on my days off and it dampens my mood.	y
