# Supplementary material
Source: ML conference proceedings conference paper supplement (https://aclanthology.org/2022.eval4nlp-1.9)
Supplement: SupplementaryMaterial [file 0196.xlsx]

## Sheet: Sheet1
person	source	translation	evaluation: is this a good translation?
person 1	こんにちは！よろしくお願い致します。	Hello. Nice to meet you.	y
person 2	お願い致します。	Please.	n
person 1	最近、お仕事はいかがですか？わたしは広告代理店勤務なんですが、最近は仕事が減ってしまって大変です。	How are you doing lately, sir? I work for an advertising agency.	n
person 2	やっぱり影響あるんですね。私は教師ですが冬休み中なので少し楽をしております。	I'm a little overdue, so I'm having a bit of a break.	n
person 1	そうなんですか。昔を思い出しますね。わたしは昭和生まれだからでしょうか、学校の先生はちょっと厳しくて怖い存在でした。	Remember, I was a little scared when I was born, because my school teacher was a little scared	n
person 2	私も７０年代の昭和生まれなので気持ちわかります。	I know how you feel about it too	n
person 1	そうですか、変なことを言って申し訳ありません。わたしは青森生まれなんですが、都会の華やかな生活に憧れてこの業界に入ったんです。	Well, I'm sorry to say something strange, but I was born in this big city, and I was born in this big city.	n
person 2	私は秋田生まれです。近いですね。都会生活に憧れる気持ちもわかります。	I'm from Akinobu, soon as I'm born, I understand how you feel about the city.	n
person 1	東北の方なんですね！親しみを感じます。あんなに嫌な故郷だったのに、今では懐かしく感じますよ。そのせいか、今でも郊外の山のそばに住んでいるんです。	You're in the Northwest, and now you feel like you don't want to live in that mountain anymore!	n
person 2	景色が良さそうでいいですね。私は学校のそばに住んでいて通勤にはいいけど近過ぎて休日も学校が目に入ると少し嫌な気分になります。	I'm a little close to my school, but I don't like to live near my school anymore.	n
