# Supplementary material
Source: ML conference proceedings conference paper supplement (https://aclanthology.org/2022.eval4nlp-1.9)
Supplement: SupplementaryMaterial [file 0197.xlsx]

## Sheet: Sheet1
person	source	translation	evaluation: is this a good translation?
person 1	こんにちは。今日こちらは暖かくて気持ちがいいです。	Hello. This is very warm today.	n
person 2	そうなんですね。わたしはずっと新潟に住んでいるんですが、いつも寒くて大変です。	Yes, I've been living in Omodaka for a long time, but it's always cold.	n
person 1	私は海の近くに住んでいるので反対に雪景色に憧れます。	I live near the sea so that I can see the snow on the other side.	n
person 2	いえいえ、雪下ろしが結構大変ですよ！でも、わたしも新潟から出たことがないので、南国の海のそばにはちょっと憧れています。	No, no, no, no, no, no, no, no, no, no, no, no, no, no, no, no, no, no, no, no, no, no, no, no, no, no, no, no, no, no, no, no, no, no, no, no.	n
person 1	雪おろし一度やってみたいです。私は以前沖縄に住んでいましたが沖縄は台風が多いのであんまりでした。	I'd like to try it once, but I used to live in Okinawa quite a lot of wind.	n
person 2	そうなんですか。どの地域も観光で訪れれば魅力的ですが、住むとなると大変なことがありますよね。お仕事はなんですか？わたしは整体師です。	Well, what if I was to meet any tourists in any area?	n
person 1	そうですね、観光と暮らすのではだいぶ違います。私はダンスが得意で、スポーツジムのクラスで教えています。整体師は体力的に大変そうですね。	Well, it's not so much as I teach you how to live with tourists, and I'm good at dancing with Jim's class.	n
person 2	ええ、おかげで仕事をしながら体を鍛えられているようなものです。ただ、わたしは足が短いので、筋肉が付いてもアンバランスなんじゃないかとちょっと悩んでいます。	Yeah, well, I'm a little hard to work with, so I'm a little hard to work with, so I'm a little bit hard to work with, so I'm a little hard on.	n
person 1	その時は同僚の整体師に整えてもらえそうですよね。	You said you'd be able to make your colleagues feel better after that.	n
person 2	いえいえ、同僚となるとなかなか難しいですね。ずっと実家にいるので、家事なども両親と分担できますから、まだ負担が少なくて済んでいるかもしれませんが。	No, it's hard to be friends, so I can't afford to spend the rest of my life at home with my parents.	n
