# Supplementary material
Source: ML conference proceedings conference paper supplement (https://aclanthology.org/2022.eval4nlp-1.9)
Supplement: SupplementaryMaterial [file 0197.xlsx]

## Sheet: Sheet1
person	source	translation	evaluation: is this a good translation?
person 1	こんにちは。今日こちらは暖かくて気持ちがいいです。	Good afternoon. It's nice and warm here today.	y
person 2	そうなんですね。わたしはずっと新潟に住んでいるんですが、いつも寒くて大変です。	Right? I've always lived in Niigata, but it's tough since it's always cold.	y
person 1	私は海の近くに住んでいるので反対に雪景色に憧れます。	I live by the ocean, so I adore snowscapes.	y
person 2	いえいえ、雪下ろしが結構大変ですよ！でも、わたしも新潟から出たことがないので、南国の海のそばにはちょっと憧れています。	No way! Shoveling snow is pretty tough! But I've never left Niigata before, so I somewhat long to be by the southern seas.	n
person 1	雪おろし一度やってみたいです。私は以前沖縄に住んでいましたが沖縄は台風が多いのであんまりでした。	I want to try shoveling snow once. I lived in Okinawa at one point but there are a lot of typhoons there so it wasn't for me.	y
person 2	そうなんですか。どの地域も観光で訪れれば魅力的ですが、住むとなると大変なことがありますよね。お仕事はなんですか？わたしは整体師です。	Is that so. Anywhere feels appealing when you visit for a trip, but living there brings some difficult things. What's your job? I'm a physical therapist.	n
person 1	そうですね、観光と暮らすのではだいぶ違います。私はダンスが得意で、スポーツジムのクラスで教えています。整体師は体力的に大変そうですね。	Yeah, taking a trip and living are quite different. I'm good at dancing, and I teach a class at a sports gym. Physical therapy sounds like it takes a lot of energy.	n
person 2	ええ、おかげで仕事をしながら体を鍛えられているようなものです。ただ、わたしは足が短いので、筋肉が付いてもアンバランスなんじゃないかとちょっと悩んでいます。	Yeah, thanks to that it's like my body is getting trained while I work. As I have short legs, I'm worried that even if I build muscle I'll look out of proportion.	y
person 1	その時は同僚の整体師に整えてもらえそうですよね。	It seems like in that case you could have a physical therapist coworker help you out.	n
person 2	いえいえ、同僚となるとなかなか難しいですね。ずっと実家にいるので、家事なども両親と分担できますから、まだ負担が少なくて済んでいるかもしれませんが。	No, it's pretty difficult when it comes to coworkers. I've always lived at home with my parents. I can share the housework with them, so I may be getting by with less effort.	y
