# Supplementary material
Source: ML conference proceedings conference paper supplement (https://aclanthology.org/2022.eval4nlp-1.9)
Supplement: SupplementaryMaterial [file 0198.xlsx]

## Sheet: Sheet1
person	source	translation	evaluation: is this a good translation?
person 1	こんにちは！お元気でしたか？	Hi! Have you been well?	y
person 2	こんにちは！元気にしてますよ！	Hi! I'm doing fine!	y
person 1	お元気で良かったです。ただ、最近わたしには悩みがあるんです。聞いてくれますか？	I'm glad you're doing well. Although, I'm troubled recently. Could you hear me out?	y
person 2	どうされたのですか？占いに興味があるのでお話を聞きながら占いもしますよ。	What's the matter? I'm interested in fortune telling, so I can tell yours while I listen.	y
person 1	わたしは外国生まれで彫りが深い顔立ちなんですが、そのせいか周囲から浮いて目立ってしまうんです。こんな時、占いだとどういう結果になりますか？	I was born in a foreign country and I've got clear-cut facial features. Maybe because of that I stand out from my surroundings. In this case, how does my fortune turn out?	y
person 2	外国生まれなのですね。彫りが深い顔立ちは気にしない方がいいです。いつか報われると結果に出ていますね。	So you were born overseas. You shouldn't worry about your facial features. Your fortune shows that one day you'll be rewarded.	y
person 1	そうなんですか。星座などはどうでしょうか？わたしは冬生まれで誕生日がお正月なんです。	Really? How about my horoscope? I was born in the winter and my birthday is New Year's Day.	y
person 2	わたしは12月生まれで大晦日が誕生日です。誕生日近いですね。この時期の生まれの人は今年尻上がりに運気が上がるようです。	I was born in December and my birthday is New Year's Eve. Our birthdays are close. It seems people born around this time will have good luck towards the end of this year.	n
person 1	そうなんですか！占っていただけで、しかも誕生日が近い方ということで気持ちが明るくなりました。お仕事はプロの占い師ではないんですよね？	Is that so! Having my fortune told, especially by someone with a birthday so close to mine, made me feel a bit cheerier. You're not a professional fortune teller, are you?	y
person 2	まだ興味があるくらいで仕事としてはできていません。普通の仕事をしながら飼ってる猫に癒されてます。	I'm still just interested in it so I haven't made it into a job. I work a regular job and get soothed by my pet cat.	n
