# Supplementary material
Source: ML conference proceedings conference paper supplement (https://aclanthology.org/2022.eval4nlp-1.9)
Supplement: SupplementaryMaterial [file 0198.xlsx]

## Sheet: Sheet1
person	source	translation	evaluation: is this a good translation?
person 1	こんにちは！お元気でしたか？	Hi, how are you?	y
person 2	こんにちは！元気にしてますよ！	Hi, how are you?	n
person 1	お元気で良かったです。ただ、最近わたしには悩みがあるんです。聞いてくれますか？	It's good to see you, but I've been having some trouble lately, okay?	n
person 2	どうされたのですか？占いに興味があるのでお話を聞きながら占いもしますよ。	I'm curious to hear about your superstition, too.	n
person 1	わたしは外国生まれで彫りが深い顔立ちなんですが、そのせいか周囲から浮いて目立ってしまうんです。こんな時、占いだとどういう結果になりますか？	I'm curious to hear you say that when I'm born in a deep country, I wonder what's going on around here, and what's going on?	n
person 2	外国生まれなのですね。彫りが深い顔立ちは気にしない方がいいです。いつか報われると結果に出ていますね。	You're supposed to be a foreigner, but you don't care about the fact that someday you'll get paid for it.	n
person 1	そうなんですか。星座などはどうでしょうか？わたしは冬生まれで誕生日がお正月なんです。	Well, what about the moon when I'm born?	n
person 2	わたしは12月生まれで大晦日が誕生日です。誕生日近いですね。この時期の生まれの人は今年尻上がりに運気が上がるようです。	I'm starting to wonder who's next year's birthday will be like this for my birth.	n
person 1	そうなんですか！占っていただけで、しかも誕生日が近い方ということで気持ちが明るくなりました。お仕事はプロの占い師ではないんですよね？	Well, I was just wondering if my birthday would be any closer to the work of professionals.	n
person 2	まだ興味があるくらいで仕事としてはできていません。普通の仕事をしながら飼ってる猫に癒されてます。	You still have a job to do as a cat does, don't you?	n
