# Supplementary material
Source: ML conference proceedings conference paper supplement (https://aclanthology.org/2022.eval4nlp-1.9)
Supplement: SupplementaryMaterial [file 0199.xlsx]

## Sheet: Sheet1
person	source	translation	evaluation: is this a good translation?
person 1	こんにちは。最近は、お仕事などの調子はいかがですか？	Hey. How is work and things going these days?	y
person 2	こんにちは、わたし実はまだ小学生なんです。あなたはどんなお仕事をされているのですか？	Hi, I'm actually an elementary student. What kind of work do you do?	y
person 1	えっ、そうでしたか。大人びて見えますよ。わたしも学校の教師で、しかも学校のそばに住んでいるんです。	Oh, really? You look mature. I'm a school instructor, and I live near the school.	n
person 2	学校の先生なのですね！なんだか偶然。	You're a teacher! What a coincidence.	y
person 1	70年代生まれですので、お母さんか、もしかしたらおばあさんくらいの年齢かもしれませんね。勉強はがんばっていますか？	I was born in the 70s, so I may be the same age as your mother or even grandmother. Are you studying hard in school?	y
person 2	勉強頑張っています。あと占い師になりたいので占いの勉強も頑張っています。	Yes, I am. I want to be a fortune teller so I'm studying fortune telling, too.	y
person 1	占い師ですか。夢があるお仕事でいいと思いますよ。スポーツは何かしていますか？わたしはこう見えても、昔はチアリーダーだったんです。	A fortune teller? I think that's a good, ambitious job. Do you play any sports? Despite my looks, I used to be a cheer leader.	y
person 2	かっこいいですね。わたしはバスケをしていますが、身長が低いせいかスタメンに選ばれたことがないんです。	That's cool. I play basketball, but I've never been picked as a starting member perhaps because of my height.	y
person 1	そうなんですか。でもまだ小学生ならこれからどんどん伸びていきますよ。お住まいはどちら？今は別の場所に住んでいますけれど、わたしは秋田出身なんですよ。	I see. If you're still a grade schooler, you'll still keep growing steadily. Where do you live? I live somewhere else now, but I'm originally from Akita.	n
person 2	寒いところでお生まれになったんですね。わたしは生まれも育ちも沖縄です。今はどちらにお住まいですか？	You lived in a cold place. I was born and raised in Okinawa. Where do you live now?	n
