# Supplementary material
Source: ML conference proceedings conference paper supplement (https://aclanthology.org/2022.eval4nlp-1.9)
Supplement: SupplementaryMaterial [file 0199.xlsx]

## Sheet: Sheet1
person	source	translation	evaluation: is this a good translation?
person 1	こんにちは。最近は、お仕事などの調子はいかがですか？	Hello, how's your work going lately?	y
person 2	こんにちは、わたし実はまだ小学生なんです。あなたはどんなお仕事をされているのですか？	Hi, I'm still a student, actually. What do you do?	y
person 1	えっ、そうでしたか。大人びて見えますよ。わたしも学校の教師で、しかも学校のそばに住んでいるんです。	Well, I'm still a student who lives next to my school, too.	n
person 2	学校の先生なのですね！なんだか偶然。	It's a coincidence!	n
person 1	70年代生まれですので、お母さんか、もしかしたらおばあさんくらいの年齢かもしれませんね。勉強はがんばっていますか？	Is it because you're 70, mom, maybe you're old enough to study your grandmother?	n
person 2	勉強頑張っています。あと占い師になりたいので占いの勉強も頑張っています。	I'm learning to be an explorer, so I'm doing my best.	n
person 1	占い師ですか。夢があるお仕事でいいと思いますよ。スポーツは何かしていますか？わたしはこう見えても、昔はチアリーダーだったんです。	Do you think I've ever been a good worker or a good sport leader before?	n
person 2	かっこいいですね。わたしはバスケをしていますが、身長が低いせいかスタメンに選ばれたことがないんです。	It's cool, I've never chosen a basketball, but I've never picked a tall man before.	n
person 1	そうなんですか。でもまだ小学生ならこれからどんどん伸びていきますよ。お住まいはどちら？今は別の場所に住んでいますけれど、わたしは秋田出身なんですよ。	Well, now you're still young, but I'm still from Nagano, which part of the world is it?	n
person 2	寒いところでお生まれになったんですね。わたしは生まれも育ちも沖縄です。今はどちらにお住まいですか？	Are you both born in Okinawa now?	n
