# Supplementary material
Source: ML conference proceedings conference paper supplement (https://aclanthology.org/2022.eval4nlp-1.9)
Supplement: SupplementaryMaterial [file 0200.xlsx]

## Sheet: Sheet1
person	source	translation	evaluation: is this a good translation?
person 1	こんにちは、わたしは生まれてこの方新潟から出たことがないんです。あなたはどちらに住まれていますか？	Hello. I was born here and haven't ever left Niigata. Where do you live?	n
person 2	わたしは群馬ですよ。わりと近いですね。	I live in Gunma. It's pretty close.	y
person 1	そうですね。わたしは整体師をしているのですが、あなたのお仕事は？	Yeah it is. I'm a physical therapist, but what do you do for work?	y
person 2	いえ、実は産休中なんです。前は事務職でしたけど。変な言い方ですが、妊娠中のせいか、お尻が大きくなってきてしまいました。	Actually, I'm on maternal leave. I used to do office work though. It's a strange way to put it, but maybe since I got pregnant, my butt has gotten bigger.	y
person 1	妊娠中は仕方がないですよ。赤ちゃんを守るためですもん。	You can't do anything about it while you're pregnant. It's to protect the baby.	y
person 2	そうですよね。また変なこと言いますけど、わたしは純日本風の顔立ちですので、南米の方みたいなグラマラスなスタイルって似合わないと自分では思っていたんです。	You're right. This is weird, too, but since I have pure Japanese facial features, I thought a more voluptuous figure like that of people from South America wouldn't fit me.	n
person 1	ギャップってやつで周りから見ると素敵ですよ！わたしは足が短いのが悩みで…。	Having a difference looks wonderful for other people! I'm insecure about my short legs.	n
person 2	そうですか？短くなんか見えませんよ！そういえば、海外って行かれたことあります？わたしは外国に憧れていて、外国語の勉強が趣味なんです。	Really? They don't look short! By the way, have you ever been abroad? I admire foreign countries, and my hobby is studying foreign languages.	y
person 1	かっこいいですね。わたし海外にも行ったことがないんです。実家暮らしで弟と中がいいので、一度一緒に海外旅行に行こうといっているところだったんですがオススメの国はありますか？	That's cool. I've never been overseas. I live at my parents house and get along well with my younger brother, so we were just talking about taking a trip abroad together. Are there any countries you'd recommend?	y
person 2	やっぱりブラジルですね。群馬ってブラジル人の方が多いので、親しみを感じるんです。国によっていろいろなスタイルの人がいて、美しさの基準も全然違うのが面白いですね。	I'd have to say Brazil. There are lots of Brazilian people in Gunma so they feel familiar. Depending on the country, there are people of all shapes and sizes. It's interesting that beauty standards are totally different.	y
person 1	群馬ってブラジルの方が多く住まれているのですね。俄然海外に興味が湧いてきました。	Oh, a lot of Brazilian people live in Gunma? I suddenly feel an interest in foreign countries.	y
person 2	ええ、ぜひ海外旅行してみてください。語学の勉強もオススメです。	Yeah, you should definitely travel abroad. I also recommend studying a language.	y
