# Supplementary material
Source: ML conference proceedings conference paper supplement (https://aclanthology.org/2022.eval4nlp-1.9)
Supplement: SupplementaryMaterial [file 0200.xlsx]

## Sheet: Sheet1
person	source	translation	evaluation: is this a good translation?
person 1	こんにちは、わたしは生まれてこの方新潟から出たことがないんです。あなたはどちらに住まれていますか？	Hello, I've never been a newborn man. Where do you live from?	n
person 2	わたしは群馬ですよ。わりと近いですね。	I'm a crowd horse. It's close to me.	n
person 1	そうですね。わたしは整体師をしているのですが、あなたのお仕事は？	Yes, I'm a researcher, but what do you do?	n
person 2	いえ、実は産休中なんです。前は事務職でしたけど。変な言い方ですが、妊娠中のせいか、お尻が大きくなってきてしまいました。	No, actually, it was a big deal before, but I got pregnant, and I got pregnant and I got pregnant and I got pregnant.	n
person 1	妊娠中は仕方がないですよ。赤ちゃんを守るためですもん。	I had no choice but to protect my baby.	n
person 2	そうですよね。また変なこと言いますけど、わたしは純日本風の顔立ちですので、南米の方みたいなグラマラスなスタイルって似合わないと自分では思っていたんです。	Yes, I think it's strange to say that I'm not the face of the United States of America, but I think I'm the face of my own style.	n
person 1	ギャップってやつで周りから見ると素敵ですよ！わたしは足が短いのが悩みで…。	You see, Jessup, I like to see him around me.	n
person 2	そうですか？短くなんか見えませんよ！そういえば、海外って行かれたことあります？わたしは外国に憧れていて、外国語の勉強が趣味なんです。	Have I ever been abroad?	n
person 1	かっこいいですね。わたし海外にも行ったことがないんです。実家暮らしで弟と中がいいので、一度一緒に海外旅行に行こうといっているところだったんですがオススメの国はありますか？	I've been abroad with my brother, Oslo, and I've been abroad once.	n
person 2	やっぱりブラジルですね。群馬ってブラジル人の方が多いので、親しみを感じるんです。国によっていろいろなスタイルの人がいて、美しさの基準も全然違うのが面白いですね。	You know, there's a lot of people in Brazil who feel much better about the lifestyle in Brazil, don't you?	n
person 1	群馬ってブラジルの方が多く住まれているのですね。俄然海外に興味が湧いてきました。	You've been more interested in Brazil than the Turks.	n
person 2	ええ、ぜひ海外旅行してみてください。語学の勉強もオススメです。	Yes, I'd like to travel abroad and study.	n
