# Supplementary material
Source: ML conference proceedings conference paper supplement (https://aclanthology.org/2022.eval4nlp-1.9)
Supplement: SupplementaryMaterial [file 0201.xlsx]

## Sheet: Sheet1
person	source	translation	evaluation: is this a good translation?
person 1	こんにちは！さっきね、雑誌の星占い見たら、12月生まれは今年開運するみたいなのー！	Hey, if you look at the news star of the magazine, December will be a lucky year!	n
person 2	こんにちは、運勢良いみたいで羨ましい。わたしは去年妻と熟年離婚したんですよ。今年は開運するといいなあ。	Hello, I'm lucky to be married to my wife last year.	n
person 1	それは辛かったね。占いって、予測するだけじゃなくて、色々アドバイスがあるから、参考にするといいよ！	That was hard to predict, 'cause I have a lot of advice for you!	n
person 2	定年退職してさぁこれから第二の人生と思っていたからかなり落ち込んでいたんです。参考にしてみますね。	Now, I've been thinking about resigning my retirement for two years now, and I've been very disappointed in my second life.	n
person 1	えー！退職して離婚って、奥さん、酷いね。お子さんは？	You're married to your wife, aren't you?	n
person 2	子供には恵まれなかったんです。仕事漬けで妻を顧みなかったわたしにも責任はあるのですが。あなたは結婚してらっしゃるのです？	Didn't have a child who didn't take care of my wife for work, did I?	n
person 1	ううん。まだ独身だよ。子ども代わりとはいかないけど、猫を飼ってみたら？猫、いいよー！うちにもいるけど、超癒やされる！	No, I'm still married, but I can't get a cat, can I?	n
person 2	猫かぁ。それもありだなぁ。わたし趣味といえば釣りばっかりだったから、何か生活に新しいことが欲しかったんだよね。	Oh, no, I just wanted a new cat, and I had something new to eat.	n
person 1	釣りって、釣ってきた魚を自分でさばいて料理したりも？	Do you cook your own fish, or do you eat your own fish?	n
person 2	そればお恥ずかしい話釣った魚は元奥さんに任せっきりだったんだよね。あなたはお料理できるの？	So the fish that got tired of being your wife, you can cook?	n
person 1	うん、できるよ！あなたは、これからは自分でさばけるようにならなきゃね！それよりも婚活した方が早いかな？	Yeah, you can do better than getting yourself married, right?	n
person 2	髪の毛の薄いおじさんでも需要あるかなあ？	Do you have any more money for your hair?	n
