# Supplementary material
Source: ML conference proceedings conference paper supplement (https://aclanthology.org/2022.eval4nlp-1.9)
Supplement: SupplementaryMaterial [file 0201.xlsx]

## Sheet: Sheet1
person	source	translation	evaluation: is this a good translation?
person 1	こんにちは！さっきね、雑誌の星占い見たら、12月生まれは今年開運するみたいなのー！	Hi! I just looked at my horoscope in a magazine a bit ago, and apparently people born in December will be lucky this year!	y
person 2	こんにちは、運勢良いみたいで羨ましい。わたしは去年妻と熟年離婚したんですよ。今年は開運するといいなあ。	Hey. I'm jealous, it seems your fortune is good. I got a divorce with my wife last year after being together for a long time. I hope I have good luck this year.	y
person 1	それは辛かったね。占いって、予測するだけじゃなくて、色々アドバイスがあるから、参考にするといいよ！	That must have been difficult. Fortune telling isn't just about predicting, but also giving advice! You should check it out.	y
person 2	定年退職してさぁこれから第二の人生と思っていたからかなり落ち込んでいたんです。参考にしてみますね。	I retired and thought my second life would finally be starting, so I'm feeling very down. I'll give it a look.	y
person 1	えー！退職して離婚って、奥さん、酷いね。お子さんは？	What! Your wife divorced you after retirement? How awful. Do you have children?	y
person 2	子供には恵まれなかったんです。仕事漬けで妻を顧みなかったわたしにも責任はあるのですが。あなたは結婚してらっしゃるのです？	We weren't blessed with children. Part of the fault is mine for being absorbed in my work and not caring enough about my wife. Are you married?	y
person 1	ううん。まだ独身だよ。子ども代わりとはいかないけど、猫を飼ってみたら？猫、いいよー！うちにもいるけど、超癒やされる！	No. I'm still single. It's not a replacement for a child, but how about getting a cat? Cats are great! I have one at home, and it's so soothing.	n
person 2	猫かぁ。それもありだなぁ。わたし趣味といえば釣りばっかりだったから、何か生活に新しいことが欲しかったんだよね。	Yeah, a cat, that's an idea. My only hobby has always been fishing, so I wanted something new in life.	y
person 1	釣りって、釣ってきた魚を自分でさばいて料理したりも？	When you go fishing, do you clean and eat the fish you catch?	y
person 2	そればお恥ずかしい話釣った魚は元奥さんに任せっきりだったんだよね。あなたはお料理できるの？	It's an embarrassing story. I always left the work to my wife regarding the fish I brought back. Can you cook?	y
person 1	うん、できるよ！あなたは、これからは自分でさばけるようにならなきゃね！それよりも婚活した方が早いかな？	Yeah, I can! You need to be able to clean fish yourself from now on! Would it be faster to look for a partner?	n
person 2	髪の毛の薄いおじさんでも需要あるかなあ？	I wonder if there's a demand for balding old men?	y
