# Supplementary material
Source: ML conference proceedings conference paper supplement (https://aclanthology.org/2022.eval4nlp-1.9)
Supplement: SupplementaryMaterial [file 0202.xlsx]

## Sheet: Sheet1
person	source	translation	evaluation: is this a good translation?
person 1	こんにちはわたしは小学生です。将来の夢は占い師になることです。	Hello. I'm a student of the future, and I'm going to be a director of the future.	n
person 2	すごいねー。もしかして、今も何か占えたりするの？	Can you read anything now?	n
person 1	星座占いを勉強しているんです。わたしは乙女座なんですがあなたは何座ですか？	I'm studying the starship, but what are you?	n
person 2	わ、奇遇！わたしもおとめ座なんだけどさ、将来ネイリストになれるかどうか、占ってみて！	Oh, my God, I'm having a bad day, too, but see if I can get a list of the future list!	n
person 1	はい！次回結果をお伝えしますね。	Yes, I'll give you the results next time.	y
person 2	ありがとう！いまさあ、エステテシャンをやってるんだけど、どうも合わないみたいなんだよね。これもやっぱり、占いに出るもの？	Thank you. I'm working on Estems right now, but it seems to me that this is not going to be a good time to show up, is it?	n
person 1	星の導きってやつかもですね。大人になるのはやっぱり大変ですか？	Is it hard to grow up to be an adult?	n
person 2	大変だよ、大変！でも、宮沢賢治が書いてたように、雨ニモマケズ、風ニモマケズの精神で突き進むしかないのよ。	Oh, my God, it's hard to read, but it's like the wind of the court has been written in the rain.	n
person 1	大人になるのが怖くなってきました。わたし今の悩みは身長がクラスで一番低いこととニンジンが嫌いなことしかなかったんです。	I'm starting to feel like I'm the youngest person in my class, and I just don't like carrots and carrots in my class anymore.	n
person 2	可愛いなあ。ニンジン嫌いは克服できそうなの？	Look, you don't like carrots?	n
person 1	全然だめです。ママがあの手この手で食べさせようとしてきてトラウマになりそうです。	No, no, no, no, no, no, no, no, no, no, no, no, no, no, no, no, no, no, no, no, no, no, no, no, no, no, no, no, no, no, no, no, no, no, no, no, no, no, no, no, no, no, no, no, no, no, no, no, no, no, no, no, no, no, no, no, no, no, no, no, no, no, no, no, no, no, no, no, no, no, no, no, no, no, no, no, no, no, no, no, no, no, no, no, no, no, no, no, no, no, no, no, no, no, no, no, no, no, no, no!	n
person 2	それはしんどいね！ママの占い結果は、意地悪って出てるかもね！		n
