# Supplementary material
Source: ML conference proceedings conference paper supplement (https://aclanthology.org/2022.eval4nlp-1.9)
Supplement: SupplementaryMaterial [file 0202.xlsx]

## Sheet: Sheet1
person	source	translation	evaluation: is this a good translation?
person 1	こんにちはわたしは小学生です。将来の夢は占い師になることです。	Hi I'm a grade schooler. My dream for the future is to become a fortune teller.	y
person 2	すごいねー。もしかして、今も何か占えたりするの？	Wow. Do you by any chance do some reading now?	n
person 1	星座占いを勉強しているんです。わたしは乙女座なんですがあなたは何座ですか？	I'm studying astrology. I'm a Virgo, what's your sign?	y
person 2	わ、奇遇！わたしもおとめ座なんだけどさ、将来ネイリストになれるかどうか、占ってみて！	Wow, what a coincidence! I'm a Virgo too. Try and read whether I can be a manicurist in the future or not!	y
person 1	はい！次回結果をお伝えしますね。	Okay! I'll let you know next time I see you.	y
person 2	ありがとう！いまさあ、エステテシャンをやってるんだけど、どうも合わないみたいなんだよね。これもやっぱり、占いに出るもの？	Thank you! Right now I'm working as an aesthetician but it doesn't seem to fit me. Does this kind of stuff show up in fortunes too?	y
person 1	星の導きってやつかもですね。大人になるのはやっぱり大変ですか？	It may be the thing called stellar guidance. Is it tough being an adult?	n
person 2	大変だよ、大変！でも、宮沢賢治が書いてたように、雨ニモマケズ、風ニモマケズの精神で突き進むしかないのよ。	It's tough, very tough! But just like Miyazawa Kenji wrote, you just have to push forward with the spirit of: "Be not defeated by the rain, Nor let the wind prove your better."	n
person 1	大人になるのが怖くなってきました。わたし今の悩みは身長がクラスで一番低いこととニンジンが嫌いなことしかなかったんです。	I'm scared of growing up now. Right now the only things I'm worried about are disliking carrots and being the shortest in my class.	y
person 2	可愛いなあ。ニンジン嫌いは克服できそうなの？	That's cute. Do you think you can overcome your dislike for carrots?	y
person 1	全然だめです。ママがあの手この手で食べさせようとしてきてトラウマになりそうです。	Not at all. My mom has tried everything to get me to eat them, it might cause some trauma.	y
person 2	それはしんどいね！ママの占い結果は、意地悪って出てるかもね！	That's rough! Your mom's fortune may come out as "mean!"	y
