# Supplementary material
Source: ML conference proceedings conference paper supplement (https://aclanthology.org/2022.eval4nlp-1.9)
Supplement: SupplementaryMaterial [file 0203.xlsx]

## Sheet: Sheet1
person	source	translation	evaluation: is this a good translation?
person 1	こんにちは！ふぅー、臨月に入ったんで、先週から仕事は産休になったんですよ。	Good afternoon! Phew, my baby is due this month so I've been on maternal leave since last week.	y
person 2	こんにちは！そうだったんですね。調子は良いですか？	Hello! I see. Is it going well?	y
person 1	ちょっと足がむくみますけど、元気いっぱいです。おかげで、普段あまり出来なかった大好きな英語の勉強がはかどります！	My legs are a little swollen, but I'm full of energy. Thanks to that, I've been able to catch up on English studying which I love but normally can't do!	y
person 2	英語を勉強されてるんですね！わたしは高校生なので、もう今は勉強とは遠ざかりたい年頃ですよ。	Oh, you study English! I'm a high school student, so I'm the age when I want to stay far away from studying.	n
person 1	あら、そうだったのか！英語は嫌い？外国に興味ない？	Oh, is that so! You don't like English? You're not interested in overseas?	n
person 2	うーん、陸上部に入っていて、部員に海外の人がいるので、ちょっとは興味あるかな。	Hmm. I'm in the track and field club and there's another member from overseas, so maybe I'm a little interested.	y
person 1	海外の人がいるなら、英語教えてもらえばいいのに！でも外国の人って、彫りの深い顔が多くて羨ましくない？	If there's someone from abroad in your club, you should have them teach you English! Aren't you envious that so many foreigners have such defined facial features?	y
person 2	そうだね、教えてもらおうかなあ。確かに彫りがみんな深いよね。わたしはおばあちゃん子で、生粋の日本人なので、なかなか身につかなそう。	Maybe I should have them teach me. Yeah, they do have defined features. I'm fond of my grandmother and I'm super Japanese, so English may not stick.	n
person 1	わたしも生粋の日本人だから、この純和風な顔だちが好きじゃないんだ－。まあ、お尻が大きいから、外国の人にはモテるかもしれないけど！	I'm also 100 percent Japanese, so I don't like my pure Japanese facial features. But, I have a big butt, so I might be popular among foreigners!	y
person 2	確かに！好き嫌いとかありますか？わたしは子どもみたくピーマンが嫌いで、好き嫌いが多いと、陸上にも影響しそうで悩んでいますよ。	That's true! Are there any foods you like or dislike? Like a child, I hate green peppers, and I'm so picky that I'm worried about it having an effect on my track and field.	y
person 1	好き嫌いは良くないよー！わたしは何でも好きだし、生まれてくる子どもも、好き嫌いなく育てたいなあ。	It's not good to be picky! I like everything, and I want to raise my child to be the same once they're born.	y
person 2	そうだよね。これからは食べ物にも気をつけて、一流のアスリートを目指すよ！	You're right. From now on I'll be more careful about what I eat, and aim to be a top athlete!	y
