# Supplementary material
Source: ML conference proceedings conference paper supplement (https://aclanthology.org/2022.eval4nlp-1.9)
Supplement: SupplementaryMaterial [file 0203.xlsx]

## Sheet: Sheet1
person	source	translation	evaluation: is this a good translation?
person 1	こんにちは！ふぅー、臨月に入ったんで、先週から仕事は産休になったんですよ。	Hello, I've been in the moon for the last week, so I've got to get to work.	n
person 2	こんにちは！そうだったんですね。調子は良いですか？	How are you doing?	n
person 1	ちょっと足がむくみますけど、元気いっぱいです。おかげで、普段あまり出来なかった大好きな英語の勉強がはかどります！	A little bit better, but I couldn't get enough to learn English.	n
person 2	英語を勉強されてるんですね！わたしは高校生なので、もう今は勉強とは遠ざかりたい年頃ですよ。	You're studying English because I'm high school and I'm old enough to get away with it.	n
person 1	あら、そうだったのか！英語は嫌い？外国に興味ない？	Oh, you don't like English?	n
person 2	うーん、陸上部に入っていて、部員に海外の人がいるので、ちょっとは興味あるかな。	Well, there are a few foreign people in the land who are interested in overseas.	n
person 1	海外の人がいるなら、英語教えてもらえばいいのに！でも外国の人って、彫りの深い顔が多くて羨ましくない？	If there are people overseas, you can tell me, but you don't envy many deep faces, do you?	n
person 2	そうだね、教えてもらおうかなあ。確かに彫りがみんな深いよね。わたしはおばあちゃん子で、生粋の日本人なので、なかなか身につかなそう。	All right, let me tell you something, everybody, I'm really deep, very, very, very, very, very, very, very, very, very, very, very, very, very, very, very, very, very, very, very, very, very, very, very, very, very, very, very, very, very, very, very, very, very, very, very, very, very, very, very, very, very, very, very, very, very, very, very, very, very, very, very, very, very, very, very, ver…	n
person 1	わたしも生粋の日本人だから、この純和風な顔だちが好きじゃないんだ－。まあ、お尻が大きいから、外国の人にはモテるかもしれないけど！		n
person 2	確かに！好き嫌いとかありますか？わたしは子どもみたくピーマンが嫌いで、好き嫌いが多いと、陸上にも影響しそうで悩んでいますよ。	Are you sure I don't like being a kid?	n
person 1	好き嫌いは良くないよー！わたしは何でも好きだし、生まれてくる子どもも、好き嫌いなく育てたいなあ。	I don't like being raised by children, but I like being raised!	n
person 2	そうだよね。これからは食べ物にも気をつけて、一流のアスリートを目指すよ！	Yeah, you should be careful with your food, Astrid.	n
