# Supplementary material
Source: ML conference proceedings conference paper supplement (https://aclanthology.org/2022.eval4nlp-1.9)
Supplement: SupplementaryMaterial [file 0204.xlsx]

## Sheet: Sheet1
person	source	translation	evaluation: is this a good translation?
person 1	こんにちは！最近わたしは定年退職しまして、釣りを趣味に充実した日々を過ごしています。調子はいかがですか？	Hello! I recently retired and am living a life enriched by my fishing. How are you?	n
person 2	こんにちは！定年とは、今までお疲れさまでした。わたしは、最近、この暑さにやられてます。苦手なんですよー、夏！	Hello! If you're retired, you must have worked hard up until now. These days I'm struggling with the heat. I'm not a fan of summer!	y
person 1	確かに最近の日本の夏はつらいですよね。髪の毛が薄くなってきたもので、帽子をかぶると蒸れてしかたありません。	The summers in Japan are too hot recently, aren't they. My hair is thinning, so when I wear a hat it gets so stuffy.	y
person 2	帽子って蒸れますよねー。わたしは山形の生まれだけど、あっちは全国最高気温をたたき出しても、結構カラッとしてましたよ！	Hats do get hot and sweaty. I was born in Yamagata, and over there it's completely dry even with record breaking temperatures!	y
person 1	東北は暑いとはいえ、東京なんかに比べたら涼しい方ではありますよね。普段は何をされているんですか？	While Tohoku is hot, compared to Tokyo it's on the cooler side. What do you normally do for work?	y
person 2	普段はコンビニの店員をしてます。コンビニって、ガンガンにクーラーかけてるから天国なんですよ！	I work at a convenience store. Convenience stores always blast their air conditioner so it's heaven!	y
person 1	クーラーが苦手なので、あまり使っていませんね。言いにくい話ですが、熟年離婚した妻がいた頃は、クーラーガンガンでちょっと過ごしにくいものがありました。	I don't like air conditioner, so I don't use it often. It's a bit awkward to talk about, but when I was still with my wife before we got divorced following my retirement, she always blasted the air conditioner and at times it was uncomfortable.	n
person 2	結婚は生活っていいますもんね。そういうのの不一致って、大きいですよね。	They do say marriage is life. Those kinds of incompatibilities are a big deal.	y
person 1	そうですね、日々の積み重ねが影響してきますね。ところでわたしは虫歯が1本もないのですが、いつまでも若々しくいられるように、オシャレや健康にも気を使っています。	Yes, the daily little things pile up and effect it. Anyway, I don't have a single cavity. In order to stay young, I take care of my health and fashion.	n
person 2	スゴイ、虫歯がないって自慢していいですよ！わたしなんて、お菓子を食べながら漫画を読んだあと、そのまま寝ちゃったりして、虫歯だらけなんです。	Wow, not having any cavities is something to brag about! Personally, I do things like go to sleep without brushing my teeth after eating snacks while reading manga, so I'm full of cavities.	n
