# Supplementary material
Source: ML conference proceedings conference paper supplement (https://aclanthology.org/2022.eval4nlp-1.9)
Supplement: SupplementaryMaterial [file 0204.xlsx]

## Sheet: Sheet1
person	source	translation	evaluation: is this a good translation?
person 1	こんにちは！最近わたしは定年退職しまして、釣りを趣味に充実した日々を過ごしています。調子はいかがですか？	How's the day I retired and spent on the fishing?	n
person 2	こんにちは！定年とは、今までお疲れさまでした。わたしは、最近、この暑さにやられてます。苦手なんですよー、夏！	Hello, I haven't been able to handle this heat in a while.	n
person 1	確かに最近の日本の夏はつらいですよね。髪の毛が薄くなってきたもので、帽子をかぶると蒸れてしかたありません。	It's been a long summer since the Japanese days, and I haven't been able to wash my hair in months.	n
person 2	帽子って蒸れますよねー。わたしは山形の生まれだけど、あっちは全国最高気温をたたき出しても、結構カラッとしてましたよ！	I was born in the mountains, but that's the best temperature in the country!	n
person 1	東北は暑いとはいえ、東京なんかに比べたら涼しい方ではありますよね。普段は何をされているんですか？	No, what's the hottest thing in Tokyo is that it's so hot?	n
person 2	普段はコンビニの店員をしてます。コンビニって、ガンガンにクーラーかけてるから天国なんですよ！	Usually I work for a convenience store, and it's in heaven for cancer!	n
person 1	クーラーが苦手なので、あまり使っていませんね。言いにくい話ですが、熟年離婚した妻がいた頃は、クーラーガンガンでちょっと過ごしにくいものがありました。	It's hard to say, because I've spent a lot of time talking to my wife when she's having a little bit of a difficult divorce.	n
person 2	結婚は生活っていいますもんね。そういうのの不一致って、大きいですよね。	Marriage is such a big deal, isn't it?	n
person 1	そうですね、日々の積み重ねが影響してきますね。ところでわたしは虫歯が1本もないのですが、いつまでも若々しくいられるように、オシャレや健康にも気を使っています。	Well, every day, my teeth are getting better and more healthy, so, by the way, I don't care.	n
person 2	スゴイ、虫歯がないって自慢していいですよ！わたしなんて、お菓子を食べながら漫画を読んだあと、そのまま寝ちゃったりして、虫歯だらけなんです。	I'm not proud to read that, but I'm tired of eating those delicious comic books and eating them all the time.	n
