# Supplementary material
Source: ML conference proceedings conference paper supplement (https://aclanthology.org/2022.eval4nlp-1.9)
Supplement: SupplementaryMaterial [file 0205.xlsx]

## Sheet: Sheet1
person	source	translation	evaluation: is this a good translation?
person 1	こんにちは。よろしくお願い致します。	Hello. Nice to meet you.	y
person 2	こんにちは！あなたにはなにかハマっているものや趣味はありますか？	Hello. Do you have anything in your mind or something?	n
person 1	はい、わたしは岩手県出身なので、宮沢賢治の小説を読むのが大好きなんです。	Yes, I love the novel from Iwazaki-sensei.	n
person 2	地元に著名な作家さんが居るってうらやましいです！わたしは映画観賞が趣味です。お仕事はなにかされていますか？	I'm jealous of a local writer who's jealous of his work!	n
person 1	ええ、エステティシャンなんです。ただ、同じような分野ですが、ネイリストのほうがいいかなーって思ってるんですけど。	Yeah, I'm jealous of the same book as Evangeline.	n
person 2	わぁ、癒しを届けられる仕事って素敵！わたしはキャビンアテンダントなんですが、お仕事にぴったりのネイルとか、個人的にお願いしてみたいわ！	Oh, my God, I'm a good worker, but I'd like to take care of my work, please.	n
person 1	ぜひぜひ、わたしが転職できたらお店に来てくださいね。ペットは飼われていますか？うちには熱帯魚がいるんですよ。	Would you like me to come to the store and visit my pet if I could get a job?	n
person 2	熱帯魚！実はわたしには今好きな人が居るんですけど、その人も熱帯魚が好きなので、色々知りたいと思っていたところなんです！	Actually, I like to know a lot of people, but I like to know a lot of hot fish!	n
person 1	そうなんですね。恋人の方と共通の趣味があるって嬉しいことですよね。キャビンアテンダントさんだとお忙しいと思いますが、熱帯魚の世話ってそんなに難しくないのでおすすめです。	Well, I'm glad you have a common hobby with your lover, Miss Cathcart, and I'm glad you have a lot of work to do.	n
person 2	よいことを聞きました！わたしの誕生日は11月22日、いい夫婦の日なんですが、自分へのプレゼントに熱帯魚を飼ってみようかしら。	I've got two very hard days to ask for a fish in November, so let's take care of myself!	n
