# Supplementary material
Source: ML conference proceedings conference paper supplement (https://aclanthology.org/2022.eval4nlp-1.9)
Supplement: SupplementaryMaterial [file 0205.xlsx]

## Sheet: Sheet1
person	source	translation	evaluation: is this a good translation?
person 1	こんにちは。よろしくお願い致します。	Hello. Pleased to meet you.	y
person 2	こんにちは！あなたにはなにかハマっているものや趣味はありますか？	Hello! Do you have any hobbies or is there anything you're in to?	y
person 1	はい、わたしは岩手県出身なので、宮沢賢治の小説を読むのが大好きなんです。	Yes, I'm from Iwate Prefecture, so I love reading Miyazawa Kenji's novels.	y
person 2	地元に著名な作家さんが居るってうらやましいです！わたしは映画観賞が趣味です。お仕事はなにかされていますか？	I'm jealous that you have such a famous author in your hometown! My hobby is watching movies. What do you do for a living?	y
person 1	ええ、エステティシャンなんです。ただ、同じような分野ですが、ネイリストのほうがいいかなーって思ってるんですけど。	I'm an aesthetician. But, although it's a similar field, I feel like I'd rather be a manicurist.	y
person 2	わぁ、癒しを届けられる仕事って素敵！わたしはキャビンアテンダントなんですが、お仕事にぴったりのネイルとか、個人的にお願いしてみたいわ！	Wow, a job where you can bring people relaxation is so wonderful! I'm a cabin attendant, and I'd personally love to ask you what kind of nails would fit my job!	n
person 1	ぜひぜひ、わたしが転職できたらお店に来てくださいね。ペットは飼われていますか？うちには熱帯魚がいるんですよ。	Of course, if I'm able to change my job please come and visit the store. Do you have a pet? I have some tropical fish.	y
person 2	熱帯魚！実はわたしには今好きな人が居るんですけど、その人も熱帯魚が好きなので、色々知りたいと思っていたところなんです！	Tropical fish! Actually there's someone I like, and they have some tropical fish, so there are a lot of things I'd like to know about them!	n
person 1	そうなんですね。恋人の方と共通の趣味があるって嬉しいことですよね。キャビンアテンダントさんだとお忙しいと思いますが、熱帯魚の世話ってそんなに難しくないのでおすすめです。	I see. It's a happy thing to share a hobby with the person you love. I'm sure you're busy as a cabin attendant, but taking care of tropical fish isn't so hard, so I recommend it.	y
person 2	よいことを聞きました！わたしの誕生日は11月22日、いい夫婦の日なんですが、自分へのプレゼントに熱帯魚を飼ってみようかしら。	That's good to hear! My birthday is November 22nd, "Good Couple Day", so maybe I should buy some tropical fish as a present to myself.	y
