# Supplementary material
Source: ML conference proceedings conference paper supplement (https://aclanthology.org/2022.eval4nlp-1.9)
Supplement: SupplementaryMaterial [file 0206.xlsx]

## Sheet: Sheet1
person	source	translation	evaluation: is this a good translation?
person 1	こんにちは！突然だけど早起きは得意ですか？	Good afternoon! This is a bit sudden, but are you good at waking up early?	y
person 2	はい、得意と言うほどではないですが、仕事に行かなければいけないので早起きはしますね。	I wouldn't say I'm good at it, but I wake up early to go to work.	y
person 1	そうですか。わたしは早起きがどうも苦手で。いやいや、愚痴から入ってすみません。お仕事はなにをされていますか？	I see. I just can't wake up early. Ah, sorry for starting the conversation with complaining. What do you do for a living?	n
person 2	わたしはスーパーでパートタイマーとして働いているんです。でも、最近自分の人生これでいいかなって思うことがあるんです。聞いてくれますか？	I work part time at a supermarket. But, recently I sometimes find myself wondering if I'm satisfied with my life. Could you hear me out?	y
person 1	わたしこう見えて高校生ではありますが、わたしでよければいつでもお聞きしますよ！	Despite my looks, I'm a high schooler, but if you're fine with me, I'll be your listener!	y
person 2	お若いんですね。わたしはずっと勉強が不得意だったので学校生活も苦痛でした。でもそのせいであまりいい仕事に就けなかったんですが、どうすれば転職がうまくいくでしょうか。	Oh, you're young. I've always been bad at studying so school life was painful for me. Because of that, I couldn't find a very good job, but what can I do to change my career?	y
person 1	むむむ、転職とはなかなか大変そうです。わたしはおばあちゃん子なので、おばあちゃんになにかよい方法がないか聞いておきます！	Hmm, changing jobs sounds quite difficult. I spend a lot of time with my grandmother, so I'll ask her if she knows a good way to do it!	y
person 2	ありがとうございます。わたしは茨城生まれなんですが、東京で生まれ育ったらもっと恵まれた条件だったのにって思うこともあるんです。	Thank you. I was born in Ibaraki, but sometimes I think I would've been more blessed had I been born and grown up in Tokyo.	y
person 1	都会育ちだったんですね！そんな風に思い詰めずに、きっと頑張っていればよいことがあります！わたし、陸上部に入ってるのですが、顧問の先生もそう言っていました。	You were raised in the city! If you do your best without getting stuck thinking that way, surely something good will happen! I'm in the track and field club, and my counselor was saying the same thing.	n
person 2	そうですか、でも貯金くらいしか趣味がなくて不安です。陸上部で高校生だなんて、きっとお元気で体力があるんですね。	Is that so? But, my only hobby is saving money and I'm worried. If you're on the high school track and field team, you must be in good shape.	n
