# Supplementary material
Source: ML conference proceedings conference paper supplement (https://aclanthology.org/2022.eval4nlp-1.9)
Supplement: SupplementaryMaterial [file 0206.xlsx]

## Sheet: Sheet1
person	source	translation	evaluation: is this a good translation?
person 1	こんにちは！突然だけど早起きは得意ですか？	Hello. Are you good at waking up early?	y
person 2	はい、得意と言うほどではないですが、仕事に行かなければいけないので早起きはしますね。	Yes, it's not as good as you say, but I have to get up early.	n
person 1	そうですか。わたしは早起きがどうも苦手で。いやいや、愚痴から入ってすみません。お仕事はなにをされていますか？	Oh, well, I'm not very good at what's going on, but I'm not angry at work, am I?	n
person 2	わたしはスーパーでパートタイマーとして働いているんです。でも、最近自分の人生これでいいかなって思うことがあるんです。聞いてくれますか？	I work in supermarket, but do you have any idea how good this is for your life?	n
person 1	わたしこう見えて高校生ではありますが、わたしでよければいつでもお聞きしますよ！	I'll always be in high school if you're listening!	n
person 2	お若いんですね。わたしはずっと勉強が不得意だったので学校生活も苦痛でした。でもそのせいであまりいい仕事に就けなかったんですが、どうすれば転職がうまくいくでしょうか。	You're young, I've been a lot better at studying, and I've always worked so hard to figure out what to do, so I didn't do that at school.	n
person 1	むむむ、転職とはなかなか大変そうです。わたしはおばあちゃん子なので、おばあちゃんになにかよい方法がないか聞いておきます！	My grandmother and I are having a hard time getting a job, so I'll ask Grandma what a good way to do!	n
person 2	ありがとうございます。わたしは茨城生まれなんですが、東京で生まれ育ったらもっと恵まれた条件だったのにって思うこともあるんです。	Thank you. I was born in Tokyo more than I was promised.	n
person 1	都会育ちだったんですね！そんな風に思い詰めずに、きっと頑張っていればよいことがあります！わたし、陸上部に入ってるのですが、顧問の先生もそう言っていました。	I'm sure there'd have been a good time in the city, and I'm sure there'd have been a lot of good training!	n
person 2	そうですか、でも貯金くらいしか趣味がなくて不安です。陸上部で高校生だなんて、きっとお元気で体力があるんですね。	But I'm sure you've got a lot of energy in high school, and I'm sure you've got a lot of work to do.	n
