# Supplementary material
Source: ML conference proceedings conference paper supplement (https://aclanthology.org/2022.eval4nlp-1.9)
Supplement: SupplementaryMaterial [file 0207.xlsx]

## Sheet: Sheet1
person	source	translation	evaluation: is this a good translation?
person 1	お元気でしたか？	Have you been doing okay?	y
person 2	はい、何とか元気ですが、最近疲れ気味でいつも仕事に遅れる遅刻魔となっています。	Yes, I'm fine but I'm always tired recently and end up being late to work all the time.	y
person 1	そうなんですか？この際、一気にお休みとか取られた方が！	Really? You should take a big vacation sometime soon!	y
person 2	そうですよね、休みを取って趣味のネットサーフィンをやりたいものです。あなたは最近どうですか？	You're right, I'd like to take a vacation and enjoy my hobby of surfing the web. How are you these days?	y
person 1	ええ、わたしもパリコレの時なんかは寝れないくらい忙しいけど普段は暇ですよ。	Ah, I was so busy around the time of the Paris Fashion Week that I couldn't sleep, but things are usually slow.	n
person 2	パリコレ関連の仕事をされているんですか？かっこいいですね！わたしは単なるドラッグストアの店員ですよ。	Your work is connected to the Paris Fashion Week? That's cool! I'm just a normal drugstore employee.	y
person 1	いえいえ、アルバイトのアシスタントですよ。ファッションデザイナーになるのが夢で。ドラッグストアなんていろんな知識が必要だし私混乱しちゃいそう！	I'm just a part-time assistant. My dream is to become a fashion designer. You need to know so many things when working at a drugstore and I feel like I'll get confused!	n
person 2	栃木の田舎にある実家近くで働いているので、それほど忙しくなく、のんびり仕事しています。お忙しそうですが、休みの日は何をされているんですか？	I work close to my family home in the countryside of Tochigi, so it's not so busy and I relax at work. You sound busy, what do you do on your days off?	n
person 1	休みの日はコンビニでアルバイトです。あ、こっちが本業になるのか？	I work at a convenience store on my days off. Ah, maybe that's my main job?	y
person 2	毎日お忙しそうですね、わたしは今ルームシェアをしているので、休みの日はルームメイトと楽しく過ごしていますよ。	You sound like you're busy every day. I'm doing a room share, so on my days off I have fun with my roommate.	y
person 1	いいですねえ。人と話すってストレス解消ですよね。わたしの解消法はマンガのおじさまと猫を読んでほくそ笑むことです。	That's nice. Talking with someone is a good way to relieve stress. My way to relieve stress is reading the manga A Man and His Cat and chuckling to myself.	y
person 2	何かしらストレス発散法があるのは良いことですね。	It's good to have some way to relieve stress isn't it.	y
