# Supplementary material
Source: ML conference proceedings conference paper supplement (https://aclanthology.org/2022.eval4nlp-1.9)
Supplement: SupplementaryMaterial [file 0207.xlsx]

## Sheet: Sheet1
person	source	translation	evaluation: is this a good translation?
person 1	お元気でしたか？	How are you?	y
person 2	はい、何とか元気ですが、最近疲れ気味でいつも仕事に遅れる遅刻魔となっています。	Yes, I'm fine, but I'm getting tired of working lately, and I'm always late for work.	n
person 1	そうなんですか？この際、一気にお休みとか取られた方が！	Is that so?	n
person 2	そうですよね、休みを取って趣味のネットサーフィンをやりたいものです。あなたは最近どうですか？	Yeah, well, I'd like to take a break and do something with my hobby server recently?	n
person 1	ええ、わたしもパリコレの時なんかは寝れないくらい忙しいけど普段は暇ですよ。	Yeah, I don't usually get a lot of time to sleep in Ricaron.	n
person 2	パリコレ関連の仕事をされているんですか？かっこいいですね！わたしは単なるドラッグストアの店員ですよ。	I'm just the coolest guy I've ever worked with!	n
person 1	いえいえ、アルバイトのアシスタントですよ。ファッションデザイナーになるのが夢で。ドラッグストアなんていろんな知識が必要だし私混乱しちゃいそう！	No, no, no, no, no, no, no, no, no, no, no, no, no, no, no, no, no, no, no, no, no, no, no, no, no, no, no, no, no, no, no, no, no, no, no, no, no, no, no, no, no, no, no, no, no, no, no, no, no, no, no, no, no, no, no, no, no, no, no, no, no, no, no, no, no, no, no, no, no, no, no, no, no, no, no, no, no, no, no, no, no, no, no, no, no, no, no, no, no, no, no, no, no, no, no, no, no, no, no, no.	n
person 2	栃木の田舎にある実家近くで働いているので、それほど忙しくなく、のんびり仕事しています。お忙しそうですが、休みの日は何をされているんですか？		n
person 1	休みの日はコンビニでアルバイトです。あ、こっちが本業になるのか？	I'm an owl at the convenience store, right?	n
person 2	毎日お忙しそうですね、わたしは今ルームシェアをしているので、休みの日はルームメイトと楽しく過ごしていますよ。	You look busy every day because I'm having a room with my roommate right now.	n
person 1	いいですねえ。人と話すってストレス解消ですよね。わたしの解消法はマンガのおじさまと猫を読んでほくそ笑むことです。	You know, you know, I'm having a lot of fun with my uncle, Manslayer, and I'm having a lot of stress with my uncle.	n
person 2	何かしらストレス発散法があるのは良いことですね。	There's a good way to worry about the situation.	n
