# Supplementary material
Source: ML conference proceedings conference paper supplement (https://aclanthology.org/2022.eval4nlp-1.9)
Supplement: SupplementaryMaterial [file 0208.xlsx]

## Sheet: Sheet1
person	source	translation	evaluation: is this a good translation?
person 1	最近はわたしは映画鑑賞が趣味で、洋画から邦画まで見るのにハマってるんですが、何か趣味はありますか？	Do I have any sense of humor in watching movies lately?	n
person 2	わあ、映画も好きですが、わたしは音楽鑑賞です。ショパンが好きですね。シュピルマンの話見ました？戦場のピアニスト？	Oh, you like watching me in the battle club, don't you?	n
person 1	戦場のピアニストは見ました、感動しますよね！音楽はクラシックを聴かれるんですね。	You've seen the music in the battle, right?	n
person 2	そうなんです。楽器メーカー勤務なので。店でピアノの弾き比べできますよ。スタンウェイからヤマハまで！	That's why I can't play the piano from Stansway in the shop!	n
person 1	へえ、すごいですね！音楽に精通してそうですね。わたしの誕生日は11月22日のいい夫婦の日なんですが、その日に夫婦揃ってクラシックコンサートに行くのも素敵かもしれません。	Well, that's a great day for my wedding anniversary!	n
person 2	え！いつも行かれるんですか？仲が良くって羨ましい！わたしは群馬の田舎で秋に生まれたんですが、夕暮れになるといつも鈴虫が鳴いていて。その影響ですかね。音楽好きは！	Are you always coming?	n
person 1	秋の自然の音はすごく風流な感じがしますね。田舎だとより音に対して敏感になりそうな気がします。	It feels like the sound of nature in the fall seems more sensitive than the sound of a country.	n
person 2	はい、静かなコンサートホールでヴァイオリンのように鈴虫が鳴く感じですね。	Yes, you sound like a quiet minefield in the quiet hall.	n
person 1	素敵ですね！自然の静かな音も格別ですが、わたしはキャビンアテンダントをしていて、喧騒を離れた田舎の晴れている日が好きなんですが、たまに田舎に行くとすがすがしい気持ちにいつもさせられます。	It's a nice and quiet sound, but I've been out of the country all day!	n
person 2	スッチーさんなんですね！カッコいい！じゃあ是非パリのサルプレイエルに行ってみて下さい！	Well, I always like to go to Paris with Mr. Salinger's cool days.	n
