# Supplementary material
Source: ML conference proceedings conference paper supplement (https://aclanthology.org/2022.eval4nlp-1.9)
Supplement: SupplementaryMaterial [file 0208.xlsx]

## Sheet: Sheet1
person	source	translation	evaluation: is this a good translation?
person 1	最近はわたしは映画鑑賞が趣味で、洋画から邦画まで見るのにハマってるんですが、何か趣味はありますか？	Recently my hobby is watching movies, and I'm into everything from Western to Japanese films. Do you have a hobby?	y
person 2	わあ、映画も好きですが、わたしは音楽鑑賞です。ショパンが好きですね。シュピルマンの話見ました？戦場のピアニスト？	Wow, I like movies too, but my hobby is listening to music. I like Chopin. Did you see the movie about Spilman? The Pianist?	y
person 1	戦場のピアニストは見ました、感動しますよね！音楽はクラシックを聴かれるんですね。	I saw The Pianist, it's so touching! You listen to classical music, then?	y
person 2	そうなんです。楽器メーカー勤務なので。店でピアノの弾き比べできますよ。スタンウェイからヤマハまで！	Yes. I work for a music instrument maker. At our store you can play and compare pianos. We have everything from Steinway to Yamaha!	y
person 1	へえ、すごいですね！音楽に精通してそうですね。わたしの誕生日は11月22日のいい夫婦の日なんですが、その日に夫婦揃ってクラシックコンサートに行くのも素敵かもしれません。	Wow, that's amazing! You seem to know a lot about music. My birthday is on November 22, "Good Couple Day", so it might be a lovely idea to go to a classical concert together as a couple on that day.	y
person 2	え！いつも行かれるんですか？仲が良くって羨ましい！わたしは群馬の田舎で秋に生まれたんですが、夕暮れになるといつも鈴虫が鳴いていて。その影響ですかね。音楽好きは！	Oh! Do you go often? I wish I had a relationship as good as yours! I was born in the fall in the Gunma countryside, and at night bell crickets were always chirping. Maybe that's why I like music!	y
person 1	秋の自然の音はすごく風流な感じがしますね。田舎だとより音に対して敏感になりそうな気がします。	The sound of nature in autumn feels so artistic. I feel like living in the country would make you even more sensitive to sounds.	y
person 2	はい、静かなコンサートホールでヴァイオリンのように鈴虫が鳴く感じですね。	Yes, it feels like the bell crickets chirp like a violin in a quiet concert hall.	y
person 1	素敵ですね！自然の静かな音も格別ですが、わたしはキャビンアテンダントをしていて、喧騒を離れた田舎の晴れている日が好きなんですが、たまに田舎に行くとすがすがしい気持ちにいつもさせられます。	That's beautiful! The quiet sounds of nature are really something special. I'm a cabin attendant, and I like the clear days in the countryside away from all the noise. When I sometimes go to the countryside it always makes me feel refreshed.	y
person 2	スッチーさんなんですね！カッコいい！じゃあ是非パリのサルプレイエルに行ってみて下さい！	Oh, you're a stewardess! That's cool! You should definitely go to see the Salle Pleyel in Paris!	y
