# Supplementary material
Source: ML conference proceedings conference paper supplement (https://aclanthology.org/2022.eval4nlp-1.9)
Supplement: SupplementaryMaterial [file 0209.xlsx]

## Sheet: Sheet1
person	source	translation	evaluation: is this a good translation?
person 1	こんにちは！お変わりありませんか？	Hello, how's it going?	y
person 2	変わりはありませんが方向音痴のせいでまた道を間違えて遅刻してしまいました。	It's not going to change, but it's not going to change, because I'm late again.	n
person 1	あらあら、それは大変でしたね。わたしも方向音痴が悩みですよ。昔から勉強が不得意で、地理なんて本当に苦手で！	Oh, that was hard to read, but I'm not really good at learning, so I'm really good at learning.	n
person 2	わかります！わたしも地図が読めないので地理は苦手でした。	I can't read the map, so I didn't like the terrain.	n
person 1	お仲間ですね！でも生まれの茨城の地理だけはちょっと詳しいですよ！あなたは得意なこととか、なにかありますか？	But you're just a friend of mine, aren't you?	n
person 2	茨城ご出身だったんですね！わたしは埼玉の出身で今東京に住んでるんですよ。わたしが得意なことといえば、夏生まれなので暑さに強いというくらいですかね。	No, I'm pretty good at living in Tokyo right now!	n
person 1	ここ数年、本当に暑くなりましたし暑さに強いのは羨ましいですね！わたしスーパーで働いてるんですけど、暑い日の通勤が億劫でたまりません！	It's really hot here for the past few years, but I'm not sure how hot it is to work in the supermarket!	n
person 2	暑い日の通勤は大変ですよね。わたしは暑さよりも雷が苦手なので雨の日がとても億劫です。	I'm much worse than the heat in the day.	n
person 1	雷も最近激しいですものね。雨の日もちょっとさぼりたくなりますけど、パートタイマーなのでそういう訳にもいかないじゃないですか。お天気の日が一番いいですよね。	It's been a rough day lately, but I don't want to be left behind for a little bit longer than that.	n
person 2	おっしゃる通りですね。明日は晴れみたいですよ。	Sounds like the best day tomorrow.	n
