# Supplementary material
Source: ML conference proceedings conference paper supplement (https://aclanthology.org/2022.eval4nlp-1.9)
Supplement: SupplementaryMaterial [file 0209.xlsx]

## Sheet: Sheet1
person	source	translation	evaluation: is this a good translation?
person 1	こんにちは！お変わりありませんか？	Hey! Anything new?	y
person 2	変わりはありませんが方向音痴のせいでまた道を間違えて遅刻してしまいました。	Nothing new, but because I'm so bad with directions I took the wrong street and was late again.	y
person 1	あらあら、それは大変でしたね。わたしも方向音痴が悩みですよ。昔から勉強が不得意で、地理なんて本当に苦手で！	Oh no, that's tough. I'm also troubled by being bad with directions. I've always been bad at studying, and I'm just awful with geography!	y
person 2	わかります！わたしも地図が読めないので地理は苦手でした。	I know how you feel! I also can't read a map so I was bad at geography.	y
person 1	お仲間ですね！でも生まれの茨城の地理だけはちょっと詳しいですよ！あなたは得意なこととか、なにかありますか？	We're buddies! But I know a bit about the geography of where I was born, Ibaraki! Is there anything that you're good at?	y
person 2	茨城ご出身だったんですね！わたしは埼玉の出身で今東京に住んでるんですよ。わたしが得意なことといえば、夏生まれなので暑さに強いというくらいですかね。	Oh, you're from Ibaraki! I'm from Saitama and now I live in Tokyo. I was born in the summer so I guess something I'm good at is handling the heat.	y
person 1	ここ数年、本当に暑くなりましたし暑さに強いのは羨ましいですね！わたしスーパーで働いてるんですけど、暑い日の通勤が億劫でたまりません！	It has gotten so hot these past few years, so I envy that you can handle the heat! I work at a supermarket, and commuting on hot days is such a pain I can hardly bear it!	y
person 2	暑い日の通勤は大変ですよね。わたしは暑さよりも雷が苦手なので雨の日がとても億劫です。	Commuting on hot days is tough. More so than heat, I'm not fond of thunder, so rainy days are a pain for me.	y
person 1	雷も最近激しいですものね。雨の日もちょっとさぼりたくなりますけど、パートタイマーなのでそういう訳にもいかないじゃないですか。お天気の日が一番いいですよね。	The thunder is really wild recently. I want to skip work a bit on stormy days, too, but I'm a part timer so I can't really do that. Days with nice weather are the best.	n
person 2	おっしゃる通りですね。明日は晴れみたいですよ。	Exactly. It seems that tomorrow will be sunny.	y
