# Supplementary material
Source: ML conference proceedings conference paper supplement (https://aclanthology.org/2022.eval4nlp-1.9)
Supplement: SupplementaryMaterial [file 0210.xlsx]

## Sheet: Sheet1
person	source	translation	evaluation: is this a good translation?
person 1	お待たせしました！遅刻してしまってごめんなさい！	Sorry to keep you waiting! I'm sorry I'm late!	y
person 2	いえいえ、大丈夫ですよ！お気になさらずに。	Oh, it's okay! Don't worry about it.	y
person 1	わたしの遅刻魔を許してくれるのはあなただけです。ありがとう。	You're the only one who forgives my habit of being late. Thanks.	y
person 2	うふふ、じつはわたしも遅刻魔なんですよ。千葉の学校に通っているんですが、いつも遅刻で先生に怒られてばっかりなので、お気持ちわかります！	Haha, I'm actually always late too. I go to school in Chiba, and my teacher is always angry about me being late, so I know how you feel!	y
person 1	千葉まで通ってらっしゃるんですね！？わたしは実家が栃木なので上京して近くに住んでるはずなのについ遅れてしまうんですよね。	You go to school in Chiba?! My family home is in Tochigi so I moved to Tokyo and live close by but I end up being late.	y
person 2	遅刻魔とは、そういう生き物なんですよ！わたし看護師になりたくて学校に通っているんですが、実はすごく苦手なことがあって…。	People who are always late are just that way! I'm going to a school to become a nurse, but there's actually something I really can't handle.	y
person 1	看護師とは素晴らしい夢ですね！苦手なこととは？	Becoming a nurse is a fantastic dream! What is it you can't handle?	y
person 2	注射がとても苦手なんです！おかしいですよね。あなたにも苦手な事とかってありますか？	I'm terrified of needles! It's strange isn't it. Is there anything you're not good with?	y
person 1	注射が苦手な看護師さんだったら注射嫌いの人たちの気持ちをわかってくれるので嬉しいですけどね。苦手というかわたしはルームシェアをしているのですがよくルームメイトが女子を部屋に招いているのが嫌なんですよね	If you're a nurse who is afraid of needles, you can understand the feeling of people who dislike them so I think they'd be happy. It's not something I'm bad at, but my roommate always brings girls back to the room and I hate it.	n
person 2	そう言ってもらえるとすごく勇気が湧きます！ありがとうございます！それにしても、そのルームシェアしている方は、女子と騒いだりするんですか？	Hearing that makes me feel very brave! thank you! So, does your roommate make a lot of noise with those girls?	n
