# Supplementary material
Source: ML conference proceedings conference paper supplement (https://aclanthology.org/2022.eval4nlp-1.9)
Supplement: SupplementaryMaterial [file 0210.xlsx]

## Sheet: Sheet1
person	source	translation	evaluation: is this a good translation?
person 1	お待たせしました！遅刻してしまってごめんなさい！	Sorry I'm late!	y
person 2	いえいえ、大丈夫ですよ！お気になさらずに。	No, it's all right!	n
person 1	わたしの遅刻魔を許してくれるのはあなただけです。ありがとう。	You're the only one who can forgive my late charm.	n
person 2	うふふ、じつはわたしも遅刻魔なんですよ。千葉の学校に通っているんですが、いつも遅刻で先生に怒られてばっかりなので、お気持ちわかります！	I'm too late to go to Chiba school too, but you're always pissed off at me!	n
person 1	千葉まで通ってらっしゃるんですね！？わたしは実家が栃木なので上京して近くに住んでるはずなのについ遅れてしまうんですよね。	You know how late I am to live in a tree, right?	n
person 2	遅刻魔とは、そういう生き物なんですよ！わたし看護師になりたくて学校に通っているんですが、実はすごく苦手なことがあって…。	I want to be a nurse, actually, but I'm not good at being a nurse.	n
person 1	看護師とは素晴らしい夢ですね！苦手なこととは？	I don't like being a nurse, do I?	n
person 2	注射がとても苦手なんです！おかしいですよね。あなたにも苦手な事とかってありますか？	You don't like needles too much, do you?	n
person 1	注射が苦手な看護師さんだったら注射嫌いの人たちの気持ちをわかってくれるので嬉しいですけどね。苦手というかわたしはルームシェアをしているのですがよくルームメイトが女子を部屋に招いているのが嫌なんですよね	I'm glad you don't like injections, but if you were a nurse, I'd like to know that I don't like injections!	n
person 2	そう言ってもらえるとすごく勇気が湧きます！ありがとうございます！それにしても、そのルームシェアしている方は、女子と騒いだりするんですか？	But I'm very brave to invite that girl into the room.	n
