# Supplementary material
Source: ML conference proceedings conference paper supplement (https://aclanthology.org/2022.eval4nlp-1.9)
Supplement: SupplementaryMaterial [file 0211.xlsx]

## Sheet: Sheet1
person	source	translation	evaluation: is this a good translation?
person 1	こんにちは、わたし秋生まれなのですがあなたはどのシーズンに生まれましたか？	Hello, I was born in autumn. Which season were you born in?	y
person 2	わたしも同じです！生まれた場所は横浜なんですが、あなたのご出身は？	Me too! I was born in Yokohama, where are you from?	y
person 1	シンパシーを感じますね。わたしは群馬です。この間も群馬の実家に帰ったところなんです。	I feel a connection. I'm from Gunma. I just recently visited my family home in Gunma.	n
person 2	群馬ですか！いいですね！ちなみに今はどんなお仕事をされてるんですか？	Gunma? How nice! By the way, what do you do?	y
person 1	のどかで良いところですよ。わたしは楽器メーカーに勤務しているんです。趣味の音楽鑑賞が仕事に活かすことができました。あなたは？	It's a nice, peaceful place. I work at a music instrument making company. I was able to apply my hobby to my work. And you?	n
person 2	趣味が仕事に繋がるなんて素敵！わたしは救急救命士をしています。結構重労働なのですっかり筋肉質になってしまいました。	How nice that your hobby connects to your work! I work as a paramedic. It's pretty hard work, so I totally put on muscle.	n
person 1	毎日ご苦労さまです！お体労わってくださいね。	Thanks for your daily hard work! Please take care of yourself.	n
person 2	ありがとうございます！最近忙しくて恋人を作る暇もなくて。。今絶賛彼女募集中です。	Thank you! Recently I'm so busy I don't have any time to find a partner... I'm seriously looking for a girlfriend now.	y
person 1	わかります、忙しいと出会う暇もないですもんね。	I understand, there's no time to meet someone when you're busy.	y
person 2	そんなんですよ。あなたはご結婚はされてますか？	That's how it is. Are you married?	y
person 1	実はわたしも絶賛婚活中なんですよ。でもなかなか実らなさそう。	Actually I'm in the middle of looking for a partner. But it doesn't seem fruitful.	n
person 2	そうなんですね。お互いいい相手に巡り会えるといいんですね！	I see. I hope that we can both find a good partner!	y
