# Supplementary material
Source: ML conference proceedings conference paper supplement (https://aclanthology.org/2022.eval4nlp-1.9)
Supplement: SupplementaryMaterial [file 0211.xlsx]

## Sheet: Sheet1
person	source	translation	evaluation: is this a good translation?
person 1	こんにちは、わたし秋生まれなのですがあなたはどのシーズンに生まれましたか？	Hi, I'm born in autumn. Where did you come from?	n
person 2	わたしも同じです！生まれた場所は横浜なんですが、あなたのご出身は？	I'm from the same beach where I grew up. Where are you from?	n
person 1	シンパシーを感じますね。わたしは群馬です。この間も群馬の実家に帰ったところなんです。	I feel Sissy, but I went back to the horse's house the other day.	n
person 2	群馬ですか！いいですね！ちなみに今はどんなお仕事をされてるんですか？	What kind of business are you working for now?	n
person 1	のどかで良いところですよ。わたしは楽器メーカーに勤務しているんです。趣味の音楽鑑賞が仕事に活かすことができました。あなたは？	It's good to have me working for a instruments maker.	n
person 2	趣味が仕事に繋がるなんて素敵！わたしは救急救命士をしています。結構重労働なのですっかり筋肉質になってしまいました。	I've got a great deal of work to do because I've got a good job to do!	n
person 1	毎日ご苦労さまです！お体労わってくださいね。	Thank you for your help every day.	n
person 2	ありがとうございます！最近忙しくて恋人を作る暇もなくて。。今絶賛彼女募集中です。	Thank you very much. She's on her way to the meeting now.	n
person 1	わかります、忙しいと出会う暇もないですもんね。	I know. We don't have time to see her.	n
person 2	そんなんですよ。あなたはご結婚はされてますか？	Are you married?	n
person 1	実はわたしも絶賛婚活中なんですよ。でもなかなか実らなさそう。	Actually, I'm getting married, too, but it looks pretty good.	n
person 2	そうなんですね。お互いいい相手に巡り会えるといいんですね！	Yeah, well, we'll see each other good!	n
