# Supplementary material
Source: ML conference proceedings conference paper supplement (https://aclanthology.org/2022.eval4nlp-1.9)
Supplement: SupplementaryMaterial [file 0212.xlsx]

## Sheet: Sheet1
person	source	translation	evaluation: is this a good translation?
person 1	こんにちは！毎日暑いですね！夏って、昔からこんなに暑かったでしたっけ？	Hello, it's hot every day, right?	n
person 2	ここまで昔は暑くなかったと思いますよ！ここ富山は涼しそうなイメージだったのに、いざ嫁いで来てみると暑くて大変です！	I don't think it was hot in here before, but I think this mountain was so hot and hot and hot!	n
person 1	えー、富山の方もそうなんですか。わたしは、いまは東京住まいなんですけど、こっちはゲリラ豪雨もすごいんですよ。わたしは雷が苦手なのでほんと辛い。	I don't really like to live in Tokyo anymore, but it's so hard to live in the mountains.	n
person 2	近年、豪雨や雷が酷いですもんね。早く夏が終わらないかな！？誕生日がひな祭りの日なので、暑いのが苦手なんです。	It's so near rain and lightning that the sun won't end quickly.	n
person 1	ああ、早生まれなんですね。わたしなんて、夏生まれなのに、暑いのが苦手ですよ。	Oh, I'm not very good at living in the hot.	n
person 2	確かに、「暑いの得意！」って人をあまり見たことがないですね。ところで、お仕事とかってされてるんですか？	You're sure you don't have a lot of work to do, by the way?	n
person 1	仕事は東京の会社に勤めてます。もともと埼玉の生まれなので、東京のそばから離れたことがないんですよ。あなたは、お仕事は？	I work for the last time in Tokyo, so you've never been away from Tokyo, have you?	n
person 2	私は助産師をしているんです。ただ、近年産婦人科が減っていることもあって、一つの病院の負担が大きいんです。忙しくって、大変です。	I'm just a couple of years old, but I've got one of the major patients in the hospital!	n
person 1	大変なお仕事をされてるんですね。でも、とっても意義があるお仕事で尊敬します！もう富山に嫁がれて長いんですか？	You've been working very hard, but you've been married to a million years, haven't you?	n
person 2	いえ、まだ数年位しか経ってないです。やっと土地柄とかに色々慣れてきた感じです。	No, it's been a long time since I've been in the land.	n
