# Supplementary material
Source: ML conference proceedings conference paper supplement (https://aclanthology.org/2022.eval4nlp-1.9)
Supplement: SupplementaryMaterial [file 0212.xlsx]

## Sheet: Sheet1
person	source	translation	evaluation: is this a good translation?
person 1	こんにちは！毎日暑いですね！夏って、昔からこんなに暑かったでしたっけ？	Good afternoon! It's so hot these days! Has summer always been this hot?	y
person 2	ここまで昔は暑くなかったと思いますよ！ここ富山は涼しそうなイメージだったのに、いざ嫁いで来てみると暑くて大変です！	I don't think it was this hot back in the day! Toyama had an image of being cool, but once I got married and came here, it's so hot!	n
person 1	えー、富山の方もそうなんですか。わたしは、いまは東京住まいなんですけど、こっちはゲリラ豪雨もすごいんですよ。わたしは雷が苦手なのでほんと辛い。	Wow, so it's the same in Toyama? I live in Tokyo, and the sudden downpours here are also crazy. It's really tough because I'm afraid of thunder.	y
person 2	近年、豪雨や雷が酷いですもんね。早く夏が終わらないかな！？誕生日がひな祭りの日なので、暑いのが苦手なんです。	These past few years the torrential rain and thunder have been awful. I wish summer would end quickly! My birthday is on Doll's Day so I can't take the heat.	n
person 1	ああ、早生まれなんですね。わたしなんて、夏生まれなのに、暑いのが苦手ですよ。	Ah, you were born early in the year. I was born in the summer, but I still can't stand the heat.	y
person 2	確かに、「暑いの得意！」って人をあまり見たことがないですね。ところで、お仕事とかってされてるんですか？	Yeah, I rarely see anyone say "I like the heat!" So, do you have a job or anything?	y
person 1	仕事は東京の会社に勤めてます。もともと埼玉の生まれなので、東京のそばから離れたことがないんですよ。あなたは、お仕事は？	I work at a company in Tokyo. I was originally born in Saitama, so I've never left the area around Tokyo. What do you do?	y
person 2	私は助産師をしているんです。ただ、近年産婦人科が減っていることもあって、一つの病院の負担が大きいんです。忙しくって、大変です。	I'm a midwife. However, due to the decrease in gynecological offices in recent years, the burden on each individual hospital is large. It's busy and hard.	y
person 1	大変なお仕事をされてるんですね。でも、とっても意義があるお仕事で尊敬します！もう富山に嫁がれて長いんですか？	You have a tough job. But I respect you for having such a significant job! Have you been in Toyama for a long time since you got married?	y
person 2	いえ、まだ数年位しか経ってないです。やっと土地柄とかに色々慣れてきた感じです。	No, it's only been a few years. I just sort of got used to the locality at this point.	n
