# Supplementary material
Source: ML conference proceedings conference paper supplement (https://aclanthology.org/2022.eval4nlp-1.9)
Supplement: SupplementaryMaterial [file 0213.xlsx]

## Sheet: Sheet1
person	source	translation	evaluation: is this a good translation?
person 1	今、千葉の学校に通っているんですが、少し悩みがあるんです。	I'm going to Chiba school now, but I have a bit of a problem.	n
person 2	悩みですか！わたしで良ければ、お聞きかせください。	If you don't mind, I'd like to hear it.	n
person 1	看護師さんになりたくて看護学校に通ってるんですが、注射が苦手なんです。	I want to be a nurse, but I'm not good enough to go to school.	n
person 2	あらまあ。それは大変ですね。でも、頑張ってやってるのは尊敬に値します。頼れる先輩とかはいないんですか？	Well, that's a tough thing, but you don't think you can rely on it, do you?	n
person 1	研修先の病院の看護師さんに教わってるんですが、どうにも上手くいかないんです。	I'm teaching a nurse at the medical hospital, but I can't handle it.	n
person 2	頑張ってれば、きっといつか必ず上達しますから、ファイトです！わたしなんて、銀行勤めが長いですが、断るのが苦手なので、融資申し込みの窓口業務が未だに苦手です。	If you're going to be good, you're going to get better, 'cause I'm not going to be able to argue with the bank for a long time.	n
person 1	窓口のお仕事だと、言いづらいことも言わないといけない時がありますもんね。ストレスが溜まったりしませんか？わたしは趣味のヨガで発散させていますよ。	You don't think I'm gonna be able to talk to you yet, do you?	n
person 2	ヨガは健康的でいいですね。わたしの場合は、スマホでゲームをやるぐらいでしょうか。中でも、オセロゲームはかなりやり込んでて強いですよ！	If Yoga is healthy, I'd like to play a game in Kiev.	n
person 1	そうなんですね！一度対戦させてもらいたいです。	Yes, I'd like to play a game with him once!	n
person 2	ええ、ぜひぜひ。お休みの日は、ヨガをする以外には？	Yes, I'd like to do it for the rest of the day.	n
