# Supplementary material
Source: ML conference proceedings conference paper supplement (https://aclanthology.org/2022.eval4nlp-1.9)
Supplement: SupplementaryMaterial [file 0213.xlsx]

## Sheet: Sheet1
person	source	translation	evaluation: is this a good translation?
person 1	今、千葉の学校に通っているんですが、少し悩みがあるんです。	I currently go to school in Chiba, but I have a bit of a concern.	y
person 2	悩みですか！わたしで良ければ、お聞きかせください。	A concern? If you don't mind, let me hear about it.	y
person 1	看護師さんになりたくて看護学校に通ってるんですが、注射が苦手なんです。	I'm going to a nursing school because I want to be a nurse, but I'm not good at giving shots.	y
person 2	あらまあ。それは大変ですね。でも、頑張ってやってるのは尊敬に値します。頼れる先輩とかはいないんですか？	Oh, my. That's tough. Although, you deserve respect for trying your best. You don't have any senior colleagues you can rely on?	n
person 1	研修先の病院の看護師さんに教わってるんですが、どうにも上手くいかないんです。	I'm learning from a nurse at the hospital I'm training at, but it just isn't going well.	y
person 2	頑張ってれば、きっといつか必ず上達しますから、ファイトです！わたしなんて、銀行勤めが長いですが、断るのが苦手なので、融資申し込みの窓口業務が未だに苦手です。	If you keep doing your best, you'll eventually get better! I've been working at a bank for a long time, but I'm bad at turning people down, so I'm still not good at working at the loan application window.	y
person 1	窓口のお仕事だと、言いづらいことも言わないといけない時がありますもんね。ストレスが溜まったりしませんか？わたしは趣味のヨガで発散させていますよ。	When you work at a counter, sometimes you have to say something you don't want to say. Don't you get stressed? I relieve my stress through my hobby, yoga.	y
person 2	ヨガは健康的でいいですね。わたしの場合は、スマホでゲームをやるぐらいでしょうか。中でも、オセロゲームはかなりやり込んでて強いですよ！	Nice, yoga is good for you. I guess I just really play games on my smartphone. I play a lot of Reversi in particular and so I'm good at it!	y
person 1	そうなんですね！一度対戦させてもらいたいです。	Really? I'd like to play against you some time.	y
person 2	ええ、ぜひぜひ。お休みの日は、ヨガをする以外には？	Yeah, of course. Do you do anything other than yoga on your days off?	y
