# Supplementary material
Source: ML conference proceedings conference paper supplement (https://aclanthology.org/2022.eval4nlp-1.9)
Supplement: SupplementaryMaterial [file 0214.xlsx]

## Sheet: Sheet1
person	source	translation	evaluation: is this a good translation?
person 1	あ、どうもー。あの、質問なんですけど、彼女ってどうやったらできるんですかね？	Ah, hello. I have a question, how do you get a girlfriend?	y
person 2	それを太めの体型のわたしに聞いちゃいます？？わたしも知りたいですー！	You're asking that to me, with my fat body? I'd like to know the answer, too!	n
person 1	あはは！太めじゃなくて、ぽっちゃりって言っておけば、いいんですよ。わたしは筋肉質な体型ですが、長年、彼女募集中で悲しい！	Ahaha! Just say chubby instead of fat. I have a muscular body, but I've still been looking for a girlfriend for years! It's embarrassing.	n
person 2	わたしもかなり前から募集中ですよ。筋肉質な体型なんて羨ましい！わたしは運動全般が苦手なので、子どもの頃からずーっとこの体型ですよ。	I've been looking for a long while, too. I wish I had a muscular body! I'm bad at any kind of exercise, so I've been in this shape since I was a child.	y
person 1	そうなんですか。わたしが筋肉質なのは、仕事柄ってのもあると思います。救急救命士をやってるので、身体が資本みたいな感じです。	Is that so? I think one of the reasons I'm muscular is because of my job. I work as a paramedic, so it's like my body is my asset.	y
person 2	みんなの命を守る大切なお仕事をされてるんですね。尊敬します！実は、私料理をつくるのが好きなので、特にカレーライスを作るのが得意なんです。職場でもカレーって食べられるんですか?	That's an important job for protecting the lives of people. I respect you! Actually, I like cooking, and I'm especially good at making curry and rice. Can you eat curry at your workplace?	n
person 1	職場にレンジがあれば、全然オッケーだと思います。カレーは甘口派ですか？わたしは甘いのが苦手なので、激辛派です！	If there's a microwave, I think it's totally fine. Are you a mild curry person? I don't really mild ones, so I'm a super spicy person!	n
person 2	おお、凄い！わたしは中辛までしか食べられないです。激辛店とかチャレンジされるんですか？	Wow! I can only manage up to medium-spicy. Do you ever take on any super spicy challenges at restaurants?	y
person 1	チャレンジしちゃいますねー。わたしの生まれた横浜は、ラーメンで有名ですが、カレーだって色々なお店があるんです。今度、紹介しましょうか？	Yeah, I do. Yokohama, where I was born, is famous for its ramen, but there are a lot of curry shops too. How about I introduce you to some?	y
person 2	あ、教えてほしいです！わたしのカレー作りの参考になるので！	Yeah, I'd like you to introduce them! It would be a good reference for when I make curry!	n
