# Supplementary material
Source: ML conference proceedings conference paper supplement (https://aclanthology.org/2022.eval4nlp-1.9)
Supplement: SupplementaryMaterial [file 0214.xlsx]

## Sheet: Sheet1
person	source	translation	evaluation: is this a good translation?
person 1	あ、どうもー。あの、質問なんですけど、彼女ってどうやったらできるんですかね？	Well, thank you for asking, but how can she do that?	n
person 2	それを太めの体型のわたしに聞いちゃいます？？わたしも知りたいですー！	Do you have any idea what I'm talking about?	n
person 1	あはは！太めじゃなくて、ぽっちゃりって言っておけば、いいんですよ。わたしは筋肉質な体型ですが、長年、彼女募集中で悲しい！	Well, if you don't get fat, tell her I'm tired, and she's been a pain in the ass for years!	n
person 2	わたしもかなり前から募集中ですよ。筋肉質な体型なんて羨ましい！わたしは運動全般が苦手なので、子どもの頃からずーっとこの体型ですよ。	I've been a part of a lot of work since I've been a kid and I've been starving for years.	n
person 1	そうなんですか。わたしが筋肉質なのは、仕事柄ってのもあると思います。救急救命士をやってるので、身体が資本みたいな感じです。	Well, I think I've got a job with the paramedic who thinks I have a job to do.	n
person 2	みんなの命を守る大切なお仕事をされてるんですね。尊敬します！実は、私料理をつくるのが好きなので、特にカレーライスを作るのが得意なんです。職場でもカレーって食べられるんですか?	I respect you so much for your life, especially if you like to make me cook rice rice!	n
person 1	職場にレンジがあれば、全然オッケーだと思います。カレーは甘口派ですか？わたしは甘いのが苦手なので、激辛派です！	If there's a microwave in my office, I'm not very good at curry!	n
person 2	おお、凄い！わたしは中辛までしか食べられないです。激辛店とかチャレンジされるんですか？	Oh, my God, I'm only having a hard time eating gum shop!	n
person 1	チャレンジしちゃいますねー。わたしの生まれた横浜は、ラーメンで有名ですが、カレーだって色々なお店があるんです。今度、紹介しましょうか？	I've been born in the beach with a lot of curry, and I'd like to introduce you to me this time.	n
person 2	あ、教えてほしいです！わたしのカレー作りの参考になるので！	I'd like to introduce you to my curry again!	n
