# Supplementary material
Source: ML conference proceedings conference paper supplement (https://aclanthology.org/2022.eval4nlp-1.9)
Supplement: SupplementaryMaterial [file 0215.xlsx]

## Sheet: Sheet1
person	source	translation	evaluation: is this a good translation?
person 1	こんにちわ！趣味のカラオケに行ってスッキリしました！寒い日が続きますね。	Hey! I went to Karaoke, my hobby, and I feel refreshed! Cold days just keep coming.	n
person 2	こんにちは！本当に寒いですよねー。わたしは七夕生まれなので、寒いのは苦手です！	Hey! It really is cold. I was born on the day of the Star Festival, so I'm not good with the cold!	n
person 1	わたしはひな祭りの日が誕生日なんですが、寒いの苦手です！何枚も着込まないと温かくならない！困ったものです。	I was born on Girls' Day, and I'm bad with the cold! I can't get warm unless I wear layers upon layers of clothes! It's tough.	n
person 2	ひな祭りの日に生まれると、女の子らしく育つものでしょうか？わたしは、何だか、恋愛運が無い日に生まれたみたいで。。。	When you're born on Girls' Day, do you grow up to be more girly? It seems I was born on a day without good fortune in terms of love...	n
person 1	ひな祭りの日生まれでも、女の子らしくなるかと言うと微妙ですね。わたしは、髪も短いし服も機能重視ですし。助産師だからかな。	It's hard to say being born on Girls' Day has an effect on being girly. I have short hair and wear functional clothes because I'm a midwife.	n
person 2	助産師さんなんですか！いやあ、大変立派なお仕事ですね。生死に関わるといえば、わたしは命の終わりを迎える方々に向き合う仕事なんです。何だか分かりますか？	You're a midwife? Wow, that's an amazingly wonderful job. Speaking of life and death, I face people who are approaching the end of their lives at my job. Do you know what it is?	y
person 1	納棺師さんとか葬儀場のお仕事されてるんですか？	Are you an embalmer, or do you work at a funeral hall?	y
person 2	亡くなるより手前で、ホームヘルパーをしてるんです。勤め先に、可愛いおじいちゃんがいてね、山梨の方言で話すので、とってもキュートなんです。	I'm a home caregiver for those about to pass away. Where I work, there's a cute old man who speaks with a Yamagata dialect, and is adorable.	y
person 1	ホームヘルパーさんなんですね、大変なお仕事をされてるんですね。山梨の方言聞いてみたいです、わたしは富山の方言ばっかり聞いてるので。	I see, you have a difficult job. I'd like to hear Yamagata dialect, as I'm always listening to Toyama dialect.	n
person 2	富山にも方言があるんですね！わたしも聞いてみたい。今度、将棋でもさしながら、ゆっくりお話してみたいな。	There's a dialect in Toyama too? I'd like to hear it. I'd love to chat with you over a game of Shogi or something some time.	y
