# Supplementary material
Source: ML conference proceedings conference paper supplement (https://aclanthology.org/2022.eval4nlp-1.9)
Supplement: SupplementaryMaterial [file 0215.xlsx]

## Sheet: Sheet1
person	source	translation	evaluation: is this a good translation?
person 1	こんにちわ！趣味のカラオケに行ってスッキリしました！寒い日が続きますね。	Hello, I'm so glad to go to Karabanoglu's.	n
person 2	こんにちは！本当に寒いですよねー。わたしは七夕生まれなので、寒いのは苦手です！	Hello, I'm really not cold, because I'm not cold!	n
person 1	わたしはひな祭りの日が誕生日なんですが、寒いの苦手です！何枚も着込まないと温かくならない！困ったものです。	I'm so cold when the festival is born, there's nothing wrong with it!	n
person 2	ひな祭りの日に生まれると、女の子らしく育つものでしょうか？わたしは、何だか、恋愛運が無い日に生まれたみたいで。。。	When I was born on the eve of the fair, I was born as a girl, and I was born as a girl, and I was born with no love.	n
person 1	ひな祭りの日生まれでも、女の子らしくなるかと言うと微妙ですね。わたしは、髪も短いし服も機能重視ですし。助産師だからかな。	In the day of the fair, I'm as small as a girl and I'm not as short as a girl.	n
person 2	助産師さんなんですか！いやあ、大変立派なお仕事ですね。生死に関わるといえば、わたしは命の終わりを迎える方々に向き合う仕事なんです。何だか分かりますか？	Well, that's a very impressive job, and I'm going to face the end of my life.	n
person 1	納棺師さんとか葬儀場のお仕事されてるんですか？	Do you know what it's like to be a cashier?	n
person 2	亡くなるより手前で、ホームヘルパーをしてるんです。勤め先に、可愛いおじいちゃんがいてね、山梨の方言で話すので、とってもキュートなんです。	You know, I'm doing a little hillbilly work before I die, so I can talk to my grandparents in the mountains.	n
person 1	ホームヘルパーさんなんですね、大変なお仕事をされてるんですね。山梨の方言聞いてみたいです、わたしは富山の方言ばっかり聞いてるので。	Mr. Harper, you're doing a great job, and I'd like to ask you a few questions about the mountains of the mountain.	n
person 2	富山にも方言があるんですね！わたしも聞いてみたい。今度、将棋でもさしながら、ゆっくりお話してみたいな。	I'd like to talk to you about it, too, but I'd like to talk to you about it later.	n
