# Supplementary material
Source: ML conference proceedings conference paper supplement (https://aclanthology.org/2022.eval4nlp-1.9)
Supplement: SupplementaryMaterial [file 0216.xlsx]

## Sheet: Sheet1
person	source	translation	evaluation: is this a good translation?
person 1	こんにちは。わたし趣味がゲームなんです。といってもアナログゲームなんですけど。特にオセロが得意なんです。あなたは趣味がありますか？	Hello. My hobby is playing games. Well, board games, I mean. I'm particularly good at Reversi. Do you have any hobbies?	y
person 2	こんにちは。わたしは新潟に住んでて、今の時期は家の周りを雪かきするのが趣味です。ちょっと特殊ですが。	Hey. I live in Niigata, and my hobby nowadays is shoveling the snow around my house. It's a bit unique.	y
person 1	実用を兼ねた趣味で素晴らしいですね！わたしは最近石川県に転勤してきたのですが、雪かきにはまだ慣れないのであなたを見習いたいです。	That's a nice and practical hobby! I recently moved to Ishikawa Prefecture for work, and I'm still not used to shoveling snow so I'd like to learn from you.	y
person 2	石川県も大変ですよね。わたしは生まれ育ったのは長野県で、そこも雪が大変でした。	Ishikawa Prefecture is tough too. I was born in Nagano Prefecture, and the snow there was tough to deal with, too.	y
person 1	わたし銀行に勤めていてよく職場の雪かきを頼まれるのですが、断ることが苦手で雪かきをおしつけられちゃうんですよ。困ったもんです。	I work at a bank and often get asked to shovel snow around the building, but I'm bad at saying no and often get forced to do it. I'm screwed.	y
person 2	わたしは薬剤師をしています。銀行の仕事で雪かきまでしないといけないのは大変ですね。	I'm working as a pharmacist. It's tough you have to shovel snow while working at a bank.	y
person 1	薬剤師さんなのですね。この時期は風邪の患者さんが多くてお仕事大変そうですね。	Oh, you're a pharmacist. I'm sure you're busy at this time of year, as there are a lot of people with colds.	y
person 2	そうなんです。この間はクリスマスイブも出勤でした。ちなみに、イブが誕生日なので、誕生日も祝ってもらえませんでした。銀行勤めはご苦労なさいませんか。	That's right. I just had to work on Christmas Eve. By the way, my birthday is on Christmas Eve, so I couldn't even celebrate it either. Isn't working at a bank tiring?	n
person 1	ついこの間ですね。お誕生日おめでとうございます。そうですね、やはり対人業務なのでトラブルがあるのが大変ですね。	That's just the other day. Happy Birthday. There are some difficulties since it involves people, which is tough.	n
person 2	お金に関することなので、特にシビアですよね。お察しします。	Since it's related to money, you have to be extra careful. You have my sympathies.	y
