# Supplementary material
Source: ML conference proceedings conference paper supplement (https://aclanthology.org/2022.eval4nlp-1.9)
Supplement: SupplementaryMaterial [file 0216.xlsx]

## Sheet: Sheet1
person	source	translation	evaluation: is this a good translation?
person 1	こんにちは。わたし趣味がゲームなんです。といってもアナログゲームなんですけど。特にオセロが得意なんです。あなたは趣味がありますか？	Hello, my hobby is a game, especially in the Anglian game.	n
person 2	こんにちは。わたしは新潟に住んでて、今の時期は家の周りを雪かきするのが趣味です。ちょっと特殊ですが。	Hello, I live in Omodaka, and now I have some kind of special hobby to perform around my house.	n
person 1	実用を兼ねた趣味で素晴らしいですね！わたしは最近石川県に転勤してきたのですが、雪かきにはまだ慣れないのであなたを見習いたいです。	I've been working in the Mount Pleasant River for a long time now, but I'm not used to getting used to a snowstorm.	n
person 2	石川県も大変ですよね。わたしは生まれ育ったのは長野県で、そこも雪が大変でした。	You know, I was born there too, and I was raised in the mountains, too.	n
person 1	わたし銀行に勤めていてよく職場の雪かきを頼まれるのですが、断ることが苦手で雪かきをおしつけられちゃうんですよ。困ったもんです。	I've been working for the bank for a long time, but I'm not going to let anything happen to you.	n
person 2	わたしは薬剤師をしています。銀行の仕事で雪かきまでしないといけないのは大変ですね。	I'm dealing with pharmacy, and it's hard to hit the bank business.	n
person 1	薬剤師さんなのですね。この時期は風邪の患者さんが多くてお仕事大変そうですね。	I know you're a medicalst, but there are a lot of patients at work this time.	n
person 2	そうなんです。この間はクリスマスイブも出勤でした。ちなみに、イブが誕生日なので、誕生日も祝ってもらえませんでした。銀行勤めはご苦労なさいませんか。	Oh, yeah, well, you didn't have to celebrate the Christmas bank for Christmas, so you can have your birthday.	n
person 1	ついこの間ですね。お誕生日おめでとうございます。そうですね、やはり対人業務なのでトラブルがあるのが大変ですね。	Well, congratulations on your birthday, but I'm afraid there's a lot of trouble in the business.	n
person 2	お金に関することなので、特にシビアですよね。お察しします。	Especially because you know about money.	n
