# Supplementary material
Source: ML conference proceedings conference paper supplement (https://aclanthology.org/2022.eval4nlp-1.9)
Supplement: SupplementaryMaterial [file 0217.xlsx]

## Sheet: Sheet1
person	source	translation	evaluation: is this a good translation?
person 1	よろしくお願いします。	Nice to meet you.	y
person 2	こんにちは、こちらこそよろしくお願いします。	Hello. Nice to meet you.	y
person 1	わたしはソーシャルワーカーなんですが、普段は何をされているのですか。	I'm a social worker, but what do you do usually do?	y
person 2	わたしは事務職に就いています。趣味はDIYをすることですよ。あなたは趣味ありますか？	I'm getting a job. Do you have any hobby to do?	n
person 1	料理が趣味ですね。カレーライスが得意です。いつも食べすぎてしまうので、今は結構太ってしまいました。	My food's always been too fat to eat rice.	n
person 2	料理がお上手とは羨ましい。わたし料理が下手なうえ岐阜に引っ越してきて間もないので、食事をどうしたものかと悩んでいたんですよ。	I'm so lucky that I didn't get to eat well while I moved into a bad mood.	n
person 1	そうなんですね。わたしも運動が苦手で、なかなか痩せられなくて悩んでいます。	Yeah, well, I'm not very good at exercise either.	n
person 2	わかります、年を重ねると中々痩せられなくなりますもんね。	I'll never get too skinny when I get older.	n
person 1	そうなんです。岐阜のどういった場所で暮らされているんですか。	Well, how are we supposed to live in a place where we're supposed to live?	n
person 2	結構な田舎なんですよ。周囲に何もなくて。あなたはどんなところに住まれてるのですか？	It's a nice country, where you live without anything else?	n
person 1	東京の田舎の方に住んでます。仕事は都心ですね。	You live in Tokyo, where you work in the city.	n
person 2	都心羨ましいです。わたし昔都会で美容師になるのが夢だったんです。	I was old enough to become a martyr in the city.	n
