# Supplementary material
Source: ML conference proceedings conference paper supplement (https://aclanthology.org/2022.eval4nlp-1.9)
Supplement: SupplementaryMaterial [file 0217.xlsx]

## Sheet: Sheet1
person	source	translation	evaluation: is this a good translation?
person 1	よろしくお願いします。	Thanks for meeting with me.	y
person 2	こんにちは、こちらこそよろしくお願いします。	Hello, the pleasure is mine.	y
person 1	わたしはソーシャルワーカーなんですが、普段は何をされているのですか。	I'm a social worker. What do you normally do?	y
person 2	わたしは事務職に就いています。趣味はDIYをすることですよ。あなたは趣味ありますか？	I do office work. My hobby is DIY. Do you have any hobbies?	n
person 1	料理が趣味ですね。カレーライスが得意です。いつも食べすぎてしまうので、今は結構太ってしまいました。	My hobby is cooking. I'm good at making curry and rice. I always overeat, so I'm a bit fat now.	n
person 2	料理がお上手とは羨ましい。わたし料理が下手なうえ岐阜に引っ越してきて間もないので、食事をどうしたものかと悩んでいたんですよ。	I wish I was good at cooking. I'm bad at cooking and I just moved to Gifu, so I'm in a pinch about deciding what to do for meals.	y
person 1	そうなんですね。わたしも運動が苦手で、なかなか痩せられなくて悩んでいます。	I see. I'm bad at exercise, so I'm worried about my inability to lose weight.	y
person 2	わかります、年を重ねると中々痩せられなくなりますもんね。	I understand, as you get older you can't lose weight so easily.	y
person 1	そうなんです。岐阜のどういった場所で暮らされているんですか。	Right. Whereabouts do you live in Gifu?	y
person 2	結構な田舎なんですよ。周囲に何もなくて。あなたはどんなところに住まれてるのですか？	I live pretty far in the countryside. What kind of place are you living in?	n
person 1	東京の田舎の方に住んでます。仕事は都心ですね。	I live in the outskirts of Tokyo. I work downtown, though.	y
person 2	都心羨ましいです。わたし昔都会で美容師になるのが夢だったんです。	I envy that you work downtown. A long time ago my dream was to become a beautician in a big city.	y
