# Supplementary material
Source: ML conference proceedings conference paper supplement (https://aclanthology.org/2022.eval4nlp-1.9)
Supplement: SupplementaryMaterial [file 0218.xlsx]

## Sheet: Sheet1
person	source	translation	evaluation: is this a good translation?
person 1	こんにちは。今日はお元気でしょうか？	Hello. How are you today?	y
person 2	なんとか元気にしています。わたしは医師をしているんですが、最近滋賀県で開業しました。	I'm doing alright. I'm a doctor and I recently opened my own practice in Shiga Prefecture.	y
person 1	滋賀県なんですか！琵琶湖が有名ですよね。わたしもホームヘルパーですので、お医者様には訪問先でお世話になることが時々あります。	Shiga Prefecture? Lake Biwa is famous. I work as a home caregiver, so I sometimes work together with doctors on location.	n
person 2	ヘルパーをされているんですね、いつもお世話になっています。お忙しいでしょうが、お休みの日は何をされているんですか？	You're a caregiver? You guys help me out often. I'm sure you're busy, but what do you do on your days off?	y
person 1	趣味は将棋なんです。下手の横好きかもしれませんが、休日には将棋クラブに通っています。	Shogi is my hobby. Although I love it, I'm quite bad at it, but I go to a Shogi club on my days off.	y
person 2	将棋は難しそうですね、わたしみたいな優柔不断の人間にはできなそうです。車の運転も下手ですし。	Shogi sounds difficult. I think it would be impossible for someone indecisive like me. I'm bad at driving too.	y
person 1	お医者様になれるくらいなら、きっと勉強を頑張ってこられたんだと思います。ですから、将棋だって簡単ですよ。あなたは何か趣味がありますか？	I think you must have studied hard enough to become a doctor. So Shogi should be easy for you, too. Do you have any hobbies?	y
person 2	わたしはゴルフだけは得意なので、長年休日には必ずゴルフをしていますね。	I'm only good at golf, so for years I've always gone golfing on my holidays.	y
person 1	ゴルフですか、意外と筋肉使うんですよね。わたしも力仕事をしているせいか、胸板が厚くなりました。	Golf? It uses a surprising amount of muscle. Perhaps because of my physical job, my chest has also gotten thick.	n
person 2	ゴルフは運動量が多いですが、後半は疲れてくるので、わたしも筋肉がほしいところです。	Golf requires a lot of exercise, and by the end I'm usually tired, so I wish I had more muscle.	y
person 1	そうなんですね。そういえば、ゴルフ場って山梨県あたりが有名ですよね。わたしも山梨県の方言が好きで調べたりしていますよ。	I see. Speaking of which, Yamagata Prefecture is famous for its golf courses. I like the Yamagata dialect, so sometimes I look up about it.	n
person 2	へえ、山梨の方にゴルフに行ったら、方言が聞けそうですね。	Oh? I'm sure you could hear the dialect if you went there to golf.	y
