# Supplementary material
Source: ML conference proceedings conference paper supplement (https://aclanthology.org/2022.eval4nlp-1.9)
Supplement: SupplementaryMaterial [file 0218.xlsx]

## Sheet: Sheet1
person	source	translation	evaluation: is this a good translation?
person 1	こんにちは。今日はお元気でしょうか？	Hello. How are you today?	y
person 2	なんとか元気にしています。わたしは医師をしているんですが、最近滋賀県で開業しました。	I'm a doctor now, but I have recently opened up my work at Kouga Yoichi.	n
person 1	滋賀県なんですか！琵琶湖が有名ですよね。わたしもホームヘルパーですので、お医者様には訪問先でお世話になることが時々あります。	I'm also a famous doctor for a visit to Nagata Lake, too.	n
person 2	ヘルパーをされているんですね、いつもお世話になっています。お忙しいでしょうが、お休みの日は何をされているんですか？	You've always taken care of harper, but what do you do for the rest of the day?	n
person 1	趣味は将棋なんです。下手の横好きかもしれませんが、休日には将棋クラブに通っています。	I don't think he likes to go to the club for holidays, do you?	n
person 2	将棋は難しそうですね、わたしみたいな優柔不断の人間にはできなそうです。車の運転も下手ですし。	It's hard to drive as people like me.	n
person 1	お医者様になれるくらいなら、きっと勉強を頑張ってこられたんだと思います。ですから、将棋だって簡単ですよ。あなたは何か趣味がありますか？	If you think you can learn to be a doctor, you'll be able to learn something so easily, right?	n
person 2	わたしはゴルフだけは得意なので、長年休日には必ずゴルフをしていますね。	I'm good at golf because I've always been good at golf for the rest of my life.	n
person 1	ゴルフですか、意外と筋肉使うんですよね。わたしも力仕事をしているせいか、胸板が厚くなりました。	A golf golf golf game or a muscle, and I've got a lot of work to do, too.	n
person 2	ゴルフは運動量が多いですが、後半は疲れてくるので、わたしも筋肉がほしいところです。	There are a lot of golf, but I want half of my muscles to get tired.	n
person 1	そうなんですね。そういえば、ゴルフ場って山梨県あたりが有名ですよね。わたしも山梨県の方言が好きで調べたりしていますよ。	Well, I like to check out some of the Valley, and I like to check out some of the country, and I like to check in.	n
person 2	へえ、山梨の方にゴルフに行ったら、方言が聞けそうですね。	Well, listen, when you go to the mountains, you can talk to the golf road.	n
