# Supplementary material
Source: ML conference proceedings conference paper supplement (https://aclanthology.org/2022.eval4nlp-1.9)
Supplement: SupplementaryMaterial [file 0219.xlsx]

## Sheet: Sheet1
person	source	translation	evaluation: is this a good translation?
person 1	こんにちは、近頃寒いですがお元気ですか？	Hello, it's been a while. How are you?	n
person 2	はい、おかげさまでとても元気ですよ！スポーツが好きで、観戦するのも自分でやるのも好きですね。最近はテニスがお気に入りです。	Well, thank you very much, very much, very much, very much, very much, very much, very much, very much, very much.	n
person 1	スポーツ好きなのですね。わたし体を動かすのがとっても苦手で。雪かきが得意って言えるくらい腕力と体力はあるんですけど。	You like sports, but I'm very good at flying my body, so strong and strong.	n
person 2	雪かきですか！寒い地域にお住まいなんですか？	Do you live in the cold zone?	n
person 1	長野で生まれ育ちましたよ。あなたはどちらにお住まいですか？	I grew up in Nagano. Where do you live?	y
person 2	わたしは都内です。マッサージ師として働いているんです。お仕事はなんですか？	I work as a massage lady. What do you do?	n
person 1	都会憧れます。わたしは薬剤師として働いていますよ。実はこの間誕生日だったんです。クリスマスイブ生まれなんですけど、恋人もいないので仕事三昧でした。	I work as a drug addict, but I was born three days ago, and I had no intention of getting a job at the wedding.	n
person 2	そうなんですか、少し似ているお仕事ですね。ご趣味は何かありますか？	Well, you look a little bit like a job, don't you?	n
person 1	今趣味を探しているところなんです。あなたの趣味は何かありますか？	What do you have on your hobby now?	n
person 2	わたしはずっとスポーツ一筋ですね。今は観戦とテニスですが、昔はバレーボール部の主将を務めるほどでした。	I've always been a sports fan, but I've been more of a joker than I ever played with.	n
person 1	テニスもバレーボールもできてすごいです。わたしもあなたを見習って運動を始めてみることにします！	And I can learn how to play tennis ball with you!	n
person 2	ええ、スポーツを通じて出会いが生まれることもありますから、ぜひ挑戦してください！	Yeah, I'm going to try and get a chance to meet you through sports, too!	n
