# Supplementary material
Source: ML conference proceedings conference paper supplement (https://aclanthology.org/2022.eval4nlp-1.9)
Supplement: SupplementaryMaterial [file 0219.xlsx]

## Sheet: Sheet1
person	source	translation	evaluation: is this a good translation?
person 1	こんにちは、近頃寒いですがお元気ですか？	Hi, it's cold recently but how are you feeling?	y
person 2	はい、おかげさまでとても元気ですよ！スポーツが好きで、観戦するのも自分でやるのも好きですね。最近はテニスがお気に入りです。	Thankfully I'm feeling great! I like to play sports, and I also like to watch games. Recently I'm into tennis.	y
person 1	スポーツ好きなのですね。わたし体を動かすのがとっても苦手で。雪かきが得意って言えるくらい腕力と体力はあるんですけど。	Oh, you like sports? I'm really bad at anything physical. I have strong arms and stamina so I can say I'm good at shoveling snow, though.	y
person 2	雪かきですか！寒い地域にお住まいなんですか？	Shoveling snow? Do you live somewhere cold?	y
person 1	長野で生まれ育ちましたよ。あなたはどちらにお住まいですか？	I was born and raised in Nagano. Where do you live?	y
person 2	わたしは都内です。マッサージ師として働いているんです。お仕事はなんですか？	I live in Tokyo. I work as a masseuse. What do you do?	y
person 1	都会憧れます。わたしは薬剤師として働いていますよ。実はこの間誕生日だったんです。クリスマスイブ生まれなんですけど、恋人もいないので仕事三昧でした。	I long for the city. I work as a pharmacist. Actually, it was my birthday just the other day. I was born on Christmas Eve, but I don't have a partner so I was absorbed in my work.	y
person 2	そうなんですか、少し似ているお仕事ですね。ご趣味は何かありますか？	I see, our work is a bit similar. What do you do for fun?	y
person 1	今趣味を探しているところなんです。あなたの趣味は何かありますか？	I'm looking for a hobby now. Do you have any?	y
person 2	わたしはずっとスポーツ一筋ですね。今は観戦とテニスですが、昔はバレーボール部の主将を務めるほどでした。	I've always been into sports. Right now I'm into watching sports and playing tennis, but I used to be the captain of the volleyball team.	y
person 1	テニスもバレーボールもできてすごいです。わたしもあなたを見習って運動を始めてみることにします！	It's amazing you can play both tennis and volleyball. I'll learn from you and try to start exercising!	y
person 2	ええ、スポーツを通じて出会いが生まれることもありますから、ぜひ挑戦してください！	You should definitely give it a shot, there are a lot of chances to meet someone through sports!	y
