# Supplementary material
Source: ML conference proceedings conference paper supplement (https://aclanthology.org/2022.eval4nlp-1.9)
Supplement: SupplementaryMaterial [file 0220.xlsx]

## Sheet: Sheet1
person	source	translation	evaluation: is this a good translation?
person 1	こんにちは、よろしくお願い致します。	Hello. Nice to meet you.	y
person 2	こんにちは、こちらこそよろしくお願い致します。わたしは獣医をしています。あなたのご職業は？	Hi, nice to meet you, sir. What do I do for a vet?	n
person 1	職業ですか？それは後でお話ししますが、わたしは岐阜に引っ越してきたばかりでまだ暮らしに慣れないんです。	It's just that I'm still getting used to living a long time.	n
person 2	慣れない環境でお疲れ様です。わたしは三重県の県庁所在地に住んでいますよ。	I live in a very heavy environment where I'm not used to it.	n
person 1	あっ、結構近くなんですね。わたし最近ようやく、事務員として働き始めたところです。慣れない環境ですががんばっています。	Well, it's nice to you. I've been working as a lawman for the last three years.	n
person 2	頑張て下さいね。わたし最近自分が閉所恐怖症であることに気づいてしまったんです。この年になっても新発見てあるものなんですね。	I've been looking for a new place I've been stuck in these years.	n
person 1	そうなんですか！エレベーターとか、現代社会では狭い場所が多いので大変ですよね。	Yeah, well, there are a lot of elevators in the year or society.	n
person 2	そうなんですよ、だから開放的な空間が好きなんです。乗馬が最近好きなんですけど、開放的で気持ちよくって最高ですよ。	Well, that's why I like to open space, but I like it very much recently.	n
person 1	乗馬ですか。いいですね。わたしは手先が器用なので、DIYが趣味なんです。本当は美容師になりたかったんですけどね。	Well, I really like to be a good man for a ride to New York, so I'm very good at it.	n
person 2	美容師になりたかったのですね。DIYができるとはすごい！どんなものを作られるのですか？	You wanted to be a pretty doctor. What's it made of?	n
person 1	本棚や椅子も自分で作っていますよ。お仕事ではないんですけど、生きがいになっていますね。	I'm making shelves and chairs, but it's not my job to live, is it?	n
person 2	生きがいがあることはよいことですよね。いつかあなたの制作物見てみたいです。	It looks like you've got a good time to learn how to live.	n
