# Supplementary material
Source: ML conference proceedings conference paper supplement (https://aclanthology.org/2022.eval4nlp-1.9)
Supplement: SupplementaryMaterial [file 0220.xlsx]

## Sheet: Sheet1
person	source	translation	evaluation: is this a good translation?
person 1	こんにちは、よろしくお願い致します。	Hello, nice to meet you.	y
person 2	こんにちは、こちらこそよろしくお願い致します。わたしは獣医をしています。あなたのご職業は？	Hi, nice to meet you too. I work as a veterinarian. What's your job?	y
person 1	職業ですか？それは後でお話ししますが、わたしは岐阜に引っ越してきたばかりでまだ暮らしに慣れないんです。	My job? I'll talk about that later, but firstly I just moved to Gifu and I'm still not used to living here.	y
person 2	慣れない環境でお疲れ様です。わたしは三重県の県庁所在地に住んでいますよ。	You must be working hard in an environment you're not accustomed with. I live in the capital of Mie Prefecture.	y
person 1	あっ、結構近くなんですね。わたし最近ようやく、事務員として働き始めたところです。慣れない環境ですががんばっています。	Oh, it's pretty close. I just recently finally started working as an office clerk. I'm not used to it yet, but I'm doing my best.	n
person 2	頑張て下さいね。わたし最近自分が閉所恐怖症であることに気づいてしまったんです。この年になっても新発見てあるものなんですね。	Hang in there. I recently realized that I'm claustrophobic. I guess you can discover something new even at my age.	y
person 1	そうなんですか！エレベーターとか、現代社会では狭い場所が多いので大変ですよね。	Really? In modern society, there are lots of cramped spaces like elevators, so that must be rough.	y
person 2	そうなんですよ、だから開放的な空間が好きなんです。乗馬が最近好きなんですけど、開放的で気持ちよくって最高ですよ。	Exactly, that's why I like open spaces. I recently got into horseback riding, and it's so freeing and feels amazingly good.	y
person 1	乗馬ですか。いいですね。わたしは手先が器用なので、DIYが趣味なんです。本当は美容師になりたかったんですけどね。	Horseback riding? That's nice. I'm good with my hands, so my hobby is DIY. I really wanted to be a beautician though.	n
person 2	美容師になりたかったのですね。DIYができるとはすごい！どんなものを作られるのですか？	You wanted to be a beautician. Being able to DIY is amazing! What kinds of things do you make?	n
person 1	本棚や椅子も自分で作っていますよ。お仕事ではないんですけど、生きがいになっていますね。	I make bookshelves and chairs by myself. It's not my job, but it's becoming one of my purposes in life.	y
person 2	生きがいがあることはよいことですよね。いつかあなたの制作物見てみたいです。	It's good having a purpose. One day I'd like to see something you made.	y
