# Supplementary material
Source: ML conference proceedings conference paper supplement (https://aclanthology.org/2022.eval4nlp-1.9)
Supplement: SupplementaryMaterial [file 0221.xlsx]

## Sheet: Sheet1
person	source	translation	evaluation: is this a good translation?
person 1	こんにちは。最近どうですか？	Hello, how's it going lately?	y
person 2	こんにちは！わたしはお茶にハマっています。よく緑茶を飲んでいますよ。	Hi, I'm having tea. I'm having some tea.	n
person 1	へー！緑茶に含まれるカテキンはコロナにも効くって研究がありますよ！医者の私が言うのもおかしいですが。	The doctor says it works in Colorado too!	n
person 2	お医者さんだったのですね！それは説得力が違います！故郷が静岡なので緑茶びいきなんですが、嬉しいですね。	You're glad you're not able to talk to the doctor!	n
person 1	まあ、医食同源と言いますから。わたしの優柔不断を治す薬はないですかね。	Well, as a doctor, can't you cure my strong medicine?	n
person 2	わたしは寒いのが苦手で、これも治す薬がなくて困ります。あなたは寒いのは平気な方ですか？	I'm not very good with cold medicine, are you, too?	n
person 1	わたしは滋賀県出身なので結構、冬は寒かったりするんです。わたしも寒いのは嫌いです。寒い時一人でいると狂いだしそうになります。	I don't like it when I'm so cold from Koga Yoichi alone in winter and I'm cold.	n
person 2	分かりますー！でもわたし、寒いのが苦手なくせに水泳が得意で、なんだか矛盾してますよね。あなたはなにか得意な事とかありますか？	- You know what I'm used to, do you?	n
person 1	いやいや。医学以外はめっきりだめで、運転なんかも下手でいっつもあおられっぱなし。	No, no, no, no, no, no, no, no, no, no, no, no, no, no, no, no, no, no, no, no, no, no, no, no, no, no, no, no, no, no, no, no, no, no, no, no, no, no, no, no, no, no, no, no, no, no, no, no, no, no, no, no, no, no, no, no, no, no, no, no, no, no, no, no, no, no, no, no, no, no, no, no, no, no, no, no, no, no, no, no, no, no, no, no, no, no, no, no, no, no, no, no, no, no, no, no, no, no, no, no.	n
person 2	運転は安全なのが一番です。あおってくるなんてひどいですね！心理カウンセラーの仕事をしているんですが、あおり運転の心理を研究して、いつかあおり運転をなくしたいですよ！		n
