# Supplementary material
Source: ML conference proceedings conference paper supplement (https://aclanthology.org/2022.eval4nlp-1.9)
Supplement: SupplementaryMaterial [file 0221.xlsx]

## Sheet: Sheet1
person	source	translation	evaluation: is this a good translation?
person 1	こんにちは。最近どうですか？	Hello. How are you these days?	y
person 2	こんにちは！わたしはお茶にハマっています。よく緑茶を飲んでいますよ。	Hello! I've really been enjoying my teas lately. I often drink green tea.	n
person 1	へー！緑茶に含まれるカテキンはコロナにも効くって研究がありますよ！医者の私が言うのもおかしいですが。	Really! There's been research that suggests catechins contained in green tea is also effective against Covid! Funny that I mention it, me being a doctor.	y
person 2	お医者さんだったのですね！それは説得力が違います！故郷が静岡なので緑茶びいきなんですが、嬉しいですね。	I didn’t know that you were a doctor! It's convincing coming from someone like you! I'm happy to hear that green tea is good for you. I love green tea so much, being from Shizuoka.	y
person 1	まあ、医食同源と言いますから。わたしの優柔不断を治す薬はないですかね。	They say 'let food be thy medicine', I wonder if there's a cure for my indecisiveness…	y
person 2	わたしは寒いのが苦手で、これも治す薬がなくて困ります。あなたは寒いのは平気な方ですか？	I am not good with cold weather, and I wonder if there's any cure for that? Are you okay with the cold?	y
person 1	わたしは滋賀県出身なので結構、冬は寒かったりするんです。わたしも寒いのは嫌いです。寒い時一人でいると狂いだしそうになります。	I'm from Shiga Prefecture, so it can be quite cold in winter. I don't like the cold, either. when I'm on my own in cold weather, it drives me crazy.	y
person 2	分かりますー！でもわたし、寒いのが苦手なくせに水泳が得意で、なんだか矛盾してますよね。あなたはなにか得意な事とかありますか？	I know what you mean! It may seem contradictory but I love swimming even though I don't like the cold. What are you are good at?	y
person 1	いやいや。医学以外はめっきりだめで、運転なんかも下手でいっつもあおられっぱなし。	Nothing really. I'm useless at anything other than medicine, and I'm horrible at driving and I get tailgated all the time.	y
person 2	運転は安全なのが一番です。あおってくるなんてひどいですね！心理カウンセラーの仕事をしているんですが、あおり運転の心理を研究して、いつかあおり運転をなくしたいですよ！	Just keep driving safely. That's awful that other drivers tailgate you! I work as a psychological counselor, and I would like to study the psychology behind road rage to help reduce such behavior someday!	y
