# Supplementary material
Source: ML conference proceedings conference paper supplement (https://aclanthology.org/2022.eval4nlp-1.9)
Supplement: SupplementaryMaterial [file 0222.xlsx]

## Sheet: Sheet1
person	source	translation	evaluation: is this a good translation?
person 1	こんにちは。最近はお元気でしたか？	Hi there. How have you been, lately?	y
person 2	ええ、おかげさまで！ アウトドアやドライブに良い季節ですものねえ、元気が出ますよ！	I've been well, thank you! It has been really nice weather for outdoor activities and driving trips, so I've been in a very good mood!	y
person 1	そうですよね！わたしも運動が好きで、最近はよくテニスをするんです。	Yes, it has been! I also like to exercise and I've been playing a lot of tennis these days.	y
person 2	それは良い趣味ですね！ お食事なんかはどうしていますか？	That's such a good hobby! What have you been eating recently?	y
person 1	食事は特にこだわりなく、店屋物やスーパーの惣菜などですね、マッサージ師の仕事が忙しいものでして。	I'm not very particular about food, I have a busy schedule working as a masseuse, I just get takeaway or ready made side dishes from the supermarket.	n
person 2	知り合いでマッサージの先生がいますが、聞いたら本当に忙しくてトイレにも立てないなんて言ってましたよ。私は人混みが苦手なんで、専ら家の裏庭でＢＢＱをすることが多いです。	A massage therapist I know tells me that it can get so busy that he doesn't have time to go to the bathroom. I am not good with crowds, so I often do BBQs in my backyard.	n
person 1	ああ、BBQもなかなか開放感があって楽しいですよね！肉もおいしいですし。でもわたしは、スポーツ観戦するほうが好きですね。	Oh, BBQ must also be fun and relaxing! BBQ meat is also delicious. But I prefer watching sports.	n
person 2	それも良いですね。冷たいモノを飲みながら応援にアツくなってるのは横から見てても楽しそうだものなあ。ご家族はどうしてました？	That's also nice. It's fun to watch people being excited, watching a game and having cold drinks. How is your family?	n
person 1	最近は実家にも帰っていませんが、たまに電話で声を聞く限りは元気でしたね。今は仕事一筋ですから、独身生活を楽しんでいます。	I haven't seen them recently, but they seemed fine when I call on the telephone every once in a while. I am focusing on my work at the moment, and enjoying being single.	n
person 2	家庭を持つと自由が利かなくなります。私も独りだから趣味であちこちドライブに出られたり出来るようなものです。	You are more restricted once you have a family. I'm also single so I enjoy my hobby and go for a drive whenever I want.	n
person 1	一人だと気楽でいいですよね！でも、家族がいたほうがいいかなとも思うんですよ。	It's nice to feel carefree being alone! But I think it may be nicer to have a family.	y
person 2	責任は産れますが、実際その通りだと思いますよ。	I think you are right, even though you will have to take more responsibility.	y
