# Supplementary material
Source: ML conference proceedings conference paper supplement (https://aclanthology.org/2022.eval4nlp-1.9)
Supplement: SupplementaryMaterial [file 0222.xlsx]

## Sheet: Sheet1
person	source	translation	evaluation: is this a good translation?
person 1	こんにちは。最近はお元気でしたか？	Hello, how are you lately?	y
person 2	ええ、おかげさまで！ アウトドアやドライブに良い季節ですものねえ、元気が出ますよ！	Well, it's a good time to drive out of the door and drive through the door!	n
person 1	そうですよね！わたしも運動が好きで、最近はよくテニスをするんです。	Yeah, I like sports too, but recently I play tennis tennis.	n
person 2	それは良い趣味ですね！ お食事なんかはどうしていますか？	That's a good taste. How's your meal?	n
person 1	食事は特にこだわりなく、店屋物やスーパーの惣菜などですね、マッサージ師の仕事が忙しいものでして。	It's not much of a food food food food food food, and a massage shop and a massage job.	n
person 2	知り合いでマッサージの先生がいますが、聞いたら本当に忙しくてトイレにも立てないなんて言ってましたよ。私は人混みが苦手なんで、専ら家の裏庭でＢＢＱをすることが多いです。	I was really busy hearing about the massage teacher, but I said, "I'm really busy with the bathroom, and I'm really busy with people!"	n
person 1	ああ、BBQもなかなか開放感があって楽しいですよね！肉もおいしいですし。でもわたしは、スポーツ観戦するほうが好きですね。	Yeah, but we like to watch a lot of meat in the backyard, too, and I like to be able to open up a great ball.	n
person 2	それも良いですね。冷たいモノを飲みながら応援にアツくなってるのは横から見てても楽しそうだものなあ。ご家族はどうしてました？	And why do you look so happy when you're sitting next to your family, huh?	n
person 1	最近は実家にも帰っていませんが、たまに電話で声を聞く限りは元気でしたね。今は仕事一筋ですから、独身生活を楽しんでいます。	You haven't been home in a while, but as long as you hear your voice, you've been hanging out on the phone all day, and now you've got a single job to do.	n
person 2	家庭を持つと自由が利かなくなります。私も独りだから趣味であちこちドライブに出られたり出来るようなものです。	If you have a family, I'll be free to drive around all the time with my hobby.	n
person 1	一人だと気楽でいいですよね！でも、家族がいたほうがいいかなとも思うんですよ。	I think you should relax, my family!	n
person 2	責任は産れますが、実際その通りだと思いますよ。	I think you're responsible for what you've done.	n
