# Supplementary material
Source: ML conference proceedings conference paper supplement (https://aclanthology.org/2022.eval4nlp-1.9)
Supplement: SupplementaryMaterial [file 0223.xlsx]

## Sheet: Sheet1
person	source	translation	evaluation: is this a good translation?
person 1	初めまして、私は三重県の県庁所在地に住んでいるのですが、どちらにお住まいですか。	How do you do? I live in the capital of Mie Prefecture. Where do you live?	y
person 2	こんにちは！三重県にお住まいなんですね。私も関西圏で大阪在住者ですよ。お仕事は何をされているんですか？	Hello! You live in Mie Prefecture. I live in Osaka, also in the Kansai area. What do you do for work?	y
person 1	獣医師です。あなたは何をされているのでしょうか。	I'm a veterinarian. What do you do?	y
person 2	獣医さんなら動物がお好きなんでしょうね。わたしは翻訳家をしていまして、趣味も読書なんです。	You must love animals if you are a veterinarian. I'm a translator and my hobby is reading books.	y
person 1	ええ、動物が好きで、趣味でよく乗馬をしています。私は足が長くて、大きな馬でも乗れるんですよ。	Yes, I do like animals and I often ride horses as a hobby. I have long legs so I am able to ride big horses.	y
person 2	乗馬なんてかっこいいですね！足が長いのも羨ましい。わたしも自慢させて頂きますと、暗記と料理が得意で、得意料理はたこ焼きです。	Horse riding, that is cool! I envy you for having long legs, too. I am proud to say, I'm good at memorizing and cooking, and my specialty is takoyaki.	n
person 1	たこやきおいしいですよね。暗記が得意なのは色々と便利そうですね。	Takoyaki is delicious, isn't it? It must be useful in various ways to be good at memorization.	n
person 2	そうですね、翻訳業の時に役に立つことが多いかもしれません。獣医師さんなら日々お忙しいんでしょうね。	Well, it may be useful for my translation work. You must be busy every day as a veterinarian.	y
person 1	それはいいですね。最近はなかなか休みが取れなくて、趣味の時間も取れていません。翻訳はお休みはどんな感じですか。	I see. I haven't had much time off recently and no time for hobbies. What is it like for the translation industry?	y
person 2	不規則なのでなかなか休みが取れませんが、自分である程度好きなように予定が組めるので、気楽にお仕事しています。	Work is irregular, so it's hard to take time off. Since I can schedule work to my preference, I can take it easy and set my time accordingly.	n
