# Supplementary material
Source: ML conference proceedings conference paper supplement (https://aclanthology.org/2022.eval4nlp-1.9)
Supplement: SupplementaryMaterial [file 0223.xlsx]

## Sheet: Sheet1
person	source	translation	evaluation: is this a good translation?
person 1	初めまして、私は三重県の県庁所在地に住んでいるのですが、どちらにお住まいですか。	It's nice to meet you, but where do I live?	n
person 2	こんにちは！三重県にお住まいなんですね。私も関西圏で大阪在住者ですよ。お仕事は何をされているんですか？	Hello, I live in 3rd grade, do you live in Uganda?	n
person 1	獣医師です。あなたは何をされているのでしょうか。	A veteran. What are you doing?	n
person 2	獣医さんなら動物がお好きなんでしょうね。わたしは翻訳家をしていまして、趣味も読書なんです。	If you're a veteran, you like animals. I read my book.	n
person 1	ええ、動物が好きで、趣味でよく乗馬をしています。私は足が長くて、大きな馬でも乗れるんですよ。	Yeah, I like animals and I can ride a big horse for a long time.	n
person 2	乗馬なんてかっこいいですね！足が長いのも羨ましい。わたしも自慢させて頂きますと、暗記と料理が得意で、得意料理はたこ焼きです。	I'm very proud to eat them, but I'm very proud to eat them too!	n
person 1	たこやきおいしいですよね。暗記が得意なのは色々と便利そうですね。	It's delicious, isn't it?	n
person 2	そうですね、翻訳業の時に役に立つことが多いかもしれません。獣医師さんなら日々お忙しいんでしょうね。	Well, there's a lot of work to do when the translation teacher might be busy.	n
person 1	それはいいですね。最近はなかなか休みが取れなくて、趣味の時間も取れていません。翻訳はお休みはどんな感じですか。	Well, that's a good idea. There's no time to translate any of your work lately.	n
person 2	不規則なのでなかなか休みが取れませんが、自分である程度好きなように予定が組めるので、気楽にお仕事しています。	Well, I don't like to work so well, so I don't get to work so well, so I don't get to work so well.	n
