# Supplementary material
Source: ML conference proceedings conference paper supplement (https://aclanthology.org/2022.eval4nlp-1.9)
Supplement: SupplementaryMaterial [file 0224.xlsx]

## Sheet: Sheet1
person	source	translation	evaluation: is this a good translation?
person 1	こんにちは、寒いのが苦手なんですが、最近かなり冷え込みますよね。調子はいかがですか？	Hello there, I'm not very good with the cold, and it's been freezing recently. How are you doing?	y
person 2	こんにちは、外に出にくいですが、じっとしてるのも苦手なので、この時期は辛いです	Hello. It is getting more difficult to go outside, but I am not good at doing nothing at home, so this is a painful time of year for me.	n
person 1	そうですよね、寒いのでよく故郷の静岡産の温かい緑茶を飲んでいます。	I agree. It's been cold, so I usually drink warm green tea from my hometown of Shizuoka.	y
person 2	いいですね。私は生まれも育ちも兵庫で、今は神戸に住んでいます。たまに商店街に行って温かい肉まんとか豚まんをたべます。	That sounds nice. I was born and raised in Hyogo, and now I live in Kobe. I sometimes go to the shopping area to eat warm meat buns and pork buns.	n
person 1	兵庫出身なんですね、あまり西日本には行ったことがないかもしれません。	You are from Hyogo, I have not been to western Japan much.	n
person 2	そうなんですね。私は旅行が好きで、西日本東日本はもちろん、海外へもよく行っています。通訳の仕事をしているので、語学の勉強のためにも行くことが多いです。	Is that so? I like to travel, so I not only do I go to western and eastern Japan but I also often go overseas. I work as an interpreter, so I regularly travel to study languages.	y
person 1	すごいですね、グローバルなお仕事をされているんですね。わたしは心理カウンセラーをしていまして、ほとんど旅をすることがありませんね。	That's amazing, you work globally. I am a mental health counselor and I rarely travel.	y
person 2	そうだったんですね。私も以前カウンセラーの方にお世話になったことがあります。	Is that right? I have been to a counselor in the past.	y
person 1	そうなんですか？海外みたく、風邪の症状のように気軽に通えるカウンセラーを目指しています。	Is that right? I aim to be a counselor who people can come to easily, like going to see a doctor for a cold, like they do overseas.	n
person 2	それは素敵ですね。私もできるだけ困っていそうな知り合いがいたら進めるようにはしています。もっと通いやすい場所になるといいですね。	That sounds wonderful. I often recommend going to a counselor if I know someone who is struggling. I hope people will find counseling more accessible.	y
person 1	そうですね、わたしは水泳が得意なんですが、そういう水泳教室のように、多くの人が集まれる場所にしたいと思っています。	I hope so, too. I'm good at swimming, so I'd like it to be a place that many people can come to, just like people coming to take swimming lessons.	n
person 2	期待してます。	I'll look forward to it.	n
