# Supplementary material
Source: ML conference proceedings conference paper supplement (https://aclanthology.org/2022.eval4nlp-1.9)
Supplement: SupplementaryMaterial [file 0224.xlsx]

## Sheet: Sheet1
person	source	translation	evaluation: is this a good translation?
person 1	こんにちは、寒いのが苦手なんですが、最近かなり冷え込みますよね。調子はいかがですか？	Hello, I'm not feeling too cold lately. How's it going?	n
person 2	こんにちは、外に出にくいですが、じっとしてるのも苦手なので、この時期は辛いです	Hello, it's hard to go outside, but I'm not sitting outside, so it's hard this time.	n
person 1	そうですよね、寒いのでよく故郷の静岡産の温かい緑茶を飲んでいます。	Yes, because I drink very cold tea in the home of Shizuoka.	n
person 2	いいですね。私は生まれも育ちも兵庫で、今は神戸に住んでいます。たまに商店街に行って温かい肉まんとか豚まんをたべます。	Well, I grew up in the armoury, and now I live in a very warm house, and I'm living in a very warm house.	n
person 1	兵庫出身なんですね、あまり西日本には行ったことがないかもしれません。	Maybe I've never been to Japan in a very long time.	n
person 2	そうなんですね。私は旅行が好きで、西日本東日本はもちろん、海外へもよく行っています。通訳の仕事をしているので、語学の勉強のためにも行くことが多いです。	Yes, I love traveling to Japan, of course, because I like to go to Japan to learn a lot of work for Japanese education.	n
person 1	すごいですね、グローバルなお仕事をされているんですね。わたしは心理カウンセラーをしていまして、ほとんど旅をすることがありませんね。	Great job, Grogan. I've been a shrink for almost a long time.	n
person 2	そうだったんですね。私も以前カウンセラーの方にお世話になったことがあります。	Well, I've had a lot of trouble with my counselor before.	n
person 1	そうなんですか？海外みたく、風邪の症状のように気軽に通えるカウンセラーを目指しています。	I'm going to go overseas, like a cold doctor, like a cold doctor.	n
person 2	それは素敵ですね。私もできるだけ困っていそうな知り合いがいたら進めるようにはしています。もっと通いやすい場所になるといいですね。	It's nice to know you too, as long as I know you as much as I do.	n
person 1	そうですね、わたしは水泳が得意なんですが、そういう水泳教室のように、多くの人が集まれる場所にしたいと思っています。	Well, I'm very good at swimming, but I'd like to meet a lot of people at that swimming class like that.	n
person 2	期待してます。	I hope so.	n
