# Supplementary material
Source: ML conference proceedings conference paper supplement (https://aclanthology.org/2022.eval4nlp-1.9)
Supplement: SupplementaryMaterial [file 0225.xlsx]

## Sheet: Sheet1
person	source	translation	evaluation: is this a good translation?
person 1	私は徳島に移住してきたんですが、お変わりありませんか。	I moved to Tahiti Island, but you're not changed?	n
person 2	四国にいらしたんですね！以前は有明湾の近くに住んでいて、わたしも四国に移り住んできましたよ。	You've used to live near the Arctic coast, and I've moved to four countries.	n
person 1	奇遇ですね。ここのところ、キャリアコンサルタントの仕事が忙しくて大変なのですが、お仕事の調子はいかがですか。	How's your career working here?	n
person 2	バリバリお仕事されているんですね。わたしは人付き合いが苦手なので、田舎で農家を今は営んで暮らしています。	You know, I'm not very good at working with people, so I'm living in a farmhouse right now.	n
person 1	私もそんな感じで、人が多いところは苦手です。せっかく田舎に移ってきたので、ドライブで自然の景色を楽しんでいます。	I've never seen such a place in my entire country, so I've never been so good at it.	n
person 2	田舎の景色をバックにドライブするのは格別ですね。わたしは古本屋が好きなんですが、ドライブがてら古本屋巡りをしています。	I like to drive back to the back of the country, but I like to drive back in the old ones.	n
person 1	そうなんですね。私はどちらかというと体を動かすのが好きで、アウトドアレジャーが趣味です。	Well, which one do I prefer to move the door with?	n
person 2	四国なら海も山も自然もいっぱいあって、アウトレジャーを存分楽しめそうです。	And I enjoy all four continents of the sea, and I enjoy it.	n
person 1	そうなんです。四国っていいところですよね。	That's right. It's a nice place for four.	n
person 2	そうですね、四国の景色を楽しみながら、懐かしさがあって本屋の匂いが感じられる、四国中の古本屋を制覇しようと思っています。	Well, I think there's an old place in the country that can smell four different countries in the old country, and I'm thinking about it.	n
