# Supplementary material
Source: ML conference proceedings conference paper supplement (https://aclanthology.org/2022.eval4nlp-1.9)
Supplement: SupplementaryMaterial [file 0225.xlsx]

## Sheet: Sheet1
person	source	translation	evaluation: is this a good translation?
person 1	私は徳島に移住してきたんですが、お変わりありませんか。	I have moved to Tokushima. How are things?	n
person 2	四国にいらしたんですね！以前は有明湾の近くに住んでいて、わたしも四国に移り住んできましたよ。	Welcome to Shikoku! I used to live near Ariake Bay, and I also moved to Shikoku.	y
person 1	奇遇ですね。ここのところ、キャリアコンサルタントの仕事が忙しくて大変なのですが、お仕事の調子はいかがですか。	What a coincidence. Recently, I am busy as a career consultant and it's been difficult. How is your job?	y
person 2	バリバリお仕事されているんですね。わたしは人付き合いが苦手なので、田舎で農家を今は営んで暮らしています。	You are working hard. I'm not good with people, so I now run a farm in the countryside.	y
person 1	私もそんな感じで、人が多いところは苦手です。せっかく田舎に移ってきたので、ドライブで自然の景色を楽しんでいます。	I'm also that way, I don't like places with a lot of people. Since I moved to the countryside, I enjoy the natural scenery on my drives.	y
person 2	田舎の景色をバックにドライブするのは格別ですね。わたしは古本屋が好きなんですが、ドライブがてら古本屋巡りをしています。	Driving on country roads and looking at the scenery is exceptional. I like secondhand bookstores, so I go driving around checking out secondhand bookstores.	y
person 1	そうなんですね。私はどちらかというと体を動かすのが好きで、アウトドアレジャーが趣味です。	That's interesting. I prefer to move my body and enjoy outdoor activities.	y
person 2	四国なら海も山も自然もいっぱいあって、アウトレジャーを存分楽しめそうです。	In Shikoku, there is so much nature with sea and mountains, you can fully enjoy the outdoors.	n
person 1	そうなんです。四国っていいところですよね。	That's right. Shikoku is a great place, isn’t it?	y
person 2	そうですね、四国の景色を楽しみながら、懐かしさがあって本屋の匂いが感じられる、四国中の古本屋を制覇しようと思っています。	Yes, while enjoying the scenery of Shikoku, and I intend to conquer all the secondhand bookstores all over Shikoku, where you can feel nostalgic and enjoy the smell of old books.	n
