# Supplementary material
Source: ML conference proceedings conference paper supplement (https://aclanthology.org/2022.eval4nlp-1.9)
Supplement: SupplementaryMaterial [file 0226.xlsx]

## Sheet: Sheet1
person	source	translation	evaluation: is this a good translation?
person 1	こんにちは！私は大阪在住で、たこ焼きを焼くのが得意なんですが、何か趣味とかありますか？	Hello! I live in Osaka and am good at making takoyaki. Do you have any hobbies?	y
person 2	たこやきおいしいですよね。私は和歌山に住んでいて、ツーリングをよくしますね。	Oh, takoyaki is delicious, isn't it? I live in Wakayama and I like to go on my motorcycle.	n
person 1	和歌山なら大阪に近いですね。ツーリングは楽しそう。わたしはたこ焼きを食べる以外には、本を読むことが趣味なんです。	Wakayama is close to Osaka. Motorcycle riding sounds fun. Other than eating takoyaki, I like reading books.	y
person 2	すごいですね。私は文字が苦手で、仕事も肉体労働をしています。本を読める人は尊敬します。	You are amazing. I am not very good with words, so I also do physical labor. I am in awe of people who can read books.	n
person 1	アクティブな方なんですね、わたしは翻訳家をしていて、あまり家から出ないので、活発な方が羨ましいです。	You must be an active person. I'm a translator and I don't get out much, so I envy people who are active.	y
person 2	そうなんですね。確かに活発で、仕事以外でも、アニメの聖地巡礼とかで色々なところを廻ったりしてます。	Is that right? I am certainly active, and outside of work, I go around various places and make pilgrimages to famous anime-related places.	y
person 1	多趣味なんですね、わたしは細かい作業や暗記など、ちまちました作業が得意なのか、活動的な人に憧れますね。	You have many hobbies. I am more a detail oriented and comfortable at memorizing things or working at mundane tasks so I envy those who are more active.	y
person 2	器用なんですね。私は活発な反面マイペースだと言われてしまうこともあります。	You must be proficient in many things. I am active but people say I work at my own pace.	n
person 1	マイペースが一番だと思いますよね。わたしがインドア派なのは実はマイペースだからかもしれません。	I think doing things at your own pace is the best. I think I'm an indoor person because that is what I'm comfortable with.	n
person 2	そうかもしれませんね。今の時期は外にも出にくいので、インドアな趣味も見つけていきたいです。	You might be right. It's hard to go outside at the moment, so I should find a hobby I can enjoy indoors.	y
