# Supplementary material
Source: ML conference proceedings conference paper supplement (https://aclanthology.org/2022.eval4nlp-1.9)
Supplement: SupplementaryMaterial [file 0226.xlsx]

## Sheet: Sheet1
person	source	translation	evaluation: is this a good translation?
person 1	こんにちは！私は大阪在住で、たこ焼きを焼くのが得意なんですが、何か趣味とかありますか？	Hello, I'm very good at cooking in Osaka, but do you have any good taste?	n
person 2	たこやきおいしいですよね。私は和歌山に住んでいて、ツーリングをよくしますね。	It's delicious. I live in the mountains, I live in the Tama mountains.	n
person 1	和歌山なら大阪に近いですね。ツーリングは楽しそう。わたしはたこ焼きを食べる以外には、本を読むことが趣味なんです。	If you're singing near the mountains, the ring seems to be very happy to read the book except I can read the book.	n
person 2	すごいですね。私は文字が苦手で、仕事も肉体労働をしています。本を読める人は尊敬します。	I don't like to read the book, but I'm not good at it.	n
person 1	アクティブな方なんですね、わたしは翻訳家をしていて、あまり家から出ないので、活発な方が羨ましいです。	I'm rather jealous of the house, so I'm not getting out of my house.	n
person 2	そうなんですね。確かに活発で、仕事以外でも、アニメの聖地巡礼とかで色々なところを廻ったりしてます。	Yeah, well, you know, instead of work, you know, you do a lot of work, but you know, you do a lot of good work on animals and pilgrims.	n
person 1	多趣味なんですね、わたしは細かい作業や暗記など、ちまちました作業が得意なのか、活動的な人に憧れますね。	You know, I do some pretty good work, and I do some pretty good work, and I do some pretty good work, and I do some good things.	n
person 2	器用なんですね。私は活発な反面マイペースだと言われてしまうこともあります。	You know, I've been told that I'm getting pretty organized sometimes.	n
person 1	マイペースが一番だと思いますよね。わたしがインドア派なのは実はマイペースだからかもしれません。	I think it's the fastest time for Mysteries, so I might be in the middle of a hurry.	n
person 2	そうかもしれませんね。今の時期は外にも出にくいので、インドアな趣味も見つけていきたいです。	Maybe it's hard to find a way out of the door right now, too.	n
