# Supplementary material
Source: ML conference proceedings conference paper supplement (https://aclanthology.org/2022.eval4nlp-1.9)
Supplement: SupplementaryMaterial [file 0227.xlsx]

## Sheet: Sheet1
person	source	translation	evaluation: is this a good translation?
person 1	こんばんは、私は通訳をしているものですが、普段は何をなされているのですか。	Good evening, I'm an interpreter. What do you usually do?	y
person 2	通訳ですか！すごいですね。わたしは目立つことが苦手で、在宅で事務の仕事をしています。	Wow, you are an interpreter! That's amazing. I don't like to stand out so I usually do administrative work from home.	y
person 1	そうなんですね。私はじっとしているのが苦手なので、なかなか在宅は難しいかもしれません。	I see. I am a restless person, so it would be difficult for me to work from home.	y
person 2	活発な人が羨ましい限りです。もともと女性にしては身長が高くて目立つもので、できるだけ目立たぬよう過ごしていたら、夢見がちと人から言われる人になってしまいました。	I envy people who are outgoing. I am quite tall for a woman, I stand out naturally but I try my best not to attract attention, so people think I'm a dreamer.	n
person 1	面白いですね。私は生まれも育ちも兵庫で、今も神戸に住んでいるので、東京とかもっと都会に住むことを夢見てます。	That's interesting. I was born and raised in Hyogo and I still live in Kobe, so I dream about living in bigger cities like Tokyo.	y
person 2	わたしも福島出身で、都会に憧れ、福島から東京に引っ越してきましたよ。	I'm from Fukushima, and I moved to Tokyo because I am also attracted to the big cities.	y
person 1	そうだったんですね。もっと言えば、海外に住んでみたいとも思います。海外旅行をよくするので。	Same as me. If possible, I would like to live overseas. I often travel abroad.	n
person 2	海外への憧れはあるものの、私にはなかなか超えられないハードルですね。国内であればよく旅行に行くんですがね。	I am also inspired to live in a foreign country, it is a big hurdle to overcome for me. I usually take domestic trips.	y
person 1	やっぱり旅行は楽しいですよね。通訳をしているので、言葉の抵抗がないのがいいのかもしれません。	Yes, traveling is so much fun. Since I'm an interpreter, I don't feel intimidated by the language.	y
person 2	まずは言語の壁をなくすことから始めなければいけませんね。国内で旅行はされるんですか？わたしは鳥取砂丘がお気に入りスポットです。	I have to start by getting over the language barrier first. Do you travel in Japan? My favorite destination is the Tottori Sand Dunes.	y
