# Supplementary material
Source: ML conference proceedings conference paper supplement (https://aclanthology.org/2022.eval4nlp-1.9)
Supplement: SupplementaryMaterial [file 0227.xlsx]

## Sheet: Sheet1
person	source	translation	evaluation: is this a good translation?
person 1	こんばんは、私は通訳をしているものですが、普段は何をなされているのですか。	Good evening, I'm interpreting something normally, but what do you usually do?	n
person 2	通訳ですか！すごいですね。わたしは目立つことが苦手で、在宅で事務の仕事をしています。	It's a great translation. I'm working at the office.	n
person 1	そうなんですね。私はじっとしているのが苦手なので、なかなか在宅は難しいかもしれません。	Yeah, well, I'm not sure I'm comfortable with the house, but it might be hard to stay.	n
person 2	活発な人が羨ましい限りです。もともと女性にしては身長が高くて目立つもので、できるだけ目立たぬよう過ごしていたら、夢見がちと人から言われる人になってしまいました。	As long as a woman's age were as tall as she was, she'd have to live in Tokyo, as long as she wanted to.	n
person 1	面白いですね。私は生まれも育ちも兵庫で、今も神戸に住んでいるので、東京とかもっと都会に住むことを夢見てます。	And now I've grown up in a more interesting city in Tokyo, and I've lived in a more interesting dream.	n
person 2	わたしも福島出身で、都会に憧れ、福島から東京に引っ越してきましたよ。	I moved to Tokyo from Fukawa to Fukawa, too.	n
person 1	そうだったんですね。もっと言えば、海外に住んでみたいとも思います。海外旅行をよくするので。	Well, if you tell me more, I'd like to live abroad, so I'd like to travel away from it.	n
person 2	海外への憧れはあるものの、私にはなかなか超えられないハードルですね。国内であればよく旅行に行くんですがね。	I'd rather go to the country than go to Hertfordshire, but I'm not going to be able to spend $10,000.	n
person 1	やっぱり旅行は楽しいですよね。通訳をしているので、言葉の抵抗がないのがいいのかもしれません。	I'm sure the trip might be a good idea, because it might be a good idea to argue with.	n
person 2	まずは言語の壁をなくすことから始めなければいけませんね。国内で旅行はされるんですか？わたしは鳥取砂丘がお気に入りスポットです。	First, I'm going to start traveling from the Wall, and I'm going to take a trip to the hills, and I love it.	n
