# Supplementary material
Source: ML conference proceedings conference paper supplement (https://aclanthology.org/2022.eval4nlp-1.9)
Supplement: SupplementaryMaterial [file 0228.xlsx]

## Sheet: Sheet1
person	source	translation	evaluation: is this a good translation?
person 1	こんにちは！わたしは農家をしていますが、あなたは何をされている方ですか？	Hello, I'm a farmhouse, sir. What are you doing?	y
person 2	フリーターをしています。サイクリングが趣味で、全国いろんなところを巡っています。	The free ring is running around the country with all the hobby of their hobby.	n
person 1	自由に旅ができて楽しそうですね。わたしは本屋の匂いを懐かしく感じるたちなので、好きな古本屋をよく訪れるのが趣味です。	It seems to be fun to travel free, which is why we love our old guests so much.	n
person 2	本の匂い、わかります。私は国内旅行をよくするのですが、大きめの本屋に立ち寄ることもありますね。	I know the smell of the book, but I can't wait for the country to come to the shop with me.	n
person 1	いつも近場の本屋にしかいけないので、日本中の本屋に行けるのは羨ましいですね。どこから出発されてるんですか？	Where can we go from where we can always be found in Japan?	n
person 2	島根在住なので、島根です。お住いはどちらなんですか。	Somewhere in Shikoku, somewhere in Japan.	n
person 1	出雲大社に行ってみたいですね！わたしは九州の有明湾の近くに住んでたんですが、最近もう少し内陸に移住したところです。	I'd like to go to the clouds, but I've been living a little closer to the Shibuya Bay for a while now.	n
person 2	そうなんですね。過ごし方は変わりましたか。	Well, that's better.	n
person 1	もともと人付き合いが苦手なので、かなり田舎に引っ越したので、自分にはあっているのかもしれません。	I've never known people so much, so maybe I've moved to a country so far away from myself.	n
person 2	都会は人が多くて疲れますもんね。	Some of the cities are getting tired of it.	n
