# Supplementary material
Source: ML conference proceedings conference paper supplement (https://aclanthology.org/2022.eval4nlp-1.9)
Supplement: SupplementaryMaterial [file 0228.xlsx]

## Sheet: Sheet1
person	source	translation	evaluation: is this a good translation?
person 1	こんにちは！わたしは農家をしていますが、あなたは何をされている方ですか？	Hello! I'm a farmer. What do you do?	y
person 2	フリーターをしています。サイクリングが趣味で、全国いろんなところを巡っています。	I'm an hourly worker. My hobby is cycling, and I ride around various locations all over the country.	n
person 1	自由に旅ができて楽しそうですね。わたしは本屋の匂いを懐かしく感じるたちなので、好きな古本屋をよく訪れるのが趣味です。	It must be fun to travel freely. My hobby is to visit secondhand bookstores because I like how the smell of those books makes me feel nostalgic.	y
person 2	本の匂い、わかります。私は国内旅行をよくするのですが、大きめの本屋に立ち寄ることもありますね。	I understand what you mean by the smell of books. I often travel domestically, and I stop in at large bookstores sometimes.	y
person 1	いつも近場の本屋にしかいけないので、日本中の本屋に行けるのは羨ましいですね。どこから出発されてるんですか？	I only go to bookstores nearby, so it must be nice to go to those all over Japan. Where do you start from?	n
person 2	島根在住なので、島根です。お住いはどちらなんですか。	I live in Shimane, so I start from there. Where do you live?	y
person 1	出雲大社に行ってみたいですね！わたしは九州の有明湾の近くに住んでたんですが、最近もう少し内陸に移住したところです。	Oh, I've always wanted to go to Izumo Taisha! I used to live near Ariake Bay in Kyushu, but recently I moved a little more inland.	y
person 2	そうなんですね。過ごし方は変わりましたか。	Is that so? Has the way you spend your time changed?	y
person 1	もともと人付き合いが苦手なので、かなり田舎に引っ越したので、自分にはあっているのかもしれません。	I've always been pretty shy, so moving deep into the countryside suits me.	y
person 2	都会は人が多くて疲れますもんね。	It can be tiring, living in a big city with a lot of people.	y
