# Supplementary material
Source: ML conference proceedings conference paper supplement (https://aclanthology.org/2022.eval4nlp-1.9)
Supplement: SupplementaryMaterial [file 0229.xlsx]

## Sheet: Sheet1
person	source	translation	evaluation: is this a good translation?
person 1	お久しぶりですねー！お元気でしたか？	It's been a while. How are you?	y
person 2	フウフウ、もうここまでお肉が付いちゃうと、歩くのが大変で、フウ	Oh, no, no, no, no, no, no, no, no, no, no, no, no, no, no.	n
person 1	あらあら。どうしちゃったんですか？	What's wrong?	n
person 2	不規則な生活の祟りじゃないかなーって。あの、お取り寄せの番組ばっかり見てて、本当に運動とさよならーって生活だったから。テレビとか良く見ます？	I thought you said you wanted to see the rules of life so you could really go to work with a sports show and say goodbye?	n
person 1	そうだったんですね。気持ちはわかりますが！テレビ見ますよー。アニメが好きでよく聖地巡礼ってやつをしてます。	You know, I like watching the TV, don't you? You know what I mean?	n
person 2	ああ、モデルになった建物とか町に行くアレですね。私も頑張って外出しようかな。	Yeah, well, I'm going out to a model or something, and I'm going out too.	n
person 1	ぜひぜひですよ！バイクで出かけたりすると爽快ですよ！	I'd love to, but I'm going out with my bike and I'm going out!	n
person 2	無理無理、私が乗れるバイクなんてない！ バイクが可愛そうだよ！ でもハーレーか何かで飛ばして来てヘルメット取ると長髪がブワサッってなるのには憧れますねえ。	No, I can't ride a bike, but I can fly a bike or something, and I can fly something with my long hair!	n
person 1	あはは、確かに憧れますねー。今度わたしのバイクの後ろにお乗せしますよ！わたしの地元和歌山を一緒に走りましょう！	I'm not going back to the local mountain next time, I'm going to sing a bike.	n
person 2	和歌山かあ、行ってみたいなあ。暖かい所なんでしょう？	Hey, you want to go to the warm place?	n
