# Supplementary material
Source: ML conference proceedings conference paper supplement (https://aclanthology.org/2022.eval4nlp-1.9)
Supplement: SupplementaryMaterial [file 0229.xlsx]

## Sheet: Sheet1
person	source	translation	evaluation: is this a good translation?
person 1	お久しぶりですねー！お元気でしたか？	It's been a while! How have you been?	y
person 2	フウフウ、もうここまでお肉が付いちゃうと、歩くのが大変で、フウ	Phew, I've gained so much weight, it's even difficult to walk. Ha.	y
person 1	あらあら。どうしちゃったんですか？	Oh no, what's happened?	y
person 2	不規則な生活の祟りじゃないかなーって。あの、お取り寄せの番組ばっかり見てて、本当に運動とさよならーって生活だったから。テレビとか良く見ます？	It's probably the consequence of my erratic lifestyle. I keep watching these shopping channels and I don't exercise. Do you watch a lot of TV?	y
person 1	そうだったんですね。気持ちはわかりますが！テレビ見ますよー。アニメが好きでよく聖地巡礼ってやつをしてます。	I see. I can sympathize! I do watch TV. I like anime, and I often make pilgrimages to sacred anime-related places.	n
person 2	ああ、モデルになった建物とか町に行くアレですね。私も頑張って外出しようかな。	Oh, I've heard about that, visiting the buildings and the towns they were modeled on. I should consider getting out.	y
person 1	ぜひぜひですよ！バイクで出かけたりすると爽快ですよ！	You should! It's refreshing to go out on a motorcycle!	y
person 2	無理無理、私が乗れるバイクなんてない！ バイクが可愛そうだよ！ でもハーレーか何かで飛ばして来てヘルメット取ると長髪がブワサッってなるのには憧れますねえ。	No way, there's no bike that I can ride! I'd feel sorry for the bike! Although, I do fantasize about riding a Harley Davidson and taking my helmet off to let my long hair out in the air.	n
person 1	あはは、確かに憧れますねー。今度わたしのバイクの後ろにお乗せしますよ！わたしの地元和歌山を一緒に走りましょう！	Ha ha, that sounds amazing. I'll take you on the back of my bike next time! Let's go around my hometown of Wakayama together!	n
person 2	和歌山かあ、行ってみたいなあ。暖かい所なんでしょう？	Wakayama, huh? I'd love to go. It's a warm place, isn't it?	y
