# Supplementary material
Source: ML conference proceedings conference paper supplement (https://aclanthology.org/2022.eval4nlp-1.9)
Supplement: SupplementaryMaterial [file 0230.xlsx]

## Sheet: Sheet1
person	source	translation	evaluation: is this a good translation?
person 1	ねえねえ、鳥取砂丘って行ったことある？	Hey, have you ever been to a birdhouse before?	n
person 2	行ったことないー！砂しかないんでしょ？わたし食べ歩きが好きだからなぁ。	You've never been there before. I like to walk.	n
person 1	砂しかないって！色気がなさすぎ！砂と空と海、これ以上に幻想的な場所ってほかにないよ！	The sand is too bright, the sand and the sand are too bright and the ocean are too fascious!	n
person 2	そっかぁ。じゃあ今度行ってみようかなぁ。	Let's go again.	n
person 1	うん！絶対オススメだから。ああ、ああいうところで運命の出会いがあったら、最高なのに！こんなことばっか言ってるから、夢見がちって友達に言われるんだけどね！	Yeah, well, if I had met someone like this, I'd say it's the best dream I've ever seen.	n
person 2	なるほどね。どういう人がタイプなの？	Well, what kind of guy is that?	n
person 1	そうだなあ。わたしが結構タッパがあるから、身長180cm以上は欲しいかな！高望みかな？	Well, I have a lot more than 180 feet, so you want more than 80 'em?	n
person 2	そうなんだ！うーん別にそんなことないんじゃない？わたしセラピストなんだけど、結構身長高い男の人も来るよ。	Well, I'm not that kind of therapist, but I'm a very tall man.	n
person 1	あー、セラピストだったのかあ。どおりで聞き上手だと思った！あなたは、そこで素敵な出会いはあった？	Oh, I thought you were a good therapist, right there!	n
person 2	うーん、一緒にごはんに行ったけど、熱いものが好きみたいで。わたし猫舌だから合わないかなーと思っちゃったなぁ。	Well, I didn't think you'd like it when you went to dinner with me, but I didn't like it.	n
