# Supplementary material
Source: ML conference proceedings conference paper supplement (https://aclanthology.org/2022.eval4nlp-1.9)
Supplement: SupplementaryMaterial [file 0230.xlsx]

## Sheet: Sheet1
person	source	translation	evaluation: is this a good translation?
person 1	ねえねえ、鳥取砂丘って行ったことある？	Hey, have you ever been to the Tottori Sand Dunes?	y
person 2	行ったことないー！砂しかないんでしょ？わたし食べ歩きが好きだからなぁ。	No, I've never been there! But there's only sand there, right? I prefer strolling and finding good food.	y
person 1	砂しかないって！色気がなさすぎ！砂と空と海、これ以上に幻想的な場所ってほかにないよ！	Like, of course there's only sand! You are so unromantic! Think about it, sand, sky and the ocean, there's no place like it!	n
person 2	そっかぁ。じゃあ今度行ってみようかなぁ。	Is that's right? Then, maybe I should go sometime.	y
person 1	うん！絶対オススメだから。ああ、ああいうところで運命の出会いがあったら、最高なのに！こんなことばっか言ってるから、夢見がちって友達に言われるんだけどね！	Yes, I highly recommend it! Oh, wouldn't it be wonderful if you meet The One in a place like that? My friends tell me that I'm too dreamy for saying things like this!	n
person 2	なるほどね。どういう人がタイプなの？	I see. What's your type?	y
person 1	そうだなあ。わたしが結構タッパがあるから、身長180cm以上は欲しいかな！高望みかな？	Umm, I am quite tall, so I'd like him to be over 180cm tall. Is that too much to ask?	y
person 2	そうなんだ！うーん別にそんなことないんじゃない？わたしセラピストなんだけど、結構身長高い男の人も来るよ。	No, I don't think so. I'm a therapist, and I see quite a lot of tall men.	y
person 1	あー、セラピストだったのかあ。どおりで聞き上手だと思った！あなたは、そこで素敵な出会いはあった？	You are a therapist, no wonder. I thought you were good listener! Have you met anyone nice at your practice?	y
person 2	うーん、一緒にごはんに行ったけど、熱いものが好きみたいで。わたし猫舌だから合わないかなーと思っちゃったなぁ。	Well, I have gone out to dinner with someone. But he seemed to like boiling hot food, and I can't take those. So I figured we were not a good match.	n
