# Supplementary material
Source: ML conference proceedings conference paper supplement (https://aclanthology.org/2022.eval4nlp-1.9)
Supplement: SupplementaryMaterial [file 0231.xlsx]

## Sheet: Sheet1
person	source	translation	evaluation: is this a good translation?
person 1	どうもこんにちは。わたしは島根県に住んでいるんですが、あなたは？	Hello there. I live in Shimane Prefecture, what about you?	y
person 2	こんにちはー。島根県っていっても、都会の方かしら？わたしはかなり田舎で、コンビニまで車で行かなきゃならない感じよ。	Hello. Do you mean you live in the urban part of Shimane Prefecture? I'm living in a pretty rural area and I need to drive to the closest convenience store.	y
person 1	わたしも田舎の方なので、そんな感じですよ。サイクリングが好きなので、自転車でコンビニに行ってます。	I also live in the countryside, so it's the same for me. I'm into cycling, so I ride my bike to the convenience store.	y
person 2	すごい！自転車で？わたしも、チャレンジしてみようかなあ。狭い車内よりも自転車が開放的で好きだし。	Wow! On your bike? Maybe I'll try that, too. I like it better that a bike is more expansive than a small car.	y
person 1	運動にもなるし、おすすめですよ。ところでご趣味とかありますか？	It's a great workout, totally recommended it. By the way, do you have any hobbies?	y
person 2	広い空の下でガーデニングをするのが、最高に気持いいと思ってるわ。広い家と広い庭が持てるって、田舎ならではよね。	It feels so nice to enjoy gardening under the sun. One of the benefits of living in the countryside is that you can own a large house and a large garden.	y
person 1	ほんと広い家と広い庭は都会じゃ厳しいですもんね。それにしてもガーデニングとは品のあるご趣味ですね。わたしは男なので、品のある女性には惹かれます。	Yes, having a large house and a large garden in the city is difficult. Gardening sounds like a classy hobby. From a male perspective, I like women with good taste.	y
person 2	あら、うれしい！でもねえ、O型だからか、掃除も洗濯もかなり適当よ。良く言えば大らか、悪くいえば大雑把ってやつね。それでもいい？	Oh, that's flattering! Well, my blood type is O, so I'm not great at cleaning or laundry. You could say I'm easygoing, but on the flip side you could say I'm rough. Would that bother you?	y
person 1	おおらかって良いことだと思いますよ。あとわたしは国内旅行が好きなので、できれば一緒に行きたいですね。	I think it's good to be easygoing. Also, I like to travel within Japan, so it would be nice if you could join me.	y
person 2	国内旅行って素敵な趣味だと思うわ。どの辺がオススメの場所なの？	I think traveling in Japan is a wonderful pastime. Where would you recommended?	y
