# Supplementary material
Source: ML conference proceedings conference paper supplement (https://aclanthology.org/2022.eval4nlp-1.9)
Supplement: SupplementaryMaterial [file 0231.xlsx]

## Sheet: Sheet1
person	source	translation	evaluation: is this a good translation?
person 1	どうもこんにちは。わたしは島根県に住んでいるんですが、あなたは？	Hello, I live in the Shibuya Islands, sir?	n
person 2	こんにちはー。島根県っていっても、都会の方かしら？わたしはかなり田舎で、コンビニまで車で行かなきゃならない感じよ。	- Hello, how do I feel about going to the supermarket?	n
person 1	わたしも田舎の方なので、そんな感じですよ。サイクリングが好きなので、自転車でコンビニに行ってます。	- I like to go to a convenience store.	n
person 2	すごい！自転車で？わたしも、チャレンジしてみようかなあ。狭い車内よりも自転車が開放的で好きだし。	I like the bike more than I do in a car.	n
person 1	運動にもなるし、おすすめですよ。ところでご趣味とかありますか？	Do you have any of your hobby?	n
person 2	広い空の下でガーデニングをするのが、最高に気持いいと思ってるわ。広い家と広い庭が持てるって、田舎ならではよね。	I think the biggest house in the sky has a great place to live, then.	n
person 1	ほんと広い家と広い庭は都会じゃ厳しいですもんね。それにしてもガーデニングとは品のあるご趣味ですね。わたしは男なので、品のある女性には惹かれます。	The big house and the big house are tough, but I have a taste for a man named Gertrude.	n
person 2	あら、うれしい！でもねえ、O型だからか、掃除も洗濯もかなり適当よ。良く言えば大らか、悪くいえば大雑把ってやつね。それでもいい？	Well, that's very nice of you to say, but it's very nice to clean up, isn't it?	n
person 1	おおらかって良いことだと思いますよ。あとわたしは国内旅行が好きなので、できれば一緒に行きたいですね。	I'd love to travel with you if I could.	n
person 2	国内旅行って素敵な趣味だと思うわ。どの辺がオススメの場所なの？	What kind of fun do you think the country is in Oslo?	n
