# Supplementary material
Source: ML conference proceedings conference paper supplement (https://aclanthology.org/2022.eval4nlp-1.9)
Supplement: SupplementaryMaterial [file 0232.xlsx]

## Sheet: Sheet1
person	source	translation	evaluation: is this a good translation?
person 1	どもどもー！昨日、北海道からジンギスカンのお肉が届いたから、今夜はお肉三昧なのー、ホホホ！	Hey, what's up? I have a delivery from Hokkaido that arrived yesterday, Genghis Khan meat, so tonight I have lots of meat to eat, ha!	y
person 2	こんにちは。いいですね、羨ましいです。わたしは今夜名古屋めしを食べようかなって思ってます。	Hello. You're so lucky. I will be having Nagoya-food tonight.	y
person 1	名古屋めしも美味しいわよね！この間は、名古屋名物の味噌カツを取り寄せたわ！あなたもお取り寄せは好き？	Nagoya-food is also delicious! The other day, I ordered Nagoya's famous miso cutlets! Do you like ordering food from various places?	y
person 2	味噌カツおいしいですよね。愛知で育ったので結構身近な料理です。お取り寄せは私はあんまりしないです。名古屋めしばっかり食べてます…。	Miso cutlets are delicious, aren't they? I grew up in Aichi, so it is a familiar dish. I don't order a lot of different things. All I eat is Nagoya-food....	y
person 1	なるほど、地元の料理ってことね。わたしは家で取り寄せばっかりしてるから、こんな体型になっちゃって。。。自分ではグラマーだと思うけど、親には肥満って言われるわ。	I see, it's your local dish. I order food delivery all the time, so I look like this... I consider myself curvy, but my parents tell me that I'm obese.	y
person 2	親って自分の子供に厳しいですからね…。わたしも人の目を見て話しなさいってよく𠮟られましたよ。	Parents can be critical with their children. Mine would tell me to look at the person's eyes when you speak.	y
person 1	あー、親ってそういうこと言うわよね！あと、お天道様が見てるとか、何とかっていうのも、言われませんでした？	Yes, parents do say those things! And didn't they also say 'The sun is always watching you!' or something like that?	y
person 2	あー、言われましたね！どこの家庭も似たような感じなんですね。	Yes, they said that! Every family is pretty much the same.	y
person 1	ねー！でも、わたし、この歳まで生きてきて、神様なんていないって結論に達したわ。あなたは、宗教は信じる方？	I agree! I've lived this long and have come to the conclusion that there is no God. Do you believe in religion?	y
person 2	うーん、わたしもあんまりですね。でもプラモデルが好きなので、教会とかのプラモデルはよく作ってます。	Umm, not so much either. But I do like plastic models, and I often make plastic models of churches.	y
