# Supplementary material
Source: ML conference proceedings conference paper supplement (https://aclanthology.org/2022.eval4nlp-1.9)
Supplement: SupplementaryMaterial [file 0232.xlsx]

## Sheet: Sheet1
person	source	translation	evaluation: is this a good translation?
person 1	どもどもー！昨日、北海道からジンギスカンのお肉が届いたから、今夜はお肉三昧なのー、ホホホ！	Yesterday, I received three gallons of meat from the North coast, so tonight I'm starving.	n
person 2	こんにちは。いいですね、羨ましいです。わたしは今夜名古屋めしを食べようかなって思ってます。	Hello, I'm very lucky to have dinner with you tonight.	n
person 1	名古屋めしも美味しいわよね！この間は、名古屋名物の味噌カツを取り寄せたわ！あなたもお取り寄せは好き？	You used to like the name of a old gutter, too?	n
person 2	味噌カツおいしいですよね。愛知で育ったので結構身近な料理です。お取り寄せは私はあんまりしないです。名古屋めしばっかり食べてます…。	It's delicious because I grew up with love and I'm not very good at it.	n
person 1	なるほど、地元の料理ってことね。わたしは家で取り寄せばっかりしてるから、こんな体型になっちゃって。。。自分ではグラマーだと思うけど、親には肥満って言われるわ。	Well, I think it's just that I'm a local cook, so I think I'm getting myself into a house like this myself, Grammer.	n
person 2	親って自分の子供に厳しいですからね…。わたしも人の目を見て話しなさいってよく𠮟られましたよ。	My parents say it's tough to see me as a fat man.	n
person 1	あー、親ってそういうこと言うわよね！あと、お天道様が見てるとか、何とかっていうのも、言われませんでした？	Well, that's what my parents said, and you didn't say anything about watching the heavens?	n
person 2	あー、言われましたね！どこの家庭も似たような感じなんですね。	Oh, my God, you sound like a home!	n
person 1	ねー！でも、わたし、この歳まで生きてきて、神様なんていないって結論に達したわ。あなたは、宗教は信じる方？	But I've come to an conclusion that you don't believe in God, do you?	n
person 2	うーん、わたしもあんまりですね。でもプラモデルが好きなので、教会とかのプラモデルはよく作ってます。	Well, I like the movies too, but I like the movies too.	n
