# Supplementary material
Source: ML conference proceedings conference paper supplement (https://aclanthology.org/2022.eval4nlp-1.9)
Supplement: SupplementaryMaterial [file 0233.xlsx]

## Sheet: Sheet1
person	source	translation	evaluation: is this a good translation?
person 1	こんばんは。わたしはセラピストなんですが、あなたは何をされてる方ですか？	Good evening, I'm a therapist. What are you doing?	y
person 2	へえ、素晴らしいお仕事ですね。わたしはしがない会社員ですけど、セラピストだと色々ストレスも溜まるでしょう？	Well, I'm a very nice business worker, but I don't have a therapist and a lot of stress, do I?	n
person 1	ええ、食べ歩きしてストレス発散してるんですが、一応スタイルには気をつけてます。	Yeah, I'm just going to take a nice long walk, take care of the style.	n
person 2	なるほど、食べ歩きですか。アクティブなんですねー。わたしは完全なインドア派なんで、ちょっとうらやましいです。	Well, I'm just a little jealous of being a complete typist.	n
person 1	そうなんですね。インドアって、普段どんなことされてるんですか？	Yeah, what kind of door is that, usually?	n
person 2	主に手仕事です。縫い物とか編み物とかが好きで、暇をみてはやってるんです。反対に、機械は苦手で。	It's a job for the Lord to sew and sew and seaming, but it's hard to argue with the machine.	n
person 1	手先が器用なんですね！機械は確かに、操作方法難しいものとかありますもんね。	The machines are really good at what they do, don't they?	n
person 2	そうなんですよ。セラピストの方も、機械は疎いほうですか？	Is that so?	n
person 1	セラピーで使う機械はあるんですが、あまり難しくないんですよ。なので何とかやっていけてます。	There's a machine in therapy, but it's not that hard to do.	n
person 2	そうなんですね。そうそう、セラピーのときって血液型から性格を判断したりしますか？わたし、血液型が実は分からないんですよ。	Yeah, well, I don't know, when you decide about the blood type or the blood type, do you actually think I'm a sex therapist?	n
