# Supplementary material
Source: ML conference proceedings conference paper supplement (https://aclanthology.org/2022.eval4nlp-1.9)
Supplement: SupplementaryMaterial [file 0233.xlsx]

## Sheet: Sheet1
person	source	translation	evaluation: is this a good translation?
person 1	こんばんは。わたしはセラピストなんですが、あなたは何をされてる方ですか？	Good evening. I am a therapist. What do you do for a living?	y
person 2	へえ、素晴らしいお仕事ですね。わたしはしがない会社員ですけど、セラピストだと色々ストレスも溜まるでしょう？	Wow, that's a wonderful profession. I'm only an office worker. Being a therapist must be stressful, am I right?	y
person 1	ええ、食べ歩きしてストレス発散してるんですが、一応スタイルには気をつけてます。	Yes, it can be. I manage my stress by eating out, but I'm careful about my weight.	y
person 2	なるほど、食べ歩きですか。アクティブなんですねー。わたしは完全なインドア派なんで、ちょっとうらやましいです。	I see, eating out. You are active. I'm a bit envious because I'm a complete indoor person.	y
person 1	そうなんですね。インドアって、普段どんなことされてるんですか？	Is that right? What do you usually do inside?	y
person 2	主に手仕事です。縫い物とか編み物とかが好きで、暇をみてはやってるんです。反対に、機械は苦手で。	I mainly work with my hands. I like sewing and knitting, so whenever I can find the time, that's what I do. On the other hand, I'm not good with machines.	y
person 1	手先が器用なんですね！機械は確かに、操作方法難しいものとかありますもんね。	You are very dexterous! Machines certainly can be difficult to operate.	y
person 2	そうなんですよ。セラピストの方も、機械は疎いほうですか？	Yes, that's true. As a therapist, do you find it hard to operate machines?	y
person 1	セラピーで使う機械はあるんですが、あまり難しくないんですよ。なので何とかやっていけてます。	There is a machine we use in therapy, but that's not very difficult. So I can somehow manage.	y
person 2	そうなんですね。そうそう、セラピーのときって血液型から性格を判断したりしますか？わたし、血液型が実は分からないんですよ。	That's good. By the way, would you ask your patients about their blood type to judge their personality in your therapy sessions? I actually don't know what my blood type is.	y
