# Supplementary material
Source: ML conference proceedings conference paper supplement (https://aclanthology.org/2022.eval4nlp-1.9)
Supplement: SupplementaryMaterial [file 0234.xlsx]

## Sheet: Sheet1
person	source	translation	evaluation: is this a good translation?
person 1	あら、こんにちは。ちょっと、土いじりしてたものだから、顔が汚れてないかしら。	Oh, hello, it's just a bit of a mess, so your face isn't dirty.	n
person 2	こんにちは。大丈夫そうですよ。あなたは農家さんとかですか？	Hello. Are you a farmhouse or something?	n
person 1	いえいえ、趣味で庭をいじってるだけなんです。あなたは、どちらかにお勤めですか？	No, just some hobby, do you work somewhere?	y
person 2	わたしは中学生なんです。愛媛から転校してきたばっかりなんですよ。	I'm just a schoolboy, and I'm just beginning to fall in love with someone.	n
person 1	あら、まだ学生さんだったんですか。転校先でお友達はもう出来ましたか？	Oh, were you still a student before school?	n
person 2	学校でホラー映画が流行ってるんですけど、わたしはホラー映画とか暗い場所とかが苦手で、あまり話についていけてないです。	There's a horror movie going to school, but I'm not too scared to talk about horror movies or horror movies.	n
person 1	怖いですもんね、ホラー映画！わたしも苦手ですよ。わたしは、青空と太陽の下、広々とした庭でガーデニングするほうが幸せです。	I'm not afraid of horror movies and blue lights, and I'm better off in the garden, and I'm better off in the yard.	n
person 2	いいですね。わたし、そういった明るい趣味のお友達がほしいです。	That's a nice friend of mine, huh?	n
person 1	歳は離れてますけど、わたしとお友達になりましょうよ！わたしね、血液型はO型で、おおらかだし、肝っ玉母ちゃんみたいに思ってくれてもいいですよ！	I'm a old man but I'll be a friend of blood and blood, like my mother!	n
person 2	ほんとうですか？嬉しいです！わたしの家はお父さんがいなくて、母子家庭なのでもうひとり頼れる人がいると心強いです！	I'm so glad you think I'm not home anymore, Mom.	n
