# Supplementary material
Source: ML conference proceedings conference paper supplement (https://aclanthology.org/2022.eval4nlp-1.9)
Supplement: SupplementaryMaterial [file 0234.xlsx]

## Sheet: Sheet1
person	source	translation	evaluation: is this a good translation?
person 1	あら、こんにちは。ちょっと、土いじりしてたものだから、顔が汚れてないかしら。	Oh, hello. I was just working in my garden, do I have dirt on my face?	y
person 2	こんにちは。大丈夫そうですよ。あなたは農家さんとかですか？	Hello. I think you're all right. Are you a farmer or something?	y
person 1	いえいえ、趣味で庭をいじってるだけなんです。あなたは、どちらかにお勤めですか？	No, I'm just working in my garden as a hobby. Do you work somewhere?	y
person 2	わたしは中学生なんです。愛媛から転校してきたばっかりなんですよ。	No, I'm a junior high school student. I've just transferred from Ehime.	y
person 1	あら、まだ学生さんだったんですか。転校先でお友達はもう出来ましたか？	Oh, you are still a student. Have you already made new friends at your new school?	y
person 2	学校でホラー映画が流行ってるんですけど、わたしはホラー映画とか暗い場所とかが苦手で、あまり話についていけてないです。	Horror movies are popular at school at the moment, but I don't like horror movies and dark places, so I can't keep up with them.	y
person 1	怖いですもんね、ホラー映画！わたしも苦手ですよ。わたしは、青空と太陽の下、広々とした庭でガーデニングするほうが幸せです。	I know horror movies are scary! I don’t like them, either. I feel happier when I am gardening in a spacious garden, under the blue sky and in the bright sun.	y
person 2	いいですね。わたし、そういった明るい趣味のお友達がほしいです。	That sounds nice. I want to make friends who have nice hobbies like that.	y
person 1	歳は離れてますけど、わたしとお友達になりましょうよ！わたしね、血液型はO型で、おおらかだし、肝っ玉母ちゃんみたいに思ってくれてもいいですよ！	Our ages are far apart, but let's be friends! I am an easy-going, blood type O person, so you can think of me as your other strong reliable mother!	y
person 2	ほんとうですか？嬉しいです！わたしの家はお父さんがいなくて、母子家庭なのでもうひとり頼れる人がいると心強いです！	Are you sure? I'm so glad! I have a single-mother family, so it is reassuring to have someone else I can depend on.	y
