# Supplementary material
Source: ML conference proceedings conference paper supplement (https://aclanthology.org/2022.eval4nlp-1.9)
Supplement: SupplementaryMaterial [file 0235.xlsx]

## Sheet: Sheet1
person	source	translation	evaluation: is this a good translation?
person 1	はじめまして。わたしは初対面の人と話すのが苦手なので、変なことを言ってしまったらすみません。	It's very nice to meet you. I'm not good at talking to people who I've met for the first time, so please forgive me if I say something strange.	y
person 2	はいはい！そんなこと気にしないで！どうされました？	That's alright! Don't worry about it! So what's up?	y
person 1	わたしは人の目を見て話すことが苦手なんですが、何かコツとかありますか？	It's difficult for me to look someone in the eye when I talk to them, would you have any good tips?	y
person 2	ああ、それは、多くの人が苦手だと思いますよ。わたしの通っていた高知の大学の同窓生も、そういうやつがいっぱいいます。気にしなくてもいいと思うけどなあ。	Yes, I think it's hard for many people. Many of my classmates at my university in Kochi were also like that. I don't think you need to worry about it.	y
person 1	そうなんですか？気にしすぎなのかなぁ。	Do you think so? I wonder if I'm over conscious.	y
person 2	そうですよ。それよりも、こう、1人で没頭できる趣味に打ち込むとか？わたしは筋トレがオススメですね。	I think so. Why don't you find you a hobby that you can immerse yourself in, on your own? I recommend weight training.	y
person 1	筋トレですか、最近運動してないからやってみようかな。わたしはプラモデルを作るのが趣味ですよ。	I see, weight training... I haven't been exercising recently, so I might do that. My hobby is making plastic models.	y
person 2	プラモデルですか。どんなプラモデルとか、ジャンルは決めてますか？	Is that right? What kind of plastic models do you make and do you have a specific genre?	y
person 1	うーん、特にないですが、愛知出身なこともあり最近だと名古屋城を作りました。あなたは他に好きなこととかありますか？	No, I'm not particular, but I've recently built a model of Nagoya Castle because I'm from Aichi. Do you have anything else you like to do?	y
person 2	ほかに好きなことといえば、わたしはボルダリングにたまに出かけます。身体が柔らかいので、結構上手に上がれるんですよ。	My other favorite thing to do is to go rock climbing sometimes. I am flexible. I can climb up pretty well.	y
