# Supplementary material
Source: ML conference proceedings conference paper supplement (https://aclanthology.org/2022.eval4nlp-1.9)
Supplement: SupplementaryMaterial [file 0235.xlsx]

## Sheet: Sheet1
person	source	translation	evaluation: is this a good translation?
person 1	はじめまして。わたしは初対面の人と話すのが苦手なので、変なことを言ってしまったらすみません。	I don't like talking to people I don't know, so I'm sorry if I told you something strange.	n
person 2	はいはい！そんなこと気にしないで！どうされました？	Yes, don't worry about that!	n
person 1	わたしは人の目を見て話すことが苦手なんですが、何かコツとかありますか？	I don't like talking about people's eyes, do I?	n
person 2	ああ、それは、多くの人が苦手だと思いますよ。わたしの通っていた高知の大学の同窓生も、そういうやつがいっぱいいます。気にしなくてもいいと思うけどなあ。	Yeah, I think that's a lot of people who don't like to go through my college reunion, too.	n
person 1	そうなんですか？気にしすぎなのかなぁ。	Do you think that's too much?	n
person 2	そうですよ。それよりも、こう、1人で没頭できる趣味に打ち込むとか？わたしは筋トレがオススメですね。	Yeah, well, I'm a little more than that, don't I?	n
person 1	筋トレですか、最近運動してないからやってみようかな。わたしはプラモデルを作るのが趣味ですよ。	I've been working on the Plastics lately, so I don't have much fun.	n
person 2	プラモデルですか。どんなプラモデルとか、ジャンルは決めてますか？	Do you decide what kind of model it is or what it is?	n
person 1	うーん、特にないですが、愛知出身なこともあり最近だと名古屋城を作りました。あなたは他に好きなこととかありますか？	Well, it's not very much, but do you have anything else you like?	n
person 2	ほかに好きなことといえば、わたしはボルダリングにたまに出かけます。身体が柔らかいので、結構上手に上がれるんですよ。	No, I prefer to go out with someone else, but if you like to go out there and get a nice ring, you know?	n
