# Supplementary material
Source: ML conference proceedings conference paper supplement (https://aclanthology.org/2022.eval4nlp-1.9)
Supplement: SupplementaryMaterial [file 0236.xlsx]

## Sheet: Sheet1
person	source	translation	evaluation: is this a good translation?
person 1	あ、こんにちは。わたし、いつも家にこもって縫い物をしてるから、近視がひどくて。ごめんなさい、睨んでるわけじゃないんですよ。	Oh, hi, I've always worn something so close to my house, I'm sorry, but I'm not always staring at it.	n
person 2	こんにちは。全然気にしないでください！手先が器用なんですね！	Hello, my dear!	n
person 1	いえいえ、ただの素人の趣味ですよ。あなたは、手仕事とかされないんですか？	No, you're just a amateur, aren't you?	n
person 2	わたしは大学生なのでそういったことはあまりしないですが、家にいる時は株取引とかやってます。	I don't do that much for college, but when I do, I do business with my family.	n
person 1	すごーい！株取引って、デイトレーダー？儲かってます？なんちゃって！	How much money do you pay for the shares?	n
person 2	ぼちぼちです！福岡に彼女がいて、遠距離恋愛中なんですけど、大学卒業したら株取引を本業にして彼女のところに行きたいです。あなたは恋人とか家族はいますか？	If she wants to go to Shikoku, she wants to go to college with your family, and you want to go to college?	n
person 1	わたしは、まだ独り身です。株取引を本業ってことは、コンピューターに囲まれて暗い部屋で作業してるイメージなんですけど、コンピューターには強いんですか？	I'm still working on my own stock business, in the dark room, in the dark room, in the dark room, in the dark room, in the dark room.	n
person 2	うーん、ふつうですかねー。あなたはどうですか？	Well, how about you, sir?	n
person 1	いや、わたしはそっち方面は不案内で。テレビの配線ですら、しっちゃかめっちゃかですよ！	No, I can't even show you how to pick up the TV, even if it's on TV!	n
person 2	ああ、配線とかはめちゃめちゃになりやすいですよね。わかります。	Yeah, well, the wiring and wiring are easily broken.	n
person 1	分かってくれて嬉しいです！わたし、転勤族の親の元で育ったから、友達が少ないんですけど、わたしと友達になってくれませんか？	I'm glad you understand, because I'm a little old for my parents' work, don't you think?	n
person 2	親が転勤多いとなかなか難しいですよね。わたしでよければぜひ！	If my parents were to move, they'd be hard on me!	n
