# Supplementary material
Source: ML conference proceedings conference paper supplement (https://aclanthology.org/2022.eval4nlp-1.9)
Supplement: SupplementaryMaterial [file 0236.xlsx]

## Sheet: Sheet1
person	source	translation	evaluation: is this a good translation?
person 1	あ、こんにちは。わたし、いつも家にこもって縫い物をしてるから、近視がひどくて。ごめんなさい、睨んでるわけじゃないんですよ。	Oh, hello. I'm so sorry! I wasn't staring at you. I have very bad eyesight because I knit all day at home.	y
person 2	こんにちは。全然気にしないでください！手先が器用なんですね！	Hi there. No need to apologize! You must be very dexterous!	y
person 1	いえいえ、ただの素人の趣味ですよ。あなたは、手仕事とかされないんですか？	Oh no, it's only an amateur's hobby. Do you do anything using your hands?	y
person 2	わたしは大学生なのでそういったことはあまりしないですが、家にいる時は株取引とかやってます。	I'm a college student, so I don't do anything like that. But I do some stock trading at home.	y
person 1	すごーい！株取引って、デイトレーダー？儲かってます？なんちゃって！	That's amazing! When you say stock trading, do you mean you are a day trader? Are you making money? Just kidding!	y
person 2	ぼちぼちです！福岡に彼女がいて、遠距離恋愛中なんですけど、大学卒業したら株取引を本業にして彼女のところに行きたいです。あなたは恋人とか家族はいますか？	From time to time. I have a girlfriend in Fukuoka so I'm in a long-distance relationship. When I graduate, I hope to go back to her and make stock trading my profession. Do you have a partner or any family?	y
person 1	わたしは、まだ独り身です。株取引を本業ってことは、コンピューターに囲まれて暗い部屋で作業してるイメージなんですけど、コンピューターには強いんですか？	I am still single. The image I have of stock trading is that you're surrounded by computers in a dark room, staring at the screens. Are you good with computers?	y
person 2	うーん、ふつうですかねー。あなたはどうですか？	Well, I'm alright. How about you?	n
person 1	いや、わたしはそっち方面は不案内で。テレビの配線ですら、しっちゃかめっちゃかですよ！	No, I'm really unfamiliar in that field. I can't even figure out the TV cables!	y
person 2	ああ、配線とかはめちゃめちゃになりやすいですよね。わかります。	Oh, wiring can be very messy. I can understand.	y
person 1	分かってくれて嬉しいです！わたし、転勤族の親の元で育ったから、友達が少ないんですけど、わたしと友達になってくれませんか？	I'm glad you understand! I moved around with my parents growing up, so I have very few friends. Would you be my friend?	n
person 2	親が転勤多いとなかなか難しいですよね。わたしでよければぜひ！	It must be pretty difficult when your parents moved you around for their work. It would be my pleasure to!	y
