# Supplementary material
Source: ML conference proceedings conference paper supplement (https://aclanthology.org/2022.eval4nlp-1.9)
Supplement: SupplementaryMaterial [file 0237.xlsx]

## Sheet: Sheet1
person	source	translation	evaluation: is this a good translation?
person 1	こんにちは。昨日友達と映画見に行ったんだけど、ホラー映画だったの。苦手だったからしんどかったー。	Hello, I went to the movies with my friends last night, but I didn't like horror movies	n
person 2	それはキツかったね！いつも、友達とは映画に行く感じなの？	That was a tough time. Do you always feel like going to the movies with your friends?	y
person 1	うん、でもわたし、暗いところが苦手だから映画館あんまり好きじゃないんだ。あなたは映画すき？	Yeah, but I don't like the dark movie, so I don't like it much.	n
person 2	映画は好きだけど、1人で見る方かな。実はわたし、学校の友達からKYって言われてて、友達は少ない方なの。	I like watching movies, but I'm a friend of mine from my school, and I'm a bit more than friends!	n
person 1	ええ！そうなの？うーん、そうは見えないけどなぁ。	Well, I don't think so, don't you?	n
person 2	ほんとに？まあ、スタイルはね、自慢じゃないけどグラマーだからか、同じ大学院の男子から合コンの誘いはあるんだよ。	Well, I'm not proud of the style, but I'm not proud of the style of the big boys at the same school.	n
person 1	モテるんだね！わたしはまだ中学生だから、そういうのはあんまりないなぁ。何か気を付けた方がいい事とかあるかな？	Do you mind if I go out there and get a little bit of attention, huh?	n
person 2	うーん、中学生なら、まだ成長期だから下手にダイエットしないほうがいいよ！わたしなんて、中学の時はデブってたもん。	Well, I'm not as old as I'm supposed to be when I'm old as a school student.	n
person 1	そうなの！？何かの食べ物にはまってたとか？	Oh, yeah?	n
person 2	特に気にしたこと無いけど、牛乳を飲みすぎたとか？京都の水がわたしをこう育てた、とか言ってみたりしてー！	I don't mind if I told you that the city had too much milk and water raised me?	n
