# Supplementary material
Source: ML conference proceedings conference paper supplement (https://aclanthology.org/2022.eval4nlp-1.9)
Supplement: SupplementaryMaterial [file 0237.xlsx]

## Sheet: Sheet1
person	source	translation	evaluation: is this a good translation?
person 1	こんにちは。昨日友達と映画見に行ったんだけど、ホラー映画だったの。苦手だったからしんどかったー。	Hello. I went to the movies with my friends yesterday but it was a horror movie. I don't like horror movies so it was difficult.	n
person 2	それはキツかったね！いつも、友達とは映画に行く感じなの？	That must've been! Do you usually go to the movies with your friends?	y
person 1	うん、でもわたし、暗いところが苦手だから映画館あんまり好きじゃないんだ。あなたは映画すき？	Yes, but I really don't like dark places so I don't like movie theaters either. Do you like movies?	y
person 2	映画は好きだけど、1人で見る方かな。実はわたし、学校の友達からKYって言われてて、友達は少ない方なの。	Yes, I do but I usually watch movies on my own. Actually, my school mates say I'm thick, and I don't have many friends.	n
person 1	ええ！そうなの？うーん、そうは見えないけどなぁ。	Really?! You don't seem that way.	y
person 2	ほんとに？まあ、スタイルはね、自慢じゃないけどグラマーだからか、同じ大学院の男子から合コンの誘いはあるんだよ。	Do you think? Well, I'm not bragging but I do have a full figure and I do get invited to go to out to parties by boys from my graduate school because of that.	y
person 1	モテるんだね！わたしはまだ中学生だから、そういうのはあんまりないなぁ。何か気を付けた方がいい事とかあるかな？	You are popular! I'm still a junior high school student, so things like that don't happen so much. Is there anything I should be careful about?	y
person 2	うーん、中学生なら、まだ成長期だから下手にダイエットしないほうがいいよ！わたしなんて、中学の時はデブってたもん。	Well, if you're a junior high school student, you are still growing, so you shouldn't go on diets! I was pretty chubby when I was in junior high school.	y
person 1	そうなの！？何かの食べ物にはまってたとか？	Really!? Were you into some kind of food?	y
person 2	特に気にしたこと無いけど、牛乳を飲みすぎたとか？京都の水がわたしをこう育てた、とか言ってみたりしてー！	I wasn’t so careful about anything. Maybe I drank too much milk? Or I like to say that the water in Kyoto made me this way!	y
