# Supplementary material
Source: ML conference proceedings conference paper supplement (https://aclanthology.org/2022.eval4nlp-1.9)
Supplement: SupplementaryMaterial [file 0238.xlsx]

## Sheet: Sheet1
person	source	translation	evaluation: is this a good translation?
person 1	こんにちは。夏になるといつも思うんですけど、あの、ゴーヤって食べ物なんですかねー？	Hello, I always thought it would be a summer, but is that bitter melon?	n
person 2	こんにちは。ゴーヤ苦手なんですか？	Hello. You don't like bitter melon?	n
person 1	ゴーヤを筆頭に、苦いもの全般がNGなんです。あなたはイケる口ですか？	All the bitter melon in your head is G-Man's mouth, do you speak loud?	n
person 2	そうなんですね。ゴーヤは食べられなくはないですが、この間食べた長崎ちゃんぽんにゴーヤがトッピングされてたのには驚きました。	I know, but I can't eat bitter melon last night but I was surprised by bitter melon.	n
person 1	へえ、そんなちゃんぽんが出てきたら、わたしは絶対食べられないな！その代わり、わたしは酢の物が大好きなんですよー。	Oh, I can't eat that bitter melon when I get out!	n
person 2	長い間長崎に住んでるので、変わったちゃんぽんにも慣れました。酢の物ですか！健康に良さそうでいいですね！	I've been living in Nagasaki for a long time, and I'm getting used to it.	n
person 1	健康っていうか、酢の物を食べて育ったせいか、身体が柔らかいのが自慢です。長崎には、ちゃんぽん以外に何か名物はありますか？	Have you ever been so proud of anything besides eating, Miss Isobel's health and eating something nice?	n
person 2	カステラとかですかね。ネットでも買えますよ！わたしはネットショッピングが好きなんですが、あなたは好きなものとかありますか？	Do I like shopping on the Internet or what you like?	n
person 1	長崎カステラね！わたしは、甘いものは好きなんですが、筋トレが趣味なので砂糖とか炭水化物は控えてるんです。	Morisakila, I like your taste, but I like your taste, so I don't have any sugar or sugar.	n
person 2	なるほど、えらいですね。何か得意なスポーツとかあるんですか？	Well, do you like sports?	n
