# Supplementary material
Source: ML conference proceedings conference paper supplement (https://aclanthology.org/2022.eval4nlp-1.9)
Supplement: SupplementaryMaterial [file 0238.xlsx]

## Sheet: Sheet1
person	source	translation	evaluation: is this a good translation?
person 1	こんにちは。夏になるといつも思うんですけど、あの、ゴーヤって食べ物なんですかねー？	Hello. When summer comes around I always wonder what that bitter gourd thing is.	y
person 2	こんにちは。ゴーヤ苦手なんですか？	Hi. So, you don't like bitter gourd?	y
person 1	ゴーヤを筆頭に、苦いもの全般がNGなんです。あなたはイケる口ですか？	I don't like bitter gourd to start with and bitter flavors are a "no go" in general. Do you like them?	y
person 2	そうなんですね。ゴーヤは食べられなくはないですが、この間食べた長崎ちゃんぽんにゴーヤがトッピングされてたのには驚きました。	You don't like them, huh? I'm okay with bitter gourd, but the other day, I was shocked when the Nagasaki-champon noodles was served with bitter gourd on top.	y
person 1	へえ、そんなちゃんぽんが出てきたら、わたしは絶対食べられないな！その代わり、わたしは酢の物が大好きなんですよー。	Oh my god, if the noodles came with those, I would not be able to eat them! Instead, I love vinegared food.	y
person 2	長い間長崎に住んでるので、変わったちゃんぽんにも慣れました。酢の物ですか！健康に良さそうでいいですね！	I've lived in Nagasaki for a long time, so I'm now used to strange champon noodles. You like vinegared food? It sounds healthy!	y
person 1	健康っていうか、酢の物を食べて育ったせいか、身体が柔らかいのが自慢です。長崎には、ちゃんぽん以外に何か名物はありますか？	I am not sure if it's healthy, but I grew up eating vinegared food and I am proud of my flexible body. Are there any other special foods from Nagasaki other than champon?	y
person 2	カステラとかですかね。ネットでも買えますよ！わたしはネットショッピングが好きなんですが、あなたは好きなものとかありますか？	Maybe, Castella cakes? You can buy them online! I like to shop online. What do you like to do?	y
person 1	長崎カステラね！わたしは、甘いものは好きなんですが、筋トレが趣味なので砂糖とか炭水化物は控えてるんです。	Oh Nagasaki Castella! I like sweets, but my hobby is weight training, so I try not to take sugar or carbohydrates.	y
person 2	なるほど、えらいですね。何か得意なスポーツとかあるんですか？	Is that right? You are disciplined. Do you have any sports you are good at?	y
