# Supplementary material
Source: ML conference proceedings conference paper supplement (https://aclanthology.org/2022.eval4nlp-1.9)
Supplement: SupplementaryMaterial [file 0239.xlsx]

## Sheet: Sheet1
person	source	translation	evaluation: is this a good translation?
person 1	こんにちは。わたしは骨ばった体型がコンプレックスなんだけど、どうしたらいいかなぁ。	Hello. I have a very bony body. What can I do about it?	y
person 2	骨ばってると思うから、コンプレックスになるんじゃない？スレンダーっていえば、魅力の1つになると思うけどな！	Because you think you're bony, you might see it as your complex. Why don't you say you're slender, then it can be one of your charms!	y
person 1	実は遠距離恋愛中の彼女に骨ばってるねって言われたんだ。でもそういう考え方もあるんだね、自信持とうかなぁ。	Actually, I have a long distance relationship with a girl who told me that I am bony. I didn't think about it that way, I should be more confident.	y
person 2	そうだよ！自信持ちなよ！わたしも、胸はぺったんこだけど、ウエストが細いのをアピールして、前向きに生きてるんだから！	There you go! You should be confident! I am flat chested, but I try to be positive and show off my thin waist!	y
person 1	そうだね、自信持つ！ところでわたしは大学生なんだけど、あなたは？	You're right, I will be more confident! By the way, I'm a college student. What about you?	y
person 2	わたしは、去年から社会人として会社に行ってるよ。わたしさ、体型のこともだけど、人の悪口言う人って、ホント嫌いなんだよね。	I started working from last year. I really don't like people who speak ill of others, even if it's only about your body.	y
person 1	たしかに人の悪口言う人っていやだよね。飲み会の場だと普段より悪化しない？わたしはお酒苦手だから飲めないんだけど、いつも苦笑いでごまかしてるよ。	Certainly, it really isn't nice to say bad things about other people. Don't you think it gets worse at drinking parties? I can't drink much, so I tend not to, but I always just smile and nod.	y
person 2	悪化する！人の悪口って、気分悪くなるよね。わたしが今住んでるのは東北なんだけど、結構閉鎖的でさあ、参っちゃうよ。	That's awful! People bad mouthing each other makes me sick. I live in Tohoku right now. And I find people here are quite narrow-minded and I can't stand it.	y
person 1	そうなんだ、そんな感じだとストレスとか溜まらない？	You're right. Isn't it stressful, if people are like that?	y
person 2	たまるよー。そういうときは、大好きなくまモングッズを眺めて、熊本に思いを馳せるの。	Yes, it is. But at times like that, I look at my favorite Kumamon novelty and think about Kumamoto.	y
