# Supplementary material
Source: ML conference proceedings conference paper supplement (https://aclanthology.org/2022.eval4nlp-1.9)
Supplement: SupplementaryMaterial [file 0239.xlsx]

## Sheet: Sheet1
person	source	translation	evaluation: is this a good translation?
person 1	こんにちは。わたしは骨ばった体型がコンプレックスなんだけど、どうしたらいいかなぁ。	Hello, I'm a dead body model, but I don't know what to do.	n
person 2	骨ばってると思うから、コンプレックスになるんじゃない？スレンダーっていえば、魅力の1つになると思うけどな！	I think it's going to be one of the most attractive calendar in the world, but it's going to be one of those.	n
person 1	実は遠距離恋愛中の彼女に骨ばってるねって言われたんだ。でもそういう考え方もあるんだね、自信持とうかなぁ。	In fact, you said she was a long way away from love, but I think that's a good idea.	n
person 2	そうだよ！自信持ちなよ！わたしも、胸はぺったんこだけど、ウエストが細いのをアピールして、前向きに生きてるんだから！	Yeah, well, I think she's alive, too, and I'm in the West, and I'm in the middle of something!	n
person 1	そうだね、自信持つ！ところでわたしは大学生なんだけど、あなたは？	So you think I'm a college student, then?	n
person 2	わたしは、去年から社会人として会社に行ってるよ。わたしさ、体型のこともだけど、人の悪口言う人って、ホント嫌いなんだよね。	I've been to the social company since last year, but I don't like people who say bad things about people who say bad things about people.	n
person 1	たしかに人の悪口言う人っていやだよね。飲み会の場だと普段より悪化しない？わたしはお酒苦手だから飲めないんだけど、いつも苦笑いでごまかしてるよ。	No, I mean, I don't usually drink worse than people, but I don't drink anymore, do I?	n
person 2	悪化する！人の悪口って、気分悪くなるよね。わたしが今住んでるのは東北なんだけど、結構閉鎖的でさあ、参っちゃうよ。	It's gonna get worse, but I live in the east, and now I'm in the east, so don't worry about it.	n
person 1	そうなんだ、そんな感じだとストレスとか溜まらない？	Does that make you feel like you're having stress?	y
person 2	たまるよー。そういうときは、大好きなくまモングッズを眺めて、熊本に思いを馳せるの。	No, no, no, no, no, no, no, no, no, no, no, no, no, no, no, no, no, no, no, no.	n
