# Supplementary material
Source: ML conference proceedings conference paper supplement (https://aclanthology.org/2022.eval4nlp-1.9)
Supplement: SupplementaryMaterial [file 0240.xlsx]

## Sheet: Sheet1
person	source	translation	evaluation: is this a good translation?
person 1	こんにちは、最近どうされていましたか？	Hello, how have you been lately?	y
person 2	あ、こんにちわ。いやいや派遣先でモメちゃって、ちょっとブルーなんですよ。	Oh, no, no, no, no, no, no, no, no, no, no, no, no. It's just a little blue.	n
person 1	あら、大丈夫ですか？仕事で揉めると憂鬱な気分になりますよね。	Oh, you're gonna be okay with your work, aren't you?	n
person 2	ええ、愚痴になりますけど、その会社って仕事柄なのか喫煙者ばっかりで、タバコの臭いの苦手な私には結構キツい派遣先だったんです。中々言い出せなくて、人と争うの苦手だから。	Yeah, well, that company's got a lot to do, but it's got a lot to do with a cigarette or smoke or smoke or smoke, and I've had a hard time sending it to you.	n
person 1	わー。それは辛いですね。わたしは空気を読むのが苦手で大学院でもしょっちゅうトラブル起こしちゃうんです。反省しなきゃ。	I don't know how hard it is to read in the middle of the day, but it's hard to read when people get into trouble.	n
person 2	同じですねえ。あ、今大学院生なんですか。じゃあ勉強が大変じゃないですか。	That's not the same school, is it?	n
person 1	うーん。実は今ネットオークションに興味があって。全然勉強してない！	Actually, I'm not interested in the Nebuchadnezzar!	n
person 2	私もネットオークション良く利用しますよ。主に絵の道具。美大の頃に戻って時々絵を描いたりするんですよ。あでも勉強はしましょうね。	I used to use the Internet as a sculpture, and sometimes I study the art of art and study the art of art.	n
person 1	絵描くんですかー！じゃあ、わたしを描いてください！自分でいうのもなんですが、結構グラマーな体型なのでいいモデルになると思いますよ！	- Well, you can paint me as much as you want!	n
person 2	そうですねえ、お顔立ちは綺麗だし、バランスよくグラマー体型だし。じゃあ今度お願いしようかしら。幾らかお出ししますよ。	Now, let me show you something, Grammer.	n
