# Supplementary material
Source: ML conference proceedings conference paper supplement (https://aclanthology.org/2022.eval4nlp-1.9)
Supplement: SupplementaryMaterial [file 0240.xlsx]

## Sheet: Sheet1
person	source	translation	evaluation: is this a good translation?
person 1	こんにちは、最近どうされていましたか？	Hello, what have you been up to lately?	y
person 2	あ、こんにちわ。いやいや派遣先でモメちゃって、ちょっとブルーなんですよ。	Oh, hello. I'm feeling blue because there was some trouble at my temp job.	y
person 1	あら、大丈夫ですか？仕事で揉めると憂鬱な気分になりますよね。	Oh no, are you all right? I can understand you feeling depressed when you get into trouble at work.	y
person 2	ええ、愚痴になりますけど、その会社って仕事柄なのか喫煙者ばっかりで、タバコの臭いの苦手な私には結構キツい派遣先だったんです。中々言い出せなくて、人と争うの苦手だから。	Thanks, I hope you don't mind listening to my complaints. The company I worked for had a lot of smokers, could be due to their profession. So it was really hard for me since I cannot stand the smell of cigarette smoke. I really couldn't come out and say anything because I don't like conflict.	y
person 1	わー。それは辛いですね。わたしは空気を読むのが苦手で大学院でもしょっちゅうトラブル起こしちゃうんです。反省しなきゃ。	Oh no, that must have been awful! I'm not very good at noticing what's happening, so I get in trouble all the time at graduate school. I need to be more mindful.	y
person 2	同じですねえ。あ、今大学院生なんですか。じゃあ勉強が大変じゃないですか。	You and I are the same. So you are currently a graduate student? You must have a lot of work to do.	y
person 1	うーん。実は今ネットオークションに興味があって。全然勉強してない！	Well, kind of. Actually, I'm interested in online auctions at the moment and I haven't studied at all!	y
person 2	私もネットオークション良く利用しますよ。主に絵の道具。美大の頃に戻って時々絵を描いたりするんですよ。あでも勉強はしましょうね。	I also go to online auctions, as well. I use them mainly for buying my painting tools. I draw sometimes like I used to back at art college. But hey, you should study.	y
person 1	絵描くんですかー！じゃあ、わたしを描いてください！自分でいうのもなんですが、結構グラマーな体型なのでいいモデルになると思いますよ！	You draw? Would you like to draw me then?! I don't mean to brag but I think I can be a good model because of my full figure!	y
person 2	そうですねえ、お顔立ちは綺麗だし、バランスよくグラマー体型だし。じゃあ今度お願いしようかしら。幾らかお出ししますよ。	Yes, you do have a beautiful face and a well proportioned and curvy figure. I might ask you to model for me some time. I think I can pay you, too.	y
