# Supplementary material
Source: ML conference proceedings conference paper supplement (https://aclanthology.org/2022.eval4nlp-1.9)
Supplement: SupplementaryMaterial [file 0241.xlsx]

## Sheet: Sheet1
person	source	translation	evaluation: is this a good translation?
person 1	初めまして、私はフリーターをしているものです。普段は何をされていますか。	Nice to meet you, I'm a part-time worker. What do you usually do for work?	y
person 2	はじめまして！私は最近鹿児島から引っ越してきたばかりで仕事についてなくて専業主婦です。	Nice to meet you, too! I have just moved from Kagoshima recently, so I'm not working at the moment. I am a full-time housewife now.	y
person 1	そうなんですね。私はずっと長崎に住んでいるんですが、いずれ上京するつもりです。どちらに引っ越されたんですか。	I see. I have lived in Nagasaki all my life, but I intend to go to Tokyo one day. Where did you move to?	y
person 2	大阪に引っ越してきました。こちらは美味しい焼き肉屋さんが多くて焼き肉が大好物なわたしにはピッタリの場所でした。	I moved to Osaka. This is my perfect place, because there are so many good BBQ restaurants and I love yakiniku.	y
person 1	焼肉いいですね。私は人付き合いが基本的に苦手で、店員さんとのやりとりも嫌なので、基本的にネットショッピングで全て済ませてしまいます。	Yakiniku sounds good. I'm basically not good with people, not even interacting with shop clerks, so I do all my shopping online.	y
person 2	わかります！ネットショッピングは便利ですしね。わたしは香水をプンプン匂わせている人が苦手で近くをすれ違っただけで頭が痛くなり悩みの種です。	I know what you mean! Online shopping is convenient. I hate it when I come across people with too much perfume on. Even just in passing, the smell gives me a headache. It is a problem for me.	y
person 1	わかります。なんとなく不快ですよね。頭が痛くなるほどなのはお辛いですね。	I can understand. It can be unpleasant. It must be difficult if it gives you headaches.	y
person 2	そうなんです。鹿児島ではあまりいなかったのですが大阪では香水をつけている人が多くて参っています。ところでわたし、ピアノを始めようと思っているのですが手が小さくて。	It is a problem. There weren't too many people like that in Kagoshima, but in Osaka, there are a lot of people who wear perfume. By the way, I want to start taking piano lessons, but I feel my hands are too small.	y
person 1	私も以前ピアノをやっていました。手を開くトレーニングで十分届くようになりましたよ。	I used to play the piano. My hands opened up after doing some exercises.	y
person 2	ピアノやっていたんですね！手を開くトレーニングがあるなんて初耳です！	You used to play the piano! I've never heard that you can train your hands to open up!	y
