# Supplementary material
Source: ML conference proceedings conference paper supplement (https://aclanthology.org/2022.eval4nlp-1.9)
Supplement: SupplementaryMaterial [file 0241.xlsx]

## Sheet: Sheet1
person	source	translation	evaluation: is this a good translation?
person 1	初めまして、私はフリーターをしているものです。普段は何をされていますか。	It's nice to meet you, sir. What do I do usually do?	n
person 2	はじめまして！私は最近鹿児島から引っ越してきたばかりで仕事についてなくて専業主婦です。	I've just recently moved out of the incubator island, not just work for a housewife.	n
person 1	そうなんですね。私はずっと長崎に住んでいるんですが、いずれ上京するつもりです。どちらに引っ越されたんですか。	Well, I've been living in Iisakiwa for a long time, but which one of you is it?	n
person 2	大阪に引っ越してきました。こちらは美味しい焼き肉屋さんが多くて焼き肉が大好物なわたしにはピッタリの場所でした。	We moved to Osgiliath, and this place was burned with lots of meat, and I liked it very much.	n
person 1	焼肉いいですね。私は人付き合いが基本的に苦手で、店員さんとのやりとりも嫌なので、基本的にネットショッピングで全て済ませてしまいます。	I don't like cooking meat, so I don't like it much, but it's all part of the book, and I don't like it very much.	n
person 2	わかります！ネットショッピングは便利ですしね。わたしは香水をプンプン匂わせている人が苦手で近くをすれ違っただけで頭が痛くなり悩みの種です。	I smell like a different type of perfume, but I'm not so familiar with the smell of perfume!	n
person 1	わかります。なんとなく不快ですよね。頭が痛くなるほどなのはお辛いですね。	I don't understand. It's hard to get a headache.	n
person 2	そうなんです。鹿児島ではあまりいなかったのですが大阪では香水をつけている人が多くて参っています。ところでわたし、ピアノを始めようと思っているのですが手が小さくて。	Yeah, well, there are a lot of people who don't think I'm a pediatrician, so, by the way, I'm starting to think I'm going to have a small piano.	n
person 1	私も以前ピアノをやっていました。手を開くトレーニングで十分届くようになりましたよ。	I've been playing piano for a long time, so I'll be able to get my hands open for a few minutes.	n
person 2	ピアノやっていたんですね！手を開くトレーニングがあるなんて初耳です！	You've been playing piano all day and you've never heard of training!	n
