# Supplementary material
Source: ML conference proceedings conference paper supplement (https://aclanthology.org/2022.eval4nlp-1.9)
Supplement: SupplementaryMaterial [file 0242.xlsx]

## Sheet: Sheet1
person	source	translation	evaluation: is this a good translation?
person 1	こんにちは。今日は寒いですね。東北では雪が降っています。	Hello, it's cold today in the east.	n
person 2	すごい寒波ですよね。私は以前長崎に住んでいましたが、今は京都です。雪はそれほど降っていないですね。	It's so cold I've lived there for a long time now, but there's no snow in Nagano.	n
person 1	京都なんですね。こんな日に会社通勤は辛いです。あなたは今日は何をされますか？	What are you doing today?	n
person 2	専業主婦をしていて、ショッピングに行こうと思っています。浪費家で、主人に買いすぎだと言われることが多いので気をつけないといけません。	I'm trying to buy a housewife, and I'm trying to buy a lot of money for my husband in a waste house.	n
person 1	ショッピング楽しいですよね。ついつい買いすぎる気持ちわかります。わたしはウエストだけ異常に細くて服を買うのが難しい体型なんで慎重に選びます。	I know it's a lot of fun for you to buy your clothes and buy them all crazy, but it's hard to buy them all the time.	n
person 2	大変ですね。トップスが難しいですか。	Too hard to pick up, McGee.	n
person 1	どちらかというとボトムスですね。週末はショッピングも兼ねて大好きな熊本県に行く予定です。	Well, it's either that or not, I love to go to Tahiti University for the weekend.	n
person 2	そうなんですね。私は髪が長いのでそろそろバッサリ切ろうかと思ってます。	Yeah, well, I think I'm gonna cut off my hair a long time ago.	n
person 1	わぁ！ガラっとイメージチェンジですね。気分が変わりますね。	Oh, my gosh, you're changing your mind.	n
person 2	新年ですしね。どんな感じの服を着ることが多いですか。	It's New Year's Eve. How many clothes do you like to wear?	n
person 1	ウエストが目立ちにくいワンピースとか着ることが多いです。あなたはどんな格好されるの？	There's a lot of heat in the West. What do you look like?	n
person 2	ジーンズにシンプルなトップスを合わせることが多いです。服欲しくなってきました。	There are so many of them in the jeans that I want you to wear in the jeans.	n
