# Supplementary material
Source: ML conference proceedings conference paper supplement (https://aclanthology.org/2022.eval4nlp-1.9)
Supplement: SupplementaryMaterial [file 0242.xlsx]

## Sheet: Sheet1
person	source	translation	evaluation: is this a good translation?
person 1	こんにちは。今日は寒いですね。東北では雪が降っています。	Hello. It is cold today, isn't it? It's snowing in Tohoku.	y
person 2	すごい寒波ですよね。私は以前長崎に住んでいましたが、今は京都です。雪はそれほど降っていないですね。	It's been extremely cold. I used to live in Nagasaki, but I'm now living in Kyoto. It hasn't snowed very much yet.	y
person 1	京都なんですね。こんな日に会社通勤は辛いです。あなたは今日は何をされますか？	You live in Kyoto. It is painful to commute to work on a day like this. What are your plans today?	y
person 2	専業主婦をしていて、ショッピングに行こうと思っています。浪費家で、主人に買いすぎだと言われることが多いので気をつけないといけません。	I'm a full-time housewife and I'm thinking of going shopping. I'm a heavy spender so my husband often tells me that I buy too many things, so I'd better be careful.	y
person 1	ショッピング楽しいですよね。ついつい買いすぎる気持ちわかります。わたしはウエストだけ異常に細くて服を買うのが難しい体型なんで慎重に選びます。	Shopping is fun, isn't it? I understand why you feel the need to overspend. I have an unusually small waist so it's hard for me to buy clothes that fit me right, so I am very careful.	y
person 2	大変ですね。トップスが難しいですか。	That sounds tough. Is it hard to find tops?	y
person 1	どちらかというとボトムスですね。週末はショッピングも兼ねて大好きな熊本県に行く予定です。	No, it's more the bottoms. On weekend, I plan to go to Kumamoto Prefecture which is my favorite place, as well doing some shopping.	y
person 2	そうなんですね。私は髪が長いのでそろそろバッサリ切ろうかと思ってます。	That sounds like fun. I'm planning to go get my long hair chopped off soon.	y
person 1	わぁ！ガラっとイメージチェンジですね。気分が変わりますね。	Really?! That will be a huge change. You'll feel like a different person.	y
person 2	新年ですしね。どんな感じの服を着ることが多いですか。	It's almost the New Year. What kind of clothes do you usually wear?	y
person 1	ウエストが目立ちにくいワンピースとか着ることが多いです。あなたはどんな格好されるの？	I often wear a dress which hides my waist. What about you?	y
person 2	ジーンズにシンプルなトップスを合わせることが多いです。服欲しくなってきました。	I usually wear jeans and a simple top. I am starting to feel like I want to go shopping for clothes.	y
