# Supplementary material
Source: ML conference proceedings conference paper supplement (https://aclanthology.org/2022.eval4nlp-1.9)
Supplement: SupplementaryMaterial [file 0243.xlsx]

## Sheet: Sheet1
person	source	translation	evaluation: is this a good translation?
person 1	おはようございます、私は派遣社員をしている者なのですが、普段は何をなっさっているんですか。	Good morning, I work as a temp. What do you normally do?	y
person 2	おはようございます。派遣社員なんですね！わたしは無職なのでお仕事があるなんて羨ましいです。	Good morning. So you are a temp! I'm currently unemployed, and I'm envious you have a job.	y
person 1	いやいや、人と争うのが苦手なので、毎日ノルマに追われてしんどいです。暇な時は何をなさるのですか。	No no, I don't like to compete with others, so it's tough finishing assignments everyday. What do you like to do in your free time?	y
person 2	実は早期退職をして西日本に引っ越してきました。今は新しい土地でたくさんの人と交流するのが楽しいんですよ。	I actually took early retirement and moved to western Japan. I am enjoying meeting lots of new people in my new home.	y
person 1	ゆったりしていていいですね。私は絵を描くのが好きなので、もっとその時間を取れればと思います。	That sounds nice and relaxing. I like to draw, so I wish I could spend more time on that.	y
person 2	絵を描くのがお好きだなんて、ぜひその腕前を拝見したいですね	I would love to see your drawings, if you say, you like to draw.	y
person 1	見せるほどのものではありませんが。趣味などはありますか。	I'm not that good. Do you have any hobbies?	y
person 2	趣味はいろいろありますが一人でするものより誰かと何かをすることのほうが好きなのかも。こう見えても割と社交的なんです。	I have many hobbies, but I prefer to do activities with others rather than doing things on my own. I might not seem that way, but I'm relatively sociable.	y
person 1	すごいですね。私は人付き合いが苦手なので、一人で過ごすことが多いです。	That sounds nice. I'm not good with people, so I tend to spend time on my own.	y
person 2	そうなんですね。なら休日はお一人で絵を描いて過ごすことが多いのですか。	Is that so? Then, do you often spend time alone, drawing on your days off?	y
