# Supplementary material
Source: ML conference proceedings conference paper supplement (https://aclanthology.org/2022.eval4nlp-1.9)
Supplement: SupplementaryMaterial [file 0243.xlsx]

## Sheet: Sheet1
person	source	translation	evaluation: is this a good translation?
person 1	おはようございます、私は派遣社員をしている者なのですが、普段は何をなっさっているんですか。	Good morning, sir, I'm an employee of yours, but normally, what are you doing?	n
person 2	おはようございます。派遣社員なんですね！わたしは無職なのでお仕事があるなんて羨ましいです。	Good morning, sir. I'm an unemployed employee.	n
person 1	いやいや、人と争うのが苦手なので、毎日ノルマに追われてしんどいです。暇な時は何をなさるのですか。	No, no, no, no, no, no, no, no, no, no, no, no, no, no, no, no, no, no, no, no, no, no, no, no, no, no, no, no, no, no, no, no, no, no, no, no, no, no, no, no, no, no, no, no, no, no, no, no, no, no, no, no, no, no, no, no, no, no, no, no, no, no, no, no, no, no, no, no, no, no, no, no, no, no, no, no, no, no, no, no, no, no, no, no, no, no, no, no, no, no, no, no, no, no, no, no, no, no, no, no.	n
person 2	実は早期退職をして西日本に引っ越してきました。今は新しい土地でたくさんの人と交流するのが楽しいんですよ。		n
person 1	ゆったりしていていいですね。私は絵を描くのが好きなので、もっとその時間を取れればと思います。	I think if you like it, you can paint it more time than you like.	n
person 2	絵を描くのがお好きだなんて、ぜひその腕前を拝見したいですね	I like to see that painting.	n
person 1	見せるほどのものではありませんが。趣味などはありますか。	Do you have any hobby to show?	n
person 2	趣味はいろいろありますが一人でするものより誰かと何かをすることのほうが好きなのかも。こう見えても割と社交的なんです。	I have a lot of hobby, but maybe I prefer doing something better than being alone with someone like this.	n
person 1	すごいですね。私は人付き合いが苦手なので、一人で過ごすことが多いです。	That's great because I don't like to spend a lot of time alone.	n
person 2	そうなんですね。なら休日はお一人で絵を描いて過ごすことが多いのですか。	Well, if you do, there are a lot of pictures to spend on a day alone.	n
