# Supplementary material
Source: ML conference proceedings conference paper supplement (https://aclanthology.org/2022.eval4nlp-1.9)
Supplement: SupplementaryMaterial [file 0244.xlsx]

## Sheet: Sheet1
person	source	translation	evaluation: is this a good translation?
person 1	こんにちは。最近鹿児島に引っ越してきて右も左もわからない生活をしています。	Hello. I recently moved to Kagoshima and living there is tough when I don't know where anything is.	y
person 2	大変ですね。私は今北陸に住んでいて、休職中なので、少しゆっくりしています。	That must be tough. I am living in Hokuriku now and taking a leave of absence. I'm taking it easy.	y
person 1	休職中なんですね。ゆっくりすることも大切だと思います。わたしも専業主婦なんで時間に余裕があります。	I see, you are taking time off. I think it is important to relax. I am a full-time housewife, so I also have a lot of time.	y
person 2	お子さんはいらっしゃるのですか。	Do you have any children?	y
person 1	やんちゃな子供が一人いますよ。食べ盛りなんでわたしも好物の焼き肉屋さんに行くことが多いですね。	I have one very active child. We often go to our favorite yakiniku restaurant because he loves to eat and so do I.	y
person 2	焼肉美味しいですよね。私はお寿司が好きなので、最近よく食べにいきますね。	Yakiniku is delicious, isn't it? I often go to eat sushi these days because I love it so much.	y
person 1	お寿司もいいですね。寿司職人って手が大きな人が多いイメージです。わたしは手が小さいのがコンプレックスなので羨ましいですね。	Sushi sounds great. I feel many sushi chefs have big hands. I'm dripping with envy because I am self-conscious about my small hands.	y
person 2	私はこの黒髪の毛量が多くて、剛毛だねって言われてしまいます。お互い辛いですね。	I have such thick black hair, I'm told that my hair is like bristles. We all have our insecurities.	y
person 1	誰にでも身体の気にしている箇所ありますよね。ところで最近香水の匂いが苦手だってことに気づきました。	Everyone has some complex or another. By the way, I recently realized that I don't like the smell of perfume.	y
person 2	どういうきっかけだったんですか。	How did you figure that out?	y
