# Supplementary material
Source: ML conference proceedings conference paper supplement (https://aclanthology.org/2022.eval4nlp-1.9)
Supplement: SupplementaryMaterial [file 0244.xlsx]

## Sheet: Sheet1
person	source	translation	evaluation: is this a good translation?
person 1	こんにちは。最近鹿児島に引っ越してきて右も左もわからない生活をしています。	Hi, I don't even know if I'm moving to a pediatrician island anymore.	n
person 2	大変ですね。私は今北陸に住んでいて、休職中なので、少しゆっくりしています。	I'm a little out of work right now, so I live in the North land for a while.	n
person 1	休職中なんですね。ゆっくりすることも大切だと思います。わたしも専業主婦なんで時間に余裕があります。	I think we have time for a housewife to get some rest and have a nice time at work.	n
person 2	お子さんはいらっしゃるのですか。	Do you have children?	y
person 1	やんちゃな子供が一人いますよ。食べ盛りなんでわたしも好物の焼き肉屋さんに行くことが多いですね。	I have one child with lots of meat in my favorite meat store and lots of meat.	n
person 2	焼肉美味しいですよね。私はお寿司が好きなので、最近よく食べにいきますね。	It's delicious because I love sushi recently.	n
person 1	お寿司もいいですね。寿司職人って手が大きな人が多いイメージです。わたしは手が小さいのがコンプレックスなので羨ましいですね。	It's nice to see you too, too, because there are many people with big arms and I'm jealous of a small, small, small piece of work.	n
person 2	私はこの黒髪の毛量が多くて、剛毛だねって言われてしまいます。お互い辛いですね。	I envy you both with a lot of hair.	n
person 1	誰にでも身体の気にしている箇所ありますよね。ところで最近香水の匂いが苦手だってことに気づきました。	Well, by the way, everyone cares about the smell of perfume lately.	n
person 2	どういうきっかけだったんですか。	I don't know what it was.	n
