# Supplementary material
Source: ML conference proceedings conference paper supplement (https://aclanthology.org/2022.eval4nlp-1.9)
Supplement: SupplementaryMaterial [file 0245.xlsx]

## Sheet: Sheet1
person	source	translation	evaluation: is this a good translation?
person 1	こんにちは。最近はどのようにお過ごしですか？	Hello. How have you been lately?	y
person 2	こんにちは最近餃子作りにはまっていて、得意といえるレベルに達しましたよ。あなたはどのように過ごされていますか？	Hi, I've recently been obsessed with making gyoza. I think I've reached professional level. What have been up to?	y
person 1	餃子作りですか？なんだか嫉妬してしまいますね。わたし、一応は主婦なのに何も得意料理がなくて。	You've been making gyoza, have you? I'm so jealous. Even though I'm a housewife, I don't have any dishes I'm good at.	y
person 2	餃子手間はかかりますが、意外と簡単なのでオススメです。最近ネットばかりしているせいか、姿勢が悪くなってきてしまいました。	There's a lot to do to make gyoza, but it is surprisingly easy. You should give it a try. I think my posture's getting worse because I'm net surfing all the time.	y
person 1	わたしもデスクワークをしていますので、わかります。ストレスが溜まるんですよね。そのせいか、お給料が出たらほとんど浪費して使い切ってしまうんです。	I know what you mean, because I also work at my desk. Sitting all day can be quite stressful. Perhaps that is why I spend too much of my pay on shopping useless things.	y
person 2	わかります。わたし関東に住んでるんですけど、最近仕事以外で家から出たくなくって。ついついスマホやネットばかりしてしまうせいとはわかってるんですけど、やめられないんです。	I totally understand. I live in Kanto, but recently I'm less motivated to leave home outside of work. It's because all l I do is go on my phone or online, and I can't stop!	y
person 1	わたしも、以前は宮崎に住んでいましたが、今は東京近郊です。都会って素敵な方が多いので、負けたくない、お洋服やお化粧品を買っておしゃれにならなくちゃって思うんです。	I used to live in Miyazaki, but now I live just outside Tokyo. There are many attractive people in the city, so I feel I need to compete and I have to buy nice clothes and make up to look more fashionable.	y
person 2	都会は誘惑が多いですよね。わたしは大学院を卒業したのですが、その学歴を全く生かせてないのが最近の悩みなんです。	There are so many temptations in the city. I finished graduate school, but now I worry that I'm not making any use of my degree.	y
person 1	大学院まで卒業なさったなんて、尊敬します。でも、学歴を活かせないって、ご卒業後はどんなお仕事をなさっているんですか？	I respect you for finishing graduate school. You say you're not using your degree. What kind of work have you had after graduating?	y
person 2	今は実家の仕事を手伝っているんです。昔は努力家だったのに今は全く頑張れなくて…。	I'm helping out with my parents' business right now. I used to be hard working, but I can't seem to make much effort these days...	y
