# Supplementary material
Source: ML conference proceedings conference paper supplement (https://aclanthology.org/2022.eval4nlp-1.9)
Supplement: SupplementaryMaterial [file 0245.xlsx]

## Sheet: Sheet1
person	source	translation	evaluation: is this a good translation?
person 1	こんにちは。最近はどのようにお過ごしですか？	Hello. How long have you spent?	n
person 2	こんにちは最近餃子作りにはまっていて、得意といえるレベルに達しましたよ。あなたはどのように過ごされていますか？	Hello. How long have you been in the middle of something so good you've been here?	n
person 1	餃子作りですか？なんだか嫉妬してしまいますね。わたし、一応は主婦なのに何も得意料理がなくて。	I'm jealous of being married to a housewife, but I'm not good at cooking anymore.	n
person 2	餃子手間はかかりますが、意外と簡単なのでオススメです。最近ネットばかりしているせいか、姿勢が悪くなってきてしまいました。	It's easy for a child to get in the way of getting so close to Oslo lately, that's why.	n
person 1	わたしもデスクワークをしていますので、わかります。ストレスが溜まるんですよね。そのせいか、お給料が出たらほとんど浪費して使い切ってしまうんです。	If I had to use that desk, I'd spend most of my time off my desk, too.	n
person 2	わかります。わたし関東に住んでるんですけど、最近仕事以外で家から出たくなくって。ついついスマホやネットばかりしてしまうせいとはわかってるんですけど、やめられないんです。	I don't know, but I live in Kandahar's house recently, and I don't want to leave work anymore, and I don't want to leave work anymore.	n
person 1	わたしも、以前は宮崎に住んでいましたが、今は東京近郊です。都会って素敵な方が多いので、負けたくない、お洋服やお化粧品を買っておしゃれにならなくちゃって思うんです。	I know you don't want to lose a lot of clothes, but I don't want to spend much time in Tokyo, and I don't want to lose my dress.	n
person 2	都会は誘惑が多いですよね。わたしは大学院を卒業したのですが、その学歴を全く生かせてないのが最近の悩みなんです。	Well, there are a lot of gestures in the city that I've graduated school, but I haven't been able to live that in a long time.	n
person 1	大学院まで卒業なさったなんて、尊敬します。でも、学歴を活かせないって、ご卒業後はどんなお仕事をなさっているんですか？	After school, you can't even begin teaching any more, can you?	n
person 2	今は実家の仕事を手伝っているんです。昔は努力家だったのに今は全く頑張れなくて…。	I've been working on my family for a long time now, and I can't help it.	n
