# Supplementary material
Source: ML conference proceedings conference paper supplement (https://aclanthology.org/2022.eval4nlp-1.9)
Supplement: SupplementaryMaterial [file 0246.xlsx]

## Sheet: Sheet1
person	source	translation	evaluation: is this a good translation?
person 1	こんばんは、わたしつい先日早期退職したので今無職なんですよ。	Good evening. I just took my early retirement so I am currently unemployed.	y
person 2	そうなんですか？お時間があって羨ましいですよ。趣味は何かするんですか？	Is that so? It must be nice to have time for yourself. Do you have any hobbies?	y
person 1	結構社交的な性格なので、高齢者の登山サークルに入会してみました。あなたは忙しいのですか？	I am quite outgoing, so I joined a hiking group for the elderly. Are you usually busy?	y
person 2	ええ。高卒で働いていますので、貧乏ヒマ無しというやつです。茶髪でも許してくれる職場なので少し気楽ですが。	Yes, I've been working ever since graduating high school. I have no time for anything but work. But my workplace is pretty relaxing, they allow workers to dye their hair brown.	y
person 1	そうなのですね。わたしは西日本に住んでいるのですがあなたはどちらにお住まいですか？	That's alright. By the way, I live in western Japan, where do you live?	y
person 2	あっ、わりと近いかもしれませんね。奈良在住です。	Oh, we may be rather close. I live in Nara.	y
person 1	お、ご近所さんですね。わたしは大阪なんですよ。茶髪以外にあなたはどんな見た目をしてらっしゃるのですか？ちなみにわたしは髪の毛が短いんです。	Oh, we're practically neighbors. I live in Osaka. Other than your brown hair, what do you look like? I have short hair.	y
person 2	別にこれといった特徴もない、そこらのオッサンですよ。気分屋で、新喜劇の人みたいやなってよく言われるんです。	I have no remarkable features. I look like any other guy on the street. I'm moody and people often say I look like a comedian.	y
person 1	愉快そうな方なのですね。あなたと会ってみたいです。	You sound like a fun person. I would like to meet with you.	y
person 2	それは嬉しいですねえ、今度難波あたりで会いましょう。登山サークルで奈良に来られること、あります？	Happy to hear that, maybe we can meet up around Namba some time. Would you come to Nara with your hiking group?	y
