# Supplementary material
Source: ML conference proceedings conference paper supplement (https://aclanthology.org/2022.eval4nlp-1.9)
Supplement: SupplementaryMaterial [file 0246.xlsx]

## Sheet: Sheet1
person	source	translation	evaluation: is this a good translation?
person 1	こんばんは、わたしつい先日早期退職したので今無職なんですよ。	Good evening, I retired the day I retired from work.	n
person 2	そうなんですか？お時間があって羨ましいですよ。趣味は何かするんですか？	Well, what do you do when you have time?	n
person 1	結構社交的な性格なので、高齢者の登山サークルに入会してみました。あなたは忙しいのですか？	Have you been busy getting into the mountains of the elderly circle?	n
person 2	ええ。高卒で働いていますので、貧乏ヒマ無しというやつです。茶髪でも許してくれる職場なので少し気楽ですが。	Yeah, well, he works in high school so he can forgive me for not having a poor, poor hair.	n
person 1	そうなのですね。わたしは西日本に住んでいるのですがあなたはどちらにお住まいですか？	Well, where do I live in the West Japan?	n
person 2	あっ、わりと近いかもしれませんね。奈良在住です。	Well, maybe it's closer to being with you.	n
person 1	お、ご近所さんですね。わたしは大阪なんですよ。茶髪以外にあなたはどんな見た目をしてらっしゃるのですか？ちなみにわたしは髪の毛が短いんです。	What do I look like when I'm a neighbor, anyway?	n
person 2	別にこれといった特徴もない、そこらのオッサンですよ。気分屋で、新喜劇の人みたいやなってよく言われるんです。	I'm not so happy with this, Sun.	n
person 1	愉快そうな方なのですね。あなたと会ってみたいです。	I'd like to meet you in a very interesting way.	n
person 2	それは嬉しいですねえ、今度難波あたりで会いましょう。登山サークルで奈良に来られること、あります？	It's good to see you in the water field next time, right?	n
