# Supplementary material
Source: ML conference proceedings conference paper supplement (https://aclanthology.org/2022.eval4nlp-1.9)
Supplement: SupplementaryMaterial [file 0247.xlsx]

## Sheet: Sheet1
person	source	translation	evaluation: is this a good translation?
person 1	こんにちは。お元気ですか？	Hello. How are you?	y
person 2	元気です。最近どうですか？	I am fine. How have you been?	y
person 1	いや、それが休職中でしてね。ストレスのせいですよ。ただ、髪が抜けたり、白髪になったりするほどひどくはないんですが。	Well, I'm on leave at the moment. Work has been stressful. It's not that bad, I'm not losing my hair over it or getting grays.	y
person 2	ストレスを甘くみない方がいいですよ。私はこの春大学を卒業しますが、何かとストレスでこの年でも白髪が目立っているんです。	Don't underestimate stress. I am graduating from university this spring, but because of stress I think I have noticeably more gray hair at my age.	y
person 1	そうなんですか！お若いのに大変ですね。わたしは、黒髪で量も多いので、軽症なのかもしれません。ご卒業後の進路は決まっていますか？	Oh my, that's no good. You're still so young! I have thick black hair, so it might be less noticeable for me. Do you know what you’re doing after graduation?	y
person 2	内定は頂いてますが突然断られたりしないか心配です。	Yes, I have a job offer, but I am worried that it might be revoked suddenly.	y
person 1	そうですか。あまり悩まずに、気分転換したほうがいいですよ。旅行なんてどうです？わたしが住んでいる北陸は、お寿司など海の幸がおいしいのでおすすめですよ。	Is that right? Don't worry so much, give yourself a break. What about traveling? The Hokuriku area where I live is highly recommended. You can get delicious fresh seafoods, such as sushi.	y
person 2	そうですね。海の幸いいですね。北陸行ったことがないので行ってみたいです。私は近畿地方に住んでいますが少し飽きてきています。	I see, seafood sounds nice. I've never been to Hokuriku, so I'd like to go there. I live in the Kinki area and I'm getting a little bored here.	y
person 1	近畿地方でしたら、福井県などはすぐですよ！ぜひお越し下さい。わたしも近畿地方に興味がありますが、おすすめの観光地などはありますか？	In the Kinki area, you're very close to Fukui Prefecture! Please come, by all means. I am also interested in the region; do you have any recommendation for sightseeing spots?	y
person 2	そうですね、京都は定番ですがやっぱりいい所だと思います。お休み中はどこか行くんですか？	Well, Kyoto is the obvious place and it's always nice. Where do you usually go on your holiday?	y
person 1	ええ、地元でしたら金沢の兼六園などによく行きますね。京都もいいですね！もうちょっと体調が良くなったら、わたしもぜひ伺いたいと思います。	Locally, I often go to Kenrokuen garden in Kanazawa. Kyoto is also nice! I would love to visit when I'm feeling a little better.	y
person 2	早く体調良くなるといいですね。	Oh, I hope you feel better soon.	y
