# Supplementary material
Source: ML conference proceedings conference paper supplement (https://aclanthology.org/2022.eval4nlp-1.9)
Supplement: SupplementaryMaterial [file 0247.xlsx]

## Sheet: Sheet1
person	source	translation	evaluation: is this a good translation?
person 1	こんにちは。お元気ですか？	Hi. How are you?	y
person 2	元気です。最近どうですか？	How are you doing lately?	n
person 1	いや、それが休職中でしてね。ストレスのせいですよ。ただ、髪が抜けたり、白髪になったりするほどひどくはないんですが。	No, it's just stress, stress, hair, hair, hair, hair, hair.	n
person 2	ストレスを甘くみない方がいいですよ。私はこの春大学を卒業しますが、何かとストレスでこの年でも白髪が目立っているんです。	I'm having a lot of stress in this year, and I'm having a hard time getting my hair kicked out of school.	n
person 1	そうなんですか！お若いのに大変ですね。わたしは、黒髪で量も多いので、軽症なのかもしれません。ご卒業後の進路は決まっていますか？	Am I too young to graduate, because I'm too young to admit it?	n
person 2	内定は頂いてますが突然断られたりしないか心配です。	I'm worried you won't be able to refuse me after all.	n
person 1	そうですか。あまり悩まずに、気分転換したほうがいいですよ。旅行なんてどうです？わたしが住んでいる北陸は、お寿司など海の幸がおいしいのでおすすめですよ。	Well, you shouldn't be so kind as to change your mind, because I live in North Africa.	n
person 2	そうですね。海の幸いいですね。北陸行ったことがないので行ってみたいです。私は近畿地方に住んでいますが少し飽きてきています。	Well, lucky I'm not going to the North Coast, because I'm tired of living near the sea.	n
person 1	近畿地方でしたら、福井県などはすぐですよ！ぜひお越し下さい。わたしも近畿地方に興味がありますが、おすすめの観光地などはありますか？	If there's a Fukuyuu Fukawa tour, I'd be interested in a tour near Fukawa.	n
person 2	そうですね、京都は定番ですがやっぱりいい所だと思います。お休み中はどこか行くんですか？	You think Kyoko is a good place to rest?	n
person 1	ええ、地元でしたら金沢の兼六園などによく行きますね。京都もいいですね！もうちょっと体調が良くなったら、わたしもぜひ伺いたいと思います。	If you'd like to go, I'd like to go to Kashiwada's house for six more days!	n
person 2	早く体調良くなるといいですね。	I think you'll feel better soon.	n
