# Supplementary material
Source: ML conference proceedings conference paper supplement (https://aclanthology.org/2022.eval4nlp-1.9)
Supplement: SupplementaryMaterial [file 0248.xlsx]

## Sheet: Sheet1
person	source	translation	evaluation: is this a good translation?
person 1	こんにちは。元気にしていますか？	Hi. How are you?	y
person 2	はい、元気ですよ！最近はSNSやブログに自分の生活をアップすることにはまっているんです。	I'm fine. I've been working on my own life with SSSSAT and SAT blog recently.	n
person 1	マメなんですね。私は餃子作りが得意ですが作ったものをアップしてみようかな。	Well, I'm good at making things up, but I'm good at making things up.	n
person 2	ぜひそうしてみてください！わたしって自分が大好きなので、なんでも他人に自慢したいんです。自意識過剰って言われることもありますけど、自尊心が高いって言ってほしいですよね。	I want you to do it because I love myself so much, and I'm proud of myself, and I'm proud of myself.	n
person 1	そういう人私の周りにはいないので面白いです。特に自分のどこが自慢ですか？	That's why you're so proud of yourself, isn't it?	n
person 2	実はわたしの周りにもいないので、変わり者扱いされていますよ。四国に住んでいますから、都会的な生活に憧れているんです。わたしの自慢は、茶色に染めたストレートの髪ですね。	In fact, he's not around me, so he lives in four different cities, because I'm very proud to live in four different cities.	n
person 1	ストレートの髪いいですね。私は天パなので毎朝辛いです。私自身の唯一自慢できるのは努力家な所です。	I'm just proud of my hair, straight from the bottom of my hair every morning, because I'm so proud of myself.	n
person 2	そうなんですか？天然パーマの方も、そのままでも魅力的だと思いますよ！努力ってどんなことをしているんですか？	What do you think, the way you do it, the way you do it, the way you do it, the way you do it, the way you do it, the way you do it, you do it?	n
person 1	大学院を卒業するのにすごく勉強したんです。その時一番頑張りました。猫背になり常に姿勢がわるかったです。	I do my best job when I get back to work.	n
person 2	大学院まで出てらっしゃるんですか！わたしは高卒なのでうらやましいです。でも、猫背は気を付けて下さい。写真を撮るときなんかも、背筋を伸ばすだけでかなりきれいに見えますから。	I'm jealous of being out of school, but when I get back to my high school, I'll take a picture of you.	n
person 1	気をつけます。アドバイスありがとうございます。	Careful. Thank you for your advice.	n
person 2	はい、そうしてください。今日はお話しくださってありがとうございました。	Yes, thank you for talking to me today.	n
