# Supplementary material
Source: ML conference proceedings conference paper supplement (https://aclanthology.org/2022.eval4nlp-1.9)
Supplement: SupplementaryMaterial [file 0248.xlsx]

## Sheet: Sheet1
person	source	translation	evaluation: is this a good translation?
person 1	こんにちは。元気にしていますか？	Hello. How are you doing?	y
person 2	はい、元気ですよ！最近はSNSやブログに自分の生活をアップすることにはまっているんです。	I am well! Recently, I am into posting my life on social media and blogs.	y
person 1	マメなんですね。私は餃子作りが得意ですが作ったものをアップしてみようかな。	You must be hard working. I'm good at making gyoza, maybe I should upload photos of my gyoza.	y
person 2	ぜひそうしてみてください！わたしって自分が大好きなので、なんでも他人に自慢したいんです。自意識過剰って言われることもありますけど、自尊心が高いって言ってほしいですよね。	Yes, you should! I love myself, so I want to show myself off to others. People say that I'm overly self-conscious, but I want them to think I have high self-esteem.	y
person 1	そういう人私の周りにはいないので面白いです。特に自分のどこが自慢ですか？	That's interesting. I don't know many people like you. What are you particularly proud of?	y
person 2	実はわたしの周りにもいないので、変わり者扱いされていますよ。四国に住んでいますから、都会的な生活に憧れているんです。わたしの自慢は、茶色に染めたストレートの髪ですね。	Actually, I don't know many around people like me either, so people treat me like I'm strange. I live in Shikoku, so I long to live in the city. My best feature is my straight hair dyed brown.	y
person 1	ストレートの髪いいですね。私は天パなので毎朝辛いです。私自身の唯一自慢できるのは努力家な所です。	I love straight hair. I have naturally curly hair, so it is a lot of work every morning. The only thing I'm proud of is being a hard worker.	y
person 2	そうなんですか？天然パーマの方も、そのままでも魅力的だと思いますよ！努力ってどんなことをしているんですか？	Is that right? I think natural curls are also attractive, just as they are! What did you work hard on?	y
person 1	大学院を卒業するのにすごく勉強したんです。その時一番頑張りました。猫背になり常に姿勢がわるかったです。	I studied really hard to graduate from graduate school. I think I worked my hardest then. As a result, I have always had bad posture.	y
person 2	大学院まで出てらっしゃるんですか！わたしは高卒なのでうらやましいです。でも、猫背は気を付けて下さい。写真を撮るときなんかも、背筋を伸ばすだけでかなりきれいに見えますから。	You have a master's degree! That's wonderful. I'm only finished high school. You should fix your bad posture. Just straightening your back will make you look prettier in photos.	y
person 1	気をつけます。アドバイスありがとうございます。	I will be careful. Thank you for the advice.	y
person 2	はい、そうしてください。今日はお話しくださってありがとうございました。	Yes, please do. Thank you very much for speaking to me today.	y
