# Supplementary material
Source: ML conference proceedings conference paper supplement (https://aclanthology.org/2022.eval4nlp-1.9)
Supplement: SupplementaryMaterial [file 0249.xlsx]

## Sheet: Sheet1
person	source	translation	evaluation: is this a good translation?
person 1	こんにちは！最近はどうですか？	Hello! How's it going?	y
person 2	なんとか風邪も引かず元気です。最近パーマをかけました。あなたは？	I'm well, I've managed to not catch anything. I recently got a perm. How about you?	y
person 1	そうですね。髪には特にこだわりないんですけど、茶髪にはいつもしてるんですよ。	Let's see. It's not that I'm particular about my hair, but I always dyed my hair brown.	y
person 2	一度茶髪にするとずっとそうなりますよね。	Once you start dying your hair, that seems to be the case.	y
person 1	そうなんですよ。わたしは高卒で働き始めたので、あまり髪や服装に厳しくない職場なんです。	That's true. I started working after high school, so my workplace is rather relaxed about our appearance.	y
person 2	いい職場ですね。私は恥ずかしながら高校中退していますが、ラーメンが好きで九州でラーメン屋を経営しています。	That sounds like a nice workplace. I'm embarrassed to say I dropped out of high school, but I like ramen and so I run a ramen shop in Kyushu.	y
person 1	九州なんですか！わたしは奈良に住んでいるんですが、あまりおいしい食べ物がないのでうらやましいですよ。	You're in Kyushu! I live in Nara, and I envy you because there is very little good food here.	y
person 2	奈良なんですか？！修学旅行で一度行きました。確かに食べ物には思い出がないけど、落ち着いた雰囲気で好きですが。普段の会話も標準語ですか？	You are in Nara?! I've been there on a school trip once. I certainly don't have any memories of the food there, but I liked the calm atmosphere. Do you speak standard Japanese?	y
person 1	いやいや、普段は関西弁ですけどね。九州の言葉も温かみがあってわたしは好きですよ。	No, I normally speak with a Kansai dialect. I like the Kyushu dialect as it sounds so warm.	y
person 2	普段は関西弁ですよね、私鈍感ですね。九州弁が温かみがあると初めて言われました。キツいとはよく聞くので。	Right, it's Kansai dialect there. I'm so insensitive. It's my first to hear that Kyushu dialect is warm. I'm often told it's harsh.	y
