# Supplementary material
Source: ML conference proceedings conference paper supplement (https://aclanthology.org/2022.eval4nlp-1.9)
Supplement: SupplementaryMaterial [file 0249.xlsx]

## Sheet: Sheet1
person	source	translation	evaluation: is this a good translation?
person 1	こんにちは！最近はどうですか？	Hello, how are you lately?	y
person 2	なんとか風邪も引かず元気です。最近パーマをかけました。あなたは？	I haven't had a cold in a while, have you?	n
person 1	そうですね。髪には特にこだわりないんですけど、茶髪にはいつもしてるんですよ。	Yeah, well, I don't have much of a hair, but I've always been a cup of chamomma.	n
person 2	一度茶髪にするとずっとそうなりますよね。	It'll be a long time before I get a haircut.	n
person 1	そうなんですよ。わたしは高卒で働き始めたので、あまり髪や服装に厳しくない職場なんです。	Well, I started work in high school so I can't be too hard on my hair, my hair, my hair.	n
person 2	いい職場ですね。私は恥ずかしながら高校中退していますが、ラーメンが好きで九州でラーメン屋を経営しています。	Nice work, but I love ramen who work in Shiite High School	n
person 1	九州なんですか！わたしは奈良に住んでいるんですが、あまりおいしい食べ物がないのでうらやましいですよ。	I'm so jealous of food in Shikoku!	n
person 2	奈良なんですか？！修学旅行で一度行きました。確かに食べ物には思い出がないけど、落ち着いた雰囲気で好きですが。普段の会話も標準語ですか？	Are you sure you don't like it when you go to class, but you don't remember eating at all?	n
person 1	いやいや、普段は関西弁ですけどね。九州の言葉も温かみがあってわたしは好きですよ。	No, I like it when you talk about it in the West, but I like it when you talk.	n
person 2	普段は関西弁ですよね、私鈍感ですね。九州弁が温かみがあると初めて言われました。キツいとはよく聞くので。	You know, I used to say the first thing about the West is that I have a pretty bad feeling about it.	n
