# Supplementary material
Source: ML conference proceedings conference paper supplement (https://aclanthology.org/2022.eval4nlp-1.9)
Supplement: SupplementaryMaterial [file 0250.xlsx]

## Sheet: Sheet1
person	source	translation	evaluation: is this a good translation?
person 1	こんにちは。ちょっと聞いて下さい。最近白髪が目立ち悩んでいるんです。あなたは何か悩みはありますか？	Hello. Will you hear me out? Recently, I am worried about my increasing gray hair. Do you have any concerns?	y
person 2	そうですね。悩みというほどではないかもしれませんが、転職してばかりで日本中を転々としていることが、我ながら気がかりです。もうちょっと同じ仕事を長く続けられないのかなって。	Let me see. It may not be a problem, but I am worried about changing jobs and moving around Japan too often. I'm starting to wonder why I can't stay at the same job a little longer.	y
person 1	いろんな経験が積めそうで私はそういうのいいと思います。私は目鼻だちがはっきりしているのも悩みです。外見の悩みばかりで小さい人間です。	I think that's good because you are gaining a lot of experiences. I'm also concerned about my distinct facial features. I feel as though I'm superficial and have no substance.	y
person 2	外見なんて、気にする必要ありませんよ！他人の外見をあれこれ悪く言う人間は心が小さいんです。その人のほうがおかしいんだと思えば、それで終わりますよ。	You don't have to worry about your looks! People who say negative things on how others look have a small heart. Rest assured it's their problem.	y
person 1	ありがとうございます。救われます。優しい性格なんですね。周りにそう言われませんか？	Thank you. Your words give me comfort. You must be kind, do people say that about you?	y
person 2	優しいでしょうか？初めて言われました。自分では、何でも自分の思い通りにしなければ気が済まない仕切り屋だって思っているんです。	Am I kind? It's the first time that's been said to me. I think that I am a bit controlling, I want everything my way.	y
person 1	そうなんですね、仕切り屋がいないと事が進まないから自分もそんな人が近くにいたらいいなあと思います。日本中転々とおっしゃってましたが私の住む近畿地方も来たことはありますか？	I see, I think it's nice to have a person like you who is an organizer otherwise nothing gets done. You said that you've moved all over Japan, but have you ever been to the Kinki region where I live?	y
person 2	ええ、全国各地に伺っていますから。やっぱり食べ物がおいしいですし、お話しが面白い方が多くて楽しかったですね。	Yes, I have. I've been to various places in the country. The food was delicious and there were many interesting people to talk to so I had fun.	y
person 1	嬉しいです。また来て欲しいです。	I'm glad. I wish you'd come again.	y
person 2	はい、ぜひ伺いたいですね。今はフリーランスで働いていますから、契約先が大阪などだったら行く機会があると思います。	Yes, I would love to visit. I am working freelance now, so I'll have a chance to go if I have a client in Osaka or somewhere.	y
