# Supplementary material
Source: ML conference proceedings conference paper supplement (https://aclanthology.org/2022.eval4nlp-1.9)
Supplement: SupplementaryMaterial [file 0250.xlsx]

## Sheet: Sheet1
person	source	translation	evaluation: is this a good translation?
person 1	こんにちは。ちょっと聞いて下さい。最近白髪が目立ち悩んでいるんです。あなたは何か悩みはありますか？	Hello. Do you have any recent problems lately?	n
person 2	そうですね。悩みというほどではないかもしれませんが、転職してばかりで日本中を転々としていることが、我ながら気がかりです。もうちょっと同じ仕事を長く続けられないのかなって。	Yes, it may be a bit of a problem, but I've been working for Japan for a while now, and it's just a little too long.	n
person 1	いろんな経験が積めそうで私はそういうのいいと思います。私は目鼻だちがはっきりしているのも悩みです。外見の悩みばかりで小さい人間です。	I think there's a lot of experience, but I'm just a little concerned about my nose.	n
person 2	外見なんて、気にする必要ありませんよ！他人の外見をあれこれ悪く言う人間は心が小さいんです。その人のほうがおかしいんだと思えば、それで終わりますよ。	I don't think it's gonna be that bad, but it's gonna take a lot of people to look at that little human face!	n
person 1	ありがとうございます。救われます。優しい性格なんですね。周りにそう言われませんか？	Thank you very much. Aren't you very kind to me?	n
person 2	優しいでしょうか？初めて言われました。自分では、何でも自分の思い通りにしなければ気が済まない仕切り屋だって思っているんです。	I'm sorry, but first of all, I don't think I should worry about what I'm saying.	n
person 1	そうなんですね、仕切り屋がいないと事が進まないから自分もそんな人が近くにいたらいいなあと思います。日本中転々とおっしゃってましたが私の住む近畿地方も来たことはありますか？	If there's no one around here who thinks I'm going to be able to live close to live near Japan, then I'm going to live with my own business.	n
person 2	ええ、全国各地に伺っていますから。やっぱり食べ物がおいしいですし、お話しが面白い方が多くて楽しかったですね。	Yes, I've been having a lot of fun with food around the country.	n
person 1	嬉しいです。また来て欲しいです。	I'm glad you're here again.	n
person 2	はい、ぜひ伺いたいですね。今はフリーランスで働いていますから、契約先が大阪などだったら行く機会があると思います。	***	n
