# Supplementary material
Source: ML conference proceedings conference paper supplement (https://aclanthology.org/2022.eval4nlp-1.9)
Supplement: SupplementaryMaterial [file 0254.xlsx]

## Sheet: Sheet1
person	source	translation	evaluation: is this a good translation?
person 1	hello , how are you today ?	こんにちは、お元気ですか？	y
person 2	i am pretty good ! yourself ?	私はまあまあ元気です！あなたは？	y
person 1	i am doing well . tell me about yourself .	私も元気にしてますよ。 私にあなたのことを教えて下さい。	y
person 2	i enjoy running marathons and watching weird foreign films on netflix . do you have hobbies ?	私はマラソンを走ったり、ネットフリックスで変な外国映画を見るのが好きです。あなたは趣味がありますか？	y
person 1	yes i do . i love eating at restaurants and i love nature .	はい、ありますよ。私はレストランで食事をするのが大好きだし、自然が大好きなんです。	y
person 2	nice ! i personally hate eating out because people in general make me nervous .	良いですね！私は個人的には外食が嫌いなんです、だって他人がいると落ち着かないから。	y
person 1	really ? you have social anxiety .	そうなの？社交不安があるんですね。	y
person 2	yeah , i also do not enjoy social obligations . what do you like about nature ?	はい、それに人付き合いも苦手なんです。自然のどんなところが好きなんですか？	y
person 1	what is your all time favorite color ? i love the overall feel of nature .	あなたの一番お気に入りの色はなんですか？私は自然全体の感じが大好きなんです。	y
person 2	nice ! i like black . you ?	素敵ですね！ 私は黒が好きです。あなたは？	y
person 1	i am a fan of blue .	私は青が好きです。	y
person 2	blue is pretty ! what do you do for a living ?	青はきれいですね！お仕事は何をしてるんですか？	y
person 1	i work full time in an office .	フルタイムでオフィスで働いてます。	y
person 2	me too ! my dad wants me to inherit an appliance store but i do not want it .	私もです！父は私に電器店を継いでほしいんだけど私はやりたくないんですよ。	y
