# Supplementary material
Source: ML conference proceedings conference paper supplement (https://aclanthology.org/2022.eval4nlp-1.9)
Supplement: SupplementaryMaterial [file 0254.xlsx]

## Sheet: Sheet1
person	source	translation	evaluation: is this a good translation?
person 1	hello , how are you today ?	こんにちは、今日はどうですか ？	n
person 2	i am pretty good ! yourself ?	私は元気です、あなた自身 ？	n
person 1	i am doing well . tell me about yourself .	よくやった自分のことを話してくれ	n
person 2	i enjoy running marathons and watching weird foreign films on netflix . do you have hobbies ?	ネット上で映画を見て変な映画を観てるのは楽しいわ	n
person 1	yes i do . i love eating at restaurants and i love nature .	ああレストランで食べるのが好きだ自然が好きなんだ	n
person 2	nice ! i personally hate eating out because people in general make me nervous .	個人的に人が緊張するのが嫌いなんだ	n
person 1	really ? you have social anxiety .	あなたには社会的不安があるのよ	n
person 2	yeah , i also do not enjoy social obligations . what do you like about nature ?	私も社会的な関心はないわ自然はどう ？	n
person 1	what is your all time favorite color ? i love the overall feel of nature .	いつも好きな色は何色 ？	n
person 2	nice ! i like black . you ?	黒人が好きなんだ君は ？	n
person 1	i am a fan of blue .	青のファンだ	n
person 2	blue is pretty ! what do you do for a living ?	青いわね何をしてるの ？	n
person 1	i work full time in an office .	オフィスで仕事をしてたんだ	n
person 2	me too ! my dad wants me to inherit an appliance store but i do not want it .	パパも僕もだよでもいらないよ	n
