# Supplementary material
Source: ML conference proceedings conference paper supplement (https://aclanthology.org/2022.eval4nlp-1.9)
Supplement: SupplementaryMaterial [file 0255.xlsx]

## Sheet: Sheet1
person	source	translation	evaluation: is this a good translation?
person 1	whats going on with you tonight ?	調子はどう？	y
person 2	the night is young and i have many tasks to ponder . whats up with you ?	夜はこれからだし、じっくり考えたい事がたくさんあるんだ。君はどう？	y
person 1	just sitting here thinking how most people bother me	ただ座って、いかにほとんどの人が自分の癇に障るかということを考えてたよ。	y
person 2	i relate . i prefer to be alone . me and my thoughts .	同感だよ。ひとりでいるほうが良いよ。自分と自分の思考だけで。	y
person 1	that is a good quality . . . what things do you need to get done tonight ?	良質な時間だね・・・。今夜終わらせたいのってどんなこと？	y
person 2	i am developing a software code . it robs me of sleep most days .	僕はソフトウェアのコードを開発しているんだ。 そのせいで毎日のように睡眠不足だよ。	y
person 1	i could probably do it for you	僕がやってあげられるかも。	y
person 2	that is a generous offer . what are your qualifications ?	気前の良い申し出だね。どんな技能を持ってるの？	y
person 1	i like to use the computer . . . i can code	コンピューターを使うのが好きだし・・・。コーディングもできるよ。	y
person 2	cool . thanks for the offer , but i am too proud to pass this project off	良いね。申し出はありがたいけど、このプロジェクトを人に渡すのは僕のプライドが許さないよ。	y
person 1	well your loss . . . . man i could go for a hershey bar	それは損したね・・・あーあ、ハーシーのチョコレート一枚でやってあげたのに。	y
person 2	tasty . i could go for a steak .	美味しいよね。 僕ならステーキが良いかな。	y
