# Supplementary material
Source: ML conference proceedings conference paper supplement (https://aclanthology.org/2022.eval4nlp-1.9)
Supplement: SupplementaryMaterial [file 0255.xlsx]

## Sheet: Sheet1
person	source	translation	evaluation: is this a good translation?
person 1	whats going on with you tonight ?	今夜一緒に行くのか ？	n
person 2	the night is young and i have many tasks to ponder . whats up with you ?	夜は若いし、私はたくさんの仕事を持っている私はあなたと一緒に働くために多くを持っているあなたと一緒に ？	n
person 1	just sitting here thinking how most people bother me	ここに座っている人がどれだけ気になるか考えているだけ	n
person 2	i relate . i prefer to be alone . me and my thoughts .	遅れてしまって一人になりたいの私と私の心も	n
person 1	that is a good quality . . . what things do you need to get done tonight ?	それはいい今夜は何をするの ？	n
person 2	i am developing a software code . it robs me of sleep most days .	ソフトウェアコードを開発してるんだずっと寝てたんだ	n
person 1	i could probably do it for you	君のためならできるかも	n
person 2	that is a generous offer . what are your qualifications ?	それは寛大な申し出だ君の能力は ？	n
person 1	i like to use the computer . . . i can code	コンピューターを使うのが好きなんだコードを教えてくれ	n
person 2	cool . thanks for the offer , but i am too proud to pass this project off	申し出には感謝しますが私はこのプロジェクトから抜けるのが楽しみです	n
person 1	well your loss . . . . man i could go for a hershey bar	残念だがバーに行かせてくれ	n
person 2	tasty . i could go for a steak .	おいしいステーキを食べてくるよ	n
