# Supplementary material
Source: ML conference proceedings conference paper supplement (https://aclanthology.org/2022.eval4nlp-1.9)
Supplement: SupplementaryMaterial [file 0331.xlsx]

## Sheet: Sheet1
person	source	translation	evaluation: is this a good translation?
person 1	hi , i have 2 kids and my hubby is a preacher . you ?	こんにちは、私には２人の子供がいて配偶者は牧師です。あなたは？	y
person 2	i work for a library . i do not have any children .	私は図書館で働いています。 子供はいません。	y
person 1	nice . i sell clothes and other items on facebook for a living .	良いですね。私はフェイスブックで洋服やその他の品物を売ることで生計をたてています。	y
person 2	that sounds interesting . how do you find items to sell .	それは面白いですね。売り物はどうやって探すんですか？	y
person 1	garage sales . do you dye your hair ?	ガレージセールです。 あなたは髪を染めてますか？	y
person 2	i do not but i have thought about it .	染めてませんが、やろうかなと思うことはありますよ。	y
person 1	i have curly hair and it is dark thinking of making it blonde .	私の髪はカーリーで色が濃いので、金髪にしようかと思ってます。	n
person 2	i wish i had curly hair . mine is straight and will not hold a curl .	私の髪もカーリーだったら良かったのに。私のは直毛でカールがすぐ取れるんです。	n
person 1	this weekend , i need to clean my house , which i do not like doing .	今週末、家の掃除をしないといけないんですが、苦手なんですよね。	y
person 2	i hate cleaning too . i really hate cleaning the bathroom .	私も掃除は大嫌いです。トイレの掃除が本当に大嫌いです。	y
person 1	i am with you there for sure .	その気持ちは良くわかりますよ。	y
person 2	i have a mountain of laundry to fold and put away .	たたんでしまわないといけない洗濯物が山とあるんです。	y
person 1	you must not have done laundry in a long time since you have no kids ?	お子さんがいないから、しばらく洗濯をしてないんじゃないですか？	y
person 2	it has been awhile . my husband has a lot of clothes .	しばらくしてないですね。私の夫は服をたくさん持っているんです。	y
person 1	some men like to change clothes multiple times a day anyway . lol	１日に何度も着替えたがる人もいますしね。（笑）	y
person 2	yes , some do . do you have any hobbies ?	はい、いますね。なにか趣味はありますか？	y
