# Supplementary material
Source: ML conference proceedings conference paper supplement (https://aclanthology.org/2022.eval4nlp-1.9)
Supplement: SupplementaryMaterial [file 0331.xlsx]

## Sheet: Sheet1
person	source	translation	evaluation: is this a good translation?
person 1	hi , i have 2 kids and my hubby is a preacher . you ?	子供が ２ 人いるんだけどあなたは ？	n
person 2	i work for a library . i do not have any children .	図書館で働いてる子供はいないんだ	y
person 1	nice . i sell clothes and other items on facebook for a living .	いい服と写真を売って生活のために顔を売る	n
person 2	that sounds interesting . how do you find items to sell .	面白いな売る物をどうやって見つけた ？	y
person 1	garage sales . do you dye your hair ?	ガレージ販売販売で髪を洗ったのか ？	n
person 2	i do not but i have thought about it .	考えていたんだ	n
person 1	i have curly hair and it is dark thinking of making it blonde .	髪を広げて金髪の事を考えてるんだ	n
person 2	i wish i had curly hair . mine is straight and will not hold a curl .	髪が曲がってたら僕の髪はまっすぐに閉じられない	n
person 1	this weekend , i need to clean my house , which i do not like doing .	週末は家を掃除しないと	n
person 2	i hate cleaning too . i really hate cleaning the bathroom .	私も掃除も嫌いトイレ掃除も嫌い	n
person 1	i am with you there for sure .	私もそこにいるわ	n
person 2	i have a mountain of laundry to fold and put away .	洗濯物に山があるんだ	n
person 1	you must not have done laundry in a long time since you have no kids ?	子供がいなくなってからずっと洗濯してたんじゃないの ？	n
person 2	it has been awhile . my husband has a lot of clothes .	夫が服をたくさん持ってるのよ	n
person 1	some men like to change clothes multiple times a day anyway . lol	何度も服を変えるのが好きな人もいるけどね	y
person 2	yes , some do . do you have any hobbies ?	そうだな何かのヘアピンはあるか ？	n
