# Supplementary material
Source: ML conference proceedings conference paper supplement (https://aclanthology.org/2022.eval4nlp-1.9)
Supplement: SupplementaryMaterial [file 0332.xlsx]

## Sheet: Sheet1
person	source	translation	evaluation: is this a good translation?
person 1	where can you find freedom ?	自由はどこにあるのかしら？	y
person 2	i think withing the democratic party .	民主党の中にあると思います。	y
person 1	for sure also democrats have limited rights to do what they want .	たしかに。民主党員たちにとっても、やりたいようにやれる権利は限られていますけどね。	y
person 2	why do you feel unfree ?	なぜあなたは不自由だと感じるんですか？	y
person 1	i hate the rules at school , home road and every were .	私は学校や家庭や道路など、どこにいてもルールが大嫌いなんです。	y
person 2	hmm i think some rules are neccessary .	うーん、私はある程度のルールは必要だと思うけどな。	y
person 1	some just make people uncomfortable like me .	私のように、人を不快にさせるだけのルールもあるんですよ。	y
person 2	i have a rule that i only eat fish .	私にも魚だけを食べるというルールがありますよ。	y
person 1	me i cannot make any rule for myself am only there to obey already made ones .	私の場合は、自分自身になにかルールを課すということはできませんね、既成のルールに従うようにしてるだけで。	y
person 2	anyone can make rules they want to live by .	誰でもルールはつくれますよ、それに従って生きていけるような。	y
person 1	my parents told me not to until i get my own home .	私の両親は、私が自分の家を持つまでは自分のルールを作るなと言いましたよ。	y
person 2	parents can be overbearing . mine were both over 6 foot tall .	両親って横柄なときがありますよね。私の両親は二人とも身長が６フィート超だったんですよ。	y
person 1	especially my mum cannot allow me to make any choice .	特に母は私に自己選択させてくれないんです。	y
person 2	do you know why that is ?	それはなぜだか分かる？	y
