# Supplementary material
Source: ML conference proceedings conference paper supplement (https://aclanthology.org/2022.eval4nlp-1.9)
Supplement: SupplementaryMaterial [file 0332.xlsx]

## Sheet: Sheet1
person	source	translation	evaluation: is this a good translation?
person 1	where can you find freedom ?	自由はどこにある ？	y
person 2	i think withing the democratic party .	コンパクトパーティーのことだと思うわ	n
person 1	for sure also democrats have limited rights to do what they want .	彼らがしたいことをする権利もあるのよ	n
person 2	why do you feel unfree ?	なぜ自由に感じるの ？	n
person 1	i hate the rules at school , home road and every were .	学校でルールは嫌いなんだ家や家も何もかもがね	n
person 2	hmm i think some rules are neccessary .	いくつかのルールは非公式だと思うわ	n
person 1	some just make people uncomfortable like me .	私みたいな人を不愉快にさせるだけよ	y
person 2	i have a rule that i only eat fish .	魚しか食べないルールがあるの	n
person 1	me i cannot make any rule for myself am only there to obey already made ones .	自分のルールは自分で決めることしかできない	n
person 2	anyone can make rules they want to live by .	誰でもルールを守りたい人はいる	n
person 1	my parents told me not to until i get my own home .	両親は自分の家に帰るまで自分の家に戻るなと言っていた	n
person 2	parents can be overbearing . mine were both over 6 foot tall .	両親は距離が低すぎて 6 m も下にいたんだ	n
person 1	especially my mum cannot allow me to make any choice .	特に母には選択の余地はない	n
person 2	do you know why that is ?	なぜか分かるか ？	n
