# Supplementary material
Source: ML conference proceedings conference paper supplement (https://aclanthology.org/2022.eval4nlp-1.9)
Supplement: SupplementaryMaterial [file 0346.xlsx]

## Sheet: Sheet1
person	source	translation	evaluation: is this a good translation?
person 1	hey how are you today	今日は元気か ？	y
person 2	i am good . what about you ?	元気よあなたは ？	y
person 1	i am good , just doing some weight lifting this morning	今朝は何か重い物をやってるだけ	n
person 2	cool . my kids got me up early wanting breakfast .	良かった子供たちが朝ごはんを欲しがってた	n
person 1	ahahah my daughter just turned one , so i made her some eggs this morning .	娘が一人になったので今朝卵を作った	n
person 2	yum ! we are planning to go swimming and do some online shopping today . what about you ?	今日は泳いで買い物に行こうかと思って	n
person 1	i am doing training because i am becoming a policeman soon .	警官になるから訓練してるんだ	y
person 2	wow ! sounds great ! i stay home with my kids , but i worked for monsanto before .	いいわね子供たちと家にいるのはいいけど私は前にフロリダで仕事をしてたの	n
person 1	oh cool , that is always great to be with your kids ,	楽しそうだな子供たちと一緒にいてくれて嬉しいよ	n
person 2	yes , i enjoy it . i also like to read . what else do you do ?	ええ楽しんでます他に何をします ？	n
person 1	i watch a ton of mma	ジェサトンを見てる	n
person 2	i see . i like fiction books . mostly fantasy .	そうか小説は好きだほとんど幻想だ	n
person 1	do you like collecting knives	ナイフを集めるのが好きなのか ？	y
person 2	no , not really . i would be afraid my kids would get them when i was not looking .	いや子供が見ていなかった時に子供たちを捕まえるのが怖い	n
