# Supplementary material
Source: ML conference proceedings conference paper supplement (https://aclanthology.org/2022.eval4nlp-1.9)
Supplement: SupplementaryMaterial [file 0346.xlsx]

## Sheet: Sheet1
person	source	translation	evaluation: is this a good translation?
person 1	hey how are you today	やあ、お元気ですか？	y
person 2	i am good . what about you ?	元気です。あなたは？	y
person 1	i am good , just doing some weight lifting this morning	僕は元気です、今朝ちょっとウェイトリフティングをしていたところです。	y
person 2	cool . my kids got me up early wanting breakfast .	良いですね。私は朝食を欲しがる子どもたちに朝早く起こされました。	y
person 1	ahahah my daughter just turned one , so i made her some eggs this morning .	あははは、僕の娘は１歳になったばかりで、今朝は卵料理を作ってあげましたよ。	y
person 2	yum ! we are planning to go swimming and do some online shopping today . what about you ?	美味しそう！今日私たちは泳ぎに行ったり、ネットショッピングをしたりする予定です。あなたは？	y
person 1	i am doing training because i am becoming a policeman soon .	僕はもうすぐ警察官になるのでトレーニングをしているんです。	y
person 2	wow ! sounds great ! i stay home with my kids , but i worked for monsanto before .	あら！凄いですね！私は子どもたちと家にいますが、以前はモンサント社で働いていました。	y
person 1	oh cool , that is always great to be with your kids ,	ああ、良いですね、自分の子供たちと一緒にいられるのは素晴らしいことです。	y
person 2	yes , i enjoy it . i also like to read . what else do you do ?	はい、楽しんでいます。私は読書も好きです。他にご趣味は？	y
person 1	i watch a ton of mma	総合格闘技をたくさん観ます。	y
person 2	i see . i like fiction books . mostly fantasy .	そうなんですね。私はフィクションの本が好きなんです、ほとんどがファンタジーです。	y
person 1	do you like collecting knives	ナイフ収集は好きですか？	y
person 2	no , not really . i would be afraid my kids would get them when i was not looking .	いえ、それほど。私が見ていないときに子どもたちが触ったら怖いわ。	y
