# Supplementary material
Source: ML conference proceedings conference paper supplement (https://aclanthology.org/2022.eval4nlp-1.9)
Supplement: SupplementaryMaterial [file 0349.xlsx]

## Sheet: Sheet1
person	source	translation	evaluation: is this a good translation?
person 1	hi . how is it going ?	こんにちは。元気ですか？	y
person 2	hello ! it is going well . how are you ?	こんにちは！調子良いですよ。あなたは？	y
person 1	i am good . just got back from my yearly trip to disney .	元気です。毎年恒例のディズニーワールドへの旅行から戻ったばかりです。	y
person 2	i have never been to disney , but i have looked up pictures on the internet !	私は一度もディズニーに行ったことがないんですが、インターネットで写真をみたことはありますよ。	y
person 1	it is fun . you have to go !	楽しいですよ。あなたもぜひ行ってみて！	y
person 2	i will ! i am busy with my new job , but one day	そうします！今は新しい仕事で忙しいけど、いつかね。	y
person 1	what do you do ? i am a secretary .	お仕事は何を？私は秘書です。	y
person 2	i make cakes ! what kind of secretary are you ?	私はケーキを作ってます。 どういう種類の秘書なんですか？	y
person 1	i work for an insurance agency .	保険代理店で働いているんです。	y
person 2	that is cool ! do you ever listen to music ?	良いですね！音楽を聴くことはありますか？	y
person 1	i do , mainly indie . you ?	聴きますよ、主にインディーものを。あなたは？	y
person 2	i enjoy indie music , but my favorite is country music	私もインディーミュージックは好きですが、お気に入りはカントリーミュージックです。	y
person 1	i like to listen to country music on occasion .	私もたまにはカントリーミュージックを聴きたくなりますよ。	y
person 2	it is my absolute favorite to listen too while i cook	料理をしながら聴くのに一番のお気に入りなんです。	n
person 1	oh . i enjoy reading crime novels .	なるほど。私は犯罪小説を読むのが好きです。	y
person 2	have you ever read the dresden files ? they are my favorite crime novels	ドレスデン・ファイルは読んだことがありますか？私のお気に入りの犯罪小説です。	y
