# Supplementary material
Source: ML conference proceedings conference paper supplement (https://aclanthology.org/2022.eval4nlp-1.9)
Supplement: SupplementaryMaterial [file 0349.xlsx]

## Sheet: Sheet1
person	source	translation	evaluation: is this a good translation?
person 1	hi . how is it going ?	調子はどう ？	y
person 2	hello ! it is going well . how are you ?	元気だったか ？	n
person 1	i am good . just got back from my yearly trip to disney .	いいよ早朝に仕事から帰ってきた	n
person 2	i have never been to disney , but i have looked up pictures on the internet !	ネットで写真を見たことがないんだ	n
person 1	it is fun . you have to go !	楽しいよ行くんだ ！	n
person 2	i will ! i am busy with my new job , but one day	そうします新しい仕事が忙しくて	n
person 1	what do you do ? i am a secretary .	私は秘書なの	n
person 2	i make cakes ! what kind of secretary are you ?	どんな秘書なんだ ？	n
person 1	i work for an insurance agency .	保険会社の仕事なんだ	n
person 2	that is cool ! do you ever listen to music ?	クールだ音楽聴いたことあるか ？	n
person 1	i do , mainly indie . you ?	そうだ、一時的には死ぬんだ	n
person 2	i enjoy indie music , but my favorite is country music	音楽が好きなんだけど好きな音楽が好きなんだ	n
person 1	i like to listen to country music on occasion .	私は時々音楽を聴いてみたいわ	n
person 2	it is my absolute favorite to listen too while i cook	料理する間に私のお気に入りなの	n
person 1	oh . i enjoy reading crime novels .	犯罪小説を読むのが楽しい	n
person 2	have you ever read the dresden files ? they are my favorite crime novels	ダクデンのファイルを読んだことは ？	n
