# Supplementary material
Source: ML conference proceedings conference paper supplement (https://aclanthology.org/2022.eval4nlp-1.9)
Supplement: SupplementaryMaterial [file 0384.xlsx]

## Sheet: Sheet1
person	source	translation	evaluation: is this a good translation?
person 1	hey , how are you today ?	こんにちは、お元気ですか？	y
person 2	hello , i am fine . how are you ?	こんにちは。私は元気です。あなたは？	y
person 1	good . i just got finished watching some anime .	元気です。アニメを観終わったところです。	y
person 2	no way ! i absolutely love anime , comic books and even cartoons !	マジですか？私もアニメが大好きなんです、コミック本や漫画も！	y
person 1	cool ! i watched it on one of my two laptops .	良いですね！私が持っている２台のノート型パソコンのうちの１台で観ました。	y
person 2	i do that too sometimes while i am playing video games on the big screen .	大きなスクリーンでビデオゲームで遊んでいるときは、私もそうすることがありますよ。	y
person 1	do you have any other hobbies ?	その他に趣味はありますか？	y
person 2	drawing characters from anime . i hope to publish my own someday !	アニメのキャラクターの絵を描くこと。いつか自分のを出版できたら良いな！	y
person 1	cool . after my grandparents died i took over their flower garden .	良いですね。祖父母が亡くなった後に私が彼らの花畑を受け継いだんですよ。	y
person 2	i like flowers and so does my partner .	私はお花が好きだし、私のパートナーもそうです。	y
person 1	oh , are you in a serious relationship ?	あ、あなたは真剣交際中なんですか？	y
person 2	well i am , but my partner is getting mad because she has not met my parents yet .	うーん、そうですね、でもパートナーがまだ私の両親に会ったことがないことで怒り始めているんです。	y
person 1	have you met her parents yet ?	あなたは彼女の両親にもう会ったんですか？	y
person 2	yes , but she is out and i am not . tell me about your relationship .	はい、でも彼女はカムアウトしていて私はしていないですから。あなたの恋愛の話もしてくださいよ。	n
person 1	oh , i see ! i am not in one .	ああ、なるほど！ 私は誰ともつき合ってないです。	y
person 2	well that might be lucky since so many life details get involved .	そうか、それはラッキーかもしれないですよ、色々と生活の細かいところまで関係してくることですし。	y
