# Supplementary material
Source: ML conference proceedings conference paper supplement (https://aclanthology.org/2022.eval4nlp-1.9)
Supplement: SupplementaryMaterial [file 0384.xlsx]

## Sheet: Sheet1
person	source	translation	evaluation: is this a good translation?
person 1	hey , how are you today ?	やあ今日はどうだ ？	n
person 2	hello , i am fine . how are you ?	大丈夫よ元気 ？	y
person 1	good . i just got finished watching some anime .	いいわ見てきたの	n
person 2	no way ! i absolutely love anime , comic books and even cartoons !	私を愛してるわマンガだって大好きよ ！	n
person 1	cool ! i watched it on one of my two laptops .	2 つ目のラップの上で見たんだ	n
person 2	i do that too sometimes while i am playing video games on the big screen .	テレビゲームをしてる間によくやるよ	n
person 1	do you have any other hobbies ?	他にコショウあるか ？	n
person 2	drawing characters from anime . i hope to publish my own someday !	いつか自分の絵を出版したいんだ ！	n
person 1	cool . after my grandparents died i took over their flower garden .	祖父が死んで後は祖父が花園を買ったんだ	n
person 2	i like flowers and so does my partner .	私は花と相棒が好きなの	n
person 1	oh , are you in a serious relationship ?	マジで本気なの ？	n
person 2	well i am , but my partner is getting mad because she has not met my parents yet .	でもまだ両親と会ってないから怒ってるのよ	n
person 1	have you met her parents yet ?	両親に会ったことは ？	y
person 2	yes , but she is out and i am not . tell me about your relationship .	彼女は外に出て君の関係について話してくれ	n
person 1	oh , i see ! i am not in one .	そうか俺は中にはいないんだ	n
person 2	well that might be lucky since so many life details get involved .	多くの詳細な情報が得られて幸運だったかもしれない	n
