# Supplementary material
Source: ML conference proceedings conference paper supplement (https://aclanthology.org/2022.eval4nlp-1.9)
Supplement: SupplementaryMaterial [file 0385.xlsx]

## Sheet: Sheet1
person	source	translation	evaluation: is this a good translation?
person 1	hello there . is not it a great day to adopt a dog ?	犬を養子にするのは楽しい日じゃないのか ？	n
person 2	yes it would be a nice thing to do	そうだな	n
person 1	what are you up to on this fine day ?	今日はどうしますか ？	n
person 2	not much just staying home	家にいるだけじゃなくて	n
person 1	what do you for fun . i enjoy a good violin piece to play .	楽しいのは好きなバイオリンだ	n
person 2	i like to play video games	ビデオゲームがしたいんだ	n
person 1	what genre ? hopefully nothing violent	どんな暴力的なことでも	n
person 2	nah , mostly i play rpg ones	スザンナ、私はほとんどピークを演奏しています	n
person 1	nice . i enjoy eating while gaming myself . have a favorite food ?	よかった、ゲームの後、私は楽しんでいます私は自分の好きな食べ物を持っていますか ？	n
person 2	i like to eat asian food	I like t o eat i t.	n
person 1	i love indian food . it	食べ物が大好きなんだ	n
person 2	i have never tried indian food	食べ物は試したことがない	n
