# Supplementary material
Source: ML conference proceedings conference paper supplement (https://aclanthology.org/2022.eval4nlp-1.9)
Supplement: SupplementaryMaterial [file 0385.xlsx]

## Sheet: Sheet1
person	source	translation	evaluation: is this a good translation?
person 1	hello there . is not it a great day to adopt a dog ?	こんにちは。 今日は犬を引き取るのに最適な日じゃない？	n
person 2	yes it would be a nice thing to do	うん、いいことだとおもうよ。	y
person 1	what are you up to on this fine day ?	こんな晴れの日に君は何をしてるの？	y
person 2	not much just staying home	別に。家にいるだけだよ。	y
person 1	what do you for fun . i enjoy a good violin piece to play .	趣味はなに？私は素敵なバイオリンの曲を弾くのが好きだよ。	y
person 2	i like to play video games	僕はビデオゲームをするのが好き。	y
person 1	what genre ? hopefully nothing violent	どういうジャンルの？暴力的なものじゃないと良いけど。	y
person 2	nah , mostly i play rpg ones	いや、だいたいはロールプレイもので遊んでるよ。	y
person 1	nice . i enjoy eating while gaming myself . have a favorite food ?	良かった。私はゲームをしながら食べるのが好きなんだ。好きな食べ物は？	y
person 2	i like to eat asian food	アジア料理を食べるのが好き。	y
person 1	i love indian food . it	私はインド料理が大好き、かな。	y
person 2	i have never tried indian food	僕はインド料理は試したことがないよ。	y
