# Supplementary material
Source: ML conference proceedings conference paper supplement (https://aclanthology.org/2022.eval4nlp-1.9)
Supplement: SupplementaryMaterial [file 0411.xlsx]

## Sheet: Sheet1
person	source	translation	evaluation: is this a good translation?
person 1	hi there ! how has your night been ?	今晩はどうだった ？	n
person 2	good just working on homework trying to get a teaching degree	宿題で勉強して勉強してただけ	n
person 1	that is great ! i need to pursue a degree . my current lifestyle is getting dull .	それは素晴らしい年を追う必要がある私のライフスタイルは退屈だ	n
person 2	what do you do for a living ?	あなたは何をしてるの ？	y
person 1	i sit on my computer doing data entry all day . otherwise , watching foreign movies and tv .	毎日パソコンに座ってるの外国映画やテレビを見てるだけよ	n
person 2	sounds fun ! i like playing sports and being outdoors .	スポーツ・ゲームが好きなんだ	n
person 1	that sounds exciting ! do you travel ? i love learning about other cultures .	楽しそうだな他の文化について勉強したいんだが	n
person 2	i used to , but i have been in a couple car crashes .	私は慣れていましたが私は車の中にいました	n
person 1	that is unfortunate . i am sorry to hear that . do you speak any other languages ?	それは残念だ他に言語はあるか ？	n
person 2	i do not . do you ? what are your hobbies ?	話せないわあなたのおっぱいは ？	n
person 1	i wish i could ! sadly , i do not have other hobbies than computers , foreign films , and tv .	そうだといいけど・・・宇宙のコンピューターやテレビよりマシなのよ	n
person 2	lol i enjoy crafting and painting .	絵を楽しみにしてる	n
person 1	that sounds fun ! what do you like to paint ?	楽しそうだな絵はどうだ ？	n
person 2	i like painting pictures of animals .	動物の絵が好きなんだ	n
person 1	do you like painting with oil paints ?	イチゴの絵が好きなの ？	n
person 2	i do yes and also acrylics .	はい、それと油圧もです	n
