# Supplementary material
Source: ML conference proceedings conference paper supplement (https://aclanthology.org/2022.eval4nlp-1.9)
Supplement: SupplementaryMaterial [file 0411.xlsx]

## Sheet: Sheet1
person	source	translation	evaluation: is this a good translation?
person 1	hi there ! how has your night been ?	こんばんは！お元気ですか？	n
person 2	good just working on homework trying to get a teaching degree	元気です。宿題に取り組んでいたところです。教職の学位を取ろうとしてるんですよ。	y
person 1	that is great ! i need to pursue a degree . my current lifestyle is getting dull .	それは凄いですね！私も学位を取らないと。今のライフスタイルがつまらなくなってきたんですよ。	y
person 2	what do you do for a living ?	お仕事はなにをなさってるんですか？	y
person 1	i sit on my computer doing data entry all day . otherwise , watching foreign movies and tv .	一日中コンピューターの前に座ってデータエントリーをやってるんです。それ以外は外国映画やテレビを観てます。	y
person 2	sounds fun ! i like playing sports and being outdoors .	楽しそうですね！私はスポーツをしたり、屋外にいることが好きなんです。	y
person 1	that sounds exciting ! do you travel ? i love learning about other cultures .	それは面白そうですね！旅行はしますか？私は外国の文化を学ぶのが大好きなんですよ。	y
person 2	i used to , but i have been in a couple car crashes .	以前はしてましたが、交通事故に２度遭いましてね。	y
person 1	that is unfortunate . i am sorry to hear that . do you speak any other languages ?	それは不運でしたね。お気の毒に。あなたはなにか外国語を話しますか？	y
person 2	i do not . do you ? what are your hobbies ?	いいえ。あなたは？ご趣味はなんですか？	y
person 1	i wish i could ! sadly , i do not have other hobbies than computers , foreign films , and tv .	話せればいいんですけどね！残念ながら、コンピューター、外国映画とテレビ以外の趣味は持ち合わせていないんです。	n
person 2	lol i enjoy crafting and painting .	（笑）私は手芸や絵を描くことが好きです。	y
person 1	that sounds fun ! what do you like to paint ?	楽しそうですね！どんな絵を描くんですか？	y
person 2	i like painting pictures of animals .	動物の絵を描くのが好きです。	y
person 1	do you like painting with oil paints ?	油絵の具で描くのが好きなんですか？	y
person 2	i do yes and also acrylics .	はい、そうです、それにアクリル絵の具も。	y
