# Supplementary material
Source: ML conference proceedings conference paper supplement (https://aclanthology.org/2022.eval4nlp-1.9)
Supplement: SupplementaryMaterial [file 0442.xlsx]

## Sheet: Sheet1
person	source	translation	evaluation: is this a good translation?
person 1	hello , how are you today ?	こんにちは今日はどうですか ？	n
person 2	i am well , just getting ready to go to football practice . tell me about yourself	フットボールの練習の準備ができただけだ自分のことを話してくれ	n
person 1	i do not have time for football . i am a carpenter .	フットボールには時間がない俺は金のペンターだ	n
person 2	i attend college on a scholarship . what do you like to build ?	大学に行くんだ何を作る ？	n
person 1	i build furniture . before that i was enslaved for ten years .	家具を作った 1 0 年前に奴隷制度を作った	n
person 2	enslaved ? tell me more about that !	もっと話してくれ ！	n
person 1	i escaped ! as the firstborn child , i consider it my duty to buy my siblings freedom .	子供が生まれてから逃げたんだ兄弟を自由に買う義務があると思う	n
person 2	wow , that is fascinating ! where were you enslaved ?	どこで奴隷をしてたんだ ？	n
person 1	near the red sea . so now i work with wood , and i paint everything red .	赤の海の近くで仕事をしていてすべてを塗り替えたの	n
person 2	you have had a interesting life !	面白い人生を ！	n
person 1	enough about me ! what about you ?	私のことは十分よあなたはどうなの ？	y
person 2	all i do is eat healthy , workout in hopes i can go pro after college .	私が食べるのは健康だし大学後はプロになりたいって願ってるの	n
person 1	those are very good goals . good for you !	それは実にいいゴールだお前のために ！	n
person 2	i hope you can make enough painting things red to buy your siblings freedom !	兄弟を自由にするために絵を描けばいいのに ！	n
person 1	i hope so too . i paint everything red because i love red so much .	私もそう願ってるわ赤い物を描いたから	n
person 2	lol . . . is there anything else you are passionate about ?	他に何かある ？	n
