# Supplementary material
Source: ML conference proceedings conference paper supplement (https://aclanthology.org/2022.eval4nlp-1.9)
Supplement: SupplementaryMaterial [file 0442.xlsx]

## Sheet: Sheet1
person	source	translation	evaluation: is this a good translation?
person 1	hello , how are you today ?	こんにちは、元気かい？	y
person 2	i am well , just getting ready to go to football practice . tell me about yourself	元気です、僕はアメフトの練習に行く準備をしてるところです。あなたのことを教えて下さい。	y
person 1	i do not have time for football . i am a carpenter .	俺にはアメフトをする時間はないな。俺は大工なんだよ。	y
person 2	i attend college on a scholarship . what do you like to build ?	僕は奨学金で大学に行ってるんです。どんなものを作るのが好きなんですか？	y
person 1	i build furniture . before that i was enslaved for ten years .	家具を作ってるよ。その前は10年間奴隷労働をしていたよ。	y
person 2	enslaved ? tell me more about that !	奴隷労働？詳しく聞かせてくださいよ！	y
person 1	i escaped ! as the firstborn child , i consider it my duty to buy my siblings freedom .	逃げ出したんだ！俺は長男として、きょうだいに自由を買い与えることが自分の義務だと思ってる。	y
person 2	wow , that is fascinating ! where were you enslaved ?	うわー、信じられない！どこで奴隷労働してたんですか？	y
person 1	near the red sea . so now i work with wood , and i paint everything red .	紅海の近くで。だから今、木材を扱うときは全部赤く塗るんだよ。	y
person 2	you have had a interesting life !	興味深い人生を送ってきたんですね！	y
person 1	enough about me ! what about you ?	俺の話はこれくらいにしておこう！君はどうなんだ？	y
person 2	all i do is eat healthy , workout in hopes i can go pro after college .	僕がすることといったら、大学卒業後プロにいけることを願って健康的な食事をして、体を鍛えるだけです。	y
person 1	those are very good goals . good for you !	とても良い目標だな、君にとって良いことだ！	y
person 2	i hope you can make enough painting things red to buy your siblings freedom !	あなたがご兄弟に自由を買ってあげられるぐらいたくさんのものを赤く塗れるよう願っています！	n
person 1	i hope so too . i paint everything red because i love red so much .	俺もそう願ってるよ。俺は赤が大好きすぎて、全部赤に塗ってるんだけどな。	y
person 2	lol . . . is there anything else you are passionate about ?	（笑）・・・。その他にあなたが打ち込んでいることはありますか？	y
