# Supplementary material
Source: ML conference proceedings conference paper supplement (https://aclanthology.org/2022.eval4nlp-1.9)
Supplement: SupplementaryMaterial [file 0444.xlsx]

## Sheet: Sheet1
person	source	translation	evaluation: is this a good translation?
person 1	hi . nice to chat . i grew up on a farm . how about you ?	こんにちは。チャットできて嬉しいです。私は農家で育ちました。あなたはどうですか？	y
person 2	i am new to new york . where do you live ?	私はニューヨークに最近やって来ました。あなたはどこに住んでいますか？	y
person 1	i am in pennsylvania . its pretty cold here in the winters . do you like ny ?	ペンシルバニアに住んでます。ここは冬の間かなり寒いです。ニューヨークは気に入りましたか？	y
person 2	not really . i am from the midwest and prefer it . i do not like the snow .	そうでもないです。私は中西部出身でそっちの方が良いです。雪は好きじゃないんです。	y
person 1	me neither since i have fibromyalgia . the cold really hurts my hands .	私も。私は線維筋痛症なので。寒さで手がひどく痛むんです。	y
person 2	i have a mobility problem , so when it snows i do not go out , afraid of falling	私には移動が難しいので、雪が降ったら外出しませんよ、転ぶのが怖いから。	y
person 1	what do you like to do ? i love to read especially when its cold outside .	趣味はなんですか？私は読書するのが大好きです、とくに外が寒いときには。	y
person 2	i like to read as well . i have 3 grandsons and love being with them	私も読書は好きです。私には孫息子が3人いるので、孫たちと過ごすのが大好きです。	y
person 1	wow . that sounds wonderful . what do you do with them ? ever do beadwork ?	わあ。それは素晴らしいですね。みんなと一緒になにをするんですか？ビーズ細工をすることはありますか？	y
person 2	i usually read to them or play games . i have not done beadwork . do you ?	普段は読み聞かせをしたりゲームで遊びます。ビーズ細工はやったことないですね。あなたは？	y
person 1	i love it . if i had a granddaughter i could teach her .	大好きなんです。私に孫娘がいたら、教えてあげられたのに。	y
person 2	do not think the grandsons would be interested in beadwork . . lol	うちの孫息子たちがビーズ細工に興味をもつとは思えないわ・・・（笑）。	y
person 1	no not at all . i make my own patterns with it . what else do you do ?	まったくね。私は独自のデザインでビーズ細工をするんです。他にはどんなことをなさいますか？	y
person 2	i enter sweepstakes for a hobby , i have won 2 cars ! !	私は趣味で懸賞に応募するんですが、車２台当たったことがあるんですよ！！	y
person 1	wow ! that is exciting ! i do not think i have ever won a sweepstakes !	おお！それは嬉しいですね！私は一度も懸賞が当たったことはなかったと思います！	n
person 2	its alot fun , i have a daily ritual that i do	すごく楽しいですよ。毎日する習慣なんです。	y
person 1	well it was nice chatting with you .	ともあれ、あなたとチャットできて楽しかったです。	y
person 2	same here have a nice weekend	こちらこそ。良い週末を。	y
