# Supplementary material
Source: ML conference proceedings conference paper supplement (https://aclanthology.org/2022.eval4nlp-1.9)
Supplement: SupplementaryMaterial [file 0444.xlsx]

## Sheet: Sheet1
person	source	translation	evaluation: is this a good translation?
person 1	hi . nice to chat . i grew up on a farm . how about you ?	農場で育ったんだ君は ？	n
person 2	i am new to new york . where do you live ?	新しいトークに住んでるんだ	n
person 1	i am in pennsylvania . its pretty cold here in the winters . do you like ny ?	私はペンシルバニアよここは寒いの好き ？	n
person 2	not really . i am from the midwest and prefer it . i do not like the snow .	私は中西部から来たの雪が嫌いなの	n
person 1	me neither since i have fibromyalgia . the cold really hurts my hands .	私も嫌いな時は冷たい手を痛めたわ	n
person 2	i have a mobility problem , so when it snows i do not go out , afraid of falling	私には問題があるだから外に出ないと怖い	n
person 1	what do you like to do ? i love to read especially when its cold outside .	外が寒い時に読むのが好きなんだ	n
person 2	i like to read as well . i have 3 grandsons and love being with them	私も読んでみたい 3 人の孫と恋をしてる	n
person 1	wow . that sounds wonderful . what do you do with them ? ever do beadwork ?	楽しそうだな何してるんだ ？	n
person 2	i usually read to them or play games . i have not done beadwork . do you ?	いつも読んでたゲームとかゲームはやってないよな ？	n
person 1	i love it . if i had a granddaughter i could teach her .	孫ができたらいいのに	n
person 2	do not think the grandsons would be interested in beadwork . . lol	孫はビリに興味がないと思うなよ	n
person 1	no not at all . i make my own patterns with it . what else do you do ?	いいえ自分でパターンを作ってるの他に何をしてるの ？	n
person 2	i enter sweepstakes for a hobby , i have won 2 cars ! !	趣味のために入ってきたんだ車 ２ 台勝ったんだぞ ！	n
person 1	wow ! that is exciting ! i do not think i have ever won a sweepstakes !	ワクワクするぜこんなの初めてだぜ ！	n
person 2	its alot fun , i have a daily ritual that i do	楽しいわね毎日儀式があるの	n
person 1	well it was nice chatting with you .	あなたと話せて良かったわ	n
person 2	same here have a nice weekend	週末も素敵だったわ	n
