# Supplementary material
Source: ML conference proceedings conference paper supplement (https://aclanthology.org/2022.eval4nlp-1.9)
Supplement: SupplementaryMaterial [file 0476.xlsx]

## Sheet: Sheet1
person	source	translation	evaluation: is this a good translation?
person 1	hi , how are you doing ?	やあ元気か ？	y
person 2	good thanks what are you up to today ?	今日は何に感謝してるの ？	n
person 1	i am waiting tables at a restaurant .	レストランで待ってる	n
person 2	oh perhaps i know the owner which restaurant is it ?	どのレストランのオーナーか知ってるかな ？	n
person 1	it is steak n shake .	ステーキの握手だ	n
person 2	ah nice i know the owner , bill .	オーナーを知ってるよ	n
person 1	i have met bill once . he seems like a nice guy .	以前会ったことがあるいい人みたいだな	n
person 2	very talented guy he and i both own mansions that we do not live in !	彼と私は両方の生活に生きていないという才能を持っています ！	n
person 1	is there anyone living in them ?	誰か住んでいますか ？	n
person 2	no , not at the moment . business takes up a lot of my time	今は仕事じゃない時間がかかりすぎた	n
person 1	what business are you in ?	何の仕事をしてるんだ ？	y
person 2	tech mainly an international discipline so name it , and i am in it .	国際的な規律を守るために名前と名前を書いてあるそれに乗っている	n
person 1	i have a couple classes online , so i am on the computer for that .	ネットクラスがあるからコンピューターでやってるんだ	y
person 2	where are you for school ?	学校はどこ ？	y
person 1	i am at university of michigan .	私は大学にいます	n
person 2	how are your parents handling your absence ?	ご両親はお邪魔でも ？	n
