# Supplementary material
Source: ML conference proceedings conference paper supplement (https://aclanthology.org/2022.eval4nlp-1.9)
Supplement: SupplementaryMaterial [file 0476.xlsx]

## Sheet: Sheet1
person	source	translation	evaluation: is this a good translation?
person 1	hi , how are you doing ?	こんにちは、お元気ですか？	y
person 2	good thanks what are you up to today ?	おかげさまで。今日はなにしてるの？	y
person 1	i am waiting tables at a restaurant .	私はレストランでウェイトレスをしているんです。	y
person 2	oh perhaps i know the owner which restaurant is it ?	おっ、オーナーを知ってるかもしれない。どのレストラン？	y
person 1	it is steak n shake .	ステーキ・アンド・シェイクです。	y
person 2	ah nice i know the owner , bill .	あー良かった。オーナーを知ってるよ、ビルだ。	y
person 1	i have met bill once . he seems like a nice guy .	ビルには一度だけ会ったことがあります。いい人そうでした。	y
person 2	very talented guy he and i both own mansions that we do not live in !	とても才覚のある男だよ。彼も私も豪邸を持っているんだ、そこに住んではいないけどね！	y
person 1	is there anyone living in them ?	そこには誰かが住んでいるんですか？	y
person 2	no , not at the moment . business takes up a lot of my time	いや、今のところは誰も。私はビジネスでとても忙しくてね。	y
person 1	what business are you in ?	どんなビジネスをなさってるんですか？	y
person 2	tech mainly an international discipline so name it , and i am in it .	主にテック系の国際規約だけど、なんでもやってるよ。	y
person 1	i have a couple classes online , so i am on the computer for that .	私はオンラインで２つクラスを取っているんですが、コンピューターを使ってやってるんです。	y
person 2	where are you for school ?	どこの学校にいるの？	y
person 1	i am at university of michigan .	ミシガン大です。	y
person 2	how are your parents handling your absence ?	君のご両親は君の巣立ちにどう対応してる？	n
