# Supplementary material
Source: ML conference proceedings conference paper supplement (https://aclanthology.org/2022.eval4nlp-1.9)
Supplement: SupplementaryMaterial [file 0479.xlsx]

## Sheet: Sheet1
person	source	translation	evaluation: is this a good translation?
person 1	hello , how are you ? its a nice day today .	こんにちは今日は元気ですか ？	n
person 2	i am good thanks for asking	頼んでくれてありがとう	n
person 1	omar is my name . what is yours ?	クマールは俺の名前だお前の名前は ？	n
person 2	my name is marie anne	私の名前はリプリー	n
person 1	i own a farm in ohio .	私はオハイオの農場を所有しています。	n
person 2	so you must love animals ?	だから、動物を愛する必要がありますか ？	n
person 1	i do . i have sheep , goats and some horses .	そうよ羊と馬がいるの	n
person 2	what city are you from ?	君はどこから来たんだ ？	n
person 1	the closest city to me is miles away . i have never been to a big city .	俺にとって一番近い街は街を離れたことがない	n
person 2	that must be very peaceful	とても平和的だわ	y
person 1	it is . i love it . are you from a big city ?	愛してるわあなたは大都市から来たの ？	n
person 2	yes i am . i am in la	そうよ私はヨーラよ	n
