# Supplementary material
Source: ML conference proceedings conference paper supplement (https://aclanthology.org/2022.eval4nlp-1.9)
Supplement: SupplementaryMaterial [file 0479.xlsx]

## Sheet: Sheet1
person	source	translation	evaluation: is this a good translation?
person 1	hello , how are you ? its a nice day today .	こんにちは。お元気ですか？今日はいい天気です。	y
person 2	i am good thanks for asking	おかげさまで元気です。	y
person 1	omar is my name . what is yours ?	僕の名前はオマーです。あなたは？	y
person 2	my name is marie anne	私の名前はマリー・アンです。	y
person 1	i own a farm in ohio .	僕はオハイオに農場を持っています。	y
person 2	so you must love animals ?	ということは、あなたは動物好きなんでしょうね？	y
person 1	i do . i have sheep , goats and some horses .	はい。羊、ヤギ、それに馬が数頭いますよ。	y
person 2	what city are you from ?	どこの街のご出身ですか？	y
person 1	the closest city to me is miles away . i have never been to a big city .	一番近い街でも何マイルも離れてるんですよ。大きな街には一度も行ったことがないんです。	y
person 2	that must be very peaceful	とても平和でしょうね。	y
person 1	it is . i love it . are you from a big city ?	はい、大好きです。 あなたは都会のご出身ですか？	y
person 2	yes i am . i am in la	はい、そうです。 私はロサンゼルスにいます。	y
