# Supplementary material
Source: ML conference proceedings conference paper supplement (https://aclanthology.org/2022.eval4nlp-1.9)
Supplement: SupplementaryMaterial [file 0507.xlsx]

## Sheet: Sheet1
person	source	translation	evaluation: is this a good translation?
person 1	hello hope you are having a great day . just reading the new york times	こんにちは今日は最高の一日を過ごしたいだけなんだ	n
person 2	i am good ! i am doing the same , reading about ways to save money for college	大学の資金のためにも読んでいる	n
person 1	my father works for the times as a journalist . are you going to college ?	父は記者として働いている大学に行くのか ？	n
person 2	i am saving money for that at the moment ! but now no , i just surf	今はお金を救ってるけど今はちょっとだけ	n
person 1	my older sister mary is in college .	姉が大学にいるんだ	n
person 2	that is cool . what is she studying	いいわね勉強してるのよ	n
person 1	surfing sounds fun . i cant do that in texas . she studies history	サーフィンは楽しそうだけど彼女はメールの中で歴史を研究してるの	n
person 2	it is really fun , but i think i prefer snowboarding . i like snow	楽しいけど私は雪が好きなの雪が好きなの雪が好きなの雪が好きなの	n
person 1	i do not like the cold i was a premature birth and have trouble staying warm	寒い時期に生まれてくるのが嫌なのは嫌なの	n
person 2	oh the same as robert deniro , my favorite actor	私のお気に入りの俳優のシャベールと同じね	n
person 1	i like deniro too . where are you from ?	俺もだどこから来たんだ ？	n
person 2	i am from florida ! i am moving soon	フロリダから来たんだすぐ移動する	n
person 1	where are you moving too ?	お前もどこへ行くんだ ？	y
person 2	to canada ! 6 months of summer and 6 months of snow seems lovely	夏の ６ ヶ月と ６ ヶ月の雪のようだ	n
person 1	i hope you like it . will you be able to surf there	好きなようになりたいけどフロリダのような場所はありません	n
person 2	i am sure there are places to do it , but nothing like florida	でもフロリダみたいなものはありません	n
