# Supplementary material
Source: ML conference proceedings conference paper supplement (https://aclanthology.org/2022.eval4nlp-1.9)
Supplement: SupplementaryMaterial [file 0507.xlsx]

## Sheet: Sheet1
person	source	translation	evaluation: is this a good translation?
person 1	hello hope you are having a great day . just reading the new york times	こんにちは。良い１日をお過ごしだと良いですね。ニューヨーク・タイムズを読んでいたところです。	y
person 2	i am good ! i am doing the same , reading about ways to save money for college	私は元気です！同じく私も大学資金を貯める方法を読んでいます。	y
person 1	my father works for the times as a journalist . are you going to college ?	僕の父はジャーナリストとしてタイムズ社で働いているんですよ。あなたは大学に行くんですか？	y
person 2	i am saving money for that at the moment ! but now no , i just surf	今はそのためにお金を貯めているんです！なので今のところは違いますね、サーフィンをしてるだけです。	y
person 1	my older sister mary is in college .	僕の姉のメアリーは大学に行ってますよ。	y
person 2	that is cool . what is she studying	それは良いですね。なんの勉強をしているんですか？	y
person 1	surfing sounds fun . i cant do that in texas . she studies history	サーフィンは楽しそうですね。テキサスではできませんよ。姉は歴史の研究をしてるんです。	y
person 2	it is really fun , but i think i prefer snowboarding . i like snow	とっても楽しいですよ、スノーボードのほうが好きかもしれないですけど。雪が好きなんです。	y
person 1	i do not like the cold i was a premature birth and have trouble staying warm	僕は寒いのは好きじゃないです。未熟児として生まれたので、体温を保つのが難しいんです。	y
person 2	oh the same as robert deniro , my favorite actor	ああ、私のお気に入りの俳優、ロバート・デ・ニーロと同じですね。	y
person 1	i like deniro too . where are you from ?	僕もデ・ニーロが好きです。あなたはどこの出身ですか？	y
person 2	i am from florida ! i am moving soon	フロリダ出身です！もうすぐ引っ越しますよ。	y
person 1	where are you moving too ?	どこに引っ越すんですか？	y
person 2	to canada ! 6 months of summer and 6 months of snow seems lovely	カナダに！６ヶ月の夏と６ヶ月の雪は魅力的な気がして。	y
person 1	i hope you like it . will you be able to surf there	気に入るといいですね。そっちでもサーフィンできるんですか？	y
person 2	i am sure there are places to do it , but nothing like florida	きっとできる場所があるとは思うけど、フロリダとは比べ物にならないですね。	y
