# Supplementary material
Source: ML conference proceedings conference paper supplement (https://aclanthology.org/2022.eval4nlp-1.9)
Supplement: SupplementaryMaterial [file 0508.xlsx]

## Sheet: Sheet1
person	source	translation	evaluation: is this a good translation?
person 1	hi how ar you doing	元気か ？	y
person 2	i am tired but good . how are you ?	疲れているが元気か ？	n
person 1	i am goof though my husband passed early this year	夫は今年早く亡くなった	n
person 2	i am so sorry to hear that !	それは残念だわ	n
person 1	yeah its been a tough year	ええ辛い年だったわ	n
person 2	what do you do to feel better ?	気分はどう ？	n
person 1	i like to take pictures and travel	写真と旅行が好き	y
person 2	that is cool ! i listen to music to feel better . up is my favorite .	いい曲だ気分が良くなってきた	n
person 1	they are good i want to do photography for a living	写真を撮るのが上手なんだ	n
person 2	yeah ? i work at a researcher .	研究室で働いてる	n
person 1	what kinds of things do you reasearch	何を探してるんだ ？	n
person 2	only the best stuff ever , french fries !	今までで最高の物だけだ、レンチ ！	n
person 1	that would be such a cool job	それはとてもクールな仕事だ	y
person 2	i work at del taco so we are going to have designer fries on the menu soon !	私は、タマネギで働いているので、私たちはすぐにメニューでのシェフを持っているだろう ！	n
