# Supplementary material
Source: ML conference proceedings conference paper supplement (https://aclanthology.org/2022.eval4nlp-1.9)
Supplement: SupplementaryMaterial [file 0508.xlsx]

## Sheet: Sheet1
person	source	translation	evaluation: is this a good translation?
person 1	hi how ar you doing	こんにちは、お元気ですか？	y
person 2	i am tired but good . how are you ?	ちょっと疲れてるけど元気です。あなたは？	y
person 1	i am goof though my husband passed early this year	元気なんですが、今年の初めに夫が亡くなったんです。	y
person 2	i am so sorry to hear that !	それはご愁傷様です！	y
person 1	yeah its been a tough year	ええ、今年はキツい年ですね。	y
person 2	what do you do to feel better ?	気晴らしにどんなことをしていますか？	y
person 1	i like to take pictures and travel	私は写真を撮ったり旅行したりするのが好きなんです。	y
person 2	that is cool ! i listen to music to feel better . up is my favorite .	それは素敵ですね！僕は気晴らしに音楽を聴きますよ。僕のお気に入りはU2です。	y
person 1	they are good i want to do photography for a living	彼らは良いですね。私は仕事として写真をやりたいんですよ。	n
person 2	yeah ? i work at a researcher .	ほんとうに？僕は研究者として働いてます。	y
person 1	what kinds of things do you reasearch	どんなことを研究しているんですか？	y
person 2	only the best stuff ever , french fries !	史上最高のもの、フライドポテトについて！	n
person 1	that would be such a cool job	とっても面白そうな仕事ですね。	y
person 2	i work at del taco so we are going to have designer fries on the menu soon !	僕はデルタコで働いていて、もうすぐメニューに他とは違うフライドポテトを加える予定なんです。	y
