# Supplementary material
Source: ML conference proceedings conference paper supplement (https://aclanthology.org/2022.eval4nlp-1.9)
Supplement: SupplementaryMaterial [file 0510.xlsx]

## Sheet: Sheet1
person	source	translation	evaluation: is this a good translation?
person 1	hello . i am josh . whats your name ?	こんにちはトトロですお名前は ？	n
person 2	hey josh my name is ashley . how are you doing today ?	私の名前はアシュリー今日はどう ？	n
person 1	i am great . tell me about yourself . hobbies ?	君のことを話してくれないか ？	n
person 2	i love going out the farm because i am a total country girl	農場は大好きだなぜなら俺は田舎の女の子だからだ	n
person 1	that is sounds fun . i love riding my motorcycle . you ride ?	楽しそうだバイクに乗るのが好きなんだ	n
person 2	no not at all . driving trucks are my thing . where are you from	違うトラックはどこから来たんだ ？	n
person 1	i am from new york , but now live in virginia . you ?	私はニューヨーク出身だけど今はどこに住んでるの ？	n
person 2	i am from kansas born and raised .	私はカンザス生まれで育ったの	y
person 1	never been there . whats your occupation . i am in construction . cleaning gutters .	ここには来たことないわ私は建設現場にいるの掃除係よ	n
person 2	i tend to the animals on the farm , particularly the chicken . they are my favorite .	動物を農場に入れよう特にチキンは好きなんだ	n
person 1	cool . have you ever tried archery ? i am constantly at our archery center .	クールにやったことある ？	n
person 2	no my vision is horrible lol . that sounds really fun though .	私のビジョンは恐ろしいものじゃないけど楽しそうだわ	n
person 1	oh sorry about your vision . whats your favorite food ?	ビジョンのことは残念だ好きな食べ物は ？	n
person 2	its cool , um pizza is my ultimate favorite because i can eat it anytime of the day .	ピザは最高の好物だいつでも食べられるから	n
