# Supplementary material
Source: ML conference proceedings conference paper supplement (https://aclanthology.org/2022.eval4nlp-1.9)
Supplement: SupplementaryMaterial [file 0510.xlsx]

## Sheet: Sheet1
person	source	translation	evaluation: is this a good translation?
person 1	hello . i am josh . whats your name ?	こんにちは。僕はジョッシュ、君の名前は？	y
person 2	hey josh my name is ashley . how are you doing today ?	こんにちは、ジョッシュ。私の名前はアシュリーだよ。元気？	y
person 1	i am great . tell me about yourself . hobbies ?	元気だよ。君について聞かせてよ。趣味はある？	y
person 2	i love going out the farm because i am a total country girl	私はもろカントリーガールだから、農場に行くのが大好き。	y
person 1	that is sounds fun . i love riding my motorcycle . you ride ?	楽しそうだね。僕はバイクに乗るのが大好きだよ。君も乗る？	y
person 2	no not at all . driving trucks are my thing . where are you from	ううん、全然。トラックを運転するのは得意だけどね。どこ出身？	y
person 1	i am from new york , but now live in virginia . you ?	ニューヨーク出身だけど今はバージニアに住んでるよ。君は？	y
person 2	i am from kansas born and raised .	私は生まれも育ちもカンザスだよ。	y
person 1	never been there . whats your occupation . i am in construction . cleaning gutters .	行ったことないなあ。仕事は何？僕は工事関係。雨樋をきれいにしたりね。	y
person 2	i tend to the animals on the farm , particularly the chicken . they are my favorite .	私は農場で動物の世話をしているの、特に鶏の。鶏は私のお気に入りだよ。	y
person 1	cool . have you ever tried archery ? i am constantly at our archery center .	良いね。アーチェリーをやったことはある？僕はアーチェリー場でずっとやってるよ。	y
person 2	no my vision is horrible lol . that sounds really fun though .	というか、私は視力が悪いの（笑）。とっても楽しそうだけどね。	y
person 1	oh sorry about your vision . whats your favorite food ?	あー、目が悪いのはかわいそうだね。好きな食べ物はなに？	y
person 2	its cool , um pizza is my ultimate favorite because i can eat it anytime of the day .	気にしないでね。えーっと、いつでも食べられるからピザが一番好き。	n
