# Supplementary material
Source: ML conference proceedings conference paper supplement (https://aclanthology.org/2022.eval4nlp-1.9)
Supplement: SupplementaryMaterial [file 0591.xlsx]

## Sheet: Sheet1
person	source	translation	evaluation: is this a good translation?
person 1	hey there ! do you have any pets ?	こんにちは！ペットはなにか飼ってますか？	y
person 2	i do ! i have a pug . how about you ?	はい！パグを飼ってます。あなたは？	y
person 1	aww ! how cute . what is his name ? i have a poodle named george !	ああー！可愛いですよね。名前はなんですか？私はジョージという名前のプードルを飼ってます。	y
person 2	george is such a classy name ! my dog is named name is corky .	ジョージとはとても上品な名前ですね！私の犬の名前はコーキーです。	y
person 1	that is a cute name . what do you do for work ?	可愛い名前ですね。あなたはどんなお仕事をしてますか？	y
person 2	i work in a mexican restaurant . how about you ?	メキシコ料理のレストランで働いてます。あなたは？	y
person 1	i love mexican food ! i work from home . i really love my job	メキシコ料理大好き！わたしは在宅で働いているんです。自分の仕事にとても満足してますよ。	y
person 2	it is quite good . what do you do for fun ?	それはすごく良いことですね。趣味はなんですか？	y
person 1	i used to work for directv cable company and i hated it ! i love the beach	以前はディレクティービー・ケーブル社で働いていたけど、大嫌いでした！私はビーチに行くのが大好きです。	y
person 2	my favorite thing to do is shopping , but the beach is also fantastic !	私が大好きなのはショッピングに行くことですが、ビーチも素敵ですね！	y
person 1	oh shopping is so fun ! where is your favorite place to shop ?	あー、ショッピングはすごく楽しいですね！どこに買い物に行くのが好きですか？	y
person 2	there is a great mall about an hour from my house but it is worth it !	私の家から一時間くらいのところに大型のモールがあるんですが、行く価値がありますよ！	y
person 1	cool ! i do not live near a big mall .	良いですね！私の近所には大きなモールはないから。	y
person 2	where do you live ? i am in chicago .	どこに住んでいるんですか？私はシカゴに住んでます。	y
person 1	i live in raleigh	私はローリーに住んでます。	y
person 2	what state is that in ?	それってどこの州でしたっけ？	y
