# Supplementary material
Source: ML conference proceedings conference paper supplement (https://aclanthology.org/2022.eval4nlp-1.9)
Supplement: SupplementaryMaterial [file 0591.xlsx]

## Sheet: Sheet1
person	source	translation	evaluation: is this a good translation?
person 1	hey there ! do you have any pets ?	おいペットはいるか ？	y
person 2	i do ! i have a pug . how about you ?	君はどうなんだ ？	n
person 1	aww ! how cute . what is his name ? i have a poodle named george !	可愛い名前だジョージ･ジョージだ ！	n
person 2	george is such a classy name ! my dog is named name is corky .	ジョージは素敵な名前だわ犬の名前はキャップよ	n
person 1	that is a cute name . what do you do for work ?	素敵な名前ね仕事は何してるの ？	n
person 2	i work in a mexican restaurant . how about you ?	メキシコのレストランで働いてるんだ君は ？	n
person 1	i love mexican food ! i work from home . i really love my job	メキシコ料理が大好きなんだ仕事が好きなんだ	n
person 2	it is quite good . what do you do for fun ?	楽しい仕事は何をする ？	n
person 1	i used to work for directv cable company and i hated it ! i love the beach	私は監督会社のために働いていましたそして、私はそれが好きでしたそして、私はそれを海が大好きです ！	n
person 2	my favorite thing to do is shopping , but the beach is also fantastic !	私のお気に入りは買い物が好きですが、ビーチも素晴らしい ！	n
person 1	oh shopping is so fun ! where is your favorite place to shop ?	お買い物は楽しいわお店はどこ ？	n
person 2	there is a great mall about an hour from my house but it is worth it !	私の家から １ 時間後に素晴らしいモールがあるけど価値があるわ ！	n
person 1	cool ! i do not live near a big mall .	大きいモールの近くに住んでないわ	n
person 2	where do you live ? i am in chicago .	どこに住んでるの ？	n
person 1	i live in raleigh	シカゴに住んでる	n
person 2	what state is that in ?	州は何なんだ ？	y
