# Supplementary material
Source: ML conference proceedings conference paper supplement (https://aclanthology.org/2022.eval4nlp-1.9)
Supplement: SupplementaryMaterial [file 0592.xlsx]

## Sheet: Sheet1
person	source	translation	evaluation: is this a good translation?
person 1	hi how is your day ?	今日はどうだった ？	y
person 2	it has been great , how about you	最高だったわあなたは ？	y
person 1	a bit tired from my training at the track	私のトレーニングの途中から少し疲れた	n
person 2	o dang what type of track do you do ?	何を追っている ？	n
person 1	i am a runner , i still have to take meds but they are not prohibited	麻薬を飲んでいるが禁止されていない	n
person 2	nice that is good , i messed up my neck awhile back too .	よかった首も折れてた	n
person 1	playing sports or accident of some kind ?	スポーツとか事故とか事故とか ？	n
person 2	i work as a bouncer at night and got into a fight .	徹夜で仕事してケンカになったんだ	n
person 1	do you have a day job as well as being a bouncer at night ?	徹夜で仕事があるのか ？	n
person 2	during the day i work at a corner store .	私が店で働いている日に	n
person 1	video games keep my busy at night , not too good for my eye sight	ビデオゲームは夜忙しい夜に集中していて目の前ではあまり良くない	n
person 2	yeah they can definitely be strenuous .	彼らは確実に力強い	n
person 1	guess that is one of the reasons i wear eye glasses	眼鏡を着ている理由が １つある	n
person 2	yeah you should be careful with that .	気をつけた方がいい	y
