# Supplementary material
Source: ML conference proceedings conference paper supplement (https://aclanthology.org/2022.eval4nlp-1.9)
Supplement: SupplementaryMaterial [file 0592.xlsx]

## Sheet: Sheet1
person	source	translation	evaluation: is this a good translation?
person 1	hi how is your day ?	こんにちは、お元気ですか？	y
person 2	it has been great , how about you	元気にしてるよ、君はどう？	y
person 1	a bit tired from my training at the track	陸上のトレーニングでちょっと疲れてます。	y
person 2	o dang what type of track do you do ?	あらら。どんな陸上競技をやってるの？	y
person 1	i am a runner , i still have to take meds but they are not prohibited	僕はランナーなんで、禁止されていない薬を摂らないといけないんですよ。	n
person 2	nice that is good , i messed up my neck awhile back too .	それは良いね、俺もしばらく前に首を痛めたよ。	y
person 1	playing sports or accident of some kind ?	スポーツをしていて？それとも事故かなにかで？	y
person 2	i work as a bouncer at night and got into a fight .	俺は夜警備員として働いているんだけど、喧嘩になってしまったんだ。	n
person 1	do you have a day job as well as being a bouncer at night ?	昼間の仕事をしながら、夜も警備員をやってるんですか？	n
person 2	during the day i work at a corner store .	昼間はコンビニで働いてるよ。	y
person 1	video games keep my busy at night , not too good for my eye sight	僕は夜ビデオゲームで忙しいです、目にはあんまり良くないんだけど。	y
person 2	yeah they can definitely be strenuous .	だな！絶対に負担になってそうだ。	y
person 1	guess that is one of the reasons i wear eye glasses	それが僕が眼鏡をかけることになった理由のひとつなんでしょうね。	y
person 2	yeah you should be careful with that .	そうだな、気をつけた方が良いよ。	y
