# Supplementary material
Source: ML conference proceedings conference paper supplement (https://aclanthology.org/2022.eval4nlp-1.9)
Supplement: SupplementaryMaterial [file 0594.xlsx]

## Sheet: Sheet1
person	source	translation	evaluation: is this a good translation?
person 1	sitting here eating pistachio ice cream while watching videos .	ビデオを見ながらここに座ってアイスを食べてた	n
person 2	sounds fun and filling ! what kind of videos ?	楽しそうな音がするビデオってどんなの ？	n
person 1	medical videos mostly about surgeries and britney spears . love her .	薬とブリトニーのことが好きなんだ	n
person 2	lol i like music , but my favorite is classical .	音楽は好きだが好きなのはクラシックだ	y
person 1	her music inspires me . i am very social , are you ?	彼女の音楽は私を刺激してくれてる私は社会的な人なの ？	n
person 2	yes , for the most part . i travel a lot with my friends .	ええ一番の部分よ私は友達とたくさん旅をしてるの	n
person 1	i travel too ! meeting people from around the world is awesome .	私も旅行してるんだ世界中の人と会うのは最高だ	y
person 2	it is one of my favorite things to do . that and anything with music .	好きなのは音楽と音楽だけだ	n
person 1	do you go out to concerts or clubs ?	ダンスクラブに行くのかクラブに行くのか ？	n
person 2	i go to concerts a lot . especially orchestras .	とても楽しみにしていた特にオーディションはね	n
person 1	nice . i used to play violin when i was a child . but i quit .	子供の頃バイオリン演奏をしてたけど辞めたの	n
person 2	i teach people how to play the violin and viola ! how cool !	バイオリンを弾く方法を教えてるのよ ！	n
person 1	do you play in an orchestra or just teach the instruments ?	エキストラや楽器を教えてるのか ？	n
person 2	i play and teach as well . it is my passion .	私も教えてあげる私の情熱なの	n
person 1	beautiful . maybe , one day i will play again .	美しい日にまた遊びましょう	n
person 2	you should . my dream is to travel and play world wide .	私の夢は旅と世界を旅するのよ	n
