# Supplementary material
Source: ML conference proceedings conference paper supplement (https://aclanthology.org/2022.eval4nlp-1.9)
Supplement: SupplementaryMaterial [file 0594.xlsx]

## Sheet: Sheet1
person	source	translation	evaluation: is this a good translation?
person 1	sitting here eating pistachio ice cream while watching videos .	ビデオを観ながら、ここに座ってピスタチオアイスクリームを食べています。	y
person 2	sounds fun and filling ! what kind of videos ?	楽しそうだし、お腹も満たされそうですね！どんなビデオを？	y
person 1	medical videos mostly about surgeries and britney spears . love her .	主に医療系ビデオです、手術についての。それからブリトニー・スピアーズ。彼女が大好き。	y
person 2	lol i like music , but my favorite is classical .	（笑）私も音楽は好きだけど、私のお気に入りはクラシックです。	y
person 1	her music inspires me . i am very social , are you ?	彼女の音楽は私に刺激をくれるんです。私はとても社交的です、あなたは？	y
person 2	yes , for the most part . i travel a lot with my friends .	はい、ほとんどの場合は。私は友達とよく旅行に行きます。	y
person 1	i travel too ! meeting people from around the world is awesome .	私も旅行しますよ！世界中の人たちに出会うことは素晴らしいですよね。	y
person 2	it is one of my favorite things to do . that and anything with music .	私が大好きなことのひとつです。それと音楽に関することならなんでも。	y
person 1	do you go out to concerts or clubs ?	コンサートやクラブにでかけますか？	y
person 2	i go to concerts a lot . especially orchestras .	コンサートにはよく行きます、とくにオーケストラの。	y
person 1	nice . i used to play violin when i was a child . but i quit .	良いですね。私は子供の頃バイオリンを弾いてました。辞めちゃいましたけど。	y
person 2	i teach people how to play the violin and viola ! how cool !	私は皆さんにバイオリンとビオラの弾き方を教えているんです！奇遇ですね！	n
person 1	do you play in an orchestra or just teach the instruments ?	オーケストラで演奏しているんですか、それとも楽器を教えるだけですか？	y
person 2	i play and teach as well . it is my passion .	教える傍ら演奏もしています。それが私の生きがいなんです。	y
person 1	beautiful . maybe , one day i will play again .	素敵です。もしかしたら、私もまたいつか演奏するかも。	y
person 2	you should . my dream is to travel and play world wide .	するべきですよ。私の夢は演奏しながら世界中を旅することなんです。	y
