# Supplementary material
Source: ML conference proceedings conference paper supplement (https://aclanthology.org/2022.eval4nlp-1.9)
Supplement: SupplementaryMaterial [file 0647.xlsx]

## Sheet: Sheet1
person	source	translation	evaluation: is this a good translation?
person 1	are you looking for any kind of design advice by any chance ?	可能な限りのアドバイスを探しているのか ？	n
person 2	i am not currently , do you work in design ?	私は今は設計されていません	n
person 1	i love traditional style and i am working as a freelance designer . what do you do ?	伝統的なスタイルと私はプロとして仕事をしています何をしています ？	n
person 2	i work in a firm as a lawyer .	弁護士として働いてるんだ	y
person 1	do you work for dreamworks ? i really want to work for them	夢の仕事をしたいのか ？	n
person 2	i do not actually . do you have any hobbies ? mine is photography .	私は知らないわ私の写真は写真よ	n
person 1	well you know i love design , but i also love animation and classical music	私も良いデザインが好きなのは分かるでしょうが私も大好きな音楽とクラシック音楽も大好きです	n
person 2	very cool . i have also learned how to fly a plane . it is very freeing .	すごくクールで飛行機を操縦する方法も知っていますとても冷凍庫です	n
person 1	noah , that is so awesome . take any cool trips ?	それは素晴らしい旅だったわ楽しんでる ？	n
person 2	yes i visit the keys quite often . its a change of pace from my moutain living .	はい多くの鍵を訪ねてきました私の口髭から人生を変えています	n
person 1	and you get to fly in there ? that is insane	飛行機に乗るのは馬鹿げてる	n
person 2	yes , i own my own plane . its nothing fancy , but its nice to own my own .	自分の飛行機は好きだが自分の物にしてくれて嬉しい	n
person 1	well if you ever need any kind of design advice for that , let me know	そのためのアドバイスが必要だったら教えてくれ	n
person 2	thank you ! i sure will .	ありがとう絶対に	y
