# Supplementary material
Source: ML conference proceedings conference paper supplement (https://aclanthology.org/2022.eval4nlp-1.9)
Supplement: SupplementaryMaterial [file 0647.xlsx]

## Sheet: Sheet1
person	source	translation	evaluation: is this a good translation?
person 1	are you looking for any kind of design advice by any chance ?	もしかして、なにかデザインに関するアドバイスを求めてない？	y
person 2	i am not currently , do you work in design ?	今のところないですね、デザインの仕事をしてるんですか？	y
person 1	i love traditional style and i am working as a freelance designer . what do you do ?	僕は伝統的スタイルが大好きで、フリーランスのデザイナーとして働いているんだ。君の仕事は？	y
person 2	i work in a firm as a lawyer .	私は弁護士として事務所で働いています。	y
person 1	do you work for dreamworks ? i really want to work for them	ドリームワークス社を担当してる？僕はほんとにあそこで働きたいんだけど。	n
person 2	i do not actually . do you have any hobbies ? mine is photography .	いいえ、全然。なにか趣味はありますか？私の趣味は写真です。	n
person 1	well you know i love design , but i also love animation and classical music	えーと、僕がデザイン好きなことはもう知ってるだろうけど、アニメやクラシック音楽も大好きなんだ。	y
person 2	very cool . i have also learned how to fly a plane . it is very freeing .	良いですね。私は飛行機の操縦の仕方も学んだんですよ。とても開放的な気分になるんです。	y
person 1	noah , that is so awesome . take any cool trips ?	うわぁ、凄いね。素敵な旅行に行くことはある？	y
person 2	yes i visit the keys quite often . its a change of pace from my moutain living .	はい、ちょくちょくキーズに行きますよ。山での生活からの気分転換になるんです。	n
person 1	and you get to fly in there ? that is insane	それで、そこまで飛行機で行くの？ヤバいね。	y
person 2	yes , i own my own plane . its nothing fancy , but its nice to own my own .	はい、自分の飛行機をもっているので。高級なものではないですが、自家用を持つのは良いものですよ。	y
person 1	well if you ever need any kind of design advice for that , let me know	ともあれ、なにか飛行機のデザインに関するアドバイスが必要になったら、知らせてくれよ。	y
person 2	thank you ! i sure will .	ありがとう！もちろんそうします。	y
