# Supplementary material
Source: ML conference proceedings conference paper supplement (https://aclanthology.org/2022.eval4nlp-1.9)
Supplement: SupplementaryMaterial [file 0649.xlsx]

## Sheet: Sheet1
person	source	translation	evaluation: is this a good translation?
person 1	what did you do this morning ?	今朝はなにをしたの？	y
person 2	shot a big lion on mount everest , you ?	エベレスト山で大きなライオンを撃ち殺したよ、君は？	n
person 1	oh my gosh ! how horrid ! i believe in treating animals humanely	ええーっ！酷すぎ！僕は人道的に動物を扱うことを信じてるのに。	y
person 2	i am sorry to hear that ! i play with models of animals made of clay haha	それはごめんね！僕は粘土で作った動物の模型で遊ぶんだよ、はは。	y
person 1	that is a lot more humane . i do not eat meat or animal products	それならだいぶ人道的だね。僕は肉や動物性食品を食べないんだ。	y
person 2	just vegetables for you my man ?	野菜だけ食べるのかい、君は？	y
person 1	yes . especially mashed potatoes . those are the best !	うん。特にマッシュポテト。あれは最高だ！	y
person 2	i love them , do you ever do art ?	僕も大好きだよ。美術をやったことは？	y
person 1	i wish i did it more . i sometimes paint . you ?	もっとやれば良かったな。僕は時々絵を描くよ。君は？	y
person 2	what do you paint usually ? i am not great at art .	普段はなにを描くの？僕は美術は得意じゃないよ。	y
person 1	i paint pictures of soccer balls . i know that is strange but i love soccer	僕はサッカーボールの絵を描くんだよ。変なことは自覚してるけど、サッカーが大好きだから。	y
person 2	soccer is fun , i played when i was little .	サッカーは楽しいよね、小さい頃やってたよ。	y
person 1	do you like watching any tv shows ?	なにかテレビ番組を見るのは好き？	y
person 2	i like the show game of throne it is good , but i prefer trying art .	僕はゲーム・オブ・スローンズが好きだな、良い番組だよ、でもアートを極める方が楽しいな。	y
person 1	i love that show ! khal drogo is just too hot	僕もあの番組大好き！カール・ドロゴがカッコよすぎ。	y
person 2	love the man , what are you up to ?	あの人大好き。君は今なにをしてるの？	n
