# Supplementary material
Source: ML conference proceedings conference paper supplement (https://aclanthology.org/2022.eval4nlp-1.9)
Supplement: SupplementaryMaterial [file 0649.xlsx]

## Sheet: Sheet1
person	source	translation	evaluation: is this a good translation?
person 1	what did you do this morning ?	今朝何をしたんだ ？	y
person 2	shot a big lion on mount everest , you ?	もっと大きなライオンを撃ち殺したんだな ？	n
person 1	oh my gosh ! how horrid ! i believe in treating animals humanely	恐ろしい動物の扱いを信じてるんだ	n
person 2	i am sorry to hear that ! i play with models of animals made of clay haha	それは残念だ動物モデルのモデルと遊んでたんだ	n
person 1	that is a lot more humane . i do not eat meat or animal products	人間の肉や肉も食べない	n
person 2	just vegetables for you my man ?	私の男のために野菜を ？	n
person 1	yes . especially mashed potatoes . those are the best !	そう特にジャガイモは最高だ ！	n
person 2	i love them , do you ever do art ?	大好きなんだ芸術家になるのか ？	n
person 1	i wish i did it more . i sometimes paint . you ?	もう一度描いてみたいんだが君は ？	n
person 2	what do you paint usually ? i am not great at art .	いつも芸術は得意じゃない	n
person 1	i paint pictures of soccer balls . i know that is strange but i love soccer	サッカーボールの絵を描いたけど変なサッカー大好きなの	n
person 2	soccer is fun , i played when i was little .	サッカーは楽しいわ子供の頃遊んだの	n
person 1	do you like watching any tv shows ?	テレビ番組は好き ？	y
person 2	i like the show game of throne it is good , but i prefer trying art .	私は王座の試合が好きだけど芸術家になりたい	n
person 1	i love that show ! khal drogo is just too hot	I love that show that show i t, I 's too hot i t' s too hot!	n
person 2	love the man , what are you up to ?	Love, man, what are you doing t o d o?	n
