# Supplementary material
Source: ML conference proceedings conference paper supplement (https://aclanthology.org/2022.eval4nlp-1.9)
Supplement: SupplementaryMaterial [file 0655.xlsx]

## Sheet: Sheet1
person	source	translation	evaluation: is this a good translation?
person 1	hello , would you forgive your friends if they destroyed your new car ?	こんにちは、もし君の友達が君の新車を壊したら、その友達を許せる？	n
person 2	probably , but it would take some time for sure . do you like harry potter ?	多分ね、きっとそれには時間がかかるだろうけど。君はハリーポッター好き？	y
person 1	to a certain extent i do like him but not very much	ある程度は好きだけど、それほどでもないよ。	y
person 2	the movies are okay , but the books are so much better .	映画もまああまあだけど、本の方がずっと良いんだ。	y
person 1	my dad is a die hard for him too	僕のお父さんも根っからのファンだよ。	y
person 2	that is awesome ! it is hit or miss i suppose .	それは凄いね！当たり外れがあるんだよね、僕が思うに。	y
person 1	every weekend he has to watch a movie for harry potter	毎週末、彼はハリーポッターの映画を観ずにいられないんだよ。	y
person 2	that is funny . my dad and i usually go out to eat out every weekend .	それは面白いね。 毎週末、僕とお父さんはいつも外食するんだ。	n
person 1	for us we dine out on birthdays or when mum and dad are happy	僕達の場合は、誕生日とか、お母さんとお父さんが円満なときに外食するよ。	n
person 2	dining out is where my family and i usually bond with one another .	外食は家族と僕がお互いに絆を深める機会になってる。	y
person 1	it is a sign that shows that our parents are happy	僕らの両親はハッピーだという証だよ。	y
person 2	they typically are . eating and driving in the country makes my parents happy on weekends .	たいていはそうなんだ。週末に食事したり、田舎をドライブしたりすると両親はハッピーになるんだ。	y
person 1	i will also do it when i grow up	大人になったら、自分もそうしたいな。	y
person 2	i would highly recommend it !	僕もそれを強くおすすめするよ！	y
person 1	will you also do it when you grow up ?	君も大人になったらそうしたい？	y
person 2	i already do ! i love driving in the country with them .	僕はもうそうしてるよ！両親と田舎をドライブするのが大好きだよ。	y
