# Supplementary material
Source: ML conference proceedings conference paper supplement (https://aclanthology.org/2022.eval4nlp-1.9)
Supplement: SupplementaryMaterial [file 0655.xlsx]

## Sheet: Sheet1
person	source	translation	evaluation: is this a good translation?
person 1	hello , would you forgive your friends if they destroyed your new car ?	新しい車が破壊されたらお友達を許してくれる ？	n
person 2	probably , but it would take some time for sure . do you like harry potter ?	時間はかかるかもしれないがハーリングは好きかな ？	n
person 1	to a certain extent i do like him but not very much	彼が好きなのは確かだがあまり好きじゃない	y
person 2	the movies are okay , but the books are so much better .	映画は大丈夫だが本はもっといい	y
person 1	my dad is a die hard for him too	パパも死ぬのもつらい	n
person 2	that is awesome ! it is hit or miss i suppose .	それは素晴らしい、それは当たっているか、またはそれが失われているかを見なければなりません。	y
person 1	every weekend he has to watch a movie for harry potter	毎週彼は映画を見る必要があります...... 彼はハヌードを見る必要があります。	n
person 2	that is funny . my dad and i usually go out to eat out every weekend .	パパとパパは毎週食事に出かけるの	n
person 1	for us we dine out on birthdays or when mum and dad are happy	誕生日とかママが幸せな時に食事をするの	n
person 2	dining out is where my family and i usually bond with one another .	夕食は家族と私はいつも別の約束をしている	n
person 1	it is a sign that shows that our parents are happy	両親が幸せな姿を見せてくれるサインだ	y
person 2	they typically are . eating and driving in the country makes my parents happy on weekends .	普通は食べるし週末は両親が幸せになる	n
person 1	i will also do it when i grow up	成長したら私もやるわ	y
person 2	i would highly recommend it !	私はそれを提案することができます ！	n
person 1	will you also do it when you grow up ?	大人になってもいいのか ？	n
person 2	i already do ! i love driving in the country with them .	もう決めたわ彼らと一緒にドライブしたいの	n
