# Supplementary material
Source: ML conference proceedings conference paper supplement (https://aclanthology.org/2022.eval4nlp-1.9)
Supplement: SupplementaryMaterial [file 0692.xlsx]

## Sheet: Sheet1
person	source	translation	evaluation: is this a good translation?
person 1	hi ! how are you today ?	今日はどうだった ？	y
person 2	i am doing great ! i just wrote a new poem .	元気よ新しい詩を書いたの	y
person 1	awesome ! what was the poem about ?	素晴らしい詩は何だった ？	y
person 2	how much i love my pet beta fish .	ペットのコスタが大好きなの	n
person 1	those are so cool , i love fish . i love all animals , actually .	いい魚だみんな大好きだ	n
person 2	what is your favorite animal ? i have always wanted a pet alligator .	動物好きなのはペット飼いが欲しかったんだ	n
person 1	awesome ! i love dogs but i have always wanted a pet pig .	犬が好きだけどペットが欲しかったんだ	n
person 2	pigs are really cool . i would love to take it golfing with my friends	豚はカッコいいし友達と踊ってみたいわ	n
person 1	too funny ! i would teach it to dance to country music , my favorite .	面白いわね私は大好きな音楽を教えてあげるわ	n
person 2	oh all the members of the gun club i head would love that !	おお、私が大好きなクラブのメンバー全員が銃を持ってるわ ！	n
person 1	i bet they would , it would be quite a sight !	それは確かに、それは非常によく見えるだろうと思います ！	n
person 2	we could dress it up in the old clothes that we collected for the homeless .	その古い服を着てホームレスのために買った服に着替えてもいいかな ？	n
person 1	yes ! we could make him the cover model for my vegan newsletter .	そうだよ新しいドレスのモデルを隠しておくことができる	n
person 2	that would be totally awesome !	それは素晴らしいわね ！	y
person 1	yes it would be great .	ええ素晴らしいわ	n
person 2	maybe i will go to the zoo tomorrow to pick one up .	明日動物園に行くわ	n
