# Supplementary material
Source: ML conference proceedings conference paper supplement (https://aclanthology.org/2022.eval4nlp-1.9)
Supplement: SupplementaryMaterial [file 0692.xlsx]

## Sheet: Sheet1
person	source	translation	evaluation: is this a good translation?
person 1	hi ! how are you today ?	こんにちは！元気？	y
person 2	i am doing great ! i just wrote a new poem .	とても元気だよ！ 新しい詩を書いたんだ。	y
person 1	awesome ! what was the poem about ?	凄いね！何についての詩なの？	y
person 2	how much i love my pet beta fish .	僕がいかにペットの魚が大好きかについて。	y
person 1	those are so cool , i love fish . i love all animals , actually .	あれはすごくかっこいいよね、私も魚が大好き。ていうか動物全部大好きなんだけどね。	y
person 2	what is your favorite animal ? i have always wanted a pet alligator .	一番好きな動物は何？僕はアリゲーターをペットにしたいといつも思ってるんだけど。	y
person 1	awesome ! i love dogs but i have always wanted a pet pig .	凄いね！私は犬が大好きだけど、豚をペットにしたいとずっと思ってるの。	y
person 2	pigs are really cool . i would love to take it golfing with my friends	豚はほんとにかっこいいいよ。友達とゴルフに行くときに連れて行きたいくらいだよ。	n
person 1	too funny ! i would teach it to dance to country music , my favorite .	面白すぎ！私なら好きなカントリーミュージックに合わせてダンスを教えたいな。	y
person 2	oh all the members of the gun club i head would love that !	あー、それ、僕がリーダーやっている射撃クラブのやつら全員、のってくるだろうな！	y
person 1	i bet they would , it would be quite a sight !	絶対ね、凄い光景になりそう！	y
person 2	we could dress it up in the old clothes that we collected for the homeless .	ホームレス用に僕たちが集めた中古の洋服を着せても良いね。	y
person 1	yes ! we could make him the cover model for my vegan newsletter .	うん！私のヴィーガン・ニュースレターの表紙のモデルにしてあげられるわ。	y
person 2	that would be totally awesome !	まじで凄いことになりそうだ！	y
person 1	yes it would be great .	うん、最高だよね。	y
person 2	maybe i will go to the zoo tomorrow to pick one up .	明日動物園に行って、一匹連れて来ようかな。	y
