# Supplementary material
Source: ML conference proceedings conference paper supplement (https://aclanthology.org/2022.eval4nlp-1.9)
Supplement: SupplementaryMaterial [file 0801.xlsx]

## Sheet: Sheet1
person	source	translation	evaluation: is this a good translation?
person 1	hello . how are you today ?	こんにちは今日はどうですか ？	y
person 2	i am well ! how about yourself ?	元気よあなたは ？	y
person 1	doing fine . tired from working 60 hours a week .	よくやった週 6 0 時間から疲れてた	n
person 2	that is a long week ! you need to go fishing and relax !	それは長い一週間だ釣りに行ってリラックスしろ ！	n
person 1	i fish sometimes . i like to watch the sun rise and set .	魚は時々太陽が昇るのを見たいんだ	n
person 2	i love fishing with my dog bob . i love on an island	犬と釣りが好きなんだ島で愛してる	n
person 1	i need to exercise more . maybe with my dog .	もっと練習しないと犬と一緒に	y
person 2	what is your dogs name ?	犬の名前は ？	y
person 1	his name is buffalo . we both eat breakfast then go back to bed .	彼の名前はバッファロー朝食は ２ 人ともベッドに戻る	n
person 2	how do you find the time to do that when you work so many hours ?	仕事の時間はどのくらいかかるの ？	n
person 1	we eat breakfast at odd hours sometimes .	変な時に朝食を食べましょう	n
person 2	oh i see ! i am a cannibal . but no one really knows that	そうか俺は料理家だが誰も知らない	n
person 1	i have always wondered what people taste like .	人の趣味はいつも不思議だった	n
person 2	pretty great actually . you should try it	本当に素晴らしいわ試してみて	y
person 1	i just might . you think it is healthy ?	健康だと思いますか ？	n
person 2	i think so . i am in great shape	そう思うわ私は元気そうだけど	n
