# Supplementary material
Source: ML conference proceedings conference paper supplement (https://aclanthology.org/2022.eval4nlp-1.9)
Supplement: SupplementaryMaterial [file 0801.xlsx]

## Sheet: Sheet1
person	source	translation	evaluation: is this a good translation?
person 1	hello . how are you today ?	こんにちは。お元気ですか？	y
person 2	i am well ! how about yourself ?	元気です！あなたは？	y
person 1	doing fine . tired from working 60 hours a week .	元気にしてます。週60時間働いて疲れてますけど。	y
person 2	that is a long week ! you need to go fishing and relax !	それは長い一週間だね！釣りに行ってリラックスした方が良いよ！	y
person 1	i fish sometimes . i like to watch the sun rise and set .	たまに釣りをします。日が昇り、そして沈むのを眺めるのが好きなんです。	y
person 2	i love fishing with my dog bob . i love on an island	僕は飼い犬のボブと一緒に釣りをするのが大好きなんです。島に住んでいるんですよ。	n
person 1	i need to exercise more . maybe with my dog .	私はもっと運動しなくっちゃ。多分うちの犬と一緒にね。	y
person 2	what is your dogs name ?	あなたの犬の名前はなんというの？	y
person 1	his name is buffalo . we both eat breakfast then go back to bed .	バッファローっていうんです。私たちは朝食を食べたらベッドに戻るんですよ。	n
person 2	how do you find the time to do that when you work so many hours ?	そんなに長時間働いているのに、どうしたらそんなことをする時間があるの？	y
person 1	we eat breakfast at odd hours sometimes .	私たちは時々変な時間に朝食を摂るんですよ。	y
person 2	oh i see ! i am a cannibal . but no one really knows that	ああ、なるほどね！僕は人間を食べるんだ。誰もそのことを知らないんだけど。	y
person 1	i have always wondered what people taste like .	人間はどんな味がするのかなーといつも思ってました。	y
person 2	pretty great actually . you should try it	実は結構美味しいんだよ。あなたも試してみたほうが良いよ。	y
person 1	i just might . you think it is healthy ?	そうしようかな。健康的だと思います？	y
person 2	i think so . i am in great shape	そうだと思うよ。僕は体調がすごく良いから。	y
