# Supplementary material
Source: ML conference proceedings conference paper supplement (https://aclanthology.org/2022.eval4nlp-1.9)
Supplement: SupplementaryMaterial [file 0805.xlsx]

## Sheet: Sheet1
person	source	translation	evaluation: is this a good translation?
person 1	hi . i just got back from work . it was so busy .	こんにちは。私は仕事から戻ったところです。とっても忙しかったです。	y
person 2	hi . i am lucky . i was just swimming . love it . how about you ?	こんにちは。私はついてるのね。水泳してました。水泳が大好きなんです。あなたは？	y
person 1	i enjoy swimming . i am more excited about halloween coming up . its my favorite holiday .	私も水泳は好きですよ。もうすぐ来るハロウィーンの方が楽しみなんですけどね。私の一番好きな祭日です。	y
person 2	me too ! but i wish there were more traditional spicy foods .	私も！でも、伝統的な辛い食べ物がもっとあればいいのに。	y
person 1	many hispanic foods for day of the dead are spicy .	死者の日用のラテンアメリカ系の食べ物は辛いものが多いですよ。	y
person 2	i love mexican food . i have gone there many times . i love going to europe too .	私はメキシコ料理が大好きです。メキシコには何度も行ったことがあります。ヨーロッパに行くのも大好きです。	y
person 1	nice . i like to stay close to home and scare kids with me hearse . ll .	良いですね。私は家の近くで子どもたちを霊柩車で怖がらせたいです。（笑）	y
person 2	ha ! ! ! as an only kind of a housemaid , i missed out on a lot of that .	え！！！私はお手伝いさんの一人娘なので、いろいろ経験しそびれましたね。	y
person 1	aw , i am sorry . do you have any hobbies ? i enjoy crocheting .	あー、ごめんなさい。なにか趣味はありますか？私はかぎ針編みが好きなんです。	y
person 2	mostly traveling , swimming and eating spicy food . what else do you like ?	主に旅行、水泳、それに辛い食べ物。あなたはその他に何が好きですか？	y
person 1	dressing up in costumes , and crafty things . it helps that i work at a craft store .	コスプレしたり、手芸っぽいこと。 手芸店で働いてることが役立っています。	y
person 2	cool . beats being a housemaid like my mom . i want your job !	素敵ですね。私のお母さんのようにお手伝いさんになるより良いですね。あなたのお仕事がしたいです！	y
