# Supplementary material
Source: ML conference proceedings conference paper supplement (https://aclanthology.org/2022.eval4nlp-1.9)
Supplement: SupplementaryMaterial [file 0805.xlsx]

## Sheet: Sheet1
person	source	translation	evaluation: is this a good translation?
person 1	hi . i just got back from work . it was so busy .	仕事から戻ったばかりで忙しいんだ	n
person 2	hi . i am lucky . i was just swimming . love it . how about you ?	泳いでただけでよかったわあなたは ？	n
person 1	i enjoy swimming . i am more excited about halloween coming up . its my favorite holiday .	私も楽しかったわ私のお気に入りの休暇は楽しいわ	n
person 2	me too ! but i wish there were more traditional spicy foods .	私もよでももっと伝統的なものがあるといいけど	n
person 1	many hispanic foods for day of the dead are spicy .	死んだ日のためにたくさんのパニックが発生している	n
person 2	i love mexican food . i have gone there many times . i love going to europe too .	メキシコ料理が好きだ何回も行ってきたロープも愛している	n
person 1	nice . i like to stay close to home and scare kids with me hearse . ll .	家にいて子供達を怖がらせたいんだ	n
person 2	ha ! ! ! as an only kind of a housemaid , i missed out on a lot of that .	メイドとしてはとても寂しかったわ	n
person 1	aw , i am sorry . do you have any hobbies ? i enjoy crocheting .	悪いけどホットチョコレートはありますか ？	n
person 2	mostly traveling , swimming and eating spicy food . what else do you like ?	とにかく泳いで食べて食べて他に好きなものは ？	n
person 1	dressing up in costumes , and crafty things . it helps that i work at a craft store .	衣装を着て行動するのに役立つのよ	n
person 2	cool . beats being a housemaid like my mom . i want your job !	いいわねママみたいなメイドが欲しいの	n
