# Supplementary material
Source: ML conference proceedings conference paper supplement (https://aclanthology.org/2022.eval4nlp-1.9)
Supplement: SupplementaryMaterial [file 0845.xlsx]

## Sheet: Sheet1
person	source	translation	evaluation: is this a good translation?
person 1	will you buy me some cats ?	猫を買ってくれないか ？	y
person 2	no haha do you want one	ハッピーエンドはいらない	n
person 1	yeah i like them . i just got a new employment opportunity	気に入ったよ新しい仕事があるんだ	n
person 2	that is cool what is your new job	いい仕事だな	n
person 1	it is private . what is your favorite color ?	個人的な色で好きな色は何色 ？	n
person 2	i like a lot of colors cause i paint in my free time	自由の時に描いた色が好きなの	n
person 1	i wanted you to say green .	私は緑色と言いたい	n
person 2	is that your favorite color	♪ That i s your favorite color ♪ ♪	n
person 1	yes , it is i love it	♪ Yeah, it 's love i t ♪	n
person 2	what do you do for fun	楽しいことをするのか ？	n
person 1	travel , look at cars , and green things .	旅行、車、緑のものを見て	n
person 2	that is nice i like to go to museums	それはよかった	n
person 1	you could take me sometime .	いつか私を連れて行ってくれない ？	y
person 2	yeah i would love to	ええぜひ行きたいわ	n
