# Supplementary material
Source: ML conference proceedings conference paper supplement (https://aclanthology.org/2022.eval4nlp-1.9)
Supplement: SupplementaryMaterial [file 0845.xlsx]

## Sheet: Sheet1
person	source	translation	evaluation: is this a good translation?
person 1	will you buy me some cats ?	私に猫を買ってくれますか？	y
person 2	no haha do you want one	いや、はは、飼いたいんですか？	y
person 1	yeah i like them . i just got a new employment opportunity	はい、好きなんです。私は新しい就職先が決まったばかりです。	y
person 2	that is cool what is your new job	それは良かったね。新しい仕事はなんですか？	y
person 1	it is private . what is your favorite color ?	それは秘密です。あなたのお気に入りの色はなんですか？	y
person 2	i like a lot of colors cause i paint in my free time	私はいろんな色が好きなんです、時間があるときに絵を描くので。	y
person 1	i wanted you to say green .	緑って言って欲しかったなあ。	y
person 2	is that your favorite color	それがあなたの好きな色なんですか？	y
person 1	yes , it is i love it	はい、そうです。大好きなんです。	y
person 2	what do you do for fun	あなたの趣味はなんですか？	y
person 1	travel , look at cars , and green things .	旅行、車を見ること、そして緑色の物。	y
person 2	that is nice i like to go to museums	それは素敵ですね。私は博物館に行くのが好きです。	y
person 1	you could take me sometime .	いつか私も連れて行ってくださいよ。	y
person 2	yeah i would love to	はい、喜んで。	y
