# Supplementary material
Source: ML conference proceedings conference paper supplement (https://aclanthology.org/2022.eval4nlp-1.9)
Supplement: SupplementaryMaterial [file 0867.xlsx]

## Sheet: Sheet1
person	source	translation	evaluation: is this a good translation?
person 1	the new all american rejects track is about to drop , gotta have it .	アメリカの新しい計画が中止になったんだ	n
person 2	share it with me ! i am kind of down . feel like giving up . maybe it will help	私と共有してくれないとダメな感じがするの助けになるかもしれないのかもしれないわ	n
person 1	you should run a marathon , it gives you natural highs .	あなたはマストで走れば自然になれるわよ	n
person 2	sometimes drawing gives me some natural highs .	時々自然界を描いてくれるんだ	n
person 1	i suck at drawing . weightlifting can make you feel like a conqueror , try that .	絵を描いてるだけだ征服者みたいに感じられるか試してみろ	n
person 2	can i read my comics while i lift weights ?	高い所まで読んでもいいか ？	n
person 1	read comics , listen to all american rejects , it will lift you up . got pets ?	アメリカの計画を読んでペットを飼うのか ？	n
person 2	yes . a couple of dogs . i might public my art work online . will you see it ?	ええ犬が ２ 匹いるわネットで見てもいいかしら ？	n
person 1	sure , i can show my support . ever have a great dane ?	私の支援を見せてくれる ？	n
person 2	no but i would love one . do you have one ?	いいえでも １ 人は好きです	n
person 1	got three of them . they are very glassy girls but a bit spoiled .	３ 人の女の子を捕まえたがとても甘い女の子だ	n
person 2	sounds like a house full !	まるで家中みたいだ ！	n
person 1	princesses i tell you . odd for a weightlifter but i love them .	変な話だけど愛してるわ	n
person 2	no , i think you owning a yorkie would be more weird .	いや君はもっと奇妙なことになると思うよ	n
person 1	hey , i used to have a yorkie !	俺もだ ！	n
person 2	me too ! i like bigger dogs .	もっと大きい犬が好きだ	n
