# Supplementary material
Source: ML conference proceedings conference paper supplement (https://aclanthology.org/2022.eval4nlp-1.9)
Supplement: SupplementaryMaterial [file 0867.xlsx]

## Sheet: Sheet1
person	source	translation	evaluation: is this a good translation?
person 1	the new all american rejects track is about to drop , gotta have it .	オール・アメリカン・リジェクツの新曲がもうすぐ発売になるから、ゲットしなくちゃ。	y
person 2	share it with me ! i am kind of down . feel like giving up . maybe it will help	僕にもシェアしてよ！ちょっと落ち込んでいるんだ。諦めたいような気分。それで気分がましになるかも。	y
person 1	you should run a marathon , it gives you natural highs .	マラソンをすると良いよ、自然にハイになれるんだ。	y
person 2	sometimes drawing gives me some natural highs .	ときどき絵を描くことで自然にハイになれるんだけどね。	y
person 1	i suck at drawing . weightlifting can make you feel like a conqueror , try that .	僕は絵は下手だよ。重量挙げをすると征服者みたいな気分になれるよ、試してみて。	y
person 2	can i read my comics while i lift weights ?	重量挙げをしながら漫画を読むことはできるだろうか？	y
person 1	read comics , listen to all american rejects , it will lift you up . got pets ?	漫画を読んで、オール・アメリカン・リジェクツを聴こう、それで気分が上がるよ。ペットは飼ってる？	n
person 2	yes . a couple of dogs . i might public my art work online . will you see it ?	うん、犬を２匹。自分の美術作品をオンラインで発表するかもしれないんだ。君も見てくれる？	y
person 1	sure , i can show my support . ever have a great dane ?	もちろん応援するよ。グレート・デーンは飼ったことある？	y
person 2	no but i would love one . do you have one ?	いや、でもぜひ飼ってみたいな。君は飼っているの？	y
person 1	got three of them . they are very glassy girls but a bit spoiled .	３匹飼ってるよ。とても艶の良い子たちなんだけど、ちょっと甘やかされてる。	y
person 2	sounds like a house full !	家中賑やかだろうね！	y
person 1	princesses i tell you . odd for a weightlifter but i love them .	まさにプリンセスたちだね。重量挙げ選手には似合わないかもしれないけど、愛しているんだ。	y
person 2	no , i think you owning a yorkie would be more weird .	いや、君がヨークシャーテリアを飼ってるっていう方が変だと思うけど。	y
person 1	hey , i used to have a yorkie !	こら、僕は以前ヨークシャーテリアを飼ってたんだぞ！	y
person 2	me too ! i like bigger dogs .	僕もだよ！僕は大きめの犬の方が好きなんだ。	y
