# Supplementary material
Source: ML conference proceedings conference paper supplement (https://aclanthology.org/2022.eval4nlp-1.9)
Supplement: SupplementaryMaterial [file 0868.xlsx]

## Sheet: Sheet1
person	source	translation	evaluation: is this a good translation?
person 1	hey , just got back from a run . how are you ?	走ってきたばかりだ元気か ？	y
person 2	hey i am doing good how are you	調子はどうだ ？	n
person 1	feeling pretty great . what are you up to ?	いい気分だどうした ？	y
person 2	just finished reading a book to my child	子供に本を読んだだけよ	n
person 1	what book did you read ?	本は何を読んだ ？	y
person 2	the cat in the hat	帽子に猫が	n
person 1	that is always a favorite . i will probably read it to my kids one day .	それはいつも好きなんだいつか子供たちに読んでやるよ	y
person 2	yes that book will never get odl	そうだ本は決して使えない	n
person 1	what do you do in your daily life ?	毎日何をしているの ？	y
person 2	i work from home how about you ?	家から帰ってきたのは ？	n
person 1	i own a gym and run a fitness blog .	ジムとブログを勉強してたんだ	n
person 2	cool . glad you said that . i am trying to get my stomach in shape	よかったな腹が減ってきた	n
person 1	yeah , you cannot just selectively tone . its a fully body and mind experience	そうだな体と経験だけは無理だ	n
person 2	yes but my stomach is the only part i want to work on	ええでも私の胃だけが仕事をしたいの	n
person 1	well , burgees can be a good start , just be warmed up	始めてもいい頃にはなるけど暖かいわ	n
person 2	what is burgees ? my stomach is all wrinkly after having baby	お腹が痛いのよ	n
person 1	do a pushup , pull your feet up , jump up , reach up , go back to pushup position	体を丸めて飛び上がってくるんだ	n
person 2	i am wanting my stomach to be back flat	胃が戻ってきたいんだ	n
person 1	time and hard work are the only ways	時間とハードワークだけが唯一の方法です	n
person 2	how long have you been a fitness coach ?	どのくらいガタガタのコーチをしていたの ？	n
person 1	i have been a fitness coach for three years	3 年間コーチをしてきました	n
person 2	do you have a website for your blog ?	ブログにサイトは ？	n
