# Supplementary material
Source: ML conference proceedings conference paper supplement (https://aclanthology.org/2022.eval4nlp-1.9)
Supplement: SupplementaryMaterial [file 0868.xlsx]

## Sheet: Sheet1
person	source	translation	evaluation: is this a good translation?
person 1	hey , just got back from a run . how are you ?	やあ、ランニングから戻ったところです。元気ですか？	y
person 2	hey i am doing good how are you	こんにちは、私は元気です。あなたは？	y
person 1	feeling pretty great . what are you up to ?	とても元気ですよ。今何をしてるんですか？	y
person 2	just finished reading a book to my child	子供に本の読み聞かせをしたところです。	y
person 1	what book did you read ?	何の本を読んだんですか？	y
person 2	the cat in the hat	キャットインザハット、ぼうしをかぶったへんなねこ	y
person 1	that is always a favorite . i will probably read it to my kids one day .	それは一番好きなやつです。いつか自分の子どもたちにも読んであげるだろうな。	y
person 2	yes that book will never get odl	ええ、この本は不朽ですよね。	y
person 1	what do you do in your daily life ?	毎日どんなことをしてますか？	y
person 2	i work from home how about you ?	私は在宅で仕事をしてるんです。あなたは？	y
person 1	i own a gym and run a fitness blog .	私はジムを持っていて、フィットネスのブログを運営してるんです。	y
person 2	cool . glad you said that . i am trying to get my stomach in shape	良いですね。それを言ってくれて良かったわ。お腹を鍛えようと頑張ってるところなんですよ。	y
person 1	yeah , you cannot just selectively tone . its a fully body and mind experience	ああ、部分的に鍛えることはできないんです。体と心全体の経験なんです。	n
person 2	yes but my stomach is the only part i want to work on	そうでしょうけど、なんとかしたい部分はお腹だけなんですよ。	y
person 1	well , burgees can be a good start , just be warmed up	そうですね、バーピーから始めるのが良いかも、準備運動として。	n
person 2	what is burgees ? my stomach is all wrinkly after having baby	バーピーって何ですか? 出産後私のお腹はシワシワになってしまったんです。	n
person 1	do a pushup , pull your feet up , jump up , reach up , go back to pushup position	腕立て伏せをして、両足を引き寄せ、ジャンプして、手を上に伸ばし、腕立て伏せの姿勢に戻るんです。	y
person 2	i am wanting my stomach to be back flat	私はお腹を平らに戻したいんですよね。	y
person 1	time and hard work are the only ways	時間と努力が唯一の道です。	y
person 2	how long have you been a fitness coach ?	あなたはフィットネスコーチになってどれぐらいになるんですか？	y
person 1	i have been a fitness coach for three years	フィットネスコーチは３年やってます。	y
person 2	do you have a website for your blog ?	ブログのウェブサイトはありますか？	y
