# Supplementary material
Source: ML conference proceedings conference paper supplement (https://aclanthology.org/2022.eval4nlp-1.9)
Supplement: SupplementaryMaterial [file 0869.xlsx]

## Sheet: Sheet1
person	source	translation	evaluation: is this a good translation?
person 1	how are you doing this evening	こんばんは、元気ですか？	y
person 2	i am well , just watching tv with bart . how are you ?	元気です。バートと一緒にテレビを観ていました。あなたは？	y
person 1	who is bart ? is that a pet ? animals are a love of mine	バートって誰？ペットですか？私も大の動物好きですよ。	y
person 2	yes , he is my dog . i could not live without him . do you have pets ?	はい、私の犬なんです。バートがいないと生きていけません。あなたはペットを飼っていますか？	y
person 1	yes i do have pets my farm has pigs , horses and a few hens	はい、私もペットを飼っています。私の農場には豚、馬、それに鶏が何羽かいます。	y
person 2	my father has a farm . my mother used to care for pigs closely . they are divorced now .	うちの父も農場を持っていますよ。母が熱心に豚の世話をしていたものです。ふたりは今は離婚していますが。	y
person 1	i love farming , and country music , guess you can say i am an all american girl	私、農業が大好きなんです、それにカントリーミュージックも。典型的なアメリカンガールだと言えるかもね。	y
person 2	my friends and i listen to country music in the dorms all the time too !	私の友達と私も、寮でいつもカントリーミュージックを聴きますよ。	y
person 1	its a great genre for sure ! its kinda where i got my love for dancing from	ほんとうに素晴らしいジャンルですよね！そこからダンスが好きになったかも。	y
person 2	i wish i had time to dance , i study a lot to be an excellent student	私にもダンスをする時間があればいいんですが。優等生でいたいから猛勉強してるんですよ。	y
person 1	me too ! what are you studying	私もです！何の勉強をしてるんですか？	y
person 2	i am currently studying sociology , it is incredibly fascinating	今は社会学の勉強をしてるんですが、信じられないぐらい面白いですよ。	y
person 1	that is great , a sociology class is actually how i became vegan , learning about gmo products	それはいいことですね、実は私がヴィーガンになったのは社会学の授業のおかげなんです、遺伝子組み換え作物のことを学んで。	y
person 2	i have a lot of vegan friends . how was transitioning into veganism for you ?	私にはヴィーガンの友達がたくさんいますよ。あなたがヴィーガンになる過程はどうでしたか？	n
person 1	its actually been not as bad as i thought , i get many ideas from pinterest	実際には思っていたより酷いものではありませんでした、ピンタレストでたくさんのアイディアをもらったので。	y
person 2	pinterest is a great resource ! i get many decorating ideas for parties there .	ピンタレストは素晴らしい情報源ですよね！私はあそこからパーティの飾り付けアイディアをたくさんもらいましたよ。	y
