# Supplementary material
Source: ML conference proceedings conference paper supplement (https://aclanthology.org/2022.eval4nlp-1.9)
Supplement: SupplementaryMaterial [file 0869.xlsx]

## Sheet: Sheet1
person	source	translation	evaluation: is this a good translation?
person 1	how are you doing this evening	今夜の調子はどう ？	y
person 2	i am well , just watching tv with bart . how are you ?	テレビを見てるだけだ元気か ？	n
person 1	who is bart ? is that a pet ? animals are a love of mine	ペットは好きなのか ？	n
person 2	yes , he is my dog . i could not live without him . do you have pets ?	そう犬なんだペットはいるか ？	n
person 1	yes i do have pets my farm has pigs , horses and a few hens	私の農場にはブタも馬も馬もいます	n
person 2	my father has a farm . my mother used to care for pigs closely . they are divorced now .	父は農場を持っています母は豚の世話をしていました彼らは離婚しています	y
person 1	i love farming , and country music , guess you can say i am an all american girl	私はアメリカの音楽と音楽が大好きです私がアメリカの女の子だと言えるでしょう	n
person 2	my friends and i listen to country music in the dorms all the time too !	友達と私はいつも寮で音楽を聴いているのよ ！	n
person 1	its a great genre for sure ! its kinda where i got my love for dancing from	ダンスのために私の愛を買った素敵な遺伝子だわ	n
person 2	i wish i had time to dance , i study a lot to be an excellent student	ダンスをしたかったわ最高の生徒になりたいわ	n
person 1	me too ! what are you studying	私もです何を勉強していますか ？	y
person 2	i am currently studying sociology , it is incredibly fascinating	私は社会学の勉強をしています、それは非常に興味深いです	y
person 1	that is great , a sociology class is actually how i became vegan , learning about gmo products	それは素晴らしい、社会学です、実際に私がどのようになったかを学ぶ、実際には、実際に私はベネガンについて勉強しました	n
person 2	i have a lot of vegan friends . how was transitioning into veganism for you ?	私には多くの友人がいますあなたのために何をしていたの ？	n
person 1	its actually been not as bad as i thought , i get many ideas from pinterest	実は思ったほど悪くないと思っていたんだが、いろいろ考えがあるんだ。	n
person 2	pinterest is a great resource ! i get many decorating ideas for parties there .	いい情報だ。パーティーのためにたくさんのアイデアを集めている。	n
