# Supplementary material
Source: ML conference proceedings conference paper supplement (https://aclanthology.org/2022.eval4nlp-1.9)
Supplement: SupplementaryMaterial [file 0879.xlsx]

## Sheet: Sheet1
person	source	translation	evaluation: is this a good translation?
person 1	hello how are you today ?	こんにちは、元気ですか？	y
person 2	i am a little under the weather . odd b c i definitely get my apple in a day ! you ?	ちょっと体調が悪いんですよ。毎日必ずりんごをたべているのに変ですね！あなたは？	y
person 1	i am doing pretty good i just git signed as an extra for a major motion picture	私は元気にしています。私は大作映画のエキストラの契約をしたばかりなんです。	y
person 2	congratulations ! where do you live ?	おめでとう！あなたはどこに住んでますか？	y
person 1	i live in the manhattan i love to paint and create art	私はマンハッタンに住んでいて、絵を描いたり美術製作をするのが大好きなんです。	y
person 2	that is awesome . are you a vegan as well ?	それは凄いですね。あなたもヴィーガンですか？	n
person 1	no i am not are you ?	いいえ、違います。あなたは？	y
person 2	yes i am . i have never really liked the taste of meat . i love fruit though !	はい、そうです。私は肉の味がもともと好きではなかったんです。でも果物は大好きです！	y
person 1	i love fruit also	私もフルーツが大好きですよ。	y
person 2	whats your favorite ? i love apples , especially the green ones !	一番好きなのはなんですか？私はりんごが大好きです、特に緑色のものが！	y
person 1	i also love the green ones and strawberries	私も緑のが大好きだし、いちごも。	y
person 2	umm ! great for making salads too . what do you have planned today ?	うーん！サラダを作るのにも良いですよね。あなたの今日のご予定は？	y
