# Supplementary material
Source: ML conference proceedings conference paper supplement (https://aclanthology.org/2022.eval4nlp-1.9)
Supplement: SupplementaryMaterial [file 0879.xlsx]

## Sheet: Sheet1
person	source	translation	evaluation: is this a good translation?
person 1	hello how are you today ?	今日はどうしてる ？	n
person 2	i am a little under the weather . odd b c i definitely get my apple in a day ! you ?	私は天気の下で少し変なリンゴを手に入れたのは間違いないわよね ？	n
person 1	i am doing pretty good i just git signed as an extra for a major motion picture	私はちょうどいい写真に署名しているだけだから	n
person 2	congratulations ! where do you live ?	おめでとうどこに住んでるの ？	y
person 1	i live in the manhattan i love to paint and create art	絵を描いて芸術を作りたいんだ	n
person 2	that is awesome . are you a vegan as well ?	それは素晴らしい君はベネガンなのか ？	n
person 1	no i am not are you ?	違うの ？	n
person 2	yes i am . i have never really liked the taste of meat . i love fruit though !	肉の味は好きじゃないけど大好きなの	n
person 1	i love fruit also	私も大好き	n
person 2	whats your favorite ? i love apples , especially the green ones !	大好きなリンゴが大好きなの特に緑のやつ ！	n
person 1	i also love the green ones and strawberries	緑とイチゴも大好きだ	n
person 2	umm ! great for making salads too . what do you have planned today ?	おいしいわ今日は何を計画してたの ？	n
