# Supplementary material
Source: ML conference proceedings conference paper supplement (https://aclanthology.org/2022.eval4nlp-1.9)
Supplement: SupplementaryMaterial [file 0891.xlsx]

## Sheet: Sheet1
person	source	translation	evaluation: is this a good translation?
person 1	good afternoon , how are you today ?	こんにちは今日はどうですか ？	y
person 2	it is a good afternoon . i am fine , how bout yourself ?	今日はいい午後だ自分自身はどうだ ？	n
person 1	ok , just worried about this hurricane .	ハリケーンのことを心配してただけだ	n
person 2	ya it is very scary . but god is in control	怖いけど神は支配されている	n
person 1	true . living in florida so it is difficult not to worry .	フロリダで暮らすのは大変だから心配しないで	n
person 2	oh no ! i am so sorry . are you evacuating ?	大変だわ邪魔してるの ？	n
person 1	no , we are not in an evacuation zone yet so we are ok	いや、まだ避難所にはいないだから、大丈夫だ	n
person 2	that is good . hope you and your family are ok	よかった、君と家族は無事だと願うよ	y
person 1	we should be . just worried about power outages . i love to cook good meals , so . . .	私たちは力を心配しなければならないのよ美味しい食事を作るのが好きなの	n
person 2	what is your favorite homemade meal ?	あなたのお気に入りの家は何を作ったの ？	n
person 1	baked ziti ! its easy and flavorful .	簡単な落書きだ	n
person 2	interesting . well i hope you get to make many more cooked meals	面白いねたくさんの料理を作ってくれないか	n
