# Supplementary material
Source: ML conference proceedings conference paper supplement (https://aclanthology.org/2022.eval4nlp-1.9)
Supplement: SupplementaryMaterial [file 0891.xlsx]

## Sheet: Sheet1
person	source	translation	evaluation: is this a good translation?
person 1	good afternoon , how are you today ?	こんにちは、お元気ですか？	y
person 2	it is a good afternoon . i am fine , how bout yourself ?	こんにちは。私は元気です、あなたは？	y
person 1	ok , just worried about this hurricane .	まあまあだけど、このハリケーンの心配をしてるとこだよ。	y
person 2	ya it is very scary . but god is in control	ああ、とても怖いですね。でも神様の思し召しなので。	y
person 1	true . living in florida so it is difficult not to worry .	だね。フロリダに住んでいるから、心配しないわけにはいかなくてね。	y
person 2	oh no ! i am so sorry . are you evacuating ?	あらやだ！すみませんでした。避難してるんですか？	y
person 1	no , we are not in an evacuation zone yet so we are ok	いや、僕たちはまだ避難区域には入っていないから大丈夫だよ。	y
person 2	that is good . hope you and your family are ok	それは良かったです。あなたとご家族が無事でありますように。	y
person 1	we should be . just worried about power outages . i love to cook good meals , so . . .	多分大丈夫だけど。停電だけが心配なんだよ。美味しいご飯をつくるのが大好きだから・・・。	y
person 2	what is your favorite homemade meal ?	あなたが一番好きな家庭料理はなんですか？	y
person 1	baked ziti ! its easy and flavorful .	ベイクト・ズィーティ！ 簡単で美味しいんだ。	y
person 2	interesting . well i hope you get to make many more cooked meals	おいしそう。では、もっとたくさん料理できるようになると良いですね。	y
