# Supplementary material
Source: ML conference proceedings conference paper supplement (https://aclanthology.org/2022.eval4nlp-1.9)
Supplement: SupplementaryMaterial [file 0906.xlsx]

## Sheet: Sheet1
person	source	translation	evaluation: is this a good translation?
person 1	hello ?	もしもし ？	y
person 2	hello , how are you	こんにちは	n
person 1	i am doing well , how are you ?	調子はどうですか ？	n
person 2	pretty good , sold cars all day , its my new job .	いい車を売ったのは俺の仕事だ	n
person 1	that sounds fun , i just seem to cook all day . i enjoy it though .	一日中料理するのが楽しい	n
person 2	right on ! you can cook me some pizza , its my fav !	俺にピザを作ってくれないか ？	n
person 1	maybe some time ! my family has a killer recipe from italy that my three kids love .	たぶん家族が ３ 人の子供を愛するレシピを持ってるんだ	n
person 2	does it involve meat ? i love it !	肉に関係してる ？	n
person 1	of course . do you have family ?	家族はいる ？	n
person 2	yes i do , my wife taught for some time , and my kids are grown .	ええ妻と子供たちは成長しています	n
person 1	lucky ! i have been married a while , but married young . three kids too .	幸運にも結婚してきましたが子供も 3 人です	n
person 2	that is great , maybe sometime i could paint a pic of your family , something i love .	よかったいつか家族の絵を描いてもいいかな	n
person 1	my family back in italy would like that . my parents do not speak english though .	私の家族は英語は話せないわ	n
person 2	so then you speak italian ?	それで、あなたはアジアンと英語と英語と英語を話すのですか ？	n
person 1	italian and english . i moved to america when i was only 14 .	1 4 歳の時アメリカに引っ越したんです	n
person 2	by yourself ?	一人で ？	y
