# Supplementary material
Source: ML conference proceedings conference paper supplement (https://aclanthology.org/2022.eval4nlp-1.9)
Supplement: SupplementaryMaterial [file 0906.xlsx]

## Sheet: Sheet1
person	source	translation	evaluation: is this a good translation?
person 1	hello ?	こんにちは。	y
person 2	hello , how are you	こんにちは、お元気ですか？	y
person 1	i am doing well , how are you ?	元気です、あなたは？	y
person 2	pretty good , sold cars all day , its my new job .	元気だよ、一日中車を売ったよ、僕の新しい仕事なんだ。	y
person 1	that sounds fun , i just seem to cook all day . i enjoy it though .	楽しそうですね、私は一日中料理をしていた感じですね。楽しいんですけどね。	y
person 2	right on ! you can cook me some pizza , its my fav !	やったー！僕にピザを作ってくれるかな、大好物なんだよ！	y
person 1	maybe some time ! my family has a killer recipe from italy that my three kids love .	いつかね！うちの家庭にはイタリア直伝の絶品レシピがあって、３人の子どもたちも大好き。	y
person 2	does it involve meat ? i love it !	それって肉入り？僕も大好き！	y
person 1	of course . do you have family ?	もちろん。家族はいますか？	y
person 2	yes i do , my wife taught for some time , and my kids are grown .	うん、いるよ、妻はしばらく前から教師をしていて、子どもたちはもう大人だよ。	y
person 1	lucky ! i have been married a while , but married young . three kids too .	ラッキーですね！私は若くして結婚してからしばらく経ちます。子供は３人です。	y
person 2	that is great , maybe sometime i could paint a pic of your family , something i love .	それは素晴らしい。いつか君のご家族の絵を描いてあげられるかもしれないよ、趣味なんだ。	y
person 1	my family back in italy would like that . my parents do not speak english though .	イタリアにいる家族が喜びますよ。両親は英語を話さないんですが。	y
person 2	so then you speak italian ?	じゃあ、君がイタリア語を話すんだね？	y
person 1	italian and english . i moved to america when i was only 14 .	イタリア語と英語を。私はたった１４歳でアメリカに移住してきましたから。	y
person 2	by yourself ?	ひとりで？	y
