# Supplementary material
Source: ML conference proceedings conference paper supplement (https://aclanthology.org/2022.eval4nlp-1.9)
Supplement: SupplementaryMaterial [file 0972.xlsx]

## Sheet: Sheet1
person	source	translation	evaluation: is this a good translation?
person 1	hi how are you doing	こんにちは、お元気ですか？	y
person 2	just teaching my kindergarten class	幼稚園の授業をしてました。	y
person 1	that is so nice do you like music	それは素晴らしいね。音楽は好きですか？	y
person 2	i do like music but i prefer the 1980s type	音楽は好きですが、1980年代風のものが好みなんです。	y
person 1	i play drums on the weekends	僕は週末にはドラムを叩きますよ。	y
person 2	that is so cool , what age did you learn	それはかっこいいですね、何歳で覚えたんですか？	y
person 1	when i was in high school	高校生のときです。	y
person 2	do you like tex mex , i really do	テックス・メックスは好きですか？私は大好きです。	y
person 1	yeah that is always so yummy	うん、いつ食べてもとっても美味しいよね。	y
person 2	i know i love it , though sometimes it hurts my stomach	ですよね、私も大好き。時々お腹が痛くなっちゃうんだけど。	y
person 1	yeah are you married i have a girlfriend	そうだね。君は結婚してる？僕には彼女がいるよ。	y
person 2	i am married to my work as a teacher	私は教師という仕事と結婚してるんですよ。	y
