# Supplementary material
Source: ML conference proceedings conference paper supplement (https://aclanthology.org/2022.eval4nlp-1.9)
Supplement: SupplementaryMaterial [file 0972.xlsx]

## Sheet: Sheet1
person	source	translation	evaluation: is this a good translation?
person 1	hi how are you doing	（ 竹本 ） よろしくお願いします	n
person 2	just teaching my kindergarten class	（ 竹本 ） 俺のクラス １ ０ 年だけ教えてくれたんだけど	n
person 1	that is so nice do you like music	音楽が好きなんだね	n
person 2	i do like music but i prefer the 1980s type	音楽は好きだけど好きなのは 8 0 年代の曲	y
person 1	i play drums on the weekends	♪ 週末はドラムを弾いてやる ♪	n
person 2	that is so cool , what age did you learn	♪ それは素敵 ♪ 昔のことを学んだことは ♪	n
person 1	when i was in high school	高校にいた時	y
person 2	do you like tex mex , i really do	クロメックスが好きなのね	n
person 1	yeah that is always so yummy	ああいつもおいしいよ	y
person 2	i know i love it , though sometimes it hurts my stomach	でも時々胃が痛くなる	n
person 1	yeah are you married i have a girlfriend	ええあなたは結婚してる私には彼女がいる	n
person 2	i am married to my work as a teacher	私は教師として結婚している	n
