# Supplementary material
Source: ML conference proceedings conference paper supplement (https://aclanthology.org/2022.eval4nlp-1.9)
Supplement: SupplementaryMaterial [file 0974.xlsx]

## Sheet: Sheet1
person	source	translation	evaluation: is this a good translation?
person 1	hi how are you doing ?	調子はどうだ ？	y
person 2	great , just chilling with my pets . i have a cat and dog , how about you ?	ペットと犬はどうだ ？	n
person 1	nice . no pets right now . i think life is too fast paced for that currently	ペットじゃなくて今のところ人生はあまりにも速いと思う	n
person 2	i am only ten years old so that is not a problem for me .	私は 1 0 歳だから私にとっては問題ではない	y
person 1	nice ! are the pets your own ?	ペットは自分のペットか ？	y
person 2	yes , mine and my moms and dads . my mom is a school teacher .	そうママとダミーとダディは学校の教師よ	n
person 1	oh that is an important job . does she get much free time ?	それは重要な仕事だ彼女は自由になる時間がかかるのか ？	n
person 2	she has some free time , more than my dad , he works at a mill .	父よりも自由な時間がある	n
person 1	oh yes that makes sense . what do you do for fun ?	そうだ楽しんでるのか ？	n
person 2	i go to the mall with my friends , i have loads , its fun . how about you ?	お友達とショッピングモールに行って楽しんでるわあなたは ？	n
person 1	i like fast paced stuff . driving race cars . . . i want to go sky diving .	急いで車で飛び降りるのが好きなんだ	n
person 2	cool , i have to mow the yard at my house today , no fun !	今日は家の庭で楽しくないんだ ！	n
person 1	aw , chores . i have this problem lying to get out of stuff	何か問題があるんだ	n
person 2	i don lie , its bad when you get caught .	私は嘘をついていない場合は、あなたが捕まったときは悪いことです。	n
person 1	yeah but i tend to do whatever i need to in order to move forward	うん、私は何をしなければならないかをするためにする必要があります...... しかし、私は前へ進むために行くために何でもすることができます。	n
person 2	i guess if it works for you that is ok . do you have many friends ?	それがうまくいっても友達はいる ？	n
