# Supplementary material
Source: ML conference proceedings conference paper supplement (https://aclanthology.org/2022.eval4nlp-1.9)
Supplement: SupplementaryMaterial [file 0974.xlsx]

## Sheet: Sheet1
person	source	translation	evaluation: is this a good translation?
person 1	hi how are you doing ?	こんにちは、元気ですか？	y
person 2	great , just chilling with my pets . i have a cat and dog , how about you ?	とても元気です、ペットと一緒にのんびりしていたところです。僕は猫と犬を飼ってるんです。あなたは？	y
person 1	nice . no pets right now . i think life is too fast paced for that currently	良いね。今はペットは飼ってない。ペットを飼うには今の生活は慌ただしすぎると思う。	y
person 2	i am only ten years old so that is not a problem for me .	僕はまだ10歳だから、そういう問題はないんです。	y
person 1	nice ! are the pets your own ?	良いねぇ！自分のペットなの？	y
person 2	yes , mine and my moms and dads . my mom is a school teacher .	はい、僕とお母さんとお父さんの。お母さんは学校の先生なんです。	y
person 1	oh that is an important job . does she get much free time ?	ああ、それは大事なお仕事だね。お母さんは十分お休みが取れる？	y
person 2	she has some free time , more than my dad , he works at a mill .	少しはお休みが取れますよ、製粉工場で働いているお父さんよりは取れます。	y
person 1	oh yes that makes sense . what do you do for fun ?	ああ、なるほどね。君は何をして遊ぶの？	y
person 2	i go to the mall with my friends , i have loads , its fun . how about you ?	友達とモールに行ったり、いろいろ、楽しいです。あなたは？	y
person 1	i like fast paced stuff . driving race cars . . . i want to go sky diving .	僕はペースの早いものが好きなんだ。レースカーを運転したり・・・スカイダイビングをやってみたいんだ。	y
person 2	cool , i have to mow the yard at my house today , no fun !	かっこいいですね、今日は家の庭の芝刈りをしなくちゃいけなくて、つまんない！	y
person 1	aw , chores . i have this problem lying to get out of stuff	へー、お手伝いか。僕には物事から逃げ出すために嘘をつくっていう問題があるんだ。	y
person 2	i don lie , its bad when you get caught .	僕は嘘はつかない。だってバレたらマズイでしょ。	y
person 1	yeah but i tend to do whatever i need to in order to move forward	だよね、でも僕は前に進むためにはどんなことでもしちゃうんだよね。	y
person 2	i guess if it works for you that is ok . do you have many friends ?	それでうまくいくならそれで良いんでしょうね。お友達はたくさんいますか？	y
