# Supplementary material
Source: ML conference proceedings conference paper supplement (https://aclanthology.org/2022.eval4nlp-1.9)
Supplement: SupplementaryMaterial [file 0975.xlsx]

## Sheet: Sheet1
person	source	translation	evaluation: is this a good translation?
person 1	hello , how are you tonight ?	今晩はどうだった ？	n
person 2	i am good ! jamming to some good ol jimi hendrix ! lol	元気だよ今日は元気になったか ？	n
person 1	love hendrix ! i am playing fallout .	俺はイカれてるんだ	n
person 2	that is cool ! you play music ? i am learning guitar ! its rough dude .	俺はギターを勉強してるんだ	n
person 1	no , i do not . i sing though .	いや歌ってるんだ	n
person 2	awesome ! you in college or anything ?	大学か何かでも ？	n
person 1	i am not . i am a teacher .	私は教師なの	n
person 2	that is pretty interesting . i dropped out of college . not my thing .	面白いわ大学から落ちたの	n
person 1	do you like movies ? i love magic mike .	映画が好きなの ？	n
person 2	i will watch them sometimes . i would rather be outside honestly . fishing or hunting .	時々見ておく釣りや釣りに行きたい	n
person 1	i am a city girl , not really a fisher or hunter .	私は町の女の子でもハンターでもない	n
person 2	the country is awesome ! very peaceful and quiet . not much nightlife though .	国は最高だ静かで静かで静かな夜でもない	n
person 1	i do not like to go to clubs or anything like that .	クラブやクラブに行きたくない	n
person 2	what do you do for fun ?	何を楽しんでるの ？	n
person 1	i go geocaching and hike .	俺は飛び降りるんだ	n
person 2	see , you would fit in in the country too ! lol	お前も国の中に入るんだ ！	n
