# Supplementary material
Source: ML conference proceedings conference paper supplement (https://aclanthology.org/2022.eval4nlp-1.9)
Supplement: SupplementaryMaterial [file 0975.xlsx]

## Sheet: Sheet1
person	source	translation	evaluation: is this a good translation?
person 1	hello , how are you tonight ?	こんばんは、お元気ですか？	y
person 2	i am good ! jamming to some good ol jimi hendrix ! lol	僕は元気です！なつかしのジミ・ヘンドリックスでノリノリになってますよ！(笑)	y
person 1	love hendrix ! i am playing fallout .	ヘンドリックス良いですね！私はフォールアウトで遊んでます。	y
person 2	that is cool ! you play music ? i am learning guitar ! its rough dude .	それは良いね！楽器はやる？僕はギターを習ってるんだ。とっても難しいよ。	y
person 1	no , i do not . i sing though .	いや、私はやりません。歌いますけどね。	y
person 2	awesome ! you in college or anything ?	凄いじゃん！君は学生かなにか？	y
person 1	i am not . i am a teacher .	いいえ。私は教師なんです。	y
person 2	that is pretty interesting . i dropped out of college . not my thing .	それはかなり興味深いね。僕は大学を中退したんだ。合わなかったんだよ。	y
person 1	do you like movies ? i love magic mike .	あなたは映画は好き？私はマジック・マイクが大好きです。	y
person 2	i will watch them sometimes . i would rather be outside honestly . fishing or hunting .	いつか観るね。僕は正直、屋外のほうが好きなんだ。釣りとかハンティングとか。	y
person 1	i am a city girl , not really a fisher or hunter .	私は都会っ子だから、釣りもハンティングもそんなに好きじゃないです。	y
person 2	the country is awesome ! very peaceful and quiet . not much nightlife though .	田舎は素晴らしいよ！とても平和で静かだし。ナイトライフは充実してないけどね。	y
person 1	i do not like to go to clubs or anything like that .	私はクラブに行ったりとかそういうのは好きじゃないから。	y
person 2	what do you do for fun ?	君の趣味は何？	y
person 1	i go geocaching and hike .	ジオキャッシングやハイキングに行くこと。	y
person 2	see , you would fit in in the country too ! lol	ほらね、君だって田舎に馴染めるよ！（笑）	y
