# Supplementary material
Source: ML conference proceedings conference paper supplement (https://aclanthology.org/2022.eval4nlp-1.9)
Supplement: SupplementaryMaterial [file 1001.xlsx]

## Sheet: Sheet1
person	source	translation	evaluation: is this a good translation?
person 1	hello . do you enjoy cooking ?	やあ料理は楽しいか ？	y
person 2	i love cooking but i do not have anyone to cook for but myself	料理は好きだが料理は自分で作らなくてもいい	n
person 1	some day i would like to open a bakery .	ある日パン屋を開くのが好きなんだ	n
person 2	you seem like you will do well with your bakery	パン工房でうまくやれるように見えるように見える	n
person 1	my family had a restaurant when i was a kid so i do know about it .	家族は子供の頃レストランを持っていただから知っている	y
person 2	wow i would have love to start a business but i cant get motivated	ビジネスを始めたいが効果はない	n
person 1	right now i work a 9 to 5 job but would love my own business .	今は仕事には 9 時 5 分だが仕事は自分の仕事が欲しい	n
person 2	i have a a job too but i daydream all day	仕事もあるが毎日は夢を見てる	n
person 1	that is not efficient . i try not to .	それは容易じゃないわ私はやりたくないの	n
person 2	i daydream about love i can find a decent relationship	I dream about love I can find a real relationship about a common relationship about a common relationship with a common relationship.	n
person 1	i do not have that right now either .	I don 't have that right now now now.	n
person 2	i am romantically hopeless but i still dream	私は絶望的だけどまだ夢を見てない	n
person 1	that is unfortunate . i am sorry you feel that way .	残念だわこんな風に感じるなんて	n
person 2	never had good luck with my relationships	私の関係に運が無かったわ	n
person 1	not me either but the guys tend to be selfish .	私でもなく男達は利己的に振る舞っている	n
person 2	yes they do i agree	その通りだ	n
