# Supplementary material
Source: ML conference proceedings conference paper supplement (https://aclanthology.org/2022.eval4nlp-1.9)
Supplement: SupplementaryMaterial [file 1001.xlsx]

## Sheet: Sheet1
person	source	translation	evaluation: is this a good translation?
person 1	hello . do you enjoy cooking ?	こんにちは。料理をするのは好き？	y
person 2	i love cooking but i do not have anyone to cook for but myself	料理をするのは大好きだけど、料理をしてあげられる人が自分以外に誰もいないんだよね。	y
person 1	some day i would like to open a bakery .	私はいつかベーカリーを開きたいんだ。	y
person 2	you seem like you will do well with your bakery	あなたならベーカリーで成功できるような気がするよ。	y
person 1	my family had a restaurant when i was a kid so i do know about it .	私が子供の頃、家族がレストランをやっていたから、その知識はあるんだ。	y
person 2	wow i would have love to start a business but i cant get motivated	凄いね。私もぜひビジネスを始めたいんだけど、やる気が出なくて。	y
person 1	right now i work a 9 to 5 job but would love my own business .	今は9時から5時までの仕事をしてるんだけど、自分のビジネスを持てたら良いな。	y
person 2	i have a a job too but i daydream all day	私も仕事はしているけど、一日中妄想してるよ。	y
person 1	that is not efficient . i try not to .	それは効率的じゃないね。私はしないようにしてる。	y
person 2	i daydream about love i can find a decent relationship	恋愛についての妄想をするんだ、ちゃんとした恋愛相手がみつかる的な。	y
person 1	i do not have that right now either .	私も今そんな相手はいないよ。	y
person 2	i am romantically hopeless but i still dream	私は救いようのないロマンチストだけど、まだ夢はみるのよ。	y
person 1	that is unfortunate . i am sorry you feel that way .	それはお気の毒に。あなたがそんな風に感じてるならかわいそう。	y
person 2	never had good luck with my relationships	恋愛でラッキーだったことなんて一度もないわよ。	y
person 1	not me either but the guys tend to be selfish .	私もないけど、男は自己中な人が多いし。	y
person 2	yes they do i agree	うん、そうだね。同感だな。	y
