# Supplementary material
Source: ML conference proceedings conference paper supplement (https://aclanthology.org/2022.eval4nlp-1.9)
Supplement: SupplementaryMaterial [file 1002.xlsx]

## Sheet: Sheet1
person	source	translation	evaluation: is this a good translation?
person 1	hi how are you ?	元気か ？	y
person 2	i am good thanks for asking , and you ?	私は、あなたとあなたに感謝していますか ？	n
person 1	i am good i was just eating my favorite , pizza ! !	私はちょうど私のお気に入りのピザを食べていた ！	n
person 2	yum ! i love veggie pizza ! ! do you have any hobbies ?	ピザが好きなの何か食べる ？	n
person 1	no i do not but i love thierry henry .	いいえでも大好きよヘンリーは大好き	n
person 2	i am not sure who that is . i am currently in art school .	誰なのかわからないわ今は美術学校よ	y
person 1	oh that is great , i took art at standford , how do you like it ?	いいわねどう ？	n
person 2	i love it ! my favorite medium is acrylics and painting is by far my favorite class .	大好きよ薬と油絵は私の好きなクラスで一番好きよ	n
person 1	oh acrylics are awesome , my wife is teaching our 4 year old son to paint with them .	妻は ４ 歳の息子と絵を描いて絵を描いてるの	n
person 2	that is wonderful ! i hope to paint murals one day .	素敵だわいつか絵を描いてあげたいわ	n
person 1	maybe you could paint a mural of thierry henry , if we ever find out who he is .	ヘンリー・ヘンリーの色素を描けば誰かわかるかもしれない	n
person 2	maybe ! ! i am a blonde , so it would not surprise me if the answer was obvious .	金髪かもしれないから答えになってくれないか	n
person 1	nope it is not obvious to me and i m bald .	私とハゲには見えないわ	n
person 2	ha ha ! it was nice chatting with you !	話せて良かったわ ！	y
