# Supplementary material
Source: ML conference proceedings conference paper supplement (https://aclanthology.org/2022.eval4nlp-1.9)
Supplement: SupplementaryMaterial [file 1002.xlsx]

## Sheet: Sheet1
person	source	translation	evaluation: is this a good translation?
person 1	hi how are you ?	こんにちは、お元気ですか？	y
person 2	i am good thanks for asking , and you ?	おかげさまで元気です、あなたは？	y
person 1	i am good i was just eating my favorite , pizza ! !	僕も元気です。大好物のピザを食べてたとこなんだ！！	y
person 2	yum ! i love veggie pizza ! ! do you have any hobbies ?	美味しそう！私は野菜ピザが大好きです！あなたにはなにか趣味がありますか？	y
person 1	no i do not but i love thierry henry .	いや、ないよ。でもティエリ・アンリが大好きなんだ。	y
person 2	i am not sure who that is . i am currently in art school .	それ、誰なのかよくわかりません。私は今美術学校に通ってます。	y
person 1	oh that is great , i took art at standford , how do you like it ?	あーそれは素晴らしいね、僕はスタンフォードで美術を専攻したよ、学校はどう？	y
person 2	i love it ! my favorite medium is acrylics and painting is by far my favorite class .	最高ですよ！私の好きな素材はアクリル絵の具で、絵画はダントツで私のお気に入りの授業です。	y
person 1	oh acrylics are awesome , my wife is teaching our 4 year old son to paint with them .	あーアクリル絵の具は素晴らしいね、妻が4歳の息子にアクリル絵の具を使った描き方を教えているよ。	y
person 2	that is wonderful ! i hope to paint murals one day .	それはいいですね！いつか壁画を描いてみたいんです！	y
person 1	maybe you could paint a mural of thierry henry , if we ever find out who he is .	ティエリ・アンリの壁画を描いたら良いかもよ、もし彼が誰か分かったら。	y
person 2	maybe ! ! i am a blonde , so it would not surprise me if the answer was obvious .	たぶんね！！私は金髪なんで、その答えが超簡単なものであったとしても不思議はないですね。	y
person 1	nope it is not obvious to me and i m bald .	いや、すぐに分かるようなものじゃないし、僕はハゲだよ。	y
person 2	ha ha ! it was nice chatting with you !	はは！あなたとチャットできて楽しかったです！	y
