# Supplementary material
Source: ML conference proceedings conference paper supplement (https://aclanthology.org/2022.eval4nlp-1.9)
Supplement: SupplementaryMaterial [file 1003.xlsx]

## Sheet: Sheet1
person	source	translation	evaluation: is this a good translation?
person 1	hello how are you today ?	今日はどう ？	n
person 2	good , how are you doing ?	調子はどうだ ？	n
person 1	i am doing well ! any plans this weekend ?	週末の計画はどうだ ？	n
person 2	yea , there is a muse concert that i am going to .	コンサートの練習があるんだ	n
person 1	really ? never heard of it . do explain	聞いたことないな説明してくれ	n
person 2	they are an english rock band that play really cool music .	彼らは本当にクールな音楽演奏バンドなんだ	n
person 1	interesting i might have to check it out . so what hobbies do you have ?	これを見てみないと何を持ってるんだ ？	n
person 2	i just became a vegan last year . its working out really well .	去年はベニガンになったからうまくいった	n
person 1	i have considered that as a healthy life style . is it hard ?	健康スタイルとして考えてみたんだつらいかな ？	n
person 2	not really , its like dieting , you just need to stay conscious .	会った時のように意識を保つ必要がある	n
person 1	well that is good to know . i have my own experiences with diets	それは良かった自分の経験を経験した	n
person 2	oh really what kinds ? i am studying nutrition in college	大学で勉強してるんだ	n
person 1	pale diet , low carb etc . it hard to keep up with it while travelling international	顔色が悪くて外国旅行の間は退屈でね	n
person 2	why do you travel all the time ?	なぜいつも旅してる ？	y
