# Supplementary material
Source: ML conference proceedings conference paper supplement (https://aclanthology.org/2022.eval4nlp-1.9)
Supplement: SupplementaryMaterial [file 1003.xlsx]

## Sheet: Sheet1
person	source	translation	evaluation: is this a good translation?
person 1	hello how are you today ?	こんにちは、元気ですか？	y
person 2	good , how are you doing ?	元気です、あなたは？	y
person 1	i am doing well ! any plans this weekend ?	僕も元気にしてるよ！この週末はなにか予定があるの？	y
person 2	yea , there is a muse concert that i am going to .	はい、ミューズのコンサートに行く予定なんです。	y
person 1	really ? never heard of it . do explain	そうなんだ？聞いたことないな。説明してよ。	y
person 2	they are an english rock band that play really cool music .	イギリスのロックバンドで、とてもかっこいい音楽を演奏するんですよ。	y
person 1	interesting i might have to check it out . so what hobbies do you have ?	興味深いね。チェックしてみようかな。ところで君の趣味は何？	y
person 2	i just became a vegan last year . its working out really well .	私は去年ヴィーガンになったばかりなんです。とてもいい感じです。	y
person 1	i have considered that as a healthy life style . is it hard ?	健康的なライフスタイルだと思うよ。大変かい？	y
person 2	not really , its like dieting , you just need to stay conscious .	そうでもないです、ダイエットみたいなもので、ただ自覚し続ける必要はありますね。	y
person 1	well that is good to know . i have my own experiences with diets	ああ、それは良いことを聞いた。僕自身ダイエット経験があるから。	y
person 2	oh really what kinds ? i am studying nutrition in college	あーそうなんですか、どんな種類のですか？私は大学で栄養学を勉強してるんです。	y
person 1	pale diet , low carb etc . it hard to keep up with it while travelling international	パレオ・ダイエット、低炭水化物とか。海外旅行中は続けるのが難しいんだよね。	y
person 2	why do you travel all the time ?	どうしていつも旅行しているんですか？	y
