# Supplementary material
Source: ML conference proceedings conference paper supplement (https://aclanthology.org/2022.eval4nlp-1.9)
Supplement: SupplementaryMaterial [file 1006.xlsx]

## Sheet: Sheet1
person	source	translation	evaluation: is this a good translation?
person 1	hi what are you up to ?	こんにちは、何してるの？	y
person 2	just watching game of thrones . how about you ?	ゲーム・オブ・スローンズを観てました。あなたは？	y
person 1	great show . i would fit in on there . always say i meant to be a prince haha	素晴らしい番組だね。僕ならあそこに馴染めるだろうな。自分はプリンスになるはずだったといつも言ってるんだ、はは。	y
person 2	lol i love scifi fiction stuff so it works for me . are you in school ?	（笑）SF物が大好きなので、僕も馴染めますよ。あなたは学生ですか？	y
person 1	nope . i am a literal basement dweller . mom pays for everything . pretty sweet deal	いや。僕は正真正銘のひきこもりなんだ。お母さんが全部払ってくれる。かなりおいしい話だよ。	y
person 2	nice ! i still live at home too , just started online classes at a community college .	良いですね！僕もまだ実家に住んでます、コミュニティ・カレッジでオンラインクラスを始めたばかりなんです。	y
person 1	how are those going ? do you have free time for fun ?	どんな感じ？趣味の時間はあるの？	y
person 2	not too bad . i always make time to fun , mostly reading . any hobbies ?	悪くないですよ。僕はいつも趣味の時間を作るようにしてます、主に読書ですが。なにか趣味は？	y
person 1	i play dungeons and dragons and eat tons of nachos	ダンジョンズ・アンド・ドラゴンズをやったり、ナチョスを大食いしてるよ。	y
person 2	nice ! i love nachos but spagetti would probably have to be my favorite .	良いね！僕もナチョスは大好きですが、多分スパゲッティが好物かな。	y
person 1	spaghetti is pretty dope too	スパゲッティもかなり美味いよな。	y
person 2	what state do you live in ?	あなたはどこの州に住んでますか？	y
