# Supplementary material
Source: ML conference proceedings conference paper supplement (https://aclanthology.org/2022.eval4nlp-1.9)
Supplement: SupplementaryMaterial [file 1006.xlsx]

## Sheet: Sheet1
person	source	translation	evaluation: is this a good translation?
person 1	hi what are you up to ?	何しに来たの ？	n
person 2	just watching game of thrones . how about you ?	ただのゲームだよ君はどうだ ？	n
person 1	great show . i would fit in on there . always say i meant to be a prince haha	素晴らしいショーになるといつも王子様になるんだ	n
person 2	lol i love scifi fiction stuff so it works for me . are you in school ?	僕は小説が大好きだから学校で働いてるの ？	n
person 1	nope . i am a literal basement dweller . mom pays for everything . pretty sweet deal	私も家に住んでるのよママのためにお金を払ってるの	n
person 2	nice ! i still live at home too , just started online classes at a community college .	いい家に住んでるから大学でネットを始めたんだ	n
person 1	how are those going ? do you have free time for fun ?	楽しい時間はある ？	n
person 2	not too bad . i always make time to fun , mostly reading . any hobbies ?	悪くないわいつも楽しい時を過ごしてるの	n
person 1	i play dungeons and dragons and eat tons of nachos	地下牢とドラゴンとたくさん食べてるの	n
person 2	nice ! i love nachos but spagetti would probably have to be my favorite .	好きだけどスパゲッティは私のお気に入りかもしれないわ	n
person 1	spaghetti is pretty dope too	スパゲッティも麻薬中毒者だ	n
person 2	what state do you live in ?	あなたはどの州に住んでるの ？	y
