# Supplementary material
Source: ML conference proceedings conference paper supplement (https://aclanthology.org/2022.eval4nlp-1.9)
Supplement: SupplementaryMaterial [file 1008.xlsx]

## Sheet: Sheet1
person	source	translation	evaluation: is this a good translation?
person 1	hello , how are you today ?	こんにちは、今日はどうですか ？	y
person 2	not so great , my boyfriend is a dog , a regular harvey weinstein	彼氏は犬だし普通の犬だし	n
person 1	whats wrong with your boyfriend ?	彼氏と寝たいって ？	n
person 2	he wants to sleep with other people while he is with me	一緒にいる間に他の人と寝たいって	y
person 1	oh . i do not have a boyfriend even though i am in highschool . kick him out !	高校で彼氏もいないし彼を追い出して ！	n
person 2	i just do not care anymore . lucky for you , you are still so young	もう気にしないわまだ若いし	n
person 1	yeah but i wish i can move out and was i older sometimes	でも出て行ってもいいといいけど年を取ってたの	n
person 2	i used to say the same thing . now i wish i could go back in time !	同じことを言いたくてもう戻らないと ！	n
person 1	i work and sometimes still worry about money even though i am in school	私はまだ仕事をしていても学校でもお金を心配しています	n
person 2	i hate going to work , i want to punch my coworker in the face	仕事が嫌なの顔で顔を殴られたいの	n
person 1	haha , my close friend works with me so its fun . what your coworker do ?	お友達が一緒に仕事をしてくれたんだ	n
person 2	she slept with my boyfriend !	恋人と寝てたんだ ！	n
person 1	find a new job and break up with him !	新しい仕事を見つけて彼と別れたいんだ ！	n
person 2	you are so right ! i just want to be happy again , and find my soulmate	また幸せになりたいだけだ	n
person 1	you will be happy again ! your boyfriend is dumb though	また幸せになるわでも彼氏はバカなのよ	y
person 2	he is most certainly dumb , but i am dumber for putting up with his shenanigans .	彼は本当にバカなのよでも私は彼の性欲を我慢してるの	n
