# Supplementary material
Source: ML conference proceedings conference paper supplement (https://aclanthology.org/2022.eval4nlp-1.9)
Supplement: SupplementaryMaterial [file 1008.xlsx]

## Sheet: Sheet1
person	source	translation	evaluation: is this a good translation?
person 1	hello , how are you today ?	こんにちは、お元気ですか？	y
person 2	not so great , my boyfriend is a dog , a regular harvey weinstein	あまり元気じゃないの、私の彼氏がヤリチンで、完全にハーヴェイ・ワインスタインだから。	y
person 1	whats wrong with your boyfriend ?	あなたの彼氏、なにかやらかしたんですか？	y
person 2	he wants to sleep with other people while he is with me	私とつき合っているのに、他の人ともヤリたがるのよ。	y
person 1	oh . i do not have a boyfriend even though i am in highschool . kick him out !	あー。私には彼氏がいません、といっても私は高校生なんだけど。彼を追い出しちゃえ！	y
person 2	i just do not care anymore . lucky for you , you are still so young	私はもうどうでもいいわ。あなたはラッキーね、まだとっても若くて。	y
person 1	yeah but i wish i can move out and was i older sometimes	はい、でも時々、家を出たいとか大人だったら良かったのにと思いますよ。	y
person 2	i used to say the same thing . now i wish i could go back in time !	私も以前は同じことを言っていたわ。今は昔に戻れたら良いなと思うのよ！	y
person 1	i work and sometimes still worry about money even though i am in school	私はまだ学生なのに働いていて、時々はお金の心配もしますよ。	y
person 2	i hate going to work , i want to punch my coworker in the face	仕事に行くのは嫌だし、同僚の顔にパンチを食らわせたいわ。	y
person 1	haha , my close friend works with me so its fun . what your coworker do ?	はは、親友も一緒に働いているから楽しいんですけどね。同僚に何をされたんですか？	y
person 2	she slept with my boyfriend !	私の彼氏とヤッたのよ！	y
person 1	find a new job and break up with him !	新しい仕事を探して、彼とは別れましょうよ！	y
person 2	you are so right ! i just want to be happy again , and find my soulmate	あなたの言う通り！私はまた幸せになりたいだけなのよ、そしてソウルメイトをみつけるの。	y
person 1	you will be happy again ! your boyfriend is dumb though	また幸せになれますよ！だけど、あなたの彼氏って馬鹿ですね。	y
person 2	he is most certainly dumb , but i am dumber for putting up with his shenanigans .	彼は間違いなく馬鹿だけど、彼の悪さを我慢している私はもっと馬鹿なのよね。	y
