# Supplementary material
Source: ML conference proceedings conference paper supplement (https://aclanthology.org/2022.eval4nlp-1.9)
Supplement: SupplementaryMaterial [file 1011.xlsx]

## Sheet: Sheet1
person	source	translation	evaluation: is this a good translation?
person 1	hello hope you are having a good day	こんにちは、あなたは良い一日を過ごしていることを願っています	y
person 2	it is ok . i do not get much done unless i am at work	いいのよ仕事が忙しくて	n
person 1	i understand that i am studying hard in law school	学校で勉強が大変なのは分かっている	n
person 2	an education is a good thing to get . i never did .	教育は良いことだ絶対にしなかった	n
person 1	its never too late . do you have any pets ? i have a very loyal pug	あまり遅くないペットはいる ？	n
person 2	no . i do not get along with anyone even pets	いやペットだって一緒にいかないよ	n
person 1	do you like to shop ?	お店はどう ？	n
person 2	not especially . what year are you in law school ?	特に学校は何年 ？	n
person 1	i am a graduate student in new york	私は新しい学生です	n
person 2	how do you like new york ?	新しいトークはどう ？	n
person 1	i enjoy all the local shopping . i like to play sports in the park .	地元の買い物を楽しんでるんだ公園でスポーツをしたいんだ	n
person 2	what sports do you play ?	スポーツは ？	n
person 1	basketball mostly and ultimate . do you play any sports ?	バスケと完全なスポーツは好きか ？	n
person 2	i used to play football but now am too unhealthy .	フットボールをしてたけど今は健康すぎて	n
person 1	hope you feel better . i love football too	気分が良くなったらいいけどフットボールも大好きよ	n
person 2	what team do you like ?	チームは何が好き ？	y
