# Supplementary material
Source: ML conference proceedings conference paper supplement (https://aclanthology.org/2022.eval4nlp-1.9)
Supplement: SupplementaryMaterial [file 1011.xlsx]

## Sheet: Sheet1
person	source	translation	evaluation: is this a good translation?
person 1	hello hope you are having a good day	こんにちは。良い1日を送ってらっしゃると良いですが。	y
person 2	it is ok . i do not get much done unless i am at work	まあまあだね。俺は仕事をしている時以外はあまり行動的じゃないんだ。	y
person 1	i understand that i am studying hard in law school	分かりますよ。僕はロー・スクールで猛勉強しているんです。	y
person 2	an education is a good thing to get . i never did .	教育を受けるのは良いことだよ。俺は全くやらなかったけど。	y
person 1	its never too late . do you have any pets ? i have a very loyal pug	遅すぎるってことはないですよ。なにかペットを飼っていますか？僕には忠犬のパグがいます。	y
person 2	no . i do not get along with anyone even pets	いや。俺は誰とも仲良くすることができないんだ、ペットでもね。	y
person 1	do you like to shop ?	買い物は好きですか？	y
person 2	not especially . what year are you in law school ?	特には。君はロー・スクールの何年生なの？	y
person 1	i am a graduate student in new york	僕はニューヨークにいる大学院生です。	y
person 2	how do you like new york ?	ニューヨークはどう？	y
person 1	i enjoy all the local shopping . i like to play sports in the park .	僕は地元でショッピングしまくってますよ。公園でスポーツをするのも好きです。	y
person 2	what sports do you play ?	君は何のスポーツをするの？	y
person 1	basketball mostly and ultimate . do you play any sports ?	主にバスケットボール、それにアルティメット。あなたはなにかスポーツをしますか？	y
person 2	i used to play football but now am too unhealthy .	以前はアメフトをやってたんだけど、今俺は体調が悪すぎて。	y
person 1	hope you feel better . i love football too	体調が良くなるといいですね。僕もアメフトが好きですよ。	y
person 2	what team do you like ?	君はどのチームが好き？	y
