# Supplementary material
Source: ML conference proceedings conference paper supplement (https://aclanthology.org/2022.eval4nlp-1.9)
Supplement: SupplementaryMaterial [file 1013.xlsx]

## Sheet: Sheet1
person	source	translation	evaluation: is this a good translation?
person 1	hi . how are you doing ?	調子はどう ？	n
person 2	pretty good . i just finished work . i work from home which is nice .	いいわ仕事は済んだから家から帰ってきたの	n
person 1	lucky . i just finished grilling some delicious salmon .	幸運にもおいしいサーモンを作っただけだ	n
person 2	that sounds yummy . my husband is grilling steak and asparagus but i hate asparagus .	それはいいわね夫はステーキとフライドポテトを焼くのが嫌いなの	n
person 1	steak sounds delicious , but i love fish more . have pets ?	ステーキっておいしいけどもっとペットが好きなのペットはいる ？	n
person 2	i do i have 10 cats . how about you ?	猫は １ ０ 匹いるわあなたは ？	y
person 1	i have a husky . he keeps me warm during the winter up here in the north .	私には空がある彼は北の冬の間ここで暖まってる	n
person 2	oh my husband wanted a husky . they look so furry and cuddly .	夫が空を欲しがっていましたとても背が高いように見えます	n
person 1	they are . so what do you do for fun ?	何を楽しんでるんだ ？	n
person 2	i go to the movies . emma stone is my favorite actress she has redhead like me .	映画に行くよジェマは僕のお気に入り女優だ	n
person 1	nice . i race rc cars for fun .	楽しい車だな	n
person 2	that sounds cool . do you have any kids ?	いいわ子供はいる ？	n
