# Supplementary material
Source: ML conference proceedings conference paper supplement (https://aclanthology.org/2022.eval4nlp-1.9)
Supplement: SupplementaryMaterial [file 1013.xlsx]

## Sheet: Sheet1
person	source	translation	evaluation: is this a good translation?
person 1	hi . how are you doing ?	こんにちは。お元気ですか？	y
person 2	pretty good . i just finished work . i work from home which is nice .	とても元気です。仕事を終えたばかりです。私は在宅で仕事をしているので気楽ですよ。	y
person 1	lucky . i just finished grilling some delicious salmon .	ラッキーですね。私は美味しい鮭をグリルし終えたところです。	y
person 2	that sounds yummy . my husband is grilling steak and asparagus but i hate asparagus .	美味しそう。うちの夫がステーキとアスパラガスをグリルしてるんですが、私はアスパラガスが大嫌いなんです。	y
person 1	steak sounds delicious , but i love fish more . have pets ?	ステーキも美味しそうですが、私は魚の方が好きですね。ペットは飼ってますか？	y
person 2	i do i have 10 cats . how about you ?	はい、猫が10匹います。あなたは？	y
person 1	i have a husky . he keeps me warm during the winter up here in the north .	私にはハスキーがいます。ここ北部の冬の間、犬がいるので温かいんですよ。	y
person 2	oh my husband wanted a husky . they look so furry and cuddly .	あー、夫はハスキーを欲しがっていますよ。ふわふわで抱き心地良さそうですね。	y
person 1	they are . so what do you do for fun ?	そうなんですよ。ところであなたの趣味は？	y
person 2	i go to the movies . emma stone is my favorite actress she has redhead like me .	映画を観に行くこと。エマ・ストーンが私の一番好きな女優です。私みたいに赤毛なんですよ。	y
person 1	nice . i race rc cars for fun .	良いですね。私は趣味でラジコンカーレースをしますよ。	y
person 2	that sounds cool . do you have any kids ?	それはかっこいいですね。お子さんはいますか？	y
