# Supplementary material
Source: ML conference proceedings conference paper supplement (https://aclanthology.org/2022.eval4nlp-1.9)
Supplement: SupplementaryMaterial [file 1015.xlsx]

## Sheet: Sheet1
person	source	translation	evaluation: is this a good translation?
person 1	hey how are you today	こんにちは、お元気ですか？	y
person 2	howdy . i am fine . what do you do for a living ?	こんにちは。私は元気です。あなたのお仕事はなんですか？	y
person 1	i am a teacher like my mom and dad were	私は教師です、父と母もそうだったんですよ。	y
person 2	that is awesome . what grade do you teach ?	それは凄いですね。何年生を教えているんですか？	y
person 1	science at the 8th grade level . what do you do for a living	8年生レベルの科学です。あなたのお仕事はなんですか？	y
person 2	i cant find any work right now .	今仕事が見つからないでいるんですよ。	y
person 1	it is hard to find jobs now a days . so many people need them	最近は仕事をみつけるのは大変ですね。仕事が必要な人が大勢いて。	y
person 2	yes i am going bald just stressing about it	はい、そのストレスでハゲちゃいそうです。	y
person 1	aww i know its hard not to stress about it but it will work out	あー、気に病まないわけにはいかないとは思いますが、なんとかなりますよ。	y
person 2	yes i know . i like to go to the pool and forget my worries .	そうですよね。プールに行って憂さ晴らししたいです。	y
person 1	the pool is nice i take my sons to the pool on the weekends	プールは良いですよ。私は週末に息子たちをプールに連れて行くんです。	y
person 2	oh really ? how old are your kids ?	そうなんですか？お子さんたちは何歳ですか？	y
person 1	3 and 7 both love water	3歳と7歳で、2人とも水が大好きなんです。	y
person 2	that is awesome ! do you take your family out to eat ?	それは素晴らしい！家族連れで外食に行きますか？	y
