# Supplementary material
Source: ML conference proceedings conference paper supplement (https://aclanthology.org/2022.eval4nlp-1.9)
Supplement: SupplementaryMaterial [file 1015.xlsx]

## Sheet: Sheet1
person	source	translation	evaluation: is this a good translation?
person 1	hey how are you today	今日はどうしてる ？	n
person 2	howdy . i am fine . what do you do for a living ?	私は元気よ何をしてるの ？	n
person 1	i am a teacher like my mom and dad were	私は母とパパみたいな教師なの	n
person 2	that is awesome . what grade do you teach ?	すごいわね学校は何を教えてるの ？	n
person 1	science at the 8th grade level . what do you do for a living	8 年生の科学レベルでは生きるために何をしている ？	n
person 2	i cant find any work right now .	今は仕事が見つからない	y
person 1	it is hard to find jobs now a days . so many people need them	仕事を見つけるのは大変だ多くの人が必要なんだ	n
person 2	yes i am going bald just stressing about it	はい、私はただ髪を磨くだけです	n
person 1	aww i know its hard not to stress about it but it will work out	ストレスは良くないけどうまくいくわ	n
person 2	yes i know . i like to go to the pool and forget my worries .	プールに行きたいのはわかってる心配しないで	n
person 1	the pool is nice i take my sons to the pool on the weekends	プールは息子を週末プールに連れて行く	n
person 2	oh really ? how old are your kids ?	子供はいくつだ ？	n
person 1	3 and 7 both love water	3 つと 7 つの水と 7 つの愛	n
person 2	that is awesome ! do you take your family out to eat ?	素晴らしい家族を食事に連れてったのか ？	n
