# Supplementary material
Source: ML conference proceedings conference paper supplement (https://aclanthology.org/2022.eval4nlp-1.9)
Supplement: SupplementaryMaterial [file 1022.xlsx]

## Sheet: Sheet1
person	source	translation	evaluation: is this a good translation?
person 1	hello , how are you today ?	こんにちは今日はどうですか ？	y
person 2	i am good . i speak two different languages .	私は元気です、私は 2 つの言語を話しています	n
person 1	wow , that is impressive . i teach first grade and i only know one language .	すごいわ最初の年を教えたのは言語だけ	n
person 2	that is nice that you are a teacher . i never finished high school .	高校は卒業したことがないわ	n
person 1	that is all right , you can always get your ged .	いいのよいつでもあなたはいつでも引っかかるわ	n
person 2	i would like to be a teacher someday .	いつか先生になりたいわ	y
person 1	that is great ! do you have any children ? my little girl is 3 .	いい子が ３ 人いるわね	n
person 2	i do not have children yet . i spend my time reading .	まだ子供はいないわ私の時間を読んでるの	n
person 1	that sounds nice and peaceful . i read my bible quite a bit .	それはいいわね少し読んだわ	n
person 2	that is nice that you read the bible . i would like to do that .	聖書を読んでくれてよかった	n
person 1	i learned as a child . my dad has always preached and i have always been in church .	子供の頃から父はいつも教会にいた	n
person 2	that is good . we both have been reading since a young age .	いいわ若い頃から読んでたの	n
person 1	that is very good . what is your favorite color ? mine is purple .	いい色だわあなたの好きな色は何色 ？	n
person 2	my favorite color is blue . i like purple as well .	私の好きな色はブルー私も紫が好きなの	y
person 1	blue is very pretty . what do you do for fun ?	青はきれいだ楽しんでるか ？	n
person 2	other than read , not much . what do you do for fun ?	読むほどじゃない何を楽しんでるの ？	n
