# Supplementary material
Source: ML conference proceedings conference paper supplement (https://aclanthology.org/2022.eval4nlp-1.9)
Supplement: SupplementaryMaterial [file 1022.xlsx]

## Sheet: Sheet1
person	source	translation	evaluation: is this a good translation?
person 1	hello , how are you today ?	こんにちは、お元気ですか？	y
person 2	i am good . i speak two different languages .	元気です。私は二か国語を話します。	y
person 1	wow , that is impressive . i teach first grade and i only know one language .	おお、それは凄いですね。私は一年生を教えていて、一つの言語しか知りません。	y
person 2	that is nice that you are a teacher . i never finished high school .	先生だなんて素晴らしいですね。私は高校も終えなかったんです。	y
person 1	that is all right , you can always get your ged .	それでも大丈夫ですよ、いつでも高校卒業認定は取れるんですから。	y
person 2	i would like to be a teacher someday .	いつか私も教師になりたいです。	y
person 1	that is great ! do you have any children ? my little girl is 3 .	それは素晴らしいです！あなたにお子さんはいますか？私の娘は３歳です。	y
person 2	i do not have children yet . i spend my time reading .	私にはまだ子供はいません。本を読んで過ごすんですよ。	y
person 1	that sounds nice and peaceful . i read my bible quite a bit .	それは素敵だし平和ですね。私もよく聖書を読みますよ。	y
person 2	that is nice that you read the bible . i would like to do that .	聖書を読むなんて素敵ですね。私もやってみたいです。	y
person 1	i learned as a child . my dad has always preached and i have always been in church .	子供のころに身につけたんです。私の父がいつも伝道していて、私はいつも教会にいましたからね。	y
person 2	that is good . we both have been reading since a young age .	それは良かったですね。私たち２人とも小さいころから読書をしてきたんですね。	y
person 1	that is very good . what is your favorite color ? mine is purple .	とても良いことですね。あなたの一番好きな色はなんですか？私は紫が好きです。	y
person 2	my favorite color is blue . i like purple as well .	一番好きな色は青です。紫も好きですけどね。	y
person 1	blue is very pretty . what do you do for fun ?	青はとても綺麗ですね。あなたの趣味は？	y
person 2	other than read , not much . what do you do for fun ?	読書以外には特に。あなたのご趣味はなんですか？	y
