# Supplementary material
Source: ML conference proceedings conference paper supplement (https://aclanthology.org/2022.eval4nlp-1.9)
Supplement: SupplementaryMaterial [file 1023.xlsx]

## Sheet: Sheet1
person	source	translation	evaluation: is this a good translation?
person 1	tell me about yourself , what is your profession ?	自分の仕事は ？	n
person 2	i am a stay at home mom . how about you ?	ママの家で待ってるわあなたは ？	n
person 1	i am a writer for a local newspaper	地元新聞社の作家です	n
person 2	i should read more newspapers . i tend to stick with movies .	もっと新聞を読んで映画を撮るべきだ	n
person 1	what movies do you like ?	どんな映画が好きなの ？	y
person 2	i do not have a lot of energy so i watch a lot of all types .	多くのエネルギーを持っていないので、私は多くの種類の種類の種類を見ることができません。	n
person 1	you should try doing some yoga , i find it helps me feel more energetic .	オメガを試してみた方がいいわ私はもっとデネリガを感じるのよ	n
person 2	i also eat way too much fast food . that might help too .	もっと早く食べすぎたのよそれも助けになるかも	n
person 1	whats your favorite fast food place ? i am always looking for new things to write about .	好きな料理を探してるんだ新しいものを書くためにね	n
person 2	rdoba is pretty good . i love mexican food in general	ラバはうまいメキシコ料理が大好きだ	n
person 1	is rdoba a food chain ?	カリバは食物連鎖の鎖 ？	n
person 2	yeah , sort of like chipotle .	ああ、そうだな、そうだな	n
