# Supplementary material
Source: ML conference proceedings conference paper supplement (https://aclanthology.org/2022.eval4nlp-1.9)
Supplement: SupplementaryMaterial [file 1023.xlsx]

## Sheet: Sheet1
person	source	translation	evaluation: is this a good translation?
person 1	tell me about yourself , what is your profession ?	あなたについて教えて下さい、お仕事はなんですか？	y
person 2	i am a stay at home mom . how about you ?	私は専業ママです。あなたは？	y
person 1	i am a writer for a local newspaper	私は地元新聞社で記者をしています。	y
person 2	i should read more newspapers . i tend to stick with movies .	私ももっと新聞を読んだほうがいいわね。映画を観ることの方が多いんです。	y
person 1	what movies do you like ?	どんな映画がお好きですか？	y
person 2	i do not have a lot of energy so i watch a lot of all types .	私はそれほど気力がないので、いろんなタイプのものをたくさん観るんです。	y
person 1	you should try doing some yoga , i find it helps me feel more energetic .	ちょっとヨガをやってみたらどうですか？私はヨガで気力が増すような気がします。	y
person 2	i also eat way too much fast food . that might help too .	それに私はファストフートをすごく食べすぎてしまうんですよ。ヨガが効くかもしれないですね。	y
person 1	whats your favorite fast food place ? i am always looking for new things to write about .	あなたの一番好きなファストフード店はどこですか？私はいつも新しい記事のネタを探しているんです。	y
person 2	rdoba is pretty good . i love mexican food in general	キュードバは結構おいしいですよ。私はメキシコ料理はたいてい好きなんです。	n
person 1	is rdoba a food chain ?	キュードバはチェーン店なんですか？	n
person 2	yeah , sort of like chipotle .	そう、チポトレみたいな感じです。	y
