# Supplementary material
Source: ML conference proceedings conference paper supplement (https://aclanthology.org/2022.eval4nlp-1.9)
Supplement: SupplementaryMaterial [file 1024.xlsx]

## Sheet: Sheet1
person	source	translation	evaluation: is this a good translation?
person 1	hey how are you today ?	こんにちは、お元気ですか？	y
person 2	hey i am ok . i am just extremely tired right nw	こんにちは、まあまあです。今超疲れてるとこなんです。	y
person 1	oh why are you so tired ?	えーっ、なんでそんなに疲れてるんですか？	y
person 2	just been working a lot . been with the company for 7 years now and i am burnt out	働きすぎなだけです。この会社で働いて今７年目なんですが、うんざりしています。	y
person 1	that is a shame , what do you do ?	それはお気の毒に。何の仕事をしてるんですか？	y
person 2	financial advisor . i just sit at my desk and listen to my country station	ファイナンシャル・アドバイザーです。ただ机に座ってカントリー音楽のラジオを聴くだけです。	y
person 1	oh that is not so bad . i work as an accountant , freelance mostly .	あれ、そんなに悪くないじゃないですか。私は会計士として働いていますが、だいたいフリーランスです。	y
person 2	that sounds way better lol i enjoy reading as well	それはかなりマシだと思うけど（笑）私は読書も好きです。	y
person 1	do you like to travel ?	あなたは旅行は好きですか？	y
person 2	i love to travel . but i do not do enough of it unfortunately	旅行は大好きですが、残念ながら思うようには旅行に行けません。	y
person 1	that stinks . i goes to fl once a week for a week .	それは最悪ですね。私は週に一度、一週間フロリダに行くんです。	y
person 2	that is awesome . and confusing lol fl once a week for a week ? so you are there everyday . . . . haha	それは凄いね、そしてややこしい（笑）週に一度一週間フロリダに行くって？つまり毎日フロリダにいるんだね・・・。はは。	y
person 1	ahahah sorry my ocd was flaring up . i mean once a year .	あははは。ごめんなさい、強迫性障害が再発しちゃって。年に一度という意味です。	y
person 2	oh ok ahahah . no worries . whats your favorite food ?	なるほどね、あははは。気にしないでね。あなたの一番好きな食べ物はなんですか？	y
person 1	fish and chips , what about you ?	フィッシュ・アンド・チップスです。あなたは？	y
person 2	i loooove me a good kale salad . i am vegan so	私は美味しいケール・サラダが大大大好きです。私はヴィーガンなので。	y
