# Supplementary material
Source: ML conference proceedings conference paper supplement (https://aclanthology.org/2022.eval4nlp-1.9)
Supplement: SupplementaryMaterial [file 1024.xlsx]

## Sheet: Sheet1
person	source	translation	evaluation: is this a good translation?
person 1	hey how are you today ?	今日はどうだ ？	n
person 2	hey i am ok . i am just extremely tired right nw	大丈夫だよ疲れただけだ	n
person 1	oh why are you so tired ?	どうして疲れてるの ？	y
person 2	just been working a lot . been with the company for 7 years now and i am burnt out	会社は 7 年間働いてきたのに燃えてしまったんだ	n
person 1	that is a shame , what do you do ?	残念だが何をしてる ？	n
person 2	financial advisor . i just sit at my desk and listen to my country station	私のデスクに座って聞いてくれ	n
person 1	oh that is not so bad . i work as an accountant , freelance mostly .	それは悪くない会計士として働いてるんだ	n
person 2	that sounds way better lol i enjoy reading as well	私も読んだ方がいいわ	n
person 1	do you like to travel ?	旅行が好きなの ？	y
person 2	i love to travel . but i do not do enough of it unfortunately	旅行が好きなんだ残念だけどあまりやりたくないんだ	n
person 1	that stinks . i goes to fl once a week for a week .	臭かった一週間後には一週間後に行くんだ	n
person 2	that is awesome . and confusing lol fl once a week for a week ? so you are there everyday . . . . haha	すごい一週間だったのに毎日混乱してるのか ？	n
person 1	ahahah sorry my ocd was flaring up . i mean once a year .	一年前は悪かったよ	n
person 2	oh ok ahahah . no worries . whats your favorite food ?	気にしないで食事は好き ？	n
person 1	fish and chips , what about you ?	魚とチップは ？	n
person 2	i loooove me a good kale salad . i am vegan so	おいしいサラダをくれないか ？	n
