# Supplementary material
Source: ML conference proceedings conference paper supplement (https://aclanthology.org/2022.eval4nlp-1.9)
Supplement: SupplementaryMaterial [file 1027.xlsx]

## Sheet: Sheet1
person	source	translation	evaluation: is this a good translation?
person 1	hi . . how are you today	こんにちは今日はどうですか ？	y
person 2	pretty good ! my name is , ironically , shelly . what about you ?	いいわ私の名前はマーリーあなたは ？	n
person 1	i am sandy . . how is ur weekend going	週末はどうだ ？	n
person 2	great ! we had perfect weather for horseback riding and i went to a cheese tasting . you ?	馬に乗ってチーズを食べに行ったんです	n
person 1	nothing much today . . i am jst waiting for something interesting to happen	今日は何もない今日は楽しみたいことがあるんだ	n
person 2	why not join a volunteer group ? we always need new volunteers at my non profit !	私の利益で新しいボランティアが必要なのよ ！	n
person 1	good to know . . which group you are working for ? ?	知ってててて良かった誰の仕事なの ？	n
person 2	make your garden grow , its dedicated to helping children in impoverished areas !	あなたの庭を成長させ、子供たちを貧しい地域で助けたいと願っています	y
person 1	great idea . . i wish i can start	いい考えね始めたいわ	y
person 2	no time like today ! what do you do for work ?	今日は仕事は何をしてるの ？	n
person 1	i work for a it company . .	会社のためだ	n
person 2	that sounds interesting . do you go out to eat often ?	面白いなよく食べに行ったか ？	n
person 1	not much of a foodie . . but love to travel	死にたくないけど旅行が好きなの	n
person 2	oh , i love food , except shellfish . where have you traveled ?	魚以外の魚以外は好きなのどこへ行ってたの ？	n
