# Supplementary material
Source: ML conference proceedings conference paper supplement (https://aclanthology.org/2022.eval4nlp-1.9)
Supplement: SupplementaryMaterial [file 1027.xlsx]

## Sheet: Sheet1
person	source	translation	evaluation: is this a good translation?
person 1	hi . . how are you today	こんにちは・・・。お元気ですか？	y
person 2	pretty good ! my name is , ironically , shelly . what about you ?	とても元気です！私の名前は皮肉にもシェリーです。あなたは？	y
person 1	i am sandy . . how is ur weekend going	私はサンディーです・・・。今週はいかがお過ごしですか？	y
person 2	great ! we had perfect weather for horseback riding and i went to a cheese tasting . you ?	絶好調です！乗馬にぴったりのお天気に恵まれたし、私はチーズの試食会に行ったんですよ。あなたは？	y
person 1	nothing much today . . i am jst waiting for something interesting to happen	今日は特になにも・・・。なにか面白いことが起こるのを待っているだけなんです。	y
person 2	why not join a volunteer group ? we always need new volunteers at my non profit !	ボランティアのグループに参加してみたら？私の非営利団体ではいつも新しいボランティアが必要なんですよ。	y
person 1	good to know . . which group you are working for ? ?	良いことを聞きました・・・。あなたはどちらの団体で働いているんですか？	y
person 2	make your garden grow , its dedicated to helping children in impoverished areas !	メイク・ユア・ガーデン・ナウです、恵まれない地域の子供たちを助けることに取り組んでいます！	n
person 1	great idea . . i wish i can start	素晴らしい理念ですね・・・。私も始められたらな。	y
person 2	no time like today ! what do you do for work ?	思い立ったが吉日！お仕事はなにをしているんですか？	y
person 1	i work for a it company . .	私はIT会社で働いています・・・。	y
person 2	that sounds interesting . do you go out to eat often ?	それは面白そうですね。あなたはよく外食しますか？	y
person 1	not much of a foodie . . but love to travel	そんなに食通じゃないんで・・・。旅行は大好きですけど。	y
person 2	oh , i love food , except shellfish . where have you traveled ?	そうなんだ、私は食べ物が大好きです、貝類を除いては。あなたは今までにどこに旅行しましたか？	y
