# Supplementary material
Source: ML conference proceedings conference paper supplement (https://aclanthology.org/2022.eval4nlp-1.9)
Supplement: SupplementaryMaterial [file 1033.xlsx]

## Sheet: Sheet1
person	source	translation	evaluation: is this a good translation?
person 1	hello , how are you doing ?	こんにちは、お元気ですか？	y
person 2	hi i am good . just came back from a workout an hour ago	こんにちは、私は元気です。１時間前にワークアウトから戻ったばかりです。	y
person 1	very nice . what did you do ?	素晴らしいですね。なにをしたんですか？	y
person 2	today i focused primarily on my upper body but i also hit the treadmill	今日は主に上半身に集中しましたが、トレッドミルもやりましたよ。	y
person 1	do not forget to have a leg day ! ll . where do you work ?	足を鍛える日も忘れないでくださいね！（笑）あなたはどこで働いているんですか？	y
person 2	haha true . i am a professional sports car driver and in my spare time , a triathlete	はは、その通り。私はプロのスポーツカー・ドライバーで、空いた時間にはトライアスロンの選手なんです。	y
person 1	wow , that would be a cool career . i just started interning at google .	うわー、かっこいい職業ですね。僕はグーグルでインターンを始めたばかりです。	y
person 2	it is . nice , how is it so far ?	そうなの？良いね。これまでのところどんな感じ？	y
person 1	its fascinating . just very busy never a dull moment for sure .	素晴らしいです。ただとても忙しいです、退屈な瞬間なんてまずないです。	y
person 2	interesting , reminds me of life at home with my four daughters , never a dull moment	興味深いね、私の四人の娘たちとの家庭生活を思わせるね、退屈な瞬間が全くないから。	y
person 1	4 daughters ? yeah , that would be insanity .	娘さんが４人？ああ、それは気が狂うでしょう。	y
person 2	haha , its like that at times . but that goodness for board games	はは。時々はそんな感じだよ。でもボードゲームがあって良かった！	y
