# Supplementary material
Source: ML conference proceedings conference paper supplement (https://aclanthology.org/2022.eval4nlp-1.9)
Supplement: SupplementaryMaterial [file 1033.xlsx]

## Sheet: Sheet1
person	source	translation	evaluation: is this a good translation?
person 1	hello , how are you doing ?	やあ元気かい ？	y
person 2	hi i am good . just came back from a workout an hour ago	ええ仕事から戻ってきたばかりで	n
person 1	very nice . what did you do ?	いいわね何をしたの ？	n
person 2	today i focused primarily on my upper body but i also hit the treadmill	今日は頭の上で集中していたが...	n
person 1	do not forget to have a leg day ! ll . where do you work ?	足を忘れないで仕事はどこだ ？	n
person 2	haha true . i am a professional sports car driver and in my spare time , a triathlete	プロの運転手だしプロのスポーツ選手なんだ	n
person 1	wow , that would be a cool career . i just started interning at google .	それはいいキャリアになりそうだちょうどグスタングで始めたとこだ	n
person 2	it is . nice , how is it so far ?	いいわねどれくらい遠いの ？	n
person 1	its fascinating . just very busy never a dull moment for sure .	面白そうだな今までは退屈な瞬間じゃない	n
person 2	interesting , reminds me of life at home with my four daughters , never a dull moment	面白い話だが 4 人の娘と住んでることを思い出すと退屈な瞬間はない	n
person 1	4 daughters ? yeah , that would be insanity .	4 人の娘って正気か ？	n
person 2	haha , its like that at times . but that goodness for board games	（ 吉森 ） 楽しそうな試合だったけど大変だったー	n
