# Supplementary material
Source: ML conference proceedings conference paper supplement (https://aclanthology.org/2022.eval4nlp-1.9)
Supplement: SupplementaryMaterial [file 1034.xlsx]

## Sheet: Sheet1
person	source	translation	evaluation: is this a good translation?
person 1	hello ! what do you like to do for fun ?	こんにちは！あなたのご趣味は？	y
person 2	i get up at 4am for work haha , on my down time i smoke	俺は仕事のため午前４時に起きるんだ、はは、休憩時間にはタバコを吸うよ。	y
person 1	wow , too early ! i collect rocks and dragon ball z dolls .	うわ、早すぎですよ！私は石やドラゴンボールＺの人形を集めてます。	y
person 2	cool , i use to love dragon ball z , still do , just no time	良いね、俺も以前はドラゴンボールＺが大好きだったよ、今も好きだけど時間がなくてね。	y
person 1	i have too much time . what do you do for a living ?	私は時間がありすぎですよ。お仕事はなにをなさっているんですか？	y
person 2	work in warehouse	倉庫で働いてるよ。	y
person 1	that is interesting . are you active at all ? i do sumba .	それは興味深いですね。なにか運動はしますか？私はズンバをやってます。	n
person 2	my job is very physical , what you do for living ?	俺の仕事は肉体労働だからね、君の仕事は？	y
person 1	i work in an art gallery , i love the big paintings we get there .	私は画廊で働いています、そこにある大きな絵画が大好きなんです。	y
person 2	that is pretty cool , i need to swith careers haha	それはかなりイケてるね、俺も仕事を変えないとな、はは。	y
person 1	i am big into collecting , but cannot afford paintings , i get to see them though !	私は収集にハマっているけど、絵画を買うほどの余裕はなくて、でも見ることはできますから！	y
person 2	well that is cool , at least your around something you enjoy	ああ、それは良いね、少なくとも君が好きなものに囲まれているんだから。	y
