# Supplementary material
Source: ML conference proceedings conference paper supplement (https://aclanthology.org/2022.eval4nlp-1.9)
Supplement: SupplementaryMaterial [file 1034.xlsx]

## Sheet: Sheet1
person	source	translation	evaluation: is this a good translation?
person 1	hello ! what do you like to do for fun ?	こんにちは何の用ですか ？	n
person 2	i get up at 4am for work haha , on my down time i smoke	（ 吉森 ） 俺は ４ ４ 年の仕事で ４ ４ 年働いてんだよ俺は煙を吸ってんだよ	n
person 1	wow , too early ! i collect rocks and dragon ball z dolls .	おっ早いな岩とドラゴンの人形を集めたんだよ	n
person 2	cool , i use to love dragon ball z , still do , just no time	いいぞ、俺はドラゴンボールが好きだがまだ時間がない	n
person 1	i have too much time . what do you do for a living ?	時間がない何のために生活してるんだ ？	n
person 2	work in warehouse	倉庫で働いてる	y
person 1	that is interesting . are you active at all ? i do sumba .	面白いな調子はどうだ ？	n
person 2	my job is very physical , what you do for living ?	私の仕事はとても肉体的で、あなたは何のために生きているのですか ？	n
person 1	i work in an art gallery , i love the big paintings we get there .	私は芸術画廊で働いている、私は巨大な絵を取得している。	n
person 2	that is pretty cool , i need to swith careers haha	（ 吉森 ） カッコいいですね （ 吉森 ） フハハハ... （ 吉森 ） フハハハ...	n
person 1	i am big into collecting , but cannot afford paintings , i get to see them though !	私は大捜索をしていますが、私は彼らを見ることができません、私は彼らを見ることができません ！	n
person 2	well that is cool , at least your around something you enjoy	それはクールです少なくとも、少なくとも、少なくとも、少なくともあなたの周りの何かを楽しんでいる	n
