# Supplementary material
Source: ML conference proceedings conference paper supplement (https://aclanthology.org/2022.eval4nlp-1.9)
Supplement: SupplementaryMaterial [file 1035.xlsx]

## Sheet: Sheet1
person	source	translation	evaluation: is this a good translation?
person 1	well hi there ! anything interesting going on ?	こんにちは！なにか面白い事はありますか？	y
person 2	oh i am just checking through photos that i took and editing . you ?	あ、自分が撮った写真をチェックしたり、編集したりしてただけです。あなたは？	y
person 1	i recently returned from london , so i have lots of photos to sort myself .	最近ロンドンから戻ったので、僕も整理しなくちゃいけない写真がたくさんあります。	y
person 2	oh my son has a soccer coach who is from london . what did you do there ?	あら、私の息子のサッカーコーチはロンドン出身なんですよ。あちらでどんなことをなさったんですか？	y
person 1	well , we went to a lot of churches i think i may be too religious lol	えーと、僕達はたくさんの教会に行きました。信心深すぎかもしれないですよね。（笑）	y
person 2	that is funny . i take photos of many things . i want to become well known !	面白いですね。私は色んな物の写真を撮るんです。有名になりたいんですよ！	y
person 1	that would be great ! i get agitated too often to want to be famous .	なれたら素敵ですね！僕は有名になりたくてよく暴れるんですよ。	y
person 2	oh do you have anger issues ? i am sorry that you are easily bothered .	あら、あなたはキレやすいんですか？癇が強いなんてお気の毒に。	y
person 1	i deal with it . my main anger seems to come when i have to eat green beans .	自分でなんとかしてますよ。僕の主な怒りは、インゲンを食べなくちゃいけない時に起こるみたいなんです。	y
person 2	i would suggest cutting out the green beans in that case .	その場合は、インゲンを食べないことをお勧めします。	y
person 1	consider it done ! i have to go soon , because my favorite game show is coming on .	了解しました！そろそろおいとましないと、僕の一番好きなクイズ番組が始まるので。	y
person 2	what show will you be watching ?	なんていう番組を観るんですか？	y
person 1	wheel of fortune lol ! i feel like i am learning all about you !	ホイール・オブ・フォーチュンです（笑）！僕はあなたのことが全て分かってきてるような気がするなあ！	y
person 2	wow , i had a colleague go on that show . he won a little bit of money !	あらまあ、私の同僚がその番組に出たことがあって、ちょっとだけ賞金を稼いだんですよ。	y
person 1	a little bit is better than nothing ! thanks for the little chat !	ちょっとだけでも全然なかったよりマシですよ！チャットしてくれてありがとうございました！	y
person 2	sure , i enjoyed talking with you .	どういたしまして、あなたとお話できて楽しかったです。	y
