# Supplementary material
Source: ML conference proceedings conference paper supplement (https://aclanthology.org/2022.eval4nlp-1.9)
Supplement: SupplementaryMaterial [file 1035.xlsx]

## Sheet: Sheet1
person	source	translation	evaluation: is this a good translation?
person 1	well hi there ! anything interesting going on ?	何か面白いことでも ？	n
person 2	oh i am just checking through photos that i took and editing . you ?	写真を調べてるんだけどあなたとエディを連れて行った写真を見てたのよ	n
person 1	i recently returned from london , so i have lots of photos to sort myself .	私は最近クローンから戻ってきたので写真がたくさんあります	n
person 2	oh my son has a soccer coach who is from london . what did you do there ?	息子は孤独から来たサッカーのコーチを持っていますそこで何をしたのですか ？	n
person 1	well , we went to a lot of churches i think i may be too religious lol	教会に行っても信仰深い宗教家になるかもしれない	n
person 2	that is funny . i take photos of many things . i want to become well known !	面白いことにたくさん写真を撮ったからよく知っておきたいわ ！	n
person 1	that would be great ! i get agitated too often to want to be famous .	それは良かったわ有名になりたいと思うわ	n
person 2	oh do you have anger issues ? i am sorry that you are easily bothered .	怒りの問題でもあるのか ？	n
person 1	i deal with it . my main anger seems to come when i have to eat green beans .	悪いけどグリーン豆を食べないと腹が立ってきた	n
person 2	i would suggest cutting out the green beans in that case .	緑の豆を切った方がいいわね	n
person 1	consider it done ! i have to go soon , because my favorite game show is coming on .	考えてみてすぐ行かないと大好きな試合が始まるから	n
person 2	what show will you be watching ?	何を見ているんだ ？	n
person 1	wheel of fortune lol ! i feel like i am learning all about you !	俺はお前の事を勉強しているんだ ！	n
person 2	wow , i had a colleague go on that show . he won a little bit of money !	俺は仲間がショーに出たんだ大金をもらったんだ ！	n
person 1	a little bit is better than nothing ! thanks for the little chat !	ちょっとお喋りしてくれてありがとう ！	n
person 2	sure , i enjoyed talking with you .	話せてよかったわ	n
