# Supplementary material
Source: ML conference proceedings conference paper supplement (https://aclanthology.org/2022.eval4nlp-1.9)
Supplement: SupplementaryMaterial [file 1038.xlsx]

## Sheet: Sheet1
person	source	translation	evaluation: is this a good translation?
person 1	hi there . how are ya ?	こんにちは元気ですか ？	y
person 2	hi i am pretty good . my allergies are really acting up today .	元気よアレルギーが今日の調子になったの	n
person 1	sorry to hear that . i always had bad allergies when i liven on my farm in kansas .	それは残念だわカンザスの農場ではいつもアレルギーがあって	n
person 2	i live on a farm too , a pig farm .	私も農場に住んでるブタの農場でね	y
person 1	mine is a horse farm . i love horses and horseback riding . do you like pigs ?	馬に乗って馬に乗って戻るブタは好きか ？	n
person 2	no . i do not like animals at all . i would rather live in a city .	動物は好きじゃない街で暮らしたい	y
person 1	sorry to hear that . do you have kids ?	子供はいるの ？	n
person 2	no i do not . do you ?	そうじゃないわよね ？	n
person 1	yep . three daughters . my house is crazy .	３ 人の娘がイカレてるわ	n
person 2	are you a vegetarian ? i am because of living on the pig farm .	ベジタリアンなの ？ 豚農場で生きてるからよ	n
person 1	no but i do not blame you . do you have any hobbies ?	あなたを責めたりしないわ	n
person 2	i like to do research on different cities . you ?	別の都市で研究したい君は ？	n
person 1	i go scuba diving with my wife a lot .	妻と一緒にダイビングしてくる	n
person 2	that sounds fun and adventurous .	楽しそうで冒険的な話だな	n
person 1	it really is . i live in detroit so we have to do it in the lake though .	本当にそうよ湖で生きるのよ	n
person 2	you should go to a tropical island and do it in the ocean .	海に行って海でやるべきだ	n
