# Supplementary material
Source: ML conference proceedings conference paper supplement (https://aclanthology.org/2022.eval4nlp-1.9)
Supplement: SupplementaryMaterial [file 1038.xlsx]

## Sheet: Sheet1
person	source	translation	evaluation: is this a good translation?
person 1	hi there . how are ya ?	やあ、元気？	y
person 2	hi i am pretty good . my allergies are really acting up today .	やあ、まあまあだね。今日はアレルギーがひどいんだ。	y
person 1	sorry to hear that . i always had bad allergies when i liven on my farm in kansas .	それは大変だ。カンザスの農場に住んでたとき、僕はずっと重度のアレルギーだった。	y
person 2	i live on a farm too , a pig farm .	僕も農場に住んでる、養豚場だけど。	y
person 1	mine is a horse farm . i love horses and horseback riding . do you like pigs ?	僕が住んでたのは馬牧場だ。馬と乗馬が大好きでね。君は豚が好きなの？	y
person 2	no . i do not like animals at all . i would rather live in a city .	いや、動物は全く好きじゃない。どちらかと言えば都会に住みたい。	y
person 1	sorry to hear that . do you have kids ?	それは残念だな。子供はいる？	y
person 2	no i do not . do you ?	いや、いない。君は？	y
person 1	yep . three daughters . my house is crazy .	いるよ。娘が３人。家の中はすごいことになってる。	y
person 2	are you a vegetarian ? i am because of living on the pig farm .	君はベジタリアンかい？僕はそうだ、家が養豚場だからね。	y
person 1	no but i do not blame you . do you have any hobbies ?	いや、違うよ、でもわかるな。何か趣味はある？	y
person 2	i like to do research on different cities . you ?	いろんな街を調べるのが好きでね。君は？	y
person 1	i go scuba diving with my wife a lot .	かみさんとよくスキューバダイビングに行く。	y
person 2	that sounds fun and adventurous .	それは楽しくてわくわくする。	y
person 1	it really is . i live in detroit so we have to do it in the lake though .	本当に楽しいよ。デトロイトに住んでるから、潜るのは湖だけど。	y
person 2	you should go to a tropical island and do it in the ocean .	南の島へ行って海で潜る方がいいね。	y
