# Supplementary material
Source: ML conference proceedings conference paper supplement (https://aclanthology.org/2022.eval4nlp-1.9)
Supplement: SupplementaryMaterial [file 1040.xlsx]

## Sheet: Sheet1
person	source	translation	evaluation: is this a good translation?
person 1	hi there ! how is it going ?	こんにちは！元気？	y
person 2	going good man got some system of a down cranked . love em .	元気だよ、うわあ、全身がしびれたよ。あいつら最高。	n
person 1	sod is a good band . ever been to a concert ?	S.O.D.はいいバンドだね。コンサートには行ったことある？	y
person 2	i go to every one i can . trying to get going in a local band .	行けるやつは全部行ってる。俺、地元のバンドで活動してるんだ。	y
person 1	similar style to sod ? what do you play ?	S.O.D.みたいな感じ？楽器は何を？	y
person 2	mom got me started on piano at 6 but now one of 9 guitars	６歳でおふくろにピアノをやらされたけど、今は９人いるギターの一人。	y
person 1	i learned guitar at one point . i cannot remember a single chord now	私、一時期ギターを習ってた。今ではコードなんて一つも思い出せないけど。	n
person 2	what do you do for a living ?	仕事は何をやってるの？	y
person 1	i am a writer . i do not currently work for a publishing firm	物書きよ。もう出版社には勤めてないけどね。	y
person 2	so you are freelancing now ?	じゃあ、今はフリーランス？	y
person 1	i just try to live simply until someone likes something i write	誰かが私の書いたものを気に入ってくれるまで質素に生活しようとしてるだけ。	n
person 2	kinda same as me . chill out , eat vegan and shred on guitar .	俺も似たようなもんだ。くつろいでヴィーガン料理を食べてギターの速弾りしたりね。	n
person 1	i could not do the whole vegan thing	私にはヴィーガンの生活は無理だわ。	y
person 2	its tough but if i touched a burger again my girlfriend would kill me	大変だよ、でもまたハンバーガーに触りでもしたら彼女に殺されるからね。	y
person 1	a vegan that would kill somebody . i do not believe that	人を殺すヴィーガン。そんなの信じられない。	y
person 2	when it comes to killing with vegans it is people before animals	ヴィーガンが殺すとなれば、動物の前に人間だよ。	y
