# Supplementary material
Source: ML conference proceedings conference paper supplement (https://aclanthology.org/2022.eval4nlp-1.9)
Supplement: SupplementaryMaterial [file 1040.xlsx]

## Sheet: Sheet1
person	source	translation	evaluation: is this a good translation?
person 1	hi there ! how is it going ?	こんにちは調子はどうですか ？	y
person 2	going good man got some system of a down cranked . love em .	いい男が沢山の興奮して好きになった	n
person 1	sod is a good band . ever been to a concert ?	パーティーは最高のバンドだ	n
person 2	i go to every one i can . trying to get going in a local band .	地元のバンドに入りたい	n
person 1	similar style to sod ? what do you play ?	同じスタイルなの ？	n
person 2	mom got me started on piano at 6 but now one of 9 guitars	ママは 6 時からピアノを教えてくれただが 9 時 1 人のギター奏者が 1 人	n
person 1	i learned guitar at one point . i cannot remember a single chord now	ギターを習った今は 1 つも覚えてない	n
person 2	what do you do for a living ?	何のために生活してるの ？	n
person 1	i am a writer . i do not currently work for a publishing firm	私は作家で今は出版社で働いていない	y
person 2	so you are freelancing now ?	だから今は自由になったのか ？	n
person 1	i just try to live simply until someone likes something i write	本を書くまで生きたいんだ	n
person 2	kinda same as me . chill out , eat vegan and shred on guitar .	俺と同じだよリラックスしてギターを食べて	n
person 1	i could not do the whole vegan thing	私には出来ないわ	n
person 2	its tough but if i touched a burger again my girlfriend would kill me	もしまたバーガーに触ったら彼女が僕を殺す	n
person 1	a vegan that would kill somebody . i do not believe that	誰かを殺すなんて信じられない	n
person 2	when it comes to killing with vegans it is people before animals	動物が動物と戦う前にグンガンを殺すのは	n
