# Supplementary material
Source: ML conference proceedings conference paper supplement (https://aclanthology.org/2022.eval4nlp-1.9)
Supplement: SupplementaryMaterial [file 1041.xlsx]

## Sheet: Sheet1
person	source	translation	evaluation: is this a good translation?
person 1	good morning , how are you today ?	おはよう今日はどう ？	y
person 2	great how are you doing this morning ?	今朝は元気だった ？	n
person 1	excellent . i just came in from weeding the garden .	庭から泣いて来たんだ	n
person 2	cool are you interested in basketball ?	バスケに興味あるか ？	n
person 1	i played a bit in college . i take it that you are a fan ?	大学で少し遊んだけどファンなの ？	y
person 2	never played myself but yes a big fan . you have a hobby ?	ええでも大ファンなの趣味はある ？	n
person 1	i have my garden and i live to visit my friends in the city . how about you ?	庭に友人を訪ねて街で暮らすんだ君はどうなんだ ？	n
person 2	that is awesome , i also like gardening . but i am into hunting too .	それもいいけど狩りが好きなんだ	n
person 1	i have never been hunting . what do you like to hunt ?	狩はしたことがない狩りは何をしたい ？	y
person 2	i actually hate to shoot things i just like the outdoors .	実際のところドアを撃つのは嫌いなんだ	n
person 1	i love the outdoors ! what do you do for a living ?	ドアが大好きなんだ何のために生きるんだ ？	n
person 2	journalist . do you have a big family ?	ジャーナリストです大きな家族はいますか ？	y
person 1	its just me and my mom , she does social work for schools .	母と私だけです学校で働いています	n
person 2	yeah i never got married so same situation . do you work ?	私も結婚したことないわ仕事してるの ？	y
person 1	i work in a specialty food store . i have been there for 15 years .	私は専門店で働いてた 1 5 年もそこにいたの	n
person 2	awesome ! favorite food you sell there ?	おいしい食べ物を売るの好きなのか ？	n
