# Supplementary material
Source: ML conference proceedings conference paper supplement (https://aclanthology.org/2022.eval4nlp-1.9)
Supplement: SupplementaryMaterial [file 1041.xlsx]

## Sheet: Sheet1
person	source	translation	evaluation: is this a good translation?
person 1	good morning , how are you today ?	おはよう、元気？	y
person 2	great how are you doing this morning ?	元気だよ、君は元気？	n
person 1	excellent . i just came in from weeding the garden .	とても元気よ。庭の草取りからちょうど戻ったところ。	y
person 2	cool are you interested in basketball ?	えらいね。バスケに興味ある？	y
person 1	i played a bit in college . i take it that you are a fan ?	大学のころ、少しやってたの。あなたはバスケファンのようね？	y
person 2	never played myself but yes a big fan . you have a hobby ?	一度もやったことはないんだけど、そうだね、大好きだ。趣味はある？	y
person 1	i have my garden and i live to visit my friends in the city . how about you ?	庭いじりと街に住んでる友達を訪ねること。あなたは？	y
person 2	that is awesome , i also like gardening . but i am into hunting too .	それは素敵だね、僕もガーデニングが好きだよ。でも狩りも好きだ。	y
person 1	i have never been hunting . what do you like to hunt ?	狩りはしたことないわ。何を狩るのが好きなの？	y
person 2	i actually hate to shoot things i just like the outdoors .	実は獲物を撃つのは嫌いでね。ただアウトドアが好きなんだ。	y
person 1	i love the outdoors ! what do you do for a living ?	私、アウトドア大好き！お仕事は何を？	y
person 2	journalist . do you have a big family ?	ジャーナリスト。家族は多いの？	y
person 1	its just me and my mom , she does social work for schools .	母と私だけ。母は学校のソーシャルワーカーをしているの。	y
person 2	yeah i never got married so same situation . do you work ?	そうなんだ、僕も結婚したことないから同じだね。仕事はしてるの？	y
person 1	i work in a specialty food store . i have been there for 15 years .	高級食品専門店で働いている。もう１５年になる。	y
person 2	awesome ! favorite food you sell there ?	すごい！そこで好きな食べ物を売ってるの？	n
