# Supplementary material
Source: ML conference proceedings conference paper supplement (https://aclanthology.org/2022.eval4nlp-1.9)
Supplement: SupplementaryMaterial [file 1044.xlsx]

## Sheet: Sheet1
person	source	translation	evaluation: is this a good translation?
person 1	hey how are you today ?	やあ、元気？	y
person 2	i am good thank you for asking , and you ?	元気だよ、気にかけてくれてありがとう、君はどう？	y
person 1	i am good about to go to work at this weird party store i work out haha	元気だよ、例の変なパーティ用品店に仕事に行くところさ、ははは。	y
person 2	that sounds fun ! i might watch a scary movie . i love them .	面白そうだね！僕は怖い映画を観るかも。大好きなんだ。	y
person 1	oo haha scary movies are too much for me which is probably why i love christmas	へえ、はは、怖い映画は僕は無理だな、だからクリスマスが大好きなのかも。	y
person 2	i love spooky things . i would own a black cat if i was not allergic .	僕は不気味なものが大好きでね。アレルギーがなければ黒猫を飼うところだ。	y
person 1	that is unfortunate cats are the best . i have a bunch of rescues because i feel i relate	それは残念だ、猫は最高だよ。保護した猫がたくさんいる、気持ちが分かる気がするんだ。	n
person 2	yes , i wish i could own one ! do you have any hobbies ?	そうだよね、飼えたらいいなあ！何か趣味はある？	y
person 1	no i am just going with the flow i am actually going through a huge scandal right now	ううん、ただ流れに身を任せて生きてるだけ。実は今、大きな騒ぎに巻き込まれてて。	y
person 2	o wow ! i hope everything turns out ok . i enjoy playing the piano .	わあ、大変！すべてうまくいくといいね。僕はピアノを弾くのが好きなんだ。	y
person 1	yeah thanks i have a secret family who i do not even know because i am adopted	うん、ありがとう。僕は養子で、会ったことない秘密の家族がいてね。	y
person 2	wow that must be a lot to deal with .	へえ、それはきっと大変なことがたくさんあるね。	y
