# Supplementary material
Source: ML conference proceedings conference paper supplement (https://aclanthology.org/2022.eval4nlp-1.9)
Supplement: SupplementaryMaterial [file 1044.xlsx]

## Sheet: Sheet1
person	source	translation	evaluation: is this a good translation?
person 1	hey how are you today ?	***	n
person 2	i am good thank you for asking , and you ?	お願いできて嬉しいわあなたとあなたは ？	n
person 1	i am good about to go to work at this weird party store i work out haha	この変な店で仕事をするのが得意なの	n
person 2	that sounds fun ! i might watch a scary movie . i love them .	怖い映画を見るかもしれない	n
person 1	oo haha scary movies are too much for me which is probably why i love christmas	怖い映画は大好きなのはクリスマスだからだ	n
person 2	i love spooky things . i would own a black cat if i was not allergic .	怖いものが好きなんだもしアレルギーじゃなかったら黒猫になるよ	n
person 1	that is unfortunate cats are the best . i have a bunch of rescues because i feel i relate	残念なことに猫は最高の助けがいるんだ遅れてしまって	n
person 2	yes , i wish i could own one ! do you have any hobbies ?	はい一人になりたいんですが何かありますか ？	n
person 1	no i am just going with the flow i am actually going through a huge scandal right now	いや今は大規模な大事件を解決しているところだ	n
person 2	o wow ! i hope everything turns out ok . i enjoy playing the piano .	うまくいくといいけどピアノを楽しんでいるわ	n
person 1	yeah thanks i have a secret family who i do not even know because i am adopted	私が養子だから秘密の家族がいるの	n
person 2	wow that must be a lot to deal with .	大変なことになるわね	y
