# Supplementary material
Source: ML conference proceedings conference paper supplement (https://aclanthology.org/2022.eval4nlp-1.9)
Supplement: SupplementaryMaterial [file 1049.xlsx]

## Sheet: Sheet1
person	source	translation	evaluation: is this a good translation?
person 1	hi , i grew up in toronto canada . you ?	こんにちは、私はカナダのトロントで育ちました。あなたは？	y
person 2	hey i am italian but moved to america when i was a teenager .	こんにちは、私はイタリア人だけど、十代の頃にアメリカに移住したの。	y
person 1	i am japanese but my parents immigrated to canada when i was born .	私は日本人だけど、生まれたときに両親がカナダへ移住してね。	y
person 2	oh cool do you speak japanese then ?	へえ、素敵、じゃあ、日本語が話せるの？	y
person 1	my parents always spoke it at home so yes and english and french .	両親は家ではいつも日本語で話してたから、そうね、話せる、それに英語とフランス語もね。	y
person 2	oh woah triple threat i can only speak italian and english haha .	わぁ、三か国語話せるんだ、私はイタリア語と英語しか話せない、はは。	y
person 1	do you like italian food ? i love mcdonald french fries .	イタリア料理は好き？私はマクドナルドのフライドポテトが大好き。	y
person 2	yeah ! cooking is a passion of mine , i do it all the time for my family	もちろん！料理は大好き、いつも家族のために作ってる。	y
person 1	that is awesome . i cannot cook but i can shop with the best of them .	すごいね。私、料理ができないの、でも買い物ならまかせて。	y
person 2	haha yeah shopping is also a commendable skill .	はは、そうね、買い物も立派なスキルよ。	y
person 1	could you teach me how to cook something italian ?	イタリア料理を何か教えてもらえるかな？	y
person 2	haha probably but i am usually busy with my family i married early and have several kids	はは、いいわよ、でもいつもは家族の世話で忙しくてね、早く結婚して子供が何人かいるの。	y
