# Supplementary material
Source: ML conference proceedings conference paper supplement (https://aclanthology.org/2022.eval4nlp-1.9)
Supplement: SupplementaryMaterial [file 1049.xlsx]

## Sheet: Sheet1
person	source	translation	evaluation: is this a good translation?
person 1	hi , i grew up in toronto canada . you ?	こんにちは、私はオークダで育ったあなたは ？	n
person 2	hey i am italian but moved to america when i was a teenager .	ヘイ、私はアメリカ人だけど、子供の時アメリカに引っ越してきたの	n
person 1	i am japanese but my parents immigrated to canada when i was born .	両親が生まれた時に移民になったんだ	n
person 2	oh cool do you speak japanese then ?	カンザニア語は話せるか ？	n
person 1	my parents always spoke it at home so yes and english and french .	両親はいつも家で話してたんだから英語とフランス語とフランス語とレンチ	n
person 2	oh woah triple threat i can only speak italian and english haha .	三倍の危険な脅威だ英語と英語しか話せない	n
person 1	do you like italian food ? i love mcdonald french fries .	アボカド料理は好きか ？	n
person 2	yeah ! cooking is a passion of mine , i do it all the time for my family	料理は僕の家族のために作ってるんだ	n
person 1	that is awesome . i cannot cook but i can shop with the best of them .	最高の料理はできないけど一番の店は作れない	n
person 2	haha yeah shopping is also a commendable skill .	お買い物も最高の技術だ	n
person 1	could you teach me how to cook something italian ?	何か作る方法を教えてくれないか ？	n
person 2	haha probably but i am usually busy with my family i married early and have several kids	そうかもしれないが私は家族と結婚して子供がいるんだ	n
