# Supplementary material
Source: ML conference proceedings conference paper supplement (https://aclanthology.org/2022.eval4nlp-1.9)
Supplement: SupplementaryMaterial [file 1051.xlsx]

## Sheet: Sheet1
person	source	translation	evaluation: is this a good translation?
person 1	hi , how are you doing ?	元気か ？	n
person 2	i am good . how are you ?	元気だよ元気か ？	y
person 1	i am good too . so what do you like to do in your spare time ?	私もよ時間がないから何をしたいの ？	n
person 2	i like swimming . i can actually jump straight up out of the water	泳ぐのが好きなんだ水から飛び降りるんだ	n
person 1	wow ! are you on a swim team ?	泳ぐチームに乗ってるのか ？	n
person 2	no , but i am tall . both my parents are over 6 feet .	背が高いけど両親は ６ フィート先にいる	n
person 1	lucky ! if i were that tall i would have tried out for basketball .	もっと背が高くなったらバスケのためにバスケをしようと思ってたのに	n
person 2	haha . who do you like to do ?	おっと誰にしますか ？	n
person 1	i watch alot of basket ball and sing barbershop rap .	バスケットボールと床屋を見てるんだ	n
person 2	fun ! i really like fish . it is really all i eat	魚が好きなんだ本当に食べたいんだ	n
person 1	have you ever gone fishing ?	釣りは行ったことあるか ？	y
person 2	when i was younger i did	私が若かった頃	n
person 1	any reason you do not do it anymore ?	もうやってない理由は ？	y
person 2	not really , just went with my dad then .	パパと一緒に行ったんだ	n
