# Supplementary material
Source: ML conference proceedings conference paper supplement (https://aclanthology.org/2022.eval4nlp-1.9)
Supplement: SupplementaryMaterial [file 1051.xlsx]

## Sheet: Sheet1
person	source	translation	evaluation: is this a good translation?
person 1	hi , how are you doing ?	やあ、元気？	y
person 2	i am good . how are you ?	元気だよ。君は？	y
person 1	i am good too . so what do you like to do in your spare time ?	元気だよ。で、時間があるときは何をしてるの？	y
person 2	i like swimming . i can actually jump straight up out of the water	水泳だね。実はね、水中からまっすぐ飛び出すことができるんだ。	y
person 1	wow ! are you on a swim team ?	へぇ！競泳チームのメンバーなの？	y
person 2	no , but i am tall . both my parents are over 6 feet .	ううん、でも背が高いんだ。親が二人とも6フィート以上ある。	y
person 1	lucky ! if i were that tall i would have tried out for basketball .	恵まれてるね！それだけ身長があったら、僕ならバスケの入団テストを受けただろうね。	y
person 2	haha . who do you like to do ?	はは。君の趣味は何？	n
person 1	i watch alot of basket ball and sing barbershop rap .	しょっちゅうバスケを観たり、バーバーショップのラップを歌ったり。	y
person 2	fun ! i really like fish . it is really all i eat	楽しいね！僕は魚が大好きでね。マジで魚ばかり食べてる。	y
person 1	have you ever gone fishing ?	釣りに行ったことある？	y
person 2	when i was younger i did	小さい頃はね。	y
person 1	any reason you do not do it anymore ?	行かなくなったのには何か理由でも？	y
person 2	not really , just went with my dad then .	特にないよ、昔は親父と行ってたってだけさ。	y
