# Supplementary material
Source: ML conference proceedings conference paper supplement (https://aclanthology.org/2022.eval4nlp-1.9)
Supplement: SupplementaryMaterial [file 1052.xlsx]

## Sheet: Sheet1
person	source	translation	evaluation: is this a good translation?
person 1	i need another drink , pronto .	もう一杯飲ませてくれ	n
person 2	haha , my wife made me stop drinking . she is a nurse .	妻が酒を飲ませてくれた看護師だ	n
person 1	ever since they kicked me out of the white house , i cannot stop drinking .	ホワイトハウスから追い出されて以来酒はやめられない	y
person 2	you got kicked out of the white house ?	ホワイトハウスから追い出されたのか ？	y
person 1	sshhh ! my initials are s . b . i cannot keep a job for very long .	（ 吉森 ） あ... あ...	n
person 2	haha , i may know who you are . my 2 kids are the same way .	（ 吉森 ） おっとお前のことはよく知ってるかもしれんが俺の子供も同じだな	n
person 1	its all my fault . i caused all those problems for djt .	（ 吉森 ） 俺のせいなんだ俺が原因だったんだー	n
person 2	well if you need a hideout . i have a place in the mountains . its great .	隠れ家が必要なら山には良い場所がある	n
person 1	i think too much . and then i get tired of thinking and start drinking .	考えすぎて酒を飲み始めるのも疲れた	n
person 2	you should try baseball . it always gets my mind off things .	野球をしようとするといつも気がおかしくなる	n
person 1	i may take you upon that offer . my family wo not take me in .	その申し出を受けてもいいだろう家族は連れて行かない	n
person 2	well if you want to play against someone let me know .	誰かと話したいなら教えてくれ	n
