# Supplementary material
Source: ML conference proceedings conference paper supplement (https://aclanthology.org/2022.eval4nlp-1.9)
Supplement: SupplementaryMaterial [file 1052.xlsx]

## Sheet: Sheet1
person	source	translation	evaluation: is this a good translation?
person 1	i need another drink , pronto .	もう一杯頼むよ、今すぐ。	y
person 2	haha , my wife made me stop drinking . she is a nurse .	はは、僕はかみさんに酒を止められてるんだ。かみさん、看護師なんでね。	y
person 1	ever since they kicked me out of the white house , i cannot stop drinking .	あいつらにホワイトハウスから追い出されてから、俺は酒を止められない。	y
person 2	you got kicked out of the white house ?	ホワイトハウスを追い出された？	y
person 1	sshhh ! my initials are s . b . i cannot keep a job for very long .	しー！俺のイニシャルはS.B。もう長い間仕事を干されてる。	y
person 2	haha , i may know who you are . my 2 kids are the same way .	はは、 君が誰か分かるかも。うちの二人の息子も同じだ。	y
person 1	its all my fault . i caused all those problems for djt .	全部俺が悪いんだ。DJTにいろいろ迷惑をかけちまった。	y
person 2	well if you need a hideout . i have a place in the mountains . its great .	ええと、隠れる所が必要なら、山に家を持ってるんだけど。とてもいい所だよ。	y
person 1	i think too much . and then i get tired of thinking and start drinking .	俺は考えすぎるんだ。そして考えることに疲れて吞み始める。	y
person 2	you should try baseball . it always gets my mind off things .	野球をやってみたらどうかな。僕はそれでいつも気が紛れる。	y
person 1	i may take you upon that offer . my family wo not take me in .	それもいいかもな。家族は俺を家に入れてくれない。	y
person 2	well if you want to play against someone let me know .	じゃあ、誰かと対戦したくなったら教えて。	y
