# Supplementary material
Source: ML conference proceedings conference paper supplement (https://aclanthology.org/2022.eval4nlp-1.9)
Supplement: SupplementaryMaterial [file 1056.xlsx]

## Sheet: Sheet1
person	source	translation	evaluation: is this a good translation?
person 1	hii , how are you ?	元気か ？	n
person 2	i am good but been better car broke down	いい車だけど車が壊れてた	n
person 1	oh , tell me something about you	♪ O h, tell m e about you ♪	n
person 2	i like to work out almost every day	♪ I like t o work out o f all day ♪	n
person 1	oh nice are you married are not ?	結婚してくれて良かったわ	n
person 2	yes but my real love is rugby	しかし本当の愛はラグビーです	n
person 1	ok what is your favourite food item ?	好きな食べ物は何ですか ？	n
person 2	fish sticks are good i suppose	魚の棒はいいと思うけど	n
person 1	that is cool . what is your hobbies ?	カッコいいわあなたのおっぱいは何 ？	n
person 2	working out and playing rugby and you ?	ラグビーとラグビーをやっているのか ？	n
person 1	my hobbies are playing cricket watching movies .	俺のコショウは映画を見てる	n
person 2	those sound like a lot of fun	楽しそうな音がする	y
person 1	and also i really like travelling	旅行が好きなんだ	n
person 2	i too enjoy traveling that is so cool	旅行がすごく楽しいわ	n
