# Supplementary material
Source: ML conference proceedings conference paper supplement (https://aclanthology.org/2022.eval4nlp-1.9)
Supplement: SupplementaryMaterial [file 1056.xlsx]

## Sheet: Sheet1
person	source	translation	evaluation: is this a good translation?
person 1	hii , how are you ?	やあ、元気？	y
person 2	i am good but been better car broke down	元気だよ、でも車が故障しちゃって最近は駄目だね。	n
person 1	oh , tell me something about you	そうか、君のことを話して。	y
person 2	i like to work out almost every day	ほぼ毎日、好きでトレーニングしてる。	y
person 1	oh nice are you married are not ?	へえ、いいね、結婚はしてるの？	y
person 2	yes but my real love is rugby	してるよ、でも本当に好きなのはラグビーだ。	y
person 1	ok what is your favourite food item ?	そうなんだ、好きな食べ物は何？	y
person 2	fish sticks are good i suppose	フィッシュスティックは美味しいよね。	y
person 1	that is cool . what is your hobbies ?	あれ、美味しいね。趣味は何？	y
person 2	working out and playing rugby and you ?	トレーニングとラグビーをすること、で君は？	y
person 1	my hobbies are playing cricket watching movies .	僕の趣味はクリケットをすることと映画を観ること。	y
person 2	those sound like a lot of fun	どっちもすごく楽しそう。	y
person 1	and also i really like travelling	それと旅行も大好きだ。	y
person 2	i too enjoy traveling that is so cool	僕も旅行は好きだ。最高だよ。	y
