# Supplementary material
Source: ML conference proceedings conference paper supplement (https://aclanthology.org/2022.eval4nlp-1.9)
Supplement: SupplementaryMaterial [file 1057.xlsx]

## Sheet: Sheet1
person	source	translation	evaluation: is this a good translation?
person 1	good morning from new york ! !	（ 徹信 ） おはようございますニューヨークから	n
person 2	good morning from wind blown and flooded florida	明日の朝からフロリダが吹っ飛んできて	n
person 1	oh no ! how are you holding up down there ?	そっちはどうだ ？	n
person 2	we are ok lost a bunch of trees on my property so clean up	私の敷地に木がたくさん残ってるから大丈夫よ	n
person 1	i bet it makes for awesome pictures though .	私はそれを素晴らしい写真にすることができますと思います。	n
person 2	yes everybody shares them with news stations here and becomes florida famous .	ええフロリダは有名になるわ	n
person 1	i love taking photos . so when you say we . . . do you have a family ?	写真を撮ってるから家族はいる ？	n
person 2	there are four of us we were going to drive to north carolina next week .	来週、北に向かう予定だった ４ 人がいるんだ	n
person 1	oh . do you have a place to stay there ?	そこに泊る場所があるの ？	n
person 2	my uncle lives there , i always stay in hotel with a bar to watch ufc fights .	叔父さんはいつもホテルでケンカしてるの	n
person 1	that is good . i am the youngest in my family with two older brothers .	いいわ私は ２ 人の弟と一緒にいるのが一番若いの	n
person 2	i am smack dab in the middle of five kids and have two .	５ 人の子供と ２ 人の間でぶち壊すのよ	n
person 1	its nice to get away though . i am attending nyu right now .	でも逃げてくれてよかった今は徹信に会いに行く	n
person 2	we probably wo not get away too much cleanup and such and mess .	おそらく、私たちはあまりにも掃除や混乱から逃れられないかもしれません。	n
person 1	well i guess good luck and enjoy the rest and relax in nc while you can !	さて、私は、残りの幸せと快適さを楽しんで、そして、あなたがすることができる間に ！	n
person 2	thanks , the songeasy street just came up on my phone .	ありがとう、坊やが電話に出てきたのは簡単だ	n
