# Supplementary material
Source: ML conference proceedings conference paper supplement (https://aclanthology.org/2022.eval4nlp-1.9)
Supplement: SupplementaryMaterial [file 1057.xlsx]

## Sheet: Sheet1
person	source	translation	evaluation: is this a good translation?
person 1	good morning from new york ! !	ニューヨークからおはよう！	y
person 2	good morning from wind blown and flooded florida	強風と洪水のフロリダからおはよう。	y
person 1	oh no ! how are you holding up down there ?	大変じゃないか！そちらは大丈夫？	y
person 2	we are ok lost a bunch of trees on my property so clean up	うちは大丈夫、敷地内の木が何本か倒れたから片付けてる。	y
person 1	i bet it makes for awesome pictures though .	きっとすごい写真になるだろうけど。	n
person 2	yes everybody shares them with news stations here and becomes florida famous .	そうだね、ここではみんなニュース局に写真を提供してフロリダを有名にしてくれてる。	y
person 1	i love taking photos . so when you say we . . . do you have a family ?	僕、写真を撮るのが大好きなんだ。それで”僕たち”ということは・・・君、家族はいるの？	y
person 2	there are four of us we were going to drive to north carolina next week .	４人家族なんだけど、来週車でノースカロライナへ行く予定だったんだ。	y
person 1	oh . do you have a place to stay there ?	そうか、向こうで滞在先はあるの？	y
person 2	my uncle lives there , i always stay in hotel with a bar to watch ufc fights .	あっちにおじが住んでる、僕はUFCの試合を観るんでバーがあるホテルにいつも泊まるんだ。	y
person 1	that is good . i am the youngest in my family with two older brothers .	いいね。僕は家族の中では末っ子で、兄が２人いる。	y
person 2	i am smack dab in the middle of five kids and have two .	僕は５人きょうだいのど真ん中で、兄が２人いる。	y
person 1	its nice to get away though . i am attending nyu right now .	でも、どっかに行くのはいいよね。僕は今ニューヨーク大学に通ってる。	y
person 2	we probably wo not get away too much cleanup and such and mess .	たぶん離れられないな、片付けがありすぎるし、めちゃくちゃだから。	n
person 1	well i guess good luck and enjoy the rest and relax in nc while you can !	そうか、まあ頑張ってね、残りの片付けを楽しんで、できるならノース・カロライナでゆっくりしてね！	n
person 2	thanks , the songeasy street just came up on my phone .	ありがとう、ちょうど僕の携帯でイージーストリートの着信音が鳴り出したよ。	y
