# Supplementary material
Source: ML conference proceedings conference paper supplement (https://aclanthology.org/2022.eval4nlp-1.9)
Supplement: SupplementaryMaterial [file 1061.xlsx]

## Sheet: Sheet1
person	source	translation	evaluation: is this a good translation?
person 1	good evening , how are you ?	こんばんは、元気？	y
person 2	pretty good and yourself ?	まあまあよ、君は？	y
person 1	oh fine , just a quiet evening . should get to bed but watching a fascinating documentary .	ああ、元気よ、とても静かな夜ね。寝た方がいいけど興味深いドキュメンタリーを観てる。	y
person 2	my wife likes documentaries . what is this one about ?	僕の妻もドキュメンタリーが好きでね。これはどんな内容？	y
person 1	the worlds columbian exposition in chicago . intriguing stuff .	シカゴ万国博覧会。すごく面白いわよ。	y
person 2	sounds interesting . makes me think of travel and learning about new cultures . i enjoy both .	面白そうだね。旅行で新しい文化を学ぶことを思い出すね。どちらも大好きだ。	n
person 1	good for you ! i do not travel much , have you been anywhere recently ?	いいわね！私はあまり旅行はしないの、最近どこかへ行った？	y
person 2	i went with some military buddies to visit the philippines . good times .	軍人仲間とフィリピンを訪れたよ。楽しかった。	y
person 1	oh that must have been good ! sadly i do not get around well so travel is hard .	ああ、それは楽しかったでしょうね！残念ながら、私はあまり動き回れないから旅行は難しいのよね。	y
person 2	how come ? is it that you do not have the time to travel ?	どうして？旅行する時間がないってこと？	y
person 1	partly time , but i am also paralyzed from the waist down . makes things tricky !	時間がないのもあるけど、腰から下が麻痺してて。それでいろいろ大変なの！	y
person 2	i understand . my wife has a handicap . happened the second year of our marriage .	わかるよ。僕の妻も障害がある。結婚二年目に起きたんだ。	y
person 1	i am sorry to hear that , is she still able to travel with you ?	それはお気の毒だわ、今でもあなたと旅行に行けるの？	y
person 2	she is . we make it work . have been for 20 years .	行けるよ。二人でうまくやってる。２０年になるよ。	y
person 1	that is wonderful , i hope to find someone myself one day .	素敵だわ、私もいつかそんな人に出会いたいわ。	y
person 2	you will . i am sure . my wife and i met at a sports bar watching football .	出会えるよ。きっとね。僕と妻はスポーツバーでサッカーを観ていたときに出会ったんだ。	y
