# Supplementary material
Source: ML conference proceedings conference paper supplement (https://aclanthology.org/2022.eval4nlp-1.9)
Supplement: SupplementaryMaterial [file 1061.xlsx]

## Sheet: Sheet1
person	source	translation	evaluation: is this a good translation?
person 1	good evening , how are you ?	こんばんは、お元気ですか ？	y
person 2	pretty good and yourself ?	あなたとあなたはいいですか ？	n
person 1	oh fine , just a quiet evening . should get to bed but watching a fascinating documentary .	静かな夜だったけど素敵なドキュメンタリーを見た方がいいわ	n
person 2	my wife likes documentaries . what is this one about ?	妻が本を読むのが好きなのこれは何 ？	y
person 1	the worlds columbian exposition in chicago . intriguing stuff .	宇宙はシカゴでは興味深いものだ	n
person 2	sounds interesting . makes me think of travel and learning about new cultures . i enjoy both .	面白いわ新しい文化について勉強してくれない ？	n
person 1	good for you ! i do not travel much , have you been anywhere recently ?	最近どこに行ってたの ？	n
person 2	i went with some military buddies to visit the philippines . good times .	私は、いくつかの軍隊と一緒に行ったことがありました良い時代。	n
person 1	oh that must have been good ! sadly i do not get around well so travel is hard .	ああ、それは良いことだったかもしれませんが、私はあまり旅をしていませんでした。	n
person 2	how come ? is it that you do not have the time to travel ?	なぜ時間がないんだ ？	n
person 1	partly time , but i am also paralyzed from the waist down . makes things tricky !	時間がないが麻痺しているんだ ！	n
person 2	i understand . my wife has a handicap . happened the second year of our marriage .	わかりました妻には ２ 年目の結婚がありました	n
person 1	i am sorry to hear that , is she still able to travel with you ?	まだ旅行できるのか ？	n
person 2	she is . we make it work . have been for 20 years .	2 0 年も一緒に仕事をしてきた	n
person 1	that is wonderful , i hope to find someone myself one day .	素晴らしい一日を過ごしたいわ	n
person 2	you will . i am sure . my wife and i met at a sports bar watching football .	そうよね妻とフットボールバーで会ったの	n
