# Supplementary material
Source: ML conference proceedings conference paper supplement (https://aclanthology.org/2022.eval4nlp-1.9)
Supplement: SupplementaryMaterial [file 1063.xlsx]

## Sheet: Sheet1
person	source	translation	evaluation: is this a good translation?
person 1	hey there , how was your day ?	やあ、今日はどうだった？	y
person 2	pretty good . just finished a delicious tuna fish salad	まあまあよ。美味しいツナサラダを食べ終わったところ。	y
person 1	that sounds pretty good . i am dave , nice to meet you	それはいいね。僕はデイブ、こんにちは。	y
person 2	nina with the green eyes ;	緑の目のニーナよ；	y
person 1	ohhhh . i love green eyes . so beautiful	おおっ。僕、緑の目が大好き。とてもきれいだ。	y
person 2	thank you . by the way , do you like rock and roll ?	ありがとう。ところで、ロックンロールは好き？	y
person 1	i love rock . i am a fitness guru to . hiking is one of my favorite things to do	ロックは大好き。僕はフィットネス指導者もやってる。ハイキングが僕の楽しみの一つ。	y
person 2	nice the only cardio i get is my nerdy sci fi space games though .	素敵。私がやる唯一の有酸素運動はオタクのSFゲームだけどね。	y
person 1	haha . i am a personal trainer so its literally all i do	はは。僕はパーソナルトレーナーだから、まさにトレーニングばかりやってる。	y
person 2	i envy you . its hard for me to get motivated to work out	うらやましいわ。私、なかなか運動する気になれないのよ。	y
person 1	its very rewarding for me . come see me and i will train you	僕にとってはとてもやりがいがあることなんだ。僕のところに来たらトレーニングしてあげるよ。	y
person 2	i would love to but its kind of hard to escape law school	ぜひお願いしたいけど、ロースクールからなかなか抜け出せないの。	y
person 1	oh yea law school is painful i bet lol	ああ、なるほど、ロースクールはきっと大変だろうね（笑）	y
person 2	yes and the first year is horrible . i used to love to read but no more !	ええ、最初の一年は大変。読書は好きだったけど、もう嫌！	y
person 1	where are you from ? i am from las vegas	出身はどこ？僕はラスベガス出身。	y
person 2	i am from los angeles originally	もともとはロサンゼルス出身よ。	y
