# Supplementary material
Source: ML conference proceedings conference paper supplement (https://aclanthology.org/2022.eval4nlp-1.9)
Supplement: SupplementaryMaterial [file 1063.xlsx]

## Sheet: Sheet1
person	source	translation	evaluation: is this a good translation?
person 1	hey there , how was your day ?	ねえ今日はどうだった ？	y
person 2	pretty good . just finished a delicious tuna fish salad	（ 哲希 ） よかったいい感じだないい感じだ	n
person 1	that sounds pretty good . i am dave , nice to meet you	（ 哲希 ） それはよかったよろしくお願いします	n
person 2	nina with the green eyes ;	緑の目と一緒に	n
person 1	ohhhh . i love green eyes . so beautiful	ああ緑色の目が大好きだとてもきれいだ	y
person 2	thank you . by the way , do you like rock and roll ?	ありがとう岩と岩の上が好きなの ？	n
person 1	i love rock . i am a fitness guru to . hiking is one of my favorite things to do	岩が大好きなの私は大好きなの王は私の好きなものなの	n
person 2	nice the only cardio i get is my nerdy sci fi space games though .	素敵なテレポーションだけが私の宇宙ゲームなの	n
person 1	haha . i am a personal trainer so its literally all i do	私は個人的な調教師だからね	n
person 2	i envy you . its hard for me to get motivated to work out	あなたを羨ましいわ仕事から出れるのは大変なの	n
person 1	its very rewarding for me . come see me and i will train you	私に感謝していますあなたに会いに来てください	n
person 2	i would love to but its kind of hard to escape law school	学校を出たいけど法律学校は大変なんです	n
person 1	oh yea law school is painful i bet lol	（ 吉森 ） ああ法律学校はつらいだろうがー	n
person 2	yes and the first year is horrible . i used to love to read but no more !	（ 安藤 ） 最初の年は最悪だが読んでみたかったんだー	n
person 1	where are you from ? i am from las vegas	あなたはどこから来たの ？	n
person 2	i am from los angeles originally	最初からロスから来た	y
