# Supplementary material
Source: ML conference proceedings conference paper supplement (https://aclanthology.org/2022.eval4nlp-1.9)
Supplement: SupplementaryMaterial [file 1071.xlsx]

## Sheet: Sheet1
person	source	translation	evaluation: is this a good translation?
person 1	hi , how are you today ?	こんにちは、今日はどうですか ？	y
person 2	a little tired due to my iron deficiency and unrequited love with adam levine	鉄の治療に疲れた気分が悪くて	n
person 1	anima sucks . hope you feel better soon . i personally like rage metal .	すぐに後悔する金属野郎のように感じた	n
person 2	is that a vegetable ? i like eating kale	野菜テーブルかな ？	n
person 1	ll , no , music . ever tried kale chips ?	音楽も音楽もなしチップも試したことは ？	n
person 2	no , but my two cats love them !	いや猫は ２ 人を愛している ！	n
person 1	ll . my special ed kids love it when i bring kale chips to school .	私の特別な子供たちが学校にチップを持ってきた時は大好きだったわ	n
person 2	oh , my two kids do not like anything . they hate everything .	２ 人の子供は何も好きじゃないわ	n
person 1	kids . i am sure if my students knew it was a veggie they would throw it .	生徒たちが知ってたら投げてくれると思うわ	n
person 2	do you think adam levine likes kale ?	カフカが好きだと思う ？	n
person 1	he might be crunchy . i just listened to a song since i would never heard of him .	彼はイライラするかもしれない私は彼の声を聞いたことがないから	n
person 2	i bet he eat a lot of iron in his diet .	彼はダイエット中アイアンをたくさん食べてると思うわ	n
person 1	he sounds like a vegetarian to me . you get better iron from meat .	ベジタリアンみたいね鉄肉から鉄の肉を取った方がいいわ	n
person 2	do you think if i became a vegetarian he would fall in love with me ?	ベジタリアンになったら私を愛してくれると思う ？	y
