# Supplementary material
Source: ML conference proceedings conference paper supplement (https://aclanthology.org/2022.eval4nlp-1.9)
Supplement: SupplementaryMaterial [file 1071.xlsx]

## Sheet: Sheet1
person	source	translation	evaluation: is this a good translation?
person 1	hi , how are you today ?	こんにちは、今日は調子どう？	y
person 2	a little tired due to my iron deficiency and unrequited love with adam levine	鉄不足とアダム・レヴィーンに片思いでちょっと疲れてる。	y
person 1	anima sucks . hope you feel better soon . i personally like rage metal .	大変。すぐ良くなるといいわね。個人的にはレイジっていうヘビメタが好き。	y
person 2	is that a vegetable ? i like eating kale	それは野菜？私はケールを食べるのが好き。	y
person 1	ll , no , music . ever tried kale chips ?	(爆）ううん、音楽。ケールチップスは食べたことある？	y
person 2	no , but my two cats love them !	ううん、でもうちの二匹の猫はそれ大好きよ！	y
person 1	ll . my special ed kids love it when i bring kale chips to school .	（爆）私が受け持ってる特殊学級の子供たちも学校へケールチップスを持っていくと喜ぶの。	y
person 2	oh , my two kids do not like anything . they hate everything .	あら、うちの子たちは二人とも好きなものがなくてね。あの子たち、何でも嫌いなの。	y
person 1	kids . i am sure if my students knew it was a veggie they would throw it .	子供ってそうよね。私の生徒たちも野菜だってわかったらきっと捨てるわ。	y
person 2	do you think adam levine likes kale ?	アダム・レヴィーンってケールが好きだと思う？	y
person 1	he might be crunchy . i just listened to a song since i would never heard of him .	あの人、健康志向かもね。彼の歌は聞いたことがないから、ちょうど聞いてたところ。	y
person 2	i bet he eat a lot of iron in his diet .	きっと食事で鉄分をたくさん取ってると思う。	y
person 1	he sounds like a vegetarian to me . you get better iron from meat .	彼ってベジタリアンみたいね。鉄分はお肉からの方が取れるわよ。	y
person 2	do you think if i became a vegetarian he would fall in love with me ?	私がベジタリアンになったら、彼、私のこと好きになると思う？	y
