# Supplementary material
Source: ML conference proceedings conference paper supplement (https://aclanthology.org/2022.eval4nlp-1.9)
Supplement: SupplementaryMaterial [file 1074.xlsx]

## Sheet: Sheet1
person	source	translation	evaluation: is this a good translation?
person 1	hello ! do you live near a beach ?	やあ！君は海の近くに住んでるの？	y
person 2	hello , how are you ? and no i do not	やあ、元気？いや、違うよ。	y
person 1	danit . . . i am doing well . i really want a home near the beach .	近くないのか・・・。元気だよ。僕、本気で海の近くに家がほしいんだ。	y
person 2	the way those hurricanes been hitting i would not want a home near there	ハリケーンが襲った様子を見ると、僕なら海の近くに住みたくないな。	y
person 1	california is pretty safe .	カリフォルニアはかなり安全だよ。	y
person 2	cool . that is one of my places to visit one day	いいね。あそこはいつか行ってみたい場所の一つだ。	y
person 1	my parents are school teachers there . i am looking to move back .	両親がそこの学校で教師をやってる。僕は戻る予定だ。	y
person 2	cool that is great ! do you have pets ?	いいね、すごい！ペットはいる？	y
person 1	no pets . i spend a lot of time watching nascar races though .	ペットはいない。僕、かなりの時間ナスカーレースを観てる。	y
person 2	i do not have any pets either	僕もペットはいない。	y
person 1	have you ever watched a nascar race ?	ナスカーレースは観たことある？	y
person 2	yes i have on tv once	うん、テレビで一度観たことある。	y
person 1	nothing better than watching a race on sunday .	日曜日にレースを観るのって最高だよね。	y
person 2	yeah its pretty cool to watch	うん、最高だよ。	y
person 1	what kind of music do you like to listen to ?	どんな音楽が好き？	y
person 2	jazz , rap , r b and reggae	ジャズにラップ、R&B、それにレゲエ。	y
