# Supplementary material
Source: ML conference proceedings conference paper supplement (https://aclanthology.org/2022.eval4nlp-1.9)
Supplement: SupplementaryMaterial [file 1074.xlsx]

## Sheet: Sheet1
person	source	translation	evaluation: is this a good translation?
person 1	hello ! do you live near a beach ?	やぁビーチの近くに住んでるのか ？	y
person 2	hello , how are you ? and no i do not	やあ元気かい ？	n
person 1	danit . . . i am doing well . i really want a home near the beach .	踊り順調よビーチの近くに家が欲しいの	n
person 2	the way those hurricanes been hitting i would not want a home near there	そこの家の近くに家には帰りたくない	n
person 1	california is pretty safe .	カリフォルニアはとても安全だ	n
person 2	cool . that is one of my places to visit one day	いいわね、それが私の場所よいつか私の場所よ	n
person 1	my parents are school teachers there . i am looking to move back .	両親は学校の教師なんだ私は戻ろうとしてるんだ	y
person 2	cool that is great ! do you have pets ?	いいぞペットはいるか ？	n
person 1	no pets . i spend a lot of time watching nascar races though .	ペットじゃない長い間観てきたんだ	n
person 2	i do not have any pets either	ペットも飼ってない	n
person 1	have you ever watched a nascar race ?	車を見たことがあるか ？	n
person 2	yes i have on tv once	一度テレビで見たことがあります	y
person 1	nothing better than watching a race on sunday .	日暮れでレースを見ているよりもいいものはありません	n
person 2	yeah its pretty cool to watch	ああいい眺めだ	n
person 1	what kind of music do you like to listen to ?	どんな音楽が好きなんだ ？	y
person 2	jazz , rap , r b and reggae	ジャズ、ラップ、ラップ、ラップ、レジー	n
