# Supplementary material
Source: ML conference proceedings conference paper supplement (https://aclanthology.org/2022.eval4nlp-1.9)
Supplement: SupplementaryMaterial [file 1075.xlsx]

## Sheet: Sheet1
person	source	translation	evaluation: is this a good translation?
person 1	hello , how are you today ?	やあ、今日は調子どう？	y
person 2	i am doing well , how are you ? are you a surfer too ?	いい感じだよ、君はどう？君もサーファーなの？	y
person 1	no , but i do paddle board . where do you surf ?	ううん、でもパドルボードをやってる。どこでサーフィンしてるの？	y
person 2	in florida , i live right on the water .	フロリダ、ほぼ水の上で生活してる。	y
person 1	i love the water , especially lakes . i stay in lakeside cabins whenever i can .	僕、水のあるところが大好きなんだ、特に湖。行けるときはいつも湖畔の小屋にいる。	y
person 2	those are wonderful too , i love my beach . i read out there all the time .	湖もいいよね、僕はいつも行く海岸が大好きだ。そこでずっと読書してる。	y
person 1	reading lets you travel without moving , and i want to see as many places as i can .	移動しなくても読書で旅行した気分になれるよね、僕はできるだけいろんな場所を見たいな。	y
person 2	i agree . i am going to open up a juice bar next summer .	同感だね。僕、来年の夏、ジュースバーをオープンするつもりなんだ。	y
person 1	i have travelled all across the us except alaska , and tried a different juice in every state .	アラスカ以外のアメリカ中を旅行したんだけど、州ごとにいろんなジュースを飲んだよ。	y
person 2	that sounds interesting , why not alaska ?	それは興味深いな、でもなんでアラスカへ行かなかったの？	y
person 1	it is too cold , so the juice freezes . what kinds of juice will you serve ?	寒すぎるから、ジュースが凍るんだ。どんなジュースを出すつもり？	y
person 2	i am experimenting with apple blends right now .	ちょうど今、リンゴのブレンドジュースを試してるところ。	y
person 1	while in china , i saw that they had a lot of apples . maybe you could import .	中国にいたとき、リンゴをたくさん見たよ。もしかすると輸入できるかも。	y
person 2	we have apples here in america , i do not want to import fruit .	リンゴはここアメリカにもある、僕は果物を輸入したくないんだ。	y
person 1	well , the united states is second in apple production , so that is good too .	そうか、アメリカはリンゴの生産では第二位だから、それもいいね。	y
person 2	there are a lot of orchards near me , eight in a three mile radius .	うちの近くに果樹園がたくさんあって、半径3マイルに８つある。	y
