# Supplementary material
Source: ML conference proceedings conference paper supplement (https://aclanthology.org/2022.eval4nlp-1.9)
Supplement: SupplementaryMaterial [file 1075.xlsx]

## Sheet: Sheet1
person	source	translation	evaluation: is this a good translation?
person 1	hello , how are you today ?	こんにちは今日はどうですか ？	y
person 2	i am doing well , how are you ? are you a surfer too ?	調子はどうですか ？ あなたも運転手 ？	n
person 1	no , but i do paddle board . where do you surf ?	そうじゃなくてトイレはどこ ？	n
person 2	in florida , i live right on the water .	フロリダでは、私は水の中に住んでいます。	n
person 1	i love the water , especially lakes . i stay in lakeside cabins whenever i can .	特に水は好きです特に、特に、私はいつでもそばに滞在することができます。	n
person 2	those are wonderful too , i love my beach . i read out there all the time .	それも素敵だわ海も読んでるし	n
person 1	reading lets you travel without moving , and i want to see as many places as i can .	移動なしで旅をして行ける限り多くの場所を見てみたい	n
person 2	i agree . i am going to open up a juice bar next summer .	同意する来年の夏にはジュースバーを開ける	y
person 1	i have travelled all across the us except alaska , and tried a different juice in every state .	アラスカを横断して他の州でジュースを試してみた	n
person 2	that sounds interesting , why not alaska ?	面白い話だなぜアラスカではない ？	y
person 1	it is too cold , so the juice freezes . what kinds of juice will you serve ?	冷凍庫も冷えるジュースの味は何だ ？	n
person 2	i am experimenting with apple blends right now .	今はリンゴのリンゴを溶かすんだ	n
person 1	while in china , i saw that they had a lot of apples . maybe you could import .	多くの林檎があったのを見たんだ君なら出来るかもしれない	n
person 2	we have apples here in america , i do not want to import fruit .	私たちはアメリカでリンゴを持っています、私は果実を処理したくありません。	n
person 1	well , the united states is second in apple production , so that is good too .	さて、この州は、 2 つの林檎の上にありますので、それはあまりにも良いです。	n
person 2	there are a lot of orchards near me , eight in a three mile radius .	私の近くには、 1 マイル以内にたくさんの墓があります。 3 マイル以内に、 8 マイル以内に。	n
