# Supplementary material
Source: ML conference proceedings conference paper supplement (https://aclanthology.org/2022.eval4nlp-1.9)
Supplement: SupplementaryMaterial [file 1081.xlsx]

## Sheet: Sheet1
person	source	translation	evaluation: is this a good translation?
person 1	good evening . i am ready to chat .	今晩はお邪魔します	n
person 2	how are you doing ? good i hope	調子はどうだ ？	n
person 1	i am . just go home from my job . i am grocery store manager .	私は仕事から帰って私は雑貨屋です	n
person 2	cool . i love grocery shopping . what do you do for fun ?	いいわ買い物が好きなの何を楽しんでるの ？	n
person 1	i dabble in being a tour guide and i like to help with bookkeeping .	私はツアーガイドになって私は編集長と一緒にいたいの	n
person 2	i just graduated college	卒業したばかりなのに	n
person 1	what did you major in ? that is exciting .	何してたんだすごいな	n
person 2	music . i love all kinds of music .	音楽、音楽、音楽、沢山大好き	n
person 1	cool ! ! what do you like to eat ? no animal products for me .	動物料理はどうだ ？	n
person 2	i am a vegetarian strictly .	俺はベジタリアンだ	n
person 1	i have been a vegan for only a year . how long vegetarian for you ?	俺は １ 年もベジタリアンだったいつからベジタリアンなんだ ？	n
person 2	since birth . my parents were	生まれてから両親が生まれた時から	n
person 1	so you grew up like that . aspirations for you ?	だから成長したのか ？	n
person 2	i want to do detective work . going to grad school i hope .	仕事をしたいんだ学級学校に行くことを願うよ	n
person 1	interesting . good luck with that ! !	面白いわ頑張って頑張って ！	n
person 2	thanks ! do you like dogs	ありがとう犬が好きなのね	n
