# Supplementary material
Source: ML conference proceedings conference paper supplement (https://aclanthology.org/2022.eval4nlp-1.9)
Supplement: SupplementaryMaterial [file 1081.xlsx]

## Sheet: Sheet1
person	source	translation	evaluation: is this a good translation?
person 1	good evening . i am ready to chat .	こんばんは。いつでもチャットできるわよ。	y
person 2	how are you doing ? good i hope	調子はどう？元気だといいんだけど。	y
person 1	i am . just go home from my job . i am grocery store manager .	元気よ。ちょうど仕事から帰ってきたところ。私、食料品店の店長なの。	y
person 2	cool . i love grocery shopping . what do you do for fun ?	素敵。食料品の買い物、大好きよ。暇なときは何してる？	y
person 1	i dabble in being a tour guide and i like to help with bookkeeping .	ツアーガイドもやってるし、経理の手伝いも好き。	y
person 2	i just graduated college	私は大学を卒業したばかり。	y
person 1	what did you major in ? that is exciting .	専攻は何だった？楽しみね。	y
person 2	music . i love all kinds of music .	音楽。いろんな音楽が大好き。	y
person 1	cool ! ! what do you like to eat ? no animal products for me .	素敵！！食べ物は何が好き？私は動物性食品はだめ。	y
person 2	i am a vegetarian strictly .	私は厳格な菜食主義なの。	y
person 1	i have been a vegan for only a year . how long vegetarian for you ?	私は一年だけヴィーガンだった。あなたはどれくらい菜食主義を続けてるの？	y
person 2	since birth . my parents were	生まれたときから。両親がそうだったの。	y
person 1	so you grew up like that . aspirations for you ?	じゃあ、そういうふうに育ったのね。あなたの夢は？	y
person 2	i want to do detective work . going to grad school i hope .	探偵業に就きたいと思ってる。できれば大学院に進むわ。	y
person 1	interesting . good luck with that ! !	なるほど。うまくいくといいね！！	y
person 2	thanks ! do you like dogs	ありがとう！あなたは犬が好き？	y
