# Supplementary material
Source: ML conference proceedings conference paper supplement (https://aclanthology.org/2022.eval4nlp-1.9)
Supplement: SupplementaryMaterial [file 1082.xlsx]

## Sheet: Sheet1
person	source	translation	evaluation: is this a good translation?
person 1	hey , hows your day going ?	ねえ、あなたの日が来るの ？	n
person 2	hello . great , i am listening to my favorite band vv nation .	こんにちは、私は私のお気に入りのバンドを聞いています。	n
person 1	have not heard of them , but i am a huge bruno mars fan	聞いたことないけど僕は大ファンなんだ	n
person 2	that is cool . do you have a favorite tv show ?	いいわテレビ番組は好き ？	y
person 1	do not watch much tv sadly , too much work at my accounting job .	テレビはあまり見るな仕事で仕事が多すぎて	n
person 2	oh , my job is at the railroad but i still have time to watch star trek .	俺の仕事は地下鉄だがスターを見る時間が必要だ	n
person 1	do you have any pets ? my dad worked at the railroad and loved dogs	ペットはいますか ？ パパは列車や犬を愛していました	n
person 2	yes , me and my pet like snacking on pretzels when we watch tv shows .	テレビを見てる時ペットとペットの匂いがするんだ	n
person 1	that is awesome , my poor dogs always get sick if i feed them pretzels .	それは素晴らしい犬はいつも空腹になるんだ	n
person 2	yeah , maybe i should stop feeding them to him .	食事を止めないと	n
person 1	are you a fan of cars ?	車のファンなの ？	y
person 2	not too much . i really like trains since i work on the railroad . you ?	そうじゃなくて本当に電車で働くのが好きなの ？	n
person 1	yea , i just bought a red ferrari . was worth every penny .	赤坂を買ったばかりなのに金になる価値があったんだ	n
person 2	wow . that sounds awesome and fast !	すごい音だ速すぎた ！	n
person 1	only downside is the temptation to speed . already got a few tickets .	誘惑に過ぎないチケットもある	n
person 2	that is not good . maybe try cruise control .	それは良くないクルーズをコントロールしようとしてるのかも	n
