# Supplementary material
Source: ML conference proceedings conference paper supplement (https://aclanthology.org/2022.eval4nlp-1.9)
Supplement: SupplementaryMaterial [file 1082.xlsx]

## Sheet: Sheet1
person	source	translation	evaluation: is this a good translation?
person 1	hey , hows your day going ?	やあ、今日はどうだった？	y
person 2	hello . great , i am listening to my favorite band vv nation .	こんにちは。よかったよ、お気に入りのバンド、VNVネイションズを聞いてる。	n
person 1	have not heard of them , but i am a huge bruno mars fan	そのバンドは聞いたことないな、僕はブルーノ・マーズの大ファンだ。	y
person 2	that is cool . do you have a favorite tv show ?	いいね。好きなテレビ番組はある？	y
person 1	do not watch much tv sadly , too much work at my accounting job .	残念ながらあまりテレビは観ないんだ、経理の仕事が多すぎてね。	y
person 2	oh , my job is at the railroad but i still have time to watch star trek .	そうか、僕は鉄道で働いているけど、それでもスタートレックを観る時間はある。	y
person 1	do you have any pets ? my dad worked at the railroad and loved dogs	何かペットを飼ってる？僕の父は鉄道で働いてて犬が大好きだった。	y
person 2	yes , me and my pet like snacking on pretzels when we watch tv shows .	うん、僕とペットは、テレビ番組を観るときはプレッツェルをつまむのが好きなんだ。	y
person 1	that is awesome , my poor dogs always get sick if i feed them pretzels .	それはすごい、僕の犬たちはかわいそうなことにプレッツェルをあげると必ず調子が悪くなるんだ。	y
person 2	yeah , maybe i should stop feeding them to him .	そうだよね、僕もペットにあげるのはやめた方がいいかも。	y
person 1	are you a fan of cars ?	車は好き？	y
person 2	not too much . i really like trains since i work on the railroad . you ?	あまり好きじゃない。鉄道で働いてるから、電車がとても好きなんだ。君は？	y
person 1	yea , i just bought a red ferrari . was worth every penny .	好きだよ、赤いフェラーリを買ったばっかり。高いだけのことはある。	y
person 2	wow . that sounds awesome and fast !	うわー。それはすごいし、速そうだね！	y
person 1	only downside is the temptation to speed . already got a few tickets .	唯一のマイナス面はスピードを出したくなるってことかな。もう何回か違反切符を切られちゃった。	y
person 2	that is not good . maybe try cruise control .	それはよくないね。車速設定装置を試してみてもいいかもね。	y
