# Supplementary material
Source: ML conference proceedings conference paper supplement (https://aclanthology.org/2022.eval4nlp-1.9)
Supplement: SupplementaryMaterial [file 1084.xlsx]

## Sheet: Sheet1
person	source	translation	evaluation: is this a good translation?
person 1	hi there ! what do you do for work ?	こんにちはお仕事は ？	y
person 2	i am still in college , going to be a lawyer one day .	まだ大学にいる弁護士になるの	n
person 1	lots of work . i used to drive a big rig , now i just fix them . much simpler .	仕事がたくさんあって今はもっと簡単に修理した	n
person 2	what is your favorite season ? i love summer .	夏好きなシーズンは ？	n
person 1	fall . halloween is so much fun .	落ちちゃうわとっても楽しいわ	n
person 2	tell me something about yourself .	自分のことを話してくれ	y
person 1	i quit driving my truck when i married my girl . i want to take her to fiji .	俺は女と結婚したとき車を止めたんだフィジーに連れて行きたい	n
person 2	oh , i have a boyfriend i love .	恋人が好きなの	n
person 1	that is sweet . how long have you two been together ?	優しいわねいつから一緒にいたの ？	n
person 2	we have been together almost a year .	私たちは １ 年以上一緒だった	n
person 1	and many more , i hope .	もっと多くのことを願っている	y
person 2	i sure hope so ! how long have you been married ?	そう願ってるわ結婚してどれくらい ？	y
person 1	married two years . i need to learn to calm down more , i am always active .	2 年結婚したのよ落ち着いて勉強しないと	n
person 2	maybe get some butterflies . they help me chill out .	多分蝶か何か買ってきてくれ	n
person 1	there is an idea ! my dad drove trucks too , keeping moving is in my blood .	パパもトラックを運転して私の血の中に移動してるの	n
person 2	oh . my grandfather was a truck driver .	祖父は運転手だった	n
