# Supplementary material
Source: ML conference proceedings conference paper supplement (https://aclanthology.org/2022.eval4nlp-1.9)
Supplement: SupplementaryMaterial [file 1084.xlsx]

## Sheet: Sheet1
person	source	translation	evaluation: is this a good translation?
person 1	hi there ! what do you do for work ?	やあ！仕事は何してるの？	y
person 2	i am still in college , going to be a lawyer one day .	私、まだ大学生なの、いつか弁護士になるつもり。	y
person 1	lots of work . i used to drive a big rig , now i just fix them . much simpler .	勉強することがいっぱいだね、僕は大型トラックを運転してたけど、今ちょうど改良したところ。ずっとシンプルになった。	n
person 2	what is your favorite season ? i love summer .	好きな季節はいつ？私は夏が大好き。	y
person 1	fall . halloween is so much fun .	秋だね。ハロウィンはすごく楽しい。	y
person 2	tell me something about yourself .	あなたのことを教えて。	y
person 1	i quit driving my truck when i married my girl . i want to take her to fiji .	彼女と結婚したときにトラックの乗るのをやめたんだ。彼女をフィジーに連れていきたい。	y
person 2	oh , i have a boyfriend i love .	まあ、私には大好きなボーイフレンドがいる。	y
person 1	that is sweet . how long have you two been together ?	素敵だね。二人は付き合ってどれくらいなの？	y
person 2	we have been together almost a year .	一年くらい。	y
person 1	and many more , i hope .	もっと続くといいね。	y
person 2	i sure hope so ! how long have you been married ?	心からそう願ってる！あなたは結婚してどれくらい？	y
person 1	married two years . i need to learn to calm down more , i am always active .	２年になる。もっと落ち着くようにしないとね、僕はいつも動き回ってるから。	y
person 2	maybe get some butterflies . they help me chill out .	蝶を飼ってみるといいかも。私は蝶がいると落ち着くの。	y
person 1	there is an idea ! my dad drove trucks too , keeping moving is in my blood .	いい考えだね！僕の親父もトラックに乗ってたから、動き続けるのは血筋だね。	y
person 2	oh . my grandfather was a truck driver .	あら、私の祖父はトラックの運転手だったわよ。	y
