# Supplementary material
Source: ML conference proceedings conference paper supplement (https://aclanthology.org/2022.eval4nlp-1.9)
Supplement: SupplementaryMaterial [file 1085.xlsx]

## Sheet: Sheet1
person	source	translation	evaluation: is this a good translation?
person 1	how is your friday going ?	金曜はどうだった ？	n
person 2	it is going good , i work every friday because i work as an international business man .	毎日良い仕事をしてるんだ俺は国際ビジネスマンとして働いてるからな	n
person 1	that must be hard , i work with vets as a tech	それは難しいでしょう私はエンジニアとして働いています	n
person 2	that is great , do you like your job ?	それは素晴らしい、あなたの仕事が好きですか ？	y
person 1	it is a good way to help animals	それは動物を助けるには良い方法です	y
person 2	that is great , i love animals . do you know any languages ?	素晴らしい動物が好きなんだ言葉は分かるか ？	n
person 1	just english , i love to read	英語を読むのが好きなんだ	n
person 2	i love to read too , i know over 300 languages , some say i am a genius .	3 0 0 語でも読むのが好きなんだ俺は天才だって言ってる	n
person 1	that is amazing . do you like movies ?	すごい映画は好きか ？	y
person 2	sometimes i usually really only watch documentaries .	時々、私は実際に実際に見ているものを見ているだけだ。	n
person 1	my favorite are horror movies	私のお気に入りのホラー映画は怖いわ	n
person 2	i own a creepy mansion that reminds me of a horror movie	私は自分自身が怖いホラー映画を思い出しているのを覚えている	n
person 1	stephen king would like that . i love his books	義理の王はその本が好きなんだ	n
person 2	i enjoy stephen king as well , have you seen the newest movie based on his books ?	本に書かれた本を楽しんでいるのか ？	n
