# Supplementary material
Source: ML conference proceedings conference paper supplement (https://aclanthology.org/2022.eval4nlp-1.9)
Supplement: SupplementaryMaterial [file 1085.xlsx]

## Sheet: Sheet1
person	source	translation	evaluation: is this a good translation?
person 1	how is your friday going ?	金曜日はどんな感じ？	y
person 2	it is going good , i work every friday because i work as an international business man .	まあまあだね、金曜日はいつも仕事だ、僕は国際的なビジネスマンだからね。	y
person 1	that must be hard , i work with vets as a tech	きっと大変でしょうね、私は技師として動物病院で働いてる。	y
person 2	that is great , do you like your job ?	いいね、仕事は好き？	y
person 1	it is a good way to help animals	動物を助けるいい方法よ。	y
person 2	that is great , i love animals . do you know any languages ?	素晴らしい、動物は大好きだ。外国語はわかる？	y
person 1	just english , i love to read	英語だけ、本を読むのが好き。	y
person 2	i love to read too , i know over 300 languages , some say i am a genius .	僕も読書が好きだ、僕は300以上の言語を知ってる、僕を天才って呼ぶ人もいるよ。	y
person 1	that is amazing . do you like movies ?	すごいわ。映画は好き？	y
person 2	sometimes i usually really only watch documentaries .	時々観るけど、大抵ドキュメンタリーしか観ないね。	y
person 1	my favorite are horror movies	私はホラー映画が大好き。	y
person 2	i own a creepy mansion that reminds me of a horror movie	ホラー映画を思い出させるような気味悪い屋敷を持ってるよ。	y
person 1	stephen king would like that . i love his books	それはスティーブン・キングが好きそう。私、彼の本が大好きなの。	y
person 2	i enjoy stephen king as well , have you seen the newest movie based on his books ?	僕もスティーブン・キングは大好きだ、彼の本を原作にした最新映画は観たかい？	y
