# Supplementary material
Source: ML conference proceedings conference paper supplement (https://aclanthology.org/2022.eval4nlp-1.9)
Supplement: SupplementaryMaterial [file 1086.xlsx]

## Sheet: Sheet1
person	source	translation	evaluation: is this a good translation?
person 1	hello ! this is weird . . . . . . i am pretty shy .	こんにちは！なんか変な感じだな・・・。僕はとてもシャイなんだ。	y
person 2	hi , i completely understand , i am the same way haha	こんにちは、すごくよくわかる、私も同じだから、はは。	y
person 1	ll ! so what kind of music do you like ?	（爆）！で、どんな音楽が好き？	y
person 2	i love pop , r b , oldies , pretty much everything but country , what about you ?	ポップにR＆B,オールディーズ、カントリー以外はほぼ全部好きよ、あなたは？	y
person 1	i am basically the same . especially oldies . i enjoy the beatles .	基本的に同じだね。特にオールディーズ。ビートルズが大好きだ。	y
person 2	i do not listen to them much , i am more into motown	それはあまり聴かないな、モータウンサウンドの方が好き。	y
person 1	temptations ? i loved them .	ザ・テンプテーションズ？大好きだ。	y
person 2	yesses , they were amazing , i also love the five heartbeats	そうそう、素晴らしかったよね、ファイブ・ハートビーツも大好きよ。	y
person 1	they are good also . ugh my cat keeps getting on my keyboard , lol .	彼らもいいね。うっ、猫がキーボードに乗ってきてしかたない、（笑）。	n
person 2	www , that is adorable , probably saying pay attention to me , human haha	www、かわいいね、たぶん、人間さん、私を見てって言ってるのよ。	y
person 1	she is trying to eat my vegetables . and get attention ! haha .	こいつ、僕の野菜を食べようとしてる。そして気を引こうとしてる！はは。	y
person 2	lol , food is life haha	（笑）、食べ物が人生、はは。	y
person 1	definitely agree omao . i wish i could have peanuts but i am allergic .	ぶっちゃけ、その通り。ピーナッツが食べれるといいんだけど、アレルギーがあるんだ。	y
person 2	www , darn , i think i am allergic to whatever they put on apples . .	www、やだ、私はリンゴについているものには、何であれアレルギーがあるみたい・・・。	y
person 1	well , what the eff ! i love apples lol . i gotta go though !	えー、何それ！僕、リンゴ大好き（笑）もう行かなきゃ！	y
person 2	i know right , well it was nice talking to you	だよね、ええと、話ができてよかった。	y
