# Supplementary material
Source: ML conference proceedings conference paper supplement (https://aclanthology.org/2022.eval4nlp-1.9)
Supplement: SupplementaryMaterial [file 1086.xlsx]

## Sheet: Sheet1
person	source	translation	evaluation: is this a good translation?
person 1	hello ! this is weird . . . . . . i am pretty shy .	どうも変な感じだとても恥ずかしがり屋さんだ	n
person 2	hi , i completely understand , i am the same way haha	私もそう思ってるわ	n
person 1	ll ! so what kind of music do you like ?	（ 哲希 ） なんでどんな音楽が好きなんだよ	n
person 2	i love pop , r b , oldies , pretty much everything but country , what about you ?	好きなんだけどあなたはどうなの ？	n
person 1	i am basically the same . especially oldies . i enjoy the beatles .	私も同じだ特に死んだ魚を楽しんでるんだ	n
person 2	i do not listen to them much , i am more into motown	耳にしないで町にはもっとモグラがいる	n
person 1	temptations ? i loved them .	私は彼らを愛していました。	n
person 2	yesses , they were amazing , i also love the five heartbeats	彼らは素晴らしいでした、私は 5 本の心臓が大好きでした。	n
person 1	they are good also . ugh my cat keeps getting on my keyboard , lol .	それに猫もいいわよ私のキーボードにも注目してくれてるの	n
person 2	www , that is adorable , probably saying pay attention to me , human haha	かわいいわね人間の注意を払ってくれって言われたのよ	n
person 1	she is trying to eat my vegetables . and get attention ! haha .	彼女は私の野菜を食べようとしているそれに気をつけて ！	y
person 2	lol , food is life haha	食べ物は楽しそうだけど	n
person 1	definitely agree omao . i wish i could have peanuts but i am allergic .	確かにペコペコだけどアレルギーなんだ	n
person 2	www , darn , i think i am allergic to whatever they put on apples . .	何でもリンゴにアレルギーなアレルギーなんだ	n
person 1	well , what the eff ! i love apples lol . i gotta go though !	それはどうしたリンゴは大好きだけど行かなきゃ	n
person 2	i know right , well it was nice talking to you	そうか話せて良かった	y
