# Supplementary material
Source: ML conference proceedings conference paper supplement (https://aclanthology.org/2022.eval4nlp-1.9)
Supplement: SupplementaryMaterial [file 1087.xlsx]

## Sheet: Sheet1
person	source	translation	evaluation: is this a good translation?
person 1	hi how are you doing today	今日の調子はどう ？	n
person 2	great ! i just had a big salad after hiking all day . you ?	今日は最高のサラダだったわあなたは ？	n
person 1	good , the weather is very cold but i can not wait to go skiing	良い天気はとても寒くて、しかし、私はコチャンスキーを待つことができません	n
person 2	i prefer the warmer months but love all nature .	私は数ヶ月は暖かいことが好きです自然は好きです	n
person 1	me too , i live in colorado , how about you	私も、私も、私も、コロラドに住んでいます、あなたはどうですか ？	n
person 2	upstate new york . people think the state is nothing but city but it is not .	新しい州では、人々は考えていませんが、州は都市ではないと考えています。	n
person 1	there is very nice trees there right ?	そこに木があるんでしょ ？	n
person 2	there sure are ! bright reds , vibrant yellows and orange .	確かにゴージャスとオレンジとオレンジだ	n
person 1	that sounds great ! , what else do you like to do ?	それは良かった他にどうしますか ？	y
person 2	i spend most of my time outside , especially now that i am divorced . you ?	私はいつも外で過ごしてきた特に離婚したことはあるか ？	n
person 1	i love music , one d is the best	音楽が好きなんだ １ 曲は最高だ	n
person 2	they are alright . i prefer edm .	大丈夫エディが好きなの	n
person 1	who is your favourite artist	好きな芸術家は誰 ？	y
person 2	i mean , out of everyone it would be radiohead .	みんな放射能の頭になるかも	n
person 1	interesting , i am not a big fan of them	面白いけど私は大ファンじゃない	y
person 2	what ! ? i have been obsessed with them forever .	ずっと彼らと取り憑かれてきたの	n
