# Supplementary material
Source: ML conference proceedings conference paper supplement (https://aclanthology.org/2022.eval4nlp-1.9)
Supplement: SupplementaryMaterial [file 1087.xlsx]

## Sheet: Sheet1
person	source	translation	evaluation: is this a good translation?
person 1	hi how are you doing today	こんにちは、今日は調子どう？	y
person 2	great ! i just had a big salad after hiking all day . you ?	とても元気よ！一日中ハイキングした後でちょうど大盛りのサラダを食べたところ。あなたは？	y
person 1	good , the weather is very cold but i can not wait to go skiing	元気よ、お天気はとても寒いけど、スキーがしたくてたまらない。	y
person 2	i prefer the warmer months but love all nature .	私は暖かい時期の方が好きだけど、自然はすべて大好き。	y
person 1	me too , i live in colorado , how about you	私もよ、私はコロラドに住んでる、あなたは？	y
person 2	upstate new york . people think the state is nothing but city but it is not .	ニューヨーク州の北部よ。みんなニューヨーク州というとニューヨーク市だけだと思ってるけどそうじゃない。	n
person 1	there is very nice trees there right ?	木々がとても美しいよね？	y
person 2	there sure are ! bright reds , vibrant yellows and orange .	その通り！鮮やかな赤、明るい黄色にオレンジ。	y
person 1	that sounds great ! , what else do you like to do ?	素晴らしいね！他に何か趣味はある？	y
person 2	i spend most of my time outside , especially now that i am divorced . you ?	ほとんどの時間を外で過ごすわ、離婚したから特にね。あなたは？	y
person 1	i love music , one d is the best	私は音楽が大好き、ワン・ダイレクションは最高。	y
person 2	they are alright . i prefer edm .	彼ら、いいよね。私はEDMの方が好きだけど。	y
person 1	who is your favourite artist	お気に入りのアーティストは誰？	y
person 2	i mean , out of everyone it would be radiohead .	ええと、全員の中からってことなら、レディオヘッドね。	y
person 1	interesting , i am not a big fan of them	そうなんだ、私はあまり好きじゃない。	y
person 2	what ! ? i have been obsessed with them forever .	ええ！？私はずっと夢中よ。	y
