# Supplementary material
Source: ML conference proceedings conference paper supplement (https://aclanthology.org/2022.eval4nlp-1.9)
Supplement: SupplementaryMaterial [file 1089.xlsx]

## Sheet: Sheet1
person	source	translation	evaluation: is this a good translation?
person 1	hello , how are you doing tonight ?	こんにちは、今夜は調子どう？	y
person 2	pretty good , thanks for asking	元気だよ、お気遣いありがとう。	y
person 1	no problem , what are you up to ?	どういたしまして。今何してるの？	y
person 2	trying to find a good book to read tonight . . do you have any suggestions ?	今夜読むのによい本を探してる・・・。何かお薦めはある？	y
person 1	i am into mystery and paranormal , those are usually good books to get into .	僕は推理小説と超常現象にはまってる、大抵こういう本って没頭するのにうってつけだ。	y
person 2	a mystery would be a welcome change .	推理小説はちょうどいい気分転換になるだろうね。	y
person 1	i love mystery and paranormal or true crime	僕はミステリーと超常現象、それか犯罪ドキュメンタリーが大好き。	y
person 2	i usually read books that take place at sea . . with sharks .	僕はいつもは海での出来事を描いた本を読むよ・・・サメが出てくるのとか。	y
person 1	i love watching jaws and other shark movies , i love the ocean too	ジョーズとかサメの映画を観るの好きだな、海も大好きだ。	y
person 2	so what do you do ?	で、仕事は何をしてるの？	y
person 1	i work at a prison . but i love getting outdoors and doing different things .	刑務所で働いてる。でもアウトドアで過ごしたり、いろんなことをするのが好き。	y
person 2	yep nature is pretty awesome . the complexity of everything can humble a person .	うん、自然はとても素晴らしい。あらゆるものが複雑で、人間は謙虚になれる。	y
person 1	yes it definitely can . i love hiking , taking photos , being adventurous . what about you ?	うん、それは間違いない。僕はハイキングしたり、写真を撮ったり、冒険したりするのが好きでね。君は？	y
person 2	i really love dancing , i instruct couples for their weddings .	踊るのが本当に大好き。結婚式のためにカップルに教えてる。	y
