# Supplementary material
Source: ML conference proceedings conference paper supplement (https://aclanthology.org/2022.eval4nlp-1.9)
Supplement: SupplementaryMaterial [file 1089.xlsx]

## Sheet: Sheet1
person	source	translation	evaluation: is this a good translation?
person 1	hello , how are you doing tonight ?	今晩の調子はどう ？	n
person 2	pretty good , thanks for asking	結構ですありがとうございました	n
person 1	no problem , what are you up to ?	いいのよ何をしてるの ？	y
person 2	trying to find a good book to read tonight . . do you have any suggestions ?	今夜本を読んでみたいんだが何か提案は ？	n
person 1	i am into mystery and paranormal , those are usually good books to get into .	謎や精神的な本を見つけるのはいつも良いことだ	n
person 2	a mystery would be a welcome change .	謎が変わるかもしれない	n
person 1	i love mystery and paranormal or true crime	謎や脳犯罪が好きなんだ	n
person 2	i usually read books that take place at sea . . with sharks .	いつも海で本を読んでるサメと一緒にな	n
person 1	i love watching jaws and other shark movies , i love the ocean too	他の映画も見たい	n
person 2	so what do you do ?	それであなたはどうするの ？	y
person 1	i work at a prison . but i love getting outdoors and doing different things .	刑務所で働いているが、別のことをするのが好きなんだ。	n
person 2	yep nature is pretty awesome . the complexity of everything can humble a person .	自然は素晴らしいし、悲惨なこともできる。	n
person 1	yes it definitely can . i love hiking , taking photos , being adventurous . what about you ?	そうだな写真を撮ったり写真を撮るのは楽しい君はどうなんだ ？	n
person 2	i really love dancing , i instruct couples for their weddings .	本当にダンスが大好きなカップルのためのレッスンを受けてるんだ	n
