# Supplementary material
Source: ML conference proceedings conference paper supplement (https://aclanthology.org/2022.eval4nlp-1.9)
Supplement: SupplementaryMaterial [file 1095.xlsx]

## Sheet: Sheet1
person	source	translation	evaluation: is this a good translation?
person 1	what are you plans today ?	今日の予定は？	y
person 2	good question just taking it easy listening to some blues music	いい質問だ、ちょうどくつろいでブルースを聞いてるところ。	y
person 1	great ! i am taking a little break from my studies	最高！僕は勉強をやめて一休みしてる。	y
person 2	cool , what are you studying ?	いいね、何を勉強してるの？	y
person 1	i want to manage a casino one day . business management	いつかカジノを経営したいと思ってる。企業経営。	y
person 2	really , that is sound like lucrative job	そうなんだ、それは儲かりそうな仕事だね。	y
person 1	i am already a dealer for blackjack . i even know how to count cards	僕はすでにブラックジャックのディーラーなんだ。カードカウンティングのやり方だって知ってる。	y
person 2	haha that funny , you really know your stuff	はは、それは面白い、さすが、よく知ってるね。	y
person 1	i got to support my 3 children . what do you do ?	３人の子供を育てないといけないからね。君の仕事は？	y
person 2	i am translator , i speak english and spanish	翻訳家だ、英語とスペイン語が話せる。	y
person 1	that is great . you could do a lot with that	すごい。それでいろんなことができるね。	y
person 2	i lived in germany mixed with puerto rican and chinese	僕はプエルトリコと中国のハーフでドイツに住んでいた。	y
person 1	i am impressed . do you have anything you do for fun ?	素晴らしい。何か趣味はある？	y
person 2	yeah listen to blues music and prince	うん、ブルースとプリンスを聴くこと。	y
person 1	great artists . i get so busy with the casino to do much more than that	素晴らしいアーティストだよね。僕はカジノが忙しくなって他のことがあまりできない。	y
person 2	well but you are doing something you love and making money	うーん、でも君は自分の好きなことをしてお金を稼いでるよね。	y
