# Supplementary material
Source: ML conference proceedings conference paper supplement (https://aclanthology.org/2022.eval4nlp-1.9)
Supplement: SupplementaryMaterial [file 1095.xlsx]

## Sheet: Sheet1
person	source	translation	evaluation: is this a good translation?
person 1	what are you plans today ?	今日は何を計画しているの ？	y
person 2	good question just taking it easy listening to some blues music	いい質問だなブルース音楽を聞かせてくれ	n
person 1	great ! i am taking a little break from my studies	いいぞ勉強から少し休みを取ろう	n
person 2	cool , what are you studying ?	クール、何を勉強しているのですか ？	n
person 1	i want to manage a casino one day . business management	カジノの仕事をしたいんだが	n
person 2	really , that is sound like lucrative job	本当に、それは仕事のようだ	n
person 1	i am already a dealer for blackjack . i even know how to count cards	ブラックジャックのための売人だが、カードの数を数え方も知っている	n
person 2	haha that funny , you really know your stuff	面白いわね本当にあなたのこと知ってるの ？	n
person 1	i got to support my 3 children . what do you do ?	3 人の子供をサポートしなきゃ	n
person 2	i am translator , i speak english and spanish	私は翻訳通訳して英語も話せるし、英語も話せるし、	n
person 1	that is great . you could do a lot with that	それはよかった、もっとできるかもしれない	y
person 2	i lived in germany mixed with puerto rican and chinese	私は多くのドイツ人と中国と中国に住んでいました	n
person 1	i am impressed . do you have anything you do for fun ?	感心しました楽しんでいますか ？	n
person 2	yeah listen to blues music and prince	ブルース音楽と王子の話を聞いてくれ	n
person 1	great artists . i get so busy with the casino to do much more than that	偉大な芸術家だカジノに忙しい	n
person 2	well but you are doing something you love and making money	でも好きなものを作って金を稼ぐんだ	n
