# Supplementary material
Source: ML conference proceedings conference paper supplement (https://aclanthology.org/2022.eval4nlp-1.9)
Supplement: SupplementaryMaterial [file 1097.xlsx]

## Sheet: Sheet1
person	source	translation	evaluation: is this a good translation?
person 1	hello there . my name is jessica .	こんにちは私の名前はジェロカです	n
person 2	hey jessica , do you play any instruments ?	ジェロカ楽器を弾いてるか ？	n
person 1	i do not . but playing video games is my hobby .	そうじゃないけどビデオゲームは趣味なんだ	y
person 2	what kind of video games ?	どんなゲーム ？	n
person 1	all kinds . i also love soccer . watching and playing .	サッカーも大好き	n
person 2	ah ha , i play games with my 10 year old , but for myself i enjoy the piano	1 0 歳とゲームしてるけどピアノを楽しむのは楽しい	n
person 1	i would love to play piano . my brother bought a keyboard from best buy where he works .	兄は仕事から最高のキーボードを買ってくれた	n
person 2	it is a beautiful instrument , i would love to retire and become a music teacher .	素晴らしい楽器だ退職と音楽教師になりたい	n
person 1	wow . nice . i am hoping to move back to canada when i retire .	よかった退職したら戻ってみたいわ	n
person 2	canada is a lovely , i would love to live there . maybe i could do both !	私も住みたいわ私も一緒に住みたいわ	n
person 1	of course . pets for you ? milo and fio are my siamese cats .	もちろんペットのペットとヨーニは私の猫	n
person 2	no pets currently . my son is allergic . maybe later in life	ペットはいない、息子は後でアレルギーかもしれない	n
person 1	i see . that is too bad .	そうかそれは残念だな	y
person 2	it is ok , we do other things like go to the park or zoo	他にも公園や動物園に行きたいことがある	n
