# Supplementary material
Source: ML conference proceedings conference paper supplement (https://aclanthology.org/2022.eval4nlp-1.9)
Supplement: SupplementaryMaterial [file 1097.xlsx]

## Sheet: Sheet1
person	source	translation	evaluation: is this a good translation?
person 1	hello there . my name is jessica .	こんにちは。私の名前はジェシカ。	y
person 2	hey jessica , do you play any instruments ?	こんにちは、ジェシカ、何か楽器は弾く？	y
person 1	i do not . but playing video games is my hobby .	弾かない。でもテレビゲームをするのが私の趣味なの。	y
person 2	what kind of video games ?	どんなテレビゲーム？	y
person 1	all kinds . i also love soccer . watching and playing .	何でもやる。サッカーも大好き。観るのもするのも。	y
person 2	ah ha , i play games with my 10 year old , but for myself i enjoy the piano	そうなんだ、私、うちの１０才の子供とゲームをするけど、私自身はピアノが好き。	y
person 1	i would love to play piano . my brother bought a keyboard from best buy where he works .	私、ぜひピアノが弾きたい。兄が勤め先でお買い得のキーボードを買ったの。	y
person 2	it is a beautiful instrument , i would love to retire and become a music teacher .	ピアノは素晴らしい楽器よ、私、退職して音楽の先生になりたいの。	y
person 1	wow . nice . i am hoping to move back to canada when i retire .	うわあ、素敵。私は退職したらカナダへ戻ろうと思ってる。	y
person 2	canada is a lovely , i would love to live there . maybe i could do both !	カナダは素敵なところね、あそこに住みたいな。私、だぶん両方できるよね！	y
person 1	of course . pets for you ? milo and fio are my siamese cats .	もちろんよ。ペットはいる？ミロとフィオはうちのシャム猫なの。	y
person 2	no pets currently . my son is allergic . maybe later in life	今はペットは飼ってない。息子にアレルギーがあるから。飼うのは歳をとってからかな。	y
person 1	i see . that is too bad .	なるほど。それは残念。	y
person 2	it is ok , we do other things like go to the park or zoo	大丈夫よ、私たち公園や動物園に行ったりしてるから。	y
