# Supplementary material
Source: ML conference proceedings conference paper supplement (https://aclanthology.org/2022.eval4nlp-1.9)
Supplement: SupplementaryMaterial [file 1101.xlsx]

## Sheet: Sheet1
person	source	translation	evaluation: is this a good translation?
person 1	hello ! i am in college , studying business administration .	こんにちは！私は大学生で、経営学を勉強してる。	y
person 2	that is fantastic . i studied business administration in community college .	素晴らしい。私はコミュニティ・カレッジで経営学を勉強したわ。	y
person 1	nice ! what made you choose that ?	素敵！それを選んだ理由は？	y
person 2	i studied lots of stuff . it is a very applicable major .	いろいろ勉強したんだけどね。それがとても応用の効く専攻だからよ。	y
person 1	true . my parents are a dentist and a teacher , but i like the business side more .	その通りね。両親は歯医者と教師なんだけど、私は経営的なことの方が好き。	y
person 2	i own my own business , a salon . also , my hair is purple .	私、自分の会社があるの、サロンよ。それと、私の髪、紫よ。	y
person 1	i wish i could have purple hair , but my daycare job would not like it .	私も紫の髪にできたらいいけど、保育所の仕事では嫌がられるだろうな。	y
person 2	kids like purple though . are you married ? i am a newlywed .	子供たちは紫が好きだけどね。結婚はしてるの？私は新婚。	y
person 1	no , but i have been with my boyfriend for 2 years . have you been together long ?	いいえ、でも彼氏と付き合って二年になる。あなたは付き合って長いの？	y
person 2	a little over six years now . we have a houseboat together .	もう６年ちょっとになる。私たちハウスボートを持ってるの。	y
person 1	cool ! is it difficult to run your business while living on a boat ?	かっこいい！ボートで生活しながら会社を経営するのって難しい？	y
person 2	no , actually i run my business from the boat . it is a popular place .	ううん、実はね、ボートで商売をしてる。人気の場所なのよ。	y
person 1	you must not have much space for your salon work . was that hard to get used to ?	きっとサロンのお仕事のためのスペースはあまりないよね。慣れるのは大変だった？	y
person 2	the salon on our ship is the size of an end zone on a football field .	私たちの舟のサロンはフットボール場のエンドゾーンぐらいの大きさよ。	y
person 1	oh wow ! i am sure that is a very unique experience .	へえ、すごいな！きっととてもユニークな経験でしょうね。	y
person 2	tell me something about yourself .	あなたのことを教えて。	y
