# Supplementary material
Source: ML conference proceedings conference paper supplement (https://aclanthology.org/2022.eval4nlp-1.9)
Supplement: SupplementaryMaterial [file 1101.xlsx]

## Sheet: Sheet1
person	source	translation	evaluation: is this a good translation?
person 1	hello ! i am in college , studying business administration .	こんにちは大学で勉強をしています	n
person 2	that is fantastic . i studied business administration in community college .	大学で勉強していました	n
person 1	nice ! what made you choose that ?	何を選んだんだ ？	n
person 2	i studied lots of stuff . it is a very applicable major .	色々勉強したけど大きなケーブルみたいなものよ	n
person 1	true . my parents are a dentist and a teacher , but i like the business side more .	本当よ私の両親は歯医者で教師で教師で教師で教師で先生が好きなの	n
person 2	i own my own business , a salon . also , my hair is purple .	自分の仕事は自分の仕事よサロンも紫もね	n
person 1	i wish i could have purple hair , but my daycare job would not like it .	紫の髪がいいといいけど仕事が気に入らないわ	n
person 2	kids like purple though . are you married ? i am a newlywed .	でも紫の子供みたいに結婚してるの ？	n
person 1	no , but i have been with my boyfriend for 2 years . have you been together long ?	いいえでも ２ 年間彼氏と一緒にいたの	n
person 2	a little over six years now . we have a houseboat together .	今は ６ 年後には家と一緒に船があるんだ	n
person 1	cool ! is it difficult to run your business while living on a boat ?	ボートで一緒に暮らすのは大変なの ？	n
person 2	no , actually i run my business from the boat . it is a popular place .	船から私のビジネスを経営してるの人気のある場所よ	n
person 1	you must not have much space for your salon work . was that hard to get used to ?	サロンの仕事にはあまりスペースが足りないわね慣れたことないの ？	n
person 2	the salon on our ship is the size of an end zone on a football field .	私たちの船のサロンはフットボール場で一番大きい場所よ	n
person 1	oh wow ! i am sure that is a very unique experience .	素晴らしい経験だわ	n
person 2	tell me something about yourself .	***	n
