# Supplementary material
Source: ML conference proceedings conference paper supplement (https://aclanthology.org/2022.eval4nlp-1.9)
Supplement: SupplementaryMaterial [file 1104.xlsx]

## Sheet: Sheet1
person	source	translation	evaluation: is this a good translation?
person 1	hi , there ! i am just sitting here eating my fav thing pasta . hows you ?	ここで食事を食べてるだけよ	n
person 2	hi ! i m good . i just got home from my daily run and am relaxing now .	毎日から家に帰って緊張してるんだ	n
person 1	relaxation good . preferably with a good book . especially fiction .	いい言葉だな特に良い小説がある	n
person 2	reading is great . i also like watching basketball to unwind . do you like sports ?	読んでもいいわよスポーツは好き ？	n
person 1	no . between work and school i usually do not have time .	いや仕事と仕事の間はね普段はね	n
person 2	what are you studying in school ?	学校で何を勉強してるの ？	y
person 1	hospital administration . i go to a small community college .	病院です小さい大学に行くんです	n
person 2	nice , that s impressive ! and where are you working currently ?	すごいわねどこで働いてるの ？	n
person 1	a local hospital . clerical position for now . i am 20 , so i have got growth potential .	地元の病院で牧師が 2 0 代の成長能力を持ってるの	n
person 2	good for you ! do you live in the u . s . ?	あなたのために生きてるの ？	n
person 1	yes i do ! i hope to help shape the future of the health care industry .	ええ健康産業の将来を考えたいわ	y
person 2	that s a very admirable goal i live near ontario but i visit america regularly	私はアメリカ人に会いたいと思っていますが	n
