# Supplementary material
Source: ML conference proceedings conference paper supplement (https://aclanthology.org/2022.eval4nlp-1.9)
Supplement: SupplementaryMaterial [file 1104.xlsx]

## Sheet: Sheet1
person	source	translation	evaluation: is this a good translation?
person 1	hi , there ! i am just sitting here eating my fav thing pasta . hows you ?	こんにちは！ちょうどここに座って大好きなパスタを食べてる。元気？	y
person 2	hi ! i m good . i just got home from my daily run and am relaxing now .	やあ！元気だよ。ちょうど日課のランニングから帰ってきて今くつろいでいたところ。	y
person 1	relaxation good . preferably with a good book . especially fiction .	くつろぐことはいいことだね。良い本があればなおのこと。特にフィクション。	y
person 2	reading is great . i also like watching basketball to unwind . do you like sports ?	読書は楽しいよ。僕は野球を観てのんびりするのも好きだな。スポーツは好き？	y
person 1	no . between work and school i usually do not have time .	ううん。仕事と学校の往復で普段は時間がない。	y
person 2	what are you studying in school ?	学校で何を勉強してるの？	y
person 1	hospital administration . i go to a small community college .	病院管理学よ。小さなコミュニティ・カレッジに通ってる。	y
person 2	nice , that s impressive ! and where are you working currently ?	いいね、それは素晴らしい！で、今はどこで働いているの？	y
person 1	a local hospital . clerical position for now . i am 20 , so i have got growth potential .	地元の病院。今は事務職よ。私、二十歳なの、だから伸びる可能性がある。	y
person 2	good for you ! do you live in the u . s . ?	頑張って！アメリカに住んでるの？	y
person 1	yes i do ! i hope to help shape the future of the health care industry .	そうよ！医療産業の未来を作ることに貢献出来ればと思ってる。	y
person 2	that s a very admirable goal i live near ontario but i visit america regularly	それはとても素晴らしい目標だね。僕はオンタリオの近くに住んでいるけど、アメリカには定期的に行くよ。	y
