# Supplementary material
Source: ML conference proceedings conference paper supplement (https://aclanthology.org/2022.eval4nlp-1.9)
Supplement: SupplementaryMaterial [file 1105.xlsx]

## Sheet: Sheet1
person	source	translation	evaluation: is this a good translation?
person 1	hey there , that is up	こんにちは、元気？	y
person 2	hi there ! i am a musician !	こんにちは！私、音楽家なの！	y
person 1	that is cool . what kind of music	素敵。どんな音楽？	y
person 2	i love classical music what about you ?	クラシック音楽が大好き。あなたは？	y
person 1	i like almost any kind , do you like cooking ?	大体どんな音楽でも好き、料理は好き？	y
person 2	i love to cook ! especially from my own home grown food !	料理は大好き！特に自家製の食材を使って作ること！	y
person 1	i cook for my kids and love it . you have kids ?	私は子供たちのために食事を作るから料理は好き。お子さんはいるの？	y
person 2	i do not have any kids but i love to teach kids and give instrument lessons !	子供はいないけど、子供たちに教えたり、楽器のレッスンをしたりするのが好き!	y
person 1	oh you are a teacher ?	あら、あなた、先生なの？	y
person 2	yeah i am . what do you do ?	ええ、そうなの。あなたのお仕事は？	y
person 1	i stay at home with the kids	子供のいる専業主婦よ。	y
person 2	do you like to do anything for fun ?	何か楽しみはある？	y
person 1	i do take my girls shopping a lot	娘たちをしょっちゅう買い物に連れて行くわ。	y
person 2	very cool . i am sure you are a great parent !	とても素敵。きっとあなたは素晴らしい親御さんね！	y
person 1	i think i am . i love it	そうだと思う。子育ては大好きよ。	y
person 2	are your kids interested in music ?	お子さんたちは音楽に興味ある？	y
