# Supplementary material
Source: ML conference proceedings conference paper supplement (https://aclanthology.org/2022.eval4nlp-1.9)
Supplement: SupplementaryMaterial [file 1105.xlsx]

## Sheet: Sheet1
person	source	translation	evaluation: is this a good translation?
person 1	hey there , that is up	おいそこだ	n
person 2	hi there ! i am a musician !	俺は音楽家だ ！	n
person 1	that is cool . what kind of music	いい音楽だどんな音楽だ	n
person 2	i love classical music what about you ?	クラシック音楽が好きなのあなたは ？	n
person 1	i like almost any kind , do you like cooking ?	料理は好きかな ？	n
person 2	i love to cook ! especially from my own home grown food !	料理が好きなんだ特に俺の家からはね	n
person 1	i cook for my kids and love it . you have kids ?	子供たちのために料理を作って子供はいるか ？	n
person 2	i do not have any kids but i love to teach kids and give instrument lessons !	子供はいないけど子供を教えてあげたいの ！	n
person 1	oh you are a teacher ?	教師なの ？	n
person 2	yeah i am . what do you do ?	ええ何をしてるの ？	y
person 1	i stay at home with the kids	子供たちと家に残っている	y
person 2	do you like to do anything for fun ?	楽しいことしたい ？	y
person 1	i do take my girls shopping a lot	女の子を買い物に連れて行くわ	n
person 2	very cool . i am sure you are a great parent !	あなたは素晴らしい親だと思うわ	n
person 1	i think i am . i love it	そう思うわ愛してるわ	y
person 2	are your kids interested in music ?	子供たちは音楽に興味があるのか ？	n
