# Supplementary material
Source: ML conference proceedings conference paper supplement (https://aclanthology.org/2022.eval4nlp-1.9)
Supplement: SupplementaryMaterial [file 1106.xlsx]

## Sheet: Sheet1
person	source	translation	evaluation: is this a good translation?
person 1	please tell me your day has been better then mine .	君の日が良くなったと言ってくれ	n
person 2	no clue , mine has not been going too well either	分からないけどうまくいかなかったわ	n
person 1	i almost slipped up and let my parents know i am wiccan .	両親に知られたくない	n
person 2	what is wiccan ? i have not heard of it before	前に聞いたことがない	n
person 1	it is a religion based on being kind and treating others right .	宗教的な宗教だし他の人もそうよ	n
person 2	oh i take it you have a religious family	宗教家がいるのね	y
person 1	you would think so but no . my parents think religion is fake .	両親は宗教は偽物だと思っている	n
person 2	we are in the exact opposite situation then haha	私たちは正反対の状況にいる	y
person 1	are your parents overly religious ?	ご両親は宗教を過信していますか ？	y
person 2	my mother in law is sadly	私の母の法律はとても悲しいです	n
person 1	ugh , does she try to push her ways on you ?	彼女が君を突き飛ばしたのか ？	n
person 2	yes ! she gets pissed if me or my boyfriend disagrees with her on it	そうよ私か彼氏が反対したら怒られるわ	y
person 1	that sounds absolutely dreadful . i should introduce her to my folks .	最悪だわ家族に紹介しないと	n
person 2	it is and they would argue all night lol	一晩中議論していた	n
person 1	i cannot even imagine . i have to run , my garden center job called me in .	庭仕事で電話があった	n
person 2	well nice talking to you	話せてよかった	y
