# Supplementary material
Source: ML conference proceedings conference paper supplement (https://aclanthology.org/2022.eval4nlp-1.9)
Supplement: SupplementaryMaterial [file 1106.xlsx]

## Sheet: Sheet1
person	source	translation	evaluation: is this a good translation?
person 1	please tell me your day has been better then mine .	君は僕よりいい一日を過ごしたんだろうね。	y
person 2	no clue , mine has not been going too well either	どうかな、私の一日もあまりよくなかったけど。	y
person 1	i almost slipped up and let my parents know i am wiccan .	僕はもう少しでへまをして両親に自分がウイッカ信者だってこと知られるところだった。	y
person 2	what is wiccan ? i have not heard of it before	ウイッカ信者って何？初めて聞いた。	y
person 1	it is a religion based on being kind and treating others right .	思いやりを持って他人を大事にすることを中心にした宗教だよ。	y
person 2	oh i take it you have a religious family	へえ、信仰が厚いご家庭なんだ。	y
person 1	you would think so but no . my parents think religion is fake .	そう思うだろうね、でも違うんだ。両親は宗教をいんちきだと思っている。	y
person 2	we are in the exact opposite situation then haha	じゃあ、私たちは正反対の状況だ、はは。	y
person 1	are your parents overly religious ?	君のご両親は過度に信仰心が厚いの？	y
person 2	my mother in law is sadly	義理の母はひどい。	y
person 1	ugh , does she try to push her ways on you ?	うう、お母さん、君に自分のやり方を押し付けようとする？	y
person 2	yes ! she gets pissed if me or my boyfriend disagrees with her on it	その通り！私や彼氏がそのことで母に反対すると腹を立てる。	y
person 1	that sounds absolutely dreadful . i should introduce her to my folks .	それはすごく嫌だな。君のお母さんを僕の家族に紹介すべきだな。	y
person 2	it is and they would argue all night lol	ひどいよね、そしたらあの人たち一晩中言い争うだろうね。（笑）	y
person 1	i cannot even imagine . i have to run , my garden center job called me in .	想像すらできない。もう行かなきゃ、園芸用品店の仕事で呼ばれた。	y
person 2	well nice talking to you	ええと、お話できてよかったわ。	y
