# Supplementary material
Source: ML conference proceedings conference paper supplement (https://aclanthology.org/2022.eval4nlp-1.9)
Supplement: SupplementaryMaterial [file 1107.xlsx]

## Sheet: Sheet1
person	source	translation	evaluation: is this a good translation?
person 1	hello , how are you ? i love traveling , do you ?	旅は好きだよな ？	n
person 2	i do love traveling ! where are you from ?	旅行大好きよどこから来たの ？	y
person 1	i am from ny , how about you ?	私はおばあちゃんから来たのよあなたはどうなの ？	n
person 2	i am from ny as well ! what do you do for a living ?	私もよ何してるの ？	n
person 1	i am retired now but i used to be a teacher . now i travel .	私は引退したが教師だった今は旅をしていた	n
person 2	that must be nice . i am currently a programmer so that keeps me busy .	それは良かった私は今は私を忙しくさせてくれた	n
person 1	oh yes , i bet it does . it can be a lot of hard work .	そうかもしれないが大変な仕事になるかもしれない	n
person 2	yeah it can be . sometimes i enjoy it sometimes i do not .	そうかもしれない時々楽しい時もある	n
person 1	i guess that is most jobs . do you live in nyc ?	それが仕事だろ ？	n
person 2	no upstate new york . toward kings point . how about you ?	新しい州の王には見えないお前はどうだ ？	n
person 1	upstate for me too , just in the adirondack park .	私も州境に立っているだけだ	n
person 2	that is where my biological father is from ! we do not speak much though .	父が住んでいる生物学的には話せません	n
person 1	sorry to hear that . family difficulties can be difficult .	家族が大変なことになってしまって	n
person 2	yeah , i have a step father but he ignored me so growing up was ok .	父親がいても無視してくれたわ	n
