# Supplementary material
Source: ML conference proceedings conference paper supplement (https://aclanthology.org/2022.eval4nlp-1.9)
Supplement: SupplementaryMaterial [file 1107.xlsx]

## Sheet: Sheet1
person	source	translation	evaluation: is this a good translation?
person 1	hello , how are you ? i love traveling , do you ?	やあ、元気？僕は旅行が大好き、君は？	y
person 2	i do love traveling ! where are you from ?	私、旅行大好きよ！あなたは出身はどこ？	y
person 1	i am from ny , how about you ?	ニューヨーク出身、君は？	y
person 2	i am from ny as well ! what do you do for a living ?	私もニューヨークよ！仕事は何してるの？	y
person 1	i am retired now but i used to be a teacher . now i travel .	もう退職したけど、教師をしてた。今は旅行してる。	y
person 2	that must be nice . i am currently a programmer so that keeps me busy .	うらやましいな。私は今プログラマーをやってるからいつも忙しいの。	y
person 1	oh yes , i bet it does . it can be a lot of hard work .	ああ、そうだね、きっと忙しいよね、きつい仕事の連続になったりするからね。	y
person 2	yeah it can be . sometimes i enjoy it sometimes i do not .	ええ、そうね。楽しいときもあるけど、そうでないときもある。	y
person 1	i guess that is most jobs . do you live in nyc ?	たいていの仕事はそうだと思う。ニューヨーク市に住んでるの？	y
person 2	no upstate new york . toward kings point . how about you ?	ううん、ニューヨークの北部よ。キングズポイント方面。あなたは？	y
person 1	upstate for me too , just in the adirondack park .	僕も北部だよ、ちょうどアディロンダック公園の中だ。	y
person 2	that is where my biological father is from ! we do not speak much though .	そこは実の父の出身地よ！私たち、話しをすることはあまりないけど。	y
person 1	sorry to hear that . family difficulties can be difficult .	それは悲しいね。家族の問題は難しいことがあるから。	y
person 2	yeah , i have a step father but he ignored me so growing up was ok .	うん、継父がいるけど私を無視してた、だから大人になることは構わなかった。	y
