# Supplementary material
Source: ML conference proceedings conference paper supplement (https://aclanthology.org/2022.eval4nlp-1.9)
Supplement: SupplementaryMaterial [file 1113.xlsx]

## Sheet: Sheet1
person	source	translation	evaluation: is this a good translation?
person 1	hi how was your day today ?	やあ、今日はどうだった？	y
person 2	i was just taking a break , playing games before studying .	ちょうど休憩してたところ、勉強する前にゲームをやってる。	y
person 1	its always nice to have a break i hate school so far and want to move away	休憩はいつだっていいよね。僕はこれまでのところ学校が嫌いで家を出たいと思ってる。	y
person 2	where would you move to ?	行くならどこへ行きたい？	y
person 1	anywhere is better than here my dad is so hard on me and my siblings	ここ以外ならどこでもましだよ。親父が僕やきょうだいにとても厳しいんだ。	y
person 2	same . mine are so oblivious they do not even know i am gay .	同じだね。僕の両親は無関心すぎて僕がゲイだってことも知らない。	y
person 1	that is real sad have you tried to tell them	それはとても悲しいね。親に話をしようとはしたの？	y
person 2	i have , i am a masculine guy so i do not fit a stereotype for them .	やってみた、僕は筋肉質なので両親の固定観念に当てはまらないんだ。	y
person 1	oh wow well when the time is wrong they will find out . have you told a friend	ああ、そうなんだ、頃合いが悪ければ親も気付くよ。友達には話したの？	y
person 2	my friends all know and accept me thank goodness . you have any hobbies ?	友達はみんな知ってるし、ありがたいことに僕を受け入れてくれてる。何か趣味はある？	y
person 1	i mean right not wrong i am sorry . i listen to music	頃合いが悪いじゃなくて、頃合いになったらって意味ね、ごめん。僕は音楽を聴く。	y
person 2	no problem i understood . i love music . punk and american psychos are faves .	大丈夫、わかってるよ。僕、音楽大好きだよ。パンクとアメリカン・サイコは僕のお気に入り。	y
person 1	i like rock music and country music i can really relate to country	僕はロックとカントリー音楽が好き。カントリーには本当に共感できるんだ。	y
person 2	you should check out american psychos . they are from texas .	アメリカン・サイコは聴いてみた方がいい。テキサス出身のバンドだ。	y
