# Supplementary material
Source: ML conference proceedings conference paper supplement (https://aclanthology.org/2022.eval4nlp-1.9)
Supplement: SupplementaryMaterial [file 1113.xlsx]

## Sheet: Sheet1
person	source	translation	evaluation: is this a good translation?
person 1	hi how was your day today ?	今日はどうだった ？	n
person 2	i was just taking a break , playing games before studying .	勉強の前にゲームをしてたんだ	n
person 1	its always nice to have a break i hate school so far and want to move away	学校が嫌いになるのはいつも良いことだから	n
person 2	where would you move to ?	どこへ行くんだ ？	y
person 1	anywhere is better than here my dad is so hard on me and my siblings	パパと私の弟たちよりずっと下手なの	n
person 2	same . mine are so oblivious they do not even know i am gay .	私もよゲイだって知らないのよ	n
person 1	that is real sad have you tried to tell them	あなたが彼らに言おうとしたことは本当に悲しいことです	n
person 2	i have , i am a masculine guy so i do not fit a stereotype for them .	私は精巧な男だから私は彼らのためにステレオには向いてない	n
person 1	oh wow well when the time is wrong they will find out . have you told a friend	悪い時が来れば友人に話したでしょ	n
person 2	my friends all know and accept me thank goodness . you have any hobbies ?	友人にも感謝してくれて感謝してるわ	n
person 1	i mean right not wrong i am sorry . i listen to music	間違ってないわ音楽を聴けばいいの	n
person 2	no problem i understood . i love music . punk and american psychos are faves .	わかったわ音楽も音楽も音楽もゲームも大好きよ	n
person 1	i like rock music and country music i can really relate to country	音楽と音楽が好きなんだ国に戻るには遅くなる	n
person 2	you should check out american psychos . they are from texas .	アメリカの精神科医を調べてメールのようにメールしてる	n
