# Supplementary material
Source: ML conference proceedings conference paper supplement (https://aclanthology.org/2022.eval4nlp-1.9)
Supplement: SupplementaryMaterial [file 1119.xlsx]

## Sheet: Sheet1
person	source	translation	evaluation: is this a good translation?
person 1	hi . typing to you from above my wrecked beach that i love	（ 静流の声 ） こんにちは海の上から私の海が崩れるのが好きなの	n
person 2	that is exciting . i grew up near a beach in new hampshire .	すごいわ新しいビーチの近くで育ったの	n
person 1	cool . i am in school in florida	いいわフロリダの学校よ	y
person 2	very interesting . i am a dance teacher and i love dancing .	とても興味深い私はダンス教師で私はダンス教師でダンスが大好きなの	n
person 1	i like to dance but do not have a lot of time between both jobs and school	ダンスが好きなんだけど仕事と学校の間はあまり時間がないんだ	y
person 2	makes sense . i get all of my hobbies done at school . like reading history books .	わかるよ学校の本みたいにいろんなことを読んでたんだ	n
person 1	do you like other types of books ?	他の本が好きなの ？	n
person 2	i like cook books . my favorite are mexican food cook books .	好きな本が好きなのメキシコ料理が好きなの	n
person 1	yum . . do you have a favorite color ? mine is blue .	私の好きな色はブルー ？	n
person 2	i would say orange . i like blue as well .	オレンジと言えばブルーも好きだ	n
person 1	what do you like to do besides cooking ? i sing .	料理以外はどうする ？	n
person 2	mostly dancing ! i could dane to your singing .	ダンスが好きなんだ歌ってもいいかな ？	n
person 1	i like that idea . go on americas got talent .	アメリカ人の才能を手に入れた	n
person 2	we would do really well !	本当にうまくいくさ ！	y
person 1	i could use the bucks . where shall we meet to rehearse ?	私はお金を使用することができますどこでリハーサルをするのですか ？	n
person 2	well i am still in new hampshire !	私はまだニューハンプシャーにいるわ ！	n
