# Supplementary material
Source: ML conference proceedings conference paper supplement (https://aclanthology.org/2022.eval4nlp-1.9)
Supplement: SupplementaryMaterial [file 1119.xlsx]

## Sheet: Sheet1
person	source	translation	evaluation: is this a good translation?
person 1	hi . typing to you from above my wrecked beach that i love	こんにちは。荒れてしまったお気に入りのビーチを見下ろしながらタイプしてる。	y
person 2	that is exciting . i grew up near a beach in new hampshire .	すごいわね。私はニューハンプシャーの海岸近くで育ったの。	y
person 1	cool . i am in school in florida	いいね。僕はフロリダの学校に通ってる。	y
person 2	very interesting . i am a dance teacher and i love dancing .	興味津々。私はダンスを教えてて、踊るのが大好き。	y
person 1	i like to dance but do not have a lot of time between both jobs and school	踊るのは好きだけど、仕事と学校の往復であまり時間がない。	y
person 2	makes sense . i get all of my hobbies done at school . like reading history books .	なるほど。私は学校で趣味を全部終わらせるの。歴史の本を読むとかね。	y
person 1	do you like other types of books ?	他に好きな本はある？	y
person 2	i like cook books . my favorite are mexican food cook books .	料理の本は好き。お気に入りはメキシコ料理の本。	y
person 1	yum . . do you have a favorite color ? mine is blue .	美味しそう・・・。好きな色はある？僕は青。	y
person 2	i would say orange . i like blue as well .	私はオレンジかな。青も好きよ。	y
person 1	what do you like to do besides cooking ? i sing .	料理以外では何をするのが好き？僕は歌う。	y
person 2	mostly dancing ! i could dane to your singing .	たいてい踊ってる！あなたの歌に合わせて踊れるわよ。	y
person 1	i like that idea . go on americas got talent .	その考えいいね。アメリカズ・ゴット・タレントに出なよ。	y
person 2	we would do really well !	私たちなら本当にうまくやれそう！	y
person 1	i could use the bucks . where shall we meet to rehearse ?	お金があるといいんだけど。リハーサルするのにどこで会おうか？	y
person 2	well i am still in new hampshire !	あのね、私、まだニューハンプシャーにいるのよ！	y
