# Supplementary material
Source: ML conference proceedings conference paper supplement (https://aclanthology.org/2022.eval4nlp-1.9)
Supplement: SupplementaryMaterial [file 1120.xlsx]

## Sheet: Sheet1
person	source	translation	evaluation: is this a good translation?
person 1	hello ! how are you today ?	こんにちは今日はどうですか ？	y
person 2	very well , thank you and you ?	ありがとうあなたとあなたは ？	n
person 1	good ! how is your day going ?	今日はどうだ ？	n
person 2	great , just studying at the moment . i will be graduating this month !	勉強して勉強するから週末は卒業するわ ！	n
person 1	that is exciting ! what are you going to school for ?	すごいわね学校はどうするの ？	n
person 2	teaching ! i hope to find a job soon . it is hard now that school started	早く仕事を見つけたいわ学校が始まるのは大変よ	n
person 1	i understand ! i work in a pediatric doctors office	わかったわ精神科病院で働いてるの	n
person 2	wow ! do you ever work with children who just migrated to america ?	アメリカ人と仕事をしたことは ？	n
person 1	no , not yet , anyway . i mainly work with the big kids	まだありません私は子供と仕事をしています	n
person 2	that is still cool . i came to america when i was five	５ 歳の時にアメリカに来たんだ	n
person 1	that is awesome ! ! ! congrats ! do you like it ?	すごいな気に入ったか ？	n
person 2	i sure do ! i have a brother . do you have any siblings ?	兄弟がいるんだ兄弟はいるか ？	n
