# Supplementary material
Source: ML conference proceedings conference paper supplement (https://aclanthology.org/2022.eval4nlp-1.9)
Supplement: SupplementaryMaterial [file 1120.xlsx]

## Sheet: Sheet1
person	source	translation	evaluation: is this a good translation?
person 1	hello ! how are you today ?	こんにちは！元気？	n
person 2	very well , thank you and you ?	とても元気、ありがとう、あなたは？	y
person 1	good ! how is your day going ?	元気だよ！今日の調子はどう？	n
person 2	great , just studying at the moment . i will be graduating this month !	とてもいいわ、ちょうど今勉強していたところ。今月卒業するの！	y
person 1	that is exciting ! what are you going to school for ?	それは楽しみだ！学校へは何の勉強をしに行ってるの？	y
person 2	teaching ! i hope to find a job soon . it is hard now that school started	教授法よ！すぐに就職先を見つけたい。学校が始まってしまったから難しいの。	n
person 1	i understand ! i work in a pediatric doctors office	なるほど！僕は小児科病院で働いてる。	y
person 2	wow ! do you ever work with children who just migrated to america ?	へえ！アメリカへ移住してきたばかりの子供たちを扱うことってある？	y
person 1	no , not yet , anyway . i mainly work with the big kids	いや、まだない、とりあえずね。 僕は主に大きい子供を相手にしてるから。	y
person 2	that is still cool . i came to america when i was five	それでもすごいわ。私、５才のときにアメリカへ来たの。	y
person 1	that is awesome ! ! ! congrats ! do you like it ?	それは素晴らしい！！！おめでとう！満足してる？	y
person 2	i sure do ! i have a brother . do you have any siblings ?	もちろんよ！私、弟がいるの。あなたはご兄弟は？	y
