# Supplementary material
Source: ML conference proceedings conference paper supplement (https://aclanthology.org/2022.eval4nlp-1.9)
Supplement: SupplementaryMaterial [file 1129.xlsx]

## Sheet: Sheet1
person	source	translation	evaluation: is this a good translation?
person 1	hi ! abigail and me are ten ! i cannot wait for tomorrow	明日の朝 1 0 時に待ってられないんだ	n
person 2	hey there , nice to meet you . whats happening tomorrow ?	明日のことはどうなってるの ？	n
person 1	first day for safety patrol ! i excited about it too .	警備員の初の日だそれも嬉しい	n
person 2	awesome , since i work at home i do not get outside much , must be nice .	家で仕事が忙しくて外に出ない方がいいだろうな	n
person 1	that not good . i go to martial arts class after school . its fun .	それはまずい学校の後は武道会に行く	n
person 2	interesting ! maybe i can learn a thing or two and teach my cheerleaders some skills .	面白いわねチアリーダーとチアリーダーの知識を教えてあげるわ	n
person 1	yes . its totally fun . not as fun as what harry potter does . wish i was a wizard .	そうだ楽しんでくれ魔法使いになりたいと願っていたんだ	n
person 2	how funny i was watching him last night while i made my family dinner !	昨夜彼を見て驚いたわ家族の夕食を作ったのに ！	n
person 1	that is good . i rather read the books i love reading .	本を読んだ方がいいわ	n
person 2	i read to my kids each night they love it .	一晩中子供達が大好きだった	n
person 1	that is good . my mommy reads to me too .	いいわねママも読んでくれた	n
person 2	let me guess the harry potter series ?	ハースト･プロセッサーかな ？	n
person 1	yes . i have all the books !	はい本は全部あります ！	y
person 2	lucky , which one is your favorite ?	幸運にも、あなたの好きな人は誰 ？	n
person 1	sorcerer stone . what your favorite one ?	魔術師の石好きなのは何だ ？	n
person 2	um . . . they are too good for me to decide between them . . .	彼らとの間では決められないの	n
