# Supplementary material
Source: ML conference proceedings conference paper supplement (https://aclanthology.org/2022.eval4nlp-1.9)
Supplement: SupplementaryMaterial [file 1129.xlsx]

## Sheet: Sheet1
person	source	translation	evaluation: is this a good translation?
person 1	hi ! abigail and me are ten ! i cannot wait for tomorrow	こんにちは！アビゲイルと僕は１０才！明日が待ち遠しい。	y
person 2	hey there , nice to meet you . whats happening tomorrow ?	こんにちは、初めまして。明日は何があるの？	y
person 1	first day for safety patrol ! i excited about it too .	安全パトロールの一日目だよ！僕も楽しみなんだ。	y
person 2	awesome , since i work at home i do not get outside much , must be nice .	素敵ね、私、家で仕事してるから外へはあまり出ないの、きっと楽しいわね。	y
person 1	that not good . i go to martial arts class after school . its fun .	それはよくないね。僕は放課後、格闘技のクラスに行ってる。楽しいよ。	y
person 2	interesting ! maybe i can learn a thing or two and teach my cheerleaders some skills .	いいわね！何かしら学んで、受け持ってるチアリーダーたちにスキルを教えられるかも。	y
person 1	yes . its totally fun . not as fun as what harry potter does . wish i was a wizard .	うん、すっごく楽しいよ。ハリーポッターがやってることほど楽しくはないけどね。僕が魔法使いだったらなあ。	y
person 2	how funny i was watching him last night while i made my family dinner !	奇遇ね。昨夜、家族に夕飯を作っていたときにハリーを観てたわよ！	y
person 1	that is good . i rather read the books i love reading .	いいね。僕は本で読むほうがいい。読書が好きなんだ。	y
person 2	i read to my kids each night they love it .	私は毎晩子供たちに本を読んであげるの。子供たち、それが大好きなの。	y
person 1	that is good . my mommy reads to me too .	素敵。僕のママも読んでくれるよ。	y
person 2	let me guess the harry potter series ?	えっと、ハリーポッターシリーズのことかしら？	y
person 1	yes . i have all the books !	そうだよ。僕、全巻持ってる！	y
person 2	lucky , which one is your favorite ?	いいわね、お気に入りはどれ？	y
person 1	sorcerer stone . what your favorite one ?	賢者の石。あなたが好きなのは何？	y
person 2	um . . . they are too good for me to decide between them . . .	うーん・・・。どれもいいから私には決められないな・・・。	y
