# Supplementary material
Source: ML conference proceedings conference paper supplement (https://aclanthology.org/2022.eval4nlp-1.9)
Supplement: SupplementaryMaterial [file 1132.xlsx]

## Sheet: Sheet1
person	source	translation	evaluation: is this a good translation?
person 1	hey there , how are you ? i am craving sour gummies right now .	こんにちは、元気？今、酸っぱいグミが食べたくてしようがない。	y
person 2	wow that would be good , i am an avid movie attendee and love candy and popcorn	わあ、それはいいかも、僕、大の映画好きでキャンディとポップコーンが大好き。	y
person 1	what movies do you like ? i am a nanny and take kids to movies .	どんな映画が好き？私はナニーをやってて、子供たちを映画に連れていったりするの。	y
person 2	i like all kinds , i have a big friend group and we love to go together .	どんな映画も好き、大人数の友達グループがあって、いっしょに行くのが好きなんだ。	y
person 1	oh that is awesome . i am engaged so hopefully i can go with my kids .	まあ、それはすごいわね。私、婚約してるから、できれば自分の子供たちと行きたいの。	y
person 2	congrats ! it is just me for now	おめでとう！僕は今のところ一人。	y
person 1	oh you will find someone i am sure of it !	ああ、いい人が見つかるわ、絶対！	y
person 2	i am in a book club where hopefully i can meet someone special	読書クラブに入ってるから、そこで誰か特別な人と出会えたらいいな。	y
person 1	that is cool . i drive my benz to book clubs occasionally .	それは素敵ね。私、時々自分のベンツを運転して読書クラブに行くの。	y
person 2	that is a fast car ! i love driving through the country	それって高速車だね！僕は全国、車を走らせるのが大好き。	n
person 1	what kind of car do you have ?	どんな車を持ってるの？	y
person 2	a convertible but nothing fancy	オープンカーだけど全然高級車じゃない。	y
person 1	that is cool . so tell me more about yourself !	いいじゃない。ねえ、もっとあなたのこと教えて！	y
person 2	not much exciting to tell , i am a book worm who likes cars . not much to me !	取り立てて面白い話はないよ、僕は車好きの本の虫。特に何もないよ！	y
