# Supplementary material
Source: ML conference proceedings conference paper supplement (https://aclanthology.org/2022.eval4nlp-1.9)
Supplement: SupplementaryMaterial [file 1132.xlsx]

## Sheet: Sheet1
person	source	translation	evaluation: is this a good translation?
person 1	hey there , how are you ? i am craving sour gummies right now .	やあ元気かい ？	n
person 2	wow that would be good , i am an avid movie attendee and love candy and popcorn	僕は映画監督でポップコーンとポップコーン	n
person 1	what movies do you like ? i am a nanny and take kids to movies .	子供と映画に行く映画はどう ？	n
person 2	i like all kinds , i have a big friend group and we love to go together .	友達がたくさんいるし一緒に行きたい	n
person 1	oh that is awesome . i am engaged so hopefully i can go with my kids .	よかったわ子供と一緒に行ってもいいかしら ？	n
person 2	congrats ! it is just me for now	今は俺だけだ	n
person 1	oh you will find someone i am sure of it !	確かな人を見つけられるわ ！	n
person 2	i am in a book club where hopefully i can meet someone special	私はクラブにいる特別な人に会うことができる場所に	n
person 1	that is cool . i drive my benz to book clubs occasionally .	かっこいいわね時々私はクラブの本を読むのが好きなの	n
person 2	that is a fast car ! i love driving through the country	それは早い車だ国を通るのが好きなんだ	n
person 1	what kind of car do you have ?	どんな車がある ？	n
person 2	a convertible but nothing fancy	コンバーチブルだけど素敵なものは何もない	n
person 1	that is cool . so tell me more about yourself !	それは良かったもっと自分のことを話してくれ ！	y
person 2	not much exciting to tell , i am a book worm who likes cars . not much to me !	私は車が好きな人だなんて言うほど興奮しないでくれ ！	n
