# Supplementary material
Source: ML conference proceedings conference paper supplement (https://aclanthology.org/2022.eval4nlp-1.9)
Supplement: SupplementaryMaterial [file 1135.xlsx]

## Sheet: Sheet1
person	source	translation	evaluation: is this a good translation?
person 1	hello , my names mary . how are you doing today ?	こんにちはメアリーですご機嫌いかがですか ？	y
person 2	i am well , thank you . how are you ?	元気だよありがとう元気か ？	y
person 1	could be better . super busy because i am a fulltime student studying radiology	（ 哲希 ） いいほうがいいかもな俺は学生の頃から勉強してんだよ	n
person 2	oh , that sounds good ! i go to nyu . i am a freshman .	（ 哲希 ） そりゃいいや俺は一年に一年生に行くんだよ	n
person 1	very cool ! do you also work while you are in school ?	学校でも仕事してるのか ？	n
person 2	no , but i have a hobby . i love photography !	趣味があるけど写真好きなんだ	n
person 1	very nice ! do you have ample time to take photographs ?	写真を撮る時間はあるか ？	n
person 2	i would not say ample , but some . whats your favorite color ? mine is blue .	私の好きな色は青いわ	n
person 1	mine is blue too ! what do you study ?	私も青なの何を勉強してるの ？	y
person 2	art like my father . we are passionate about it . i am the baby of the family .	父のように情熱的で家族の赤ん坊だ	n
person 1	sounds like you are from an artistic family !	芸術家から来たようだな ！	n
person 2	yes , i would say so . i have got two brothers , who are older . they are artistic as well .	そうだな俺には兄が ２ 人いるんだ年をとった兄弟もいる	n
person 1	my dad is a doctor so i sometimes work as a receptionist at his office	父は医者で彼のオフィスで仕事をしている時もある	n
person 2	that sounds interesting . do you like it ?	面白いね気に入った ？	y
