# Supplementary material
Source: ML conference proceedings conference paper supplement (https://aclanthology.org/2022.eval4nlp-1.9)
Supplement: SupplementaryMaterial [file 1135.xlsx]

## Sheet: Sheet1
person	source	translation	evaluation: is this a good translation?
person 1	hello , my names mary . how are you doing today ?	こんにちは、私の名前はメアリー。今日は調子どう？	y
person 2	i am well , thank you . how are you ?	元気だよ、ありがとう。君はどう？	y
person 1	could be better . super busy because i am a fulltime student studying radiology	いまいちね。私、放射線学を勉強してるフルタイムの学生だからすごく忙しい。	y
person 2	oh , that sounds good ! i go to nyu . i am a freshman .	ああ、それはいいね！僕はニューヨーク大学へ行ってる。一年生だ。	y
person 1	very cool ! do you also work while you are in school ?	すごいね！あなたも学校へ行きながら仕事してるの？	y
person 2	no , but i have a hobby . i love photography !	いいや、でも趣味はあるよ。写真が大好きなんだ！	y
person 1	very nice ! do you have ample time to take photographs ?	とても素敵！写真を撮る時間は十分あるの？	y
person 2	i would not say ample , but some . whats your favorite color ? mine is blue .	十分とは言えないけど、少しはある。君の大好きな色は何？僕は青。	y
person 1	mine is blue too ! what do you study ?	私も青よ！あなたは何を勉強してるの？	y
person 2	art like my father . we are passionate about it . i am the baby of the family .	親父と同じで芸術。僕らは芸術に情熱を傾けてる。僕は家族の中で一番若いんだ。	y
person 1	sounds like you are from an artistic family !	あなたは芸術一家で育ったみたいね。	y
person 2	yes , i would say so . i have got two brothers , who are older . they are artistic as well .	うん、そうだと思う。兄が二人いるんだけど、二人とも芸術家だ。	y
person 1	my dad is a doctor so i sometimes work as a receptionist at his office	私の父は医者なの、だからときどき父の病院で受付係として働くの。	y
person 2	that sounds interesting . do you like it ?	それは面白そうだね。その仕事は好き？	y
