# Supplementary material
Source: ML conference proceedings conference paper supplement (https://aclanthology.org/2022.eval4nlp-1.9)
Supplement: SupplementaryMaterial [file 1137.xlsx]

## Sheet: Sheet1
person	source	translation	evaluation: is this a good translation?
person 1	hi , how are you doing today ?	こんにちは、今日は調子どう？	y
person 2	i am doing well . i am perusing my law degree . and you ?	元気だよ。法律の学位を取るために勉強してる、君は？	y
person 1	sounds hard work ! i am starting an internship next week	大変そうだね！僕は来週インターンシップを開始する予定。	y
person 2	cool . yeah , i attended college once already . never finished though .	いいね。えっと、僕は昔すでに大学に通ってたんだ。卒業できなかったけど。	y
person 1	these things happen ! good you are giving it a go though	よくある話だ！でも挑戦してみるのはいいことだ。	y
person 2	yeah , being the youngest of 3 siblings i have to stand out .	うん、三人きょうだいの一番下なので頑張らないといけないんだ。	y
person 1	i know that feeling . my internship is at a construction site .	その気持ちわかるよ。僕のインターンシップは建設現場だよ。	y
person 2	interesting . i am not good at manual work . i do play tennis though	面白いね。僕は肉体労働は苦手。テニスはするけどね。	y
person 1	i have not played tennis in forever . what kind of moves do you like ?	ずっとテニスはしてないな。君はどんな映画が好き？	y
person 2	too many to name . what about you ?	多すぎて挙げられない。君は？	y
person 1	i really like action and adventures ones . but think i like popcorn the best	僕はアクションと冒険ものが大好きだ。でも一番好きなのはポップコーンだろうな。	y
person 2	i love popcorn . used to stop after school in chicago . they had the best .	僕、ポップコーン大好きだよ。シカゴでは放課後よく立ち寄ったな。あそこのは一番美味しかった。	y
person 1	i am jealous ! what else are you into ?	うらやましいな！他にはまってるものある？	y
person 2	should not be . you could take a trip to chicago . i like traveling .	うらやましがるようなことじゃないよ。シカゴに旅行すればいい。僕は旅行が好き。	y
person 1	i love travelling ! i am a theme park nut and love visiting new ones	僕、旅行大好き！テーマパークマニアで新しいところに行くのが好きなんだ。	y
person 2	that is exciting . i have only been a couple times .	それは楽しいね。僕は２，３回しか行ったことない。	y
