# Supplementary material
Source: ML conference proceedings conference paper supplement (https://aclanthology.org/2022.eval4nlp-1.9)
Supplement: SupplementaryMaterial [file 1137.xlsx]

## Sheet: Sheet1
person	source	translation	evaluation: is this a good translation?
person 1	hi , how are you doing today ?	今日はどうしてる ？	n
person 2	i am doing well . i am perusing my law degree . and you ?	元気だ法律を使ってる君と君は ？	n
person 1	sounds hard work ! i am starting an internship next week	来週から仕事が山積みなんだ	n
person 2	cool . yeah , i attended college once already . never finished though .	いいわ大学は卒業したけどもう終わってないの	n
person 1	these things happen ! good you are giving it a go though	いいことが起きただがこれで終わりだ	n
person 2	yeah , being the youngest of 3 siblings i have to stand out .	ああ ３ 人の兄弟の中で立った方がいい	n
person 1	i know that feeling . my internship is at a construction site .	気分は分かるけど私の船は建設現場にあるの	n
person 2	interesting . i am not good at manual work . i do play tennis though	興味深いなマニュアルでは無理だがテニスをやってるんだ	n
person 1	i have not played tennis in forever . what kind of moves do you like ?	テニスは永遠にしてないどんな動きが好きなんだ ？	n
person 2	too many to name . what about you ?	名前も多すぎるわあなたは ？	n
person 1	i really like action and adventures ones . but think i like popcorn the best	アクションと冒険は好きだがポップコーンは最高だと思う	y
person 2	i love popcorn . used to stop after school in chicago . they had the best .	私はポップコーンが大好きですシカゴでは学校の後は止められませんでした	n
person 1	i am jealous ! what else are you into ?	私は嫉妬しています他に何をしているのですか ？	y
person 2	should not be . you could take a trip to chicago . i like traveling .	そうでないとシカゴに旅行してもいいわ旅行が好きなの	n
person 1	i love travelling ! i am a theme park nut and love visiting new ones	旅行旅行は大好きなの新しいキャップを見るのが好きなの	n
person 2	that is exciting . i have only been a couple times .	ワクワクするわ ２ 回しか来てないの	y
