# Supplementary material
Source: ML conference proceedings conference paper supplement (https://aclanthology.org/2022.eval4nlp-1.9)
Supplement: SupplementaryMaterial [file 1139.xlsx]

## Sheet: Sheet1
person	source	translation	evaluation: is this a good translation?
person 1	hello ! how are you ?	やあ！元気？	y
person 2	good thank you for asking .	元気だよ、ありがとう。	y
person 1	do you have any hobbies ?	何か趣味はある？	y
person 2	i enjoy riding my motorcycle , and you ?	バイクに乗るのが好きだ、君は？	y
person 1	i fly planes and enjoy the wilderness .	飛行機を操縦して手つかずの自然を楽しむ。	y
person 2	that sounds exciting .	それは面白そうだ。	y
person 1	so is riding motorcycles . it is , though . i love it .	バイクに乗るのも本当に面白いよね。僕は大好きだ。	y
person 2	so do i , i just wish i had a harley .	僕もだよ、ハーレーを持っていたらなあ。	y
person 1	why do not you have one ?	どうして持ってないの？	y
person 2	saving some money . i took a job cleaning gutter this past week .	お金を節約中なんだ。この一週間、雨どいの掃除の仕事をした。	y
person 1	do you enjoy it ?	その仕事、楽しい？	y
person 2	some what . what do you do for work ?	ちょっとはね。君は何の仕事してるの？	y
