# Supplementary material
Source: ML conference proceedings conference paper supplement (https://aclanthology.org/2022.eval4nlp-1.9)
Supplement: SupplementaryMaterial [file 1139.xlsx]

## Sheet: Sheet1
person	source	translation	evaluation: is this a good translation?
person 1	hello ! how are you ?	やあ元気か ？	y
person 2	good thank you for asking .	聞いてくれてありがとう	n
person 1	do you have any hobbies ?	ホットチョコレートあるか ？	n
person 2	i enjoy riding my motorcycle , and you ?	私のバイクを楽しんであなたとあなたは ？	n
person 1	i fly planes and enjoy the wilderness .	私は飛行機を飛ばして荒野を楽しんでいる	y
person 2	that sounds exciting .	楽しそうだな	y
person 1	so is riding motorcycles . it is , though . i love it .	バイクに乗るのが好きなんだ	n
person 2	so do i , i just wish i had a harley .	ハーリーが欲しいんだ	n
person 1	why do not you have one ?	なぜ持ってないの ？	y
person 2	saving some money . i took a job cleaning gutter this past week .	金を貯めて先週掃除したんだ	n
person 1	do you enjoy it ?	楽しんでるか ？	y
person 2	some what . what do you do for work ?	何のために仕事を ？	n
