# Supplementary material
Source: ML conference proceedings conference paper supplement (https://aclanthology.org/2022.eval4nlp-1.9)
Supplement: SupplementaryMaterial [file 1142.xlsx]

## Sheet: Sheet1
person	source	translation	evaluation: is this a good translation?
person 1	hey there . do you enjoy baking ?	こんにちは。お菓子作りは好き？	y
person 2	no , i do not . i like photography . are you a baker ?	ううん、好きじゃない。私は写真が好き。あなたはパン屋さん？	y
person 1	i just enjoy baking cakes . i just finished a lovely one .	ただケーキを焼くのが好きなだけよ。ちょうどかわいいのを作り終えたところ。	y
person 2	was it for a special occasion ?	何か特別な日のためだったの？	y
person 1	it is my twin brothers anniversary tomorrow .	明日、双子の弟たちの誕生日なの。	y
person 2	that is cool . do you need a photographer ?	それは素敵ね。カメラマンはいらない？	y
person 1	i am sure they would love to have the event captured on film .	あの子たち、きっとイベントをビデオに残したら喜ぶわ。	y
person 2	well i am available . i spend a lot of money on my photography equipment .	ええと、私、空いてるよ。写真の機材に大金をつぎ込んじゃうのよね。	y
person 1	what sort of events do you normally photograph ?	いつもはどんなイベントを撮影するの？	y
person 2	i do mostly weddings but elegant or upscale parties too .	たいていは結婚式、でもエレガントで高級なパーティもやるわ。	y
person 1	that sounds interesting . i performed at a big wedding last week .	それは興味深いわね。私は先週、大人数の結婚式で披露したわ。	y
person 2	what was your performance ? are you a singer ?	何をやったの？あなた、歌手なの？	y
person 1	i am actually a tap dancer . i have won many competitions .	私、実はタップダンサーなの。大会で何回も優勝したことある。	y
person 2	that sounds awesome . i could photograph you too .	それはすごいわね。私、あなたの写真も撮れるわよ。	y
person 1	i would not object . that would look good in my portfolio .	いいわね。私のプロフィール写真に良さそう。	y
person 2	that is great . how long have you been dancing ?	素晴らしい。ダンスを始めてもう何年になるの？	y
