# Supplementary material
Source: ML conference proceedings conference paper supplement (https://aclanthology.org/2022.eval4nlp-1.9)
Supplement: SupplementaryMaterial [file 1142.xlsx]

## Sheet: Sheet1
person	source	translation	evaluation: is this a good translation?
person 1	hey there . do you enjoy baking ?	お風呂はどうですか ？	n
person 2	no , i do not . i like photography . are you a baker ?	写真が好きなんだ君はパン屋か ？	n
person 1	i just enjoy baking cakes . i just finished a lovely one .	ケーキを楽しんでるだけだいい １ 杯だけだよ	n
person 2	was it for a special occasion ?	特別な日でしたか ？	n
person 1	it is my twin brothers anniversary tomorrow .	明日双子の兄弟の記念日です	y
person 2	that is cool . do you need a photographer ?	いいわ写真が欲しいの ？	n
person 1	i am sure they would love to have the event captured on film .	映画で逮捕されたいと思うわ	n
person 2	well i am available . i spend a lot of money on my photography equipment .	写真に大金をかけてるんだ	n
person 1	what sort of events do you normally photograph ?	普通の写真はどうだ ？	n
person 2	i do mostly weddings but elegant or upscale parties too .	いつものことだがとても上品で上品なパーティでもある	n
person 1	that sounds interesting . i performed at a big wedding last week .	先週大きな結婚式で大きな結婚式をやっていました	n
person 2	what was your performance ? are you a singer ?	君の演技は何だった ？	n
person 1	i am actually a tap dancer . i have won many competitions .	私は実際にダンスダンサーです私は多くの競争相手をしてきました	n
person 2	that sounds awesome . i could photograph you too .	いいわね写真も撮ってあげるわ	n
person 1	i would not object . that would look good in my portfolio .	そんなことないわ私の遺書を見るといいわ	n
person 2	that is great . how long have you been dancing ?	それはよかったどれくらい踊っていたんだ ？	n
