# Supplementary material
Source: ML conference proceedings conference paper supplement (https://aclanthology.org/2022.eval4nlp-1.9)
Supplement: SupplementaryMaterial [file 1144.xlsx]

## Sheet: Sheet1
person	source	translation	evaluation: is this a good translation?
person 1	hi there , how are you today ?	やあ、元気？	y
person 2	i am wonderful how are you	とても元気よ、あなたは？	y
person 1	good , just looking into a trip to the desert .	元気だよ、ちょうど砂漠旅行を検討してるところ。	y
person 2	desert sounds boring but i would take my cat	砂漠は退屈そう、でも私なら猫を連れてくわ。	y
person 1	oh yea , you must love your cat . what color are your eyes ?	ああ、そうか、君は猫が好きなんだね。君の目の色は何？	y
person 2	my eyes are blue any my hair is dark brown you ?	目は青で髪はダークブラウン。あなたは？	y
person 1	i have bright blue eyes , brown hair too .	目は明るい青で、髪は僕も茶色。	y
person 2	awesome we are twins . i workout also	すごい、私たち双子ね。私、運動もするわよ。	y
person 1	oh i do not but should . i like eating meat .	へえ、僕はしない、でもした方がいいな。僕は肉が好物。	y
person 2	me too and game of thrones is so good	私もよ、ゲーム・オブ・スローンズってとてもいいよね。	y
person 1	i love it too ! it is so good .	僕も大好きだ！すごく面白い。	y
person 2	yes it is and wentworth too	うん、それにウェントワース女子刑務所もね。	y
person 1	oh i have not watched it , its on netflix right ?	ああ、僕、それは観たことないな、ネットフリックスでやってるよね？	y
person 2	yes and its like orange is the new black	うん、オレンジ・イズ・ニュー・ブラックみたいなのよ。	y
person 1	i will have to check it out	チェックしなきゃ。	y
person 2	yes and then you can thank me later ahahah	そうね、それならお礼は後でいいわ、あはは。	y
