# Supplementary material
Source: ML conference proceedings conference paper supplement (https://aclanthology.org/2022.eval4nlp-1.9)
Supplement: SupplementaryMaterial [file 1144.xlsx]

## Sheet: Sheet1
person	source	translation	evaluation: is this a good translation?
person 1	hi there , how are you today ?	こんにちは、こんにちは、今日はどのように ？	n
person 2	i am wonderful how are you	私はあなたが元気です	n
person 1	good , just looking into a trip to the desert .	砂漠に旅行を探してただけだ	n
person 2	desert sounds boring but i would take my cat	砂漠は退屈だが猫を連れて行く	y
person 1	oh yea , you must love your cat . what color are your eyes ?	猫を愛してるでしょ目の色は何色 ？	n
person 2	my eyes are blue any my hair is dark brown you ?	私の目は青色な髪はあなたなの ？	n
person 1	i have bright blue eyes , brown hair too .	青い目も茶色の髪もある	n
person 2	awesome we are twins . i workout also	素晴らしい双子だし仕事もあるし	n
person 1	oh i do not but should . i like eating meat .	そうはさせないけど肉も食べたいわ	n
person 2	me too and game of thrones is so good	私も同じゲームをするのが得意なの	n
person 1	i love it too ! it is so good .	私も大好きよ ！	n
person 2	yes it is and wentworth too	それに価値もあるわ	n
person 1	oh i have not watched it , its on netflix right ?	ネットで見たことないだろ ？	n
person 2	yes and its like orange is the new black	そうオレンジとオレンジは新しい色だ	n
person 1	i will have to check it out	調べないと	y
person 2	yes and then you can thank me later ahahah	そして、その後、あなたは私に感謝することができます	n
