# Supplementary material
Source: ML conference proceedings conference paper supplement (https://aclanthology.org/2022.eval4nlp-1.9)
Supplement: SupplementaryMaterial [file 1147.xlsx]

## Sheet: Sheet1
person	source	translation	evaluation: is this a good translation?
person 1	hello out there ! its evening here how about you ?	こんにちは！こちらは夜だけど、君のところは？	y
person 2	just got of work at the deli . its time to chill with my guitar .	ちょうど惣菜販売店の仕事が終わったところ。ギターでくつろぐ時間だ。	y
person 1	nice ! what sort of stuff do you play ?	いいね！どんな曲を弾くの？	y
person 2	i am still learning , working on basic chords right now , but i love jim hendrix .	まだ勉強中で、今、基本のコードを練習してる、でもジミ・ヘンドリックスが大好きなんだ。	y
person 1	jim was a genius . how long have you been learning ?	ジミは天才だった。習い始めてどれくらい？	y
person 2	just a couple months . it took me awhile to save up and get lessons .	まだ２，３か月。お金を貯めてレッスンを受けるまで時間がかかったんだ。	y
person 1	hope that goes well for you ! no such thing as too many guitar players .	うまくいくといいね！ギタリストが多すぎるて困るなんてことはないから。	y
person 2	thanks . so what are your hobbies ? i like to fish when not practicing or working .	ありがとう。で、君の趣味は何？僕は練習や仕事をしてないときは釣りをするのが好き。	y
person 1	i am more or less a book nerd . a sci fi book nerd .	僕はほぼ本オタク。SF小説オタクだ。	y
person 2	nerds are cool in their own way . so are you are star wars or star trek fan ?	オタクはマイペースでかっこいいよ。で、君はスターウォーズファン？それともスタートレックファン？	y
person 1	star trek . old school , you know . you ?	スタートレック。時代遅れでしょ。君は？	y
person 2	oh yeah . my dad grew up on those and shared them with me .	そうかな。僕の父はそれ見て育ったし、僕も一緒に楽しんだよ。	n
