# Supplementary material
Source: ML conference proceedings conference paper supplement (https://aclanthology.org/2022.eval4nlp-1.9)
Supplement: SupplementaryMaterial [file 1147.xlsx]

## Sheet: Sheet1
person	source	translation	evaluation: is this a good translation?
person 1	hello out there ! its evening here how about you ?	今晩はどうだ ？	n
person 2	just got of work at the deli . its time to chill with my guitar .	ギターで遊んでるだけだよ	n
person 1	nice ! what sort of stuff do you play ?	いいわね何をやってるの ？	n
person 2	i am still learning , working on basic chords right now , but i love jim hendrix .	今でも勉強しているがジムは大好きだ	n
person 1	jim was a genius . how long have you been learning ?	ジムは天才だったいつから勉強していた ？	n
person 2	just a couple months . it took me awhile to save up and get lessons .	２ ， ３ ヶ月だけ助けてくれた勉強を手伝ってくれたんだ	n
person 1	hope that goes well for you ! no such thing as too many guitar players .	ギターの練習もしない方がいい	n
person 2	thanks . so what are your hobbies ? i like to fish when not practicing or working .	魚や練習がない時は何が言いたいの ？	n
person 1	i am more or less a book nerd . a sci fi book nerd .	本を読むよりマシなんだ	n
person 2	nerds are cool in their own way . so are you are star wars or star trek fan ?	自分のやり方で自分の道を歩いてるのか星のファンなの ？	n
person 1	star trek . old school , you know . you ?	星の星だよ古い学校だ	n
person 2	oh yeah . my dad grew up on those and shared them with me .	父が育って私と共有してくれた	n
