# Supplementary material
Source: ML conference proceedings conference paper supplement (https://aclanthology.org/2022.eval4nlp-1.9)
Supplement: SupplementaryMaterial [file 1161.xlsx]

## Sheet: Sheet1
person	source	translation	evaluation: is this a good translation?
person 1	hello . what have you been up to today ?	こんにちは今日は何をしていましたか ？	y
person 2	hello there ! drinking tea mostly i have had about 10 cups	こんにちはお茶を 1 0 杯飲んでいたので	n
person 1	wow haha that is a lot ! i spent the morning reading	（ 哲希 ） そりゃよかった今朝読んでみたんだけど	n
person 2	really thanas great not me could never sit that long . . . ever go hiking ?	こんなに長く座ってくれて本当に感謝していないわ	n
person 1	no i am more of an indoors kinda gal . you ?	私はもうドアの外にはいないわ	n
person 2	no outdoorsy , love hiking , trekking all over , drove out to see the eclipse	ドアも愛情もなく朝食も見に行ったわ	n
person 1	that sounds amazing . i just read tons . my fave books are harry potter and got series	信じられない本も沢山あるし	n
person 2	nice ! bookworm ! jk i love both . my fave is the red woman episode	いいわね二人とも大好きな女性なの	n
person 1	great episode . but the books are even better . only show i really get into is walking dead	でも本は本当に歩くだけでいいのよ	n
person 2	also love it . red all over . what else are you doing to today ?	それに赤いわ今日は他に何をしてるの ？	n
person 1	not much , just thinking about making a nice big dinner tonight . what do you like to eat ?	今夜は素敵な夕食を作って何を食べたいの ？	n
person 2	carniferous , mainly red meat . trying to get the iron doctors orders	危険で危険な肉だ医者の命令を受けたい	n
