# Supplementary material
Source: ML conference proceedings conference paper supplement (https://aclanthology.org/2022.eval4nlp-1.9)
Supplement: SupplementaryMaterial [file 1161.xlsx]

## Sheet: Sheet1
person	source	translation	evaluation: is this a good translation?
person 1	hello . what have you been up to today ?	こんにちは。今日はどうしてた？	y
person 2	hello there ! drinking tea mostly i have had about 10 cups	こんにちは！ほとんどお茶ばかり飲んでる、10杯くらい飲んだよ。	y
person 1	wow haha that is a lot ! i spent the morning reading	わあ、はは、それは多いわね！私は午前中読書して過ごしたわ。	y
person 2	really thanas great not me could never sit that long . . . ever go hiking ?	そうなんだ、それはすごい、ぼくはだめだ、絶対そんなに長く座ってられない・・・。ハイキングは行ったりする？	y
person 1	no i am more of an indoors kinda gal . you ?	ううん、私はどちらかというとインドア女子。あなたは？	y
person 2	no outdoorsy , love hiking , trekking all over , drove out to see the eclipse	いや、アウトドア好きだ、ハイキングしたり、いろんなところをトレッキングしたりするのが大好きで、日食を見るのに車で出かけたよ。	y
person 1	that sounds amazing . i just read tons . my fave books are harry potter and got series	それは素敵。私、本を山ほど読んだところ。私のお気に入りはハリーポッターとゲーム・オブ・スローンズのシリーズ。	y
person 2	nice ! bookworm ! jk i love both . my fave is the red woman episode	いいね！本の虫！冗談だよ、僕は両方とも好き。僕が大好きなのは紅の女のエピソード。	y
person 1	great episode . but the books are even better . only show i really get into is walking dead	面白い話よね。でも、本の方がもっといいわよ。私が唯一はまってる番組はウオーキング・デッド。	y
person 2	also love it . red all over . what else are you doing to today ?	僕も好きだ。どこもかしこも血だらけ。今日は他に何をしてるの？	y
person 1	not much , just thinking about making a nice big dinner tonight . what do you like to eat ?	特に何も、豪華で美味しい夕飯を作ろうかと考えてたところ。好きな食べ物は何？	y
person 2	carniferous , mainly red meat . trying to get the iron doctors orders	肉が付いてるもの、主に赤身肉だね。医者の指示で鉄分を取るようにしてる。	y
