# Supplementary material
Source: ML conference proceedings conference paper supplement (https://aclanthology.org/2022.eval4nlp-1.9)
Supplement: SupplementaryMaterial [file 1167.xlsx]

## Sheet: Sheet1
person	source	translation	evaluation: is this a good translation?
person 1	hi , what are you up to today ?	今日はどうしたの ？	n
person 2	hi i just dropped my kids off at school	学校で子供を落としたの	n
person 1	fun stuff . i am about to explore some more of japan their food	楽しそうだ食べ物を調べたいんだ	n
person 2	oh wow are you on a trip there	おっと君はそこへ旅している	n
person 1	my remote programming job has me here for the month	私のリモコンプログラムは先月ここに私を連れてきた	n
person 2	cool waht things have you seen	あなたが見たものはクールだわ	n
person 1	alot of my computer screen unfortunately ! hoping to sight see more this week	先週はパソコンの画面がいっぱい見たかったわ	n
person 2	yeah you should have you eaten a lot of sushi	たくさん食べた方がいいわね	n
person 1	not a fan of sushi . . are you ?	寿司は好きじゃないよね ？	n
person 2	not that much do you have kids	子供がいるんでしょ ？	n
person 1	oh not yet . . i travel too much , have not been home in 2 years !	まだ旅もしてないし 2 年も家には帰ってないんだから ！	n
person 2	wow that is awesome where else have you een	他にも最高の場所があるのね	n
person 1	paris was my favorite . . what are your hobbies ?	私のお気に入りなのよ何が好きなの ？	n
person 2	i like to spend time with friends	友達と過ごすのが好きなの	y
person 1	how many kids do you have ?	子供は何人いるの ？	y
person 2	i have three all girls	3 人いる	n
