# Supplementary material
Source: ML conference proceedings conference paper supplement (https://aclanthology.org/2022.eval4nlp-1.9)
Supplement: SupplementaryMaterial [file 1167.xlsx]

## Sheet: Sheet1
person	source	translation	evaluation: is this a good translation?
person 1	hi , what are you up to today ?	こんにちは、今日は何してる？	y
person 2	hi i just dropped my kids off at school	こんにちは、ちょうど子供たちを学校へ送っていったところよ。	y
person 1	fun stuff . i am about to explore some more of japan their food	楽しいわね。私は日本と日本の食べ物をもっと調べようかなって思って。	n
person 2	oh wow are you on a trip there	へえ、あなた、日本を旅行中なの？	n
person 1	my remote programming job has me here for the month	遠隔プログラミングの仕事で一か月ここにいるの。	n
person 2	cool waht things have you seen	素敵、どんなものを見た？	n
person 1	alot of my computer screen unfortunately ! hoping to sight see more this week	残念ながら、自分のパソコンのスクリーンばかり！今週はもっと観光がしたいな。	n
person 2	yeah you should have you eaten a lot of sushi	ええ、そうしなきゃ。お寿司はたくさん食べた？	n
person 1	not a fan of sushi . . are you ?	寿司はあまり好きじゃないの・・・。あなたは？	y
person 2	not that much do you have kids	それほど好きじゃない。お子さんはいる？	y
person 1	oh not yet . . i travel too much , have not been home in 2 years !	ああ、まだよ・・・。たくさん旅行してて、２年間家に帰ってない！	y
person 2	wow that is awesome where else have you een	えー、それはすごいわ。他にはどこへ行った？	n
person 1	paris was my favorite . . what are your hobbies ?	お気に入りはパリだった・・・。あなたの趣味は何？	y
person 2	i like to spend time with friends	友達と過ごすのが好きよ。	y
person 1	how many kids do you have ?	お子さんは何人？	y
person 2	i have three all girls	三人、みんな女の子。	n
