# Supplementary material
Source: ML conference proceedings conference paper supplement (https://aclanthology.org/2022.eval4nlp-1.9)
Supplement: SupplementaryMaterial [file 1170.xlsx]

## Sheet: Sheet1
person	source	translation	evaluation: is this a good translation?
person 1	hi i start my new job as a baker tomorrow , i am excited to make cakes	やあ、僕、明日、パン屋として新しい仕事を始めるんだ、ケーキを焼くのはわくわくするよ。	y
person 2	awesome ! you are like jacob from fantastic beasts and where to find them !	すごいね！君、ファンタスティック・ビーストと魔法使いの旅のジェイコブみたい！	n
person 1	i have heard of the movie but never seen it	映画のことは聞いたことあるけど、観たことない。	y
person 2	omg , you should . it is . . . fantastic ! excuse the pun .	えーうっそー、観るべきだよ。本当に・・・ファンタスティックなんだ！駄洒落言ってごめん。	n
person 1	i will look it up online , i love the internet !	ネットで調べるよ、インターネットは大好き！	n
person 2	i use the internet a lot because i am in college part time .	僕はパートタイムの大学生だから、インターネットをしょっちゅう使うよ。	n
person 1	college is fun . any favorite foods ? being a vegetarian it is just vegetables for me .	大学は楽しいね。好きな食べ物はある？ベジタリアンなので、僕は野菜だけ。	y
person 2	i am obsessed with any kind of candy . i am vegetarian curious . any tips ?	いろんなお菓子にはまってる。ベジタリアンのこと知りたいな。何かアドバイスはある？	n
person 1	find a good website with multiple recipes because it can get boring .	たくさんレシピを載せてるいいホームページを見つけることだね、飽きることがあるから。	n
person 2	that is good advice . variety is the spice of life , right ?	いいアドバイスだ。変化は人生のスパイス、ってことだね。	n
person 1	that is what they day . do you like music ?	そういうこと。音楽は好き？	n
person 2	yes , i do . i recently listened to the rolling stones . what about you ?	うん、好きだよ。最近、ローリングストーンを聴いた。君は？	y
person 1	i like country music , i grew up on it .	僕はカントリー音楽が好き、それを聞いて育ったんだ。	y
person 2	my family lives in the country , so country music is in my blood .	僕の家族は田舎に住んでるから、僕にはカントリー音楽好きの血が流れてる。	y
person 1	oh , do you live in the city now then ?	へえ、それで今は街に住んでるの？	n
person 2	yeah , i moved to new york three years ago .	うん、３年前ニューヨークへ引っ越してきた。	n
