# Supplementary material
Source: ML conference proceedings conference paper supplement (https://aclanthology.org/2022.eval4nlp-1.9)
Supplement: SupplementaryMaterial [file 1170.xlsx]

## Sheet: Sheet1
person	source	translation	evaluation: is this a good translation?
person 1	hi i start my new job as a baker tomorrow , i am excited to make cakes	明日は私の新しい仕事を始めまして喜んでケーキを作ってくれて嬉しいわ	n
person 2	awesome ! you are like jacob from fantastic beasts and where to find them !	君は最高の獣だジェイコブから見つけられる場所から来てくれて嬉しいよ	n
person 1	i have heard of the movie but never seen it	映画の話は聞いたことがありますが見たことがありませんでした	n
person 2	omg , you should . it is . . . fantastic ! excuse the pun .	あなたの方がいいわねそれはいいわごめんなさい	n
person 1	i will look it up online , i love the internet !	ネットを見てくるネットは大好きだ ！	n
person 2	i use the internet a lot because i am in college part time .	ネットは大学時代から使ってるから	n
person 1	college is fun . any favorite foods ? being a vegetarian it is just vegetables for me .	大学は楽しいし好きなベジタリアンはベジタリアンなんだ	n
person 2	i am obsessed with any kind of candy . i am vegetarian curious . any tips ?	キャンディーに執着してるのベジタリアンなのチップはある ？	n
person 1	find a good website with multiple recipes because it can get boring .	多くの提供者とサイトを見つけて退屈になるから	n
person 2	that is good advice . variety is the spice of life , right ?	それは良いアドバイスだスパイスの生活はスパイスの価値だな ？	n
person 1	that is what they day . do you like music ?	それが音楽が好きなのか ？	n
person 2	yes , i do . i recently listened to the rolling stones . what about you ?	最近石の音を聞いたわあなたは ？	n
person 1	i like country music , i grew up on it .	音楽が好きなの私は成長したの	n
person 2	my family lives in the country , so country music is in my blood .	俺の家族は国で生きているだから俺の血の中に音楽がある	n
person 1	oh , do you live in the city now then ?	じゃあ今は街に住んでるの ？	y
person 2	yeah , i moved to new york three years ago .	ああ ３ 年前 N Y に引っ越した	y
