# Supplementary material
Source: ML conference proceedings conference paper supplement (https://aclanthology.org/2022.eval4nlp-1.9)
Supplement: SupplementaryMaterial [file 1172.xlsx]

## Sheet: Sheet1
person	source	translation	evaluation: is this a good translation?
person 1	hi how are you doing ?	こんにちは、元気？	y
person 2	i am just wonderful how about yourself ?	とても元気よ、あなたは？	y
person 1	i am good thanks for asking	元気です、ありがとう。	y
person 2	what do you like to do for fun ?	どんなことをするのが好き？	y
person 1	i love to play sports alot	いろんなスポーツをするのが好きです。	y
person 2	your so lucky , i am very old and not as spry as i once was .	とてもうらやましい、私は高齢だから、以前ほど活発に動けないのよ。	n
person 1	how old are you lol ?	おいくつなんですか（笑）？	y
person 2	oh i stopped counting after the 5th grandkid	あら、五人目の孫が生まれてから数えるのはやめたわ。	n
person 1	you must love spending time with them	きっとお孫さんと過ごす時間がお好きなんでしょうね。	y
person 2	well they live out in the suburbs so its hard to leave the city	ええと、孫たちは郊外に住んでいるから、街を出るのは難しいの。	y
person 1	what do you do for a living ?	お仕事は何ですか？	y
person 2	oh my job mostly is to make sure my neighbor does not lose her cat	ああ、私の仕事はたいていお隣さんの猫がいなくならないようにすることね。	y
person 1	do you like to garden at all ?	庭仕事はお好きですか？	y
person 2	i dabble here and there , but my charlie usually digs everything up .	あちこちいじるんだけど、うちのチャーリーがいつも全部掘り起こしちゃう。	n
