# Supplementary material
Source: ML conference proceedings conference paper supplement (https://aclanthology.org/2022.eval4nlp-1.9)
Supplement: SupplementaryMaterial [file 1172.xlsx]

## Sheet: Sheet1
person	source	translation	evaluation: is this a good translation?
person 1	hi how are you doing ?	お元気ですか ？	n
person 2	i am just wonderful how about yourself ?	私はただあなた自身はどう ？	n
person 1	i am good thanks for asking	頼んでくれてありがとう	n
person 2	what do you like to do for fun ?	楽しいことをしたいの ？	n
person 1	i love to play sports alot	スポーツをやりたい	n
person 2	your so lucky , i am very old and not as spry as i once was .	幸運なことに私は年を取ったこともなかった	n
person 1	how old are you lol ?	君はいくつだ ？	y
person 2	oh i stopped counting after the 5th grandkid	♪ O h, I stopped after t h e 5 歳の子供の頃から数えていたの	n
person 1	you must love spending time with them	あなたは彼らと一緒に過ごす時間を楽しんでいなければなりません	n
person 2	well they live out in the suburbs so its hard to leave the city	彼らはよく生きて街を離れることができます彼らは非常に困難です	n
person 1	what do you do for a living ?	家で何をしてるの ？	n
person 2	oh my job mostly is to make sure my neighbor does not lose her cat	近所の人が猫を失ったりしないことを確認しないと	n
person 1	do you like to garden at all ?	庭は好きか ？	n
person 2	i dabble here and there , but my charlie usually digs everything up .	私はここでうんざりだけどチャーリーはいつも上にいる	n
