# Supplementary material
Source: ML conference proceedings conference paper supplement (https://aclanthology.org/2022.eval4nlp-1.9)
Supplement: SupplementaryMaterial [file 1181.xlsx]

## Sheet: Sheet1
person	source	translation	evaluation: is this a good translation?
person 1	hello , how has your day been ?	こんにちは、今日はどうだった ？	n
person 2	i am still tired from performing at the theater last night . how is yours ?	昨夜の劇場ではまだ疲れてるわあなたは ？	n
person 1	good , just about to finish this book .	いいわ本を完成させるためにね	n
person 2	what is the book about	本のことだけど	n
person 1	it is a biography . what did you preform last night ? that sounds interesting .	昨夜のメソポタミアで何を見た ？	n
person 2	stand up comedy . i have also had a few roles in tv series	テレビでも見たか ？	n
person 1	oh that is awesome ! tell me more about yourself	あなたのこともっと話して	n
person 2	i grew up in a small town and have always wanted to be a comedian .	小さい町で育っていつもコメディアンになりたがっていた	y
person 1	interesting . i wrote a biography about a famous actor with a similar background as yours .	面白いね君と同じ有名な俳優を書いたんだ	n
person 2	very interesting . i wish i had a cuba libre right now .	興味深いね今はフラブシャムが欲しかった	n
person 1	do you like to drink ?	飲むかい ？	y
person 2	yes , occasionally . i am not a big drinker . do you ?	ああ時々俺は大酒飲みじゃないんだ	n
person 1	not really . i do not go out much . can i tell you a secret ?	あまり外に出るな秘密を教えようか ？	n
person 2	of course . i am listening .	もちろん聞いてるわ	n
person 1	well , i am 24 and i have never actually gone on a date .	2 4 歳なのデートは初めてよ	n
person 2	wow . what is stopping you ?	何を止めるの ？	n
