# Supplementary material
Source: ML conference proceedings conference paper supplement (https://aclanthology.org/2022.eval4nlp-1.9)
Supplement: SupplementaryMaterial [file 1181.xlsx]

## Sheet: Sheet1
person	source	translation	evaluation: is this a good translation?
person 1	hello , how has your day been ?	こんにちは、どんな一日だった？	y
person 2	i am still tired from performing at the theater last night . how is yours ?	昨夜、舞台に出演した疲れがまだ残ってる。君はどう？	y
person 1	good , just about to finish this book .	いい日だったよ、ちょうどこの本を書き終えたところだ。	n
person 2	what is the book about	どんな内容の本？	y
person 1	it is a biography . what did you preform last night ? that sounds interesting .	伝記だよ。昨夜、何を演じたの？面白そうだね。	n
person 2	stand up comedy . i have also had a few roles in tv series	漫才だよ。テレビの連続番組で役を２，３やったこともある。	y
person 1	oh that is awesome ! tell me more about yourself	へえ、それはすごい！君のこともっと教えて。	y
person 2	i grew up in a small town and have always wanted to be a comedian .	小さい街で育って、ずっとコメディアンになりたかった。	y
person 1	interesting . i wrote a biography about a famous actor with a similar background as yours .	興味深いな。僕ね、君とよく似た経歴を持つ有名な俳優の伝記を書いたんだ。	y
person 2	very interesting . i wish i had a cuba libre right now .	すごく面白いね。今、キューバ・リブレがあったらなあ。	y
person 1	do you like to drink ?	お酒飲むの好き？	y
person 2	yes , occasionally . i am not a big drinker . do you ?	うん、ときどきね。大酒飲みじゃないよ。君は？	y
person 1	not really . i do not go out much . can i tell you a secret ?	それほど飲まない。あまり外出しないんだ。秘密を言っちゃっていいかな？	y
person 2	of course . i am listening .	もちろん。聞くよ。	y
person 1	well , i am 24 and i have never actually gone on a date .	ええと、僕は２４才で、実は一度もデートしたことがないんだ。	y
person 2	wow . what is stopping you ?	ええっ。なんでしないの？	y
