# Supplementary material
Source: ML conference proceedings conference paper supplement (https://aclanthology.org/2022.eval4nlp-1.9)
Supplement: SupplementaryMaterial [file 1185.xlsx]

## Sheet: Sheet1
person	source	translation	evaluation: is this a good translation?
person 1	hello , how are you tonight ?	こんにちは、元気？	y
person 2	wonderful , just got home from my 7 mile run	とても元気よ、ちょうど日課の７マイルを走って帰宅したところ。	y
person 1	i can only go three , i surf a lot though .	私は３マイルしか走れない、サーフィンはしょっちゅうするけど。	y
person 2	i run daily , i usually can only do 3 if i belt out songs lol	私、毎日走るよ、大声で歌ったら、たいてい３マイルしか走れないけどね（笑）	y
person 1	lol . my brothers have that habit as well .	（笑）私の兄弟もそういう癖がある。	y
person 2	in school i did track and field , and won trophies , did you do sports ?	私、学校で陸上競技をやってて、いくつかトロフィーをもらった、あなたはスポーツはやってた？	y
person 1	i was a cheer leader and on my schools surfing and gymnastics teams .	私はチアリーダーをやってて、学校のサーフィンと体操のチームに入ってた。	y
person 2	i too did gymnastics . but my passion is with running .	私も体操をやってたよ。でも私の情熱は走ることよ。	y
person 1	my oldest sister was a track star , i knew better than to follow in her footsteps .	私の一番上の姉がトラック競技で活躍した選手だったけど、姉と同じ道を行かない方がいいってことは分かってた。	y
person 2	it is ok to follow your own path !	自分の道を行けばいいのよ！	y
person 1	i have a lot of siblings and i chose sports none of them did .	きょうだいが多くて、きょうだいの誰もやってないスポーツを選んだの。	y
person 2	track is a sport ! do you have a favorite hobby ?	トラック競技はスポーツよ！好きな趣味はある？	n
person 1	surfing is my life and my hobby .	サーフィンは私の人生、そして趣味よ。	y
person 2	awesome , i think my hobby is cooking . creating fancy meals is a great accomplishment .	素晴らしいわ、私の趣味は料理ね。豪華な食事を作ることはすごい達成感よ。	n
