# Supplementary material
Source: ML conference proceedings conference paper supplement (https://aclanthology.org/2022.eval4nlp-1.9)
Supplement: SupplementaryMaterial [file 1185.xlsx]

## Sheet: Sheet1
person	source	translation	evaluation: is this a good translation?
person 1	hello , how are you tonight ?	今晩はどうだった ？	n
person 2	wonderful , just got home from my 7 mile run	７ マイルから家に帰ってきた	n
person 1	i can only go three , i surf a lot though .	三人だけで行くことができるが	n
person 2	i run daily , i usually can only do 3 if i belt out songs lol	毎日 3 曲しかできないんだ	n
person 1	lol . my brothers have that habit as well .	弟も同じ癖を持っている	n
person 2	in school i did track and field , and won trophies , did you do sports ?	学校で見つけてスポーツチームを勝ったのか ？	n
person 1	i was a cheer leader and on my schools surfing and gymnastics teams .	私は大学とスポーツチームのリーダーだった	n
person 2	i too did gymnastics . but my passion is with running .	私もスポーツ選手だったでも情熱は逃げてる	n
person 1	my oldest sister was a track star , i knew better than to follow in her footsteps .	私の姉は古いスターだった彼女の足跡についた方がいいと思ってた	n
person 2	it is ok to follow your own path !	自分の道を歩むのはいいことだ ！	y
person 1	i have a lot of siblings and i chose sports none of them did .	兄弟とスポーツを選んだ者はいない	n
person 2	track is a sport ! do you have a favorite hobby ?	スポーツは好きな趣味があるの ？	n
person 1	surfing is my life and my hobby .	私の人生と趣味なの	n
person 2	awesome , i think my hobby is cooking . creating fancy meals is a great accomplishment .	趣味は料理よ料理は素晴らしいものよ	n
