# Supplementary material
Source: ML conference proceedings conference paper supplement (https://aclanthology.org/2022.eval4nlp-1.9)
Supplement: SupplementaryMaterial [file 1186.xlsx]

## Sheet: Sheet1
person	source	translation	evaluation: is this a good translation?
person 1	hello , how are you doing today ?	こんにちは、元気？	y
person 2	i am doing great ! just hanging out with my cat , how are you ?	とても元気！ちょうど猫と遊んでたところ、元気？	y
person 1	oh that is nice . i got a cat , too . what kind of cat do you have ?	ああ、それは素敵。私も猫を飼ってる。どんな猫を飼ってるの？	y
person 2	domestic short haired . do you have any other pets ?	短毛の雑種猫よ。他に何かペット飼ってる？	n
person 1	i also have a german shepard as my other pet	他のペットではジャーマンシェパードも飼ってる。	y
person 2	nice ! what do you do for fun ? i enjoy watching movies .	いいわね！何をするのが楽しみ？私は映画を観るのが大好き。	y
person 1	i like to sew and read books	私は裁縫と読書が好き。	y
person 2	sewing is hard ! movies are much less work ! what about music ?	裁縫はむずかしいよね！映画の方がずっと楽！音楽はどう？	y
person 1	i listen to all types of music . except country music .	いろんな音楽を聴くわ。カントリー音楽以外。	y
person 2	i really enjoy folk metal , it is such an interesting fusion .	私、フォークメタルがすごく好き、とても面白い融合よ。	y
person 1	what do you do for work ?	何のお仕事をしてるの？	y
person 2	i own a restaurant that specializes in tacos .	タコス専門店を経営してる。	y
person 1	i work at a cafe and wait tables . i like it .	私はカフェでウェイトレスをしてる。気に入ってるわ。	y
person 2	well it was lovely chatting with you !	ええと、お話できて楽しかったわ！	y
