# Supplementary material
Source: ML conference proceedings conference paper supplement (https://aclanthology.org/2022.eval4nlp-1.9)
Supplement: SupplementaryMaterial [file 1186.xlsx]

## Sheet: Sheet1
person	source	translation	evaluation: is this a good translation?
person 1	hello , how are you doing today ?	こんにちは今日はどうですか ？	y
person 2	i am doing great ! just hanging out with my cat , how are you ?	私は元気よ猫と一緒にいるだけよ元気 ？	y
person 1	oh that is nice . i got a cat , too . what kind of cat do you have ?	よかった猫もいるよどんな猫がいるんだ ？	n
person 2	domestic short haired . do you have any other pets ?	短期間でペットは他には ？	n
person 1	i also have a german shepard as my other pet	And I 'v e got a german, too pet like m y pet	n
person 2	nice ! what do you do for fun ? i enjoy watching movies .	Good, what d o you doing for a enjoy for a fun movie.	n
person 1	i like to sew and read books	本と本を読んでみたい	n
person 2	sewing is hard ! movies are much less work ! what about music ?	映画は大変なんだ音楽以外はどうだ ？	n
person 1	i listen to all types of music . except country music .	音楽以外の国の音楽が聴こえるんだよ	n
person 2	i really enjoy folk metal , it is such an interesting fusion .	私は本当に金属人が楽しい、それは非常に興味深い輸血です。	n
person 1	what do you do for work ?	仕事は何をしてるんだ ？	n
person 2	i own a restaurant that specializes in tacos .	俺はタコスの専門店のオーナーだ	n
person 1	i work at a cafe and wait tables . i like it .	私はカフェで働いて待つのが好きなの	n
person 2	well it was lovely chatting with you !	あなたと話せて良かったわ	n
