# Supplementary material
Source: ML conference proceedings conference paper supplement (https://aclanthology.org/2022.eval4nlp-1.9)
Supplement: SupplementaryMaterial [file 1190.xlsx]

## Sheet: Sheet1
person	source	translation	evaluation: is this a good translation?
person 1	hello there ! how are you doing today ?	こんにちは今日はどうですか ？	y
person 2	hi i am good how are you	元気ですか ？	n
person 1	fine thank you . what gender are you if you do not mind me asking ?	ありがとう聞いてもいいかしら ？	n
person 2	male why do you ask me ?	男性がなぜ私に聞くのですか ？	n
person 1	i am a woman . think of becoming a man	僕は女性だ男になることを考えて	n
person 2	wow tell me more about that i am genuinely interested	私が本当に興味を持っていることをもっと話してくれないか ？	y
person 1	ust feel like i do not fit in as a man	I feel like I 'm not fit i n a man, I don' t fit i n a man.	n
person 2	i think whatever makes you happy should the ppl close to you happy	I think what y o u make you b e happy t o b e happy t o b e happy t o you.	n
person 1	but i am just so unsure . . .	でも確かじゃないわ	n
person 2	what is making you feel so unsure ?	何を感じてるの ？	n
person 1	i cant tell which gender i am more attracted to	"私はもっとセクシーになって "	n
person 2	but why would you need to change yourself for someone your attracted to ?	" でもなぜ自分を変えないといけないの ？"	n
