# Supplementary material
Source: ML conference proceedings conference paper supplement (https://aclanthology.org/2022.eval4nlp-1.9)
Supplement: SupplementaryMaterial [file 1190.xlsx]

## Sheet: Sheet1
person	source	translation	evaluation: is this a good translation?
person 1	hello there ! how are you doing today ?	こんにちは！元気？	y
person 2	hi i am good how are you	やあ、元気だよ、君は元気？	y
person 1	fine thank you . what gender are you if you do not mind me asking ?	元気よ、ありがとう。あなたの性別、お聞きしてもいいかしら？	y
person 2	male why do you ask me ?	男だよ、なぜ訊くの？	y
person 1	i am a woman . think of becoming a man	私は女。男になることを考えてる。	y
person 2	wow tell me more about that i am genuinely interested	へえ、そのことについてもっと教えて、興味津々だ。	y
person 1	ust feel like i do not fit in as a man	私、女として適応してないように感じてた。	n
person 2	i think whatever makes you happy should the ppl close to you happy	君を幸せにすることなら何であれ、君の親しい人たちを幸せにするはずだと思う。	n
person 1	but i am just so unsure . . .	でも、私,とても迷ってて・・・。	n
person 2	what is making you feel so unsure ?	どうしてそんなに迷ってるの？	n
person 1	i cant tell which gender i am more attracted to	どっちの性別の方に魅力を感じるのか自分でもわからない。	y
person 2	but why would you need to change yourself for someone your attracted to ?	でも、どうして心惹かれる人のために自分を変える必要があるの？	n
