# Supplementary material
Source: ML conference proceedings conference paper supplement (https://aclanthology.org/2022.eval4nlp-1.9)
Supplement: SupplementaryMaterial [file 1191.xlsx]

## Sheet: Sheet1
person	source	translation	evaluation: is this a good translation?
person 1	hello how are you and how is your day going ?	こんにちは、元気？今日の調子はどう？	y
person 2	hi ! i am good , just got home from a violin concert ! you ?	こんにちは！元気だよ、ちょうどバイオリンのコンサートから帰ってきたところ！君は？	y
person 1	good to hear , i am watching tv . so what do you do for fun ?	よかったね、僕はテレビを観てるとこ。で、君の趣味は？	y
person 2	i like music , play the violin , and like to watch my koi pond . you ?	音楽が好き、バイオリンを弾くよ、それとうちの鯉の池を眺めるのが好き。君は？	y
person 1	i like to cook . especially breakfast on sundays . so you like fish ?	料理が好き。特に日曜日の朝食。じゃあ、君は魚が好きなの？	y
person 2	breakfast food is good ! i do , my favorite fish is spot . do you have pets ?	朝食はいいね！好きだよ、僕の大好きな魚はスポット。君、ペットは飼ってる？	n
person 1	yes yummy ! ! ! i prefer pancakes . i have 2 dogs . what do you eat ?	うん、美味しいよね！！！僕はパンケーキの方が好き。犬を二匹飼ってる。君は何を食べるの？	y
person 2	i eat a lot of vegetables . i just started to grow a garden .	野菜をたくさん食べる。ちょうど家庭菜園を始めたところ。	n
person 1	nice ! i like vegetables too ! ! what kind do you grow ?	素敵だね！僕も野菜は好き！！どんなものを育ててるの？	y
person 2	i have carrots , cabbage , lettuce , tomatoes just to start . what kind of music do you like ?	手始めに、人参、キャベツ、レタスにトマト。どんな音楽が好きなの？	y
person 1	i listen to pop and r and b	僕が聴くのはポップスとＲ＆Ｂ。	y
person 2	imagine dragons is the main group i listen to .	僕が主に聴くグループは、イマジン・ドラゴンズだ。	y
person 1	okay i have never heard of them . what genre is it ?	そうか、僕は聞いたことがない。どんなジャンルなの？	y
person 2	kind of pop and alternative mixed together	ポップスとオルタナティブを合わせたみたいなもの。	y
person 1	oh cool ! ! i really like music and singing	へえ、かっこいい！！僕は本当に音楽と歌が好きなんだ。	n
person 2	i do too . i am a musician .	僕もだよ。僕はミュージシャンなんだ。	y
