# Supplementary material
Source: ML conference proceedings conference paper supplement (https://aclanthology.org/2022.eval4nlp-1.9)
Supplement: SupplementaryMaterial [file 1191.xlsx]

## Sheet: Sheet1
person	source	translation	evaluation: is this a good translation?
person 1	hello how are you and how is your day going ?	こんにちはこんにちは今日はどうですか ？	n
person 2	hi ! i am good , just got home from a violin concert ! you ?	僕は大丈夫だバイオリンコンサートから帰ってきたんだよ君は ？	y
person 1	good to hear , i am watching tv . so what do you do for fun ?	テレビを見てるから楽しんでるの ？	n
person 2	i like music , play the violin , and like to watch my koi pond . you ?	私は音楽が好きでバイオリンを弾くのが好きなのあなたは ？	n
person 1	i like to cook . especially breakfast on sundays . so you like fish ?	特に日食は好きだから魚は好き ？	n
person 2	breakfast food is good ! i do , my favorite fish is spot . do you have pets ?	朝食はうまいよ魚は好きだペットはいるか ？	n
person 1	yes yummy ! ! ! i prefer pancakes . i have 2 dogs . what do you eat ?	おいしいわケーキが欲しいの何を食べてるの ？	n
person 2	i eat a lot of vegetables . i just started to grow a garden .	野菜をたくさん食べた庭に育ったんだ	n
person 1	nice ! i like vegetables too ! ! what kind do you grow ?	私も野菜が好きなの何年育ったの ？	n
person 2	i have carrots , cabbage , lettuce , tomatoes just to start . what kind of music do you like ?	私はニンジンとクラップとトマトを食べ始めたのよどんな音楽が好きなの ？	n
person 1	i listen to pop and r and b	トイレとトイレの話を聞きたいわ	n
person 2	imagine dragons is the main group i listen to .	ドラゴンは一番のグループだと思っている	n
person 1	okay i have never heard of them . what genre is it ?	聞いたことがないわ何が言いたいの ？	n
person 2	kind of pop and alternative mixed together	一緒に音楽や歌が好きなんだ	n
person 1	oh cool ! ! i really like music and singing	音楽と歌が好きなんだ	n
person 2	i do too . i am a musician .	私もよミュージシャンなの	n
