# Supplementary material
Source: ML conference proceedings conference paper supplement (https://aclanthology.org/2022.eval4nlp-1.9)
Supplement: SupplementaryMaterial [file 1193.xlsx]

## Sheet: Sheet1
person	source	translation	evaluation: is this a good translation?
person 1	hi i am dave hows it going	こんにちは、私はそれを実行しています。	n
person 2	hello i am cory . i am great , how are you ?	こんにちは、私は元気ですか ？	n
person 1	i am good , went swimming today	今日は泳いでいった	n
person 2	i love swimming . do you like to listen to music while you swim ?	泳ぐのが好きなんだ音楽を聴きたいか ？	n
person 1	sometimes but it usually does not work very well	時々うまくいかないんだ	n
person 2	what other things do you enjoy doing in your free time , dave ?	自由の時間に何を楽しんでるんだ ？	n
person 1	most of my free time goes to my daughter	私の最も自由な時は娘の所へ行くこと	y
person 2	i have a daughter as well . we go to festivals in our town together .	俺も娘がいるんだ一緒に町に行こうぜ	n
person 1	mines is to little to do that just yet haha	今でもそうしないといけないんだよ	n
person 2	awe ! how old is she ?	彼女いくつだ ？	y
person 1	she is almost 8 months	彼女は ８ ヶ月後に働いている	n
person 2	so sweet ! i work from home , so i get to spend a lot of time with mine !	楽しい家から帰ってきたから私の家と過ごすのに時間がかかったのよ ！	n
person 1	same , so whats your favorite food	あなたの好きな料理が好きなのね	n
person 2	stuffed green bell peppers packed full of beef and cheese ! how about you ?	緑のパンとチーズを全部詰め込んで、あなたはどうですか ？	n
