# Supplementary material
Source: ML conference proceedings conference paper supplement (https://aclanthology.org/2022.eval4nlp-1.9)
Supplement: SupplementaryMaterial [file 1193.xlsx]

## Sheet: Sheet1
person	source	translation	evaluation: is this a good translation?
person 1	hi i am dave hows it going	やあ、僕はデイブ、調子はどう？	y
person 2	hello i am cory . i am great , how are you ?	こんにちは、僕はコーリー。とても元気だよ、君は元気？	y
person 1	i am good , went swimming today	元気だ、今日泳ぎに行った。	y
person 2	i love swimming . do you like to listen to music while you swim ?	僕、泳ぐの大好き。泳いでる間、音楽聞くのは好き？	y
person 1	sometimes but it usually does not work very well	ときどきね、でも大抵あまりうまくいかない。	y
person 2	what other things do you enjoy doing in your free time , dave ?	暇な時間には他に何をするのが好きなの、デイブ？	y
person 1	most of my free time goes to my daughter	暇な時間のほとんどは娘と過ごすよ。	y
person 2	i have a daughter as well . we go to festivals in our town together .	僕にも娘がいる。住んでる街の祭りにいっしょに行くんだ。	y
person 1	mines is to little to do that just yet haha	僕の娘はそれにはまだちょっと早すぎるな、はは。	n
person 2	awe ! how old is she ?	そうなんだ！娘さんは何歳？	y
person 1	she is almost 8 months	もう少しで８カ月。	y
person 2	so sweet ! i work from home , so i get to spend a lot of time with mine !	それはかわいいね！僕は在宅勤務だから、かなりの時間を娘と過ごせる。	y
person 1	same , so whats your favorite food	同じだ、で、君の好きな食べ物は何？	y
person 2	stuffed green bell peppers packed full of beef and cheese ! how about you ?	牛肉とチーズがたっぷりの肉詰めピーマン！君は？	y
