# Supplementary material
Source: ML conference proceedings conference paper supplement (https://aclanthology.org/2022.eval4nlp-1.9)
Supplement: SupplementaryMaterial [file 1194.xlsx]

## Sheet: Sheet1
person	source	translation	evaluation: is this a good translation?
person 1	hello how are you today	こんにちは、元気？	y
person 2	i am fine i guess	元気だよ、たぶんね。	y
person 1	do you like to travel	旅行は好き？	y
person 2	all day long every day	一日中、毎日してる。	y
person 1	i travel all the time for work .	僕は仕事でいつも旅行してる。	y
person 2	really , how is that ?	本当、それはどうして？	n
person 1	i run my parents travel agency	両親の旅行会社を経営してる。	n
person 2	how much fun is that ?	仕事は面白い？	y
person 1	i love it . have you ever left the country	気に入ってるよ。国を出たことある？	y
person 2	can i get a ticket to canada ?	カナダ行きのチケットは取れるかな？	y
person 1	you can but jamaica is one of the best places to go	できるよ、でもジャマイカは訪れるには最高の場所の一つだ。	y
person 2	i would love to go there	そこへ行きたいな。	y
person 1	i go a lot since it is my favorite . what do you do for a living	大好きだから、僕はしょっちゅう行く。仕事は何をしてるの？	y
person 2	i dance for a living	ダンスで生計を立ててる。	y
person 1	that sounds fun . what kind of dancing do you do	楽しそうだね。どんなダンスをするの？	y
person 2	on tables on the weekends	週末はウェイターをしてるんだ。	n
