# Supplementary material
Source: ML conference proceedings conference paper supplement (https://aclanthology.org/2022.eval4nlp-1.9)
Supplement: SupplementaryMaterial [file 1194.xlsx]

## Sheet: Sheet1
person	source	translation	evaluation: is this a good translation?
person 1	hello how are you today	今日は元気か ？	n
person 2	i am fine i guess	元気だと思うけど	y
person 1	do you like to travel	毎日旅行が好きなの ？	n
person 2	all day long every day	毎日	n
person 1	i travel all the time for work .	仕事のために旅をしていた	n
person 2	really , how is that ?	本当にそうなの ？	n
person 1	i run my parents travel agency	私は両親の出張会社を経営してるの	n
person 2	how much fun is that ?	どのくらい楽しんでる ？	y
person 1	i love it . have you ever left the country	愛してるわあなたは国を出たことがあるの ？	y
person 2	can i get a ticket to canada ?	オーダまで送ってもいい ？	n
person 1	you can but jamaica is one of the best places to go	でもジャマイカは最高の場所なんだ	n
person 2	i would love to go there	私はそこに行きたいわ	y
person 1	i go a lot since it is my favorite . what do you do for a living	私はそれが好きなので、それが私の好きなものですから、あなたは何をするつもりですか ？	n
person 2	i dance for a living	私は人生のためにダンスをしています。	n
person 1	that sounds fun . what kind of dancing do you do	楽しそうだわどんなダンスをするの ？	y
person 2	on tables on the weekends	週末はテーブルに座って	n
