# Supplementary material
Source: ML conference proceedings conference paper supplement (https://aclanthology.org/2022.eval4nlp-1.9)
Supplement: SupplementaryMaterial [file 1198.xlsx]

## Sheet: Sheet1
person	source	translation	evaluation: is this a good translation?
person 1	hello there person whom i have never met	こんにちは、初めて会う誰かさん。	n
person 2	hey . how are you ?	こんにちは。元気？	y
person 1	i am doing fine . how about yourself ?	元気だよ。君は？	y
person 2	doing great , just finished a game of volleyball this morning .	とても元気、今朝、ちょうどバレーボールの試合を終えたところ。	y
person 1	that sounds fun . i prefer cycling . do you like music ?	楽しそうだね。僕はサイクリングの方が好きだけど。音楽は好き？	y
person 2	as background noise when i am doing my nails .	ネイルをするときにかける。	n
person 1	nice . i jam out to the pearl jam .	いいね。僕はパール・ジャムに合わせて思いっきり演奏する。	y
person 2	haha , i like what you did there . do you like hiking too , or just cycling ?	はは、それ、いいね。あなたもハイキングは好き？それともサイクリングだけ？	y
person 1	nah , i cycle at night . its hard to hike at night .	いや、僕は夜、自転車に乗るんだ。夜にハイキングは難しいよ。	y
person 2	yes , that would be a little difficult . i am taking a 6 mile hike tomorrow .	そうね、ちょっと難しいよね。私、明日、６マイルハイキングするの。	y
person 1	wow . that is a far hike . we do not have many good hiking spots in boston	わあ。遠くまで歩くんだね。ボストンにはハイキングするのにいい場所があまりないんだよな。	y
person 2	oh , but you do have the trail of freedom . that is a great stroll .	あら、でもフリーダムトレイルがあるよね。散歩には素晴らしいじゃない。	y
person 1	well it was nice talking to you	ええと、話ができて楽しかったよ。	y
person 2	you too , enjoy your cycling and your pearl .	私も、サイクリングとパールジャム、楽しんでね。	n
