# Supplementary material
Source: ML conference proceedings conference paper supplement (https://aclanthology.org/2022.eval4nlp-1.9)
Supplement: SupplementaryMaterial [file 1198.xlsx]

## Sheet: Sheet1
person	source	translation	evaluation: is this a good translation?
person 1	hello there person whom i have never met	今まで会ったことがない人がいるの	n
person 2	hey . how are you ?	元気か ？	n
person 1	i am doing fine . how about yourself ?	俺は大丈夫だお前はどうだ ？	y
person 2	doing great , just finished a game of volleyball this morning .	今朝の試合は終わったんだ	n
person 1	that sounds fun . i prefer cycling . do you like music ?	楽しそうだね音楽は好きかい ？	n
person 2	as background noise when i am doing my nails .	爪を切ってる時の騒音のように聞こえる	n
person 1	nice . i jam out to the pearl jam .	よかったパールにジャムを入れたんだ	n
person 2	haha , i like what you did there . do you like hiking too , or just cycling ?	そこで何をしたか好きなんだね ？ それともクジャク王が好きなだけ ？	n
person 1	nah , i cycle at night . its hard to hike at night .	夜は歩くのが大変なの	n
person 2	yes , that would be a little difficult . i am taking a 6 mile hike tomorrow .	ええそれは難しいわ明日の朝 ６ マイル先まで歩いてるの	n
person 1	wow . that is a far hike . we do not have many good hiking spots in boston	遠くへ歩くのは良い王が沢山いるわ	n
person 2	oh , but you do have the trail of freedom . that is a great stroll .	自由の道はあるけど散歩はいいわね	n
person 1	well it was nice talking to you	話せて良かったわ	y
person 2	you too , enjoy your cycling and your pearl .	君も楽しんでパールを楽しんでくれ	n
