# Supplementary material
Source: ML conference proceedings conference paper supplement (https://aclanthology.org/2022.eval4nlp-1.9)
Supplement: SupplementaryMaterial [file 1199.xlsx]

## Sheet: Sheet1
person	source	translation	evaluation: is this a good translation?
person 1	what do you like to do ?	どうしたい ？	y
person 2	i love art , i teach at a school	美術学校で教えてあげる	n
person 1	i love art too which is why i like museums so much .	だから映画が大好きなんだ	n
person 2	i used to go to museums with my girlfriend	彼女と博物館に行ったことがあった	n
person 1	there are a lot of museums here in new york city , luckily .	新しい町にはたくさんの博物館がある運が良かった	n
person 2	yeah ! the museum of modern art is there right ?	現代美術博物館はそこにあるのか ？	n
person 1	yes ! my wife and i love going there with our family .	そうだ妻と家族と一緒に行くのが好きだ	y
person 2	i have seen some cool stuff online about temporary installations	I 'v e seen some cool sort o f actually a cool about a temporary research.	n
person 1	i just wrote an article about that recently !	I wrote a book about that recently about that recently!	n
person 2	really ? ! what is your work ?	仕事は何だ ？	n
person 1	i write for a living .	俺は生きるために書いたんだ	n
person 2	for what publication ? or what book ?	どんな出版社のために ？	n
person 1	children stories , inspired by my nieces and nephews 10 of them !	私の子供たちの物語に感動して 1 0 人の甥になったのよ ！	n
person 2	wow , nice i love little kids , they are the best artists	いい子たちだわ最高の芸術家よ	n
person 1	yes , they love to visit us in nyc because there is so much to do .	ええ彼らは私たちを歓迎するのが好きなのそれが仕事なのよ	n
person 2	i heard there is more than 25000 restaurants there	私は聞いたことがありますレストランで 2 5 0 0 0 0 以上以上のレストランがあります。	n
