# Supplementary material
Source: ML conference proceedings conference paper supplement (https://aclanthology.org/2022.eval4nlp-1.9)
Supplement: SupplementaryMaterial [file 1199.xlsx]

## Sheet: Sheet1
person	source	translation	evaluation: is this a good translation?
person 1	what do you like to do ?	趣味は何ですか？	y
person 2	i love art , i teach at a school	芸術が好きで、学校で教えてます。	y
person 1	i love art too which is why i like museums so much .	僕も芸術が好き、だから美術館が大好きなんです。	y
person 2	i used to go to museums with my girlfriend	よく彼女と美術館へ行ったなあ。	y
person 1	there are a lot of museums here in new york city , luckily .	ありがたいことに、ここニューヨーク市には美術館がたくさんあります。	y
person 2	yeah ! the museum of modern art is there right ?	そうそう！近代美術館があるよね？	y
person 1	yes ! my wife and i love going there with our family .	ええ！家内と僕は家族であそこへ行くのが大好きなんですよ。	y
person 2	i have seen some cool stuff online about temporary installations	期間限定の展示について、素晴らしいものをネットで見ましたよ。	y
person 1	i just wrote an article about that recently !	最近、その記事を書いたところです！	y
person 2	really ? ! what is your work ?	本当？！お仕事は何を？	y
person 1	i write for a living .	物書きが仕事です。	y
person 2	for what publication ? or what book ?	どんな出版物？それとも何の本？	y
person 1	children stories , inspired by my nieces and nephews 10 of them !	子供向けの話、１０人いる姪や甥からアイデアをもらいました。	n
person 2	wow , nice i love little kids , they are the best artists	うわあ、素晴らしいですね、僕は小さい子供が大好き、子供は最高の芸術家です。	y
person 1	yes , they love to visit us in nyc because there is so much to do .	うん、甥や姪たちは僕たちに会いにニューヨーク市に来るのが好きなんですよ、やることがたくさんありますからね。	y
person 2	i heard there is more than 25000 restaurants there	そちらには２５０００軒以上のレストランがあるそうですね。	y
