# Supplementary material
Source: ML conference proceedings conference paper supplement (https://aclanthology.org/2022.eval4nlp-1.9)
Supplement: SupplementaryMaterial [file 1201.xlsx]

## Sheet: Sheet1
person	source	translation	evaluation: is this a good translation?
person 1	hello . how are you doing today ?	こんにちは今日はどうですか ？	y
person 2	not good . have you seen my three ring binder ?	３ 本の指輪を見たか ？	n
person 1	no , i have not seen it . have you tried looking on your desk ?	見てないわ机を見たことある ？	n
person 2	yes . it has ponies all over it that i drew .	あるわ描いたものを全部想像してたの	n
person 1	i used to have a pony . my mom had money from ballet .	私は子供がいたママはバレエからお金を持っていた	n
person 2	ah . i draw them while dreaming of becoming a vet .	ペットショップになるのを夢見てる間に描いたんだ	n
person 1	that sounds nice . i am a cashier at a gas station .	いいわねガス駅で泣いてるのよ	n
person 2	i love buying gum at the gas station . but no more . . . . braces , ugh .	ガソリンスタンドは好きだがガムはもう買ってない	n
person 1	in may i will turn twenty six and i just had braces off last year !	今年は ６ 時 2 0 分にしておくよ ！	n
person 2	wow ! the only good part about them is they help me eat less food .	食べない方がいいわよ	n
person 1	well , milkshakes are still on the menu though , right ?	ミルクはまだメニューにあるよね ？	n
person 2	right . i will enjoy one as soon as i find that binder .	そうだなすぐに楽しいよ	n
person 1	i am going to move a a couple months . . . hope i do not lose anything .	何ヶ月も動けば何も失うことはないだろう	n
person 2	good luck . why are you moving ?	幸運をなぜ移動する ？	n
