# Supplementary material
Source: ML conference proceedings conference paper supplement (https://aclanthology.org/2022.eval4nlp-1.9)
Supplement: SupplementaryMaterial [file 1201.xlsx]

## Sheet: Sheet1
person	source	translation	evaluation: is this a good translation?
person 1	hello . how are you doing today ?	こんにちは。元気？	y
person 2	not good . have you seen my three ring binder ?	あまりよくない。私の三穴バインダー見なかった？	y
person 1	no , i have not seen it . have you tried looking on your desk ?	ううん、見てない。机の上は見てみた？	y
person 2	yes . it has ponies all over it that i drew .	うん。バインダーにはポニーがいっぱい描いてある、私が描いたの。	y
person 1	i used to have a pony . my mom had money from ballet .	昔ポニーを飼ってたんだ。ママがバレエでお金を稼いでた。	y
person 2	ah . i draw them while dreaming of becoming a vet .	ふうん。私、獣医になることを想像しながらそれを描いたのよ。	n
person 1	that sounds nice . i am a cashier at a gas station .	素敵ね。私、ガソリンスタンドのレジ係をしてる。	y
person 2	i love buying gum at the gas station . but no more . . . . braces , ugh .	ガソリンスタンドでガムを買うのが好き。でももうできない・・・。矯正器具のせいで、ううっ。	y
person 1	in may i will turn twenty six and i just had braces off last year !	５月に２６才になるんだけど、去年矯正器具をはずしたばかり。	y
person 2	wow ! the only good part about them is they help me eat less food .	いいわね！矯正器具のいいところは、おかげで食べる量が減らせるってことだけ。	y
person 1	well , milkshakes are still on the menu though , right ?	ねえ、それはそうと、ミルクシェークはまだメニューにあるよね？	y
person 2	right . i will enjoy one as soon as i find that binder .	あるよ。例のバインダーを見つけたらすぐにいただくつもり。	y
person 1	i am going to move a a couple months . . . hope i do not lose anything .	私、２，３か月したら引っ越す予定・・・。何も失くさなければいいけど。	n
person 2	good luck . why are you moving ?	頑張ってね。どうして引っ越すの？	y
