# Supplementary material
Source: ML conference proceedings conference paper supplement (https://aclanthology.org/2022.eval4nlp-1.9)
Supplement: SupplementaryMaterial [file 1203.xlsx]

## Sheet: Sheet1
person	source	translation	evaluation: is this a good translation?
person 1	hi how are you doing ?	お元気ですか ？	n
person 2	i am alright how about yourself	元気よあなたは ？	y
person 1	i am good thanks for asking	頼んでくれてありがとうございます	n
person 2	great do you play sports	あなたは素晴らしいスポーツをしている	n
person 1	nope i work to much	私は多くの仕事をしている	n
person 2	do you know what skittles is ?	ヒットルズって何だと思う ？	n
person 1	do you mean the candy ?	「キャンディ」って、どういう意味 ？	n
person 2	no its a lawn game with clubs and stuff	「芝生とクラブの遊びは、できない」	n
person 1	i have never heard of that	今まで聞いたことがないわ	y
person 2	yeah its for older people but i am a professional	ええでも私はプロよ	n
person 1	what do you do for a living ?	何のために生きるの ？	n
person 2	skittles . i am the iron skittler	私は鉄のカトラーです	n
person 1	oh i see , never heard of it	そんなこと聞いたことないよ	n
person 2	you should try its fun	楽しくやってみたら ？	n
person 1	i will have to look it up	私はそれを見なければなりません	n
person 2	true what do you do in your spare time	本当のあなたは時間内に何をしているのでしょう	n
