# Supplementary material
Source: ML conference proceedings conference paper supplement (https://aclanthology.org/2022.eval4nlp-1.9)
Supplement: SupplementaryMaterial [file 1203.xlsx]

## Sheet: Sheet1
person	source	translation	evaluation: is this a good translation?
person 1	hi how are you doing ?	こんにちは、元気？	y
person 2	i am alright how about yourself	元気だよ、君は？	y
person 1	i am good thanks for asking	元気だよ、ありがとう。	y
person 2	great do you play sports	よかった、スポーツはする？	y
person 1	nope i work to much	いいや、仕事ばかり。	n
person 2	do you know what skittles is ?	スキトルズって何か知ってる？	y
person 1	do you mean the candy ?	キャンディのこと？	y
person 2	no its a lawn game with clubs and stuff	ううん、芝生の上で棒とかを使ってするゲームのこと。	y
person 1	i have never heard of that	聞いたことない。	y
person 2	yeah its for older people but i am a professional	そうだよね、年寄りのゲームだし、でも僕はプロなんだ。	y
person 1	what do you do for a living ?	仕事は何をしてるの？	y
person 2	skittles . i am the iron skittler	スキトルズさ。僕は筋金入りのスキトラーだ。	n
person 1	oh i see , never heard of it	へえ、そうなんだ、聞いたことないな。	y
person 2	you should try its fun	やってみて、面白いよ。	y
person 1	i will have to look it up	調べてみるよ。	y
person 2	true what do you do in your spare time	ぜひ、暇なときは何してるの？	n
