# Supplementary material
Source: ML conference proceedings conference paper supplement (https://aclanthology.org/2022.eval4nlp-1.9)
Supplement: SupplementaryMaterial [file 1204.xlsx]

## Sheet: Sheet1
person	source	translation	evaluation: is this a good translation?
person 1	hi how are you today ?	やあ、元気？	y
person 2	i am good i was just out riding my horse how are you ?	元気だよ、ちょうど外で乗馬してた、君は元気？	y
person 1	i am good . i plan on going to a festival .	元気だよ。祭りに行く予定。	y
person 2	that sounds like fun . i would love to go and take my seven girlfriends .	楽しそうだね。僕は彼女を７人連れて行きたいな。	y
person 1	you have seven girlfriends ? that is funny	彼女が七人いるの？それ、おかしいよ。	y
person 2	oh yes i have many . i am from argentina , we cannot have just one . do you ?	ああ、そうだよ、たくさんいる。僕はアルゼンチン出身なんだ、たった一人なんてありえない。君は？	y
person 1	i do not have a girlfriend . do they know about each other ?	彼女はいないよ。君の彼女たちはお互い知り合いなの？	y
person 2	yes , they do , we all go and eat steak together i love beef , cannot get enough .	うん、そうだよ、僕たち、みんな一緒にステーキを食べに行くんだ、牛肉、大好き、いくらでも食べれる。	y
person 1	i also love to eat all sorts of meat	僕もどんな肉でも好き。	y
person 2	just do not eat horse meat , my little rosebud would be sad . what else do you do ?	馬肉だけは食べないでね、僕の馬が悲しむから。何の仕事してるの？	n
person 1	i just started a online business , so i can work online	ネットビジネスを立ち上げたばかり、だからオンラインで仕事ができる。	y
person 2	that is great , do you sell boots ? i love wearing cowboy boots .	それはすごいな、ブーツは売ってる？カウボーイブーツを履くのが大好き。	y
person 1	no boots unfortunately . i sell my homemade candles	残念だけどブーツはない。自家製のキャンドルを販売してる。	y
person 2	ahh my girlfriends would love some candles , i would like to buy a dozen .	ああ、僕の彼女たち、キャンドルは気に入るだろうな、１ダース、買いたい。	y
