# Supplementary material
Source: ML conference proceedings conference paper supplement (https://aclanthology.org/2022.eval4nlp-1.9)
Supplement: SupplementaryMaterial [file 1204.xlsx]

## Sheet: Sheet1
person	source	translation	evaluation: is this a good translation?
person 1	hi how are you today ?	今日はどうだった ？	n
person 2	i am good i was just out riding my horse how are you ?	馬に乗るのは得意なんだ	n
person 1	i am good . i plan on going to a festival .	いいよ祭りに行くんだ	y
person 2	that sounds like fun . i would love to go and take my seven girlfriends .	楽しそうだわ ７ 人のガールフレンドを連れて行きたいわ	n
person 1	you have seven girlfriends ? that is funny	７ 人の彼女がいるのは面白いか ？	n
person 2	oh yes i have many . i am from argentina , we cannot have just one . do you ?	ああアルゼンチンから来たんだ １ 人じゃ無理かな ？	n
person 1	i do not have a girlfriend . do they know about each other ?	彼女はいないお互いのことを知ってるのか ？	y
person 2	yes , they do , we all go and eat steak together i love beef , cannot get enough .	ええみんな一緒にステーキを食べるのが好きなの	n
person 1	i also love to eat all sorts of meat	肉を食べるのも好きだ	n
person 2	just do not eat horse meat , my little rosebud would be sad . what else do you do ?	馬を食べないでくれ他に何をする ？	n
person 1	i just started a online business , so i can work online	ネットの仕事を始めたからネットでネットを調べても ？	n
person 2	that is great , do you sell boots ? i love wearing cowboy boots .	すごい靴を売ってるのかカウボーイのブーツは大好きだ	y
person 1	no boots unfortunately . i sell my homemade candles	靴もパンも売ったし家のキャンドルも売ったし	n
person 2	ahh my girlfriends would love some candles , i would like to buy a dozen .	私の彼女がロウソクを買ってくれたら １ ダース買ってあげたい	n
