# Supplementary material
Source: ML conference proceedings conference paper supplement (https://aclanthology.org/2022.eval4nlp-1.9)
Supplement: SupplementaryMaterial [file 1205.xlsx]

## Sheet: Sheet1
person	source	translation	evaluation: is this a good translation?
person 1	hey how is your day going ?	今日はどうだ ？	n
person 2	pretty well how about you	元気そうだな	n
person 1	i am doing good , busy day	今日はとても忙しいんだ	n
person 2	why so busy then friend	ならなぜ忙しいんだ ？	n
person 1	i am in the lab working all day , and afterwords i have a big gymnastics meet	研究室で毎日仕事をしているそしてその後大きなジプシーに会うことになる	n
person 2	woah do you have any family	家族はいるのかね ？	y
person 1	just my parents who are also working in the lab today , what about you ?	今日、私の両親も研究室で働いてるわあなたは ？	n
person 2	my brother and i are twins	兄と私は双子なの	n
person 1	that is so cool . what kind of music do you like ?	素敵な音楽ねどんな音楽が好きなの ？	n
person 2	any that i can tap dance to	踊ってもいいけど	n
person 1	if you can tap to the beatles that would be so amazing	もし、あなたがトウモロコシに接続することができたら、それは非常に驚くでしょう。	n
person 2	yeah i have won championships for tap	うん、私は、私は船を再送信するために船を獲得している	n
person 1	wow that is really cool i hope to win a medal as well for gymnastics	それは本当にクールです....... 私は本当に素晴らしいメダルを獲得するために...... プロのために勝利したいと思います	n
person 2	gotta do your flips and tricks	あなたの行動とトリックをしなければなりません。	n
