# Supplementary material
Source: ML conference proceedings conference paper supplement (https://aclanthology.org/2022.eval4nlp-1.9)
Supplement: SupplementaryMaterial [file 1205.xlsx]

## Sheet: Sheet1
person	source	translation	evaluation: is this a good translation?
person 1	hey how is your day going ?	こんにちは、調子はどう？	y
person 2	pretty well how about you	とても元気、あなたは？	y
person 1	i am doing good , busy day	元気よ、忙しい一日だけど。	y
person 2	why so busy then friend	どうしてそんなに忙しいの？	y
person 1	i am in the lab working all day , and afterwords i have a big gymnastics meet	一日中研究室で働いてるし、その後、体操の大きな試合があるの。	y
person 2	woah do you have any family	うわあ、家族はいるの？	y
person 1	just my parents who are also working in the lab today , what about you ?	両親だけ、二人も今日は研究室で仕事してる、あなたは？	y
person 2	my brother and i are twins	弟と私は双子なの。	y
person 1	that is so cool . what kind of music do you like ?	とても素敵。どんな音楽が好き？	y
person 2	any that i can tap dance to	タップダンスに合わせられるなら何でも。	y
person 1	if you can tap to the beatles that would be so amazing	ビートルズに合わせてタップを踊れたら、とても素晴らしいでしょうね。	y
person 2	yeah i have won championships for tap	ええ、私、タップで何度か優勝してる。	y
person 1	wow that is really cool i hope to win a medal as well for gymnastics	わあ、それ、本当にすごい。私も体操でメダルが取りたい。	y
person 2	gotta do your flips and tricks	宙返りとかしなきゃね。	y
