# Supplementary material
Source: ML conference proceedings conference paper supplement (https://aclanthology.org/2022.eval4nlp-1.9)
Supplement: SupplementaryMaterial [file 1207.xlsx]

## Sheet: Sheet1
person	source	translation	evaluation: is this a good translation?
person 1	hi there . how are you ?	こんにちは。元気？	y
person 2	i am good but my feet hurt . i am in retail and i stand all day .	元気よ、でも足が痛い。小売店で働いてて、一日中立ちっぱなし。	y
person 1	that sounds tough ! how long have you been doing that ?	大変そう！その仕事はもうどれくらい？	y
person 2	years , i am a store manager now . so i finally make enough to see concerts	もう長いわ、今は店長なの。だからやっとコンサートに行くぶんは稼げる。	y
person 1	that is cool . do you like movies ?	いいね。映画は好き？	y
person 2	i guess but i spend my money on concerts . 10 a year minimum lol	たぶん、でもコンサートにお金を使ってる。一年に最低１０回（笑）。	n
person 1	wow , that is a lot . i am an actor so i am really into movies .	わあ、それは多いね。僕は俳優だから映画は本当に好き。	y
person 2	i am really into lady gaga right now . what parts have you done ?	私は今、レディ・ガガにすごくはまってる。どんな役をやったの？	y
person 1	i played an orphan in annie . i have been acting since i was a kid .	アニーで孤児の役をやった。子供の頃からずっと俳優としてやってきたんだ。	y
person 2	do you make a lot of money doing that ?	その仕事、収入は多いの？	y
person 1	i make a good living , especially now . i am a regular on a telenovela .	かなり稼いでる、特に今はね。テレノベラのレギュラーなんだ。	y
person 2	do you speak spanish ? i love spanish music	スペイン語は話せるの？私、スペイン音楽大好き。	y
