# Supplementary material
Source: ML conference proceedings conference paper supplement (https://aclanthology.org/2022.eval4nlp-1.9)
Supplement: SupplementaryMaterial [file 1207.xlsx]

## Sheet: Sheet1
person	source	translation	evaluation: is this a good translation?
person 1	hi there . how are you ?	やぁ元気か ？	y
person 2	i am good but my feet hurt . i am in retail and i stand all day .	足は大丈夫だけど足が痛いし毎日立ってるから	n
person 1	that sounds tough ! how long have you been doing that ?	それは大変だいつからやってたんだ ？	y
person 2	years , i am a store manager now . so i finally make enough to see concerts	私は今は店長だからやっと監督に会いに行った	n
person 1	that is cool . do you like movies ?	いいわ映画は好き ？	n
person 2	i guess but i spend my money on concerts . 10 a year minimum lol	でも １ ０ 年も私の金をチャリティーで過ごすのに １ ０ 年はかかりそう	n
person 1	wow , that is a lot . i am an actor so i am really into movies .	僕は俳優だから映画に出てるんだ	n
person 2	i am really into lady gaga right now . what parts have you done ?	女性に夢中なの何をしたの ？	n
person 1	i played an orphan in annie . i have been acting since i was a kid .	子供の頃から孤児を演じてたんだ	n
person 2	do you make a lot of money doing that ?	大金を稼いでるのか ？	n
person 1	i make a good living , especially now . i am a regular on a telenovela .	今は元気に暮らしているよ特にテレパシーでね	n
person 2	do you speak spanish ? i love spanish music	退屈な音楽が好きなのか ？	n
