# Supplementary material
Source: ML conference proceedings conference paper supplement (https://aclanthology.org/2022.eval4nlp-1.9)
Supplement: SupplementaryMaterial [file 1209.xlsx]

## Sheet: Sheet1
person	source	translation	evaluation: is this a good translation?
person 1	hello tell me about yourself	ハイ自分のことを話してくれないか ？	n
person 2	well , i live in florida . i just started 10 th grade and i love science . you ?	フロリダに住んで 1 0 年生と科学を始めたばかりなんだ	n
person 1	i live in vegas , personal trainer , like fishing and hiking	私はガスの中に住んでいます個人的な調教師のように釣りや釣りのようなものです	n
person 2	very cool . we have three dogs . our latest is named maddie .	３ 匹の犬がいるわ新しい犬が ３ 匹いるの	n
person 1	nice i love dogs too , i have two pitbulls	私もいい犬が ２ 匹いるの	n
person 2	very cool . i just got braces last month . not fun .	先週は楽しんでないから	n
person 1	braces are so pretty just hurt i am assuming	足がすごく痛いんだ	n
person 2	they do . the pain is less tho .	そうだ痛みはない	n
person 1	that is good , pain medication helping ?	それでいい痛み薬は ？	n
person 2	all i can use is a gel pain medication .	私が使うのはヘビの薬だけだ	n
person 1	dang that does not sound like much	そんな音は聞きたくない	n
person 2	it is better than it was when they put them in .	奴らが入った時よりマシだった	n
person 1	i bet how long ago was that ?	どのくらい前の話だ ？	n
person 2	about a month ago it was .	１ ヶ月前の話だ	n
person 1	man that is not long ago at all , that sucks if you do not like it	あの男はずっと前にはいなかったもし気に入らなかったら	n
person 2	well , i need to have it done .	やらなきゃならないんだ	n
