# Supplementary material
Source: ML conference proceedings conference paper supplement (https://aclanthology.org/2022.eval4nlp-1.9)
Supplement: SupplementaryMaterial [file 1209.xlsx]

## Sheet: Sheet1
person	source	translation	evaluation: is this a good translation?
person 1	hello tell me about yourself	こんにちは、君のこと教えて。	y
person 2	well , i live in florida . i just started 10 th grade and i love science . you ?	ええと、フロリダに住んでる。１０年生になったばかりで理科が好き。あなたは？	y
person 1	i live in vegas , personal trainer , like fishing and hiking	僕はラスベガスに住んでる、パーソナルトレーナー、釣りとハイキングが好き。	y
person 2	very cool . we have three dogs . our latest is named maddie .	超素敵。私、犬を３匹飼ってる。最近うちに来た子はマディっていう名前。	y
person 1	nice i love dogs too , i have two pitbulls	いいね、犬は大好きだ、僕はピットブルを二匹飼ってる。	y
person 2	very cool . i just got braces last month . not fun .	超かっこいい。先月、歯の矯正器具を入れたばかりなんだ。やだなあ。	n
person 1	braces are so pretty just hurt i am assuming	矯正器具はとてもかわいいよ、ただ痛いだろうけどね。	y
person 2	they do . the pain is less tho .	かわいいよね。でも痛みはそれほどでもないの。	n
person 1	that is good , pain medication helping ?	それはよかった、痛み止めは効いてる？	y
person 2	all i can use is a gel pain medication .	私が使えるのは、ジェルの痛み止めだけ。	y
person 1	dang that does not sound like much	げっ、それはあまり効かなそうだね。	n
person 2	it is better than it was when they put them in .	矯正器具を着けたときよりましよ。	n
person 1	i bet how long ago was that ?	それはどれくらい前？	y
person 2	about a month ago it was .	一か月くらい前。	y
person 1	man that is not long ago at all , that sucks if you do not like it	ええっ、それ、つい最近じゃないか、辛かったら最悪だね。	y
person 2	well , i need to have it done .	うーん、矯正やってもらわないといけないの。	y
