# Supplementary material
Source: ML conference proceedings conference paper supplement (https://aclanthology.org/2022.eval4nlp-1.9)
Supplement: SupplementaryMaterial [file 1210.xlsx]

## Sheet: Sheet1
person	source	translation	evaluation: is this a good translation?
person 1	hi how are you doing ?	元気か ？	n
person 2	good ! thank you for asking . how about you ?	聞いてくれてありがとうあなたは ？	n
person 1	i am good thanks for asking	頼んでくれてありがとう	n
person 2	what kind of things do you like to do in spare time ?	時間に何をしたいんだ ？	n
person 1	i would say garden in my backyard	庭の庭で何をしたい ？	n
person 2	oooo that is awesome ! ! i like to can from our garden .	最高だ庭から出してくれ	n
person 1	what do you mean can ?	どういう意味だ ？	n
person 2	canning preserving the , in jars . sometimes jams and things like that .	戦争に参加すると時々妨害される	n
person 1	oh ok that sounds fun	楽しそうだな	n
person 2	i have a lot of vintage jars from the 20s . its so much fun !	私は 2 0 年代から多くのヴィンテージを持っていますとても楽しいです ！	n
person 1	are they those mason jars ?	彼らは、これらの息子ですか ？	n
person 2	yes they are . there is a few kinds . the really old ones are blue .	ええ、いくつかの種類があります古いものは、実際にはいくつかのいくつかの青いです。	n
person 1	what do you do for a living ?	何のために生活してるんだ ？	n
person 2	i impersonate paul mccartney on the bass	俺はベースで演奏してるんだ	n
person 1	is that how you earn money ?	それで金はどうやって稼ぐんだ ？	n
person 2	yes it is . i get a lot of gigs at the indian casinos .	カジノでたくさんのギグを手に入れた	n
