# Supplementary material
Source: ML conference proceedings conference paper supplement (https://aclanthology.org/2022.eval4nlp-1.9)
Supplement: SupplementaryMaterial [file 1210.xlsx]

## Sheet: Sheet1
person	source	translation	evaluation: is this a good translation?
person 1	hi how are you doing ?	こんにちは、元気？	y
person 2	good ! thank you for asking . how about you ?	元気だよ！ありがとう。君は？	y
person 1	i am good thanks for asking	元気。ありがとう。	y
person 2	what kind of things do you like to do in spare time ?	暇なときはどんなことをしてるの？	y
person 1	i would say garden in my backyard	裏庭でガーデニングかな。	y
person 2	oooo that is awesome ! ! i like to can from our garden .	へえーそれはすごい！！！僕は自分ちの庭で缶詰するのが好き。	y
person 1	what do you mean can ?	缶詰するってどういうこと？	y
person 2	canning preserving the , in jars . sometimes jams and things like that .	缶詰だよ、保存食を作るの、ビンに入れてね。ジャムとかそういうのをときどきね。	y
person 1	oh ok that sounds fun	ああ、わかった、楽しそうだね。	y
person 2	i have a lot of vintage jars from the 20s . its so much fun !	２０年代の古いビンがたくさんある。めちゃくちゃ楽しいよ！	y
person 1	are they those mason jars ?	それってあのメーソンジャー？	y
person 2	yes they are . there is a few kinds . the really old ones are blue .	そうだよ。数種類ある。すっごく古いのは青いんだ。	y
person 1	what do you do for a living ?	仕事は何をしてるの？	y
person 2	i impersonate paul mccartney on the bass	ベースでポール・マッカートニーのものまねをしてる。	y
person 1	is that how you earn money ?	それで稼いでるの？	y
person 2	yes it is . i get a lot of gigs at the indian casinos .	そうだよ。インディアン・カジノでは仕事がいっぱいあるんだ。	y
