# Supplementary material
Source: ML conference proceedings conference paper supplement (https://aclanthology.org/2022.eval4nlp-1.9)
Supplement: SupplementaryMaterial [file 1212.xlsx]

## Sheet: Sheet1
person	source	translation	evaluation: is this a good translation?
person 1	good evening , how has your day been ?	こんばんは、今日はどうだった？	y
person 2	it was good i met up with some friends to larp	よかったよ、ライブRPGで友達と集まった。	y
person 1	i wish i had time for that , working 40 hours in a bank is killing me .	そんな時間があればなあ、銀行で４０時間勤務は死にそうだよ。	y
person 2	yikes , you have to make time for friends and fun .	うわっ、友達と趣味の時間作らなきゃ。	n
person 1	i know but i am so focused on doing a good job that i forget to .	そうなんけど、いい仕事をすることに必死で忘れるんだ。	y
person 2	do you have a family	結婚してるの？	y
person 1	i do ! i have a two year old little girl . you ?	もちろん！二歳の娘がいる。君は？	y
person 2	i do not have any right now . what is your daughters name	ぼくはまだ。娘さんの名前は？	y
person 1	i call her pie which is super cute when she tells people that is her name .	僕はパイって呼んでるんだけど、娘が人にそれが自分の名前だって言うとき、すっごくかわいいんだ。	y
person 2	that is very cute , indeed	すごくかわいいね、まじで。	y
person 1	do you have plans tomorrow ? i am hoping to go to a restaurant .	明日の予定は？僕はレストランへ行きたいと思ってる。	y
person 2	i am going to larp again tomorrow , i am a general of an oarfish army	明日はまたライブRPGをやる予定。僕、リュウグウノツカイ軍団の将軍なんだ。	y
person 1	i played a tabletop vampire game for years . that was fun .	何年もヴァンパイアの卓上用ゲームをやったな。楽しかった。	y
person 2	really , what was the name of it ?	そうなんだ、何て名前のゲーム？	y
person 1	vampire masquerade . i think i still have my clan books somewhere .	ヴァンパイア・ザ・マスカレード。どこかにまだクランブックが何冊かあると思う。	y
person 2	i have not played that but will have to check it out	それはやったことないけど、チェックしてみるよ。	y
