# Supplementary material
Source: ML conference proceedings conference paper supplement (https://aclanthology.org/2022.eval4nlp-1.9)
Supplement: SupplementaryMaterial [file 1212.xlsx]

## Sheet: Sheet1
person	source	translation	evaluation: is this a good translation?
person 1	good evening , how has your day been ?	今晩はどうだった ？	n
person 2	it was good i met up with some friends to larp	友達と会えて良かったわ	n
person 1	i wish i had time for that , working 40 hours in a bank is killing me .	銀行で 4 0 時間働いて 4 0 時間働いてたら私を殺してくれたわ	n
person 2	yikes , you have to make time for friends and fun .	友達のために時間を作って楽しんでくれ	n
person 1	i know but i am so focused on doing a good job that i forget to .	わかってるけど私はとても良い仕事をしてるの忘れないようにしてるの	n
person 2	do you have a family	家族はいるのか ？	y
person 1	i do ! i have a two year old little girl . you ?	２ 歳の女の子がいるんだぞ	n
person 2	i do not have any right now . what is your daughters name	今は持ってない娘の名前は何だ ？	y
person 1	i call her pie which is super cute when she tells people that is her name .	彼女のホットパイと呼んでいる人が名前を言うとすごくかわいいと電話した	n
person 2	that is very cute , indeed	本当に素敵だわ	n
person 1	do you have plans tomorrow ? i am hoping to go to a restaurant .	明日の予定はある ？	n
person 2	i am going to larp again tomorrow , i am a general of an oarfish army	明日また精神病院に行く	n
person 1	i played a tabletop vampire game for years . that was fun .	ヴァンパイアの試合を何年も弾いてきた楽しかった	n
person 2	really , what was the name of it ?	本当にその名前は ？	n
person 1	vampire masquerade . i think i still have my clan books somewhere .	ヴァンパイア･マナーはまだ私の家のどこかに本があると思うわ	n
person 2	i have not played that but will have to check it out	そんなことはしてないけど調べないと	y
