# Supplementary material
Source: ML conference proceedings conference paper supplement (https://aclanthology.org/2022.eval4nlp-1.9)
Supplement: SupplementaryMaterial [file 1215.xlsx]

## Sheet: Sheet1
person	source	translation	evaluation: is this a good translation?
person 1	hello my name is jake how are u	こんにちは私の名前はクジャク	n
person 2	i am great . i needed to take a break from studying	勉強の必要があってね	n
person 1	i know the feeling just took my husky tyrion on a walk	♪ 歩いて歩いてきた気がするんだ	n
person 2	i bet that gives you good exercise . i get most of mine biking to school	♪ 君にいい練習をさせてくれると思うよ ♪ 学校で一番の王になる	n
person 1	sadly i did not get that luxury in canada the roads are steep	（ 徹信 ） そんな贅沢な道であったとは思いませんでしたけど	n
person 2	oh you are in canada ? i am lucky my school is only a mile from me	私の学校は 1 3 マイルだけよ	n
person 1	yeah and school was 13 miles away , whats your favorite food ?	1 3 マイル離れた学校は好きな食べ物が好きだったのか ？	n
person 2	anything that is quick . that i can eat while i am on my new laptop	何でもないよ新しいノートに入って食べられるんだ	n
person 1	nice i love my laptop as much as i love tilapia	素敵なノートパソコンが好きなの	n
person 2	haha tilapia is yummy . my laptop is great but the battery is horrible	パソコンは美味しくておいしいけどバッテリーは最悪よ	n
person 1	haha i know that my rc cars would lose races if their battery was like my laptop	私の車はパソコンのように壊れてしまうかもしれませんが	n
person 2	that sounds like a lot of fun . i am a writer during my spare time	楽しそうだな時間内に作家なんだ	n
person 1	i got into it helping my nephew so we race together	甥を助けに行ったから一緒に競争したんだ	n
person 2	that is a really great bonding experience .	本当に素晴らしい経験だわ	n
person 1	yeah i do not have kids so its nice	いい子がいないんだ	n
person 2	me neither . so what do you look like ?	私もよどんな顔してるの ？	y
