# Supplementary material
Source: ML conference proceedings conference paper supplement (https://aclanthology.org/2022.eval4nlp-1.9)
Supplement: SupplementaryMaterial [file 1215.xlsx]

## Sheet: Sheet1
person	source	translation	evaluation: is this a good translation?
person 1	hello my name is jake how are u	こんにちは。僕ジェイクっていうんだけど、調子はどうかな？	y
person 2	i am great . i needed to take a break from studying	とってもいいわよ。勉強してて休憩が必要だったところなの。	y
person 1	i know the feeling just took my husky tyrion on a walk	その気持ち、わかるなぁ。僕はちょうどハスキー犬のティリオンを散歩してきたところなんだ。	y
person 2	i bet that gives you good exercise . i get most of mine biking to school	それはきっといい運動になるわね。私だと自転車通学がほとんど運動になってるよ。	y
person 1	sadly i did not get that luxury in canada the roads are steep	残念ながら僕にはそんな贅沢はなかったなぁ。カナダは道が急だから。	y
person 2	oh you are in canada ? i am lucky my school is only a mile from me	え、カナダに居るの？私の学校はうちからたった1マイルでよかった！	y
person 1	yeah and school was 13 miles away , whats your favorite food ?	そうだよ。それに学校は13マイル離れてたしね。君の一番好きな食べ物は？	y
person 2	anything that is quick . that i can eat while i am on my new laptop	新しいノートパソコンに向かってる間に、ささっと食べられるものならなんでも。	y
person 1	nice i love my laptop as much as i love tilapia	いいね。僕はティラピアと同じくらい自分のノートパソコンが気に入ってるんだ。	y
person 2	haha tilapia is yummy . my laptop is great but the battery is horrible	ハハハ、ティラピアって美味しいよね。私のノートパソコンはとってもいいんだけど、バッテリーが最悪なの。	y
person 1	haha i know that my rc cars would lose races if their battery was like my laptop	ハハハ、もしラジコンのバッテリーが僕のノートパソコンのバッテリー程度だったら、レースには負けるだろうな。	y
person 2	that sounds like a lot of fun . i am a writer during my spare time	それ、かなり面白そう。私ね、空いている時間に執筆活動してるんだー。	y
person 1	i got into it helping my nephew so we race together	甥っ子を手伝ってたらラジコンにハマっちゃって、一緒にレースしてるってわけ。	y
person 2	that is a really great bonding experience .	それって絆が深まる本当に素敵な経験ね。	y
person 1	yeah i do not have kids so its nice	そうなの。自分は子持ちじゃないから、こういうのっていいんだよね。	y
person 2	me neither . so what do you look like ?	私にもいないわ。で、ジェイクの見た目ってどんな感じ？	y
