# Supplementary material
Source: ML conference proceedings conference paper supplement (https://aclanthology.org/2022.eval4nlp-1.9)
Supplement: SupplementaryMaterial [file 1216.xlsx]

## Sheet: Sheet1
person	source	translation	evaluation: is this a good translation?
person 1	hello . it is nice to talk to someone this evening .	こんばんは。今夜、誰かと話せて嬉しいな。	y
person 2	agreed . i need some downtime after my long bike ride today .	同感よ。今日は自転車に長く乗ってたから、息抜きが必要なの。	y
person 1	i hear you . my job at the railroad office has been stressful lately .	わかるなぁ。最近、鉄道事務所の仕事でストレスが溜まってて。	y
person 2	i like being outside in nature so your job sounds interesting . do you like it ?	私は自然の中で過ごすのが好きだし、あなたのお仕事って面白そうね。気に入ってる？	y
person 1	i love it . there is always something interesting happening . what do you do ?	気に入ってるよ。常に何かしら面白いことが起こるんでね。そちらのお仕事は？	y
person 2	i went to culinary school in europe and i am a chef at an italian french restaurant .	ヨーロッパで料理学校に通ったの。で、イタリア料理とフランス料理をやってるレストランでシェフをしてるわ。	y
person 1	that sounds really interesting ! what is your favorite dish to make ?	それはかなり興味深いね！得意料理は何？	y
person 2	veal in red wine sauce with winter vegetables . whats your favorite to eat ?	子牛の赤ワインソース、冬野菜添え。あなたの一番好きな食べ物は？	y
person 1	i will eat just about anything , but pretzels are my favorite . simple , yet delicious .	ほとんど何でも食べるけど、一番の好物はプレッツェル。素朴でありながら美味しいという。	y
person 2	sounds good . do you speak any other languages ?	いいわね。他の言語は話す？	y
person 1	i do not . are you fluent in any other languages ?	いいや。そちらは他の言語に堪能なの？	y
person 2	yes 3 . going to school in europe was a big help . have you been there ?	ええ、3カ国語よ。ヨーロッパで学校に通ったのがすごく役に立ったわ。ヨーロッパには行ったことある？	y
person 1	i have once . i saw my favorite band in germany . vnv nation !	一度ね。一番好きなバンドをドイツで観てきたんだ。VNVネイションだよ！	y
person 2	awesome . i love going to concerts .	凄い。私、コンサートに行くの大好きよ。	y
person 1	i do , too . but most days , i would rather stay in and watch something . netflix and chill .	僕も大好き。でも大抵は、どっちかっていうと家に居て何かしら観てる。ネットフリックス観てだらだらするの。	y
person 2	nice . personally i would rather be out in nature biking when i am not cooking .	いいね。私的には、料理してない時には自然豊かなところでサイクリングする方がいいかな。	y
