# Supplementary material
Source: ML conference proceedings conference paper supplement (https://aclanthology.org/2022.eval4nlp-1.9)
Supplement: SupplementaryMaterial [file 1216.xlsx]

## Sheet: Sheet1
person	source	translation	evaluation: is this a good translation?
person 1	hello . it is nice to talk to someone this evening .	今晩は誰かと話してくれて嬉しいわ	n
person 2	agreed . i need some downtime after my long bike ride today .	そうとも今日は自転車に乗る時間が必要なんだ	n
person 1	i hear you . my job at the railroad office has been stressful lately .	聞いているよ地下鉄の駅で仕事が忙しくてね	n
person 2	i like being outside in nature so your job sounds interesting . do you like it ?	君の仕事の外が好きなんだ気に入ったか ？	n
person 1	i love it . there is always something interesting happening . what do you do ?	面白いことが起きたいつでも何が起こるんだ ？	n
person 2	i went to culinary school in europe and i am a chef at an italian french restaurant .	私は看護学校に行って私はフランス料理店のシェフよ	n
person 1	that sounds really interesting ! what is your favorite dish to make ?	面白いわね好きな料理は何を作るの ？	n
person 2	veal in red wine sauce with winter vegetables . whats your favorite to eat ?	冬に赤いソースに赤いソースを入れて野菜を食べたいの ？	n
person 1	i will eat just about anything , but pretzels are my favorite . simple , yet delicious .	何か食べてくるけどとてもおいしいわ	n
person 2	sounds good . do you speak any other languages ?	いい言葉ね他に言語を話せる ？	n
person 1	i do not . are you fluent in any other languages ?	わからない他の言語で感動してるのか ？	n
person 2	yes 3 . going to school in europe was a big help . have you been there ?	3 つのロープで学校に行くのは大変だった	n
person 1	i have once . i saw my favorite band in germany . vnv nation !	昔は好きなバンドをたくさん見た	n
person 2	awesome . i love going to concerts .	最高だ楽しんでるよ	n
person 1	i do , too . but most days , i would rather stay in and watch something . netflix and chill .	私もだけどネットやネットで見てみたいわ	n
person 2	nice . personally i would rather be out in nature biking when i am not cooking .	私が料理しないと自然に出て行きたいわ	n
