# Supplementary material
Source: ML conference proceedings conference paper supplement (https://aclanthology.org/2022.eval4nlp-1.9)
Supplement: SupplementaryMaterial [file 1217.xlsx]

## Sheet: Sheet1
person	source	translation	evaluation: is this a good translation?
person 1	hi . do you have a cat or dog or bird or horse ?	こんにちは。猫か犬か鳥か馬は飼ってる？	y
person 2	hey there , i do have a dog . his name is charley . you ?	こんにちは。うちには犬がいるよ。チャーリーっていうの。おたくは？	y
person 1	i have cows , pigs , goats , chickens , cats , dogs , horses , and geese .	うちにはね、牛と豚と山羊と鶏と、猫と犬と馬とガチョウがいるわ。	y
person 2	that is cool . do you have a farm ? my two brothers have a farm .	凄いな。農場があるの？うちの兄弟二人も農場やってるよ。	y
person 1	yes . i grow my own vegetables since that is all i eat .	そうよ。野菜しか食べないから、自分で野菜を育ててるの。	y
person 2	so you are a vegetarian ? if i ate more vegetables maybe i would be taller .	それじゃ、菜食主義者？僕ももっと野菜を食べたら、もっと背が高くなるだろうなぁ。	y
person 1	yes . i tend to my garden while my chickens and i listen to good old country music .	そうよ。鶏と私とで古き良き時代のカントリーミュージックを聴きなら、菜園の手入れをするの。	y
person 2	farms sound great . i should find one to work on . i need a job .	農場ってよさそうだね。僕も取り組むべきものを見つけなくっちゃいけないな。仕事が要るんだ。	y
person 1	speaking of jobs , when i worked as an actress , i pretended to be a country singer .	仕事と言えば、女優をやってた時に、カントリーミュージックの歌手のふりをしたことがあったっけ。	y
person 2	really ? were you in a movie ?	ホント？映画に出たの？	y
person 1	no just a dog food commercial with a cat that thought they were trisha yearwood .	ううん。自分のことをトリーシャ・イヤウッドだと思ってる猫が出てくる、ドッグフードのコマーシャルってだけよ。	y
person 2	that is neat . maybe my dog and i have seen that commercial .	それは凄いな。うちの犬も僕も、たぶんそのコマーシャル見たことあると思う。	y
