# Supplementary material
Source: ML conference proceedings conference paper supplement (https://aclanthology.org/2022.eval4nlp-1.9)
Supplement: SupplementaryMaterial [file 1217.xlsx]

## Sheet: Sheet1
person	source	translation	evaluation: is this a good translation?
person 1	hi . do you have a cat or dog or bird or horse ?	猫や鳥はいるか ？	n
person 2	hey there , i do have a dog . his name is charley . you ?	犬がいるんだ彼の名はシャーリーか ？	n
person 1	i have cows , pigs , goats , chickens , cats , dogs , horses , and geese .	牛、ヤギ、ヤギ、ヤギ、ヤギ、ヤギ、馬、馬、馬、ガチョウ	n
person 2	that is cool . do you have a farm ? my two brothers have a farm .	いい農場だ兄弟が二人いる	n
person 1	yes . i grow my own vegetables since that is all i eat .	ああ食べてからずっと野菜を栽培してるんだ	y
person 2	so you are a vegetarian ? if i ate more vegetables maybe i would be taller .	ベジタリアンなの ？ もっと背が高くなるかも	n
person 1	yes . i tend to my garden while my chickens and i listen to good old country music .	ニワトリがいる間に私の庭を作っていい曲を聞きたいわ	n
person 2	farms sound great . i should find one to work on . i need a job .	いい腕だ仕事を見つけないと	n
person 1	speaking of jobs , when i worked as an actress , i pretended to be a country singer .	女優として働いていた時は国の歌手になりたかった	n
person 2	really ? were you in a movie ?	映画に出てたのか ？	n
person 1	no just a dog food commercial with a cat that thought they were trisha yearwood .	犬と料理する犬だけでなくクラスウッドだと思ってた	n
person 2	that is neat . maybe my dog and i have seen that commercial .	それはいい犬と私の犬と私は観たことがある	n
