# Supplementary material
Source: ML conference proceedings conference paper supplement (https://aclanthology.org/2022.eval4nlp-1.9)
Supplement: SupplementaryMaterial [file 1222.xlsx]

## Sheet: Sheet1
person	source	translation	evaluation: is this a good translation?
person 1	hello there , how are you today ?	こんにちは。今日は調子はどう？	y
person 2	hi , i am doing fine , just a little tired .	どうも。元気にしてるよ。ちょっと疲れてるだけ。	y
person 1	oh i hear you there , i am a bit sleepy myself	ああ、わかるよ。僕自身ちょっと眠いし。	y
person 2	i think i need a vacation from work . cutting down trees is exhausting .	休みが要るんだと思う。木の伐採はキツいよ。	y
person 1	my father was a lumberjack , so was i until a tree nearly cracked my skull open .	うちの父親も木こりだったから、僕も危うく木が頭蓋骨をぱっくりカチ割りそうになるまでは、木こりだったよ。	n
person 2	that is horrible ! what do you do now ?	そりゃ、ぞっとするな！今は何やってるの？	y
person 1	i drive for user and left .	ウーバーとリフトの運転手。	n
person 2	that sounds interesting . what do you do in your free time ?	面白そうだね。暇な時には何してる？	y
person 1	i love to read and spend time with my family . how about you ?	本を読むのと、家族と過ごすのが好きなんだ。君は？	y
person 2	i love to go fishing . its the most peaceful thing in the world .	釣りが大好き。この世で一番のどかなやつ。	y
person 1	i used to love fishing , until an alligator nearly ripped my arm off .	昔は釣りが大好きだったなぁ。ワニに腕を引き千切られそうになるまではね。	y
person 2	you just have some bad luck , do not you ?	ちょっと悪運続きじゃない？	y
person 1	yes indeed , i feel as though i live in the final destination universe .	その通り。まるでファイナル・デスティネーションの世界に住んでるような気がするよ。	y
person 2	that is okay , i feel like i am a legend in a tall tale .	それでいいんじゃない。僕は、自分がほら話に出てくる伝説的人物って感じがするな。	n
