# Supplementary material
Source: ML conference proceedings conference paper supplement (https://aclanthology.org/2022.eval4nlp-1.9)
Supplement: SupplementaryMaterial [file 1222.xlsx]

## Sheet: Sheet1
person	source	translation	evaluation: is this a good translation?
person 1	hello there , how are you today ?	こんにちは今日はどうですか ？	y
person 2	hi , i am doing fine , just a little tired .	ちょっと疲れただけだよ	n
person 1	oh i hear you there , i am a bit sleepy myself	ああ、そこにいると眠くなる	n
person 2	i think i need a vacation from work . cutting down trees is exhausting .	仕事から休みが必要なの木は疲れるわ	n
person 1	my father was a lumberjack , so was i until a tree nearly cracked my skull open .	父はジャックジャックジャックだっただから木が折れたまではね	n
person 2	that is horrible ! what do you do now ?	最悪だ今度は何をする ？	n
person 1	i drive for user and left .	ユーザーと左だ	n
person 2	that sounds interesting . what do you do in your free time ?	面白いわね自由時間は何をしてるの ？	n
person 1	i love to read and spend time with my family . how about you ?	家族と過ごすのが好きなのあなたは ？	n
person 2	i love to go fishing . its the most peaceful thing in the world .	釣りが好きなんだ世界で一番平和なことなんだ	n
person 1	i used to love fishing , until an alligator nearly ripped my arm off .	釣りが好きだったから腕を折られるまでは	n
person 2	you just have some bad luck , do not you ?	運が悪かったんだろう ？	y
person 1	yes indeed , i feel as though i live in the final destination universe .	そうだが最終目的地に住んでいるような気がする	n
person 2	that is okay , i feel like i am a legend in a tall tale .	いいのよ私は背の高い伝説のような気がするの	n
