# Supplementary material
Source: ML conference proceedings conference paper supplement (https://aclanthology.org/2022.eval4nlp-1.9)
Supplement: SupplementaryMaterial [file 1223.xlsx]

## Sheet: Sheet1
person	source	translation	evaluation: is this a good translation?
person 1	holy crap , pistachios are so good .	なんてことだピスタチオはいい奴だ	n
person 2	i agree . where do you get them ? i love getting them when i go to the mall .	そうともモールに行くときはどこで手に入れた ？	n
person 1	at the organic food store . i do not eat fast food .	有機食品店で食べてないわ	n
person 2	that is a good way to be . are you married ?	それがいいわね結婚してるの ？	n
person 1	yes . i met him fishing a few years ago .	ええ何年も前に釣りに行ったわ	n
person 2	that is a nice story . i date around lots , as i have been single for a while .	それはいい話だ長い間一人でデートしてきた	n
person 1	what do you do for fun ? i love racing go carts .	何を楽しんでるんだ ？	n
person 2	i mainly go to the mall for fun . do you have any pets ?	ショッピングモールに行って楽しんできてペットはいる ？	n
person 1	i have two cats , alice and dylan .	私には猫が ２ 匹いるのよ	n
person 2	that is adorable ! i have a little pug , his name is corky .	可愛い子ねかわいいわね彼の名前はキャップよ	n
person 1	do you play any instruments ? i love my guitar .	ギターの演奏は大好きだ	n
person 2	actually , i have been completely deaf since birth . the guitar seems cool , though .	生まれてからずっと耳が聞こえてきたがギターはイケてるようだ	n
person 1	wow , i had no idea !	（ 吉森 ） 知らなかった ！ ー	n
person 2	at least i can type , haha ! what do you do for work ?	少なくとも仕事は何の用だ ？	n
person 1	i putz around online for simple jobs .	簡単な仕事のためにネットを調べてるんだ	n
person 2	i do the same thing , though i think it would be awesome to work in the mall .	同じことをしてるけどモールで働くのは最高だと思うわ	n
