# Supplementary material
Source: ML conference proceedings conference paper supplement (https://aclanthology.org/2022.eval4nlp-1.9)
Supplement: SupplementaryMaterial [file 1223.xlsx]

## Sheet: Sheet1
person	source	translation	evaluation: is this a good translation?
person 1	holy crap , pistachios are so good .	やばい、ピスタチオめちゃ美味しい！	y
person 2	i agree . where do you get them ? i love getting them when i go to the mall .	同感。どこで買ったの？私はショッピングセンターに行った時に買ってくるのが好き。	y
person 1	at the organic food store . i do not eat fast food .	オーガニック食品店でよ。私はファーストフードは食べないの。	y
person 2	that is a good way to be . are you married ?	それが手っ取り早い方法ね。結婚してる人？	y
person 1	yes . i met him fishing a few years ago .	そうよ。彼とは何年か前に釣りで出会ったの。	y
person 2	that is a nice story . i date around lots , as i have been single for a while .	それは素敵なお話ね。私はここんところしばらく彼氏がいなくて、いろんな人とデートしてるわ。	y
person 1	what do you do for fun ? i love racing go carts .	何して遊んでる？私はゴーカートでレースするのが大好き。	y
person 2	i mainly go to the mall for fun . do you have any pets ?	私はもっぱらショッピングセンターに行って遊んでるよ。何かペット飼ってる？	y
person 1	i have two cats , alice and dylan .	猫が2匹いて、アリスとディランなの。	y
person 2	that is adorable ! i have a little pug , his name is corky .	かわいいー！うちにはちっちゃいパグがいて、コーキーっていうんだよ。	y
person 1	do you play any instruments ? i love my guitar .	何か楽器やってる？私はギター大好き。	y
person 2	actually , i have been completely deaf since birth . the guitar seems cool , though .	実はね、生まれた時から耳が全く聴こえないの。ギターってカッコいいと思うけどね。	y
person 1	wow , i had no idea !	うわぁ、全然わからなかった！	y
person 2	at least i can type , haha ! what do you do for work ?	少なくとも文字を打つことはできるからね（笑）！お仕事は？	y
person 1	i putz around online for simple jobs .	ネットでだらだら単純作業してるわ。	y
person 2	i do the same thing , though i think it would be awesome to work in the mall .	私もおんなじことしてる。でもショッピングセンターで働けたらステキなんだけどなぁ。	y
