# Supplementary material
Source: ML conference proceedings conference paper supplement (https://aclanthology.org/2022.eval4nlp-1.9)
Supplement: SupplementaryMaterial [file 1224.xlsx]

## Sheet: Sheet1
person	source	translation	evaluation: is this a good translation?
person 1	hi there . how are you tonight ?	今晩はどうだ ？	n
person 2	i am alright , how are you ?	大丈夫ですか ？	n
person 1	i am good . studying for class monday .	いいわ授業の勉強があるの	n
person 2	what are you studying ? i actually finished college this last year .	去年大学を卒業した	n
person 1	i am going for business administration .	私は政府の仕事をしています	n
person 2	that sounds like a lot of work . i tend to a farm , personally .	まるで仕事のようだ個人的に農場になりたい	n
person 1	are you in a relationship ?	君は関係あるのか ？	n
person 2	no , but i keep busy hanging out with my 3 siblings . are you ?	いや、でも ３ 人の兄弟とは忙しいんだ	n
person 1	i have been dating this girl , luis , for a few months .	彼女とデートしてきたのは ２ ， ３ ヶ月だ	n
person 2	that is interesting . where did you meet ?	面白いわねどこで会ったの ？	n
person 1	we met at school . we both drive mustangs .	学校で出会ったの二人とも運転手よ	n
person 2	awesome ! i am a little afraid of cars , as i lost my arm in an accident .	車が怖い事故で腕がなくて	n
person 1	oh , then i would be too .	私もそう思うわ	n
person 2	at least i still have my humor though , haha . do you have any siblings ?	まだユーモアがあるんだ兄弟はいるか ？	n
person 1	i have an older sister .	妹がいるんだ	n
person 2	are you the youngest ? i am .	あなたは最年少の妹ですか ？	n
