# Supplementary material
Source: ML conference proceedings conference paper supplement (https://aclanthology.org/2022.eval4nlp-1.9)
Supplement: SupplementaryMaterial [file 1224.xlsx]

## Sheet: Sheet1
person	source	translation	evaluation: is this a good translation?
person 1	hi there . how are you tonight ?	こんばんは。調子はどう？	y
person 2	i am alright , how are you ?	いいわよ。そっちは調子どう？	y
person 1	i am good . studying for class monday .	いいよ。月曜の授業に向けて勉強中。	y
person 2	what are you studying ? i actually finished college this last year .	何を勉強してるの？実を言うと、私は去年大学を卒業したの。	y
person 1	i am going for business administration .	僕は経営管理を目指してる。	y
person 2	that sounds like a lot of work . i tend to a farm , personally .	それは大変そうね。私自身は農場の管理をしてるわ。	y
person 1	are you in a relationship ?	付き合ってる人はいる？	y
person 2	no , but i keep busy hanging out with my 3 siblings . are you ?	いいえ。でも、姉たち3人とは遊びまくってるよ。そっちは？	y
person 1	i have been dating this girl , luis , for a few months .	ルイスって子と何か月か付き合ってる。	y
person 2	that is interesting . where did you meet ?	興味深いわね。どこで知り合ったの？	y
person 1	we met at school . we both drive mustangs .	学校でさ。僕ら二人ともムスタングに乗ってるんだ。	y
person 2	awesome ! i am a little afraid of cars , as i lost my arm in an accident .	カッコいいー！私ね、事故で腕を失くしちゃったから、ちょっと車が怖くって。	y
person 1	oh , then i would be too .	えー、そうなったら僕も怖くなるだろうなぁ。	y
person 2	at least i still have my humor though , haha . do you have any siblings ?	少なくとも私にはまだユーモアがあるけどね（笑）。きょうだいはいるの？	y
person 1	i have an older sister .	姉がひとりいるよ。	y
person 2	are you the youngest ? i am .	キミが一番年下？私はそうなんだけど。	y
