# Supplementary material
Source: ML conference proceedings conference paper supplement (https://aclanthology.org/2022.eval4nlp-1.9)
Supplement: SupplementaryMaterial [file 1230.xlsx]

## Sheet: Sheet1
person	source	translation	evaluation: is this a good translation?
person 1	hi , how is your evening going ?	こんばんは。今夜の調子はどう？	y
person 2	its going well ! just got back from my family dinner we have every thursday	順調よ！毎週木曜の家族との食事会から戻ってきたばかりなの。	y
person 1	that sounds like so much fun ! i really enjoy family time !	それはとっても楽しそう！家族と一緒に過ごす時間って、心底楽しいわ！	y
person 2	totally ! i have their whole support . what are you into ?	全く同感よ！家族からは全面的に協力してもらってるわ。そちら、趣味は？	y
person 1	i love to cook . i try to every night . i also coach cheer .	料理が大好き。毎晩料理するようにしてるわ。チアのコーチもしてるのよ。	y
person 2	oh wow ! i always wanted to cheer , but decided on dance instead	わー、凄い！私ね、ずっとチアをやりたいって思ってたんだけど、その代わり踊ることに決めたの。	y
person 1	i bet if you tried to get into it you would do so well !	あなたがダンスにハマってみたら、きっとすごくうまくなるでしょうね！	y
person 2	well my mom was a ballerina studied at julliard i felt pressured for dance	それがね、うちの母親がジュリアードで学んだ元バレリーナで、私は踊りに対してプレッシャーを感じてたの。	y
person 1	wow she must be an amazing dancer . do you enjoy dance ?	すごい。お母様はきっと素晴らしいダンサーなんでしょうね。踊るのは楽しい？	y
person 2	yes , she has tried to teach me everything she knows . my feet are so ugly	ええ、母は自分が知ってることを全部私に教えようとしてくれていたわ。私の足、とっても醜いの。	n
person 1	dancing takes its toll . especially ballet . way to keep dancing !	ダンスって負担がかかるものよね。特にバレエは。踊るの、頑張ってね！	n
person 2	thank you ! do you coach little cheerleaders or older ones ?	ありがとう！あなたはちっちゃいチアガールの子たちのコーチをしてるの？それとももっと大きい人たちの？	y
