# Supplementary material
Source: ML conference proceedings conference paper supplement (https://aclanthology.org/2022.eval4nlp-1.9)
Supplement: SupplementaryMaterial [file 1230.xlsx]

## Sheet: Sheet1
person	source	translation	evaluation: is this a good translation?
person 1	hi , how is your evening going ?	今晩はどうだった ？	n
person 2	its going well ! just got back from my family dinner we have every thursday	家族の夕食から戻ってきたばかりなのに	n
person 1	that sounds like so much fun ! i really enjoy family time !	楽しそうだわ家族を楽しんでるわ	n
person 2	totally ! i have their whole support . what are you into ?	みんなの支持を得たわ何に入ってるの ？	n
person 1	i love to cook . i try to every night . i also coach cheer .	毎晩料理が好きだしコーチも喜ぶし	n
person 2	oh wow ! i always wanted to cheer , but decided on dance instead	いつだって幸せになりたかったけどダンス以外はね	n
person 1	i bet if you tried to get into it you would do so well !	上手くいくと思うわよ ！	n
person 2	well my mom was a ballerina studied at julliard i felt pressured for dance	母はダンスの勉強をしていたの	n
person 1	wow she must be an amazing dancer . do you enjoy dance ?	彼女は素晴らしいダンサーだ楽しんでるか ？	n
person 2	yes , she has tried to teach me everything she knows . my feet are so ugly	彼女は私に全てを教えてくれた私の足は醜い	n
person 1	dancing takes its toll . especially ballet . way to keep dancing !	特に踊る方法はない特にダンスを続ける方法はない	n
person 2	thank you ! do you coach little cheerleaders or older ones ?	ありがとうチアリーダーのチアリーダーかい ？	n
