# Supplementary material
Source: ML conference proceedings conference paper supplement (https://aclanthology.org/2022.eval4nlp-1.9)
Supplement: SupplementaryMaterial [file 1232.xlsx]

## Sheet: Sheet1
person	source	translation	evaluation: is this a good translation?
person 1	hi , what are you up to ?	こんにちは。今、何してるの？	y
person 2	i just finished some volunteer work	ボランティア活動をちょうど終えたところよ。	y
person 1	how nice ! where do you volunteer ?	素晴らしいね！どこでボランティアしてるの？	y
person 2	i volunteer with the salvation army . what do you do for fun ?	救世軍でよ。楽しみは何？	y
person 1	i am honestly such a homebody . i love to read .	正直なところ、すんごい出不精でね。読書が大好きなの。	y
person 2	there is nothing wrong with that . i enjoy stay at home too	それってなんにも悪いことじゃないわ。私も家に居るのが楽しいし。	y
person 1	i love cold weather , curling up with a good book and coffee .	僕は寒い日に、良書とコーヒーを抱えて丸くなるのが好きだなぁ。	y
person 2	sounds , like a great day . i like to watch gene wilder movies	最高の一日って感じね。私はジーン・ワイルダーの映画を観るのが好き。	y
person 1	winter is my favorite time of year . oh i am not familiar with him .	冬が１年の中で一番好き。え、その人のことは知らないなぁ。	y
person 2	he is a comedian from the seventies	70年代の喜劇俳優よ。	y
person 1	cool ! i will have to check out his work .	いいね！彼の作品をチェックしないといけないな。	y
person 2	what do you do for a living ?	お仕事は何してるの？	y
person 1	i am a writer for a local newspaper . my parents are not impressed .	地元の新聞社のライター。両親は関心してないけどね。	y
person 2	i am sorry to hear that about your parents . i think writing is a great profession .	ご両親のことは残念ね。文章を書くのって素晴らしい職業だと私は思うよ。	y
