# Supplementary material
Source: ML conference proceedings conference paper supplement (https://aclanthology.org/2022.eval4nlp-1.9)
Supplement: SupplementaryMaterial [file 1232.xlsx]

## Sheet: Sheet1
person	source	translation	evaluation: is this a good translation?
person 1	hi , what are you up to ?	やあどうしたんだ ？	y
person 2	i just finished some volunteer work	私はただいくつかのボランティアを終えただけだ	y
person 1	how nice ! where do you volunteer ?	どうやって志願したんだ ？	n
person 2	i volunteer with the salvation army . what do you do for fun ?	救難軍と志願したんだ何を楽しんでる ？	n
person 1	i am honestly such a homebody . i love to read .	正直に言って家の中は好きなんだ	n
person 2	there is nothing wrong with that . i enjoy stay at home too	それも悪くない家でも楽しんでいるよ	y
person 1	i love cold weather , curling up with a good book and coffee .	天気も良い本とコーヒーの本も好きだし	n
person 2	sounds , like a great day . i like to watch gene wilder movies	素晴らしい一日になりそうだ遺伝子映画を見たいんだ	n
person 1	winter is my favorite time of year . oh i am not familiar with him .	冬は最高の時だ彼とは会ったことがない	n
person 2	he is a comedian from the seventies	彼は換気口からコメディアンだ	n
person 1	cool ! i will have to check out his work .	彼の仕事を調べる必要がある	n
person 2	what do you do for a living ?	何のために生活してるの ？	n
person 1	i am a writer for a local newspaper . my parents are not impressed .	地元新聞の作家です両親は印象的ではありません	n
person 2	i am sorry to hear that about your parents . i think writing is a great profession .	ご両親の記事は素晴らしい職業だと思います	n
