# Supplementary material
Source: ML conference proceedings conference paper supplement (https://aclanthology.org/2022.eval4nlp-1.9)
Supplement: SupplementaryMaterial [file 1233.xlsx]

## Sheet: Sheet1
person	source	translation	evaluation: is this a good translation?
person 1	hi there how are you ?	元気か ？	n
person 2	i am well , how are you ?	元気ですか ？	n
person 1	i am good just reading the bible	I 'm fine I' m fine a t the Fble.	n
person 2	can not go wrong with the bible . what do you do for a living ?	Don 't g o with the inble with a living for a lives?	n
person 1	i have a jewelry boutique , and you ?	宝石を持ってきたのはあなたとあなた ？	n
person 2	secretary at a law firm	法律事務所の秘書です	n
person 1	what do you do on your spare time ?	時間に何をしている ？	n
person 2	swimming and hanging out with my cats . how about you ?	俺の猫と一緒に泳いで、お前はどうだ ？	n
person 1	design jewelry or go to a craft show	宝石を設計したり船を見せたり	n
person 2	cool . can you make an orange necklace ? that my fave color	オレンジのネックレスを作ってくれる ？	n
person 1	yes i can make any color simple or bold look	はい単純に色を変えられます	n
person 2	i like bold and daring	勇気と大胆さが好きなんだ	y
person 1	do you like trying new things ?	新しいものが好きなの ？	y
person 2	absolutely . i will try anything once	絶対に何でもするわ	n
person 1	lucky i get scared last minute	最後の瞬間を恐れていて幸運だった	n
person 2	you can not be scared , step out of faith . everything will be fine	あなたは恐れないでください信頼から離れてくださいすべてがうまくいくでしょう	n
