# Supplementary material
Source: ML conference proceedings conference paper supplement (https://aclanthology.org/2022.eval4nlp-1.9)
Supplement: SupplementaryMaterial [file 1233.xlsx]

## Sheet: Sheet1
person	source	translation	evaluation: is this a good translation?
person 1	hi there how are you ?	こんにちは。調子はいかが？	y
person 2	i am well , how are you ?	いいわよ。そちらは？	y
person 1	i am good just reading the bible	元気よ。聖書を読んでるだけなの。	y
person 2	can not go wrong with the bible . what do you do for a living ?	聖書なら間違いないわね。お仕事は何？	y
person 1	i have a jewelry boutique , and you ?	ジュエリーショップをやってるの。そちらは？	y
person 2	secretary at a law firm	法律事務所の秘書。	y
person 1	what do you do on your spare time ?	暇な時には何してる？	y
person 2	swimming and hanging out with my cats . how about you ?	泳いだり、猫と一緒に過ごしてる。そちらは？	y
person 1	design jewelry or go to a craft show	ジュエリーのデザインをするか、クラフト展に行くわ。	y
person 2	cool . can you make an orange necklace ? that my fave color	いいね。オレンジ色のネックレスって作れる？私の一番好きな色なの。	n
person 1	yes i can make any color simple or bold look	ええ、どんな色のでも作れるわよ。シンプルなスタイルでも大胆なスタイルでも。	y
person 2	i like bold and daring	私は大胆で斬新なのが好みだわ。	y
person 1	do you like trying new things ?	新しいものを試すのが好きなの？	y
person 2	absolutely . i will try anything once	その通りよ。なんでも一度は試してみるの。	y
person 1	lucky i get scared last minute	ラッキーだわ。私なんて最後の最後で怖気づいちゃうのよねぇ。	y
person 2	you can not be scared , step out of faith . everything will be fine	ビビってなんていないで、信念から脱却するの。なんでもうまくいくわよ。	y
