# Supplementary material
Source: ML conference proceedings conference paper supplement (https://aclanthology.org/2022.eval4nlp-1.9)
Supplement: SupplementaryMaterial [file 1236.xlsx]

## Sheet: Sheet1
person	source	translation	evaluation: is this a good translation?
person 1	good morning new friend how is your day so far ?	おはようー！今のところ、調子はどう？	y
person 2	morning , my computer is lagging its not a morning person i guess	おはよう。うちのパソコンが遅くってさ。こいつ朝型じゃないんだと思うんだよね。	y
person 1	i work in a coffee shop but we have no coffee for computers unfortunately	私はカフェ勤務だけど、残念ながらパソコン用のコーヒーは置いてないわ。	y
person 2	ll it may need an upgrade . what is your favorite season ?	ハハハ。こいつ、アップグレードが必要なのかも。キミの一番好きな季節は？	y
person 1	spring . i love when everything starts waking up	春よ。何もかもが目覚め始める時が大好き。	y
person 2	i love fall but my favorite month is april because i like being in the rain	俺は秋が大好きだけど、雨の中にいるのが好きだから、一番好きな月は4月。	y
person 1	april here means tornadoes . its still probably the best month weather wise	こっちの4月といえば竜巻よ。それでもたぶん気候的には一番いい月ね。	y
person 2	i am sorry tornadoes are horrible	悪いが竜巻ってのは恐ろしいな。	y
person 1	i saw one in person once . once was enough	私、一回だけ実際に見たことがあるわ。一度でもうたくさんよ。	y
person 2	that can be a traumatizing thing to watch .	見ちゃうとトラウマになるかもね。	y
person 1	fortunately it was a very small tornado	ありがたいことに、とってもちっちゃい竜巻だった。	y
person 2	that is good . do you know how to get glasses clean ?	そりゃよかった。眼鏡をきれいにする方法って知ってる？	y
person 1	no i only wear contacts , do you have any tips for that ?	いいえ、私はコンタクトしか付けないんだけど、何か秘訣ある？	y
person 2	no nothing i try seems to help	いいや、何をやってもうまくいかないみたいで。	y
