# Supplementary material
Source: ML conference proceedings conference paper supplement (https://aclanthology.org/2022.eval4nlp-1.9)
Supplement: SupplementaryMaterial [file 1236.xlsx]

## Sheet: Sheet1
person	source	translation	evaluation: is this a good translation?
person 1	good morning new friend how is your day so far ?	おはようございますご機嫌いかがですか ？	n
person 2	morning , my computer is lagging its not a morning person i guess	おはようコンピュータは朝じゃないと思うけど	n
person 1	i work in a coffee shop but we have no coffee for computers unfortunately	コーヒーショップで働いてるけど残念なことにコーヒーはないわ	n
person 2	ll it may need an upgrade . what is your favorite season ?	成績が必要かもしれませんが好きなシーズンは ？	n
person 1	spring . i love when everything starts waking up	春が昇り始めたときは大好きよ	n
person 2	i love fall but my favorite month is april because i like being in the rain	私は落ちるのが好きだけど私は雨の中が好きなんだから	n
person 1	april here means tornadoes . its still probably the best month weather wise	ここではシーシャはここでは最高の天気だから	n
person 2	i am sorry tornadoes are horrible	ごめんなさい竜巻は恐ろしいわ	y
person 1	i saw one in person once . once was enough	一度だけ会ったことがある一度だけ	n
person 2	that can be a traumatizing thing to watch .	それはトラウマになるかもしれません	n
person 1	fortunately it was a very small tornado	幸運だったわね	n
person 2	that is good . do you know how to get glasses clean ?	メガネをきれいにする方法を知ってるのか ？	n
person 1	no i only wear contacts , do you have any tips for that ?	接触だけでなくチップはあるか ？	n
person 2	no nothing i try seems to help	何もしてないようだ	n
