# Supplementary material
Source: ML conference proceedings conference paper supplement (https://aclanthology.org/2022.eval4nlp-1.9)
Supplement: SupplementaryMaterial [file 1237.xlsx]

## Sheet: Sheet1
person	source	translation	evaluation: is this a good translation?
person 1	hey there , how are you ?	やあ元気かい ？	y
person 2	hi i am doing well . just finished with my nightly meditation .	元気にしてるよ腕の洗浄が終わったんだ	n
person 1	that is great . how long have you done that ?	それはよかったどれくらいかかるの ？	n
person 2	i have been doing it for over a year now . i also do yoga every day .	１ 年以上もやってきたんだ毎日もヨガもやってるんだ	n
person 1	cool . listening to music is like meditation for me	いい曲だな俺のために賞をもらったようにな	n
person 2	what do you like to listen to ?	何を聞きたい ？	n
person 1	almost anything , keeps it interesting . probably listen 5 hours a day lol	もっと面白いことがあって多分 5 時間くらいだ	n
person 2	wow ! what do you do for work ?	お仕事は何をしてるの ？	y
person 1	work from home . customer service calls . how about you ?	お客から電話があってお客さんは ？	n
person 2	i work at a marketing firm , but i am trying to start my own online business .	ネットの仕事を始めてるんだが	n
person 1	nice , good luck ! what do your parents think of that ?	頑張ってご両親はどう思う ？	n
person 2	my parents are very supportive , even of my vegan lifestyle .	両親はとても優しくて私のライバルのライバルでさえ支えられています	n
person 1	you are a really healthy person , physically and mentally it sounds like	あなたは本当に健康な人で精神的で精神的な人で精神的なのね	n
person 2	i try my best to take care of my body .	体の世話をしようと努力してるんだ	y
