# Supplementary material
Source: ML conference proceedings conference paper supplement (https://aclanthology.org/2022.eval4nlp-1.9)
Supplement: SupplementaryMaterial [file 1237.xlsx]

## Sheet: Sheet1
person	source	translation	evaluation: is this a good translation?
person 1	hey there , how are you ?	こんばんは。調子はどう？	y
person 2	hi i am doing well . just finished with my nightly meditation .	こんばんは。元気よ。ちょうど毎晩やってる瞑想が終わったところなの。	y
person 1	that is great . how long have you done that ?	いいね。それ、どれぐらいやってるの？	y
person 2	i have been doing it for over a year now . i also do yoga every day .	1年以上になるわね。ヨガも毎日してるの。	y
person 1	cool . listening to music is like meditation for me	いいね。音楽鑑賞が僕にとっては瞑想みたいなもんだな。	y
person 2	what do you like to listen to ?	何を聴くのがお好き？	y
person 1	almost anything , keeps it interesting . probably listen 5 hours a day lol	ほとんど何でも聴くから飽きないんだ。たぶん1日5時間聴いてるよ、ハハハ。	y
person 2	wow ! what do you do for work ?	凄い！お仕事は？	y
person 1	work from home . customer service calls . how about you ?	在宅なんだ。カスタマーサービスの電話。そっちは？	y
person 2	i work at a marketing firm , but i am trying to start my own online business .	マーケティングの会社に勤めてるんだけど、自分でオンライン事業を始めようとしてるの。	y
person 1	nice , good luck ! what do your parents think of that ?	いいね。頑張って！それについてご両親はどう思ってるの？	y
person 2	my parents are very supportive , even of my vegan lifestyle .	うちの両親はすごく協力的よ。私のビーガンのライフスタイルにすらね。	y
person 1	you are a really healthy person , physically and mentally it sounds like	肉体的にも精神的にも、キミって実に健康的な人みたいだね。	y
person 2	i try my best to take care of my body .	自分の身体にはできるだけ気を付けるようにしてるわ。	y
