# Supplementary material
Source: ML conference proceedings conference paper supplement (https://aclanthology.org/2022.eval4nlp-1.9)
Supplement: SupplementaryMaterial [file 1242.xlsx]

## Sheet: Sheet1
person	source	translation	evaluation: is this a good translation?
person 1	hi how are you	こんにちは。調子はどう？	y
person 2	i am doing great . just got back from yoga class . i teach at my local fitness center .	絶好調よ。ちょうどヨガ教室から戻ってきたところなの。私ね、地元のフィットネスクラブで指導してるの。	y
person 1	that sounds refreshing i just got done with a class	それは爽快だろうね。こちらは授業が終わったばかり。	y
person 2	what do you take ?	何をとってるの？	y
person 1	i am a computer engineering major	コンピュータ工学を専攻してる。	y
person 2	oh awesome ! it sounds like you know your direction in life .	わあ、凄い！自分の人生で進むべき方向がわかってるって感じね。	y
person 1	yeah , my mom is a lawyer and wanted me to follow her but i like computers more	そうだね。うちのおふくろが弁護士でさ、おふくろは僕に自分の後に続いてもらいたかったんだけど、僕はコンピュータの方が好きなもんでねぇ。	y
person 2	well we cannot always do what other people say . that would be boring !	そうね、いつも他の人の言うことを聞くことはできないし、それじゃつまらないわ！	y
person 1	that would be very boring . that is what i tell my kids sometimes .	すごくつまんないだろうね。それは自分の子供達にも時々言ってることなんだ。	y
person 2	you have kids ! i have one son . i quit after the first one . lol	子供がいるのね！うちには息子がひとり。一人目でおしまいにしたわ（笑）。	y
person 1	i have two sons and three daughters . its tough at times but rewarding	うちには息子が二人と娘が三人。時折骨が折れるけど、やりがいはある。	y
person 2	sounds like a full house .	満員って感じね。	y
person 1	yes it is but fun at times . what do you like to do in your spare time ?	そうなんだ。でも時には楽しいもんだよ。暇な時には何をするのが好き？	y
person 2	well i love the beach . i have a jar of seashells that i have collected .	えっとね、海辺が大好きなの。集めた貝殻を瓶に入れてるわ。	y
