# Supplementary material
Source: ML conference proceedings conference paper supplement (https://aclanthology.org/2022.eval4nlp-1.9)
Supplement: SupplementaryMaterial [file 1242.xlsx]

## Sheet: Sheet1
person	source	translation	evaluation: is this a good translation?
person 1	hi how are you	元気だったか ？	n
person 2	i am doing great . just got back from yoga class . i teach at my local fitness center .	私はヨガ教室から戻ってきたばかり地元の保育園地で教えてるんだ	n
person 1	that sounds refreshing i just got done with a class	（ 哲希 ） 楽しそうな予習は卒業したようだな	n
person 2	what do you take ?	あなたは何を取るの ？	n
person 1	i am a computer engineering major	私はコンピューター技術者だ	n
person 2	oh awesome ! it sounds like you know your direction in life .	人生で君の方向を知ってるようだな	n
person 1	yeah , my mom is a lawyer and wanted me to follow her but i like computers more	母は弁護士で彼女の後をつけたがってたでももっとコンピューターが好きなんだ	n
person 2	well we cannot always do what other people say . that would be boring !	他の人が言うことは退屈だと思うわ	n
person 1	that would be very boring . that is what i tell my kids sometimes .	退屈なことに子供たちにも言ったわ	n
person 2	you have kids ! i have one son . i quit after the first one . lol	一人息子が一人いる最初の一人から辞めたんだ	n
person 1	i have two sons and three daughters . its tough at times but rewarding	二人の息子と三人の娘と三人の娘が困難な時もあるだがそれは大変なことだ	n
person 2	sounds like a full house .	まるで家中みたいだな	n
person 1	yes it is but fun at times . what do you like to do in your spare time ?	楽しいけど時間で何をしたいの ？	n
person 2	well i love the beach . i have a jar of seashells that i have collected .	ビーチが好きなんだ改装したばかりだ	n
