# Supplementary material
Source: ML conference proceedings conference paper supplement (https://aclanthology.org/2022.eval4nlp-1.9)
Supplement: SupplementaryMaterial [file 1243.xlsx]

## Sheet: Sheet1
person	source	translation	evaluation: is this a good translation?
person 1	hi ! how was your weekend ?	週末はどうだった ？	y
person 2	great ! spent time with my kiddos , doggies , and ate good food !	いい時間だったわおいしい食べ物も食べて	n
person 1	awesome ! french fries were all i ate this weekend . did you have any ?	今週はポテトしか食べてないんだ何かわかったか ？	n
person 2	no french fries this weekend . i love poutine , ever tried it ?	週末はポテトなし大好きだ	n
person 1	i never heard of it . what is that like ?	そんなこと聞いたことないわ	n
person 2	hmm , its basically gravy with fries . you gotta try it !	基本的にはフライドポテトと同じだ試してみてくれ ！	n
person 1	i am not good at math and bought too many french fries	数学は得意じゃないし、レンチもたくさん買ってきた。	n
person 2	are you student ? math is overrated , what i tell my kiddos ! teachers hate me !	あなたは学生なの ？ 私が嫌いな教師なのよ ！	n
person 1	yes a poor student eating french fries	（ 哲希 ） ああかわいそうな生徒がメシ食ってんだよ	n
person 2	enjoy your time being a student ! i still chat with my college friends	（ 哲希 ） お前の時間楽しんでるうちに大学の友達と話してるんだぞー	n
person 1	i hope i keep in contact with mine . we went shopping this weekend	週末買い物に行ったんだ	n
person 2	that sounds fun ! find anything good ?	楽しそうだないい物見つけたか ？	y
person 1	a sweater for the fall season	落ちた季節にセーターを着てみたいわ	n
person 2	smart ! i like to wear burgundy in fall . covers up food spills !	賢いわね銃を着水させるのは好きなの	n
person 1	that is a very pretty color . seems to be in too	とてもきれいな色だわ	n
person 2	look at me being stylish ! better tell my kiddos ! mommas got class lol	ママにも言ってあげて	n
