# Supplementary material
Source: ML conference proceedings conference paper supplement (https://aclanthology.org/2022.eval4nlp-1.9)
Supplement: SupplementaryMaterial [file 1243.xlsx]

## Sheet: Sheet1
person	source	translation	evaluation: is this a good translation?
person 1	hi ! how was your weekend ?	こんにちは。週末はどうだった？	y
person 2	great ! spent time with my kiddos , doggies , and ate good food !	よかったわよ！子供と犬と過ごして、美味しいものを食べたわ！	y
person 1	awesome ! french fries were all i ate this weekend . did you have any ?	いいね！私が週末に食べたのはフライドポテトだけよ。そっちはフライドポテト、食べた？	y
person 2	no french fries this weekend . i love poutine , ever tried it ?	今週末は食べてないわ。私はプーティンが大好きなんだけど、試したことある？	y
person 1	i never heard of it . what is that like ?	聞いたことないなぁ。どんなのなの？	y
person 2	hmm , its basically gravy with fries . you gotta try it !	うーんとね、つまりフライドポテトにグレービーソースをかけたものなの。試してみるべきよ！	y
person 1	i am not good at math and bought too many french fries	わたし、計算が苦手で、フライドポテトを買いすぎちゃうの。	y
person 2	are you student ? math is overrated , what i tell my kiddos ! teachers hate me !	学生さん？数学は過大評価されてるって、うちの子にも言ってるのよ！先生は私のこと嫌ってるわ！	y
person 1	yes a poor student eating french fries	そう、フライドポテトを食べてる貧しい学生。	y
person 2	enjoy your time being a student ! i still chat with my college friends	学生時代を楽しんでね！私は大学時代の友達と未だにチャットしてるわ。	y
person 1	i hope i keep in contact with mine . we went shopping this weekend	私も友達と連絡取り合っていけるといいな。友達とは週末に買い物に行ったの。	y
person 2	that sounds fun ! find anything good ?	楽しそうね！何かいいもの見つかった？	y
person 1	a sweater for the fall season	秋用のセーター。	y
person 2	smart ! i like to wear burgundy in fall . covers up food spills !	おしゃれ！私は秋に赤紫を着るのが好き。食べこぼしをごまかせるから！	y
person 1	that is a very pretty color . seems to be in too	あれはとってもきれいな色よね。流行っているみたいだし。	y
person 2	look at me being stylish ! better tell my kiddos ! mommas got class lol	洗練された私をご覧あれ！あなた、うちの子たちに言ってちょうだい！ママには気品があるわよってね、ハハハ！	n
