# Supplementary material
Source: ML conference proceedings conference paper supplement (https://aclanthology.org/2022.eval4nlp-1.9)
Supplement: SupplementaryMaterial [file 1255.xlsx]

## Sheet: Sheet1
person	source	translation	evaluation: is this a good translation?
person 1	what are you up to this beautiful day ?	いい天気だね、何してる？	y
person 2	dong some review on movies and about ready to go out and eat with the family ?	映画のレビューを書いてて、そろそろ出掛けて家族と食事するところだけど？	y
person 1	just taking some time off of my farm duties	僕は農場の仕事をしばらく休んでいるところなんだ。	y
person 2	where do you live ? i love taking drives out to the country its beautiful !	どこに住んでるの？私はドライブで郊外に出るの大好き。素敵よ！	y
person 1	i am in michigan . grand rapids . it is great here . you should come visit	ミシガン州在住。 グランド・ラピッズさ。いいところだよ。遊びにおいで。	y
person 2	my family is from grand rapids michigan that is funny . i live in georgia	うちの家族、ミシガン州のグランド・ラピッズ出身なのよ。ウケるー。私はジョージア州在住なんだけどね。	y
person 1	what is wrong with georgia ?	ジョージア州のどこが悪いのさ？	y
person 2	its hot and very conservative but beautiful nonetheless . you read at all ?	暑いし、とても保守的だけど、それでもいいところよ。本は読む？	y
person 1	sometimes i do . when my kids will give me enough alone time to	たまには読むよ。本を読めるだけの時間を子供達がくれればね。	y
person 2	big family ? i love going out to eat with my family	大家族？私は家族と外食するのが大好きなの。	y
person 1	only 2 kids . and a wife . so about a medium sized one	子供は二人だけ。それに奥さん。だから、だいたい標準サイズの家庭だね。	y
person 2	that is great sounds awesome ! i am living the bachelors life now while in school	ステキ。いい感じ！私は学校に通いながら、今は独身生活を楽しんでるわ。	y
person 1	hey that is great . i miss those days	おいおい、それはいいな。そんな日々が懐かしいよ。	y
person 2	its fun i mostly read books mostly books in a series i really enjoy them	楽しいわよ。私ね、大抵は本を読んでるの。主にシリーズ物の本でね。すごく楽しいわ。	y
