# Supplementary material
Source: ML conference proceedings conference paper supplement (https://aclanthology.org/2022.eval4nlp-1.9)
Supplement: SupplementaryMaterial [file 1255.xlsx]

## Sheet: Sheet1
person	source	translation	evaluation: is this a good translation?
person 1	what are you up to this beautiful day ?	この美しい日に何をしているんだ ？	y
person 2	dong some review on movies and about ready to go out and eat with the family ?	映画に出て家族と食事する準備はできたか ？	n
person 1	just taking some time off of my farm duties	仕事の邪魔をするだけだ	n
person 2	where do you live ? i love taking drives out to the country its beautiful !	どこに住んでるんだ美しい国に行くのが好きなんだ ！	n
person 1	i am in michigan . grand rapids . it is great here . you should come visit	私はミンガンにいるわあなたが来てくれて嬉しいわ	n
person 2	my family is from grand rapids michigan that is funny . i live in georgia	私の家族はグリッガンから来たの面白いわ	n
person 1	what is wrong with georgia ?	どうしたんだ ？	n
person 2	its hot and very conservative but beautiful nonetheless . you read at all ?	とても魅力的で魅力的で魅力的で美しいですがすべて読んでいますか ？	n
person 1	sometimes i do . when my kids will give me enough alone time to	時々子供が一人になると一人になります	n
person 2	big family ? i love going out to eat with my family	家族と食事に行くのが好きなんだ	n
person 1	only 2 kids . and a wife . so about a medium sized one	２ 人の子供が １ 人妻と妻が １ 人	n
person 2	that is great sounds awesome ! i am living the bachelors life now while in school	学校での生活は最高だ	n
person 1	hey that is great . i miss those days	それは良かったあの日が楽しみだ	n
person 2	its fun i mostly read books mostly books in a series i really enjoy them	本に書いてあった本にはとても楽しい本がいっぱいあった	n
