# Supplementary material
Source: ML conference proceedings conference paper supplement (https://aclanthology.org/2022.eval4nlp-1.9)
Supplement: SupplementaryMaterial [file 1262.xlsx]

## Sheet: Sheet1
person	source	translation	evaluation: is this a good translation?
person 1	hi there , tell me about yourself	こんにちは。キミのこと聞かせて。	y
person 2	hi ! i have a boring profession in an office what about you ?	こんにちは！こちらは退屈なオフィス業に就いてるわ。そちらは？	y
person 1	i actually grew up on the farm and now i work veterinarian	実は農場育ちでね、今は獣医をやってるんだ。	y
person 2	that is nice ! i love being outside , especially at national parks	ステキ！私は屋外で過ごすのが好きでね、特に国立公園が大好きなの。	y
person 1	my 2 nephews love national parks . we run there . it is so relaxing	うちの甥っ子二人が国立公園好きでね。僕らそこで走ってるんだ。とってもリラックスするよ。	y
person 2	really ? i love running ! i do it every morning .	ホント？私、走るの大好きよ!毎朝走ってるし。	y
person 1	really ? i used to run with my brother , but now he is in the army	マジで？前は兄弟で一緒に走ってたんだけど、ヤツが今軍隊にいっちゃってて。	n
person 2	i do not have any military family . what are your other hobbies ?	うちの家族には誰も軍人っていないわ。他に趣味は？	y
person 1	i do not have any other hobbies , you ?	他にはないなぁ。キミは？	n
person 2	video games are my guilty pleasure after work most nights	大抵、夜仕事の後でテレビゲームするのが、私のやめられない密かな楽しみなの。	y
person 1	cool . i do not have a lot of time for video games	いいね。僕にはゲームする時間があんまりないんだよねぇ。	n
person 2	the joys of being single , i suppose	独身の歓びってやつかな。	y
person 1	i am sure you can find someone !	きっと誰か見つかるって！	n
person 2	thanks , i am sure i will	ありがとう。私もきっと見つかると思うわ。	y
