# Supplementary material
Source: ML conference proceedings conference paper supplement (https://aclanthology.org/2022.eval4nlp-1.9)
Supplement: SupplementaryMaterial [file 1262.xlsx]

## Sheet: Sheet1
person	source	translation	evaluation: is this a good translation?
person 1	hi there , tell me about yourself	自分のことを話してくれないか ？	y
person 2	hi ! i have a boring profession in an office what about you ?	退屈な仕事があるんだ君は ？	n
person 1	i actually grew up on the farm and now i work veterinarian	農場で育って今は仕事をしてる	n
person 2	that is nice ! i love being outside , especially at national parks	素敵だわ特に外は好きなのよ特に田舎の外でね	n
person 1	my 2 nephews love national parks . we run there . it is so relaxing	甥二人のアメリカ人が大好きなんだそこを走ってるから落ち着いて	n
person 2	really ? i love running ! i do it every morning .	本当に逃げたいんだ朝までやってるんだ	n
person 1	really ? i used to run with my brother , but now he is in the army	兄と一緒に走ってきたけど今は軍隊にいるわ	n
person 2	i do not have any military family . what are your other hobbies ?	私には軍隊がない他には何がある ？	n
person 1	i do not have any other hobbies , you ?	他に誰もいないよな ？	n
person 2	video games are my guilty pleasure after work most nights	ビデオゲームは最高の夜の後の夜が終わってからの罪だ	n
person 1	cool . i do not have a lot of time for video games	俺はビデオゲームにはあまり時間がないんだ	n
person 2	the joys of being single , i suppose	楽しいだろうが	n
person 1	i am sure you can find someone !	誰かを見つけられるわよ ！	y
person 2	thanks , i am sure i will	ありがとう、きっと	n
