# Supplementary material
Source: ML conference proceedings conference paper supplement (https://aclanthology.org/2022.eval4nlp-1.9)
Supplement: SupplementaryMaterial [file 1267.xlsx]

## Sheet: Sheet1
person	source	translation	evaluation: is this a good translation?
person 1	jefferson here , just finished reading another book .	ジェファソン他の本を読んでくれ	n
person 2	hey there , i am mary cool , i like to read but work alot	俺は冷静だが読んでみたいんだ	n
person 1	oh , i work a fair bit at a doctors office .	医者に診てもらったんだ	n
person 2	hey me to ! what do you do ?	どうするんだ ？	n
person 1	just a bunch of paperwork mostly . it helps me keep my mind off being single .	書類がたくさんあるから一人にしないでくれ	n
person 2	i am a receptionist , i understand that	私は自己紹介者です	n
person 1	someone brought in some flowers the other day . i think my favorite was the lily .	ある日花を持ってきた人が好きだったと思います	n
person 2	o yeah that is sweet , i am in college fulltime as well	（ 静流の声 ） そうだね静流も大学時代にいるんだから	n
person 1	wow , you must not have much free time !	時間がないんじゃないの ？	y
person 2	none haha , i spend most weekends studying and looking at client files	残念だけど私は依頼人のファイルを見て勉強してるんだ	n
person 1	what are you studying in college ?	大学で何を勉強してるの ？	y
person 2	i want to be a nurse	私は看護師になりたい	y
person 1	that is great , helping people is a noble thing .	それは素晴らしい人を助けることは高貴なことなんだ	n
person 2	yes i love this industry	この業界が好きなんだ	y
person 1	do you have any hobbies ?	あなたは、いくつかのホップを持っていますか ？	n
person 2	yes i love movies when i get a breather	はい、私が息をするときに映画が大好きです	n
