# Supplementary material
Source: ML conference proceedings conference paper supplement (https://aclanthology.org/2022.eval4nlp-1.9)
Supplement: SupplementaryMaterial [file 1267.xlsx]

## Sheet: Sheet1
person	source	translation	evaluation: is this a good translation?
person 1	jefferson here , just finished reading another book .	こちら、ジェファーソン。ちょうどまた一冊本を読み終えたところなんだ。	y
person 2	hey there , i am mary cool , i like to read but work alot	こんにちは。メアリーよ。すごい。本を読むのは好きだけど、仕事が大変で。	y
person 1	oh , i work a fair bit at a doctors office .	えー、僕だって診療所でかなり働いてるよ。	y
person 2	hey me to ! what do you do ?	まあ、私もよ！何をしてるの？	y
person 1	just a bunch of paperwork mostly . it helps me keep my mind off being single .	主に一連の事務作業ってだけ。独身の気を紛らわすのには役立ってる。	y
person 2	i am a receptionist , i understand that	私は受付だし、それわかるなぁ。	y
person 1	someone brought in some flowers the other day . i think my favorite was the lily .	この前、誰かが花を持って来たことがあってね。なかでも僕の一番好きな花はユリだったかな。	y
person 2	o yeah that is sweet , i am in college fulltime as well	へぇ、そうなの。それは素敵ね。私は大学にもフルタイムで通ってるのよ。	y
person 1	wow , you must not have much free time !	凄いね。自由な時間なんてあんまりないんだろうな！	y
person 2	none haha , i spend most weekends studying and looking at client files	全然ないわ（笑）。週末は大抵勉強したり、顧客ファイルに目を通したりして過ごしてるの。	y
person 1	what are you studying in college ?	大学では何を勉強してるの？	y
person 2	i want to be a nurse	私ね、看護師になりたいの。	y
person 1	that is great , helping people is a noble thing .	それは素晴らしいね。人を助けることは立派なことだよ。	y
person 2	yes i love this industry	そうよね。私はこの業界が気に入ってるわ。	y
person 1	do you have any hobbies ?	なんか趣味ある？	y
person 2	yes i love movies when i get a breather	ええ、息抜きに映画を観るのが大好きなの。	y
