# Supplementary material
Source: ML conference proceedings conference paper supplement (https://aclanthology.org/2022.eval4nlp-1.9)
Supplement: SupplementaryMaterial [file 1270.xlsx]

## Sheet: Sheet1
person	source	translation	evaluation: is this a good translation?
person 1	hello how are you doing today	こんにちは。調子はどう？	y
person 2	hi i am doing good how are you	こんにちは。調子いいわ。そっちは？	y
person 1	i am great i am cleaning and i hate it	元気だよ。掃除してるんだけどさ、掃除なんて大嫌いで。	y
person 2	i do not like cleaning either . i have to study for a test tonight i hope i pass	私も掃除は好きじゃないわ。私ね、テストに向けて今夜勉強しなきゃいけないの。合格できたらいいなー。	y
person 1	i love to paint and only with water colors	私はね、絵を描くのが大好きで、水彩画限定なの。	y
person 2	what kind of things do you like to paint	どんな絵を描くのが好き？	y
person 1	pictures children and things that are pretty	肖像画とか子供とか可愛らしいものとかだよ。	y
person 2	you must be very talented	才能あるんでしょうね。	y
person 1	well thank you for saying that	ま、そう言ってくれてありがとね。	y
person 2	do you like disney movies ? i love them	ディズニー映画は好き？私は大好き！	y
person 1	yes i do what is your favorite color	好きだよ。キミの一番好きな色は？	y
person 2	i like blue my favorite disney princess is ariel .	青が好き。ディズニーのプリンセスで一番好きなのはアリエルよ。	y
person 1	mine is blue also and mine is cinderella	私の一番好きな色も青で、私はシンデレラだな。	y
person 2	wow we have stuff in common . that is great . i have a dance competition this weekend .	凄い、共通点あり！ステキだわ。私ね、今週末ダンスのコンテストがあるんだー。	y
person 1	well good luck i hope you do great	ま、頑張ってね！活躍を期待してるよ。	y
person 2	thank you ! what do you do for fun	ありがとう！あなたの楽しみって何？	y
