# Supplementary material
Source: ML conference proceedings conference paper supplement (https://aclanthology.org/2022.eval4nlp-1.9)
Supplement: SupplementaryMaterial [file 1270.xlsx]

## Sheet: Sheet1
person	source	translation	evaluation: is this a good translation?
person 1	hello how are you doing today	こんにちは今日は	n
person 2	hi i am doing good how are you	元気ですか ？	n
person 1	i am great i am cleaning and i hate it	掃除と嫌いなんです	n
person 2	i do not like cleaning either . i have to study for a test tonight i hope i pass	私も掃除は嫌い今夜は試験の勉強をしないと	n
person 1	i love to paint and only with water colors	色と水だけが好きなの	n
person 2	what kind of things do you like to paint	♪ What d o like you like t o paint t o paint ♪	n
person 1	pictures children and things that are pretty	子供たちの写真と写真は素敵だ	n
person 2	you must be very talented	あなたは非常に才能があるなければなりません	n
person 1	well thank you for saying that	それを言うことに感謝します	n
person 2	do you like disney movies ? i love them	映画は嫌いなの ？	n
person 1	yes i do what is your favorite color	はい、私はあなたの好きな色をしています	n
person 2	i like blue my favorite disney princess is ariel .	私は青の王女が好きな青の王女が好きです	n
person 1	mine is blue also and mine is cinderella	私のブルーでも私のは青でもあるし	n
person 2	wow we have stuff in common . that is great . i have a dance competition this weekend .	週末は競争相手がいるんだ	n
person 1	well good luck i hope you do great	頑張ってね	y
person 2	thank you ! what do you do for fun	ありがとう楽しんできて	n
