# Supplementary material
Source: ML conference proceedings conference paper supplement (https://aclanthology.org/2022.eval4nlp-1.9)
Supplement: SupplementaryMaterial [file 1276.xlsx]

## Sheet: Sheet1
person	source	translation	evaluation: is this a good translation?
person 1	hey there , friend ! is it starting to get cold where you are ?	こんにちは！そっちは寒くなってきてる？	y
person 2	hello there ! i just got back from walking my dog and it is fairly warm here	こんにちは！犬の散歩からちょうど戻ったところなんだけど、こっちはかなり暖かいよ。	y
person 1	that is cool . i think animals are the best .	いいね。動物って最高だと思う。	y
person 2	me too ! tell me a little about yourself , do you have any hobbies ?	同感！あなたのことちょっと聞かせてよ。なんか趣味ある？	y
person 1	i like listening to country music and working on my farm .	僕はカントリーミュージックを聴くのと、農場で作業するのが好き。	y
person 2	i want to move to the country after i graduate from college in 2019	2019年に大学を卒業したら、私は郊外に引っ越したいんだー。	y
person 1	what are you going to school for ?	学校に通ってるのは何のため？	y
person 2	civil engineering , i like school a lot but i am very ready to graduate !	土木工学のためよ。学校は大好きだけど、卒業する準備は既に万端なの！	y
person 1	do you like to dance to country music ?	カントリーミュージックで踊るのは好き？	y
person 2	yes i do ! my parents used to belong to a line dancing group before they divorced	ええ、好きよ。うちの両親ね、離婚する前はラインダンスのグループに入ってたのよ。	y
person 1	i throw parties in my barn where we line dance every month .	毎月うちの納屋でパーティーをひらいてて、僕らそこでラインダンスしてるんだよ。	y
person 2	that sounds so fun i would love to get back to line dancing	すごく楽しそうね。私もラインダンスを再開したいわ。	y
person 1	we usually have a big vegan spread .	僕たち大抵ビーガンのごちそうを食べてるんだ。	y
person 2	that is so unique ! veganism and line dancing usually do not mix !	とってもユニークね！菜食主義とラインダンスは普通、合わないものよ！	y
