# Supplementary material
Source: ML conference proceedings conference paper supplement (https://aclanthology.org/2022.eval4nlp-1.9)
Supplement: SupplementaryMaterial [file 1276.xlsx]

## Sheet: Sheet1
person	source	translation	evaluation: is this a good translation?
person 1	hey there , friend ! is it starting to get cold where you are ?	おい、冷たいところに戻ってきたのか ？	n
person 2	hello there ! i just got back from walking my dog and it is fairly warm here	はい、犬の散歩から戻ってきましたとても暖かいところです	n
person 1	that is cool . i think animals are the best .	それはいい動物は最高だと思うわ	y
person 2	me too ! tell me a little about yourself , do you have any hobbies ?	私も教えてくれないか自分のことを話してくれないか ？	n
person 1	i like listening to country music and working on my farm .	私はこの農場で音楽と仕事を聞きたい	n
person 2	i want to move to the country after i graduate from college in 2019	2 0 1 9 年卒業してからこの国に引っ越したい	n
person 1	what are you going to school for ?	学校はどうするの ？	n
person 2	civil engineering , i like school a lot but i am very ready to graduate !	私は多くの学校が好きですが卒業準備はできています ！	n
person 1	do you like to dance to country music ?	音楽が好きなの ？	n
person 2	yes i do ! my parents used to belong to a line dancing group before they divorced	そうよ両親は離婚前にダンスグループの一員だったの	n
person 1	i throw parties in my barn where we line dance every month .	毎年納屋で踊ってたわ	n
person 2	that sounds so fun i would love to get back to line dancing	それは楽しそうだからダンスに戻りたいんだけど	n
person 1	we usually have a big vegan spread .	いつも大きなレースがあるんだ	n
person 2	that is so unique ! veganism and line dancing usually do not mix !	それは特別なんだよいつものダンスじゃないんだ	n
