# Supplementary material
Source: ML conference proceedings conference paper supplement (https://aclanthology.org/2022.eval4nlp-1.9)
Supplement: SupplementaryMaterial [file 1277.xlsx]

## Sheet: Sheet1
person	source	translation	evaluation: is this a good translation?
person 1	hi , how are you doing ?	元気か ？	y
person 2	i am great ! how are you ?	私は素晴らしいです、あなたは ？	n
person 1	that is good , i am doing great !	いいぞやってるぞ ！	n
person 2	do you have a favorite dessert ?	デザートはありますか ？	n
person 1	yes , i having pie with my husband and children	はい夫と子供とパイを持ってきました	n
person 2	yum . i like chocolate chip cookies best .	チョコレートチップが一番好きなんです	n
person 1	chocolate chip cookies are delicious	「チョコレートチップはおいしいです」	n
person 2	i like to have a pepsi along with my cookies .	クッキーと一緒にコプシを食べたい	n
person 1	pepsi is good . i always get one on road trips .	ペプシは良い旅だいつでも旅に出る	n
person 2	i want to take my new car on a road trip soon . it is a toyota camry .	私の新しい車を早く借りたいんですが	n
person 1	i live upstate in new york and love to drive down to florida .	フロリダまでドライブが好きなんだ	n
person 2	that is a long drive , but i bet it is very scenic .	長いドライブだけど楽しみだわ	n
person 1	it is worth it . i sometimes need a break from working as a meeting coordinator	それは価値があるもし会議の時には少し休憩が必要だ	n
person 2	sounds interesting . what does a meeting coordinator do ?	面白いわね、関連者との会合は何をするの ？	n
person 1	i plan meetings for my company , it is a lot of fun	私は、会社のために会議をしている楽しいことがたくさんあります。	n
person 2	what are come of your hobbies ? i like to talk on irc .	何が起こっているのですか、あなたのブリーフィングについて話がしたい。	n
