# Supplementary material
Source: ML conference proceedings conference paper supplement (https://aclanthology.org/2022.eval4nlp-1.9)
Supplement: SupplementaryMaterial [file 1277.xlsx]

## Sheet: Sheet1
person	source	translation	evaluation: is this a good translation?
person 1	hi , how are you doing ?	こんにちは。調子はどう？	y
person 2	i am great ! how are you ?	すごくいいよ！そっちは？	y
person 1	that is good , i am doing great !	それはよかった。こちらも絶好調よ！	y
person 2	do you have a favorite dessert ?	一番好きなデザートってある？	y
person 1	yes , i having pie with my husband and children	あるわ。旦那と子供たちと一緒に食べるパイよ。	y
person 2	yum . i like chocolate chip cookies best .	美味しそう。僕はチョコチップクッキーが一番好き。	y
person 1	chocolate chip cookies are delicious	チョコチップクッキーって美味しいよね。	y
person 2	i like to have a pepsi along with my cookies .	僕はクッキーと一緒にペプシを飲むのが好き。	y
person 1	pepsi is good . i always get one on road trips .	ペプシ美味しいよね。私は車で旅行するときにいつも買ってるわ。	y
person 2	i want to take my new car on a road trip soon . it is a toyota camry .	早くうちの新しい車でドライブに行きたいな。車はね、トヨタのカムリなんだー。	y
person 1	i live upstate in new york and love to drive down to florida .	私はニューヨーク州北部に住んでて、フロリダまでドライブするのが大好きなの。	y
person 2	that is a long drive , but i bet it is very scenic .	それは長距離ドライブだね。でもきっと、すごく眺めがいいんだろうな。	y
person 1	it is worth it . i sometimes need a break from working as a meeting coordinator	価値はあるわよ。たまには会議コーディネーターの仕事から解放されたいわ。	y
person 2	sounds interesting . what does a meeting coordinator do ?	面白そうだね。会議コーディネーターって何するの？	y
person 1	i plan meetings for my company , it is a lot of fun	うちの会社のミーティングを企画するんだけど、とっても面白いわよ。	y
person 2	what are come of your hobbies ? i like to talk on irc .	趣味は何？僕はIRCで話すのが好きなんだけど。	n
