# Supplementary material
Source: ML conference proceedings conference paper supplement (https://aclanthology.org/2022.eval4nlp-1.9)
Supplement: SupplementaryMaterial [file 1285.xlsx]

## Sheet: Sheet1
person	source	translation	evaluation: is this a good translation?
person 1	hey ! how is it going ?	やあ！調子はどう？	y
person 2	its going good ! just finished playing my pss . you ?	調子はいいよ！ちょうどPSSで遊び終わったところなんだ。そっちは？	y
person 1	cool . i just got done drafting my nfl fantasy football league ? i love nfl and college football .	いいね。こっちはNFLファンタジー・フットボール・リーグのドラフトが終わったところだけど？NFLと大学のフットボールが大好きなんだ。	y
person 2	i am more into gaming than sports . it helps when your mom works for apple too .	僕はスポーツよりゲームにもっとハマってる。母親がアップル勤務だと助かるよ。	y
person 1	that is awesome . i live in georgia . where are you from ?	そりゃすごいね。こちらはジョージア州在住。そっちはどこ出身？	y
person 2	i also live in georgia . what kind of music do you listen to ?	僕もジョージア州に住んでるよ。どんな音楽聴くの？	y
person 1	i do not listen to much music . i love reading fiction books . especially sci fi and horror books .	あんまり音楽は聴かないなぁ。僕は小説を読むのが大好き。特にSF小説とホラー小説。	y
person 2	oh ok . i love rock music . its so awesome and raw .	あ、そうなんだ。僕はロック好き。ロックって最高だしめちゃカッコいい。	y
person 1	what is your favorite rock band ?	一番好きなロックバンドは？	y
person 2	i am really into this band called avatar right now . they are from sweden .	アヴァターっていうバンドにマジでハマってる。スウェーデンのバンドなの。	y
person 1	that is an interesting band . i may have to look them up .	面白そうなバンドだね。チェックした方がいいな。	y
person 2	they have this awesome circus theme when they perform . very creepy intro .	このバンドの演奏って、めっちゃイケてるサーカスをテーマにしてんの。すんごく不気味なイントロがあってさ。	y
person 1	that is kina cool .	かなりイケてるんだね。	y
person 2	what do you do ?	キミは何してる人？	y
