# Supplementary material
Source: ML conference proceedings conference paper supplement (https://aclanthology.org/2022.eval4nlp-1.9)
Supplement: SupplementaryMaterial [file 1285.xlsx]

## Sheet: Sheet1
person	source	translation	evaluation: is this a good translation?
person 1	hey ! how is it going ?	調子はどうだ ？	n
person 2	its going good ! just finished playing my pss . you ?	よかったわあなたは ？	n
person 1	cool . i just got done drafting my nfl fantasy football league ? i love nfl and college football .	サッカー選手とフットボールのフットボールが大好きだったわ	n
person 2	i am more into gaming than sports . it helps when your mom works for apple too .	ママがリンゴのために働くよりスポーツの方が好きなの	n
person 1	that is awesome . i live in georgia . where are you from ?	すごいわねどこから来たの ？	n
person 2	i also live in georgia . what kind of music do you listen to ?	私も住んでるわどんな音楽が聴こえるの ？	n
person 1	i do not listen to much music . i love reading fiction books . especially sci fi and horror books .	音楽はあまり聴きたくない特にホラー小説とホラー本が好きなんだ	n
person 2	oh ok . i love rock music . its so awesome and raw .	わかったロック大好きだよ最高の音楽と生生だ	n
person 1	what is your favorite rock band ?	あなたの好きなロックバンドは何ですか ？	y
person 2	i am really into this band called avatar right now . they are from sweden .	私はこのバンドに入っています彼らは地震から来ています	n
person 1	that is an interesting band . i may have to look them up .	面白いバンドだ見てみよう	y
person 2	they have this awesome circus theme when they perform . very creepy intro .	彼らが演奏した時は最高のサーカスのテーマだすごく不気味だ	n
person 1	that is kina cool .	それはクールです。	y
person 2	what do you do ?	あなたはどうしますか ？	n
