# Supplementary material
Source: ML conference proceedings conference paper supplement (https://aclanthology.org/2022.eval4nlp-1.9)
Supplement: SupplementaryMaterial [file 1287.xlsx]

## Sheet: Sheet1
person	source	translation	evaluation: is this a good translation?
person 1	hey how are you doing today ?	こんにちは。調子はどう？	y
person 2	i am good , how are you ?	いいわよ。そちらは？	y
person 1	i am great , just working right now !	調子いいよ。ちょうど今は仕事中！	y
person 2	same here ! what do you do for work ?	私もよ！お仕事って？	y
person 1	working in the hospital right now , do not enjoy it though	今は病院勤務。楽しんではいないんだけどね。	y
person 2	i am a meeting coordinator and i feel the same . what would you rather do ?	こっちは会議コーディネーター。私もおんなじ気持ちよ。あなたは何してたい？	n
person 1	i love cars , especially toyota so i would like to be a mechanic .	僕は車が大好きでね、特にトヨタ車が好きだから、整備士になりたいな。	y
person 2	oh that is nice ! what is the best car for road trips ?	あ、それはいいわね！車で旅行するのに一番いいのはどれ？	y
person 1	toyota corolla for sure , very reliable vehicle !	もちろんトヨタのカローラさ。とっても信頼性の高い車だよ！	y
person 2	would it be good to take all the way across country ?	全土を横断するのにいいかしら？	y
person 1	it would be for sure , or a nice truck instead .	もちろんだよ。そうでなければ、代わりに快適なトラックだね。	n
person 2	ok ! i live in florida but my absolutely love visiting seattle .	了解！私はフロリダに住んでるんだけど、シアトルに行くのが大大大好きなの。	y
person 1	seattle is beautiful , do you like baseball ?	シアトルはきれいだよね。野球は好き？	y
person 2	my husband and my two boys and i love going to the games !	うちの旦那も息子二人も私も、試合を観に行くのが大好きよ！	y
person 1	also do not forget to vote after the game in the election !	試合の後の投票もお忘れなく！	y
person 2	have you decided who to vote for ?	誰に投票するか決めた？	y
