# Supplementary material
Source: ML conference proceedings conference paper supplement (https://aclanthology.org/2022.eval4nlp-1.9)
Supplement: SupplementaryMaterial [file 1287.xlsx]

## Sheet: Sheet1
person	source	translation	evaluation: is this a good translation?
person 1	hey how are you doing today ?	今日はどう ？	y
person 2	i am good , how are you ?	元気だよ元気か ？	y
person 1	i am great , just working right now !	今は仕事中なんだ ！	n
person 2	same here ! what do you do for work ?	同じだここで仕事は何を ？	y
person 1	working in the hospital right now , do not enjoy it though	今病院で仕事をしているが楽しくはない	n
person 2	i am a meeting coordinator and i feel the same . what would you rather do ?	私も同業者と会うのよどうしたいの ？	n
person 1	i love cars , especially toyota so i would like to be a mechanic .	車が好きなんだ特にタコタが好きなんだ	n
person 2	oh that is nice ! what is the best car for road trips ?	いいわ旅のための車は何のための最善の道なの ？	n
person 1	toyota corolla for sure , very reliable vehicle !	玉木は確かに信頼できる車だよ ！	n
person 2	would it be good to take all the way across country ?	この国を通るのはいいことだろう ？	n
person 1	it would be for sure , or a nice truck instead .	それは確かに良いトラックだ	n
person 2	ok ! i live in florida but my absolutely love visiting seattle .	フロリダに住んでいるが私の愛は絶対にカフェに来る	n
person 1	seattle is beautiful , do you like baseball ?	素敵な野球が好きなの ？	n
person 2	my husband and my two boys and i love going to the games !	夫と私の ２ 人でゲームに行きたいの ！	n
person 1	also do not forget to vote after the game in the election !	選挙の後も投票を忘れるな ！	n
person 2	have you decided who to vote for ?	誰に投票を決めたんだ ？	n
