# Supplementary material
Source: ML conference proceedings conference paper supplement (https://aclanthology.org/2022.eval4nlp-1.9)
Supplement: SupplementaryMaterial [file 1288.xlsx]

## Sheet: Sheet1
person	source	translation	evaluation: is this a good translation?
person 1	hey there . hows it going ?	ねえ、それがどうしたの ？	n
person 2	great ! i bought some new kicks and they feel great	いいわ新しいキックを買って最高に気分がいいわ	n
person 1	that is awesome ! what kind of shoes are they ?	すごい靴だなどんな靴だ ？	n
person 2	new balance . they really support my feet . i love comfy things like chairs too	私の足も支えてくれた椅子のようなものが好きなの	n
person 1	i am happy for you . i am not a huge fan of comfy things . i am more of a thrill seeker .	あなたのために私は大ファンではありません	n
person 2	what kinda thrills do you like to do	あなたは何が好きなの ？	n
person 1	i am really into skiing	本当に好きなんだよ	n
person 2	where have you skiied at ?	どこで取引したんだ ？	n
person 1	all over the us . if you can name it , i have probably been down it	みんなで名前を教えてくれたら僕は落ちてたかもしれない	n
person 2	that is cool . i love sleeping so any chance i get i take a nap	いいわ寝る前に寝るのが好きなの	n
person 1	as long as you are doing what makes you happy	あなたがしてることが幸せになる限り	n
person 2	yes this the goal in life to be happy	そうだ人生で幸せになるために	n
