# Supplementary material
Source: ML conference proceedings conference paper supplement (https://aclanthology.org/2022.eval4nlp-1.9)
Supplement: SupplementaryMaterial [file 1288.xlsx]

## Sheet: Sheet1
person	source	translation	evaluation: is this a good translation?
person 1	hey there . hows it going ?	こんにちは。調子どう？	n
person 2	great ! i bought some new kicks and they feel great	いいよ！新しいスニーカーを買ったんだけど、履き心地が良くって。	y
person 1	that is awesome ! what kind of shoes are they ?	いいね！どんな靴なの？	y
person 2	new balance . they really support my feet . i love comfy things like chairs too	ニューバランスよ。足をしっかりサポートしてくれるの。椅子とかでも快適なのが好き。	y
person 1	i am happy for you . i am not a huge fan of comfy things . i am more of a thrill seeker .	よかったね。僕は快適なものってあんまり好きじゃないなぁ。どっちかというとスリルを求めるタイプ。	y
person 2	what kinda thrills do you like to do	どんなスリルが好みなの？	y
person 1	i am really into skiing	僕はスキーにめっちゃハマってる。	y
person 2	where have you skiied at ?	どこで滑ったことあるの？	y
person 1	all over the us . if you can name it , i have probably been down it	アメリカ中のいたるところでさ。名前を挙げてくれれば、たぶん僕はそこに行ったことあると思うよ。	y
person 2	that is cool . i love sleeping so any chance i get i take a nap	凄いね。私は寝るのが大好きだから、チャンスがあれば昼寝してるわ。	y
person 1	as long as you are doing what makes you happy	自分が幸せだと思えることをしていればいいんだよ。	y
person 2	yes this the goal in life to be happy	そうよ、幸せになることが人生の目標よ。	y
