# Supplementary material
Source: ML conference proceedings conference paper supplement (https://aclanthology.org/2022.eval4nlp-1.9)
Supplement: SupplementaryMaterial [file 1290.xlsx]

## Sheet: Sheet1
person	source	translation	evaluation: is this a good translation?
person 1	howdy ! how all doing today ?	やあ！調子どう？	y
person 2	i am doing great thanks , yourself ?	調子いいわよ、ありがと。そっちは？	y
person 1	quite fine ! its lovely here on the west coast .	かなりいいよ！ここ西海岸はとってもいい天気さ。	y
person 2	do you live near the ocean ? love swimming , i go daily , but never in ocean !	海の近くに住んでるの？私は泳ぐの大好きで、毎日泳ぎに行ってるんだけど、海で泳いだことがないの！	y
person 1	absolutely ! i moved here from virginia , and swim in the pacific everyday .	もちろんさ！俺はバージニア州からこっちに移って、毎日太平洋で泳いでるよ。	y
person 2	sounds amazing . i love the color blue , i am picturing the clear blue skies and water .	素敵ね！私は青い色が好きだし、澄み切った青空と水を想像してるところよ。	y
person 1	moving here definitely was worth the drive in my dads ol pickup !	おやじの古いピックアップトラックで、こっちに移ってきた甲斐が間違いなくあったよ！	y
person 2	that sounds like quite an adventure , but a long drive !	かなりの冒険だったみたいね。それにしても長旅だわ！	y
person 1	it took three days ! we moved because my mom got a new teaching job here .	3日かかったんだよ！こっちでおふくろが新しく教職に就くっていうんで、俺たち引っ越してきたんだ。	y
person 2	what does she teach ? mine teaches also cello lessons ! she taught me to play too .	何を教えてるの？うちの母はチェロも教えてるよ！母は私にも教えてくれたわ。	y
person 1	she is a professor of environmental science , and great at it too ! where are you from ?	うちのおふくろは環境科学の教授。しかもデキるの！キミはどこ出身？	y
person 2	awesome ! i am from ny not the city , upstate .	すごい！私はニューヨークよ。市じゃなくて州北部。	y
person 1	i would love to live there ! my dad cannot find work there though , he is a cop .	そっちに住んでみたいなぁ！うちのおやじはそっちじゃ仕事に就けないけどね。おやじ、警察官なんだ。	y
person 2	it is pretty nice here , i enjoy actually getting 4 seasons a year , haha .	ここは結構いいわよ。ちゃんと四季が楽しめるしね、ハハハ。	y
