# Supplementary material
Source: ML conference proceedings conference paper supplement (https://aclanthology.org/2022.eval4nlp-1.9)
Supplement: SupplementaryMaterial [file 1290.xlsx]

## Sheet: Sheet1
person	source	translation	evaluation: is this a good translation?
person 1	howdy ! how all doing today ?	今日はどうだった ？	y
person 2	i am doing great thanks , yourself ?	感謝してるよ	n
person 1	quite fine ! its lovely here on the west coast .	いいぞここは美しい海岸だ	n
person 2	do you live near the ocean ? love swimming , i go daily , but never in ocean !	海の近くに住んでるのか ？ 海の中には毎日泳ぐのが好きなんだ	n
person 1	absolutely ! i moved here from virginia , and swim in the pacific everyday .	毎日ここからここへ越してきて毎日泳いで泳いできたんだ	n
person 2	sounds amazing . i love the color blue , i am picturing the clear blue skies and water .	いい色だブルー色も空も空もきれいだ	n
person 1	moving here definitely was worth the drive in my dads ol pickup !	ここまで来たのは間違いなくここまで来たんだ ！	n
person 2	that sounds like quite an adventure , but a long drive !	冒険みたいだけど運転は長いわ ！	n
person 1	it took three days ! we moved because my mom got a new teaching job here .	３ 日もかかったママが新しい仕事を教えてくれたから	n
person 2	what does she teach ? mine teaches also cello lessons ! she taught me to play too .	私のレッスンも教えてくれた	n
person 1	she is a professor of environmental science , and great at it too ! where are you from ?	彼女も環境科学の教授だし最高の科学者だよどこから来たんだ ？	n
person 2	awesome ! i am from ny not the city , upstate .	俺は街から来たんじゃない	n
person 1	i would love to live there ! my dad cannot find work there though , he is a cop .	パパは仕事が見つからない警官だ	n
person 2	it is pretty nice here , i enjoy actually getting 4 seasons a year , haha .	いい年だな今年は ４ 回も楽しめそうだ	n
