# Supplementary material
Source: ML conference proceedings conference paper supplement (https://aclanthology.org/2022.eval4nlp-1.9)
Supplement: SupplementaryMaterial [file 1303.xlsx]

## Sheet: Sheet1
person	source	translation	evaluation: is this a good translation?
person 1	hi there . i am carl and i take pictures for fun .	こんにちは。僕はカールで、写真を撮るのが趣味。	y
person 2	hi ! what kind of pictures do you take ?	こんにちは！どんな写真を撮るの？	y
person 1	all types , i have my own photo studio . what do you do	あらゆる種類さ。自分の撮影スタジオを持ってるんだ。キミ、仕事は？	y
person 2	i am a business owner . marketing consulting . do you do portraits ?	事業の経営者よ。マーケティング・コンサルティングのね。肖像写真ってやってる？	y
person 1	i do , i like candlelit portraits , so magical . i love my hobbies .	やってるよ。ろうそくの灯で撮影した肖像写真が、すごく幻想的で気に入ってるんだ。僕は自分の趣味が大好きでね。	y
person 2	those sound amazing ! i would love to have my two dogs photographed by candlelight .	それってステキね！うちの犬二匹も、ろうそくの明かりでぜひ撮影してもらいたいわ。	y
person 1	i will make those dogs look majestic . in the afternoon though , for i sleep late .	威風堂々として見えるように撮ってあげるよ。僕は遅くまで寝てるもんで、午後にってことになっちゃうけどね。	y
person 2	haha , they are small dogs who definitely already think they are majestic !	ハハハ。うちのは小型犬なんだけど、すでに自分たちには威厳があるって絶対に思ってるわ！	y
person 1	a few well placed candles will set the mood . what else do you do ?	うまい位置にいくつかろうそくを置くと雰囲気が出るんだよ。キミ、他には何をしてるの？	y
person 2	i have a daughter , so when i am not working i am taking care of her .	娘がひとりいてね、仕事してない時は娘の面倒を見てるわ。	y
person 1	i do too , she is my heart . i am glad to support her .	僕もさ。娘のことは愛してるし、娘の支えになってやれて僕は嬉しいよ。	y
person 2	aww , what is her name ?	うわー、名前は？	n
person 1	zoey . she turned two yesterday .	ゾーイだよ。昨日で2歳になったんだ。	y
person 2	that is a beautiful name . they grow up so fast .	ステキな名前だわ。子供ってすごく早く成長するのよねぇ。	y
person 1	too fast , it is selfish of me to want to freeze time .	早過ぎて、時間を止めたいって思う僕はわがままだね。	y
person 2	i think it is a little , but i feel the same way , so i cannot judge !	ちょっとだけわがままだって思うけど、私も同じように感じてるから、批判できないわ！	y
