# Supplementary material
Source: ML conference proceedings conference paper supplement (https://aclanthology.org/2022.eval4nlp-1.9)
Supplement: SupplementaryMaterial [file 1303.xlsx]

## Sheet: Sheet1
person	source	translation	evaluation: is this a good translation?
person 1	hi there . i am carl and i take pictures for fun .	こんにちは私はカーリと私は楽しい写真を撮るの	n
person 2	hi ! what kind of pictures do you take ?	どんな写真を撮ってるんだ ？	n
person 1	all types , i have my own photo studio . what do you do	俺の写真があるんだ何をするんだ ？	n
person 2	i am a business owner . marketing consulting . do you do portraits ?	俺は仕事のオーナーだ仕事の話をしてるんだぞ	n
person 1	i do , i like candlelit portraits , so magical . i love my hobbies .	私はフライドポテトが好きなんだ魔法が好きなんだ	n
person 2	those sound amazing ! i would love to have my two dogs photographed by candlelight .	すごい音だ犬が ２ 人の写真を撮るのが好きだ	n
person 1	i will make those dogs look majestic . in the afternoon though , for i sleep late .	私は犬を見るわ今日は遅くまで寝てるから	n
person 2	haha , they are small dogs who definitely already think they are majestic !	（ 吉森 ） おっとうちの子はもう大人だと思ってる犬なんだから	n
person 1	a few well placed candles will set the mood . what else do you do ?	他に何をしてるの ？	n
person 2	i have a daughter , so when i am not working i am taking care of her .	娘がいるから彼女の世話をしないと	n
person 1	i do too , she is my heart . i am glad to support her .	僕もだ彼女を支持してくれて嬉しいよ	n
person 2	aww , what is her name ?	彼女の名前は ？	y
person 1	zoey . she turned two yesterday .	ゾーイ、昨日二人を変えたわ	n
person 2	that is a beautiful name . they grow up so fast .	美しい名前だ早く成長してきた	n
person 1	too fast , it is selfish of me to want to freeze time .	早すぎて凍死したくない	n
person 2	i think it is a little , but i feel the same way , so i cannot judge !	私も同意見だと思うけど私も同意見だわ ！	n
