# Supplementary material
Source: ML conference proceedings conference paper supplement (https://aclanthology.org/2022.eval4nlp-1.9)
Supplement: SupplementaryMaterial [file 1310.xlsx]

## Sheet: Sheet1
person	source	translation	evaluation: is this a good translation?
person 1	hi , just made some awesome burgers .	あら素敵なハンバーガーを作ったわね	n
person 2	can i have some ? i am starving .	腹ペコなんだ	n
person 1	sure . but if i knew i was going to share would have made something better .	でももし私が何か良いことをしたと知ってたら...	n
person 2	i can sew you something in return	戻ってきたものをあげるわ	n
person 1	oh nice . how about a drake sweater . that would be amazing !	セーターはどう ？	n
person 2	yeah that will be extra fabulous	それはいいね	n
person 1	i have too much energy for sewing . practicing drums is more my speed .	私には多くのエネルギーがあるドラムを練習するのはもっと早い	n
person 2	do you have any pets	ペットはいるか ？	n
person 1	nope . assuming you have some ?	違うわいくつか持ってきて	n
person 2	i have a cat , his name is crunchy	猫がいるの彼の名前は吐きそうなの	n
person 1	i stay out too much to have pets . it would starve .	ペットを飼うにはあまりにも多すぎる餓死するわ	n
person 2	that is sad . i can share my cat with you	悲しいわね猫と共有できるわ	n
person 1	he might come back pretty gangster . i listen to a lot of rap .	彼が戻ってくるかもしれないたくさんのギャングが戻ってくるかもしれないラップの話を聞いている。	n
person 2	crunchy is the most gangster	ゴタゴタは一番のギャングだ。	n
