# Supplementary material
Source: ML conference proceedings conference paper supplement (https://aclanthology.org/2022.eval4nlp-1.9)
Supplement: SupplementaryMaterial [file 1310.xlsx]

## Sheet: Sheet1
person	source	translation	evaluation: is this a good translation?
person 1	hi , just made some awesome burgers .	こんにちは。ちょうど美味しいハンバーガーが出来上がったところだよ。	y
person 2	can i have some ? i am starving .	少しもらえない？おなかがペコペコなの。	y
person 1	sure . but if i knew i was going to share would have made something better .	もちろん！シェアするってわかってたら、何かもっといい物を作ってたのに。	y
person 2	i can sew you something in return	お返しに何か縫ってあげられるけど。	y
person 1	oh nice . how about a drake sweater . that would be amazing !	あ、いいね。ドレイクのセーターなんかどう？ステキよね！	y
person 2	yeah that will be extra fabulous	そうね、特別ステキな物になるわ。	y
person 1	i have too much energy for sewing . practicing drums is more my speed .	裁縫だと私にはエネルギーがあり余っちゃうなぁ。ドラムの練習の方が私好みだわ。	y
person 2	do you have any pets	何かペット飼ってる？	y
person 1	nope . assuming you have some ?	いいや。そっちは何か飼ってるんだよね？	y
person 2	i have a cat , his name is crunchy	うちには猫がいて、クランチーって名前なの。	y
person 1	i stay out too much to have pets . it would starve .	ペットを飼うには家を留守にすることが多いし、餓死させちゃうなぁ。	y
person 2	that is sad . i can share my cat with you	残念ね。うちの猫をシェアしてもいいわよ。	y
person 1	he might come back pretty gangster . i listen to a lot of rap .	かなりの不良になって戻ってきたりしてね。私、ラップかなり聴くし。	y
person 2	crunchy is the most gangster	クランチーは不良の最たるものよ。	y
