# Supplementary material
Source: ML conference proceedings conference paper supplement (https://aclanthology.org/2022.eval4nlp-1.9)
Supplement: SupplementaryMaterial [file 1311.xlsx]

## Sheet: Sheet1
person	source	translation	evaluation: is this a good translation?
person 1	hi my name is john	私の名前はジョンです	n
person 2	hi john . i am cassandra .	こんにちはジョン私はキャラです	n
person 1	hi cassandra . what do you like to do for fun ?	お楽しみは ？	n
person 2	i like to clean my house and keep things tidy . how about you ?	私の家を掃除して掃除したいのあなたは ？	n
person 1	i am more into outdoor activities and sports .	私はドアやスポーツにもっと興味があるわ	n
person 2	i like sports too , but i do not go out much due to terrible allergies .	スポーツも好きだが悪いアレルギーにはならない	n
person 1	that would be hard for me since i enjoy camping so much	キャンプを楽しんで以来、私にとっては辛いことになるでしょう	n
person 2	my children like camping and so did i , but my allergies became very debilitating .	子供たちはキャンプが好きで、私はしましたが、アレルギーはとても刺激的になりました	n
person 1	wow , can you still work ?	まだ仕事できるのか ？	n
person 2	yes , i work in a very clean medical office .	ええきれいな医療室で働いてるの	y
person 1	nice , i spend most of my job inside a truck cabin driving	いいわ私は車の中で仕事をしています	n
person 2	that must be interesting to see the world driving around !	世界中が運転するのを楽しみにしているはずだ ！	n
person 1	i love working for hostess and driving around the state .	私はホステスのために働いて州の周りを運転するのが大好きだ	n
person 2	i would end up eating all those yummy treats ! my uncle worked for your rival company .	私が食べるわ伯父はあなたの会社のために働いていたのよ	n
person 1	its why i play first base on the weekends to burn off the calories	なぜ最初の基地で演奏したのか説明してよ	n
person 2	that is a great idea ! i would get sick on a baseball field though !	野球場で気分が悪くなるぞ ！	n
