# Supplementary material
Source: ML conference proceedings conference paper supplement (https://aclanthology.org/2022.eval4nlp-1.9)
Supplement: SupplementaryMaterial [file 1311.xlsx]

## Sheet: Sheet1
person	source	translation	evaluation: is this a good translation?
person 1	hi my name is john	こんにちは。ジョンです。	y
person 2	hi john . i am cassandra .	こんにちは、ジョン。カサンドラよ。	y
person 1	hi cassandra . what do you like to do for fun ?	どうも、カサンドラ。キミの楽しみって何？	n
person 2	i like to clean my house and keep things tidy . how about you ?	うちの掃除と整理整頓が好きなの。そちらは？	y
person 1	i am more into outdoor activities and sports .	どっちかっていうとアウトドアとかスポーツに興味があるんだ。	y
person 2	i like sports too , but i do not go out much due to terrible allergies .	私もスポーツは好きだけど、ひどいアレルギーであんまり外に出ないのよねぇ。	y
person 1	that would be hard for me since i enjoy camping so much	僕はキャンプがものすごく好きだから、そうなると僕だとつらいだろうなぁ。	y
person 2	my children like camping and so did i , but my allergies became very debilitating .	うちの子たちもキャンプ好きだし、私も好きだったんだけど、アレルギーがすごく悪化しちゃったもんで。	y
person 1	wow , can you still work ?	うわっ、それでも働けるの？	y
person 2	yes , i work in a very clean medical office .	ええ、とっても清潔な診療所で働いてるわ。	y
person 1	nice , i spend most of my job inside a truck cabin driving	いいね。僕は仕事の大半をトラックの運転席で過ごしてるよ。	y
person 2	that must be interesting to see the world driving around !	ドライブしながら世界を見て回るのは、面白いでしょうね！	y
person 1	i love working for hostess and driving around the state .	ホステス社の仕事でアメリカ国内をドライブして回るの、僕はすごく気に入ってる。	n
person 2	i would end up eating all those yummy treats ! my uncle worked for your rival company .	私ならあそこの美味しいお菓子全部食べることになっちゃうわ！うちの叔父はね、あなたのところのライバル会社に勤めてるのよ。	n
person 1	its why i play first base on the weekends to burn off the calories	だからこそ、カロリー消費のために週末は一塁を守ってるってわけ。	y
person 2	that is a great idea ! i would get sick on a baseball field though !	素晴らしいアイデアね！私なら野球場で具合が悪くなっちゃうんだろうけどね！	y
