# Supplementary material
Source: ML conference proceedings conference paper supplement (https://aclanthology.org/2022.eval4nlp-1.9)
Supplement: SupplementaryMaterial [file 1317.xlsx]

## Sheet: Sheet1
person	source	translation	evaluation: is this a good translation?
person 1	hi there how are you ?	こんにちは。調子はどう？	y
person 2	i am well . how are you doing ?	いいわよ。そっちは調子どう？	y
person 1	just admiring my new waterproof iphone . samsung stinks !	ちょうどね、自分の防水加工の新しいアイフォーンにうっとりしてたところなの。サムスンはダメダメね！	n
person 2	that is cool ! have you tested it out in the water yet ? lol	いいね！もう水の中で試してみた（笑）？	y
person 1	i did ! accidentally washed it in the machine . good as new !	試したわよ！うっかり洗濯機で洗っちゃったのに、ぴんぴんしてるわ！	y
person 2	oh good , it works ! i am still in college so i use my iphone a ton	あー、それはよかった。防水加工の効果ってあるんだね！私はまだ大学生だから、アイフォーンもいっぱい使ってるわ。	n
person 1	awesome ! are you liking college ? any cute boys in class ?	いいね！大学は気に入ってる？クラスに誰かカッコいい子いない？	y
person 2	i still have 2 years left imaging degree . no cute boys yet ;	まだあと2年残ってて、画像学専攻なの。カッコいい子はまだいないわ。	y
person 1	oh neat . that is what i thought ! they were not that cute when i went either	あら、いいわね。そうじゃないかと思ったわ！私が通ってた時でも、みんなそんなにカッコよくなかったもんなぁ。	y
person 2	i am going to be the crazy cat lady . i already have 4 hahas	私ね、猫大好きおばさんになるつもりでね、すでに4匹飼ってるのよ（笑）！	y
person 1	that is amazing . you might be an introvert ?	それはステキね。ひょっとして内向的な人？	y
person 2	somewhat . i work at a grocery store and keep to myself . you ?	若干ね。私はスーパーで働いてて、人付き合いはしないの。そっちは？	y
