# Supplementary material
Source: ML conference proceedings conference paper supplement (https://aclanthology.org/2022.eval4nlp-1.9)
Supplement: SupplementaryMaterial [file 1317.xlsx]

## Sheet: Sheet1
person	source	translation	evaluation: is this a good translation?
person 1	hi there how are you ?	元気か ？	n
person 2	i am well . how are you doing ?	元気よ元気 ？	y
person 1	just admiring my new waterproof iphone . samsung stinks !	新しい水飲み場の証拠を尊敬しているだけだ歌の臭いがする ！	n
person 2	that is cool ! have you tested it out in the water yet ? lol	それはクールだまだ水でテストしたのか ？	n
person 1	i did ! accidentally washed it in the machine . good as new !	そうだ装置の中にあったんだ新しいほうがいい ！	n
person 2	oh good , it works ! i am still in college so i use my iphone a ton	（ 静流 ） よかった大学にいるから携帯使ってみたんだけど	n
person 1	awesome ! are you liking college ? any cute boys in class ?	（ 静流 ） すごい大学は好き ？	n
person 2	i still have 2 years left imaging degree . no cute boys yet ;	まだ 2 年残ってるけど可愛い子はまだいない	n
person 1	oh neat . that is what i thought ! they were not that cute when i went either	素敵だと思った時も可愛いと思ってたわ	n
person 2	i am going to be the crazy cat lady . i already have 4 hahas	私は猫のように狂った猫になるわ私はすでに 4 つの謎を持っているの	n
person 1	that is amazing . you might be an introvert ?	信じられないあなたは秘密にしてるの ？	n
person 2	somewhat . i work at a grocery store and keep to myself . you ?	ちょっと買い物店で働いてるんだけど自分のことは自分でやってくれる ？	n
