# Supplementary material
Source: ML conference proceedings conference paper supplement (https://aclanthology.org/2022.eval4nlp-1.9)
Supplement: SupplementaryMaterial [file 1319.xlsx]

## Sheet: Sheet1
person	source	translation	evaluation: is this a good translation?
person 1	hi , want to get to know each other ?	お互いを知りたいのか ？	n
person 2	sure , i am into rpg computer games !	もちろん、私はコンピューターゲームに参加しています ！	n
person 1	that is creative . i like to write	それは創造的なものです私は書きたい	n
person 2	cool . i have a co worker who likes to write . i actually have a crush on them	好きな店があるんだ	n
person 1	do they know how you feel ?	気分はわかるか ？	n
person 2	no , but i am thinking about telling them when friends and i play tabletop games	いいえ、私は考えているのですが、私は彼らに友人と私は彼らに話しているときに私は、上のゲームをしているとき、私は考えている	n
person 1	you should . life is too short to keep that in	そうすべきだ人生は短い	n
person 2	i am slightly embarrassed i live at home still though	まだ家に住んでいるのは恥ずかしいけど	n
person 1	that is not embarrassing in this economy	この経済では恥ずかしいことではありません	n
person 2	thank you . that gave me a confidence boost . what do you like to do ?	ありがとう信頼を得ましたどうしますか ？	n
person 1	i enjoy nature walks like hiking	私は自然の王のように歩くのが楽しい	n
person 2	oh that sounds fun . maybe i should try that sometime	楽しそうだいつかそれを試してみるべきだった	n
person 1	there is nothing better to feed the soul	魂を食べた方がいい	n
person 2	what else do you have planned for tonight ?	今夜は他に何を考えてる ？	y
person 1	a good nights sleep i suppose . you ?	お休みなさいあなたは ？	n
person 2	i hope i do too ! feeling pretty tired	私もよ疲れた気分だわ	n
