# Supplementary material
Source: ML conference proceedings conference paper supplement (https://aclanthology.org/2022.eval4nlp-1.9)
Supplement: SupplementaryMaterial [file 1319.xlsx]

## Sheet: Sheet1
person	source	translation	evaluation: is this a good translation?
person 1	hi , want to get to know each other ?	こんにちは。知り合いにならない？	n
person 2	sure , i am into rpg computer games !	もちろんいいわよ。私はね、パソコンのロールプレイングゲームにハマってるの！	y
person 1	that is creative . i like to write	あれは創造力を養うよね。僕は物を書くのが好きなんだー。	y
person 2	cool . i have a co worker who likes to write . i actually have a crush on them	いいね。私の同僚で物を書くのが好きな人がいてね、実は私、その人のことが好きになっちゃって。	y
person 1	do they know how you feel ?	むこうは君の気持ち、知ってるの？	y
person 2	no , but i am thinking about telling them when friends and i play tabletop games	いいえ。でもね、友達とテーブルゲームする時に、その人に告白しようって思ってるんだー。	n
person 1	you should . life is too short to keep that in	そうするべきだよ。人生は短いんだから、黙ってたらもったいないよ。	y
person 2	i am slightly embarrassed i live at home still though	ちょっと恥ずかしいんだけど、私はまだ実家に住んでるのよねぇ。	y
person 1	that is not embarrassing in this economy	この景気じゃ、恥ずかしくなんてないよ。	y
person 2	thank you . that gave me a confidence boost . what do you like to do ?	ありがと。自信がついたわ。あなたは何をするのが好き？	y
person 1	i enjoy nature walks like hiking	僕はハイキングとか、自然の中を歩くのが好き。	y
person 2	oh that sounds fun . maybe i should try that sometime	あ、それって楽しそうね。たまには私もやってみようかな。	y
person 1	there is nothing better to feed the soul	これ以上に魂を満たすものなんてないさ。	y
person 2	what else do you have planned for tonight ?	何か他に今夜の予定は？	y
person 1	a good nights sleep i suppose . you ?	ぐっすり寝ることかな。キミは？	y
person 2	i hope i do too ! feeling pretty tired	私もぐっすり寝れるといいな！かなり疲れてるんだよねぇ。	y
