# Supplementary material
Source: ML conference proceedings conference paper supplement (https://aclanthology.org/2022.eval4nlp-1.9)
Supplement: SupplementaryMaterial [file 1325.xlsx]

## Sheet: Sheet1
person	source	translation	evaluation: is this a good translation?
person 1	hello . how are you doing ?	こんにちは。調子はどう？	y
person 2	good , getting ready for my gig tonight i am a singer and i love it !	いいよ。今夜のコンサートの準備してるところなの。私は歌手なんだけど、この仕事すごく気に入ってるの！	y
person 1	what kind of music do you sing ?	どんな音楽で歌うの？	n
person 2	rock . i usually do gigs on saturdays but a job is a job .	ロックだよ。いつもは土曜にコンサートやってるんだけどさ、仕事は仕事だからね。	y
person 1	that sounds like a lot of fun .	すごく楽しそうだね。	y
person 2	it is . what do you do for work ?	楽しいよ。そっちは何やってるの？	y
person 1	i work at a boring desk .	退屈なデスクワーク。	y
person 2	that does not sound like much fun . do you have a signficant other ?	そりゃあんまりおもしろくなさそうだね。恋人はいる？	y
person 1	yes , she works in retail .	いるよ。彼女は小売業で働いてる。	y
person 2	my girlfriend too . i should treat her better but i cook her breakfast every sunday .	うちもだよ。私さ、彼女をもっと大事にしなくちゃいけないんだよねぇ。でも毎週日曜には朝食を作ってあげてんの。	y
person 1	you should take good care of your woman .	自分の女は大事にしないとね。	y
person 2	i know . being a woman too sometimes i am a little selfish . any hobbies ?	だよね。私も女だから、時々ちょっと自己中になっちゃうの。なんか趣味ある？	y
person 1	i like football a lot	僕はフットボールが大好き。	y
person 2	football is fun , whats your favorite team ?	フットボール楽しいよね。一番好きなチームは？	y
