# Supplementary material
Source: ML conference proceedings conference paper supplement (https://aclanthology.org/2022.eval4nlp-1.9)
Supplement: SupplementaryMaterial [file 1325.xlsx]

## Sheet: Sheet1
person	source	translation	evaluation: is this a good translation?
person 1	hello . how are you doing ?	こんにちは調子はどう ？	y
person 2	good , getting ready for my gig tonight i am a singer and i love it !	今夜のギグの準備をしてくれ俺は歌手だ大好きだ ！	n
person 1	what kind of music do you sing ?	どんな曲を歌ってるんだ ？	n
person 2	rock . i usually do gigs on saturdays but a job is a job .	ロックは好きだが仕事は仕事だ	n
person 1	that sounds like a lot of fun .	楽しそうだな	y
person 2	it is . what do you do for work ?	仕事は何してるの ？	n
person 1	i work at a boring desk .	退屈な机で仕事をしてる	n
person 2	that does not sound like much fun . do you have a signficant other ?	楽しいとは思えない他にサインは ？	n
person 1	yes , she works in retail .	ああ裏で働いてる	n
person 2	my girlfriend too . i should treat her better but i cook her breakfast every sunday .	私の彼女も朝食を作ってあげないと	n
person 1	you should take good care of your woman .	女のことは気にしない方がいいわね	n
person 2	i know . being a woman too sometimes i am a little selfish . any hobbies ?	そうだね時々自分が利己的な女だと時々思ってるんだ	n
person 1	i like football a lot	フットボールが好きなの	n
person 2	football is fun , whats your favorite team ?	フットボールは楽しいか ？ 好きなチームは ？	n
