# Supplementary material
Source: ML conference proceedings conference paper supplement (https://aclanthology.org/2022.eval4nlp-1.9)
Supplement: SupplementaryMaterial [file 1327.xlsx]

## Sheet: Sheet1
person	source	translation	evaluation: is this a good translation?
person 1	hello i am so glad to meet you	お会いできて嬉しいです	n
person 2	hey , i am glade to meet you too .	私もグラディスです	n
person 1	where do you currently reside	あなたは今どこにいるの ？	n
person 2	i reside in new york with my parents but tell me about yourself	新しい両親と一緒にニューヨークに戻ったけど自分のことを話して	n
person 1	i am a stay at home mom and i love pugs , my kids , and the rockies .	私は家にいるママと子供たちのことも愛してる	n
person 2	that sounds like an awesome job . do you play games with your kids ?	いい仕事だ子供と遊びたいのか ？	n
person 1	yeah now that i am done with law school we have lots of play time	学校の法律はもうたくさんだ	n
person 2	great is sounds like a lot of fun . would u like to know a little about myself ?	楽しそうだわ自分のこと知りたい ？	n
person 1	of course ! i would love to .	もちろんよ行きたいわ	n
person 2	for 32 year i have been with my parents who always want for jobs	3 2 年間は両親と仕事をしたい人と一緒に働いてきたの	n
person 1	wow that must be hard	それは大変でしょう	y
person 2	i am sorry i never got your name , my name is trevor	あなたの名前を聞いたことがありませんでした私の名前はボスニアです	n
person 1	oh how silly huh ! angela .	なんてバカなんだ、アンジェラ	y
person 2	yes it is hard but i usually relax by playing my games .	そうだけど僕はいつもゲームでリラックスしてるんだ	n
person 1	what kind of games do you play	どんなゲームをするんだ ？	y
person 2	angela is a nice name , and i usually play sport games	アンジェラはいい名前だしいつもゲームをしてる	n
