# Supplementary material
Source: ML conference proceedings conference paper supplement (https://aclanthology.org/2022.eval4nlp-1.9)
Supplement: SupplementaryMaterial [file 1327.xlsx]

## Sheet: Sheet1
person	source	translation	evaluation: is this a good translation?
person 1	hello i am so glad to meet you	こんにちは。はじめまして！	y
person 2	hey , i am glade to meet you too .	こんにちは。こちらこそ、はじめまして。	y
person 1	where do you currently reside	今どちらにお住まいですか？	y
person 2	i reside in new york with my parents but tell me about yourself	ニューヨークで両親と暮らしてます。そちらの自己紹介を。	n
person 1	i am a stay at home mom and i love pugs , my kids , and the rockies .	私は専業主婦で、パグとうちの子ども達とロッキーズが大好きです。	y
person 2	that sounds like an awesome job . do you play games with your kids ?	最高のお仕事みたいですね。お子さんたちとはゲームしてます？	y
person 1	yeah now that i am done with law school we have lots of play time	ええ。ロースクールが終わったので、遊ぶ時間はたっぷりです。	y
person 2	great is sounds like a lot of fun . would u like to know a little about myself ?	いいですね。とても楽しそう。少し僕のこと知りたいですか？	y
person 1	of course ! i would love to .	もちろんです。是非！	y
person 2	for 32 year i have been with my parents who always want for jobs	僕は、いつも仕事先のない両親と32年間一緒に暮らしてます。	y
person 1	wow that must be hard	わー、それは大変でしょうねぇ。	y
person 2	i am sorry i never got your name , my name is trevor	失礼、君の名前を聞いてませんでしたね。僕はトレバーっていいます。	y
person 1	oh how silly huh ! angela .	まあ、私ったら！アンジェラよ。	y
person 2	yes it is hard but i usually relax by playing my games .	ええ、大変なんですが、僕は普段ゲームしてリラックスしてるんです。	y
person 1	what kind of games do you play	どんなゲームしてるんですか？	y
person 2	angela is a nice name , and i usually play sport games	アンジェラっていい名前ですね。僕は大抵スポーツのゲームをやってます。	y
