# Supplementary material
Source: ML conference proceedings conference paper supplement (https://aclanthology.org/2022.eval4nlp-1.9)
Supplement: SupplementaryMaterial [file 1331.xlsx]

## Sheet: Sheet1
person	source	translation	evaluation: is this a good translation?
person 1	hi ! how are you today ?	今日はどうだった ？	n
person 2	i am fine , and you ?	元気だよ君は ？	y
person 1	i am also doing well . i just got home from a trip to norway .	私もよくやってる普通の旅行から帰ったばかりだ	n
person 2	i have traveled all of the world on my yacht recently .	ボートで世界を旅してきたんだ	n
person 1	nice ! i have had a lot of time to travel since i have retired recently .	最近引退してからずっと旅をしてきたんだ	n
person 2	oh i know that feeling , i love painting , you ?	絵が大好きなんだよね ？	n
person 1	i am not much into painting . but my wife loves it .	絵に描くのは苦手だが妻はそれを愛してる	n
person 2	oh , you are married ? i am not , i have about 23 cats , i am a cat lady !	結婚してるのか ？ 猫は ２ ３ 才の女性だぞ ！	n
person 1	i love cats but i have now . i am working on traveling everywhere in the bible .	猫は好きだけど今はどこでも移動できるわ	n
person 2	that sounds exciting . what foods do you like ?	楽しそうだなどんな風に見える ？	n
person 1	i enjoy barbecue . i guess mostly comfort foods . nothing too exotic .	バーベキューは好きだけどエキゾチックでさえない	n
person 2	me either , i do not like fish , the taste makes me nauseous !	俺も魚が嫌いだ味わいがするんだ ！	n
person 1	yeah same here ! have you seen any good movies lately .	最近の映画は最高だな	n
person 2	yes , it , have you seen it ?	見たことある ？	n
person 1	not yet . its on my list though .	まだだリストに載ってた	n
person 2	it was good ! a little eerie .	よかった少しだけ	n
