# Supplementary material
Source: ML conference proceedings conference paper supplement (https://aclanthology.org/2022.eval4nlp-1.9)
Supplement: SupplementaryMaterial [file 1331.xlsx]

## Sheet: Sheet1
person	source	translation	evaluation: is this a good translation?
person 1	hi ! how are you today ?	こんにちは！ご機嫌いかがですか？	y
person 2	i am fine , and you ?	いいですわよ。そちらは？	y
person 1	i am also doing well . i just got home from a trip to norway .	こちらも元気でやっとります。ちょうどノルウェー旅行から戻ったところでして。	y
person 2	i have traveled all of the world on my yacht recently .	私は最近、自分のヨットで世界を旅してきましたのよ。	y
person 1	nice ! i have had a lot of time to travel since i have retired recently .	いいですなー！私は最近退職したもんで、旅行する時間はたっぷりありましてね。	y
person 2	oh i know that feeling , i love painting , you ?	あら、そのお気持ちわかりますわ。私は絵を描くのが大好きなんですけど、そちらは？	y
person 1	i am not much into painting . but my wife loves it .	私は絵はそれほどでもないんですが、妻は大好きなんです。	y
person 2	oh , you are married ? i am not , i have about 23 cats , i am a cat lady !	あら、ご結婚なさってらっしゃるの？私はしてませんのよ。23匹ほど猫を飼ってましてね、猫好きなんですのよ！	y
person 1	i love cats but i have now . i am working on traveling everywhere in the bible .	猫は大好きなんですが、うちには一匹もおりません。私はですね、聖書に出てくる場所をくまなく旅行することに今取り組んでおるんです。	y
person 2	that sounds exciting . what foods do you like ?	それは面白そうですわね。どんな食べ物がお好きですの？	y
person 1	i enjoy barbecue . i guess mostly comfort foods . nothing too exotic .	バーベキューが大好きでして。主に、食べるとホッとする料理でしょうか。珍し過ぎるのはダメですね。	y
person 2	me either , i do not like fish , the taste makes me nauseous !	私もですのよ。私は魚が苦手でしてね、あの味にはムカムカしますのよ！	y
person 1	yeah same here ! have you seen any good movies lately .	ええ、全く同感ですな！最近、何かいい映画をご覧になりましたか？	y
person 2	yes , it , have you seen it ?	ええ、イットを。ご覧になりまして？	n
person 1	not yet . its on my list though .	いえ、まだです。観るつもりにはしてますが。	y
person 2	it was good ! a little eerie .	よかったですわよ！ちょっと薄気味悪くってね。	y
