# Supplementary material
Source: ML conference proceedings conference paper supplement (https://aclanthology.org/2022.eval4nlp-1.9)
Supplement: SupplementaryMaterial [file 1332.xlsx]

## Sheet: Sheet1
person	source	translation	evaluation: is this a good translation?
person 1	hi ! how are you today ?	こんにちは！調子はどう？	y
person 2	i am good how are u	いいわよ。そっちは？	y
person 1	loving this late summer weather . . . not looking forward to winter	夏の終わりのこの天気、気に入ってるのになぁ・・・。冬が来るのなんて待ち遠しくもないよ。	y
person 2	i love cold weather cant stand the heat	私は寒いのが好き。暑さには耐えられないわ。	y
person 1	really ? i love the ocean	マジで？僕はね、海が大好きなんだー。	y
person 2	i cant stand the ocean its so big	私は海が大嫌い。海ってめっちゃ広いし。	y
person 1	and full of mysterious creatures ! i loved swimming with giant manta rays !	それに謎の生物でいっぱいだもんね！僕はでっかいオニイトマキエイと一緒に泳ぐのがお気に入りだったよ！	y
person 2	i love the creatures but i could not swim that deep	生き物は大好きなんだけど、私はそこまで深くは泳げないの。	y
person 1	why is that ? too scary ?	なんで？怖すぎる？	y
person 2	yes i cant stand being scared	そうなの。恐怖におびえるなんて耐えられないわ。	y
person 1	fears are for overcoming . that is what my parents always said	恐怖は乗り越えるためにあるんだって、うちの両親がいつもそう言ってたよ。	y
person 2	they sound very wise indeed	確かにあなたのご両親はすごく賢いようね。	y
person 1	yes they are . they are both practicing lawyers	ああ、そうなんだよ。二人とも開業弁護士でさ。	y
person 2	law sounds like a very fun profession	弁護士ってとっても面白そうなお仕事みたいね。	y
