# Supplementary material
Source: ML conference proceedings conference paper supplement (https://aclanthology.org/2022.eval4nlp-1.9)
Supplement: SupplementaryMaterial [file 1332.xlsx]

## Sheet: Sheet1
person	source	translation	evaluation: is this a good translation?
person 1	hi ! how are you today ?	今日はどうだ ？	n
person 2	i am good how are u	元気だよ	n
person 1	loving this late summer weather . . . not looking forward to winter	夏の太陽が好きです冬を楽しみにしていません	n
person 2	i love cold weather cant stand the heat	I love love cold weather down t h e heat	n
person 1	really ? i love the ocean	本当に海が好きなんだ	n
person 2	i cant stand the ocean its so big	海が大きくなってきた	n
person 1	and full of mysterious creatures ! i loved swimming with giant manta rays !	神秘的な生き物と巨大な太陽が好きだった ！	n
person 2	i love the creatures but i could not swim that deep	動物が好きだけどあの深く泳げなかったの	n
person 1	why is that ? too scary ?	どうして怖いの ？	n
person 2	yes i cant stand being scared	はい、怖れることはできません	n
person 1	fears are for overcoming . that is what my parents always said	怖いのは親がいつも言っていたことです	n
person 2	they sound very wise indeed	彼らは非常に賢明な音がしています	n
person 1	yes they are . they are both practicing lawyers	そうです彼らは両方の弁護士を練習しています	n
person 2	law sounds like a very fun profession	法律的には楽しい仕事だ	n
