# Supplementary material
Source: ML conference proceedings conference paper supplement (https://aclanthology.org/2022.eval4nlp-1.9)
Supplement: SupplementaryMaterial [file 1335.xlsx]

## Sheet: Sheet1
person	source	translation	evaluation: is this a good translation?
person 1	i do not like animals , but i do not think its nice to eat them .	僕ね、動物って好きじゃないんだけどさ、やつらを食べるのはいいことだとは思ってないんだよねぇ。	y
person 2	fair enough ! are you vegan ?	なるほどね！あなた、ビーガンなの？	y
person 1	vegetarian actually . i have some food allergies , but i wo not touch meat . you ?	いや実際には菜食主義者。ちょっと食物アレルギーがあるんだけど、僕は肉には手をつけないんだ。	y
person 2	food allergies are not fun . i do not cook a lot so just eat whatever really	食物アレルギーじゃ面白くないわね。私ってあんまり料理しないし、実のところただ何でもかんでも食べてるってだけなの。	y
person 1	cool , i love in a farm with pigs so its hard to eat them .	いいね。僕は牧場で豚と一緒に居るの好きだし、あいつらを食べるのはキツいよ。	n
person 2	i understand . i am quite shy but i really love singing	わかるわ。私ね、かなりの恥ずかしがり屋なんだけど、歌うのがすごく好きなの。	y
person 1	i sure hope to move to the city . i bet they have lots of singing there .	マジで都会に引っ越したいと思っててさ。きっと都会じゃ歌もたくさんやってるんだろうな。	n
person 2	they do ! i auditioned for a talent show recently	やってるわよ！最近ね、タレント発掘番組のオーディションを受けたの。	y
person 1	that is awesome . how did it go ?	そりゃすごいね。どうだった？	y
person 2	well i panicked at first and did not show up	えっとね、最初はパ二くっちゃって、冴えなかったのよ。	n
person 1	oh . i know that can make you nervous . i would be scared .	あー、あがっちゃうの分かるなぁ。僕ならビビっちゃうよ。	y
person 2	before that i would never sang in front of anyone . but i gave it a go	これまで人前で歌うことはなかったんだけど、挑戦してみたの。	y
person 1	its good to go after your dreams . whats the point if we do not ?	自分の夢を追い求めるのはいいことさ。夢は追わなきゃ意味ないよ。	y
person 2	exactly . it went well in the end and i am though to the next round	そのとおりだわ。最終的にはうまくいってね、合格して次の段階に進んだのよ。	y
person 1	well congratulations . i am proud of you !	おや、それはおめでとう。よくやったね！	y
person 2	thanks , so do you work on the farm ?	ありがとう。で、あなたは牧場で働いてるの？	y
