# Supplementary material
Source: ML conference proceedings conference paper supplement (https://aclanthology.org/2022.eval4nlp-1.9)
Supplement: SupplementaryMaterial [file 1335.xlsx]

## Sheet: Sheet1
person	source	translation	evaluation: is this a good translation?
person 1	i do not like animals , but i do not think its nice to eat them .	動物は好きじゃないけど食べちゃダメだと思うわ	y
person 2	fair enough ! are you vegan ?	いいだろうお前はベネガンか ？	n
person 1	vegetarian actually . i have some food allergies , but i wo not touch meat . you ?	ベジタリアンなんだけど肉に触らないの ？	n
person 2	food allergies are not fun . i do not cook a lot so just eat whatever really	アレルギーは楽しくない何も食べないんだ	n
person 1	cool , i love in a farm with pigs so its hard to eat them .	豚と豚の食べやすい農場が好きだ	n
person 2	i understand . i am quite shy but i really love singing	わかってるけど歌が好きなの	n
person 1	i sure hope to move to the city . i bet they have lots of singing there .	街に行きたいわ歌がいっぱいあるのよ	n
person 2	they do ! i auditioned for a talent show recently	最近才能のショーに参加したんだ	n
person 1	that is awesome . how did it go ?	すごいな調子はどうだった ？	n
person 2	well i panicked at first and did not show up	最初はパニックになって現れなかった	n
person 1	oh . i know that can make you nervous . i would be scared .	緊張するのが怖いんだ	n
person 2	before that i would never sang in front of anyone . but i gave it a go	誰にも歌わない前に歌ったことがない	n
person 1	its good to go after your dreams . whats the point if we do not ?	夢の後を追うのは得意なんだよな ？	n
person 2	exactly . it went well in the end and i am though to the next round	結局うまくいったけど次のラウンドまでは	n
person 1	well congratulations . i am proud of you !	おめでとう誇りに思うわ	y
person 2	thanks , so do you work on the farm ?	ありがとう農場で働いてるの ？	y
