# Supplementary material
Source: ML conference proceedings conference paper supplement (https://aclanthology.org/2022.eval4nlp-1.9)
Supplement: SupplementaryMaterial [file 1339.xlsx]

## Sheet: Sheet1
person	source	translation	evaluation: is this a good translation?
person 1	i names yumi and i work over 60 hours as a manager at a restaurant	夕美と夕美と俺は店で ６ ０ 時間働いてるんだけど	n
person 2	that is a lot of work . why work so much ?	それは大変な仕事だなぜそんなに仕事を ？	y
person 1	because we are short on staff . my boss does not give me days off .	上司には時間がない	n
person 2	i am an artist . where are you from ?	芸術家だどこから来たんだ ？	y
person 1	i am in a small town in kansas , i do not like my boss	俺はカンザスの小さな町にいる上司が嫌いなんだ	n
person 2	sounds like you need a new job .	新しい仕事が必要みたいだな	y
person 1	i do , i just cannot seem to find one at the moment .	今は見つからないんだ	n
person 2	yeah . ever thought about moving to another place ?	別の場所に移動することを考えたことは ？	n
person 1	i do but do to this only job for source of income it has been tough	あるけど今回の仕事は大変なことになった	n
person 2	understand . starving artist here . i am in france though so it is different .	分かったここで飢えた芸術家だが違っている	n
person 1	i hear france is nice	いい思い出だと聞いた	n
person 2	it is a beautiful place but i am biased born here .	美しい場所だけどここで生まれたの	n
person 1	what do you mean biased born	どういう意味だ ？	n
person 2	i am biased about france being beautiful because i was born in france .	私は愛情の美しさを感じていますなぜなら私が生まれたからです	n
