# Supplementary material
Source: ML conference proceedings conference paper supplement (https://aclanthology.org/2022.eval4nlp-1.9)
Supplement: SupplementaryMaterial [file 1339.xlsx]

## Sheet: Sheet1
person	source	translation	evaluation: is this a good translation?
person 1	i names yumi and i work over 60 hours as a manager at a restaurant	ユミです。レストランのマネージャーとして60時間以上働いてます。	y
person 2	that is a lot of work . why work so much ?	それは大変な仕事だね。なんでそんなに働いてるの？	y
person 1	because we are short on staff . my boss does not give me days off .	スタッフ不足だからよ。上司が休みをくれなくって。	y
person 2	i am an artist . where are you from ?	僕は芸術家。キミはどこ出身？	y
person 1	i am in a small town in kansas , i do not like my boss	カンザス州のちっぽけな町にいるわ。私は上司が苦手なの。	y
person 2	sounds like you need a new job .	キミには新しい仕事が必要みたいだね。	y
person 1	i do , i just cannot seem to find one at the moment .	そうなの。ただ今はどうしても見つからないみたい。	y
person 2	yeah . ever thought about moving to another place ?	そうかー。別の所への引っ越しは考えたことある？	y
person 1	i do but do to this only job for source of income it has been tough	あるわよ。でもね、この仕事が唯一の収入源だから、厳しくって。	y
person 2	understand . starving artist here . i am in france though so it is different .	なるほど。こちらは飢えに苦しむ芸術家。でも僕はフランスに居るから、状況は違うけどね。	y
person 1	i hear france is nice	フランスっていいところだって聞くわ。	y
person 2	it is a beautiful place but i am biased born here .	美しいところなんだけど、僕にはここで生まれたっていうバイアスがかかってるから。	y
person 1	what do you mean biased born	生まれたっていうバイアスがかかってる、っていうのはどういう意味？	y
person 2	i am biased about france being beautiful because i was born in france .	僕はフランスで生まれたから、フランスは美しいっていう先入観を持ってるの。	y
