# Supplementary material
Source: ML conference proceedings conference paper supplement (https://aclanthology.org/2022.eval4nlp-1.9)
Supplement: SupplementaryMaterial [file 1349.xlsx]

## Sheet: Sheet1
person	source	translation	evaluation: is this a good translation?
person 1	hi what do you do	こんにちはどうします ？	n
person 2	i am hanging out with my best friend he is form out of town	私は親友と一緒に町を出ている	n
person 1	good stuff . you see your friend often ?	よくやった友達にはよく会ったな ？	n
person 2	not really , tomorrow we are going to the hockey game	明日はダメだ明日はホッケーゲームに行くんだ	n
person 1	do you like sports . i prefer traveling to anything	スポーツが好きなんだろ何でも好きなんだ	n
person 2	yeah , i like traveling too . i mostly go to mexico every year	私も旅行が好きなの毎年メキシコに行ってるの	y
person 1	i typically will go to either ireland or australia	私は普通でもありませんが	n
person 2	i always wanted to go to ireland	私はいつでも行きたかった	n
person 1	yeah its great . that is where my mother is from	ええ母がここから来たの	n
person 2	that is nice , i am the youngest in my family	いいわね私は家族で一番若いの	y
person 1	i do not have any siblings . do you like them	兄弟はいない好きな兄弟はいないわ	n
person 2	yeah but we fight from time to time	でも今から戦う時が来たんだ	n
person 1	i guess that is normal . do you have any hobbies ?	普通だと思うんだけどホットパイはあるかい ？	n
person 2	yes i love playing video games . how about you ?	ビデオゲームが好きなのあなたは ？	n
