# Supplementary material
Source: ML conference proceedings conference paper supplement (https://aclanthology.org/2022.eval4nlp-1.9)
Supplement: SupplementaryMaterial [file 1349.xlsx]

## Sheet: Sheet1
person	source	translation	evaluation: is this a good translation?
person 1	hi what do you do	こんにちは。何してる人？	y
person 2	i am hanging out with my best friend he is form out of town	私は親友とぶらぶらしてるわ。彼ね、よその町から来てるの。	y
person 1	good stuff . you see your friend often ?	いいねー。ちょくちょく会ってるの？	y
person 2	not really , tomorrow we are going to the hockey game	そうでもないんだけど、明日はね、うちらホッケーの試合に行くんだよ。	y
person 1	do you like sports . i prefer traveling to anything	スポーツ好きなの？僕は何よりも旅行が好き。	y
person 2	yeah , i like traveling too . i mostly go to mexico every year	うん、私も旅行は好きよ。大抵はメキシコに毎年行ってるわ。	y
person 1	i typically will go to either ireland or australia	僕は大抵アイルランドかオーストラリアのどっちかに行くの。	y
person 2	i always wanted to go to ireland	私ね、アイルランドに行ってみたいってずーっと思ってたの。	y
person 1	yeah its great . that is where my mother is from	うん、いいところだよ。うちの母親の出身地なんだ。	y
person 2	that is nice , i am the youngest in my family	それはいいわね。私ね、家族で一番年下なの。	y
person 1	i do not have any siblings . do you like them	僕には一人もきょうだいがいないんだ。キミは自分のきょうだいのこと好き？	y
person 2	yeah but we fight from time to time	うん。でも私たち、たまに喧嘩してるわ。	y
person 1	i guess that is normal . do you have any hobbies ?	それって普通だと思うけど。なんか趣味ある？	y
person 2	yes i love playing video games . how about you ?	あるよ。私はテレビゲームするのが大好きなの。そっちは？	y
