# Supplementary material
Source: ML conference proceedings conference paper supplement (https://aclanthology.org/2022.eval4nlp-1.9)
Supplement: SupplementaryMaterial [file 1350.xlsx]

## Sheet: Sheet1
person	source	translation	evaluation: is this a good translation?
person 1	hi ! how are you this evening ?	こんばんは！調子はどう？	y
person 2	frustrated . i am a 40 year old mom of two high school boys .	イライラしてるわ。こちらは40歳で高校生男子二人のママよ。	y
person 1	understood , i have one son and he is a handful by himself .	わかるわ。うちにも息子がひとりいてね、あの子だけでも手に余ってるし。	y
person 2	they are great kids but i am sick of having to deal with them all the time !	いい子たちなんだけどね、年がら年中あの子たちの相手をしなきゃいけなくって、うんざりしてるの！	y
person 1	you need a break ! i learned mine likes video games , so we play together .	息抜きが必要よ！うちのはゲーム好きってわかったから、一緒にプレイしてるわ。	y
person 2	they are into sports . i do not know the first thing about hockey ball .	うちの子たちはスポーツに夢中なんだけど、私ったらホッケーのホの字も知らないのよねぇ。	y
person 1	i am not into sports either , i would be so lost .	私もスポーツには興味ないし、途方に暮れるだろうなぁ。	y
person 2	then my husband wants nothing to do with me or them . . .	そんでもって旦那ときたら、私とも子供達とも関わりを持ちたくないと・・・。	y
person 1	that can be frustrating . i too am a single mom .	そりゃイライラするでしょうね。私もシンママよ。	y
person 2	we are still married . i guess he just ha other interests .	うちはまだ結婚してるわ。旦那はただ他の事に関心があるみたい。	y
person 1	that must be confusing . i am sorry .	きっと込み入ったことよね。悪かったわ。	y
person 2	it is not your fault . i just need some real friends . i am very lonely .	あなたは悪くないわ。私はただ本当の友達が欲しいだけなの。すごく孤独で。	y
person 1	i understand completely . i never thought parenthood would be loney but it is .	とことん理解できるわ。私ね、親になるのが孤独だなんて思ってもみなかったのに、孤独なものよねぇ。	y
person 2	yeah i guess i just feel everybody is either too young or too old .	まあ、そうかもね。私はね、みんなが若過ぎるか歳を取り過ぎてるって感じがするの。	y
person 1	yes ! i feel like i am in some kind of weird in between age group .	そうなの！年齢層の狭間の、なんか変なところに自分がいるような気がするわ。	y
person 2	a lot of times lately i think i had it so much better before them .	私は最近何度もね、子供ができる前の方がよっぽど良かったなーって思うの。	y
