# Supplementary material
Source: ML conference proceedings conference paper supplement (https://aclanthology.org/2022.eval4nlp-1.9)
Supplement: SupplementaryMaterial [file 1350.xlsx]

## Sheet: Sheet1
person	source	translation	evaluation: is this a good translation?
person 1	hi ! how are you this evening ?	今晩はどうだった ？	n
person 2	frustrated . i am a 40 year old mom of two high school boys .	動揺してたわ私は高校の ４ ０ 歳の男の子の母親よ	n
person 1	understood , i have one son and he is a handful by himself .	私には息子が一人一人一人一人一人一人一人一人の息子が一人一人一人一人一人です	n
person 2	they are great kids but i am sick of having to deal with them all the time !	彼らは偉大な子供だがいつも彼らと取引するのにうんざりだ ！	n
person 1	you need a break ! i learned mine likes video games , so we play together .	ゲームが欲しいならビデオゲームが好きだから一緒に演奏してきたんだ	n
person 2	they are into sports . i do not know the first thing about hockey ball .	スポーツに参加してるんだ最初のホッケーボールなんて知らない	n
person 1	i am not into sports either , i would be so lost .	私もスポーツには参加しないわ私もそうなるわ	n
person 2	then my husband wants nothing to do with me or them . . .	夫は私や彼らに何も関係ないわ	n
person 1	that can be frustrating . i too am a single mom .	私も母親なのよ	n
person 2	we are still married . i guess he just ha other interests .	私たちはまだ結婚しているのよ他にも興味があるわ	n
person 1	that must be confusing . i am sorry .	混乱してるかもしれないごめんね	n
person 2	it is not your fault . i just need some real friends . i am very lonely .	あなたのせいじゃないわ本当の友達が欲しいの	n
person 1	i understand completely . i never thought parenthood would be loney but it is .	親は孤独だとは思ってなかったけど孤独だわ	n
person 2	yeah i guess i just feel everybody is either too young or too old .	誰もが若いと思うんだけど	n
person 1	yes ! i feel like i am in some kind of weird in between age group .	ああ昔から変な感じがするよ	n
person 2	a lot of times lately i think i had it so much better before them .	最近はよくなったと思うよ	n
