# Supplementary material
Source: ML conference proceedings conference paper supplement (https://aclanthology.org/2022.eval4nlp-1.9)
Supplement: SupplementaryMaterial [file 1352.xlsx]

## Sheet: Sheet1
person	source	translation	evaluation: is this a good translation?
person 1	my favorite tv show is game of thrones , whats yours	私が一番気に入ってるテレビ番組はゲーム・オブ・スローンズなんだけど、そっちは？	y
person 2	cake boss ! i make cakes as my job .	ケーキ・ボスよ！私は仕事でケーキ作ってるの。	y
person 1	lol , i have never heard of that show	ウケる―！そんな番組聞いたことないんだけど。	y
person 2	its on the food channel . do you have pets ?	フード・チャンネルでやってるよ。ペットは飼ってる？	y
person 1	no , i wish i did , but i am not allowed to have any	いいや。飼えたらいいんだけどさ、何も飼っちゃいけないことになってるの。	y
person 2	aw . i have a cat . i adore cats .	あらま。うちは猫だよ。私は猫が大好きなの。	y
person 1	i hate those things , i love dogs the most and snakes	私はああいうのは嫌いだな。犬が一番好き。あとヘビも。	y
person 2	i had a snake long ago . an albino bermes python	ヘビならずっと前に飼ってたよ。アルビノビルマニシキヘビ。	y
person 1	that sounds pretty cool , pythons can be really huge	かなり凄そうだね。ニシキヘビって相当でっかくなることがあるし。	y
person 2	girl got up to 11 ft . we had to take her to a breeder in va	あの子ったら11フィートにまでなっちゃって、バージニア州のブリーダーのところに連れて行かなきゃいけなかったの。	y
person 1	you think that is big , my daddy had one up to 20 ft	それで大きいと思ってるんだ。うちのパパは、最長20フィートのを飼ってたよ。	y
person 2	wow ! that is amazing . the live kill feeding must have been expensive !	わー！それはすごい。生き餌だとお金かかってたんでしょうね！	y
person 1	yes it was , i hated having to give it the rats and stuff , yuck	そうそう、かかってたよ。私はネズミとかあげるのが大嫌いだった。オエーだよ。	y
person 2	we gave girl mice as a treat .	うちらはおやつにネズミをあげてたっけ。	y
