# Supplementary material
Source: ML conference proceedings conference paper supplement (https://aclanthology.org/2022.eval4nlp-1.9)
Supplement: SupplementaryMaterial [file 1352.xlsx]

## Sheet: Sheet1
person	source	translation	evaluation: is this a good translation?
person 1	my favorite tv show is game of thrones , whats yours	私のお気に入りのテレビ番組が大好きなの	n
person 2	cake boss ! i make cakes as my job .	私の仕事のケーキをケーキにするわ	n
person 1	lol , i have never heard of that show	今まで聞いたことがない	n
person 2	its on the food channel . do you have pets ?	チャンネルではペットはいるか ？	n
person 1	no , i wish i did , but i am not allowed to have any	いややりたいが何もできない	n
person 2	aw . i have a cat . i adore cats .	猫が好きなんだ猫が好きなんだ	n
person 1	i hate those things , i love dogs the most and snakes	犬とヘビが一番好きなの	n
person 2	i had a snake long ago . an albino bermes python	前に蛇を飼ってたんだ	n
person 1	that sounds pretty cool , pythons can be really huge	すごい音だな	n
person 2	girl got up to 11 ft . we had to take her to a breeder in va	1 1 時に女の子を連れていかなければならなかった	n
person 1	you think that is big , my daddy had one up to 20 ft	パパが 2 0 歳になったと思ってるの ？	n
person 2	wow ! that is amazing . the live kill feeding must have been expensive !	すごいわ命が高価だったのね	n
person 1	yes it was , i hated having to give it the rats and stuff , yuck	ネズミと魚を与えるのが嫌いだったんだ	n
person 2	we gave girl mice as a treat .	女にネズミをあげたんだ	n
