# Supplementary material
Source: ML conference proceedings conference paper supplement (https://aclanthology.org/2022.eval4nlp-1.9)
Supplement: SupplementaryMaterial [file 1353.xlsx]

## Sheet: Sheet1
person	source	translation	evaluation: is this a good translation?
person 1	hi , how are you tonight ?	こんばんは。調子はいかが？	y
person 2	hi ! my and dex my husky are doing great ! you ?	こんばんは！僕もハスキー犬のデックスも調子いいよ！そちらは？	y
person 1	doing good , looking at my ex on facebook wishing we were still together .	調子いいわよ。フェイスブックで元彼のこと見ながら、私たちまだ付き合ってたらなーって思ってるところなの。	y
person 2	do you believe you still need to be together ? when did you break up ?	まだ一緒にいるべきだって君は思ってるの？いつ別れたんだい？	y
person 1	last month , we work together in publishing . he thought i had to many male friends .	先月よ。私たち出版社で一緒に働いてるんだけど、あの人ね、私には男友達が多すぎるって思ってたの。	y
person 2	do you think there is a chance for you to get back together ?	よりを戻すチャンスがあると思う？	y
person 1	i hope so . he loved when i cooked for him and my family .	だといいんだけど。私があの人とかうちの家族にご飯作ってあげると、あの人喜んでくれたのよねぇ。	y
person 2	the way to a mans heart is through his stomach ! do you cook fish ?	男の心をつかむには胃袋からだね！君って魚は料理する？	y
person 1	i agree . yep i cook everything . do you cook ?	その通りよね。ええ、何でも作るわよ。あなたはするの？	n
person 2	not as much as i like eating , especially fish !	食べるのが好きってだけで料理はしてないんだ。とりわけ魚料理はね！	y
person 1	i love to eat , that is why i learned to cook . my mom could not so i had to .	私は食べるの大好きだから、料理を覚えたってわけなの。うちの母が料理できなかったから、私がしなきゃいけなかったし。	y
person 2	its a much useful skill than my nintendo skills ! what hobbies do you have ?	それって、僕の任天堂ゲームの腕前なんかよりずっと実用的だよ！君にはどんな趣味があるの？	y
person 1	i used to play box , now i just watch tv .	昔はボクシングやってたけど、今はテレビを観てるだけ。	y
person 2	here in the north , there are not too many things to do . i like rc cars racing .	ここ北部だと、やることがあんまり多くはないんだよねぇ。僕はね、ラジコンカーでレースするのが好きなの。	y
person 1	yeah its too cold most of the year to do anything i guess .	そうね、1年の大半は何をするにも寒すぎるんでしょうね。	y
person 2	it is ! will you try to get back together with your ex ?	そうなんだよ！君は元カレとよりを戻してみるつもり？	y
