# Supplementary material
Source: ML conference proceedings conference paper supplement (https://aclanthology.org/2022.eval4nlp-1.9)
Supplement: SupplementaryMaterial [file 1353.xlsx]

## Sheet: Sheet1
person	source	translation	evaluation: is this a good translation?
person 1	hi , how are you tonight ?	今晩はどうだった ？	n
person 2	hi ! my and dex my husky are doing great ! you ?	こんにちは私とスキー元気か ？	n
person 1	doing good , looking at my ex on facebook wishing we were still together .	よくやった元妻の顔を見て一緒に過ごしたいと願ってた	n
person 2	do you believe you still need to be together ? when did you break up ?	あなたはまだ一緒にいる必要があると信じていますいつ別れたのですか ？	n
person 1	last month , we work together in publishing . he thought i had to many male friends .	先月、我々は出版社で一緒に働いていました多くの男性と友達が必要だと思っていました	n
person 2	do you think there is a chance for you to get back together ?	一緒に戻れるチャンスがあると思う ？	n
person 1	i hope so . he loved when i cooked for him and my family .	そう願ってるわ家族と料理する時は彼が好きだった	n
person 2	the way to a mans heart is through his stomach ! do you cook fish ?	腹が減った魚を料理したのか ？	n
person 1	i agree . yep i cook everything . do you cook ?	もちろん料理は全部作るよ料理は作る ？	n
person 2	not as much as i like eating , especially fish !	特に魚は食べないわよ ！	n
person 1	i love to eat , that is why i learned to cook . my mom could not so i had to .	だから食べるのが好きなのママが料理を教えてくれたの	n
person 2	its a much useful skill than my nintendo skills ! what hobbies do you have ?	私の能力より役に立つのよ何を持ってるの ？	n
person 1	i used to play box , now i just watch tv .	今はテレビを見てたんだ	n
person 2	here in the north , there are not too many things to do . i like rc cars racing .	北の車が好きなんだ	n
person 1	yeah its too cold most of the year to do anything i guess .	そうだな今年は寒すぎる	n
person 2	it is ! will you try to get back together with your ex ?	元の元カレと一緒に戻れる ？	n
