# Supplementary material
Source: ML conference proceedings conference paper supplement (https://aclanthology.org/2022.eval4nlp-1.9)
Supplement: SupplementaryMaterial [file 1355.xlsx]

## Sheet: Sheet1
person	source	translation	evaluation: is this a good translation?
person 1	hello . how are you doing today ?	こんにちは。調子はどう？	y
person 2	i m good how are you ?	いいわよ。そっちは調子どう？	y
person 1	not bad , what are some of your hobbies ?	まあまあかな。趣味はなに？	y
person 2	i love going to walt disney world every year	私はね、毎年ディズニーワールドに行くのがお気に入りなの。	y
person 1	every year ? that is a lot . i enjoy listening to classic rock music and watching basketball .	毎年？そりゃ多いなー。僕はね、クラシック・ロックを聴いたり、バスケを観るのが大好き。	y
person 2	i love reading crime novels to relax and i walk my two dogs	私は犯罪小説を読んでリラックスしたり、うちの犬二匹を散歩させるのが大好きよ。	y
person 1	what do you do for a living ?	仕事はなに？	y
person 2	i am a secretary for an insurance agency , what do u do ?	保険代理店の事務をやってるわ。そっちの仕事は？	y
person 1	i work at a shop that makes smoothies and vegetarian food .	スムージーとか菜食主義者向けの食品を作ってる店で働いてるよ。	y
person 2	that is very healthy for u	それはとっても健康的ね。	y
person 1	yeah , well , vegetarian food is my favorite , so it works well for me .	そうなんだよ。ま、菜食主義者向けの食べ物が僕の好物だし、僕には合ってるね。	y
person 2	would you like to trade jobs lol	仕事取り換えっこしない（笑）？	y
