# Supplementary material
Source: ML conference proceedings conference paper supplement (https://aclanthology.org/2022.eval4nlp-1.9)
Supplement: SupplementaryMaterial [file 1355.xlsx]

## Sheet: Sheet1
person	source	translation	evaluation: is this a good translation?
person 1	hello . how are you doing today ?	こんにちは今日はどうですか ？	y
person 2	i m good how are you ?	気分はどう ？	n
person 1	not bad , what are some of your hobbies ?	悪くないわ何か悪いことでも ？	n
person 2	i love going to walt disney world every year	毎年世界を荒廃させるのが好きなんだ	n
person 1	every year ? that is a lot . i enjoy listening to classic rock music and watching basketball .	クラシック音楽とバスケを観てるのが楽しい	n
person 2	i love reading crime novels to relax and i walk my two dogs	犯罪小説を読んでリラックスして犬を散歩するのが好き	n
person 1	what do you do for a living ?	何のために生きるの ？	n
person 2	i am a secretary for an insurance agency , what do u do ?	保険会社の秘書なんだどうする ？	n
person 1	i work at a shop that makes smoothies and vegetarian food .	店で働いてるのはベジタリアンとベジタリアンの料理店よ	n
person 2	that is very healthy for u	それは非常に健康です	n
person 1	yeah , well , vegetarian food is my favorite , so it works well for me .	ベジタリアンの料理は私のお気に入りだからうまくいってるわ	n
person 2	would you like to trade jobs lol	仕事の交換をしたいなら	n
