# Supplementary material
Source: ML conference proceedings conference paper supplement (https://aclanthology.org/2022.eval4nlp-1.9)
Supplement: SupplementaryMaterial [file 1356.xlsx]

## Sheet: Sheet1
person	source	translation	evaluation: is this a good translation?
person 1	hey , do you think its weird to like unicorns as an adult ?	子供の頃と同じように奇妙だと思うか ？	n
person 2	google makes me think nothing is wierd that is where i work .	俺が働いている場所は何も考えていない	n
person 1	well that is a relief . i like other things , too . like playing pool	安心した他にもプールのようなものがある	n
person 2	i like pool halls sometimes i eat lobster rolls at their seafood bar .	時々コシェボコペコのロブスターを食べたい	n
person 1	seafoods okay , but my favorite is egyptian food .	私の好きな料理はドイツ料理です	n
person 2	i visited egypt when i was an intern for google .	私はグリッグのためにインターンしていたときに会いに来たの	n
person 1	that is amazing ! my dream is to see the pyramids .	私の夢はピラミッドを見ることよ	n
person 2	yes pyramids are terrific . much better than scenery here in seattle .	ピラミッドは素晴らしいここより良い眺めだ	n
person 1	i would love to see the pyramids and write a book about it .	ピラミッドと本を書きたいんだ	n
person 2	that is a great idea to write a book .	本を書くのはいい考えだ	y
person 1	sounds like i should intern at google first .	最初にグライダーでインターンした方がいいと思うわ	n
person 2	yes you can start a internship online .	はい、オンラインオンラインで調整できるようになります	n
person 1	thanks i will have to look into it .	調べておきます	n
person 2	yes it is really fun	楽しいよ	n
person 1	sounds like it . better than sitting around here shooting pool .	プールの周りに座った方がいいと思う	n
person 2	yes they pay you to have fun and travel .	楽しい旅をしないとね	n
