# Supplementary material
Source: ML conference proceedings conference paper supplement (https://aclanthology.org/2022.eval4nlp-1.9)
Supplement: SupplementaryMaterial [file 1356.xlsx]

## Sheet: Sheet1
person	source	translation	evaluation: is this a good translation?
person 1	hey , do you think its weird to like unicorns as an adult ?	ねえ、大人になってもユニコーンが好きなのって変だと思う？	y
person 2	google makes me think nothing is wierd that is where i work .	グーグル見てるとさ、変なことなんて何もないんだって気がしてくるよ。僕の職場はあそこなの。	y
person 1	well that is a relief . i like other things , too . like playing pool	やれやれ、これでホッとしたわ。私には他にも好きなものがあるんだけど。ビリヤードとか。	y
person 2	i like pool halls sometimes i eat lobster rolls at their seafood bar .	僕もビリヤード場が気に入ってて、時々そこのシーフードのカウンターでロブスター・ロールを食べてるよ。	y
person 1	seafoods okay , but my favorite is egyptian food .	シーフードはまあまあかなぁ。私の一番好きな食べ物はね、エジプト料理なの。	y
person 2	i visited egypt when i was an intern for google .	僕はグーグルの見習い時代に、エジプトに行ってきたよ。	y
person 1	that is amazing ! my dream is to see the pyramids .	すごーい！私の夢はピラミッドを見ることなの。	y
person 2	yes pyramids are terrific . much better than scenery here in seattle .	そうさ、ピラミッドは素晴らしかったよ。ここシアトルよりも、はるかにいい景色だった。	y
person 1	i would love to see the pyramids and write a book about it .	私も是非ピラミッド見物して、本にしたいわ。	y
person 2	that is a great idea to write a book .	本にするのは素晴らしいアイデアだね。	y
person 1	sounds like i should intern at google first .	私もまずはグーグルで研修するべきって感じね。	y
person 2	yes you can start a internship online .	そうさ、オンラインで実務研修を始められるんだよ。	y
person 1	thanks i will have to look into it .	ありがとう。調べてみなくっちゃ。	y
person 2	yes it is really fun	そうだよ、マジで面白いよ。	y
person 1	sounds like it . better than sitting around here shooting pool .	そのようね。ここでだらだらとビリヤードやってるよりかマシだわ。	y
person 2	yes they pay you to have fun and travel .	そうさ。お給料をもらって楽しんだり旅行したりするんだよ。	y
