# Supplementary material
Source: ML conference proceedings conference paper supplement (https://aclanthology.org/2022.eval4nlp-1.9)
Supplement: SupplementaryMaterial [file 1359.xlsx]

## Sheet: Sheet1
person	source	translation	evaluation: is this a good translation?
person 1	hello	こんにちは	y
person 2	howdy ! how are you ? my name is shannon . yours ?	こんにちは！調子はどう？私はシャノン。あなたは？	y
person 1	i am dave .	デイブ。	y
person 2	where are you from ?	出身は？	y
person 1	cali . . . u ?	カリ・・・そちらは？	n
person 2	ny . wow what a distance between us ! weather there is awesome i heard !	ニューヨーク。うわー、かなり遠いね。そっちは気候がすごくいいらしいね。	y
person 1	its been super hot lately . hows the weather there ?	最近ものすごく暑いよ。そっちはどう？	y
person 2	chilly and rainy , not like the ocean i just came home from	肌寒くて雨ばかりで、ちょっと前に行った海とは大違い。	y
person 1	what ocean ?	どこの海？	y
person 2	well atlantic , but still . haha ever been to east coast ?	えーっと、大西洋なんだけど、でもまあね。はは。東海岸には行ったことがある？	n
person 1	i meant the name	海の名前のこどたっだんだけど。	y
person 2	the atlantic ocean , over by wight bay , southern maryland	南メリーランドのワイト湾の先の大西洋だよ。	y
