# Supplementary material
Source: ML conference proceedings conference paper supplement (https://aclanthology.org/2022.eval4nlp-1.9)
Supplement: SupplementaryMaterial [file 1359.xlsx]

## Sheet: Sheet1
person	source	translation	evaluation: is this a good translation?
person 1	hello	おはようございます	y
person 2	howdy ! how are you ? my name is shannon . yours ?	おはよう名前はタネンよ	n
person 1	i am dave .	俺はダイだ	n
person 2	where are you from ?	出身はどこだ ？	y
person 1	cali . . . u ?	オーリー ？	n
person 2	ny . wow what a distance between us ! weather there is awesome i heard !	楽しい天気だったわね	n
person 1	its been super hot lately . hows the weather there ?	最近は超暑い天気だったのか ？	n
person 2	chilly and rainy , not like the ocean i just came home from	（ 徹信 ） 雨と雨は海のように遠くから帰ってきたんだ	n
person 1	what ocean ?	（ 明信 ） 海って ？	n
person 2	well atlantic , but still . haha ever been to east coast ?	今でも東に行ったことは ？	n
person 1	i meant the name	つまり名前は ？	n
person 2	the atlantic ocean , over by wight bay , southern maryland	地平海の向こう、南、南カリフォルニア州	n
