# Supplementary material
Source: ML conference proceedings conference paper supplement (https://aclanthology.org/2022.eval4nlp-1.9)
Supplement: SupplementaryMaterial [file 1360.xlsx]

## Sheet: Sheet1
person	source	translation	evaluation: is this a good translation?
person 1	hi how are you today	こんにちは今日は	n
person 2	hello there . i am doing pretty well and you ?	こんにちは元気ですか ？	n
person 1	i am good how is the weather	天気はどうだ ？	n
person 2	it is a bit chilly but nice .	静かだけどいいわね	n
person 1	do you play many games ?	ゲームはたくさん ？	n
person 2	not really . i like to write poetry and sing though .	でも詩と歌を書くのが好きなんだ	n
person 1	oh i am a pro league of legends player	僕は伝説の英雄だ	n
person 2	oh wow . i am guessing you play it often .	ああ、よく演奏してくれたね	n
person 1	yeah you have to be on top of your game	ああ、君はゲームのトップになった方がいいよ	n
person 2	do you play with your friends ?	友達と遊びますか ？	n
person 1	with my pro team , my friends are no match	プロのチームにはマッチがない	n
person 2	oh , i see . what else do you like to do ?	そうか他にどうする ？	n
person 1	i enjoy my dogs a lot	犬を楽しんでるんだ	n
person 2	oh , how many do you have ?	何人いるの ？	n
