# Supplementary material
Source: ML conference proceedings conference paper supplement (https://aclanthology.org/2022.eval4nlp-1.9)
Supplement: SupplementaryMaterial [file 1360.xlsx]

## Sheet: Sheet1
person	source	translation	evaluation: is this a good translation?
person 1	hi how are you today	こんにちは、調子はどう？	y
person 2	hello there . i am doing pretty well and you ?	こんにちは。元気。そっちは？	y
person 1	i am good how is the weather	元気だよ。天気はどう？	y
person 2	it is a bit chilly but nice .	少し肌寒いけどいい感じだよ。	y
person 1	do you play many games ?	ゲームは色々する？	n
person 2	not really . i like to write poetry and sing though .	そうでもない。詩を書いたり歌うのは好きだけど。	y
person 1	oh i am a pro league of legends player	へえ、僕はリーグ・オブ・レジェンドのプロプレイヤーなんだ。	y
person 2	oh wow . i am guessing you play it often .	うわー。よくゲームをするんだろうね。	y
person 1	yeah you have to be on top of your game	うん。ゲームで上位にいないといけないんだ。	n
person 2	do you play with your friends ?	友達とはゲームをする？	y
person 1	with my pro team , my friends are no match	プロチームとする。友達とは対戦にならないんだ。	y
person 2	oh , i see . what else do you like to do ?	あー、なるほど。他には何が好き？	y
person 1	i enjoy my dogs a lot	犬が大好き。	y
person 2	oh , how many do you have ?	へえ、何匹飼ってるの？	y
