# Supplementary material
Source: ML conference proceedings conference paper supplement (https://aclanthology.org/2022.eval4nlp-1.9)
Supplement: SupplementaryMaterial [file 1365.xlsx]

## Sheet: Sheet1
person	source	translation	evaluation: is this a good translation?
person 1	hi , how are you doing ?	調子はどうだ ？	n
person 2	pretty good . just got back from a long haul my back is killing me !	よかった戻ってきてからずっと私を殺してくれたのよ ！	n
person 1	are you a truck driver ? i work in an md office .	君は運転手か ？	n
person 2	i am ! that sounds like a nice life . i am from a blue collar background myself	素敵な人生だと思うわ私自身はブルージャケットから来たの	n
person 1	i am a medical assistant , still blue collar but hope to go to nursing school .	私は医療助手でブルー襟学校に行きたいと願うわ	n
person 2	good for you ! mama , god rest her soul , was a teacher , daddy was a cop	お母さんのために頑張ったわお母さん、彼女の魂は医者だったの	n
person 1	what do you like to do for fun ?	何が楽しいんだ ？	n
person 2	nap ! haha not much . i am a boring guy . you ?	退屈で退屈な男だ	n
person 1	reading . hanging out with my dogs . and flowers , especially lilies .	犬と一緒に出て行って特に花は嘘だ	n
person 2	lillies you say ? you grow them ? or just like em much	いじめっ子って言ったのか ？ それとも大きくなったのか ？	n
person 1	i wish i could grow them . live in an apartment .	成長したいんだ家の中で生きたいんだ	n
person 2	oh i see . i am in an apt i am never in . you know how to drive a stick ?	そうか俺はペコペコだ運転できるか ？	n
person 1	no , i mainly ride by bike or take the bart .	いや自転車か芸術家を連れて行くよ	n
person 2	whats the bart ? i am a country boy , lol	私は国の子供です	n
person 1	bay area rapid transit . i live in san francisco ,	急いでシスコに住んでいます	n
person 2	oh i see ! wow , i have heard wonderful things . do not get much truck routes that way	いい話を聞いたことがあるトラックに乗っていくのはあまりないな	n
