# Supplementary material
Source: ML conference proceedings conference paper supplement (https://aclanthology.org/2022.eval4nlp-1.9)
Supplement: SupplementaryMaterial [file 1365.xlsx]

## Sheet: Sheet1
person	source	translation	evaluation: is this a good translation?
person 1	hi , how are you doing ?	こんにちは、調子はどうですか？	y
person 2	pretty good . just got back from a long haul my back is killing me !	元気です。長距離から戻ってきたばかりで、腰が痛いです。	y
person 1	are you a truck driver ? i work in an md office .	トラック運転手をされてるんですか？私は医療機関で働いています。	y
person 2	i am ! that sounds like a nice life . i am from a blue collar background myself	そうです。良さげな人生を送られてますね。私自身はブルーカラー出身です。	y
person 1	i am a medical assistant , still blue collar but hope to go to nursing school .	私は医療助手で一応ブルーカラーですが、看護学校に通えればと思っています。	y
person 2	good for you ! mama , god rest her soul , was a teacher , daddy was a cop	それはいいですね！亡くなった私の母は教師で、父は警察官をしてました。	y
person 1	what do you like to do for fun ?	ご趣味は？	y
person 2	nap ! haha not much . i am a boring guy . you ?	ない！はは、あまりありません。つまらない男です。あなたは？	y
person 1	reading . hanging out with my dogs . and flowers , especially lilies .	読書、犬と遊ぶこと、花、特にゆりです。	y
person 2	lillies you say ? you grow them ? or just like em much	ゆり、とおっしゃいましたか？育ててるんですか？それともただすごく好きということですか？	y
person 1	i wish i could grow them . live in an apartment .	育てられたらいいなと思うんですけど、アパートに住んでいるので。	y
person 2	oh i see . i am in an apt i am never in . you know how to drive a stick ?	あー、なるほど。私はほぼ不在のアパートに住んでいます。マニュアル車を運転できますか？	y
person 1	no , i mainly ride by bike or take the bart .	いいえ、よく自転車かバートに乗ります。	y
person 2	whats the bart ? i am a country boy , lol	バートって何ですか？田舎者なので（笑）	y
person 1	bay area rapid transit . i live in san francisco ,	ペイエリア高速鉄道です。サンフランシスコに住んでいます。	y
person 2	oh i see ! wow , i have heard wonderful things . do not get much truck routes that way	あー、なるほど！うわー、素晴らしいって聞いています。そちら方面にはあまりトラック路線がないんです。	y
