# Supplementary material
Source: ML conference proceedings conference paper supplement (https://aclanthology.org/2022.eval4nlp-1.9)
Supplement: SupplementaryMaterial [file 1366.xlsx]

## Sheet: Sheet1
person	source	translation	evaluation: is this a good translation?
person 1	just had my third hamburger of the day ! !	今日3個目のハンバーガーを食べたところです！	y
person 2	that sound good sound like you a hamburger lover	いいですね。ハンバーガー好きなんですね。	y
person 1	i often eat meat to make up for what i had to eat in the army !	軍隊で食べられなかった反動でよく肉を食べます。	y
person 2	ok , i under stand that how long in the army	そうですか、分かります。軍隊にはどのぐらいいたんですか？	y
person 1	long enough to be a vet . to get the gi bill . i am earning a ba .	退役軍人となって復員兵援護法を得られるのに十分な期間です。学士号を取得しようとしているところです。	y
person 2	that good , am just a country girl love to do garden work	それはいいですね。私は庭いじりが大好きな田舎女子です。	y
person 1	my girlfriend loves to garden . i , in turn , love her .	僕の彼女も庭いじりが好きです。僕はそれと同じぐらい彼女のことが大好きです。	y
person 2	ok glad she love it , i also work at the animal shelter	そうですか。彼女が庭いじり好きで良かったです。私は動物保護施設でも働いています。	y
person 1	you sound busy . i met someone who worked there . what else you do ?	お忙しそうですね。そこで働く人と知り合いになりました。他には何をしていますか？	y
person 2	like to go to church and spear time fish	教会に行ったり、時間がある時は釣りをするのが好きです。	n
person 1	so at church you are a fisher of men , and also a fisher of time ?	つまり教会では福音伝道者であり、釣り人でもあるということですね？	y
person 2	yes you have that correct that what i do	はい、私がしていることに関しては、まさにそんな感じです。	y
person 1	gotcha ! my girlfriend goes to church , but i still love here .	分かりました！僕の彼女は教会に行きますが、それでも僕は彼女が好きです。	y
person 2	that good you should keeping on loving her	いいですね。彼女のことをずっと好きでい続けるべきです。	y
person 1	so tell me more about yourself , please .	ではあなたのことをもっと教えて下さい。	y
person 2	well i am a care giver and love traveling	えーと、私は介護士で旅行好きです。	y
