# Supplementary material
Source: ML conference proceedings conference paper supplement (https://aclanthology.org/2022.eval4nlp-1.9)
Supplement: SupplementaryMaterial [file 1366.xlsx]

## Sheet: Sheet1
person	source	translation	evaluation: is this a good translation?
person 1	just had my third hamburger of the day ! !	私のハンバーガーは 3 杯だけだった ！	n
person 2	that sound good sound like you a hamburger lover	ハンバーガーみたいな音がするわね	n
person 1	i often eat meat to make up for what i had to eat in the army !	私は何度も肉を食べてきた私が軍で食べなければならなかったもののために ！	n
person 2	ok , i under stand that how long in the army	わかった、私は軍でどのくらい立っているのか	n
person 1	long enough to be a vet . to get the gi bill . i am earning a ba .	根屋になるには十分な時間がかかるわ	n
person 2	that good , am just a country girl love to do garden work	いいわねただの女の子よ庭仕事が好きなだけよ	n
person 1	my girlfriend loves to garden . i , in turn , love her .	彼女は庭が好きなんだ彼女を愛してるんだ	n
person 2	ok glad she love it , i also work at the animal shelter	彼女も喜んで動物シェルターで働いてた	n
person 1	you sound busy . i met someone who worked there . what else you do ?	忙しいみたいね他に何をしてるの ？	n
person 2	like to go to church and spear time fish	教会に行きたい時は槍と槍の時間だ	n
person 1	so at church you are a fisher of men , and also a fisher of time ?	教会では君は男の掃除人だなそして時間の問題も解決するのか ？	n
person 2	yes you have that correct that what i do	その通りだ	n
person 1	gotcha ! my girlfriend goes to church , but i still love here .	俺の彼女は教会に行くがまだ愛してる	n
person 2	that good you should keeping on loving her	彼女を愛しているほうがいい	n
person 1	so tell me more about yourself , please .	もっと自分のことを話してくれないか	n
person 2	well i am a care giver and love traveling	僕はギバーと恋をしているんだ	n
