# Supplementary material
Source: ML conference proceedings conference paper supplement (https://aclanthology.org/2022.eval4nlp-1.9)
Supplement: SupplementaryMaterial [file 1367.xlsx]

## Sheet: Sheet1
person	source	translation	evaluation: is this a good translation?
person 1	hi , how are ya sweetie ?	こんにちは！調子はどうですか？	y
person 2	well , i am having a tough time telling my parents i am gay .	えーっと、同性愛者だということを親に言えずに辛いです。	y
person 1	wow , that is a big moment . i wish i had some advice for you	うわー、それは大変ですね。何かアドバイスが出来たら良かったんですけど。	y
person 2	i just bury myself in welding or gaming whenever i think about telling them .	親に伝えることを思うたびに、ただただ溶接やゲームに没頭してます。	y
person 1	well nothing wrong with that sugar !	えーと、あなたは何も間違ってませんよ！	y
person 2	i make great money as a welder . what do you do ?	私は溶接工として結構稼いでます。お仕事は何をされてますか？	y
person 1	accounting . but hobbies mean to me than my job . i am going on a european cruise !	経理ですけど、仕事よりも趣味が大事です。ヨーロッパクルーズに行く予定なんです！	y
person 2	that will be fun . i almost took a job on a cruise ship as a guitarist .	それは楽しそうですね。クルーズ船のギターリストとして働こうとしたことがあります。	y
person 1	oh cool ! i have always what it would be like to work on a cruise ship	おー、凄い！クルーズ船で働くってどんな感じだろうな、って常々思ってきたんですよ。	y
person 2	i think it would have been fun but welding pays so well .	楽しいでしょうけど、溶接の稼ぎがとてもいいんです。	y
person 1	it sounds like you have got alot going for you . i think you would like my cats	色んなことに直面してるみたいですね。私の猫のこと気に入るかもしれませんね。	y
person 2	i love cats . how many do you have ?	猫は大好きです。何匹飼ってるんですか？	y
person 1	i am a breeder for maine coon cats . right now i have about . . . 37 .	私はメインクーンのブリーダーをしています。今は・・・37匹ぐらいです。	y
person 2	wow ! ! that is a lot of cats .	うわー！たくさんいますね。	y
