# Supplementary material
Source: ML conference proceedings conference paper supplement (https://aclanthology.org/2022.eval4nlp-1.9)
Supplement: SupplementaryMaterial [file 1367.xlsx]

## Sheet: Sheet1
person	source	translation	evaluation: is this a good translation?
person 1	hi , how are ya sweetie ?	元気だった ？	n
person 2	well , i am having a tough time telling my parents i am gay .	両親がゲイだって言うのは辛いわ	n
person 1	wow , that is a big moment . i wish i had some advice for you	それは大変だねアドバイスがあるんだけど	n
person 2	i just bury myself in welding or gaming whenever i think about telling them .	私自身を歓迎するかゲームのことを考えるか自分を埋葬しただけだ	n
person 1	well nothing wrong with that sugar !	その砂糖に問題はない ！	n
person 2	i make great money as a welder . what do you do ?	私は大歓迎金を作るわあなたはどうするの ？	n
person 1	accounting . but hobbies mean to me than my job . i am going on a european cruise !	仕事よりマシだけど私よりマシなのよ	n
person 2	that will be fun . i almost took a job on a cruise ship as a guitarist .	楽しいよギター奏者として仕事をしてきたんだ	n
person 1	oh cool ! i have always what it would be like to work on a cruise ship	クールだな俺はいつもクルーズ船で仕事をしたいんだ	n
person 2	i think it would have been fun but welding pays so well .	楽しいと思うけど給料がかかるからな	n
person 1	it sounds like you have got alot going for you . i think you would like my cats	猫が好きなようだな	n
person 2	i love cats . how many do you have ?	猫が好きなんだ何人いる ？	n
person 1	i am a breeder for maine coon cats . right now i have about . . . 37 .	猫には 3 7 人のことがある	n
person 2	wow ! ! that is a lot of cats .	猫が多すぎるわ	n
