# Supplementary material
Source: ML conference proceedings conference paper supplement (https://aclanthology.org/2022.eval4nlp-1.9)
Supplement: SupplementaryMaterial [file 1368.xlsx]

## Sheet: Sheet1
person	source	translation	evaluation: is this a good translation?
person 1	hello there , how are you ?	こんにちは、調子はどうですか？	y
person 2	i am doing great , how are you ?	元気です。あなたは？	y
person 1	oh , i am doing well , i just got home from work .	まあ、調子はいいです。たった今、仕事から帰ってきたところです。	y
person 2	i just got done working also . been spending some time on the computer .	私もちょうど仕事が終わったところです。ずっとコンピューターを使っていました。	y
person 1	oh , you are into computers ? i work as a software engineer at google .	へえ、コンピュータが好きなんですか？私はグーグルでソフトウエアのエンジニアとして働いています。	y
person 2	yes , i am a magazine distribution manager for vogue .	はい。私はヴォーグの雑誌流通管理者をしています。	y
person 1	oh , where do you work ? i know there is a vogue office here in seattle .	へえ、勤務先はどちらですか？ここシアトルにヴォーグのオフィスがあるのは知ってます。	y
person 2	i have been to seattle . it is a nice place . i live and work in nyc .	シアトルに行ったことがあります。いいところです。私は住まいも仕事もニューヨークです。	y
person 1	i visited new york once , they have really good seafood there .	ニューヨークには一度行ったことがあります。シーフードが本当においしいですね。	y
person 2	seattle has good seafood also . do you have a family ?	シアトルもシーフードが美味しいですよね。ご家族はいらっしゃいますか？	y
person 1	no , i live alone with my cat .	いいえ、私一人で猫と住んでます。	y
person 2	oh , i love cats . i am looking to redecorate my room in yellow .	おー、猫は大好きです。自分の部屋を黄色に改装しようかと思っているところです。	y
person 1	oh . okay , well , to each their own , i suppose .	おおー、そうですか。えっと、人それぞれですよね、おそらく。	y
person 2	yes i suppose . do you like video games ?	ええ、多分。ビデオゲームは好きですか？	y
person 1	not really , i spend all day working on computers .	いいえ、あまり。1日の大半をコンピュータを使って過ごしています。	y
person 2	what do you like to do ?	何をするのが好きですか？	y
