# Supplementary material
Source: ML conference proceedings conference paper supplement (https://aclanthology.org/2022.eval4nlp-1.9)
Supplement: SupplementaryMaterial [file 1368.xlsx]

## Sheet: Sheet1
person	source	translation	evaluation: is this a good translation?
person 1	hello there , how are you ?	こんにちは、こんにちは、こんにちは、お元気ですか ？	n
person 2	i am doing great , how are you ?	元気か ？	n
person 1	oh , i am doing well , i just got home from work .	仕事から帰ってきたばかりなんだ	n
person 2	i just got done working also . been spending some time on the computer .	俺も仕事をしてきたコンピューターで時間を過ごしてたんだ	n
person 1	oh , you are into computers ? i work as a software engineer at google .	コンピューターに入ってるの ？	n
person 2	yes , i am a magazine distribution manager for vogue .	そうだよ雑誌監督だ	n
person 1	oh , where do you work ? i know there is a vogue office here in seattle .	どこで仕事をしてるんだ ？	n
person 2	i have been to seattle . it is a nice place . i live and work in nyc .	ここは良い場所だし仕事も仕事もあるし	n
person 1	i visited new york once , they have really good seafood there .	新しいトークを見たの彼らは本当に良い食事をしてるわ	n
person 2	seattle has good seafood also . do you have a family ?	牛にも良い食事がある家族はいるか ？	n
person 1	no , i live alone with my cat .	いや猫と二人で住んでる	n
person 2	oh , i love cats . i am looking to redecorate my room in yellow .	猫は大好きだ黄色の部屋を借りたいんだ	n
person 1	oh . okay , well , to each their own , i suppose .	そうかじゃあ自分の部屋に戻ってくれ	n
person 2	yes i suppose . do you like video games ?	ビデオゲームは好きか ？	n
person 1	not really , i spend all day working on computers .	一日中パソコンで働いてたんだ	n
person 2	what do you like to do ?	***	n
