# Supplementary material
Source: ML conference proceedings conference paper supplement (https://aclanthology.org/2022.eval4nlp-1.9)
Supplement: SupplementaryMaterial [file 1369.xlsx]

## Sheet: Sheet1
person	source	translation	evaluation: is this a good translation?
person 1	hi how are you doing	こんにちは。調子はどう？	y
person 2	i am great . how are you ?	元気。そちらは？	y
person 1	i am good getting back from band practice	元気だよ。バンドの練習から戻ってきたところなんだ。	y
person 2	what do you play in the band	バンドでは何を演奏するの？	y
person 1	a small punk band just for fun	趣味でやってる小さなパンクバンドだよ。	y
person 2	what is the name of the band	バンド名は何？	y
person 1	its called the purple computers	パープル・コンピューターズっていうんだ。	y
person 2	that sounds cool . do you like technology ?	かっこいいね。テクノロジーは好き？	y
person 1	i do but i prefer writing	うん、でも書く方が好き。	y
person 2	what do you like to write	何を書くのが好きなの？	y
person 1	i like poetry i think i think it helps with my songs	詩だよ。自分の曲を書くのに役立つと思うんだ。	y
person 2	do you write a lot of it	たくさん書くの？	y
person 1	i do its my main job	うん、それが主な仕事なんだ。	y
person 2	do you get paid well for it	それでたくさん稼いでる？	y
