# Supplementary material
Source: ML conference proceedings conference paper supplement (https://aclanthology.org/2022.eval4nlp-1.9)
Supplement: SupplementaryMaterial [file 1369.xlsx]

## Sheet: Sheet1
person	source	translation	evaluation: is this a good translation?
person 1	hi how are you doing	元気か ？	n
person 2	i am great . how are you ?	元気だよ元気か ？	y
person 1	i am good getting back from band practice	バンドの練習から戻ってきたわ	n
person 2	what do you play in the band	バンドで演奏するのがうまいー	n
person 1	a small punk band just for fun	ただ楽しいバンドだよ	n
person 2	what is the name of the band	バンドの名前は何だ ？	y
person 1	its called the purple computers	紫のコンピュータと呼ばれている	n
person 2	that sounds cool . do you like technology ?	いいだろう技術は好きか ？	n
person 1	i do but i prefer writing	でも書きたいんだ	n
person 2	what do you like to write	何を書きたいんだ ？	y
person 1	i like poetry i think i think it helps with my songs	I like a poetry I like m y song I think i t 's help m y song with m y song with m y song (私はそれが私の歌に役立つ)	n
person 2	do you write a lot of it	You write a lot o f i t much a s much a lot (あなたはそれをたくさん書く)	n
person 1	i do its my main job	I 'm the main work for m y top work	n
person 2	do you get paid well for it	You' d pay i t for i t for i t for i t	n
