# Supplementary material
Source: ML conference proceedings conference paper supplement (https://aclanthology.org/2022.eval4nlp-1.9)
Supplement: SupplementaryMaterial [file 1373.xlsx]

## Sheet: Sheet1
person	source	translation	evaluation: is this a good translation?
person 1	hi , i am a single mom with a two year old son .	２ 歳の息子と一人の母親です	n
person 2	hi ! its nice to meet you .	会えて嬉しいよ	n
person 1	nice to meet you too . what do you like to do for fun ?	こちらこそ何を楽しんでる ？	n
person 2	this is weird maybe but i like watching cartoons . you ?	変かもしれないがアニメが好きなんだ	n
person 1	i watch them with my son . i also put him on my horse with me .	息子と一緒に馬に乗って一緒に馬に乗せたんだ	n
person 2	horses are beautiful , but i prefer watersports . any kind of water really .	馬は美しいが水飲みが好きなんだ水が好きなんだ	n
person 1	i love the beach and collecting seashells . so relaxing .	ビーチを愛してるから落ち着いて	n
person 2	have you ever relaxed on the beach and had someone read to you ? i love that .	ビーチでリラックスして誰かに読んだことは ？	n
person 1	never had that but it sure sounds nice . i sometimes hold yoga on the beach .	いい話だけど海で待ってる時もあるわ	n
person 2	that is cool ! i started doing yoga after i moved out when i was a teenager .	いいわね子供の頃からヨガが引っ越してきたの	n
person 1	i teach it and my morning classes i love to have on the beach .	朝の授業を教えてビーチに行きたいんだ	n
person 2	i wish my mom would do that with me . she is too busy .	ママも同じことをしたいし忙しいんだ	n
