# Supplementary material
Source: ML conference proceedings conference paper supplement (https://aclanthology.org/2022.eval4nlp-1.9)
Supplement: SupplementaryMaterial [file 1373.xlsx]

## Sheet: Sheet1
person	source	translation	evaluation: is this a good translation?
person 1	hi , i am a single mom with a two year old son .	こんにちは。2歳の息子がいるシングルマザーです。	y
person 2	hi ! its nice to meet you .	こんにちは。はじめまして。	y
person 1	nice to meet you too . what do you like to do for fun ?	はじめまして。趣味は何ですか？	y
person 2	this is weird maybe but i like watching cartoons . you ?	変かもしれませんけど、アニメを見るのが好きです。あなたは？	y
person 1	i watch them with my son . i also put him on my horse with me .	アニメは息子と一緒に見ます。息子と一緒に乗馬もします。	y
person 2	horses are beautiful , but i prefer watersports . any kind of water really .	馬っていいですよね。でも私はウォータースポーツの方が好きです。水に関するものなら本当、何でも。	y
person 1	i love the beach and collecting seashells . so relaxing .	私はビーチで貝殻を集めるのが大好きです。すごくのんびりできます。	y
person 2	have you ever relaxed on the beach and had someone read to you ? i love that .	ビーチでのんびりしながら本を読んでもらったことがありますか？大好きなんです。	y
person 1	never had that but it sure sounds nice . i sometimes hold yoga on the beach .	いいえ、それはないですけど良さそうですね。時々ビーチでヨガをします。	y
person 2	that is cool ! i started doing yoga after i moved out when i was a teenager .	いいですね！ティ―ンエイジャーの頃、引っ越ししてからヨガを始めました。	y
person 1	i teach it and my morning classes i love to have on the beach .	私はヨガを教えているんですけど、朝のレッスンをビーチでするのが大好きです。	y
person 2	i wish my mom would do that with me . she is too busy .	母と一緒にやりたいんですけど、母はとても忙しくて。	y
