# Supplementary material
Source: ML conference proceedings conference paper supplement (https://aclanthology.org/2022.eval4nlp-1.9)
Supplement: SupplementaryMaterial [file 1378.xlsx]

## Sheet: Sheet1
person	source	translation	evaluation: is this a good translation?
person 1	hey how are you ?	元気か ？	n
person 2	my beta fish and i are good ! trying to come up with another poem . you ?	私の魚と私は元気よ別の詩にしようとしてるのよ	n
person 1	i am fine . . . i am about to leave for cheer practice soon though p	大丈夫だよでもすぐに帰るよ練習の準備をしたい	n
person 2	are you in high school college ? what kind of team are you cheering for ?	高校の時はどんなチームを集めてるの ？	n
person 1	i am in college . . . i am only 21 . i cheer for my schools football team ! ! !	大学で 2 1 歳なんだよフットボールチームのために楽しんでるんだ ！	n
person 2	are they any good ? do you have other hobbies ?	他にいいおっぱいある ？	n
person 1	i would like to think so , but in reality not really . i love the outdoors as well	そう思わせたいけど現実じゃなくてドアが好きなんだ	n
person 2	i enjoy golfing with my friends , and i am a bid deal at the gun club	友達と一緒にゴルフするのが好きなんだそれにクラブの銃の取引をしてる	n
person 1	oh , that sounds fun d guns have always interested me	楽しそうだないつも僕に興味がある	n
person 2	a cheerleader should know how to defend herself ! do you like charity work ?	チアリーダーは自分を守る方法を知っておくべきだ慈善事業が好きなのか ？	y
person 1	i do ! i try to help out when i can , but i am usually too busy	できる限り手を貸そうとしたけどいつも忙しくて	n
person 2	i have a soft spot for the homeless and try to donate clothes and stuff to them	ホームレスの服と服を提供しようとしてたの	n
