# Supplementary material
Source: ML conference proceedings conference paper supplement (https://aclanthology.org/2022.eval4nlp-1.9)
Supplement: SupplementaryMaterial [file 1378.xlsx]

## Sheet: Sheet1
person	source	translation	evaluation: is this a good translation?
person 1	hey how are you ?	こんにちは。調子はどうですか？	y
person 2	my beta fish and i are good ! trying to come up with another poem . you ?	闘魚と私は元気です。また別の詩を作ってたところです。あなたは？	y
person 1	i am fine . . . i am about to leave for cheer practice soon though p	元気です・・・もうすぐチアの練習に行くんですけど（テヘペロ）。	y
person 2	are you in high school college ? what kind of team are you cheering for ?	高校ですか、大学ですか？どんなチームを応援してるんですか？	y
person 1	i am in college . . . i am only 21 . i cheer for my schools football team ! ! !	大学です・・・まだ21歳です。大学のフットボールチームを応援しています。	y
person 2	are they any good ? do you have other hobbies ?	わりと強いんですか？他に趣味はありますか？	y
person 1	i would like to think so , but in reality not really . i love the outdoors as well	そう思いたいんですけど、実は違います。屋外も好きです。	n
person 2	i enjoy golfing with my friends , and i am a bid deal at the gun club	私は友達とゴルフをするのが好きで、ガンクラブでは責任ある仕事を任されています。	y
person 1	oh , that sounds fun d guns have always interested me	へえ、おもしろそうですね。それに銃にはずっと興味がありました。	y
person 2	a cheerleader should know how to defend herself ! do you like charity work ?	チアリーダーは我が身を守る方法を知っておいた方がいいですね！チャリティー活動は好きですか？	y
person 1	i do ! i try to help out when i can , but i am usually too busy	はい！出来る限り手助けしようとしていますが、いつも忙しくって。	y
person 2	i have a soft spot for the homeless and try to donate clothes and stuff to them	私はホームレスが気がかりで服や物を寄付するようにしています。	y
