# Supplementary material
Source: ML conference proceedings conference paper supplement (https://aclanthology.org/2022.eval4nlp-1.9)
Supplement: SupplementaryMaterial [file 1384.xlsx]

## Sheet: Sheet1
person	source	translation	evaluation: is this a good translation?
person 1	hey whats going on today ?	今日はどうなってる ？	n
person 2	hello , i am waiting for my mom to come and get me . how are you ?	ママが迎えに来るのを待ってるんだ	n
person 1	me too she said she would bring home some ham and cheeses	ハムとチーズを持って帰ってくるって言ってた	n
person 2	are you stuck at school too ?	学校にもいないの ？	n
person 1	no i am home i am 10	私は 1 0 歳なの	n
person 2	i am only five years older than you , do you play soccer ? i do .	私は 5 歳なのサッカーをしてるの ？	n
person 1	i played with my best friend his name is jorge	私は彼の親友と遊びました彼の一番の友達と遊んでいました。	n
person 2	that is cute ! what do you want to be when you get older ?	それはかわいいですね、あなたは年を取ったら何をしたいですか ？	n
person 1	i want to be a fireman or orthopedic surgeon	俺は消防士になりたいんだ	n
person 2	very nice ! i am going to be a farm vet . i love all animals , dogs rule though .	俺は農場に行く動物やルールが好きなんだ	n
person 1	i have a dog . a bichon frise	犬を飼ってるんだ	n
person 2	that is a nice dog . i have a springer spaniel .	いい犬だ小さな犬がいるんだ	n
person 1	aw cute . so what do you do for fun . any hobbies ?	楽しいじゃないか何してるんだ ？	n
person 2	i play sports , almost all of them . what about you ?	スポーツをやってるんだ君は ？	n
person 1	i have played football , soccer , baseball , and tennis . do not play too much anymore though	フットボールの試合をしたりテニスをしたりテニスをしたりテニスをやったりしない	n
person 2	why not ? you should be more active .	もっと動きがあるはずだ	n
