# Supplementary material
Source: ML conference proceedings conference paper supplement (https://aclanthology.org/2022.eval4nlp-1.9)
Supplement: SupplementaryMaterial [file 1384.xlsx]

## Sheet: Sheet1
person	source	translation	evaluation: is this a good translation?
person 1	hey whats going on today ?	こんにちは。何してるの？	y
person 2	hello , i am waiting for my mom to come and get me . how are you ?	こんにちは。母が迎えに来てくれるのを待っているところ。調子はどう？	y
person 1	me too she said she would bring home some ham and cheeses	ぼくも。ママはハムとチーズを持って帰るって言ってた。	y
person 2	are you stuck at school too ?	あなたも学校に足止めなの？	y
person 1	no i am home i am 10	ううん、家だよ。ぼくは10歳。	y
person 2	i am only five years older than you , do you play soccer ? i do .	私はたった5歳上。サッカーはする？私はするよ。	y
person 1	i played with my best friend his name is jorge	親友とするよ。名前はジョージ。	y
person 2	that is cute ! what do you want to be when you get older ?	かわいい！大きくなったら何になりたいの？	y
person 1	i want to be a fireman or orthopedic surgeon	消防士か整形外科医になりたい。	y
person 2	very nice ! i am going to be a farm vet . i love all animals , dogs rule though .	すごくいいね！私は農場の獣医になるんだ。どんな動物も好き。犬は最高だけどね。	y
person 1	i have a dog . a bichon frise	犬、飼ってるよ。ビションフリーゼ。	y
person 2	that is a nice dog . i have a springer spaniel .	いい犬だね。うちはスプリンガースパ二エルを飼ってる。	y
person 1	aw cute . so what do you do for fun . any hobbies ?	えーかわいい。何をするのが好き？趣味は？	y
person 2	i play sports , almost all of them . what about you ?	スポーツ。ほとんど全部のスポーツ。あなたは？	y
person 1	i have played football , soccer , baseball , and tennis . do not play too much anymore though	フットボール、サッカー、野球、テニスをしたことがある。でももうそんなにしなくなった。	y
person 2	why not ? you should be more active .	どうして？もっと運動した方がいいよ。	y
