# Supplementary material
Source: ML conference proceedings conference paper supplement (https://aclanthology.org/2022.eval4nlp-1.9)
Supplement: SupplementaryMaterial [file 1391.xlsx]

## Sheet: Sheet1
person	source	translation	evaluation: is this a good translation?
person 1	hi how was your day ? i just got home from volunteering .	今日はどうだった ？	n
person 2	it was good . i worked on the family farm all day .	一日中農場で働いてた	n
person 1	that sounds more fun than my factory job !	（ 吉森 ） 俺の工場より楽しそうだな	n
person 2	sometimes , haha . what do you like to do that is fun ?	（ 吉森 ） たまには何が楽しいんだよ ？	n
person 1	i enjoy joking around with friends and telling jokes , you ?	（ 吉森 ） 俺は冗談を言って冗談言って楽しいんだよな ？	n
person 2	i like to go to tailgate parties with friends . but not my ex best friend	友達とパーティーに行きたいけど親友じゃないわ	n
person 1	that sounds like fun ! i would love to change the world through volunteering .	楽しそうね世界中を変えたいわ	n
person 2	awesome ! i would like to volunteer , but i have to help on the farm a lot .	よかった私は志願したいんだけど農場で多くの人を助けないと	n
person 1	well that is still nice to help out the family .	家族を助けてくれてよかった	n
person 2	yeah , and i do enjoy using the farm land for duck hunting . do you travel ?	狩りのために農場を使って楽しんでるんだ	n
person 1	i do sometimes , i recently visited myrle beach .	最近モンスビーチに来たことがある	n
person 2	oh nice . i have never been on an airplane ! can you believe it ?	飛行機に乗ったことはない信じられるか ？	n
