# Supplementary material
Source: ML conference proceedings conference paper supplement (https://aclanthology.org/2022.eval4nlp-1.9)
Supplement: SupplementaryMaterial [file 1391.xlsx]

## Sheet: Sheet1
person	source	translation	evaluation: is this a good translation?
person 1	hi how was your day ? i just got home from volunteering .	こんにちは。今日はどんな1日だった？僕はボランティア活動から帰ってきたところなんだ。	y
person 2	it was good . i worked on the family farm all day .	いい日だったよ。1日中うちの農場で仕事してた。	y
person 1	that sounds more fun than my factory job !	僕の工場仕事より楽しそう！	y
person 2	sometimes , haha . what do you like to do that is fun ?	たまには楽しいかな。ははは。何が好き？	y
person 1	i enjoy joking around with friends and telling jokes , you ?	友達とふざけたり、冗談言ったりするのが好きだな。きみは？	y
person 2	i like to go to tailgate parties with friends . but not my ex best friend	友達とテールゲート・パーティに行くのが好きかな。元親友以外とだけどね。	y
person 1	that sounds like fun ! i would love to change the world through volunteering .	楽しそう！僕はボランティアで世界を変えたいんだ。	y
person 2	awesome ! i would like to volunteer , but i have to help on the farm a lot .	すごいな！ボランティアしたいけど、農場の手伝いをしないといけないからな。	y
person 1	well that is still nice to help out the family .	うーん、家族の手伝いをするのはいいことだよね。	y
person 2	yeah , and i do enjoy using the farm land for duck hunting . do you travel ?	うん。農場でのカモ狩りは楽しいよ。旅行はする？	y
person 1	i do sometimes , i recently visited myrle beach .	時々ね。最近、マートルビーチに行ったよ。	y
person 2	oh nice . i have never been on an airplane ! can you believe it ?	へえ、いいね。僕は飛行機には乗ったことがないんだ。信じられる？	y
