# Supplementary material
Source: ML conference proceedings conference paper supplement (https://aclanthology.org/2022.eval4nlp-1.9)
Supplement: SupplementaryMaterial [file 1395.xlsx]

## Sheet: Sheet1
person	source	translation	evaluation: is this a good translation?
person 1	hello , do you have any pets ?	こんにちは。何かペットは飼ってる？	y
person 2	hi there ! nice to meet you . yes , i have four dogs .	こんにちは！はじめまして。うん、犬を4匹飼ってる。	y
person 1	nice , i am more of a cat person though . i have 23 of them	いいね。私は猫派なんだけどね。猫は23匹いる。	y
person 2	do you have any brothers or sisters ? i have dogs because i have no siblings .	兄弟はいる？私には兄弟がいないから犬を飼ってるの。	y
person 1	yes but i do not see them often , i travel around the world on my boat	うん、いるけど滅多に会わないよ。私は自分の船で世界中を旅してるんだ。	y
person 2	i love to travel ! i have been to europe and mexico . where do you travel ?	旅行、大好き！ヨーロッパとメキシコに行ったことがある。どこを旅するの？	y
person 1	i travel around the world to try out all kinds of vegan food	世界中を旅してあらゆるヴィーガン料理を試してるんだ。	y
person 2	when i am in mexico , i love hot chilis and spicy food ! do you ?	メキシコに行った時、唐辛子や辛い料理が美味しかったな。辛いのは好き？	y
person 1	yes i enjoy a lot of types of food , just not fish	うん、色んな料理が好きだけど、魚だけは無理。	y
person 2	when you sail on your boat , do you like to swim ? i do !	船で旅をしてる時に泳いだりするの好き？私は好き。	y
person 1	no i do not like to swim , do you play any sports ?	いや、泳ぐのは好きじゃない。スポーツは何かする？	y
person 2	no , what do you enjoy playing ?	しない。どんなスポーツが好き？	y
person 1	i enjoy playing soccer , it reminds me of my cats with yarn	サッカー。サッカーってさ、うちの猫たちが毛糸で遊んでるとこを思い出すんだよね。	y
person 2	lol ! yes , i can see it !	笑！うん、分かる！	y
person 1	what do you do with your dogs ?	犬とは何して遊ぶの？	y
person 2	i love to go for long walks with them . they sure shed a lot !	遠くまで散歩に行くのが大好き。毛がすごくたくさん抜けるんだよ！	y
