# Supplementary material
Source: ML conference proceedings conference paper supplement (https://aclanthology.org/2022.eval4nlp-1.9)
Supplement: SupplementaryMaterial [file 1395.xlsx]

## Sheet: Sheet1
person	source	translation	evaluation: is this a good translation?
person 1	hello , do you have any pets ?	やあペットはいるか ？	y
person 2	hi there ! nice to meet you . yes , i have four dogs .	やあ犬が ４ 匹いるんだ	n
person 1	nice , i am more of a cat person though . i have 23 of them	俺は猫か姉妹はいるか ？	n
person 2	do you have any brothers or sisters ? i have dogs because i have no siblings .	兄弟も姉妹もいないから犬もいないからね	n
person 1	yes but i do not see them often , i travel around the world on my boat	でも見たことがないの私の船の周りを旅してるの	n
person 2	i love to travel ! i have been to europe and mexico . where do you travel ?	旅行が好きなんだメキシコとメキシコはどこへ ？	n
person 1	i travel around the world to try out all kinds of vegan food	私は世界中を旅してきた何種類もの食品を試してみるために	n
person 2	when i am in mexico , i love hot chilis and spicy food ! do you ?	メキシコにいるときは、私は温泉や食べ物が大好きなのよ ！	n
person 1	yes i enjoy a lot of types of food , just not fish	ああ、たくさんの食べ物を楽しんでいるだけだ魚じゃない	n
person 2	when you sail on your boat , do you like to swim ? i do !	船に乗ったら泳ぐのが好きなの ？	n
person 1	no i do not like to swim , do you play any sports ?	泳げないスポーツは好きじゃないのか ？	n
person 2	no , what do you enjoy playing ?	いや何を楽しんでるんだ ？	y
person 1	i enjoy playing soccer , it reminds me of my cats with yarn	私はサッカーを楽しんで、それは私の猫と一緒に遊んでいることを思い出します。	n
person 2	lol ! yes , i can see it !	はい、私はそれを参照してください ！	n
person 1	what do you do with your dogs ?	犬はどうするんだ ？	y
person 2	i love to go for long walks with them . they sure shed a lot !	長い散歩が好きなんだ全部洗い流したんだ	n
