# Supplementary material
Source: ML conference proceedings conference paper supplement (https://aclanthology.org/2022.eval4nlp-1.9)
Supplement: SupplementaryMaterial [file 1397.xlsx]

## Sheet: Sheet1
person	source	translation	evaluation: is this a good translation?
person 1	hello how are you today	こんにちは	n
person 2	hello i am doing well , how are you ?	元気か ？	n
person 1	that is good ! i am doing great thanks .	元気よありがとうございます	n
person 2	what are you up to today	今日は何をするつもりだ ？	y
person 1	gonna read enders game for the fifth time i love this book	この本は ５ 回目の試合を読むだろう	n
person 2	wow , five times ! i have not read that . i am in med school	５ 回も読んでないわ学校に入ってるのよ	n
person 1	med school wow congrats . do you like sci fi	すごい学校だったわね	n
person 2	thank you , both my parents are doctors . yes i do	二人ともありがとう両親は医者なんだ	n
person 1	you should check out this book you might like it too	この本も見た方がいいかも	n
person 2	ok i will when i have time , i am studying a lot plus in the theatre	時間があれば勉強もたくさん勉強します	n
person 1	i understand school can be very time consuming . i joined the air force after graduation	卒業してから学校はとても時間がかかるでしょう	n
person 2	oh wow , good for you ! that is admirable	（ 吉森 ） おおよかったよかったそれはよかった	n
person 1	yeah i got discharged after i got back from the war	戦争から戻った後に釈放された	n
person 2	which one , the war going on right now ?	どっちが戦争が始まった ？	n
