# Supplementary material
Source: ML conference proceedings conference paper supplement (https://aclanthology.org/2022.eval4nlp-1.9)
Supplement: SupplementaryMaterial [file 1397.xlsx]

## Sheet: Sheet1
person	source	translation	evaluation: is this a good translation?
person 1	hello how are you today	こんにちは。調子はどう？	y
person 2	hello i am doing well , how are you ?	こんにちは。元気。あなたは？	y
person 1	that is good ! i am doing great thanks .	それは良かった。ありがとう、私も元気だよ。	y
person 2	what are you up to today	今日はこれから何するの？	y
person 1	gonna read enders game for the fifth time i love this book	5回目のエンダーのゲームを読むんだ。この本、大好きで。	y
person 2	wow , five times ! i have not read that . i am in med school	うわ～、5回目！その本は読んだことないな。私は医大生。	y
person 1	med school wow congrats . do you like sci fi	医大、うわ～、おめでとう。SFは好き？	y
person 2	thank you , both my parents are doctors . yes i do	ありがとう。両親が二人とも医者で。うん、SFは好き。	y
person 1	you should check out this book you might like it too	この本、読んでみて。好きになるかもよ。	y
person 2	ok i will when i have time , i am studying a lot plus in the theatre	分かった、時間がある時に読んでみる。勉強がたくさんある上に演劇もしてるんだ。	y
person 1	i understand school can be very time consuming . i joined the air force after graduation	学校ってかなり時間を取られたりするよね。卒業後、空軍に入隊したんだ。	y
person 2	oh wow , good for you ! that is admirable	うわ～、すごい！立派だよ。	y
person 1	yeah i got discharged after i got back from the war	うん、戦争から帰ってきて除隊した。	y
person 2	which one , the war going on right now ?	どの戦争？今やってる戦争？	y
