# Supplementary material
Source: ML conference proceedings conference paper supplement (https://aclanthology.org/2022.eval4nlp-1.9)
Supplement: SupplementaryMaterial [file 1398.xlsx]

## Sheet: Sheet1
person	source	translation	evaluation: is this a good translation?
person 1	i am just chatting a bit for i go fishing . how are you ?	釣りに行くからチャットできるの、ちょっとだけなんだ。調子はどう？	y
person 2	i am good , just studying up a bit	元気。私はちょっとだけ猛勉強してた。	n
person 1	i never study , no need in my job at the deli counter .	勉強は全然しないな。デリカウンターの仕事には必要ないし。	y
person 2	oh ok i have a literature exam	へえ、そうなんだ。私は文学の試験があるんだ。	y
person 1	that is cool , but i prefer to study the guitar . i am just learning .	かっこいいね。でも僕はギターを習う方がいいかな。今、習ってるんだ。	y
person 2	practice makes perfect . i am into art and drawing	継続は力なりだよね。私は美術と絵画にハマってる。	y
person 1	what kind of art do you like ?	どんな美術が好きなの？	y
person 2	i like new age art	ニューエイジアートが好き。	y
person 1	my favorite artist is actually a musician jim hendrix . do you like him ?	僕の好きなア―ティストは実はミュージシャンのジミ・ヘンドリックスなんだ。彼のこと好き？	y
person 2	oh i love him alot	あー、大好き！	y
person 1	yeah he is super cool .	うん、ものすごくかっこいいよね。	y
person 2	he is a legend in this lifetime	今の時代のレジェンドだね。	y
