# Supplementary material
Source: ML conference proceedings conference paper supplement (https://aclanthology.org/2022.eval4nlp-1.9)
Supplement: SupplementaryMaterial [file 1398.xlsx]

## Sheet: Sheet1
person	source	translation	evaluation: is this a good translation?
person 1	i am just chatting a bit for i go fishing . how are you ?	釣りに行くだけだよ元気か ？	n
person 2	i am good , just studying up a bit	勉強してるだけだよ	n
person 1	i never study , no need in my job at the deli counter .	勉強したこともないデリーでの仕事は必要ない	n
person 2	oh ok i have a literature exam	試験試験もある	n
person 1	that is cool , but i prefer to study the guitar . i am just learning .	それはクールだがギターを勉強したいんだ勉強したいんだ	n
person 2	practice makes perfect . i am into art and drawing	完璧に練習して芸術を描いてるんだ	n
person 1	what kind of art do you like ?	どんな芸術が好きなの ？	n
person 2	i like new age art	新しい芸術が好き	y
person 1	my favorite artist is actually a musician jim hendrix . do you like him ?	お気に入りの芸術家はジム・ハンクス彼が好きなの ？	n
person 2	oh i love him alot	♪ O h, I love him s o much ♪	n
person 1	yeah he is super cool .	ええ、彼は非常にクールです。	n
person 2	he is a legend in this lifetime	彼は生涯で伝説です。	n
