# Supplementary material
Source: ML conference proceedings conference paper supplement (https://aclanthology.org/2022.eval4nlp-1.9)
Supplement: SupplementaryMaterial [file 1399.xlsx]

## Sheet: Sheet1
person	source	translation	evaluation: is this a good translation?
person 1	hello . do you like to read ?	こんにちは。読書は好きですか？	y
person 2	yes i do i am and author for a living	はい。私は作家なんです。	y
person 1	that is awesome . i would like to be a librarian and love books .	すごいですね。私は本が大好きで司書になりたいんです。	y
person 2	is that what you do for a living ?	それがご職業ですか？	y
person 1	no but i would like to .	いいえ、そうなるといいんですけどね。	y
person 2	i also like watching mystery movies	ミステリー映画を見るのも好きです。	y
person 1	those are great . i watch them at times .	いいですよね。私もたまに見ます。	y
person 2	yes i also like to run what about you ?	ええ。私は走るのも好きです。あなたは？	y
person 1	i do need to get more fit but do not run right now .	もうちょっと体を鍛えないといけないんですけど、今は走ってません。	y
person 2	oh okay i also drink green tea that helps also	へえ、そうなんですね。私は緑茶も飲みます。それも効果がありますよ。	y
person 1	i love that . i drink it myself .	私も大好きです。私自身も緑茶を飲みます。	y
person 2	that is good it is very healthy	いいですね。とても健康的ですよね。	y
