# Supplementary material
Source: ML conference proceedings conference paper supplement (https://aclanthology.org/2022.eval4nlp-1.9)
Supplement: SupplementaryMaterial [file 1399.xlsx]

## Sheet: Sheet1
person	source	translation	evaluation: is this a good translation?
person 1	hello . do you like to read ?	はい読んでいいですか ？	n
person 2	yes i do i am and author for a living	はい生きている作家です	n
person 1	that is awesome . i would like to be a librarian and love books .	素晴らしい私は図書館や読書家になりたいです	n
person 2	is that what you do for a living ?	それがあなたの仕事なの ？	y
person 1	no but i would like to .	いいえでも行きたいわ	n
person 2	i also like watching mystery movies	私も謎の映画が好きなの	n
person 1	those are great . i watch them at times .	いいわね何度も見てるわ	n
person 2	yes i also like to run what about you ?	あなたはどうなの ？	n
person 1	i do need to get more fit but do not run right now .	もっと合う必要があるけど今は逃げないで	n
person 2	oh okay i also drink green tea that helps also	私も緑の紅茶も飲むわ	n
person 1	i love that . i drink it myself .	いいわ自分で飲んだの	n
person 2	that is good it is very healthy	それは非常に健康です	n
