# Supplementary material
Source: ML conference proceedings conference paper supplement (https://aclanthology.org/2022.eval4nlp-1.9)
Supplement: SupplementaryMaterial [file 1408.xlsx]

## Sheet: Sheet1
person	source	translation	evaluation: is this a good translation?
person 1	hi , want to go running with me ?	こんにちは。私と一緒に走りに行く？	y
person 2	haha sure . i typically do zumba but running would be a nice change	ははは、いいよ。いつもはズンバをやってるんだけど、走るのも気分転換になっていいかも。	y
person 1	do you happen to be single ?	独身だったりする？	y
person 2	yes i am . no lover in sight . you ?	うん。恋人はいない。あなたは？	y
person 1	i am , i want to have a boyfriend , but my relationships never end well	私も。彼氏が欲しいんだけど、いつも別れが最悪で。	y
person 2	why do you think that is ?	それはなぜだと思う？	y
person 1	i am really unsure .	私にもよく分かんない。	y
person 2	do you collect anything ? better than boyfriends	何か集めてる？彼氏よりいいよ。	y
person 1	baseballs . i like sports a lot .	野球。スポーツが大好き。	y
person 2	i collect rocks and anime characters	私は石やアニメのキャラクターを集めてる。	y
person 1	do your rocks smell funny ?	集めた石って変な匂いがする？	y
person 2	they smell like beans , which i love the smell of	豆みたいな匂いがするよ。それを嗅ぐのが大好き。	y
person 1	hmm i do not know what that smells like .	ふーん、どんな匂いか想像つかないや。	y
person 2	yummy and delicious . you should smell them	美味しそうな匂い。今度、嗅いでみたらいいよ。	y
