# Supplementary material
Source: ML conference proceedings conference paper supplement (https://aclanthology.org/2022.eval4nlp-1.9)
Supplement: SupplementaryMaterial [file 1408.xlsx]

## Sheet: Sheet1
person	source	translation	evaluation: is this a good translation?
person 1	hi , want to go running with me ?	一緒に行こうか ？	n
person 2	haha sure . i typically do zumba but running would be a nice change	（ 吉森 ） そうだな俺はフワフワやってんだけどいい方向が変わるかもしれんー	n
person 1	do you happen to be single ?	（ 吉森 ） お前一人になっちゃうのかよ ？	n
person 2	yes i am . no lover in sight . you ?	そうだ恋人はいないだろ ？	n
person 1	i am , i want to have a boyfriend , but my relationships never end well	恋人が欲しいけど私の関係は終わってないわ	n
person 2	why do you think that is ?	なぜそう思う ？	y
person 1	i am really unsure .	確信がない	n
person 2	do you collect anything ? better than boyfriends	彼氏よりもいいものを集めてるのか ？	n
person 1	baseballs . i like sports a lot .	たくさんスポーツが好きなんだ	n
person 2	i collect rocks and anime characters	石ころを集めてきたんだ	n
person 1	do your rocks smell funny ?	岩の匂いは面白いか ？	n
person 2	they smell like beans , which i love the smell of	豆の匂いがするのが好きなの	n
person 1	hmm i do not know what that smells like .	どんな匂いかわからない	y
person 2	yummy and delicious . you should smell them	おいしそうな匂いがする方がいい	n
