# Supplementary material
Source: ML conference proceedings conference paper supplement (https://aclanthology.org/2022.eval4nlp-1.9)
Supplement: SupplementaryMaterial [file 1409.xlsx]

## Sheet: Sheet1
person	source	translation	evaluation: is this a good translation?
person 1	i am so so tired today	今日は疲れてるんだ	y
person 2	aw man , that stinks . why ?	臭いがするなぜだ ？	y
person 1	my kids are acting so crazy	子供は頭がおかしくなってるんだ	n
person 2	kids are the worst sometimes ! just kidding . i would not know because i have dogs !	子供って最悪の時なんだ犬がいるから知らないんだ ！	n
person 1	i have a lot of them haha	（ 吉森 ） 俺はあいつらにはいっぱいいるんだよ	n
person 2	why ? haha . how many do you have ?	何人いるんだ ？	y
person 1	5 . is that too much ?	５ 人だ多すぎるか ？	y
person 2	uh yeah . i live with two roommates and that is plenty !	ああルームメイトと ２ 人暮らしてるそれで十分だ ！	n
person 1	lol , it is a pain	痛いよ	n
person 2	i bet ! i like cooking but cooking for all of them would be exhausting i bet !	料理が好きなんだけどみんなのために作ってくれない ？	n
person 1	you could cook for me while i practice violin	バイオリンを練習してる間に料理してくれない ？	n
person 2	sure but not your kids lol	でも子供たちは確かじゃない	n
person 1	i only want food for me	私のために食物を食べたいだけです	n
person 2	sounds good . do you have a job ? hopefully you are not a clown . i hate them	いい仕事だと思うけどピエロじゃないといいけど	n
person 1	i am not a clown , nursing is what i do	私は道化じゃないわ介護者じゃないの	n
person 2	cool ! do you live in a house ?	家に住んでるのか ？	n
