# Supplementary material
Source: ML conference proceedings conference paper supplement (https://aclanthology.org/2022.eval4nlp-1.9)
Supplement: SupplementaryMaterial [file 1409.xlsx]

## Sheet: Sheet1
person	source	translation	evaluation: is this a good translation?
person 1	i am so so tired today	今日はめちゃくちゃ疲れた。	y
person 2	aw man , that stinks . why ?	えー、それは最悪だね。どうしたの？	y
person 1	my kids are acting so crazy	子供達がハチャメチャで。	y
person 2	kids are the worst sometimes ! just kidding . i would not know because i have dogs !	子供って時々、最悪だよね！うそうそ、冗談。本当はよく分からない、犬しか飼ったことないから！	y
person 1	i have a lot of them haha	うちには子供、たくさんいるよ、ははは。	y
person 2	why ? haha . how many do you have ?	ええ？ははは。何人いるの？	y
person 1	5 . is that too much ?	5人。多すぎ？	y
person 2	uh yeah . i live with two roommates and that is plenty !	えーっと、うん。私はルームメイト2人と住んでいて、それでもういっぱいいっぱいだよ。	y
person 1	lol , it is a pain	笑。それは大変。	y
person 2	i bet ! i like cooking but cooking for all of them would be exhausting i bet !	その通り！料理が好きなんだけど、皆の分を作ったらもうヘトヘトだよ、本当に！	y
person 1	you could cook for me while i practice violin	私がバイオリンの練習している間に、私の分も作ってよ。	y
person 2	sure but not your kids lol	いいよ、でも子供達の分はなしね（笑）。	y
person 1	i only want food for me	私の分だけでいいよ。	y
person 2	sounds good . do you have a job ? hopefully you are not a clown . i hate them	いいね。仕事はしてる？ピエロじゃなきゃいいけど。ピエロが大嫌いなんだ。	y
person 1	i am not a clown , nursing is what i do	ピエロじゃないよ。看護師の仕事をしてる。	y
person 2	cool ! do you live in a house ?	かっこいい！一軒家に住んでるの？	y
