# Supplementary material
Source: ML conference proceedings conference paper supplement (https://aclanthology.org/2022.eval4nlp-1.9)
Supplement: SupplementaryMaterial [file 1410.xlsx]

## Sheet: Sheet1
person	source	translation	evaluation: is this a good translation?
person 1	hey how is it going ?	こんにちは。調子はどう？	y
person 2	going alright . how are you ?	元気。あなたは？	y
person 1	i am good , watching stuff on youtube , for video games	私も元気。ユーチューブでゲーム動画を見てた。	y
person 2	nice , i love watching movies . seen anything good lately ?	いいね。私は映画を見るのが好き。最近何かいい映画、見た？	y
person 1	i just watched the trolls movie lol	映画トロールズを見たばかりだよ（笑）。	y
person 2	was it any good ? my husband wo not watch it .	おもしろかった？うちの主人は見ないな。	n
person 1	yeah it was really nice , a little cheesy and romantic	うん、すごく良かったよ。定番のロマンチックな映画だけどね。	y
person 2	i like cheesy and romantic . what else do you like to do ?	定番のロマンチックな映画は好きだな。他に趣味はある？	y
person 1	i love my hair , its really long	自分の髪の毛が好き。すごく長いの。	y
person 2	mine is too . i hate it though . just do not have time to get it cut .	私のも長いよ。長いのイヤなんだけど、髪切りに行く時間がなくて。	y
person 1	i hate that it gets in the way when i cook	料理してる時に髪の毛が邪魔になるのが大嫌い。	y
person 2	i cook too ! i am a personal chef . what about you ?	私も料理するよ！パーソナルシェフをしてるんだ。あなたは？	y
person 1	well , i hate having to cook , i burn everything	えーっと、料理しなきゃいけないのが嫌。全部焦がしちゃう。	y
person 2	ah , i cannot do that in my line of work . otherwise , i would have no work !	あー、それは私の仕事上できないな。もししたらクビになる！	y
