# Supplementary material
Source: ML conference proceedings conference paper supplement (https://aclanthology.org/2022.eval4nlp-1.9)
Supplement: SupplementaryMaterial [file 1410.xlsx]

## Sheet: Sheet1
person	source	translation	evaluation: is this a good translation?
person 1	hey how is it going ?	調子はどう ？	n
person 2	going alright . how are you ?	大丈夫だ元気か ？	y
person 1	i am good , watching stuff on youtube , for video games	大丈夫だビデオゲームのために録画してくれ	n
person 2	nice , i love watching movies . seen anything good lately ?	いい映画を見てるの最近何かいいものは ？	n
person 1	i just watched the trolls movie lol	私はただ映画を見ていただけです	n
person 2	was it any good ? my husband wo not watch it .	私の夫はそれを見ていなかった	n
person 1	yeah it was really nice , a little cheesy and romantic	ええとっても楽しかったわ	n
person 2	i like cheesy and romantic . what else do you like to do ?	チーズとロマンチックが好き他にどうしますか ？	n
person 1	i love my hair , its really long	髪が大好きなの	n
person 2	mine is too . i hate it though . just do not have time to get it cut .	私も嫌いだけど時間がないの	n
person 1	i hate that it gets in the way when i cook	料理ができない時は嫌いなの	n
person 2	i cook too ! i am a personal chef . what about you ?	俺も料理だ俺は個人的なシェフだお前は ？	n
person 1	well , i hate having to cook , i burn everything	料理は嫌いだ全部燃やしてやる	n
person 2	ah , i cannot do that in my line of work . otherwise , i would have no work !	僕の仕事には無理だよそれ以外はうまくいかない ！	y
