# Supplementary material
Source: ML conference proceedings conference paper supplement (https://aclanthology.org/2022.eval4nlp-1.9)
Supplement: SupplementaryMaterial [file 1411.xlsx]

## Sheet: Sheet1
person	source	translation	evaluation: is this a good translation?
person 1	hey . how are you doing today ?	こんにちは。調子はどう？	y
person 2	ok . just talked to my brother . we are close .	元気。兄と話していたところ。仲がいいんだ。	y
person 1	that is really sweet . what do you do for fun ?	それはすごくいいね。趣味は何？	y
person 2	i check out new vendors who sell meals from trucks .	食べ物を売ってる新しいフードトラックをチェックすること。	y
person 1	oh that is interesting . i play games , pro and for fun	へえ、おもしろそう。僕は仕事でも遊びでもゲームをするんだ。	y
person 2	cool . i have the confidence to play , but i am introverted .	かっこいい。ゲームには自信があるんだけど、私、内向的なんだよね。	y
person 1	it really helped with my introversion . i love league of legends	僕も内向的だったけどゲームですごく変わったよ。リーグ・オブ・レジェンドが大好きなんだ。	y
person 2	i heard of it . i got into games after dad died . brother brought me up .	聞いたことがある。父が亡くなってからゲームに没頭するようになったよ。兄が私を育ててくれたんだ。	y
person 1	i am sorry to hear about your dad . do you have any pets ?	お父さんのことは残念だったね。ペットは飼ってる？	y
person 2	one dog . do you have any ?	犬が1匹いる。あなたは？	y
person 1	i am a huge dog lover ! yes i have one	僕は大型犬が大好き！うん、1匹飼ってるよ。	y
person 2	are you married and working ?	結婚して仕事してるの？	y
person 1	i am actually single . i am ready to date	実は独身。デートする気は満々。	y
person 2	i just dyed my hair blonde ! my brother did not recognize me !	髪を金髪にしたところなんだ。兄は私だって気が付かなかったの！	y
person 1	oh i bet you look gorgeous now ;	へえ、きっと素敵になったんだろうね！（ウインク）	y
person 2	i have confidence , but i am not the most talkative person .	自信はあるんだけど、なんせ口下手だから。	y
