# Supplementary material
Source: ML conference proceedings conference paper supplement (https://aclanthology.org/2022.eval4nlp-1.9)
Supplement: SupplementaryMaterial [file 1411.xlsx]

## Sheet: Sheet1
person	source	translation	evaluation: is this a good translation?
person 1	hey . how are you doing today ?	今日はどうだ ？	n
person 2	ok . just talked to my brother . we are close .	弟と話をしただけだもうすぐだ	n
person 1	that is really sweet . what do you do for fun ?	それはとても素敵ですね何を楽しんでるの ？	n
person 2	i check out new vendors who sell meals from trucks .	新しいテーブルをチェックしてトラックから食べ物を売る人を見てきます	n
person 1	oh that is interesting . i play games , pro and for fun	面白いねゲームとプロの遊びをして楽しい	n
person 2	cool . i have the confidence to play , but i am introverted .	私は自信を持っているが私は裏返っている	n
person 1	it really helped with my introversion . i love league of legends	本当に助けてくれた私は伝説の英雄だ	n
person 2	i heard of it . i got into games after dad died . brother brought me up .	パパが死んでからゲームに出てきて弟を連れてきてくれた	n
person 1	i am sorry to hear about your dad . do you have any pets ?	お父様の話は聞いてませんペットはいますか ？	n
person 2	one dog . do you have any ?	一匹犬です何かありますか ？	n
person 1	i am a huge dog lover ! yes i have one	私は巨大な犬ですはい一匹います	n
person 2	are you married and working ?	結婚して仕事を ？	n
person 1	i am actually single . i am ready to date	実は一人なんだデートの準備ができてるんだ	y
person 2	i just dyed my hair blonde ! my brother did not recognize me !	金髪の髪を切っただけ弟は私を認識してくれなかった	n
person 1	oh i bet you look gorgeous now ;	君は素敵だと思うけど...	y
person 2	i have confidence , but i am not the most talkative person .	私は自信があるけど私は最高の人間じゃないわ	n
