# Supplementary material
Source: ML conference proceedings conference paper supplement (https://aclanthology.org/2022.eval4nlp-1.9)
Supplement: SupplementaryMaterial [file 1412.xlsx]

## Sheet: Sheet1
person	source	translation	evaluation: is this a good translation?
person 1	hi there , how is your night going ?	こんばんは、今夜の調子はいかがですか？	y
person 2	it is going okay . maybe a little lonely .	元気です。ちょっと寂しいかもしれません。	y
person 1	i am sorry . you want to come over and watch pretty woman . best movie of all time	それはお気の毒ですね。うちに来てプリティウーマンを見ますか？史上最高の映画です。	y
person 2	thank you but no . i would rather be on the lake fishing .	ありがとう、でも大丈夫です。湖で釣りをしたいので。	y
person 1	oh that is okay . do you eat the fish ? i am vegan myself	あー、分かりました。そのお魚を食べるんですか？私自身はヴィーガンなんです。	y
person 2	yes i do . i take the boat out and fish for my dinner .	ええ、食べます。船を出して自分の夕食用に魚を釣ります。	y
person 1	do you enjoy to read ? i could read while you fish ?	読書は好きですか？釣りをされてる間、何か読んであげましょうか？	y
person 2	i do read a lot living out here in a cabin alone .	山小屋に1人で住んでいるので、本はたくさん読むんです。	y
person 1	i guess my 2 smart phones would not work very well at the cabin would they	そちらでは私の2台のスマートフォンはあまり機能しないでしょうね。	y
person 2	probably not . all 5 of my grandchildren complain that theirs do not .	おそらくダメでしょうね。5人の孫たち全員がスマートフォンが使えないって文句を言っています。	y
person 1	i have a lot of people at the hospital that their phones do not work .	病院でも携帯が使えない人たちがたくさんいます。	y
person 2	being 70 years old i do not really mind not having a phone .	私は70歳なので携帯がなくても気になりません。	y
person 1	i need 2 being a registered nurse .	私は正看護師なので2台必要なんです。	y
person 2	i understand that . i am just an old man so i like simple things	そうでしょうね。私は年寄りなのでシンプルなものがすきです。	y
person 1	i like it . you be exactly who you are	いいですね。そのまま変わらずにいて下さいね。	y
person 2	thank you i will try .	ありがとうございます。頑張ります。	y
