# Supplementary material
Source: ML conference proceedings conference paper supplement (https://aclanthology.org/2022.eval4nlp-1.9)
Supplement: SupplementaryMaterial [file 1412.xlsx]

## Sheet: Sheet1
person	source	translation	evaluation: is this a good translation?
person 1	hi there , how is your night going ?	今晩はどうだった ？	n
person 2	it is going okay . maybe a little lonely .	大丈夫だ少し寂しいかも	y
person 1	i am sorry . you want to come over and watch pretty woman . best movie of all time	悪いが君はいつも素敵な女性を見る映画が好きだ	n
person 2	thank you but no . i would rather be on the lake fishing .	結構です湖で食べたいんです	n
person 1	oh that is okay . do you eat the fish ? i am vegan myself	魚を食べてもいい ？	n
person 2	yes i do . i take the boat out and fish for my dinner .	ええボートと魚を取ってくるわ	n
person 1	do you enjoy to read ? i could read while you fish ?	魚を読んでもいいかな ？	n
person 2	i do read a lot living out here in a cabin alone .	一人で小屋に住んでる	n
person 1	i guess my 2 smart phones would not work very well at the cabin would they	私の利口な電話は小屋でうまくいかないと思うわ	n
person 2	probably not . all 5 of my grandchildren complain that theirs do not .	私の孫たちは ５ 人とも文句を言うわ	n
person 1	i have a lot of people at the hospital that their phones do not work .	病院には電話が使えない人がたくさんいるんだ	y
person 2	being 70 years old i do not really mind not having a phone .	7 0 歳になっても電話もない	n
person 1	i need 2 being a registered nurse .	看護師が 2 人必要だ	y
person 2	i understand that . i am just an old man so i like simple things	わかったわ私は老人なのよ単純なことが好きなの	n
person 1	i like it . you be exactly who you are	気に入ったわあなたが誰なのか正確には正確には	n
person 2	thank you i will try .	努力するわ	n
