# Supplementary material
Source: ML conference proceedings conference paper supplement (https://aclanthology.org/2022.eval4nlp-1.9)
Supplement: SupplementaryMaterial [file 1417.xlsx]

## Sheet: Sheet1
person	source	translation	evaluation: is this a good translation?
person 1	hello . what are you up to today ?	こんにちは、今日は何してるの？	y
person 2	i have been playing video games and watching football , how about you ?	ビデオゲームとサッカー観戦してたよ。そちらは？	y
person 1	i am just hanging out at home right now .	今はただなんとなく家で過ごしてる。	y
person 2	i am a homebody too . i stay at home all day , never even had a job .	僕も引きこもりだよ。一日中家にいるんだ、仕事すらしたことない。	y
person 1	i have not worked out side the home to much either .	私も家の外で仕事したことってそんなにないわね。	y
person 2	i tried to get a job at apple , as my mom works there but no go .	お母さんが働いてたからアップルに就職しようとしたんだけど、ダメだった。	y
person 1	ok my husband likes to work on computers .	そうなのね、私の夫はパソコンで仕事するのが好きよ。	y
person 2	they are fun . i also wanted to be a rock star as i love the music .	楽しいもんね。僕は音楽が好きだからロックスターにもなりたかったんだ。	y
person 1	i love to listen to music too .	私も音楽聞くの好きよ。	y
person 2	i have problems at concerts as i forget to eat , which is bad for my diabetes .	僕はライブが問題なんだよね、食べるのを忘れちゃうから。糖尿病に悪影響なんだよね。	y
person 1	my mom has problems with blood sugar also .	私の母も血糖値に問題があるのよ。	y
person 2	it is really tough . i miss cakes . i have to go soon , anything else to say ?	本当につらいよ。ケーキが恋しい。もうすぐ行かなくちゃ、他に何かある？	y
person 1	not too much . you have a great day .	そんなにない。じゃあまたね。	y
person 2	you too , thank you for the amazing conversation !	またね、素敵な会話をありがとう！	y
person 1	make sure you take care of yourself .	ちゃんと体に気を付けてね。	y
person 2	i will try . it will depend on if i can resist the cakes !	頑張るよ。ケーキの誘惑に勝てるかどうかによるけどね！	y
