# Supplementary material
Source: ML conference proceedings conference paper supplement (https://aclanthology.org/2022.eval4nlp-1.9)
Supplement: SupplementaryMaterial [file 1417.xlsx]

## Sheet: Sheet1
person	source	translation	evaluation: is this a good translation?
person 1	hello . what are you up to today ?	こんにちは今日は何をしてるの ？	y
person 2	i have been playing video games and watching football , how about you ?	ビデオゲームをしてフットボールを見てたんだ君はどうだ ？	y
person 1	i am just hanging out at home right now .	今家にいるところだ	n
person 2	i am a homebody too . i stay at home all day , never even had a job .	私も家にいる毎日仕事もしてない	n
person 1	i have not worked out side the home to much either .	家にもいなかったし	n
person 2	i tried to get a job at apple , as my mom works there but no go .	リンゴの仕事をしようとしたけどママのようには行かないで	n
person 1	ok my husband likes to work on computers .	夫はコンピューターで仕事が好きなの	n
person 2	they are fun . i also wanted to be a rock star as i love the music .	彼らは楽しいし音楽のスターになりたかった	n
person 1	i love to listen to music too .	私も音楽が好きなの	y
person 2	i have problems at concerts as i forget to eat , which is bad for my diabetes .	私は忘れられない問題を抱えているそれが私の脳味噌に悪い問題なの	n
person 1	my mom has problems with blood sugar also .	ママも砂糖も問題を抱えてる	n
person 2	it is really tough . i miss cakes . i have to go soon , anything else to say ?	本当に残念だケーキを早く行かないと他に何か ？	n
person 1	not too much . you have a great day .	それほどじゃない今日は素晴らしい日だ	n
person 2	you too , thank you for the amazing conversation !	あなたも素敵な会話をありがとうございました ！	n
person 1	make sure you take care of yourself .	自分のことを気にしてください。	n
person 2	i will try . it will depend on if i can resist the cakes !	やってみるわケーキに抵抗しても依存するわ	n
