# Supplementary material
Source: ML conference proceedings conference paper supplement (https://aclanthology.org/2022.eval4nlp-1.9)
Supplement: SupplementaryMaterial [file 1427.xlsx]

## Sheet: Sheet1
person	source	translation	evaluation: is this a good translation?
person 1	hi , do you have any neat hobbies ?	あら素敵なルビーある ？	n
person 2	hi ! definitely shopping ! also the serenity of the forest . . . just being there . . and food !	お買い物もしたわねあそこには食料もあるのよ	n
person 1	cool . . . i like dancing swimming with sharks	いいぞサメと踊るのが好きなんだ	n
person 2	wow , with sharks ! adventurous ! what do you do	サメと踊って冒険をしてどうするの ？	n
person 1	its definitely a thrill . i am an artist and you ?	俺は芸術家か ？	n
person 2	i work from home . . . just do not like people being too close to me	家から働いてるのよ私のような人は近くにいないで	n
person 1	i can definitely understand that		n
person 2	i am kinda shy , and also do not like when people ask me a lot of questions	私は恥ずかしがり屋でも多くの人に質問されるのが好きでもない	n
person 1	i used to be the same way , then i stepped out the box and never looked back	私も同じようにボックスから出て行って二度と戻ってこなかった	y
person 2	i am trying . you seem nice . you can ask me questions . do you have pets ?	質問に答えろペットはいるか ？	n
person 1	nope no pets , do you ?	ペットは要らないんだろ ？	n
person 2	no , but i think it would be nice to have a buddy , and they do not ask questions	いや友達が必要だと思うが質問はしないほうがいいと思う	n
person 1	true lol . where are you from ?	本当だどこから来たんだ ？	n
person 2	i live in upstate new york	新しい州に住んでるの	n
person 1	i am originally from dallas but now i live in los angeles	俺は最初の男だが今はロスに住んでる	n
person 2	why did you move ? how do you like it in la ?	なぜ引っ越したんだ ？	n
