# Supplementary material
Source: ML conference proceedings conference paper supplement (https://aclanthology.org/2022.eval4nlp-1.9)
Supplement: SupplementaryMaterial [file 1427.xlsx]

## Sheet: Sheet1
person	source	translation	evaluation: is this a good translation?
person 1	hi , do you have any neat hobbies ?	こんにちは、あなた何か面白い趣味持ってる？	y
person 2	hi ! definitely shopping ! also the serenity of the forest . . . just being there . . and food !	こんにちは！そりゃもう買い物よ！それと森林の静けさ・・・。ただそこにいるだけでいいの・・。それと、食べ物！	y
person 1	cool . . . i like dancing swimming with sharks	いいね・・・。私は踊るのと、サメと泳ぐのが好き。	y
person 2	wow , with sharks ! adventurous ! what do you do	うわあ、サメと！チャレンジャーね！仕事は何してるの？	y
person 1	its definitely a thrill . i am an artist and you ?	ぞくぞく感がたまらないの。私は芸術家よ、あなたは？	y
person 2	i work from home . . . just do not like people being too close to me	在宅で働いてる…。他人と近づきすぎるのがちょっと好きじゃなくって。	y
person 1	i can definitely understand that		n
person 2	i am kinda shy , and also do not like when people ask me a lot of questions	なんというか恥ずかしがり屋なのよね、あと、人からたくさん質問されるのも好きじゃない。	y
person 1	i used to be the same way , then i stepped out the box and never looked back	私も前はそうだったんだけど、一度自分の殻を破ってからはもうずっと突き進んでるわ。	y
person 2	i am trying . you seem nice . you can ask me questions . do you have pets ?	努力はしてるのよ。あなたいい人みたいね。あなたなら私に質問してもいいわ。何かペット飼ってる？	y
person 1	nope no pets , do you ?	いや、ペットは飼ってない。あなたは？	y
person 2	no , but i think it would be nice to have a buddy , and they do not ask questions	ううん、飼ってない。でも相棒がいるといいなって思ってる。それにペットはいろいろ聞いてこないじゃない。	y
person 1	true lol . where are you from ?	確かに（笑）。どこに住んでるの？	y
person 2	i live in upstate new york	ニューヨーク州北部に住んでる。	y
person 1	i am originally from dallas but now i live in los angeles	私はダラス出身だけど、今はロサンゼルスに住んでるわ。	y
person 2	why did you move ? how do you like it in la ?	どうして引っ越したの？ロスはどう？	y
