# Supplementary material
Source: ML conference proceedings conference paper supplement (https://aclanthology.org/2022.eval4nlp-1.9)
Supplement: SupplementaryMaterial [file 1428.xlsx]

## Sheet: Sheet1
person	source	translation	evaluation: is this a good translation?
person 1	hi , how are you today ?	こんにちは、今日調子はいかが？	y
person 2	i am good thanks for asking , and you ?	順調だよ、ありがとう。そちらは？	y
person 1	good , baking a wedding cake for a friends wedding tomorrow .	いい感じよ。明日の友達の結婚式用にウエディングケーキ焼いてるところ。	y
person 2	sounds fun ! i recently started my sophomore year in high school .	楽しそう！僕は最近高校2年に進学したんだ。	y
person 1	i was in drama club , but now i just go watch instead of act in plays .	私は演劇部だったわ、でも今は演じるんじゃなくて見に行くだけよ。	y
person 2	drama club is cool , i am really into science .	演劇部っていいね、僕は科学にすごくはまってる。	y
person 1	that is cool , you like chemistry ?	すごいじゃない、化学は好き？	y
person 2	i love chemistry ! i am not a fan of biology however .	化学大好きだよ！でも生物学はいまいちだな。	y
person 1	i like being at the park . is that a science ? lol .	私は公園に居るのが好き。これって科学のうちに入るかしら？（笑）。	y
person 2	environmental , or earth science lol . do you have any pets ?	環境科学、もしくは地球科学って感じかな（笑）。何かペット飼ってる？	y
person 1	no , not currently . do you ?	ううん、今は飼ってない。あなたは？	y
person 2	yes , we have 3 dogs , mine is named maddie .	飼ってるよ。犬を3匹。僕のはマディーって名前。	y
person 1	how long have you had maddie ?	マディーはどれくらい飼ってるの？	y
person 2	for 4 years , she loves the sunshine state as much as me !	4年になる。マディーも僕と同じくらいサンシャイン州が大好きなんだ。	y
person 1	the sunshine state , is that florida ?	サンシャイン州って、フロリダのこと？	y
person 2	it sure is ! have you ever been ?	もちろんさ！フロリダに来たことある？	y
person 1	yes , i lived in south florida for years .	うん、何年も南フロリダに住んでたのよ。	y
person 2	very cool ! nice chatting with you !	すごい！話ができてよかったよ！	y
