# Supplementary material
Source: ML conference proceedings conference paper supplement (https://aclanthology.org/2022.eval4nlp-1.9)
Supplement: SupplementaryMaterial [file 1428.xlsx]

## Sheet: Sheet1
person	source	translation	evaluation: is this a good translation?
person 1	hi , how are you today ?	***	n
person 2	i am good thanks for asking , and you ?	私はあなたとあなたのために感謝していますか ？	n
person 1	good , baking a wedding cake for a friends wedding tomorrow .	いいわ明日の結婚式のケーキのために結婚式の友人のために。	n
person 2	sounds fun ! i recently started my sophomore year in high school .	楽しそうだね最近高校で卒業したんだ	n
person 1	i was in drama club , but now i just go watch instead of act in plays .	ドラマクラブに行ってたけど今は遊んでない方がいい	n
person 2	drama club is cool , i am really into science .	ドラマクラブはクールで科学に参加してるんだ	n
person 1	that is cool , you like chemistry ?	化学の方が好きなの ？	n
person 2	i love chemistry ! i am not a fan of biology however .	化学は好きだけど生物学のファンじゃない	y
person 1	i like being at the park . is that a science ? lol .	公園が好きなんだ科学者なの ？	n
person 2	environmental , or earth science lol . do you have any pets ?	環境や科学的にはペットはいる ？	n
person 1	no , not currently . do you ?	今は違うよな ？	n
person 2	yes , we have 3 dogs , mine is named maddie .	はい ３ 匹の犬がいます私の名前はマディソン	n
person 1	how long have you had maddie ?	マディソンは何時から ？	n
person 2	for 4 years , she loves the sunshine state as much as me !	４ 年も太陽の状態が好きなんだ ！	n
person 1	the sunshine state , is that florida ?	フロリダ州の太陽祭 ？	n
person 2	it sure is ! have you ever been ?	本当に会ったことがあるのか ？	n
person 1	yes , i lived in south florida for years .	ええフロリダに住んで何年も	n
person 2	very cool ! nice chatting with you !	素敵な会話ね ！	n
