# Supplementary material
Source: ML conference proceedings conference paper supplement (https://aclanthology.org/2022.eval4nlp-1.9)
Supplement: SupplementaryMaterial [file 1430.xlsx]

## Sheet: Sheet1
person	source	translation	evaluation: is this a good translation?
person 1	hello , what are you up to today ?	今日はどうしたの ？	n
person 2	just hanging out . . working on my own youtube channel .	ちょっと待って自分で直してくれ	n
person 1	cool ! i have been out swimming , and then i had to walk my four dogs .	俺は泳いでたんだ 4 匹の犬を歩かせた	n
person 2	sounds very tiring . i have just been sitting . i am not very active .	指輪の音がするじっと座ってただけだ	n
person 1	what kinds of things do you cover on your youtube channel ?	チューブに何か隠してるのか ？	n
person 2	i like making lets plays . a lot of people do not know what that is .	演奏が好きなんだ多くの人にはわからないんだ	n
person 1	i have never heard of that .	今まで聞いたことがない	y
person 2	my dad works in an advertising company . he set me up to earn money on youtube .	パパが広告会社で働いてるんだ君をチューブに入れた金を稼ぐためにね	n
person 1	i wish i could make money on youtube .	君をチューブに入れたいんだが	n
person 2	most people would . it helps me get the ladies .	女性を助けてくれる人はほとんどいない	n
person 1	is it your main source of income ?	月収源か ？	n
person 2	yea . . . i am still a teenager . hopefully this pays for college . what do you do ?	まだ子供なんだ大学のために払ってくれないか ？	n
person 1	i am a swimming instructor .	俺は教官だぞ	n
person 2	fun . have you ever swam with dolphins ? that is my favorite animal .	楽しいよイルカと一緒に泳いだことあるか ？	n
person 1	yes , i have . i was actually attacked by one . that is how i lost my little toe .	ええ実は一本襲われたの足が折れたの	n
person 2	wow . . that sounds awful . hope you can still walk .	ひどい音だまだ歩けるといいな	n
