# Supplementary material
Source: ML conference proceedings conference paper supplement (https://aclanthology.org/2022.eval4nlp-1.9)
Supplement: SupplementaryMaterial [file 1430.xlsx]

## Sheet: Sheet1
person	source	translation	evaluation: is this a good translation?
person 1	hello , what are you up to today ?	やあ、今日は何してるの？	y
person 2	just hanging out . . working on my own youtube channel .	大したことしてないよ・・。自分のYouTubeチャンネルの作業してる。	y
person 1	cool ! i have been out swimming , and then i had to walk my four dogs .	すごい！僕は泳ぎに行ってきたところ。それに犬4匹散歩に連れてかなくちゃならなかったんだ。	y
person 2	sounds very tiring . i have just been sitting . i am not very active .	そりゃ大変そうだね。僕は座ってるだけだよ。そんなに活動的じゃないんだ。	y
person 1	what kinds of things do you cover on your youtube channel ?	君のYouTubeチャンネルはどんな内容でやってるの？	y
person 2	i like making lets plays . a lot of people do not know what that is .	実況プレイ配信が好きなんだ。実況プレイって何なのか、あまり知られてないけどね。	y
person 1	i have never heard of that .	聞いたことないや。	y
person 2	my dad works in an advertising company . he set me up to earn money on youtube .	お父さんが広告代理店で働いてて、僕がYouTubeでお金を稼げるようにお膳立てしてくれたんだ。	y
person 1	i wish i could make money on youtube .	僕もYouTubeでお金稼げたらなあ。	y
person 2	most people would . it helps me get the ladies .	大抵の人はできるよ。おかげで女性にもてるようになったよ。	y
person 1	is it your main source of income ?	YouTubeが主な収入源？	y
person 2	yea . . . i am still a teenager . hopefully this pays for college . what do you do ?	うん・・・。僕はまだ10代だからさ、大学の資金になればいいなと思ってる。君は何やってるの？	y
person 1	i am a swimming instructor .	僕は水泳コーチ。	y
person 2	fun . have you ever swam with dolphins ? that is my favorite animal .	楽しそう。イルカと泳いだことある？僕の大好きな動物なんだ。	y
person 1	yes , i have . i was actually attacked by one . that is how i lost my little toe .	うん、あるよ。というか実は攻撃されたんだ。それで足の小指がないんだ。	y
person 2	wow . . that sounds awful . hope you can still walk .	ええっ・・。それは酷いね。まだ歩けるといいけど。	y
