# Supplementary material
Source: ML conference proceedings conference paper supplement (https://aclanthology.org/2022.eval4nlp-1.9)
Supplement: SupplementaryMaterial [file 1432.xlsx]

## Sheet: Sheet1
person	source	translation	evaluation: is this a good translation?
person 1	i am happy to be retired from teaching but miss it , how r u ?	引退して嬉しいけどどうしたの ？	n
person 2	good . i work at an office selling real estate . boss is my boyfriend .	俺は不動産屋で働いてるボスは俺の彼氏だ	n
person 1	wow , that is sounds cool , do you both work well together	いい感じだな二人とも上手くやってるな	n
person 2	very well . do you have any hobbies ? i am an amateur singer .	俺は素人の素人だ	n
person 1	cool would love to hear ya sing , i enjoy riding horses	歌が聞きたい馬に乗って	n
person 2	i love horses . i had one growing up . love to garden too .	馬が好きだ庭も大好きだ	n
person 1	really , my fav flower is a rose . i love being in the kitchen baking	私の祖母はバラなのよ台所にいるのが大好き	n
person 2	i love daisies . i am not a great cook , but love to eat .	料理は好きじゃないけど食べるのが好きなの	n
person 1	well come over , i will bake something for ya	さあどうぞ何か作るよ	n
person 2	cheesecake and tiramisu are delicious .	チーズケーキとツマミはおいしかったよ	n
person 1	yes they are and i can make both , baking deserts are fun	私も同じだバンプ王は楽しい	n
person 2	i should learn , but i tend to burn while cooking and baking .	私は学ぶべきだったけど料理とバンプの間に焼き尽くすことにしたの	n
person 1	just pratice something simple like a butter cake and pratice	単純なバターケーキのような単純な何かがバターケーキのように単純なものを作る	n
person 2	ok . it is a nice day here . how about by you ?	いい日だ君はどうだ ？	n
person 1	well its raining quite a bit	雨が降ってきた	n
person 2	are you up north ? i am in the south .	北に向かってるのか ？	n
