# Supplementary material
Source: ML conference proceedings conference paper supplement (https://aclanthology.org/2022.eval4nlp-1.9)
Supplement: SupplementaryMaterial [file 1432.xlsx]

## Sheet: Sheet1
person	source	translation	evaluation: is this a good translation?
person 1	i am happy to be retired from teaching but miss it , how r u ?	私、教職を辞めたのは嬉しいんだけど、恋しくもあるのよね。あなたはどう？	n
person 2	good . i work at an office selling real estate . boss is my boyfriend .	元気よ。不動産販売会社に勤めてる。上司と付き合ってるの。	y
person 1	wow , that is sounds cool , do you both work well together	ええ、それはすごい。二人一緒に仕事してうまくいくの？	y
person 2	very well . do you have any hobbies ? i am an amateur singer .	とってもうまくいってるよ。あなたは何か趣味がある？私はアマチュア歌手なんだ。	y
person 1	cool would love to hear ya sing , i enjoy riding horses	素敵、あなたの歌をぜひ聞きたいな。私は乗馬が好き。	y
person 2	i love horses . i had one growing up . love to garden too .	馬大好き。子供の頃一頭飼ってたよ。庭仕事も大好き。	y
person 1	really , my fav flower is a rose . i love being in the kitchen baking	本当? 私は薔薇が好き。台所に立ってパンやお菓子を作るのも大好きよ。	y
person 2	i love daisies . i am not a great cook , but love to eat .	私はヒナギクが大好き。私は料理は得意じゃないんだけど、食べるのは大好き。	y
person 1	well come over , i will bake something for ya	じゃあ、私のところにおいでよ、何か焼いてあげるよ。	y
person 2	cheesecake and tiramisu are delicious .	チーズケーキとかティラミスっておいしいよね。	y
person 1	yes they are and i can make both , baking deserts are fun	うん、そうね、私どっちも作れるよ、デザートづくりって楽しい。	y
person 2	i should learn , but i tend to burn while cooking and baking .	私も習わなきゃ。でも料理とかお菓子作りとかしてたら大体焦がしちゃうんだよね。	y
person 1	just pratice something simple like a butter cake and pratice	とにかくバターケーキとかシンプルなもので、練習あるのみよ。	y
person 2	ok . it is a nice day here . how about by you ?	そうね。ここはいい天気よ。あなたのところはどう？	y
person 1	well its raining quite a bit	ええっと、かなり雨が降ってる。	y
person 2	are you up north ? i am in the south .	北の方に住んでるの？私は南に住んでる。	y
