# Supplementary material
Source: ML conference proceedings conference paper supplement (https://aclanthology.org/2022.eval4nlp-1.9)
Supplement: SupplementaryMaterial [file 1434.xlsx]

## Sheet: Sheet1
person	source	translation	evaluation: is this a good translation?
person 1	hello , i am outside with my cat , what are you doing	やあ、今、猫と一緒に外にいるんだけど、何してる？	y
person 2	drinking beer ! love tasting beers from various countries !	ビール飲んでる！いろんな国のビールを試してみるのが大好きなんだ！	y
person 1	i do not like beer but i do pasta	僕はビール好きじゃないんだよね、でもパスタは好き。	y
person 2	pasta is good ! working for a big company in marketing i have little time to cook .	パスタいいよね！大きな会社のマーケティング部門で働いてて、料理する時間がほとんどないんだ。	y
person 1	oh , sounds like you work hard , i am retired	うわあ、仕事大変そうだね。僕はもう退職してるよ。	y
person 2	what do you do for fun ? i have many hobbies including working on cars .	君の趣味は？僕は車いじりとかたくさん趣味があるよ。	y
person 1	i swim at the pool , go outside , and play with my cat	プールで泳いだり、野外に出たり、あとは猫と遊んだり。	y
person 2	i play pool , card games and darts . i also like music , do you ?	僕はビリヤードとかカードゲームとかダーツなんかをやるよ。音楽も好き、君は？	y
person 1	i like a lot of music especially britney spears	いろんな音楽が好きだけど、特にブリトニー・スピアーズが好きだな。	y
person 2	really ? my favorite is classic rock ! love listening to that while playing billiards .	本気で？僕は古典ロックが好きだな！ビリヤードしながら聞くのが大好きだよ。	y
person 1	i never played billiards , i am an outside person	ビリヤードはやったことないや。僕アウトドア派なんだよね。	y
person 2	i like both ! i am excited to retire like you , my only freetime is on weekends .	僕はどっちもいける！僕も早く君みたいに充実したリタイア生活送りたいよ。今は週末しか自由になる時間がないんだ。	y
person 1	i was like that until i retired , now i can even sleep late	僕もリタイアするまではそうだったよ。今は朝もゆっくり寝てられるよ。	y
person 2	i am envious , but happy for you !	いいなあ、よかったね！	y
person 1	you will get there and then enjoy it like i do	もう少しの辛抱だよ、君もリタイアしたら目いっぱい楽しみなよ！	y
person 2	i am sure i will !	そりゃもう絶対楽しむよ！	y
