# Supplementary material
Source: ML conference proceedings conference paper supplement (https://aclanthology.org/2022.eval4nlp-1.9)
Supplement: SupplementaryMaterial [file 1434.xlsx]

## Sheet: Sheet1
person	source	translation	evaluation: is this a good translation?
person 1	hello , i am outside with my cat , what are you doing	こんにちは、私は猫と外にいる、こんにちは、あなたは何をしているのですか ？	n
person 2	drinking beer ! love tasting beers from various countries !	ビールを飲んで、多くの国からビールを飲みます ！	n
person 1	i do not like beer but i do pasta	ビールは好きじゃないけどパスタは好きなの	y
person 2	pasta is good ! working for a big company in marketing i have little time to cook .	カスタはいい仕事だ料理の時間が必要なんだ	n
person 1	oh , sounds like you work hard , i am retired	大変な仕事だな引退したんだ	n
person 2	what do you do for fun ? i have many hobbies including working on cars .	楽しい仕事は車にも沢山あるし	n
person 1	i swim at the pool , go outside , and play with my cat	プールで泳いで、外で、外で、猫と遊んで、遊んで、	n
person 2	i play pool , card games and darts . i also like music , do you ?	プールゲームトランプゲームもゲームもゲームも好きだよね ？	n
person 1	i like a lot of music especially britney spears	音楽が好きなんだ特にピアノが好きなんだ	n
person 2	really ? my favorite is classic rock ! love listening to that while playing billiards .	僕の好きなのは古典的なロックだ億万長者が演奏するのを聞いている間に	n
person 1	i never played billiards , i am an outside person	私はバカなフリをしたことがないわ私は外の人よ	n
person 2	i like both ! i am excited to retire like you , my only freetime is on weekends .	私もよあなたみたいに退職して嬉しいわ週末は冷凍庫なの	n
person 1	i was like that until i retired , now i can even sleep late	引退してからみたいだったけどもう寝られないの	n
person 2	i am envious , but happy for you !	私は嫉妬してたわでも幸せにしてあげたいわ	n
person 1	you will get there and then enjoy it like i do	そこに行って楽しんできて	n
person 2	i am sure i will !	きっと行くわ ！	y
