# Supplementary material
Source: ML conference proceedings conference paper supplement (https://aclanthology.org/2022.eval4nlp-1.9)
Supplement: SupplementaryMaterial [file 1444.xlsx]

## Sheet: Sheet1
person	source	translation	evaluation: is this a good translation?
person 1	i love fashion since i was young . that is why i moved to ny .	私、子供の頃からファッション大好きだったのよ。だからニューヨークに引っ越してきたの。	y
person 2	that is really cool . my daughters are into fashion too	すごいなあ。私の娘もおしゃれにはまってるわよ。	y
person 1	how many daughters ? i will be a designer like coco chanel someday .	娘さん何人いるの？私はいつかココ・シャネルみたいなデザイナーになりたいわ。	y
person 2	i have three daughters . they are a handful	娘は3人。結構大変よ。	y
person 1	i can imagine ! when i shop i get so inspired to design new girls styles .	分かるわ！買い物に行ったら、女の子向けの新しいスタイルをデザインしたい、ってすごくモチベーションがわくのよ。	y
person 2	you should . little girls need fabulous clothes	是非デザインしてほしいわ！女子には素敵な洋服が必要よ。	y
person 1	you do , too ! once i finish design school i will make you an outfit .	あなたにだって！デザイン学校を出たらあなたにも服を作ってあげるわよ。	y
person 2	thank you ! that is so sweet . where are you from ?	ありがとう！すごく嬉しい。あなたはどこの出身？	y
person 1	far from here , but i live in ny now because this school is amazing .	すごく遠いところ。でも今はこの学校すごくいいからニューヨークに住んでるの。	y
person 2	i bet ! my mom is from saudi arabia but i live in texas	そうだよね！私のお母さんもサウジアラビア出身だけど私はテキサスに住んでるのよ。	y
person 1	is it hot there ? i imagine it is much hotter than ny .	テキサスって暑い？ニューヨークより大分暑いんじゃないかと思うんだけど。	y
person 2	it is very hot . thankfully i can just put on shorts or a skirt	すごく暑いよ。でも短パンとかスカートとか、さっと履けるから助かってる。	y
person 1	i will make you a skirt , alexander mcqueen style for summer .	そしたらスカートを作ってあげるわよ、夏用のアレクサンダー・マックイーンスタイル。	y
person 2	yes ! ! i would absolutely love that . do you do anything else for fun ?	是非！！めちゃくちゃ嬉しい。他には何か趣味がある？	y
