# Supplementary material
Source: ML conference proceedings conference paper supplement (https://aclanthology.org/2022.eval4nlp-1.9)
Supplement: SupplementaryMaterial [file 1444.xlsx]

## Sheet: Sheet1
person	source	translation	evaluation: is this a good translation?
person 1	i love fashion since i was young . that is why i moved to ny .	若い頃からモニーに引っ越してきたドレスが大好きなんだ	n
person 2	that is really cool . my daughters are into fashion too	かっこいいわね娘もファッションに参加してるし	n
person 1	how many daughters ? i will be a designer like coco chanel someday .	何人の娘がいるんだ ？	n
person 2	i have three daughters . they are a handful	三人の娘がいるの	n
person 1	i can imagine ! when i shop i get so inspired to design new girls styles .	私は想像できます新しい女の子のブロイルズ設計にとても感動しています	n
person 2	you should . little girls need fabulous clothes	女の子には素敵な服が必要だ	n
person 1	you do , too ! once i finish design school i will make you an outfit .	学校を卒業したら着替えてあげるわ	n
person 2	thank you ! that is so sweet . where are you from ?	ありがとう優しいわねどこから来たの ？	n
person 1	far from here , but i live in ny now because this school is amazing .	この学校は最高だからここまで来たのよ	n
person 2	i bet ! my mom is from saudi arabia but i live in texas	ママはソーセージから来たけどメールで生きてるの	n
person 1	is it hot there ? i imagine it is much hotter than ny .	暑いのかな ？	n
person 2	it is very hot . thankfully i can just put on shorts or a skirt	とても熱いしパンツかスカートを履くのもいい	n
person 1	i will make you a skirt , alexander mcqueen style for summer .	私はあなたにスカートを作って夏の女王の衣装を作ってあげるわ	n
person 2	yes ! ! i would absolutely love that . do you do anything else for fun ?	ええもちろんよ他に楽しみたいことは ？	n
