# Supplementary material
Source: ML conference proceedings conference paper supplement (https://aclanthology.org/2022.eval4nlp-1.9)
Supplement: SupplementaryMaterial [file 1446.xlsx]

## Sheet: Sheet1
person	source	translation	evaluation: is this a good translation?
person 1	hi there ! how are you today ? ?	こんにちは！お元気ですか？？	y
person 2	hello , how are you ? i am joe . what do you do ?	やあ、こんにちは！ジョーです。お仕事聞いてもいいですか？	y
person 1	hi , joe ! i am dana . . . i work in a bookstore . what do you do ?	こんにちはジョー！ダナといいます・・・。本屋さんで働いてるんです。あなたは？	y
person 2	i am a librarian for children . i really enjoy it i love books .	僕は子供向けの図書館司書なんです。本が大好きだから仕事もすごく楽しいですよ。	y
person 1	we have that in common then ! books and stories have always been my passion	ということは共通項がありますね！本や物語には昔からずっと情熱を傾けてきたんです。	y
person 2	maybe we could have a future given our shared love of books !	だったらお互いに本好きだし、これから先もよい関係を続けていけるでしょうか？	y
person 1	who knows ? ! never say never !	それもありかも？！諦めたらそこで終わりですから！	y
person 2	forgive me if that was too forward as i recently got divorced .	ちょっと先走り過ぎていたらごめんなさい。つい最近離婚したもので。	y
person 1	no problem , i took no offense ! where do you live ? i live in the city .	大丈夫ですよ、全然気にならないです！どこに住んでるんですか？私は市内に住んでます。	y
person 2	me too . do you have any kids ? i love children but not so much on the caretaking .	僕もです。お子さんはいますか？僕、子供は大好きなんですが実際子育てとなるとちょっと。	y
person 1	i work close to home , within walking distance ! i do not even need to drive .	家と職場がすごく近いんです。歩いていける距離！だから運転もしなくていいんです。	y
person 2	that is awesome public transit is the best .	それはいいですね、公共交通機関が一番ですよ。	y
person 1	no kids yet ! . did not have much family life growing up , was just me and my mom .	子供はまだ考えてないんです！自分が子供の頃もあまり家族生活っていうのは経験ないんですよね。私と母と二人きりでした。	y
person 2	got it . do you have any hobbies ?	そうなんですね。何か趣味は？	y
person 1	well , i am an avid reader ! haha . i really like art too .	えっと、大の読書家です！あはは！それから芸術も大好きですよ。	y
person 2	i adore art . although i can barely see it sometimes with my bifocals .	僕も芸術は大好きです、といっても遠近両用メガネなんで時々全然見えてないんですけど。	y
