# Supplementary material
Source: ML conference proceedings conference paper supplement (https://aclanthology.org/2022.eval4nlp-1.9)
Supplement: SupplementaryMaterial [file 1446.xlsx]

## Sheet: Sheet1
person	source	translation	evaluation: is this a good translation?
person 1	hi there ! how are you today ? ?	こんにちは今日はどうですか ？	y
person 2	hello , how are you ? i am joe . what do you do ?	こんにちはジョーですお元気ですか ？	n
person 1	hi , joe ! i am dana . . . i work in a bookstore . what do you do ?	やあジョー僕はダンス店で仕事してるんだ	n
person 2	i am a librarian for children . i really enjoy it i love books .	子供のために素晴らしい本が好きなの	n
person 1	we have that in common then ! books and stories have always been my passion	本や小説はいつも私の情熱だった	n
person 2	maybe we could have a future given our shared love of books !	多分未来を知ることができた本を共有していたかもしれない ！	n
person 1	who knows ? ! never say never !	誰が知っているんだ ！	n
person 2	forgive me if that was too forward as i recently got divorced .	最近離婚した時のことは許してください	n
person 1	no problem , i took no offense ! where do you live ? i live in the city .	悪気はない街に住んでるんだ	n
person 2	me too . do you have any kids ? i love children but not so much on the caretaking .	私も子供が好きなのよでも介護者にはあまり会わないわ	n
person 1	i work close to home , within walking distance ! i do not even need to drive .	家の近くまで歩いて歩いて家に歩いて歩いて歩いて歩いてるのよ運転も必要ないわ	n
person 2	that is awesome public transit is the best .	最高のメディアだわ	n
person 1	no kids yet ! . did not have much family life growing up , was just me and my mom .	まだ子供が生まれてない家族が生まれてきたんだママとママだけだったんだ	n
person 2	got it . do you have any hobbies ?	わかったよホットチョコレートあるか ？	n
person 1	well , i am an avid reader ! haha . i really like art too .	私も読者の読書家なの	n
person 2	i adore art . although i can barely see it sometimes with my bifocals .	私は芸術が大好きだけど私の専門家にはよく見えないの	n
