# Supplementary material
Source: ML conference proceedings conference paper supplement (https://aclanthology.org/2022.eval4nlp-1.9)
Supplement: SupplementaryMaterial [file 1447.xlsx]

## Sheet: Sheet1
person	source	translation	evaluation: is this a good translation?
person 1	hi there ! do you work ?	こんにちは、仕事ですか ？	n
person 2	no . that is probably the reason my wife ca not stand me anymore .	それは妻が私を支持しない理由かもしれない	n
person 1	sorry to hear that . my grandchildren are everything to me !	残念だわ私の孫は私にとって全てよ	n
person 2	that is wonderful to hear ! what do you do for fun ?	それはよかった何のために楽しんでるんだ ？	n
person 1	i quilt quite a bit and relax to classical music after work ! you ?	私はもう少し音楽を勉強して音楽を楽しむのが好きなんだぞ ！	n
person 2	i go to mexico and ski ! but i hate the food down there	メキシコに行くのが嫌いなんだ	n
person 1	agree ! i spent lots of time in mexico in my youth , i was a wild child !	メキシコではずっと野生の子供だったんだ ！	n
person 2	i bet you were ! what is it that you do for a living ?	生きてたのは何のためだ ？	n
person 1	i am a pharmacist ; i finally grew up !	精神科医だやっと成長した	n
person 2	i will never grow up ! my favorite food is still cheetos !	私は成長しません私の好きな食べ物はまだチーズトスです ！	n
person 1	mine is medium rare steak !	俺のステーキは稀なステーキだ ！	n
person 2	rare steak and cheetos ! yes ! ! sign me up !	ステーキとチーズとチーズだサインしろ ！	n
person 1	sounds perfect to me ! any children ?	子供はいないのか ？	n
person 2	my wife would not let me get close enough to her with my orange cheetos fingers !	妻はオレンジの指で近づけないだろう ！	n
person 1	that is funny ! too bad , maybe someday you will !	面白いわねいつかまた会えるかもしれないわ ！	n
person 2	maybe i will find the perfect one in mexico to mother my children	メキシコでは完璧な一人を見つけられるかも	n
