# Supplementary material
Source: ML conference proceedings conference paper supplement (https://aclanthology.org/2022.eval4nlp-1.9)
Supplement: SupplementaryMaterial [file 1447.xlsx]

## Sheet: Sheet1
person	source	translation	evaluation: is this a good translation?
person 1	hi there ! do you work ?	こんにちは！仕事はしてるの？	y
person 2	no . that is probably the reason my wife ca not stand me anymore .	ううん。だから多分嫁さんに毛嫌いされてるんだよな。	y
person 1	sorry to hear that . my grandchildren are everything to me !	そりゃ大変だね。私は孫一筋なのよ。	y
person 2	that is wonderful to hear ! what do you do for fun ?	いいなあ！趣味は何？	y
person 1	i quilt quite a bit and relax to classical music after work ! you ?	刺し子なんかを結構やってる。あとは仕事終わってからクラシック音楽聞いてリラックスしたり！あなたは？	y
person 2	i go to mexico and ski ! but i hate the food down there	メキシコ旅行に行って、スキーする！でもあそこの食べ物が嫌いなんだよね。	y
person 1	agree ! i spent lots of time in mexico in my youth , i was a wild child !	分かるわ！メキシコには若いとき長いこと行ってたのよ。随分反抗的な子供だったの！	y
person 2	i bet you were ! what is it that you do for a living ?	だろうね！仕事は何してるの？	y
person 1	i am a pharmacist ; i finally grew up !	薬剤師。やっと少しは成長したってとこかしらね！	y
person 2	i will never grow up ! my favorite food is still cheetos !	僕は永遠の子供さ！今でもチートスが一番好きだしね！	y
person 1	mine is medium rare steak !	私はミディアムレアのステーキが一番！	y
person 2	rare steak and cheetos ! yes ! ! sign me up !	レアのステーキとチートス！いいね！のった！	y
person 1	sounds perfect to me ! any children ?	完璧だよね！子供はいるの？	y
person 2	my wife would not let me get close enough to her with my orange cheetos fingers !	チートスまみれでオレンジ色の指してたらさ、嫁さんが近寄らせてくれないんだ！	y
person 1	that is funny ! too bad , maybe someday you will !	笑える！あちゃー。まあいつかはね！	y
person 2	maybe i will find the perfect one in mexico to mother my children	それかメキシコで僕の子供産んでくれる完璧な人、見つけるかなあ。	y
