# Supplementary material
Source: ML conference proceedings conference paper supplement (https://aclanthology.org/2022.eval4nlp-1.9)
Supplement: SupplementaryMaterial [file 1448.xlsx]

## Sheet: Sheet1
person	source	translation	evaluation: is this a good translation?
person 1	hi how are you today	こんにちは、調子はどう？	y
person 2	great ! i am watching some classic sitcoms and listening to fall out boy . you ?	元気だよ！定番ドラマ見たりフォール・アウト・ボーイを聞いたりしてる。あなたは？	y
person 1	i am good do you work	元気。仕事は？してるの？	y
person 2	no , my cars bad . an old honda that is on its last legs .	してない。車の調子が悪いのよね。古いホンダなんだけどもう廃車寸前って感じで。	y
person 1	is it a civic though	でもどうせシビックなんでしょ？	n
person 2	yes actually . i mostly take the subway now . i like talking to the travelers there .	うん図星。だから今は地下鉄ばっかり使ってる。地下鉄でほかの乗客としゃべるのが好きなの。	y
person 1	nice do you ever cook	いいじゃない。料理は？したことあるの？	y
person 2	i order out . what do you like to do ?	ご飯はテイクアウト。趣味は何？	y
person 1	i make food very often	いつもよく料理してる。	y
person 2	awesome . i like reading . i am excited for some new political thrillers .	すごいじゃん。私は読書が好き。新しいスパイ小説が出たんだけど、超楽しみ。	y
person 1	what do you read often	何をよく読むの？	y
person 2	patterson and clancy , a lot of political thrillers .	パターソンとクランシーね。とにかくスパイ小説いっぱい。	y
person 1	nice do you work then	へえ、いいじゃない。で、仕事は？	y
person 2	no , i am a student .	してないって、学生なのよ。	y
person 1	what are you studying then	じゃあ何の勉強してるわけ？	y
person 2	at the moment , my favorite fall out boy album , but i study nursing in school	今この瞬間は、大好きなフォール・アウト・ボーイのアルバム。でも学校では看護を学んでる。	y
