# Supplementary material
Source: ML conference proceedings conference paper supplement (https://aclanthology.org/2022.eval4nlp-1.9)
Supplement: SupplementaryMaterial [file 1448.xlsx]

## Sheet: Sheet1
person	source	translation	evaluation: is this a good translation?
person 1	hi how are you today	今日はどうしてる ？	n
person 2	great ! i am watching some classic sitcoms and listening to fall out boy . you ?	いいぞ古典的な席を見てるんだお前は ？	n
person 1	i am good do you work	よくやった	n
person 2	no , my cars bad . an old honda that is on its last legs .	いいえ車が最後の脚にありますようにしてください	n
person 1	is it a civic though	しかし、文明です	n
person 2	yes actually . i mostly take the subway now . i like talking to the travelers there .	地下鉄は運転手と話したいんだ	n
person 1	nice do you ever cook	最高の料理を作ってくれてありがとう	n
person 2	i order out . what do you like to do ?	私が命令しますどうしますか ？	n
person 1	i make food very often	私はよく食物を作る	n
person 2	awesome . i like reading . i am excited for some new political thrillers .	すばらしい新しい政治家のために本を読んでいる	n
person 1	what do you read often	何を読んでいるのかよく読んでみてください	n
person 2	patterson and clancy , a lot of political thrillers .	息子と息子は政治家の多くの政治家です	n
person 1	nice do you work then	じゃあよくやった	n
person 2	no , i am a student .	いや俺は学生だ	y
person 1	what are you studying then	なら何を勉強してるんだ ？	y
person 2	at the moment , my favorite fall out boy album , but i study nursing in school	私のお気に入りの息子が誕生日に別れた時学校で勉強していた	n
