# Supplementary material
Source: ML conference proceedings conference paper supplement (https://aclanthology.org/2022.eval4nlp-1.9)
Supplement: SupplementaryMaterial [file 1451.xlsx]

## Sheet: Sheet1
person	source	translation	evaluation: is this a good translation?
person 1	hello , would you like to go to a concert ?	もしもしコンサートに行きませんか ？	n
person 2	sure ! what kind of concert ?	確かに何のコンサートだ ？	n
person 1	i think i will ponder that for a while .	しばらくは成長すると思うわ	n
person 2	ah . we should go see a ted talks !	話をしよう	n
person 1	do they have any about philosophy ? that is my major at umass .	哲学はあるのか ？	n
person 2	yes they have tons of any types of talks . they are so interesting	何百トンもの話をしているそうだ興味深い話だ	n
person 1	yes , they could be . i know a good vegan restaurant we could go to after .	そうかもしれないが後で良いレストランが見つかると思う	n
person 2	oh yummy . i like to stay in shape so vegan food is amazing	おいしそうな感じでいたいわとっても素敵な料理になりたい	n
person 1	i keep an angel on my hip to remind me to eat right .	俺は天使を食べないようにしてきたんだ	n
person 2	haha , that is a great idea . i just try to stay active	そりゃいい考えだじっとしていたい	n
person 1	it is a little tattoo . it has brown eyes , like mine .	刺青だ茶色の瞳がある	n
person 2	how lovely . do you do anything for fun ?	なんて素敵なの何か楽しいことしたの ？	n
person 1	just going to concerts . the rest of the time i am philosophizing .	私が哲学的になっている間だけよ	n
person 2	you should really great . i like to walk in the forest	本当に森の中を歩きたいの	n
person 1	that sounds nice . if you walk briskly it could keep you in shape .	いいね歩き続けられるなら	n
person 2	i do ! much better than sitting in front of the tv all day	テレビの前に座った方がいいわ	n
