# Supplementary material
Source: ML conference proceedings conference paper supplement (https://aclanthology.org/2022.eval4nlp-1.9)
Supplement: SupplementaryMaterial [file 1451.xlsx]

## Sheet: Sheet1
person	source	translation	evaluation: is this a good translation?
person 1	hello , would you like to go to a concert ?	こんにちは、コンサートに行かない？	y
person 2	sure ! what kind of concert ?	いいね！どんなコンサート？	y
person 1	i think i will ponder that for a while .	うーん、もう少し考えさせて。	y
person 2	ah . we should go see a ted talks !	あ、それならTEDトーク見に行くべきだわ！	y
person 1	do they have any about philosophy ? that is my major at umass .	哲学関係のトークはあるかな？マサチューセッツ大で専攻してるんだけど。	y
person 2	yes they have tons of any types of talks . they are so interesting	うん、どんなトークでも山ほどあるよ。すごく面白いんだから。	y
person 1	yes , they could be . i know a good vegan restaurant we could go to after .	うん、そうよね。おいしいヴィーガンのレストランを知ってるからトークの後にどうかな。	y
person 2	oh yummy . i like to stay in shape so vegan food is amazing	わあ、おいしそう！体型が気になるからヴィーガンの食事って最高。	y
person 1	i keep an angel on my hip to remind me to eat right .	私はお尻に天使をくっつけてるの。食べすぎに気を付けるように。	y
person 2	haha , that is a great idea . i just try to stay active	あはは！それいいアイデアね。私はひたすら運動がんばってる。	y
person 1	it is a little tattoo . it has brown eyes , like mine .	小さいタトゥーなんだけど、私と同じ茶色の眼をしてるの。	y
person 2	how lovely . do you do anything for fun ?	わあかわいい！何か趣味はある？	y
person 1	just going to concerts . the rest of the time i am philosophizing .	コンサートに行くことだけ。他の時間は哲学的思考に耽ってる。	y
person 2	you should really great . i like to walk in the forest	なんだかとってもすごそうね。私は森を散歩するのが好き。	y
person 1	that sounds nice . if you walk briskly it could keep you in shape .	いいじゃない。早歩きは体型維持に効果ありよ。	y
person 2	i do ! much better than sitting in front of the tv all day	早歩きしてる！一日テレビの前に座ってるより全然いいよね。	y
