# Supplementary material
Source: ML conference proceedings conference paper supplement (https://aclanthology.org/2022.eval4nlp-1.9)
Supplement: SupplementaryMaterial [file 1465.xlsx]

## Sheet: Sheet1
person	source	translation	evaluation: is this a good translation?
person 1	hi there , how are you ?	やあ元気かい ？	y
person 2	hi i am doing great how are you	元気にしているよ	n
person 1	i am good . busy planning my trip to europe	私は元気よ私の旅はロープに忙しいの	n
person 2	that sounds fun what part will you be visiting	楽しそうだな	n
person 1	milan and paris because i love shopping on the weekends !	週末に買い物が好きなんだ ！	n
person 2	those are beautiful places to visit . i love going to the movie theater	あそこが素敵な場所なんだ映画祭に行きたい	n
person 1	i love going to dance lessons with my boyfriend , keeping active	恋人と踊るのが大好きなの	n
person 2	that is cool he goes with you . i mainly have my dogs to hang out with	あなたと一緒に行くのは楽しいわ犬と一緒にいなきゃ	n
person 1	we have dogs too , only reasons we will never go on a cruise ship	犬もいるし船には乗らないわ	n
person 2	i have golden retrievers what kind do you have	金貨を持ってきたんだけど	n
person 1	a big great dane . makes me feel teeny though i have a womanly figure of size 12	私は女性が 1 2 歳の女性を感じさせてくれた	n
person 2	they are very big dogs . what do you do for a living	彼らはとても大きい犬だ何をしている ？	n
person 1	i do not work , i just play !	俺は仕事じゃないただの遊びだ ！	n
person 2	i am in the family business , a juggler at the circus	俺は家族の仕事に来たんだサーカスでギラーをやってるんだ	n
person 1	wow . you should come to our dance class and mix in some juggling	ダンス教室に来て少し遊んで	n
person 2	that would be fun .	楽しいわね	y
