# Supplementary material
Source: ML conference proceedings conference paper supplement (https://aclanthology.org/2022.eval4nlp-1.9)
Supplement: SupplementaryMaterial [file 1465.xlsx]

## Sheet: Sheet1
person	source	translation	evaluation: is this a good translation?
person 1	hi there , how are you ?	こんにちは、元気？	y
person 2	hi i am doing great how are you	やあ、とっても元気にしてる。あなたは？	y
person 1	i am good . busy planning my trip to europe	うん、元気よ。ヨーロッパ旅行の計画で忙しくしてる。	y
person 2	that sounds fun what part will you be visiting	楽しそう。ヨーロッパのどこら辺に行くの？	y
person 1	milan and paris because i love shopping on the weekends !	ミラノとパリ。週末に買い物するのが大好きだから！	y
person 2	those are beautiful places to visit . i love going to the movie theater	ミラノもパリもきれいなところよね。私は映画館に行くのが大好き。	y
person 1	i love going to dance lessons with my boyfriend , keeping active	私は彼氏とダンスのレッスンに行くのも大好き。運動運動。	y
person 2	that is cool he goes with you . i mainly have my dogs to hang out with	彼氏が一緒に来るってすごい。私と一緒に来てくれるのは大体ペットの犬たちばっかり。	y
person 1	we have dogs too , only reasons we will never go on a cruise ship	私たちも犬は飼ってるよ。犬だけのために絶対クルーズ船には乗らないのよね。	y
person 2	i have golden retrievers what kind do you have	私、ゴールデンレトリバーを飼ってるけどあなたの犬の種類は？	y
person 1	a big great dane . makes me feel teeny though i have a womanly figure of size 12	おっきなグレートデン。私ふっくら体型でサイズ12なんだけど自分がちっちゃく感じるの。	y
person 2	they are very big dogs . what do you do for a living	グレートデンはすごく大きいもんね。仕事は何してるの？	y
person 1	i do not work , i just play !	働いてない、遊ぶだけ！	y
person 2	i am in the family business , a juggler at the circus	私は家業のサーカスでジャグリングしてる。	y
person 1	wow . you should come to our dance class and mix in some juggling	うわあ！是非私たちのダンス教室に来て、ダンスにジャグリングを取り入れてほしい。	y
person 2	that would be fun .	それ楽しそう。	y
