# Supplementary material
Source: ML conference proceedings conference paper supplement (https://aclanthology.org/2022.eval4nlp-1.9)
Supplement: SupplementaryMaterial [file 1471.xlsx]

## Sheet: Sheet1
person	source	translation	evaluation: is this a good translation?
person 1	hello , how are you doing ?	こんにちは、元気ですか ？	y
person 2	i am going good just listening to elvis . you ?	ジェビスの話を聞いていい ？	n
person 1	oh great choice ! one of my favorites i just put my daughter to bed .	いい選択だ娘をベッドに寝かせてくれ	n
person 2	how old is your daughter ?	娘さんはいくつ ？	y
person 1	she is 1 and a half . do you have any children ?	1 1 歳半だ子供はいるか ？	n
person 2	i do , i named her blue . i love blue , even have blue hair !	私は青で青い髪も愛してるわ ！	n
person 1	that is awesome . purple is my favorite color .	それはいい紫は大好きな色だ	y
person 2	how much do you love it ? you drive a purple car ? guess what color mine is ?	どのくらい好きなの ？	n
person 1	it is not my daily driver but i do have a purple car yours is blue ! ?	私の運転じゃないけどあなたの車はブルーカーなの ？	n
person 2	haha yes ! everything is blue pretty much all the way down to my shoes .	そうだすべて青なんだ靴の下に	n
person 1	do you like the blue song ?	青の歌は好きか ？	y
person 2	i love it . i am blue ! haha you ?	俺は青だぞお前は ？	n
person 1	when i was younger it was one of my favorites lol .	俺が若い頃は好きだった	y
person 2	it still is one of mine !	まだ俺の仲間だ ！	n
person 1	awesome ! so what do you do for work ?	すごいわ仕事は何をしてるの ？	y
person 2	i work at the hair salon , that is how i change my hair to blue	美容室で働いてるのそれが私の髪を青に変える方法	n
