# Supplementary material
Source: ML conference proceedings conference paper supplement (https://aclanthology.org/2022.eval4nlp-1.9)
Supplement: SupplementaryMaterial [file 1471.xlsx]

## Sheet: Sheet1
person	source	translation	evaluation: is this a good translation?
person 1	hello , how are you doing ?	こんにちは、元気にしてる？	y
person 2	i am going good just listening to elvis . you ?	元気よ、ちょうどエルビスを聴いてるところ。あなたはどう？	y
person 1	oh great choice ! one of my favorites i just put my daughter to bed .	わあ、いい趣味！私のお気に入りの一つよ。私今ちょうど娘を寝かしつけてきたところ。	y
person 2	how old is your daughter ?	娘さんはいくつ？	y
person 1	she is 1 and a half . do you have any children ?	一歳半。あなたは子供いる？	y
person 2	i do , i named her blue . i love blue , even have blue hair !	いるわよ、ブルーって名付けた。青が大好きでね、髪も青にしちゃってる。	y
person 1	that is awesome . purple is my favorite color .	それはすごい！私は色なら紫が大好き。	y
person 2	how much do you love it ? you drive a purple car ? guess what color mine is ?	大好きってどれくらい好きなの？車も紫？私の車って何色だと思う？	y
person 1	it is not my daily driver but i do have a purple car yours is blue ! ?	いつも乗る車じゃないけど、紫の車持ってるわよ。あなたの車は青！？	y
person 2	haha yes ! everything is blue pretty much all the way down to my shoes .	あはは、そう！頭から靴に至るまで大体なんでも全部青。	y
person 1	do you like the blue song ?	青い歌は好き？	y
person 2	i love it . i am blue ! haha you ?	大好き。アイ・アム・ブルー！はは、あなたは？	y
person 1	when i was younger it was one of my favorites lol .	若いときは大好きな歌の一つだったわ（笑）	y
person 2	it still is one of mine !	私は今でも大好き！	y
person 1	awesome ! so what do you do for work ?	いいね！それで仕事は何をしてるの？	y
person 2	i work at the hair salon , that is how i change my hair to blue	美容室で働いてるの。それで髪を青に染めたの。	y
