# Supplementary material
Source: ML conference proceedings conference paper supplement (https://aclanthology.org/2022.eval4nlp-1.9)
Supplement: SupplementaryMaterial [file 1472.xlsx]

## Sheet: Sheet1
person	source	translation	evaluation: is this a good translation?
person 1	hello how are you today ?	こんにちは、今日は調子どう？	y
person 2	very well , thank you . and yourself ? i am just reading a book	おかげさまで好調よ、あなたは？今ちょうど本を読んでたの。	y
person 1	i am great just playing with my tool	俺も絶好調。今はツールをいじってたとこ。	y
person 2	oh what kind of tool ? i use tools such as paint brushes as an artist	えっ、ツールってどんな？私はアーティストだから、絵筆とかのツールなら使うけど。	y
person 1	i am building a computer with my tool	俺はツールを使ってパソコンを自作してるんだ。	y
person 2	cool ! i could never do that . my husband uses computers to type out his books	すごい！そんなの私無理だわ。旦那は本を執筆するのにパソコン使うけど。	y
person 1	i love tools and i love flying my own plane	ツール類と、自分の飛行機を操縦するのが大好きなんだ。	y
person 2	i never flew a plane , but i have flow from france to canada where i live	飛行機操縦なんかしたことないわ。でもフランスから今住んでるカナダには飛行機で来たの。	y
person 1	i dropped out of school to fly	俺、航空学校は中途退学しちゃったんだ。	y
person 2	oh my . are you happy with that decision ?	あらら、でもその決断で良かったと思ってるんでしょ？	y
person 1	of course i am i like reading	もちろんだよ。俺本読むのも好きだよ。	y
person 2	we have a hobby in common !	私たちに共通の趣味ね！	y
