# Supplementary material
Source: ML conference proceedings conference paper supplement (https://aclanthology.org/2022.eval4nlp-1.9)
Supplement: SupplementaryMaterial [file 1472.xlsx]

## Sheet: Sheet1
person	source	translation	evaluation: is this a good translation?
person 1	hello how are you today ?	今日はどう ？	n
person 2	very well , thank you . and yourself ? i am just reading a book	本を読んでるだけよ	n
person 1	i am great just playing with my tool	私はただの道具で遊んでいるだけだ	n
person 2	oh what kind of tool ? i use tools such as paint brushes as an artist	どんな道具だ ？ 芸術家として使う道具だ	n
person 1	i am building a computer with my tool	私は自分の道具でコンピューターを作ってるのよ	y
person 2	cool ! i could never do that . my husband uses computers to type out his books	夫が本を読むようにコンピューターを使って	n
person 1	i love tools and i love flying my own plane	自分の飛行機を操縦するのが好きなの	n
person 2	i never flew a plane , but i have flow from france to canada where i live	飛行機に乗ったことはなかったが私はここに住んでいる所から地味がする	n
person 1	i dropped out of school to fly	学校から落ちちゃったんだけど	n
person 2	oh my . are you happy with that decision ?	そんな決定に満足してるの ？	n
person 1	of course i am i like reading	もちろん、私は読みたいです。	n
person 2	we have a hobby in common !	趣味があるんだ ！	n
