# Supplementary material
Source: ML conference proceedings conference paper supplement (https://aclanthology.org/2022.eval4nlp-1.9)
Supplement: SupplementaryMaterial [file 1473.xlsx]

## Sheet: Sheet1
person	source	translation	evaluation: is this a good translation?
person 1	hi how are you doing ?	お元気ですか ？	y
person 2	hello , i am doing very well . how are you ?	元気ですか ？	n
person 1	i am good . just got back from my weekly book club .	一週間前にクラブから戻ってきたばかりなんだ	n
person 2	i used to belong to one that was exclusively cookbooks .	私はいつも隔離されていた本のひとつに過ぎなかった	n
person 1	interesting ! you must really enjoy cooking !	面白い料理を楽しんでくれ ！	n
person 2	i do , but i do not bake . do you run or hike ?	俺は焼くんじゃないお前は逃げるのか ？	n
person 1	i like to take walks with my mom , her and i are very close like best friends .	ママと一緒に散歩したいのママと一緒に行くのが一番の友達みたい	n
person 2	that is very nice . what are your favorite shows ?	いいわねどんなショーが好きなの ？	n
person 1	i do not really like tv too much . i prefer to spend time on my phone .	テレビが好きじゃない電話で時間を過ごしたいの	n
person 2	i watch face off , it is very interesting .	私は顔をオフにし、非常に面白いです。	n
person 1	what is the show about ?	ショーは何なの ？	n
person 2	a reality show about make up artists . they are so creative .	芸術家になると現実的になる彼らは創造的だ	n
person 1	cool ! do you have any pets ?	いいぞペットはいるか ？	y
person 2	i have three dogs . they are my world .	犬が ３ 匹いる俺の世界だ	n
person 1	i like dogs , but i am really more of a cat person .	犬が好きですが猫より猫のほうがもっと好きです	n
person 2	cats are awesome too , i do not have one yet .	猫も素晴らしいしまだ持ってない	n
