# Supplementary material
Source: ML conference proceedings conference paper supplement (https://aclanthology.org/2022.eval4nlp-1.9)
Supplement: SupplementaryMaterial [file 1473.xlsx]

## Sheet: Sheet1
person	source	translation	evaluation: is this a good translation?
person 1	hi how are you doing ?	こんにちは、お元気ですか？	y
person 2	hello , i am doing very well . how are you ?	こんにちは、とても元気にしてますよ。あなたはどうです？	y
person 1	i am good . just got back from my weekly book club .	調子いいですよ。ちょうど週一の読書クラブから戻ってきたところなんです。	y
person 2	i used to belong to one that was exclusively cookbooks .	前に料理本に特化した読書会に参加していたことがありましたよ。	y
person 1	interesting ! you must really enjoy cooking !	面白いですね！本当にお料理が大好きなんですね！	y
person 2	i do , but i do not bake . do you run or hike ?	ええ、そうなんです。でもお菓子やパン作りはしないんですよね。ランニングとかハイキングとかはしますか？	y
person 1	i like to take walks with my mom , her and i are very close like best friends .	母と散歩するのは好きです。母と私は親友みたいに仲がいいんですよ。	y
person 2	that is very nice . what are your favorite shows ?	すごくいいですね。好きなテレビ番組は？	y
person 1	i do not really like tv too much . i prefer to spend time on my phone .	テレビは実はあんまり好きじゃないんですよ。携帯いじってる方が好きなんです。	y
person 2	i watch face off , it is very interesting .	私、フェイス・オフを見てるんですけど、ものすごく面白いですよ。	y
person 1	what is the show about ?	どんな番組なんですか？	y
person 2	a reality show about make up artists . they are so creative .	メイクアップアーティストのリアリティ番組なんですけど、みんな本当にクリエイティブなんですよ。	y
person 1	cool ! do you have any pets ?	面白そう！何かペット飼ってます？	y
person 2	i have three dogs . they are my world .	犬を3匹。この子たちはもう私の全て。	y
person 1	i like dogs , but i am really more of a cat person .	私も犬は好きですけど、やっぱりどっちかというと猫派です。	y
person 2	cats are awesome too , i do not have one yet .	猫もいいですよね。まだ飼ったことはありませんけど。	y
