# Supplementary material
Source: ML conference proceedings conference paper supplement (https://aclanthology.org/2022.eval4nlp-1.9)
Supplement: SupplementaryMaterial [file 1480.xlsx]

## Sheet: Sheet1
person	source	translation	evaluation: is this a good translation?
person 1	good morning , how are you ?	おはよう、元気？	y
person 2	i am fine . how are you ?	うん元気。あなたは？	y
person 1	i am good . just seen my husband and 5 kids off out the door	元気よ。やっと旦那と5人の子供を送り出したところ。	y
person 2	wow five kids , what a big family . i am trying to find a good mystery movie .	うわあ、子供5人も。すごい大家族。私は面白いミステリー映画がないか探してるとこ。	y
person 1	you ever seen any spanish movies ? there are some good ones from spain . i was born there	スペイン映画って見たことある？スペインはすごくいい映画があるのよ。私スペイン生まれなの。	y
person 2	i am open to all types of movies . that is awesome . do you have any hobbies ?	どんな映画でも偏見なく観てみるわよ。すごいじゃない。何か趣味は？	y
person 1	could you consider being a veterinarian as a hobby ?	趣味ででも獣医になってみるってどう思う？	y
person 2	definitely ! i love running its a great escape .	是非！私、ランニング大好き。大事なひとり時間なのよ。	y
person 1	agreed , that and a healthy diet i say ! i am personally a vegetarian	そうよね、それとヘルシーな食事よ！私自身はベジタリアンなの。	y
person 2	i love meat too much to go vegetarian . do you like green tea . i love green tea .	でもベジタリアンになるには私、お肉愛が強すぎるかも。緑茶は好き？私は大好き。	y
person 1	i love green tea . what else do you love ?	私も大好き。他には何が好き？	y
person 2	i love writing . i am an author of three books .	色々と書くのが大好き。3冊本を書いたのよ。	y
person 1	wow ! ! if i did not have such a large family , maybe i would have time for that	すごい！私もこんなに大家族じゃなかったら、執筆の時間も取れたかもな。	y
person 2	yeah , i always try to make time for writing . what else do you like to do ?	そうね、私はいつも頑張って書く時間を確保してるわ。他には？	y
person 1	visit my birth country every now and again , you ever been to spain ?	生まれ故郷の国に時々帰ること。スペインに行ったことある？	y
person 2	i have not yet , its on my bucket list . i have only been out of country to visit jamaica .	ううん、ないの。でも死ぬまでに一度は行きたいな。海外はジャマイカにしか行ったことないの。	y
