# Supplementary material
Source: ML conference proceedings conference paper supplement (https://aclanthology.org/2022.eval4nlp-1.9)
Supplement: SupplementaryMaterial [file 1480.xlsx]

## Sheet: Sheet1
person	source	translation	evaluation: is this a good translation?
person 1	good morning , how are you ?	おはよう元気だった ？	n
person 2	i am fine . how are you ?	元気よ元気 ？	y
person 1	i am good . just seen my husband and 5 kids off out the door	夫と ５ 人の子供がドアから出てきたのを見ただけだ	n
person 2	wow five kids , what a big family . i am trying to find a good mystery movie .	5 人の子供が大きくて素晴らしい映画を探してるの	n
person 1	you ever seen any spanish movies ? there are some good ones from spain . i was born there	映画を見たことがあるか ？	n
person 2	i am open to all types of movies . that is awesome . do you have any hobbies ?	映画のように開店してるのすごいわね	n
person 1	could you consider being a veterinarian as a hobby ?	趣味のある獣医になれるかしら ？	n
person 2	definitely ! i love running its a great escape .	最高の逃げ方が好きなんだ	n
person 1	agreed , that and a healthy diet i say ! i am personally a vegetarian	同意したよ健康食も健康食もある個人的にベジタリアンだ	n
person 2	i love meat too much to go vegetarian . do you like green tea . i love green tea .	ベジタリアンの肉が好きなの緑の紅茶が好きなの	n
person 1	i love green tea . what else do you love ?	緑の紅茶が好き他に何を愛してる ？	n
person 2	i love writing . i am an author of three books .	本は大好きだ本は ３ 冊の本だ	n
person 1	wow ! ! if i did not have such a large family , maybe i would have time for that	大家族がいなければ時間が必要だった	n
person 2	yeah , i always try to make time for writing . what else do you like to do ?	いつも手紙を書きたいんだ他にどうしたい ？	n
person 1	visit my birth country every now and again , you ever been to spain ?	私の国に来てまた生まれたことは ？	n
person 2	i have not yet , its on my bucket list . i have only been out of country to visit jamaica .	まだありませんが私のバケツのリストにはジャマイカに会いに来ただけです	n
