# Supplementary material
Source: ML conference proceedings conference paper supplement (https://aclanthology.org/2022.eval4nlp-1.9)
Supplement: SupplementaryMaterial [file 1482.xlsx]

## Sheet: Sheet1
person	source	translation	evaluation: is this a good translation?
person 1	ugh , searching for a job is so exhausting ! ya know ?	仕事を探しても退屈だよ	n
person 2	i hear you ! although being a national guard officer has its perks	聞いているわでも国家警備員としての責任者としての責任があるのよ	n
person 1	oh definitely . i have not worked for some time now . its taken its toll on my kids	確かに私は子供たちの面倒を見てきたわ	n
person 2	i am sorry to hear . but public affairs liason is my main job . you will find one for sure !	残念だけど私の仕事は公務員が見つけてくれるわ ！	n
person 1	i hope so . i have talents i am fluent in three languages !	３ 語で才能があるんだ ！	n
person 2	wow ! that is amazing . all i have is my 2011 passa volkswagen . . . lol	信じられない 2 0 1 1 1 1 1 1 年になった	n
person 1	haha ! i used to drive a vw bus , around the country to rush concerts . lol ! !	バス運転してたんだ急いでくれ ！	n
person 2	that is awesome ! feeling a bit sluggish lately with all the fast food i am eating . . .	最高だな食事の時間に少しナーバスになった気分だ	n
person 1	oh yeah ? i do not let my kids any of that crap . you should cut it out !	子供たちにそんなことさせないでやめてよ ！	n
person 2	agree ! not time to cook at all . do you cook ?	みんな料理する時間がないのよ	n
person 1	only cos i have to . kids gotta eat !	子供を食べるしかないんだ ！	n
person 2	that is true ! trying to master cooking italian food .	それは本当ですマスター食べ物を作るために料理をしようとしていたんです	n
person 1	mmmm yum ! i sure do love spaghetti	ああ、そうだね、スパゲッティを愛しているよ	n
person 2	yes ! trying to master lasagna .	はい、旦那様を助けようとしています	n
person 1	that is easy . only 7 layers , ha ha ha	簡単だ、ただ 7 人しかいない	n
person 2	it is . trying to cook more so i do not spend money on fast food .	もっと早く料理しようとしてるだから早く食べたくないんだ	n
