# Supplementary material
Source: ML conference proceedings conference paper supplement (https://aclanthology.org/2022.eval4nlp-1.9)
Supplement: SupplementaryMaterial [file 1482.xlsx]

## Sheet: Sheet1
person	source	translation	evaluation: is this a good translation?
person 1	ugh , searching for a job is so exhausting ! ya know ?	ああもう！仕事探しってのはめちゃくちゃだるいぜ！だよなあ？	y
person 2	i hear you ! although being a national guard officer has its perks	まったくだよなあ！といっても州兵の仕事ってな、ちょっと美味しいんだけどよ。	y
person 1	oh definitely . i have not worked for some time now . its taken its toll on my kids	ああ、そうだろうよ！俺、ここしばらく働いてないからよ、子供にかなり悪いことしちゃってるぜ。	y
person 2	i am sorry to hear . but public affairs liason is my main job . you will find one for sure !	そりゃかわいそうだな。でも俺の仕事って広報担当ばっかだぜ。お前も絶対なんか見つかるって。	y
person 1	i hope so . i have talents i am fluent in three languages !	だといいけどよ。才能はあるんだぜ、三か国語ぺらっぺらだしな！	y
person 2	wow ! that is amazing . all i have is my 2011 passa volkswagen . . . lol	おお！すげえじゃんかよ。俺なんて2011年製ワーゲンパサートしか出せるものないぜ・・・。（笑）	y
person 1	haha ! i used to drive a vw bus , around the country to rush concerts . lol ! !	あはは！俺。昔ワーゲンバスに乗ってたぜ。ラッシュのライブ行くのに国じゅう走ってたもんよ（笑）！！	y
person 2	that is awesome ! feeling a bit sluggish lately with all the fast food i am eating . . .	そりゃすげーや！最近ファストフードばっか食ってたら体がだるくてよ・・・。	y
person 1	oh yeah ? i do not let my kids any of that crap . you should cut it out !	まじかよ？俺は子供にゃ絶対そんなゴミは食わせねえよ。お前も少し控えろや！	y
person 2	agree ! not time to cook at all . do you cook ?	そうだよな！自分で料理する時間が全然なくってよ。お前料理するか？	y
person 1	only cos i have to . kids gotta eat !	そりゃやんなきゃなんねえからさ。子供に食わせねえと！	y
person 2	that is true ! trying to master cooking italian food .	そりゃそうだな！イタリア料理が作れるように頑張ってんだぜ。	y
person 1	mmmm yum ! i sure do love spaghetti	うーん、ウマそうじゃん！俺はスパゲッティが大の好物だぜ。	y
person 2	yes ! trying to master lasagna .	そうか！ラザニアをマスターできるよう頑張ってるとこだ。	y
person 1	that is easy . only 7 layers , ha ha ha	そりゃ簡単だ、たったの7枚重ねだろ、ははは！	y
person 2	it is . trying to cook more so i do not spend money on fast food .	そうそう。ファストフードに金使わなくていいようにもっと自炊しようとしてんだ。	y
