# Supplementary material
Source: ML conference proceedings conference paper supplement (https://aclanthology.org/2022.eval4nlp-1.9)
Supplement: SupplementaryMaterial [file 1484.xlsx]

## Sheet: Sheet1
person	source	translation	evaluation: is this a good translation?
person 1	hello !	こんにちは！	y
person 2	hello , how are you ? i just got home from the gym . really wiped , big workout !	こんにちは、元気？私今ジムから帰ったとこ。へっとへとよ、いっぱい運動した！	y
person 1	good , same here , my best friend lives in a big city and i just visted with him	いいね、私もへとへと。親友が大都市に住んでて、ちょうど一緒に行ってきたの。	n
person 2	nice ! i hope your trip to the city was smooth . it can be tough traveling .	いいじゃん！色々スムーズにいってたらいいけど。旅行ってけっこう大変だからさ。	y
person 1	what did you do at the gym ? i know working at a grocery store is enough	ジム行って何してきたの？私はスーパーで働くだけでいっぱいいっぱいだけど。	y
person 2	mostly lifting weights . yes , a grocery store job sounds tough ! eating dinner now .	ほとんどウエイトリフティングね。そうなんだ、スーパーで働くって大変そう！今、ご飯食べてるところ。	y
person 1	same , my mother like to grow plants in her garden so i am eating them now	私も。お母さんが庭で植物育てるのが好きでさ、それを今私が食べてるの。	y
person 2	fresh from the garden is the best ! my cat is trying to steal my chicken	庭から取れたて、って最高ね！今ネコが私のチキンを盗み食いしようとしてる。	y
person 1	ahahah , my mother is a social worker for the schools so she always brings home strays	あっはは！私のお母さん、学校のソーシャルワーカーだからさ、いっつも野良猫連れて帰ってくるわ。	y
person 2	your mom sounds like a busy woman ! do you like music ? i love metallica !	あなたのお母さん、忙しそうね！音楽は好き？私メタリカの大ファン！	y
person 1	i do , i grew up listening to metallica ! thank you father	音楽好きよ。メタリカ聴いて育ったんだから！お父さんありがとう、って感じ。	y
person 2	i am hoping to go to a concert soon . love music !	近々ライブに行けたらいいなと思ってるのよ。音楽大好き！	y
