# Supplementary material
Source: ML conference proceedings conference paper supplement (https://aclanthology.org/2022.eval4nlp-1.9)
Supplement: SupplementaryMaterial [file 1484.xlsx]

## Sheet: Sheet1
person	source	translation	evaluation: is this a good translation?
person 1	hello !	こんにちは ！	y
person 2	hello , how are you ? i just got home from the gym . really wiped , big workout !	ジムから帰ってきたばかりで大成功だったわ	n
person 1	good , same here , my best friend lives in a big city and i just visted with him	いい友達もいるし彼と一緒に住んでたの	n
person 2	nice ! i hope your trip to the city was smooth . it can be tough traveling .	良い旅だったわね街への旅は大変だったわ	n
person 1	what did you do at the gym ? i know working at a grocery store is enough	ジムで何をしたかは知っている食料店で働いていることは十分知っている	n
person 2	mostly lifting weights . yes , a grocery store job sounds tough ! eating dinner now .	大食店の店で食事をしているようだ	n
person 1	same , my mother like to grow plants in her garden so i am eating them now	私の母も、同じように、同じように、私は今、彼女の庭で植物を成長させるようになっているので、私はそれらを食べている	n
person 2	fresh from the garden is the best ! my cat is trying to steal my chicken	庭の新しい庭から私の猫を盗もうとしているので、私のニワトリを盗もうとしています	n
person 1	ahahah , my mother is a social worker for the schools so she always brings home strays	母はいつも学校で仕事をしているだからいつも家に帰ってくる	n
person 2	your mom sounds like a busy woman ! do you like music ? i love metallica !	ママは忙しいようだ音楽が好きなんだろ ？	n
person 1	i do , i grew up listening to metallica ! thank you father	パパに聞いてくれてありがとう	n
person 2	i am hoping to go to a concert soon . love music !	もうすぐコンサートに行きたいわ	n
