# Supplementary material
Source: ML conference proceedings conference paper supplement (https://aclanthology.org/2022.eval4nlp-1.9)
Supplement: SupplementaryMaterial [file 1486.xlsx]

## Sheet: Sheet1
person	source	translation	evaluation: is this a good translation?
person 1	hey . how are you doing today ?	よう！今日の調子はどうだい？	y
person 2	doing just great thanks you for asking	調子いいぜ、気にしてくれてありがとよ。	y
person 1	no problem . so what do you do for fun my guy ?	当然よ。んで友よ、お前の趣味は何だ？	y
person 2	i like bowling but rather go fishing	ボウリングなんか好きだぜ、でもやっぱり釣りだな。	y
person 1	i like fishing . i live near the gulf of mexico . how about yourself ?	俺も釣りは好きだぜ。メキシコ湾近くに住んでんだ。お前は？	y
person 2	i in the state of south carolina	俺はサウス・カロライナ州。	y
person 1	nice i am in mississippi . do you work ?	そりゃいいな、俺はミシシッピ。仕事は？	y
person 2	yes i work every day doing care giver	おう、毎日介護の仕事してるぜ。	y
person 1	do you consider yourself a good person ? how did you get into that line of work ?	お前どんだけ人間出来てると思ってるんだ？どうやって介護関係の仕事になんてつけたんだよ？	y
person 2	i am a good person like working with the senior	そりゃ年寄りと仕事できる位には人間出来てるぜ。	y
person 1	oh . you sound like a friendly guy . old people get on my nerves though	えっ、そうか。まあお前って近づきやすい感じだよな。でも俺は年寄り見てるとイライラしちまうんだよ。	y
person 2	sorry to here a bout that , you have to have patient	そりゃあちょっといけねーな。忍耐が必要だぜ。	y
person 1	i guess so . i lived with my grandparents and they pretend like they cant hear or see .	そうだろうけどよ。自分のじいさんばあさんと暮らしてたんだけどさ、あいつら聞こえないふり、見えないふりするんだぜ。	y
person 2	funny , my mother is 96 so that take patient	そりゃ可笑しいや。俺の母さんは96だぜ、そりゃ忍耐がいるよ。	y
person 1	yeah i bet it does . wow , 96 years old	そらそうだわな、うわあ、96歳かよ。	y
person 2	yes 96 , matter fax i lift weights too , how about you	そうだぜ96。ところで実は俺ウェイトリフティングもやるんだ。お前は？	n
