# Supplementary material
Source: ML conference proceedings conference paper supplement (https://aclanthology.org/2022.eval4nlp-1.9)
Supplement: SupplementaryMaterial [file 1486.xlsx]

## Sheet: Sheet1
person	source	translation	evaluation: is this a good translation?
person 1	hey . how are you doing today ?	今日はどうしてる ？	n
person 2	doing just great thanks you for asking	お願いしてくれてありがとう	n
person 1	no problem . so what do you do for fun my guy ?	どうでもいい俺の男に何をする気だ ？	n
person 2	i like bowling but rather go fishing	ボーリングが好きだが釣りに行けばいい	n
person 1	i like fishing . i live near the gulf of mexico . how about yourself ?	メキシコのメキシコの近くに住んでるんだ	n
person 2	i in the state of south carolina	私は南のバロロウズ州に住んでいる	n
person 1	nice i am in mississippi . do you work ?	私は起訴されてよかった仕事は ？	n
person 2	yes i work every day doing care giver	はい毎日仕事をしています	n
person 1	do you consider yourself a good person ? how did you get into that line of work ?	自分が善人だと思っているのか ？ どうやってその線に入ったんだ ？	n
person 2	i am a good person like working with the senior	俺は上級の仕事をしている男だ	n
person 1	oh . you sound like a friendly guy . old people get on my nerves though	親切な老人のように聞こえるが俺の神経の中に年寄りがいる	n
person 2	sorry to here a bout that , you have to have patient	ごめんなさい我慢しなくちゃいけないことがあるの	n
person 1	i guess so . i lived with my grandparents and they pretend like they cant hear or see .	私は祖父と住んでいて彼らの声が聞こえないフリをして生きてたの	n
person 2	funny , my mother is 96 so that take patient	面白いね母は 6 6 歳だから我慢して	n
person 1	yeah i bet it does . wow , 96 years old	そうだな 9 6 歳くらいかな	n
person 2	yes 96 , matter fax i lift weights too , how about you	そうだファックスも 7 6 歳だが君はどうだ	n
