# Supplementary material
Source: ML conference proceedings conference paper supplement (https://aclanthology.org/2022.eval4nlp-1.9)
Supplement: SupplementaryMaterial [file 1495.xlsx]

## Sheet: Sheet1
person	source	translation	evaluation: is this a good translation?
person 1	hi there how are you ?	こんにちは、元気にしてる？	y
person 2	i am doing good , and yourself ?	元気だよ、そちらは？	y
person 1	pretty good , i am kinda tired i just got done at the gym	上々だけど、ジムで運動し終わったとこでちょっと疲れてるというか。	y
person 2	i am getting tired but i do not go to a gym , i exercise at home with my gf	僕も疲れてきてるけど、ジムに行くんじゃなくて、彼女と自分ちで運動してたんだ。	y
person 1	i am not disciplined enough for that , i have to go to the gym lol	私そんなに自制できないもんなぁ、やっぱりジムに行かなくちゃダメだ（笑）	y
person 2	ll , i feel like i would be uncomfortable there because i have been having social anxiety .	(笑）、僕、前からあがり症があるからジムにはちょっと居づらいかもなぁって気がする。	y
person 1	oh no , that is not good ! what gets you through it ?	あらあ、それは大変ね！どうやって切り抜けてる？	y
person 2	my close friends and my gf , we have been together 7 years , i am with them a lot .	親友たちと、7年付き合ってる彼女のおかげ。このみんなとずっと一緒にいるんだ。	y
person 1	that is good , whenever my anxiety gets to me i take a drive	そりゃよかった。私は精神的に不安になったら車でドライブするの。	y
person 2	i like walks too , but drives with good music are great	僕は散歩も好きだよ。でもいい音楽聴きながらドライブするって最高だよね。	y
person 1	yeah they are , it helps my bf has a ferrari that he lets me drive	うん、そうね。彼氏が持ってるフェラーリを運転させてもらうの。	y
person 2	ferrari , that is nice , i live in alabama and love the old back roads	フェラーリ、そりゃすごいや。僕はアラバマに住んでるんだけど、あの昔ながらの田舎道が大好きなんだ。	y
