# Supplementary material
Source: ML conference proceedings conference paper supplement (https://aclanthology.org/2022.eval4nlp-1.9)
Supplement: SupplementaryMaterial [file 1495.xlsx]

## Sheet: Sheet1
person	source	translation	evaluation: is this a good translation?
person 1	hi there how are you ?	お元気ですか ？	y
person 2	i am doing good , and yourself ?	私はうまくやっている、あなた自身は ？	n
person 1	pretty good , i am kinda tired i just got done at the gym	私はジムで疲れただけだ	n
person 2	i am getting tired but i do not go to a gym , i exercise at home with my gf	疲れたけどジムには行かない家で練習しない	n
person 1	i am not disciplined enough for that , i have to go to the gym lol	ジムに行かなくては	n
person 2	ll , i feel like i would be uncomfortable there because i have been having social anxiety .	私はそこが嫌な気分になってきたから気分が悪くなってきたのよ	n
person 1	oh no , that is not good ! what gets you through it ?	それは良くない何が入ってるんだ ？	n
person 2	my close friends and my gf , we have been together 7 years , i am with them a lot .	近くの友達と 7 年一緒にいたんだずっと一緒にいた	n
person 1	that is good , whenever my anxiety gets to me i take a drive	それはいいことだ私が運転するときには	n
person 2	i like walks too , but drives with good music are great	私も散歩が好きだけど良い音楽で運転できるわ	n
person 1	yeah they are , it helps my bf has a ferrari that he lets me drive	そうよ私の車を運転させてくれるの	n
person 2	ferrari , that is nice , i live in alabama and love the old back roads	***	n
